# Supplementary material for: Effectiveness and Safety of Ayurvedic Medicines in Type 2 Diabetes Mellitus Management: A Systematic Review and Meta-Analysis
Source: Frontiers journal article supplement (doi:10.3389/fphar.2022.821810), 2022-06-08
Supplement: Data_Sheet_1.zip [file Data_Sheet_1.zip]

## Appendix S1: Search strategies.

### MEDLINE (Ovid) (1946-16 January 2021): 2042 records

1. exp Diabetes mellitus, type 2/
2. (Type\* adj3 ("2" or "II" or two\*) adj3 (diabete\* or diabetic\*)).tw.
3. ((Late or maturit\* or adult\* or slow\*) adj3 onset\* adj3 (diabete\* or diabetic\*)).tw.
4. ((Ketosis-resistant\* or stable\*) adj3 (diabete\* or diabetic\*)).tw.
5. ((Non-insulin\* or non insulin\* or noninsulin\*) adj3 depend\* adj3 (diabete\* or diabetic\*)).tw.
6. (NIDDM or T2DM or T2D).tw.
7. Prameha.mp. [mp=title, abstract, original title, name of substance word, subject heading word, floating sub-heading word, keyword heading word, organism supplementary concept word, protocol supplementary concept word, rare disease supplementary concept word, unique identifier, synonyms]
8. Madhumeha.mp. [mp=title, abstract, original title, name of substance word, subject heading word, floating sub-heading word, keyword heading word, organism supplementary concept word, protocol supplementary concept word, rare disease supplementary concept word, unique identifier, synonyms]
9. or/1-8
10. exp Medicine, Ayurvedic/
11. Ayurved\*.tw,ot.
12. \*Medicine, traditional/
13. exp Complementary medicine/tu [Therapeutic use]
14. ((Plant\* or herb\* or medicin\* or drug\* or therap\* or intervention\* or extract\* or formulation\* or preparation\* or supplement\*) adj6 (Ayurved\* or Hindu or Indian)).tw,ot.
15. exp Plants, medicinal/tu [Therapeutic use]
16. exp Plant extracts/tu [Therapeutic use]
17. exp Plants/tu [Therapeutic use]
18. ((Plant\* or herb\*) adj6 (medicin\* or drug\* or therap\* or intervention\* or extract\* or formulation\* or preparation\* or supplement\*)).tw,ot.
19. exp Ethnobotany/
20. exp Ethnopharmacology/
21. (Ethnobotan\* or ethno botan\* or ethnopharmacolog\* or ethno pharmacolog\*).tw,ot.
22. \*Phytotherapy/
23. (Phytotherap\* or phyto therap\*).tw,ot.
24. exp Acanthaceae/
25. exp Aegle/
26. exp Aloe/
27. exp Artocarpus/
28. exp Azadirachta/
29. exp Butea/
30. exp Cassia/
31. exp Catharanthus/
32. exp Cinnamomum/
33. exp Cinnamomum aromaticum/
34. exp Cinnamomum zeylanicum/
35. exp Clerodendrum/
36. exp Cucurbitaceae/
37. exp Curcuma/
38. exp Cyamopsis/
39. exp Ficus/
40. exp Garlic/
41. exp Ginger/
42. exp Gymnema/
43. exp Gymnema sylvestre/

44. exp Ipomoea batatas/
45. exp Momordica charantia/
46. exp Murraya/
47. exp Nigella sativa/
48. exp Ocimum sanctum/
49. exp Onions/
50. exp Phyllanthus/
51. exp Phyllanthus emblica/
52. exp Piper/
53. exp Plantago/
54. exp Psyllium/
55. exp Pterocarpus/
56. exp Punicaceae/
57. exp Salacia/
58. exp Solanum/
59. exp Syzygium/
60. exp Tamarindus/
61. exp Tinospora/
62. exp Trigonella/
63. exp Lead/
64. exp Tin/
65. (Aegle marmelos or Crateva marmelos or Allium cepa or Allium sativum or Aloe vera or Artocarpus heterophyllus or Azadirachta indica or Melia azadirachta or Butea monosperma or Cassia auriculata or Catharanthus roseus or Vinca rosea or Cinnamomum aromaticum or Cinnamomum cassia or Cinnamomum tamala or Cinnamomum verum or Cinnamomum zeylanicum or Clerodendrum phlomides or Coccinia grandis or Coccinia cordifolia or Coccinia indica or Curcuma longa or Cyamopsis tetragonoloba or Emblica officinalis or Phyllanthus emblica or Enicostemma axillare or Enicostemma littorale or Ficus carica or Gymnema lactiferum or Gymnema sylvestre or Hygrophila schulli or Asteracantha longifolia or Ipomoea batatas or Momordica charantia or Murraya koenigii or Nigella sativa or Ocimum tenuiflorum or Ocimum sanctum or Phyllanthus amarus or Phyllanthus niruri or Piper longum or Plantago arenaria or Plantago psyllium or Pterocarpus marsupium or Pterocarpus santalinus or Punica granatum or Salacia chinensis or Salacia reticulata or Solanum torvum or Syzygium cumini or Eugenia jambolana or Syzygium jambolanum or Syzygium jambos or Eugenia jambos or Tamarindus indica or Tinospora cordifolia or Trigonella foenum-graecum or Zingiber officinale).tw,ot.
66. (Lead or Tin or Black bitumen or Black asphalt\*).tw,ot.
67. (Arogyavardhini\* or Arogyavardhini\* or Ayaskriti or Chandrakant\* or Chandraprabh\* or Devdarvarisht\* or Devdarvarist\* or Dhanvantar\* or Gokshuradi\* or Goksuradi\* or Jambudaryisht\* or Jambudaryist\* or Katakakhadiradi\* or Kathakakhadiradi\* or Kshirabal\* or Ksirabal\* or Lodhrasav\* or Mamajjak\* or Nag\* or Naag\* or Nimbadi\* or Nimadi\* or Nishamalak\* or Nisamalak\* or Nishamlak\* or Nisamlak\* or Nishakathakadi\* or Nisakathakadi\* or Phalatrikadi\* or Falatrikadi\* or Rajanyamalakadi\* or Rajanyamlakadi\* or Saptamrit\* or Shaptamrit\* or Saptargangyadi\* or Shilajit\* or Silajit\* or Shilajat\* or Silajat\* or Shilajeet\* or Silajeet\* or Siva\* or Shiva\* or Somnath\* or Shomnath\* or Triphal\* or Trifal\* or Trivang\* or Tribang\* or Vang\* or Bang\* or Vasant Kusumakar\* or Vashant Kushumakar\* or Vasanta Kusumakar\* or Vashanta Kushumakar\* or Vasantkusumakar\* or Vashantkushumakar\* or Vasantakusumakar\* or Vashantakushumakar\* or Basant Kusumakar\* or Bashant Kushumakar\* or Basanta Kusumakar\* or Bashanta Kushumakar\* or Basantkusumakar\* or Bashantkushumakar\* or Basantakusumakar\* or Bashantakushumakar\* or Vijayasaradi\* or Vijayasharadi\* or Vijaysaradi\* or Vijaysharadi\* or Bijayasaradi\* or Bijayasharadi\* or Bijaysaradi\* or Bijaysharadi\* or Vyoshadi\* or Vyosadi\* or Byoshadi\* or Byosadi\*).tw,ot.
68. (Ayush 82 or Ayush-82 or Cogent DB or Diabecon or D 400 or D-400 or GS4 or Gurmar or Hyponidd or Inolter or M 93 or M-93 or MA 471 or MA-471 or Nosulin or Pancreas Tonic).tw,ot.

69. or/10-68
70. Randomized controlled trial.pt.
71. Controlled clinical trial.pt.
72. Clinical trial.pt.
73. exp Clinical trials as Topic/
74. Placebos/
75. Random allocation/
76. Double-blind method/
77. Single-blind method/
78. Cross-over studies/
79. ((Random\$ or control\$ or clinical\$) adj3 (trial\$ or stud\$)).tw.
80. (Random\$ adj3 allocat\$).tw.
81. Placebo\$.tw.
82. ((Singl\$ or doubl\$ or trebl\$ or tripl\$) adj (blind\$ or mask\$)).tw.
83. (Crossover\$ or (cross adj over\$)).tw.
84. or/70-83
85. 9 and 69 and 84

### **Embase (Ovid) (1974-16 January 2021): 13989 records**

1. exp Diabetes mellitus, type 2/
2. (Type\* adj3 ("2" or "II" or two\*) adj3 (diabete\* or diabetic\*)).tw.
3. ((Late or maturit\* or adult\* or slow\*) adj3 onset\* adj3 (diabete\* or diabetic\*)).tw.
4. ((Ketosis-resistant\* or stable\*) adj3 (diabete\* or diabetic\*)).tw.
5. ((Non-insulin\* or non insulin\* or noninsulin\*) adj3 depend\* adj3 (diabete\* or diabetic\*)).tw.
6. (NIDDM or T2DM or T2D).tw.
7. Prameha.mp.
8. Madhumeha.mp.
9. or/1-8
10. exp Medicine, Ayurvedic/
11. Ayurved\*.tw,ot.
12. \*Medicine, traditional/
13. exp Complementary medicine/tu [Therapeutic use]
14. ((Plant\* or herb\* or medicin\* or drug\* or therap\* or intervention\* or extract\* or formulation\* or preparation\* or supplement\*) adj6 (Ayurved\* or Hindu or Indian)).tw,ot.
15. exp Plants, medicinal/tu [Therapeutic use]
16. exp Plant extracts/tu [Therapeutic use]
17. exp Plants/tu [Therapeutic use]
18. ((Plant\* or herb\*) adj6 (medicin\* or drug\* or therap\* or intervention\* or extract\* or formulation\* or preparation\* or supplement\*)).tw,ot.
19. exp Ethnobotany/
20. exp Ethnopharmacology/
21. (Ethnobotan\* or ethno botan\* or ethnopharmacolog\* or ethno pharmacolog\*).tw,ot.
22. \*Phytotherapy/
23. (Phytotherap\* or phyto therap\*).tw,ot.
24. exp Acanthaceae/
25. exp Aegle/
26. Aloe.mp. [mp=title, abstract, original title, name of substance word, subject heading word, floating sub-heading word, keyword heading word, organism supplementary concept word, protocol supplementary concept word, rare disease supplementary concept word, unique identifier, synonyms]
27. Artocarpus.mp. [mp=title, abstract, original title, name of substance word, subject heading word, floating sub-heading word, keyword heading word, organism supplementary concept word, protocol supplementary concept word, rare disease supplementary concept word, unique identifier, synonyms]

28. Azadirachta.mp. or exp Azadirachta indica/
29. exp Butea monosperma/ or exp Butea/ or Butea.mp.
30. Cassia.mp. or cassia extract/ or Cinnamomum cassia/ or exp Cassia/ or Cinnamomum cassia extract/
31. exp Catharanthus/
32. Cinnamomum.mp. or Cinnamomum camphora/ or exp Cinnamomum/
33. exp Cinnamomum/
34. exp Cinnamomum aromaticum/
35. exp Cinnamomum zeylanicum/
36. exp Clerodendrum/
37. exp Cucurbitaceae/
38. exp Curcuma/
39. exp Cyamopsis/
40. exp Ficus/
41. exp Garlic/
42. exp Ginger/
43. exp Gymnema/
44. exp Gymnema sylvestre/
45. exp Ipomoea batatas/
46. exp Momordica charantia/
47. exp Murraya/
48. exp Nigella sativa/
49. exp Ocimum sanctum/
50. exp Phyllanthus/
51. exp Phyllanthus emblica/
52. exp Piper/
53. exp Plantago/
54. exp Psyllium/
55. exp Pterocarpus/
56. exp Punicaceae/
57. exp Salacia/
58. exp Solanum/
59. Syzygium cumini/ or Syzygium.mp. or exp Syzygium/ or Syzygium cumini extract/
60. Tamarindus.mp. or exp Tamarind/
61. Tinospora cordifolia/ or Tinospora.mp. or exp Tinospora/ or Tinospora cordifolia extract/
62. Fenugreek/ or Trigonella.mp. or Trigonella foenum graecum extract/ or nonhuman/ or exp Trigonella/ or plant extract/ or plant seed/
63. exp Lead/ or Lead.mp.
64. Tin derivative/ or Tin.mp. or exp Tin/
65. Onion extract/ or Onion.mp. or exp Onion/
66. Piper.mp. or exp "Piper (plant)"/
67. (Lead or Tin or Black bitumen or Black asphalt\*).tw,ab,kw,ot.
68. (Aegle marmelos or Crateva marmelos or Allium cepa or Allium sativum or Aloe vera or Artocarpus heterophyllus or Azadirachta indica or Melia azadirachta or Butea monosperma or Cassia auriculata or Catharanthus roseus or Vinca rosea or Cinnamomum aromaticum or Cinnamomum cassia or Cinnamomum tamala or Cinnamomum verum or Cinnamomum zeylanicum or Clerodendrum phlomides or Coccinia grandis or Coccinia cordifolia or Coccinia indica or Curcuma longa or Cyamopsis tetragonoloba or Emblica officinalis or Phyllanthus emblica or Enicostemma axillare or Enicostemma littorale or Ficus carica or Gymnema lactiferum or Gymnema sylvestre or Hygrophila schulli or Asteracantha longifolia or Ipomoea batatas or Momordica charantia or Murraya koenigii or Nigella sativa or Ocimum tenuiflorum or Ocimum sanctum or Phyllanthus amarus or Phyllanthus niruri or Piper longum or Plantago arenaria or Plantago psyllium or Pterocarpus marsupium or Pterocarpus santalinus or Punica granatum or Salacia chinensis or Salacia reticulata or Solanum torvum or Syzygium cumini or Eugenia jambolana or Syzygium jambolanum or Syzygium jambos or Eugenia jambos or

Tamarindus indica or Tinospora cordifolia or Trigonella foenum-graecum or Zingiber officinale).tw,ab,kw,ti.

69. (Arogyavardhini\* or Arogyvardhini\* or Ayaskriti or Chandrakant\* or Chandraprabh\* or Devdarvarisht\* or Devdarvarist\* or Dhanvantar\* or Gokshuradi\* or Goksuradi\* or Jambudaryisht\* or Jambudaryist\* or Katakakhadiradi\* or Kathakakhadiradi\* or Kshirabal\* or Ksirabal\* or Lodhrasav\* or Mamajjak\* or Nag\* or Naag\* or Nimbadi\* or Nimadi\* or Nishamalak\* or Nisamalak\* or Nishamlak\* or Nisamlak\* or Nishakathakadi\* or Nisakathakadi\* or Phalatrikadi\* or Falatrikadi\* or Rajanyamalakadi\* or Rajanyamlakadi\* or Saptamrit\* or Shaptamrit\* or Saptargangyadi\* or Shilajit\* or Silajit\* or Shilajat\* or Silajat\* or Shilajeet\* or Silajeet\* or Siva\* or Shiva\* or Somnath\* or Shomnath\* or Triphal\* or Trifal\* or Trivang\* or Tribang\* or Vang\* or Bang\* or Vasant Kusumakar\* or Vashant Kushumakar\* or Vasanta Kusumakar\* or Vashanta Kushumakar\* or Vasantkusumakar\* or Vashantkushumakar\* or Vasantakusumakar\* or Vashantakushumakar\* or Basant Kusumakar\* or Bashant Kushumakar\* or Basanta Kusumakar\* or Bashanta Kushumakar\* or Basantkusumakar\* or Bashantkushumakar\* or Basantakusumakar\* or Bashantakushumakar\* or Vijayasaradi\* or Vijayasharadi\* or Vijaysaradi\* or Vijaysharadi\* or Bijayasaradi\* or Bijayasharadi\* or Bijaysaradi\* or Bijaysharadi\* or Vyoshadi\* or Vyosadi\* or Byoshadi\* or Byosadi\*).tw,ot,ab,kw,ti.

70. or/10-69

71. Clinical trial/

72. Randomized controlled trial/

73. Randomization/

74. Single blind procedure/

75. Double blind procedure/

76. Crossover procedure/

77. Placebo/

78. Randomi?ed controlled trial\$.tw.

79. RCT.tw.

80. Random allocation.tw.

81. Randomly allocated.tw.

82. Allocated randomly.tw.

83. (Allocated adj2 random).tw.

84. Single blind\$.tw.

85. Double blind\$.tw.

86. ((Treble or triple) adj blind\$.tw.

87. Placebo\$.tw.

88. Prospective study/

89. or/71-88

90. Case study/

91. Case report.tw.

92. Abstract report/ or letter/

93. or/90-92

94. 89 not 93

95. 9 and 70 and 94

### **CINAHL (EBSCOhost) (1937-16 January 2021): 193 records**

(MH "medicine, Ayurvedic" OR Ayurved\*) AND (MH "diabetes mellitus, type 2" OR diabet\* OR NIDDM OR T2DM OR T2D OR Madhumeh\* OR Prameh\*)

### **PsycINFO (Ovid) (1806-16 January 2021): 595 records**

1. exp Diabetes mellitus/

2. (Type\* adj3 ("2" or "II" or two\*) adj3 (diabete\* or diabetic\*)).tw.

3. ((Late or maturit\* or adult\* or slow\*) adj3 onset\* adj3 (diabete\* or diabetic\*)).tw.

4. ((Ketosis-resistant\* or stable\*) adj3 (diabete\* or diabetic\*)).tw.

5. ((Non-insulin\* or non insulin\* or noninsulin\*) adj3 depend\* adj3 (diabete\* or diabetic\*)).tw.
6. (NIDDM or T2DM or T2D).tw.
7. 1 or 2 or 3 or 4 or 5 or 6
8. Ayurvedic medicine.mp.
9. Ayurved\*.tw,ot.
10. Traditional medicine.mp.
11. exp Complementary medicine/
12. ((Plant\* or herb\* or medicin\* or drug\* or therap\* or intervention\* or extract\* or formulation\* or preparation\* or supplement\*) adj6 (Ayurved\* or Hindu or Indian)).tw,ot.
13. exp "Medicinal herbs and plants"/
14. Plant extracts.mp.
15. Plants.mp.
16. ((Plant\* or herb\*) adj6 (medicin\* or drug\* or therap\* or intervention\* or extract\* or formulation\* or preparation\* or supplement\*)).tw,ot.
17. Ethnobotany.mp.
18. Ethnopharmacology.mp.
19. (Ethnobotan\* or ethno botan\* or ethnopharmacolog\* or ethno pharmacolog\*).tw,ot.
20. Phytotherapy.mp.
21. (Phytotherap\* or phyto therap\*).tw,ot.
22. Acanthaceae.mp.
23. Aegle.mp.
24. Aloe.mp.
25. Artocarpus.mp.
26. Azadirachta.mp.
27. Butea.mp.
28. Cassia.mp.
29. Cinnamomum.mp.
30. Cinnamomum zeylanicum.mp.
31. Clerodendrum.mp.
32. Cucurbitaceae.mp.
33. Curcuma.mp.
34. Ficus.mp.
35. Garlic.mp.
36. Ginger.mp.
37. Gymnema.mp.
38. Ipomoea batatas.mp.
39. Momordica charantia.mp.
40. Murraya.mp.
41. Nigella sativa.mp.
42. Ocimum sanctum.mp.
43. Onions.mp.
44. Piper.mp.
45. Plantago.mp.
46. Psyllium.mp.
47. Pterocarpus.mp.
48. Salacia.mp.
49. Solanum.mp.
50. Syzygium.mp.
51. Tamarindus.mp.
52. Tinospora.mp.
53. Trigonella.mp.
54. Lead.mp.
55. Tin.mp.
56. (Aegle marmelos or Crateva marmelos or Allium cepa or Allium sativum or Aloe vera or Artocarpus heterophyllus or Azadirachta indica or Melia azadirachta or Butea monosperma or

Cassia auriculata or Catharanthus roseus or Vinca rosea or Cinnamomum aromaticum or Cinnamomum cassia or Cinnamomum tamala or Cinnamomum verum or Cinnamomum zeylanicum or Clerodendrum phlomides or Coccinia grandis or Coccinia cordifolia or Coccinia indica or Curcuma longa or Cyamopsis tetragonoloba or Emblica officinalis or Phyllanthus emblica or Enicostemma axillare or Enicostemma littorale or Ficus carica or Gymnema lactiferum or Gymnema sylvestre or Hygrophila schulli or Asteracantha longifolia or Ipomoea batatas or Momordica charantia or Murraya koenigii or Nigella sativa or Ocimum tenuiflorum or Ocimum sanctum or Phyllanthus amarus or Phyllanthus niruri or Piper longum or Plantago arenaria or Plantago psyllium or Pterocarpus marsupium or Pterocarpus santalinus or Punica granatum or Salacia chinensis or Salacia reticulata or Solanum torvum or Syzygium cumini or Eugenia jambolana or Syzygium jambolanum or Syzygium jambos or Eugenia jambos or Tamarindus indica or Tinospora cordifolia or Trigonella foenum-graecum or Zingiber officinale).tw,ot.

57. (Lead or Tin or Black bitumen or Black asphalt\*).tw,ot.

58. (Arogyavardhini\* or Arogyvardhini\* or Ayaskriti or Chandrakant\* or Chandraprabh\* or Devdarvarisht\* or Devdarvarist\* or Dhanvantar\* or Gokshuradi\* or Goksuradi\* or Jambudaryisht\* or Jambudaryist\* or Katakakhadiradi\* or Kathakakhadiradi\* or Kshirabal\* or Ksirabal\* or Lodhrasav\* or Mamajjak\* or Nag\* or Naag\* or Nimbadi\* or Nimadi\* or Nishamalak\* or Nisamalak\* or Nishamlak\* or Nisamlak\* or Nishakathakadi\* or Nisakathakadi\* or Phalatrikadi\* or Falatrikadi\* or Rajanyamalakadi\* or Rajanyamlakadi\* or Saptamrit\* or Shaptamrit\* or Saptargangyadi\* or Shilajit\* or Silajit\* or Shilajat\* or Silajat\* or Shilajeet\* or Silajeet\* or Siva\* or Shiva\* or Somnath\* or Shomnath\* or Triphal\* or Trifal\* or Trivang\* or Tribang\* or Vang\* or Bang\* or Vasant Kusumakar\* or Vashant Kushumakar\* or Vasanta Kusumakar\* or Vashanta Kushumakar\* or Vasantkusumakar\* or Vashantkushumakar\* or Vasantakusumakar\* or Vashantakushumakar\* or Basant Kusumakar\* or Bashant Kushumakar\* or Basanta Kusumakar\* or Bashanta Kushumakar\* or Basantkusumakar\* or Bashantkushumakar\* or Basantakusumakar\* or Bashantakushumakar\* or Vijayasaradi\* or Vijayasharadi\* or Vijaysaradi\* or Vijaysharadi\* or Bijayasaradi\* or Bijayasharadi\* or Bijaysaradi\* or Bijaysharadi\* or Vyoshadi\* or Vyosadi\* or Byoshadi\* or Byosadi\*).tw,ot.

59. (Ayush 82 or Ayush-82 or Cogent DB or Diabecon or D 400 or D-400 or GS4 or Gurmar or Hyponidd or Inolter or M 93 or M-93 or MA 471 or MA-471 or Nosulin or Pancreas Tonic).tw,ot.

60. 8 or 9 or 10 or 11 or 12 or 13 or 14 or 15 or 16 or 17 or 18 or 19 or 20 or 21 or 22 or 23 or 24 or 25 or 26 or 27 or 28 or 29 or 30 or 31 or 32 or 33 or 34 or 35 or 36 or 37 or 38 or 39 or 40 or 41 or 42 or 43 or 44 or 45 or 46 or 47 or 48 or 49 or 50 or 51 or 52 or 53 or 54 or 55 or 56 or 57 or 58 or 59

61. 7 and 60

Search strategy included only disease and treatment domains. Study design domain was removed.

### **Web of Science (1900-16 January 2021): 44 records**

#1 TI= ("Type 2 diabetes mellitus" OR (type\* adj3 ("2" or "II" or two\*) adj3 (diabete\* or diabetic\*)) OR ((Late or maturit\* or adult\* or slow\*) adj3 onset\* adj3 (diabete\* or diabetic\*)) OR ((ketosis-resistant\* or stable\*) adj3 (diabete\* or diabetic\*)) OR ((non-insulin\* or non insulin\* or noninsulin\*) adj3 depend\* adj3 (diabete\* or diabetic\*)) OR (NIDDM or T2DM or T2D) OR (Prameh\* OR Madhumeh\*))

#2 TI= ("Ayurvedic medicine" OR Ayurved\* OR "traditional medicine" OR "complementary medicine" OR ((plant\* or herb\* or medicin\* or drug\* or therap\* or intervention\* or extract\* or formulation\* or preparation\* or supplement\*) adj6 (Ayurved\* or Hindu or Indian)) OR "medicinal plants" OR "plant extracts" OR plants OR ((plant\* or herb\*) adj6 (medicin\* or drug\* or therap\* or intervention\* or extract\* or formulation\* or preparation\* or supplement\*)) OR ethnobotany OR ethnopharmacology OR (ethnobotan\* or ethno botan\* or ethnopharmacolog\*)

or ethno pharmacolog\*) OR phytotherapy OR (phytotherap\* or phyto therap\*) OR Acanthaceae OR Aegle OR Aloe OR Artocarpus OR azadirachta OR Butea OR Cassia OR Catharanthus OR Cinnamomum OR "Cinnamomum aromaticum" OR "Cinnamomum zeylanicum" OR Clerodendrum OR Cucurbitaceae OR Curcuma OR Cyamopsis OR Ficus OR Garlic OR Ginger OR Gymnema OR "Gymnema sylvestre" OR "Ipomoea batatas" OR Momordica charantia OR Murraya OR "Nigella sativa" OR "Ocimum sanctum" OR Onions OR Phyllanthus OR Phyllanthus emblica OR Piper OR Plantago OR Psyllium OR Pterocarpus OR Punicaceae OR Salacia OR Solanum OR Syzygium OR Tamarindus OR Tinospora OR Trigonella OR Lead OR Tin OR (Aegle marmelos or Crateva marmelos or Allium cepa or Allium sativum or Aloe vera or Artocarpus heterophyllum or "Azadirachta indica" or "Melia azadirachta" or "Butea monosperma" or "Cassia auriculata" or "Catharanthus roseus" or "Vinca rosea" or "Cinnamomum aromaticum" or "Cinnamomum cassia" or "Cinnamomum tamala" or "Cinnamomum verum" or "Cinnamomum zeylanicum" or "Clerodendrum phlomidis" or "Coccinia grandis" or Coccinia cordifolia or Coccinia indica or "Curcuma longa" or "Cyamopsis tetragonoloba" or "Emblica officinalis" or "Phyllanthus emblica" or "Enicostemma axillare" or "Enicostemma littorale" or "Ficus carica" or "Gymnema lactiferum" or "Gymnema sylvestre" or "Hygrophila schulli" or "Asteracantha longifolia" or "Ipomoea batatas" or "Momordica charantia" or "Murraya koenigii" or "Nigella sativa" or "Ocimum tenuiflorum" or "Ocimum sanctum" or "Phyllanthus amarus" or "Phyllanthus niruri" or "Piper longum" or "Plantago Arenaria" or "Plantago psyllium" or "Pterocarpus marsupium" or "Pterocarpus santalinus" or "Punica granatum" or "Salacia chinensis" or "Salacia reticulata" or "Solanum torvum" or "Syzygium cumini" or "Eugenia jambolana" or "Syzygium jambolanum" or "Syzygium jambos" or "Eugenia jambos" or "Tamarindus indica" or "Tinospora cordifolia" or "Trigo") OR (Arogyavardhini\* or Arogyvardhini\* or Ayaskriti or Chandrakant\* or Chandraprabh\* or Devdarvarisht\* or Devdarvarist\* or Dhanvantar\* or Gokshuradi\* or Goksuradi\* or Jambudaryisht\* or Jambudaryist\* or Katakakhadiradi\* or Kathakakhadiradi\* or Kshirabal\* or Ksirabal\* or Lodhrasav\* or Mamajjak\* or Nag\* or Naag\* or Nimbadi\* or Nimadi\* or Nishamalak\* or Nisamalak\* or Nishamlak\* or Nisamlak\* or Nishakathakadi\* or Nisakathakadi\* or Phalatrikadi\* or Falatrikadi\* or Rajanyamalakadi\* or Rajanyamlakadi\* or Saptamrit\* or Shaptamrit\* or Saptargangyadi\* or Shilajit\* or Silajit\* or Shilajat\* or Silajat\* or Shilajeet\* or Silajeet\* or Siva\* or Shiva\* or Somnath\* or Shomnath\* or Triphal\* or Trifal\* or Trivang\* or Tribang\* or Vang\* or Bang\* or Vasant Kusumakar\* or Vashant Kushumakar\* or Vasant Kushumakar\* or Vashanta Kushumakar\* or Vasantkusumakar\* or Vashantkushumakar\* or Vasantakusumakar\* or Vashantakushumakar\* or Basant Kusumakar\* or Bashant Kushumakar\* or Basanta Kushumakar\* or Bashanta Kushumakar\* or Basantkusumakar\* or Bashantkushumakar\* or Basantakusumakar\* or Bashantakushumakar\* or Vijayasaradi\* or Vijayasharadi\* or Vijaysaradi\* or Vijaysharadi\* or Bijayasaradi\* or Bijayasharadi\* or Bijaysaradi\* or Bijaysharadi\* or Vyoshadi\* or Vyosadi\* or Byoshadi\* or Byosadi\*) OR (Ayush 82 or Ayush-82 or Cogent DB or Diabecon or "D 400" or "D-400" or GS4 or Gurmar or Hyponid or Inolter or "M 93" or "M-93" or "MA 471" or "MA-471" or Nosulin or "Pancreas Tonic"))

#3 ALL= ("Randomized controlled trial" OR "controlled clinical trial" OR "clinical trial" OR "clinical trials" OR placebos OR "random allocation" OR "double-blind method" OR "single-blind method" OR "cross-over studies" OR ((random\$ or control\$ or clinical\$) adj3 (trial\$ or stud\$)) OR (random\$ adj3 allocat\$) OR placebo\$ OR ((singl\$ or doubl\$ or trebl\$ or tripl\$) adj (blind\$ or mask\$)) OR (crossover\$ or (cross adj over\$)))

#1 AND #2 AND #3

**Cochrane Central Register of Controlled Trials (CENTRAL) (1996-16 January 2021): 9442 records**

#1 MeSH descriptor: [Diabetes mellitus, type 2] explode all trees and with qualifier(s): [diagnosis - DI]



- #2 Diabet\* in Trials
- #3 (NIDDM or T2DM or T2D) in Trials
- #4 Ketosis resistant diabete or ketosis resistant diabetic or stable diabete or stable diabetic in Trials
- #5 ((Non-insulin\* or non insulin\* or noninsulin\*) adj3 depend\* adj3 (diabete\* or diabetic\*))
- #6 ((Late or maturit\* or adult\* or slow\*) adj3 onset\* adj3 (diabete\* or diabetic\*))
- #7 Prameh\* in Trials
- #8 Madhumeh\* in Trials
- #9 #1 OR #2 OR #3 OR #4 OR #5 OR #6 OR #7 OR #8 in Trials
- #10 MeSH descriptor: [Diabetes mellitus, type 1] explode all trees and with qualifier(s): [diagnosis - DI]
- #11 Diabet\* insipidus in Trials
- #12 #10 OR #11 in Trials
- #13 #9 NOT #12
- #14 MeSH descriptor: [Medicine, traditional] explode all trees
- #15 MeSH descriptor: [Medicine, Ayurvedic] explode all trees
- #16 MeSH descriptor: [Complementary therapies] explode all trees
- #17 MeSH descriptor: [Plants, medicinal] explode all trees
- #18 MeSH descriptor: [Phytotherapy] explode all trees
- #19 MeSH descriptor: [Ethnobotany] explode all trees
- #20 MeSH descriptor: [Ethnopharmacology] explode all trees
- #21 (Ethnobotan\*):ti,ab,kw (Word variations have been searched)
- #22 (Ethnopharmacolog\*):ti,ab,kw (Word variations have been searched) in Trials
- #23 MeSH descriptor: [Aloe] explode all trees
- #24 (Ezadirachta):ti,ab,kw (Word variations have been searched) in Trials
- #25 ("Aegle"):ti,ab,kw (Word variations have been searched) in Trials
- #26 ("Artocarpus"):ti,ab,kw (Word variations have been searched)
- #27 (Butea\*):ti,ab,kw (Word variations have been searched)
- #28 MeSH descriptor: [Cassia] explode all trees
- #29 ("Cassia"):ti,ab,kw (Word variations have been searched) in Trials
- #30 ("Cinnamomum"):ti,ab,kw (Word variations have been searched)
- #31 (Cinnamomum zeylanicum):ti,ab,kw (Word variations have been searched)
- #32 ("Cucurbita"):ti,ab,kw (Word variations have been searched)
- #33 (Curcuma):ti,ab,kw (Word variations have been searched)
- #34 MeSH descriptor: [Trigonella] explode all trees
- #35 MeSH descriptor: [Ficus] explode all trees
- #36 MeSH descriptor: [Garlic] explode all trees
- #37 MeSH descriptor: [Ginger] explode all trees
- #38 MeSH descriptor: [Zingiberales] explode all trees
- #39 MeSH descriptor: [Gymnema] explode all trees
- #40 ("Gymnema sylvestre"):ti,ab,kw (Word variations have been searched)
- #41 ("Ipomoea batatas"):ti,ab,kw (Word variations have been searched)
- #42 ("Momordica charantia"):ti,ab,kw (Word variations have been searched)
- #43 (Murraya):ti,ab,kw (Word variations have been searched)
- #44 ("Nigella sativa"):ti,ab,kw (Word variations have been searched)
- #45 ("Ocimum sanctum"):ti,ab,kw (Word variations have been searched)
- #46 MeSH descriptor: [Onions] explode all trees
- #47 MeSH descriptor: [Allium] explode all trees
- #48 ("Piper"):ti,ab,kw (Word variations have been searched)
- #49 MeSH descriptor: [Tinospora] explode all trees
- #50 ("Tinospora"):ti,ab,kw (Word variations have been searched)
- #51 ("Tamarindus"):ti,ab,kw (Word variations have been searched)
- #52 ("Salacia") (Word variations have been searched)
- #53 (Lead):ti,ab,kw (Word variations have been searched)
- #54 (Tin):ti,ab,kw (Word variations have been searched)

#55 (Arogyavardhini\* or Arogyvardhini\* or Ayaskriti or Chandrakant\* or Chandraprabh\* or Devdarvarisht\* or Devdarvarist\* or Dhanvantar\* or Gokshuradi\* or Goksuradi\* or Jambudyarisht\* or Jambudyarist\* or Katakakhadiradi\* or Kathakakhadiradi\* or Kshirabal\* or Ksirabal\* or Lodhrasav\* or Mamajjak\* or Nag\* or Naag\* or Nimbadi\* or Nimadi\* or Nishamalak\* or Nisamalak\* or Nishamlak\* or Nisamlak\* or Nishakathakadi\* or Nisakathakadi\* or Phalatrikadi\* or Falatrikadi\* or Rajanyamalakadi\* or Rajanyamlakadi\* or Saptamrit\* or Shaptamrit\* or Saptargangyadi\* or Shilajit\* or Silajit\* or Shilajat\* or Silajat\* or Shilajeet\* or Silajeet\* or Siva\* or Shiva\* or Somnath\* or Shomnath\* or Triphal\* or Trifal\* or Trivang\* or Tribang\* or Vang\* or Bang\* or Vasant Kusumakar\* or Vashant Kushumakar\* or Vasanta Kusumakar\* or Vashanta Kushumakar\* or Vasantkusumakar\* or Vashantkushumakar\* or Vasantakusumakar\* or Vashantakushumakar\* or Basant Kusumakar\* or Bashant Kushumakar\* or Basanta Kusumakar\* or Bashanta Kushumakar\* or Basantkusumakar\* or Bashantkushumakar\* or Basantakusumakar\* or Bashantakushumakar\* or Vijayasaradi\* or Vijayasharadi\* or Vijaysaradi\* or Vijaysharadi\* or Bijayasaradi\* or Bijayasharadi\* or Bijaysaradi\* or Bijaysharadi\* or Vyoshadi\* or Vyosadi\* or Byoshadi\* or Byosadi\*) (Word variations have been searched)

#56 (Ayush 82 or Ayush-82 or Cogent DB or Diabecon or D 400 or D-400 or GS4 or Gurmar or Hyponidd or Inolter or M 93 or M-93 or MA 471 or MA-471 or Nosulin or Pancreas Tonic) (Word variations have been searched)

#57 #14 OR #15 OR #16 OR #17 OR #18 OR #19 OR #20 OR #21 OR #22 in Trials

#58 #23 OR #24 OR #25 OR #26 OR #27 OR #28 OR #29 OR #30 OR 29 #32

#59 #57 OR #58

#60 #33 OR #34 OR #35 OR #36 OR #37 OR #38 OR #39 OR #40 OR #41 OR #42

#61 #43 OR #44 OR #45 OR #46 OR #47 OR #48 OR #49 OR #50 OR #51 OR #52

#62 #60 OR #61

#63 #53 OR #54 OR #55 OR #56

#64 #59 OR #62 OR #63

#65 #13 AND #64

#### **Allied and Complementary Medicine Database (AMED) (Ovid) (1985-16 January 2021): 474 records**

1. exp Diabetes mellitus type 2/
2. (Type\* adj3 ("2" or "II" or two\*) adj3 (diabete\* or diabetic\*)).tw.
3. ((Late or maturit\* or adult\* or slow\*) adj3 onset\* adj3 (diabete\* or diabetic\*)).tw.
4. ((Ketosis-resistant\* or stable\*) adj3 (diabete\* or diabetic\*)).tw.
5. ((Non-insulin\* or non insulin\* or noninsulin\*) adj3 depend\* adj3 (diabete\* or diabetic\*)).tw.
6. (NIDDM or T2DM or T2D).tw.
7. Prameha.mp.
8. Madhumeh\*.mp.
9. or/1-8
10. exp Ayurvedic medicine/
11. Ayurved\*.tw,ti,ab.
12. exp Traditional medicine/
13. exp Complementary medicine/
14. ((Plant\* or herb\* or medicin\* or drug\* or therap\* or intervention\* or extract\* or formulation\* or preparation\* or supplement\*) adj6 (Ayurved\* or Hindu or Indian)).tw,ti,ab.
15. exp Ethnopharmacology/
16. Ethnobotany.mp.
17. (Ethnobotan\* or ethno botan\* or ethnopharmacolog\* or ethno pharmacolog\*).tw,ti,ab.
18. exp Phytotherapy/
19. (Phytotherap\* or phyto therap\*).tw,ti,ab.
20. Acanthaceae.mp.
21. Aegle.mp.
22. exp Aloe/

23. exp Artocarpus/
24. exp Azadirachta/
25. Butea.mp.
26. Cassia.mp.
27. Catharanthus.mp.
28. exp Cinnamomum/
29. Cinnamomum zeylanicum.mp.
30. Clerodendrum.mp.
31. Cucurbitaceae.mp.
32. exp Curcuma/
33. exp Cyamopsis/
34. exp Ficus/
35. Garlic.mp.
36. exp Zingiber officinale/
37. exp Allium sativum/
38. Gymnema.mp.
39. Gymnema sylvestre.mp.
40. exp Ipomoea/
41. exp Ipomoea/ or Ipomoea batatas.mp.
42. exp Momordica charantia/
43. exp Momordica/
44. Curry.mp.
45. Murraya koenigii.mp.
46. exp Nigella sativa/
47. Ocimum sanctum.mp.
48. Onions.mp.
49. exp Allium cepa/
50. exp Phyllanthus/
51. Emblic.mp.
52. Amla.mp.
53. Myrobalan.mp.
54. exp Piper/
55. Piper longum.mp.
56. Plantago.mp.
57. Psyllium.mp.
58. Pterocarpus.mp.
59. exp Punicaceae/
60. Salacia.mp.
61. Syzgium.mp.
62. Tamarindus.mp.
63. Tinospora.mp.
64. Tinospora cordifolia.mp.
65. Guduchi.mp.
66. exp Trigonella/
67. Fenugreek.mp.
68. exp Lead/
69. exp Tin/
70. (Lead or Tin or Black bitumen or Black asphalt\*).tw,ab,ti.
71. (Aegle marmelos or Crateva marmelos or Allium cepa or Allium sativum or Aloe vera or Artocarpus heterophyllus or Azadirachta indica or Melia azadirachta or Butea monosperma or Cassia auriculata or Catharanthus roseus or Vinca rosea or Cinnamomum aromaticum or Cinnamomum cassia or Cinnamomum tamala or Cinnamomum verum or Cinnamomum zeylanicum or Clerodendrum phlomides or Coccinia grandis or Coccinia cordifolia or Coccinia indica or Curcuma longa or Cyamopsis tetragonoloba or Emblica officinalis or Phyllanthus emblica or Enicostemma axillare or Enicostemma littorale or Ficus carica or Gymnema

lactiferum or Gymnema sylvestre or Hygrophila schulli or Asteracantha longifolia or Ipomoea batatas or Momordica charantia or Murraya koenigii or Nigella sativa or Ocimum tenuiflorum or Ocimum sanctum or Phyllanthus amarus or Phyllanthus niruri or Piper longum or Plantago arenaria or Plantago psyllium or Pterocarpus marsupium or Pterocarpus santalinus or Punica granatum or Salacia chinensis or Salacia reticulata or Solanum torvum or Syzygium cumini or Eugenia jambolana or Syzygium jambolanum or Syzygium jambos or Eugenia jambos or Tamarindus indica or Tinospora cordifolia or Trigonella foenum-graecum or Zingiber officinale).tw,ti,ab.

72. (Arogyavardhini\* or Arogyavardhini\* or Ayaskriti or Chandrakant\* or Chandraprabh\* or Devdarvarisht\* or Devdarvarist\* or Dhanvantar\* or Gokshuradi\* or Goksuradi\* or Jambudaryisht\* or Jambudaryist\* or Katakakhadiradi\* or Kathakakhadiradi\* or Kshirabal\* or Ksirabal\* or Lodhrasav\* or Mamajjak\* or Nag\* or Naag\* or Nimbadi\* or Nimadi\* or Nishamalak\* or Nisamalak\* or Nishamlak\* or Nisamlak\* or Nishakathakadi\* or Nisakathakadi\* or Phalatrikadi\* or Falatrikadi\* or Rajanyamalakadi\* or Rajanyamlakadi\* or Saptamrit\* or Shaptamrit\* or Saptargangyadi\* or Shilajit\* or Silajit\* or Shilajat\* or Silajat\* or Shilajeet\* or Silajeet\* or Siva\* or Shiva\* or Somnath\* or Shomnath\* or Triphal\* or Trifal\* or Trivang\* or Tribang\* or Vang\* or Bang\* or Vasant Kusumakar\* or Vashant Kushumakar\* or Vasanta Kusumakar\* or Vashanta Kushumakar\* or Vasantkusumakar\* or Vashantkushumakar\* or Vasantakusumakar\* or Vashantakushumakar\* or Basant Kusumakar\* or Bashant Kushumakar\* or Basanta Kusumakar\* or Bashanta Kushumakar\* or Basantkusumakar\* or Bashantkushumakar\* or Basantakusumakar\* or Bashantakushumakar\* or Vijayasaradi\* or Vijayasharadi\* or Vijaysaradi\* or Vijayasharadi\* or Bijayasaradi\* or Bijayasharadi\* or Bijaysaradi\* or Bijayasharadi\* or Vyoshadi\* or Vyosadi\* or Byoshadi\* or Byosadi\*).tw,ti,ab.

73. (Ayush 82 or Ayush-82 or Cogent DB or Diabecon or D 400 or D-400 or GS4 or Gurmar or Hyponidd or Inolter or M 93 or M-93 or MA 471 or MA-471 or Nosulin or Pancreas Tonic).tw,ti,ab.

74. or/10-73

75. 9 and 74

Search strategy included only disease and treatment domains. Study design domain was removed.

### **International Pharmaceutical Abstracts (Ovid) (1970-16 January 2021): 286 records**

1. Diabetes mellitus.mp. [mp=title, subject heading word, registry word, abstract, trade name/generic name]
2. (Type\* adj3 ("2" or "II" or two\*) adj3 (diabete\* or diabetic\*)).tw.
3. ((Late or maturit\* or adult\* or slow\*) adj3 onset\* adj3 (diabete\* or diabetic\*)).tw.
4. ((Ketosis-resistant\* or stable\*) adj3 (diabete\* or diabetic\*)).tw.
5. ((Non-insulin\* or non insulin\* or noninsulin\*) adj3 depend\* adj3 (diabete\* or diabetic\*)).tw.
6. (NIDDM or T2DM or T2D).tw.
7. Prameh\*.mp. [mp=title, subject heading word, registry word, abstract, trade name/generic name]
8. Madhume\*.mp. [mp=title, subject heading word, registry word, abstract, trade name/generic name]
9. 1 or 2 or 3 or 4 or 5 or 6 or 7 or 8
10. Ayurvedic medicine.mp.
11. Ayurved\*.tw.
12. Traditional medicine.mp.
13. Complementary medicine.mp. [mp=title, subject heading word, registry word, abstract, trade name/generic name]
14. ((Plant\* or herb\* or medicin\* or drug\* or therap\* or intervention\* or extract\* or formulation\* or preparation\* or supplement\*) adj6 (Ayurved\* or Hindu or Indian)).tw.
15. Medicinal plant.mp. [mp=title, subject heading word, registry word, abstract, trade name/generic name]

16. Plant extracts.mp.
17. Plants.mp.
18. ((Plant\* or herb\*) adj6 (medicin\* or drug\* or therap\* or intervention\* or extract\* or formulation\* or preparation\* or supplement\*)).tw.
19. Ethnobotany.mp.
20. Ethnopharmacology.mp.
21. (Ethnobotan\* or ethno botan\* or ethnopharmacolog\* or ethno pharmacolog\*).tw.
22. Phytotherapy.mp.
23. (Phytotherap\* or phyto therap\*).tw.
24. Acanthaceae.mp.
25. Aegle.mp.
26. Aloe.mp.
27. Artocarpus.mp.
28. Azadirachta.mp.
29. Butea.mp.
30. Cassia.mp.
31. Cinnamomum.mp.
32. Cinnamomum aromaticum.mp. [mp=title, subject heading word, registry word, abstract, trade name/generic name]
33. Cinnamomum zeylanicum.mp.
34. Clerodendrum.mp.
35. Cucurbitaceae.mp.
36. Curcuma.mp.
37. Cyamopsis.mp. [mp=title, subject heading word, registry word, abstract, trade name/generic name]
38. Ficus.mp.
39. Garlic.mp.
40. Ginger.mp.
41. Gymnema.mp.
42. Gymnema sylvestre.mp. [mp=title, subject heading word, registry word, abstract, trade name/generic name]
43. Ipomoea batatas.mp.
44. Momordica charantia.mp.
45. Murraya.mp.
46. Nigella sativa.mp.
47. Ocimum sanctum.mp.
48. Onions.mp.
49. Phyllanthus.mp. [mp=title, subject heading word, registry word, abstract, trade name/generic name]
50. Phyllanthus emblica.mp. [mp=title, subject heading word, registry word, abstract, trade name/generic name]
51. Piper.mp.
52. Plantago.mp.
53. Psyllium.mp.
54. Pterocarpus.mp.
55. Punicaceae.mp. [mp=title, subject heading word, registry word, abstract, trade name/generic name]
56. Salacia.mp.
57. Solanum.mp.
58. Syzygium.mp.
59. Tamarindus.mp.
60. Tinospora.mp.
61. Trigonella.mp.
62. Lead.mp.
63. Tin.mp.

64. (Aegle marmelos or Crateva marmelos or Allium cepa or Allium sativum or Aloe vera or Artocarpus heterophyllus or Azadirachta indica or Melia azadirachta or Butea monosperma or Cassia auriculata or Catharanthus roseus or Vinca rosea or Cinnamomum aromaticum or Cinnamomum cassia or Cinnamomum tamala or Cinnamomum verum or Cinnamomum zeylanicum or Clerodendrum phlomides or Coccinia grandis or Coccinia cordifolia or Coccinia indica or Curcuma longa or Cyamopsis tetragonoloba or Emblica officinalis or Phyllanthus emblica or Enicostemma axillare or Enicostemma littorale or Ficus carica or Gymnema lactiferum or Gymnema sylvestre or Hygrophila schulli or Asteracantha longifolia or Ipomoea batatas or Momordica charantia or Murraya koenigii or Nigella sativa or Ocimum tenuiflorum or Ocimum sanctum or Phyllanthus amarus or Phyllanthus niruri or Piper longum or Plantago arenaria or Plantago psyllium or Pterocarpus marsupium or Pterocarpus santalinus or Punica granatum or Salacia chinensis or Salacia reticulata or Solanum torvum or Syzygium cumini or Eugenia jambolana or Syzygium jambolanum or Syzygium jambos or Eugenia jambos or Tamarindus indica or Tinospora cordifolia or Trigonella foenum-graecum or Zingiber officinale).tw.

65. (Lead or Tin or Black bitumen or Black asphalt\*).tw.

66. (Arogyavardhini\* or Arogyavardhini\* or Ayaskriti or Chandrakant\* or Chandraprabh\* or Devdarvarisht\* or Devdarvarist\* or Dhanvantar\* or Gokshuradi\* or Goksuradi\* or Jambudaryisht\* or Jambudaryist\* or Katakakhadiradi\* or Kathakakhadiradi\* or Kshirabal\* or Ksirabal\* or Lodhrasav\* or Mamajjak\* or Nag\* or Naag\* or Nimbadi\* or Nimadi\* or Nishamalak\* or Nisamalak\* or Nishamlak\* or Nisamlak\* or Nishakathakadi\* or Nisakathakadi\* or Phalatrikadi\* or Falatrikadi\* or Rajanyamalakadi\* or Rajanyamlakadi\* or Saptamrit\* or Shaptamrit\* or Saptargangyadi\* or Shilajit\* or Silajit\* or Shilajat\* or Silajat\* or Shilajeet\* or Silajeet\* or Siva\* or Shiva\* or Somnath\* or Shomnath\* or Triphal\* or Trifal\* or Trivang\* or Tribang\* or Vang\* or Bang\* or Vasant Kusumakar\* or Vashant Kushumakar\* or Vasanta Kusumakar\* or Vashanta Kushumakar\* or Vasantkusumakar\* or Vashantkushumakar\* or Vasantakusumakar\* or Vashantakushumakar\* or Basant Kusumakar\* or Bashant Kushumakar\* or Basanta Kusumakar\* or Bashanta Kushumakar\* or Basantkusumakar\* or Bashantkushumakar\* or Basantakusumakar\* or Bashantakushumakar\* or Vijayasaradi\* or Vijayasharadi\* or Vijaysaradi\* or Vijaysharadi\* or Bijayasaradi\* or Bijayasharadi\* or Bijaysaradi\* or Bijaysharadi\* or Vyoshadi\* or Vyosadi\* or Byoshadi\* or Byosadi\*).tw.

67. (Ayush 82 or Ayush-82 or Cogent DB or Diabecon or D 400 or D-400 or GS4 or Gurmar or Hyponidd or Inolter or M 93 or M-93 or MA 471 or MA-471 or Nosulin or Pancreas Tonic).tw.

68. 10 or 11 or 12 or 13 or 14 or 15 or 16 or 17 or 18 or 19 or 20 or 21 or 22 or 23 or 24 or 25 or 26 or 27 or 28 or 29 or 30 or 31 or 32 or 33 or 34 or 35 or 36 or 37 or 38 or 39 or 40 or 41 or 42 or 43 or 44 or 45 or 46 or 47 or 48 or 49 or 50 or 51 or 52 or 53 or 54 or 55 or 56 or 57 or 58 or 59 or 60 or 61 or 62 or 63 or 64 or 65 or 66 or 67

69. Randomised controlled trial.mp.

70. Random allocation.mp.

71. Double-blind method.mp.

72. Single-blind method.mp.

73. Cross-over studies.mp.

74. ((Random\$ or control\$ or clinical\$) adj3 (trial\$ or stud\$)).tw.

75. (Random\$ adj3 allocat\$).tw.

76. Placebo\$.tw.

77. ((Singl\$ or doubl\$ or trebl\$ or tripl\$) adj (blind\$ or mask\$)).tw.

78. (Crossover\$ or (cross adj over\$)).tw.

79. 69 or 70 or 71 or 72 or 73 or 74 or 75 or 76 or 77 or 78

80. 9 and 68 and 79

**Turning Research Into Practice (TRIP) (1997-16 January 2021): 186 records**

(Diabet\* OR NIDDM OR T2DM OR T2D OR Prameh\* OR Madhumeh\*) AND Ayurved\*

**AYUSH Research Portal (16 January 2021): 292 records**

Searched with AYUSH terminology -> Selected medical system - Ayurveda -> Selected disease from the list –  
Madhumeha (283 records)  
Madhumeha – (9 records)

**Digital Helpline for Ayurveda Research Articles (DHARA) (16 January 2021): 1230 records**

Single search terms were used.

Diabetes (662 records)

Diabetic (436 records)

Diabetics (30 records)

NIDDM (15 records)

T2DM (3 records)

T2D (3 records)

Madhumeha (31 records)

Prameha (50 records)

**A Bibliography of Indian medicine (ABIM) (16 January 2021): 3015 records**

Single search terms were used.

Diabetes (1404 records)

Diabetic (1404 records)

Diabetics (23 records)

NIDDM (29 records)

T2DM (0 records)

T2D (0 records)

Madhumeha (113 records)

Prameha (42 records)

**CAM-QUEST (16 January 2021): 29 records**

Selected disease pattern - metabolic disorders -> Selected disease - diabetes mellitus ->  
Selected therapy - Ayurveda

**Directory of Open Access Journals (16 January 2021): 191 records**

Three different searches were run.

Diabet\* AND Ayurved\* [All fields] (171 records)

Prameha [All fields] (11 records)

Madhumeha [All fields] (9 records)

**EthOS (16 January 2021): 18 records**

Ayurveda [any word] OR Ayurvedic [any word]

**OpenGrey (16 January 2021): 22 records**

Ayurved\*

**ProQuest Dissertations and Theses (16 January 2021): 400 records**

Three different searches were run.

Ti(Diabet\* OR NIDDM OR T2DM OR T2D) AND Ayurved\* (111 records)

Prameh\* (165 records)

Madhumeh\* (124 records)

## **Appendix S2: Excluded studies with reasons for exclusion.**

### **Ineligible participants (includes impossible to extract data on T2DM participants) (n=1)**

1. Hsu P, Pan FF, Hsieh C. mclRBP-19 of bitter melon peptide effectively regulates diabetes mellitus (DM) patients' blood sugar levels. *Nutrients*. 2020;12(5):1252.

### **Ineligible interventions (includes unclear interventions) (n=8)**

1. Mohan V. Evaluation of D-400 (Diabecon) as anti-diabetic agent: A double blind placebo controlled trial in NIDDM patients with secondary failure to oral drugs. *Indian Journal of Clinical Practice*. 1998;8(9):18-21.
2. Elder C, Aickin M, Bauer V, Cairns J, Vuckovic N. Randomized trial of a whole-system Ayurvedic protocol for type 2 diabetes. *Altern Ther Health Med*. 2006;12(5):24-30.
3. Yin J, Xing H, Ye J. Efficacy of berberine in patients with type 2 diabetes mellitus. *Metabolism*. 2008;57(5):712-7.
4. Sharma RK, Patki PS. Double-blind, placebo-controlled clinical evaluation of an Ayurvedic formulation (GlucCare capsules) in non-insulin dependent diabetes mellitus. *J Ayurveda Integr Med*. 2010;1(1):45-51.
5. Agrawal RP, Goyal S, Chopra A, Jain S, Agarwal V, Khatri MP, *et al*. A randomized placebo controlled trial of herbal medicine (Sugaradik) in the treatment of type 2 diabetes. *Indian Medical Gazette*. 2014;148(4):142-8.
6. Kurian GA, Manjusha V, Nair SS, Varghese T, Padikkala J. Short-term effect of G-400, polyherbal formulation in the management of hyperglycemia and hyperlipidemia conditions in patients with type 2 diabetes mellitus. *Nutrition*. 2014;30(10):1158-64.
7. Mirfeizi M, Tourzani ZM, Mirfeizi SZ, Jafarabadi MA, Rezvani HR, Afzali M. Controlling type 2 diabetes mellitus with herbal medicines: A triple-blind randomized clinical trial of efficacy and safety. *J Diabetes*. 2016;8(5):647-56.
8. Venkatesan H, Karthi SA. Hypoglycaemic effect of alcoholic extracts of the leaves of *Abroma augusta* and *Gymnema sylvestre* plants in type II diabetes mellitus patients. *Indian Journal of Public Health Research and Development*. 2020;11(7):293-9.

### **Ineligible outcomes (includes inadequate data and/or timings) (n=19)**

1. Khan AK, Akhtar S, Mahtab H. Treatment of diabetes mellitus with *Coccinia indica*. *Br Med J*. 1980;280(6220):1044.
2. Niemi MK, Keinänen-Kiukaanniemi SM, Salmela PI. Long-term effects of guar gum and microcrystalline cellulose on glycaemic control and serum lipids in type 2 diabetes. *Eur J Clin Pharmacol*. 1988;34(4):427-9.
3. Lalor BC, Bhatnagar D, Winocour PH, Ishola M, Arrol S, Brading M, *et al*. Placebo-controlled trial of the effects of guar gum and metformin on fasting blood glucose and serum lipids in obese, type 2 diabetic patients. *Diabet Med*. 1990;7(3):242-5.
4. Agrawal P, Rai V, Singh RB. Randomized placebo-controlled, single blind trial of holy basil leaves in patients with noninsulin-dependent diabetes mellitus. *Int J Clin Pharmacol Ther*. 1996;34(9):406-9.
5. Anderson JW, Allgood LD, Turner J, Oeltgen PR, Daggy BP. Effects of psyllium on glucose and serum lipid responses in men with type 2 diabetes and hypercholesterolemia. *Am J Clin Nutr*. 1999;70(4):466-73.
6. Yadav RK, Mishra R, Chhipa RP, Audichya KC. Clinical trial of an indigenous compound drug Nishaamalki in the management of madhumeha vis-a-vis diabetes mellitus. *Anc Sci Life*. 2001;21(1):18-24.



7. Arora D, Kumar M, Dubey SD, Sings U. Immunomodulating effects of rasayana drugs in diabetics: A clinical study. *Anc Sci Life*. 2002;22(2):42-8.
8. Ludvik BH, Mahdjoobian K, Waldhaeusl W, Hofer A, Prager R, Kautzky-Willer A, *et al*. The effect of *Ipomoea batatas* (caiao) on glucose metabolism and serum cholesterol in patients with type 2 diabetes: A randomized study. *Diabetes Care*. 2002;25(1):239-40.
9. John AJ, Cherian R, Subhash HS, Cherian AM. Evaluation of the efficacy of bitter gourd (*Momordica charantia*) as an oral hypoglycemic agent: A randomized controlled clinical trial. *Indian J Physiol Pharmacol*. 2003;47(3):363-5.
10. Jayawardena MH, de Alwis NM, Hettigoda V, Fernando DJ. A double blind randomized placebo controlled cross over study of a herbal preparation containing *Salacia reticulata* in the treatment of type 2 diabetes. *J Ethnopharmacol*. 2005;97(2):215-8.
11. Ryu OH, Lee J, Lee KW, Kim HY, Seo JA, Kim SG, *et al*. Effects of green tea consumption on inflammation, insulin resistance and pulse wave velocity in type 2 diabetes patients. *Diabetes Res Clin Pract*. 2006;71(3):356-8.
12. Inayat-ur-Rahman, Malik SA, Bashir M, Khan R, Iqbal M. Serum sialic acid changes in non-insulin-dependant diabetes mellitus (NIDDM) patients following bitter melon (*Momordica charantia*) and rosiglitazone (Avandia) treatment. *Phytomedicine*. 2009;16(5):401-5.
13. Ahmed F, Huded S, Urooj A. Antihyperglycemic activity of *Ficus racemosa* bark extract in type 2 diabetic individuals. *J Diabetes*. 2011;3(4):318-9.
14. Amarnath S, Shukla HM. Single blind placebo controlled clinical evaluation of Mamajjaka Ghanvati in prameha with special reference to diabetes mellitus. *Journal of Ayurveda and Holistic Medicine*. 2013;1(5):11-9.
15. Jani DK. Clinical effect of supplementation of *Solanum nigrum* in diabetic individuals. *International Journal of Pharmacy and Integrated Life Sciences*. 2014;2(4):76-84.
16. Behzadi AA, Kalalian-Moghaddam H, Ahmadi AH. Effects of *Urtica dioica* supplementation on blood lipids, hepatic enzymes and nitric oxide levels in type 2 diabetic patients: A double blind, randomized clinical trial. *Avicenna J Phytomed*. 2016;6(6):686-95.
17. Pachaghare M. Randomized open clinical study of Charakokta Mutrasangrahnaya Mahakashay with special reference to madhumeh i.e. diabetes mellitus. *Deerghayu International*. 2016;32-02(126):254-8.
18. Sharma SD, Masand S, Sharma GD, Chaudhary V, Sharma SD. A randomized clinical study to evaluate the efficacy of an Ayurvedic formulation in the management of madhumeha with special reference to diabetes mellitus. *International Journal of Research in Ayurveda and Pharmacy*. 2016;7(6):33-8.
19. Hadi S, Mirmiran P, Daryabeygi-Khotbesara R, Hadi V. Effect of *Nigella sativa* oil extract on inflammatory cytokine response and oxidative stress among people with type 2 diabetes mellitus: A randomized, double-blind, placebo controlled trial. *Progress in Nutrition*. 2018;20(1-S):127-33.

#### **Ineligible study designs (n=34)**

1. Singh TN, Upadhyay BN, Tewari CM, Tripathi SN. Management of diabetes mellitus (prameha) with *Inula racemosa* and *Cinnamomum tamala*. *Anc Sci Life*. 1985;5(1):9-16.
2. Kohli KR, Naik S, Tripathi R, Zarapkar M, Kenkare D. Karnim: A herbal formulation in non-insulin dependent diabetes mellitus. *The Journal of General Medicine*. 1993;6(1):47-52.
3. Kohli KR, Singh RH. A clinical trial of jambu (*Eugenia jambolana*) in non-insulin dependant diabetes mellitus. *Journal of Research in Ayurveda and Siddha*. 1993;14(3-4):89-97.
4. Kamble SM, Jyotishi GS, Kamalakar PL, Vaidya SM. Efficacy of *Coccinia indica* W. and A. in diabetes mellitus. *Journal of Research in Ayurveda and Siddha*. 1996;17(1-2):77-84.

5. Sharma RD, Sarkar A, Hazra DK, Mishra B, Singh JB, Sharma SK, *et al.* Use of fenugreek seed powder in the management of non-insulin dependent diabetes mellitus. *Nutr Res.* 1996;16(8):1331-9.
6. Sharma RD, Sarkar A, Hazra DK, Misra B, Singh JB, Maheshwari BB, *et al.* Hypolipidaemic effect of fenugreek seeds: A chronic study in non-insulin dependent diabetic patients. *Phytother Res.* 1996;10(4):332-4.
7. Bordia A, Verma SK, Srivastava KC. Effect of ginger (*Zingiber officinale* Rosc.) and fenugreek (*Trigonella foenumgraecum* L.) on blood lipids, blood sugar and platelet aggregation in patients with coronary artery disease. *Prostaglandins Leukot Essent Fatty Acids.* 1997;56(5):379-84.
8. Chandra V, Aruna K. Glycaemic and cholesterolaemic effect of sprouted fenugreek on diabetic subjects. *The Indian Journal of Nutrition and Dietetics.* 1997;34(10):246-51.
9. Mehra PS, Singh RH. Clinical evaluation of the effect of Amrita-Pippali-Nimba Yoga in diabetes mellitus with special reference to the role of agni and ojas. *Journal of Research in Ayurveda and Siddha.* 2001;21(3-4):183-97.
10. Adhikari KS, Ojha JK, Dwivedi KN. A clinical study of Shilajatu Bijaka Yoga in ojomaha patients. *Journal of Research in Ayurveda and Siddha.* 2003;24(1-2):62-70.
11. Pandey AK, Singh RH. A study of the immune status in patients of diabetes mellitus and their management with certain naimittika rasayana drugs. *Journal of Research in Ayurveda and Siddha.* 2003;24(3-4):48-61.
12. Islas IL, Nuevo JJ, Saab NG, Guerra AF. Onion consumption as an adjuvant in glycemic control of type 2 diabetes. *Medicina Interna de Mexico.* 2005;21(1):44-7.
13. Andallu B, Ramya V. Anti-hyperglycemic, cholesterol-lowering and HDL-raising effects of cumin (*Cuminum cyminum*) seeds in type 2 diabetes. *Journal of Natural Remedies.* 2007;7(1):142-9.
14. Joshi A. Studies on the impact of phytochemical rich fruit supplementation amla *Embilica officinalis* in the management of diabetes mellitus and efficacy of interpersonal counselling on the knowledge and lifestyle related risk factors in type 2 diabetes mellitus [dissertation on the internet]. Baroda: Maharaja Sayajirao University of Baroda; 2008.
15. Mitra A. Preparation and effects of cheap salad oil in the management of type 2 rural Indian diabetics. *Journal of Human Ecology.* 2008;23(1):27-38.
16. Kochhar A, Sharma N, Sachdeva R. Effect of supplementation of tulsi (*Ocimum sanctum*) and neem (*Azadirachta indica*) leaf powder on diabetic symptoms, anthropometric parameters and blood pressure of non insulin dependent male diabetics. *Studies on Ethno-Medicine.* 2009;3(1):5-9.
17. Radha R, Amrithaveni M. Role of medicinal plant *Salacia reticulata* in the management of type II diabetic subjects. *Anc Sci Life.* 2009;29(1):14-6.
18. Sartore G, Reitano R, Barison A, Magnanini P, Cosma C, Burlina S, *et al.* The effects of psyllium on lipoproteins in type II diabetic patients. *Eur J Clin Nutr.* 2009;63(10):1269-71.
19. Kumar SN, Mani UV, Mani I. An open label study on the supplementation of *Gymnema sylvestre* in type 2 diabetics. *J Diet Suppl.* 2010;7(3):273-82.
20. Venugopal S, Iyer UM. Management of diabetic dyslipidemia with subatmospheric dehydrated barley grass powder. *International Journal of Green Pharmacy.* 2010;4(4):251-6.
21. Anas M, Mohsin M, Siddiqui M, Mannan A. Therapeutic evaluation of a polyherbal formulation in type 2 diabetes mellitus. *Indian Journal of Traditional Knowledge.* 2011;10(4):711-5.
22. Nath P, Dubey SD, Ojha JK. Study on ojah kshaya WSR to madhumeha hara dravyas in Samhitas. *Journal of Research in Ayurveda and Siddha.* 2011;32(3-4):87-100.
23. Tanna I, Chandola HM, Joshi JR. Clinical efficacy of Mehamudgara Vati in type 2 diabetes mellitus. *Ayu.* 2011;32(1):30-9.

24. Upadhyay BN, Gupta V. A clinical study on the effect of Rishyagandha (*Withania coagulans*) in the management of prameha (type II diabetes mellitus). *Ayu*. 2011;32(4):507-11.
25. Hoehn AN, Stockert AL. The effects of *Cinnamomum cassia* on blood glucose values are greater than those of dietary changes alone. *Nutr Metab Insights*. 2012;5:77–83.
26. Singh U, Kochhar A. Effect of supplementation of bael (*Aegle marmelos* L.) and nutrition counseling on blood glucose, lipid profile and blood pressure of non-insulin dependent diabetics. *Journal of Pharma Research*. 2012;1(2):1-6.
27. Kim HM, Kim J. The effects of green tea on obesity and type 2 diabetes. *Diabetes Metab J*. 2013;37(3):173-5.
28. Sharma P, Sharma AK, Dwivedi KN. Clinical study on antidiabetic activity of karanja (*Pongamia pinnata*). *International Journal of Pharmaceutical Research and Bio-Science*. 2013;2(5):438-51.
29. Tayyab F, Lal SS. Antidiabetic hypolipidemic and antioxidant activity of *Momordica charantia* on type-II diabetic patient in Allahabad India. *International Journal of Pharma and Bio Sciences*. 2013;4(4):932-40.
30. Choudhary M, Kochhar A, Sangha J. Hypoglycemic and hypolipidemic effect of *Aloe vera* L. in non-insulin dependent diabetics. *J Food Sci Technol*. 2014;51(1):90-6.
31. Mathew R, Radhakrishnan VN, Babu NS. Effect of Katakakhadiradi Kasaya in type 2 diabetes mellitus associated with hypercholesterolemia. *Aryavaidyan*. 2014;28(1):27-30.
32. Balavenkata KS, Bulusu S. A critical study of pramehahara effect of Dhaatri Nishe WSR to diabetes mellitus. *International Journal of Ayurvedic Medicine*. 2018;9(3):196-201.
33. Boston C, Wong N, Ganga T, Chandradatt K, Rosales J, Singh J, et al. Comparison and effectiveness of complementary and alternative medicine as against conventional medicine in the treatment and management of type 2 diabetes. *Journal of Complementary and Alternative Medical Research*. 2019;7(2):1-8.
34. Sehgal S, Huddar VG, Rao MV. Efficacy of prakriti specific herbal tea in diabetes: A randomized controlled trial. *International Journal of Ayurvedic Medicine*. 2020;11(3):524-35.

**Ineligible participants (includes impossible to extract data on T2DM participants)+ineligible study designs (n=7)**

1. Rajasekharan S, Tuli SN. Vijaysar (*Pterocarpus marsupium*) in the treatment of madhumeha (diabetes mellitus): A clinical trial. *Journal of Research Indian Medicine, Yoga and Homoeopathy*. 1976;11:9-14.
2. Shaw BP, Tripathy PC. Evaluation of Svarnamakshika (copper pyrites) as an oral hypoglycaemic agent (clinical trials). *Nagarjun*. 1980;23(1-9):195-7.
3. Mishra SK, Pandey SK, Sharma SH, Singh GD. Effect of Amalaki-Haridra on madhumeha. *Nagarjun*. 1983;26(1-5):105-7.
4. Chaube A, Nagraja TN, Dixit SK, Agrawal JK, Kumar M, Prakash B. A novel Ayurvedic anti diabetic medicine. *Anc Sci Life*. 1995;15(2):153-5.
5. Rajagopalan K, Sasidharan K. Evaluation of the clinical management of prameha roga (diabetes mellitus). *Aryavaidyan*. 2000;14(1):33-43.
6. Kanthi VG, Sarashetti RS, Bidari RC. Management of madhumeha (diabetes mellitus) with herbomineral compound preparations. *Journal of Research in Ayurveda and Siddha*. 2004;25(3-4):47-56.
7. Gaikwad S, Kadam DB, Pawar PS. Role of Ayurvedic treatment in the management of diabetes. *Aryavaidyan*. 2009;22(4):202-5.

**Ineligible interventions (includes unclear interventions)+ineligible study designs (n=4)**

1. Maji D, Singh AK. Clinical trial of D-400, a herbomineral preparation in diabetes mellitus. *Journal of the Diabetic Association of India*. 1995;35(1):1-4.

2. Mitra SK, Hemavathi TS, Mohan AR, Rajesha. Anti-diabetic effect of D-400, an Ayurvedic herbal preparation in non-insulin dependent diabetes mellitus patients. *The Antiseptic*. 1995;92(9):342-5.
3. Mitra SK, Sessaiah V, Agarwal JK, Maji D, Yajnik VH, Prasanna Kumar KM, *et al*. Multicentric trial of Diabecon (D-400): A herbomineral preparation on lipid profile in diabetes mellitus. *Int J Diabetes Dev Ctries*. 1996;16:87-9.
4. Geetha B, Shivananda N, Manjula S. Management of newly diagnosed type 2 diabetes by *Trigonella foenum-graecum*. *International Journal of Research in Ayurveda and Pharmacy*. 2011;2(4):1231-4.

**Ineligible outcomes (includes inadequate data and/or timings)+ineligible study designs (n=11)**

1. Ojha JK, Bajpai HS, Sharma PV. Hypoglycemic effect of *Pterocarpus marsupium* Roxb (vijaysar). *Journal of Research Indian Medicine, Yoga and Homoeopathy*. 1978;13(4):12-6.
2. Chandola HM, Tripathi SN, Udupa KN. Hypoglycaemic response of *C. tamala* in patients of maturity onset (insulin independent) diabetes. *Journal of Research in Ayurveda and Siddha*. 1980;1:275-90.
3. Chandola HM, Tripathi SN, Udupa KN. Effect of *C. tamala* on plasma insulin vis-à-vis blood sugar in patients of diabetes mellitus. *Journal of Research in Ayurveda and Siddha*. 1980;1(3):345-57.
4. Jain AK, Shaw BP. Effect of herbal compound on maturity onset diabetes. *Anc Sci Life*. 1987;7(1):12-6.
5. Kumar N, Kumar A. A clinical trial of M-93 compound in the management of madhumeha (diabetes mellitus). *Journal of Research in Ayurveda and Siddha*. 1995;16(3-4):102-7.
6. Nanda GC, Chopra KK, Sahu DP, Padhi MM. Nishamalaki in madhumeha (NIDDM): A clinical study. *Journal of Research in Ayurveda and Siddha*. 1998;19(1-2):34-40.
7. Kumar N, Kumar A, Sharma ML. Clinical evaluation of single and herbo-mineral compound drugs in the management of madhumeha. *Journal of Research in Ayurveda and Siddha*. 1999;20(1-2):1-9.
8. Mudra M, Ercan-Fang N, Zhong L, Furne J, Levitt M. Influence of mulberry leaf extract on the blood glucose and breath hydrogen response to ingestion of 75 g sucrose by type 2 diabetic and control subjects. *Diabetes Care*. 2007;30(5):1272-4.
9. Date KA, Dwivedi LK, Sharma RP, Rao KS. Comparative study of Ganesayagokta Havanasamagribhasma and Silabhrarasa with Madhumeharicurna with special reference to its anti-hyperglycemic effect. *Aryavaidyan*. 2014;28(1):47-51.
10. Kumari M, Jain S, Dave R. Babul (*Acacia nilotica*): A potential source of tannin and its suitability in management of type II diabetes. *Nutrition and Food Science*. 2014;44(2):119-26.
11. Kapoor S. Impact of indigenous food (Methi dana, Kale til and Kali jiri) on blood glucose level of middle aged NIDDM patients [dissertation on the internet]. Indore: Devi Ahilya Vishwavidyalaya; 2015.

**Ineligible participants (includes impossible to extract data on T2DM participants)+ineligible outcomes (includes inadequate data and/or timings)+ineligible study designs (n=3)**

1. Atique A, Iqbal M, Ghouse AK. Use of *Annona squamosa* and *Piper nigrum* against diabetes. *Fitoterapia*. 1985;56(3):190-2.
2. Fernando MR, Wickramasinghe SM, Thabrew MI, Ariyananda PL, Karunanayake EH. Effect of *Artocarpus heterophyllus* and *Asteracanthus longifolia* on glucose tolerance in normal human subjects and in maturity-onset diabetic patients. *J Ethnopharmacol*. 1991;31(3):277-82.

3. Karnick CR. A clinical trial of a composite herbal drugs in the treatment of diabetic mellitus (madhumeha). *Aryavaidyan*. 1991;5(1):36-46.

**Ineligible interventions (includes unclear interventions)+ineligible outcomes (includes inadequate data and/or timings)+ineligible study designs (n=1)**

1. Khan SK. South Asian and Chinese medical systems: Ayurveda and traditional Chinese medicine treatments for diabetes mellitus, type 2 [dissertation on the internet]. New York: City University of New York; 2006.

**Ineligible participants (includes impossible to extract data on T2DM participants)+ineligible comparators+ineligible outcomes (includes inadequate data and/or timings)+ineligible study designs (n=1)**

1. Shaw BP, Gupta S. A clinical study of bimbi (*Coccinia indica*) in the treatment of madhumeha (diabetes mellitus). *Nagarjun*. 1981;14(6):24-6.

**Full text unavailable (n=1)**

1. Bhimani S. Clinical study of efficacy of Glycoban cap in patients of non-insulin dependent diabetes (NIDDM) mellitus. *The Antiseptic*. 2005;102(2):71-5.

**Appendix S3: Potentially eligible ongoing RCTs.**

| <b>Trial registry number</b> | <b>Scientific study title</b>                                                                                                                                 | <b>Country</b> |
|------------------------------|---------------------------------------------------------------------------------------------------------------------------------------------------------------|----------------|
| CTRI/2015/03/005660          | A comparative clinical study to evaluate the efficacy of Phalendradhi Yogam with and without Yashada Bhasma in the management of madhumeha (type 2 DM)        | India          |
| CTRI/2015/06/005891          | A randomised, prospective single blind clinical trial of anti diabetic polyherbal formulation (DiaKure)                                                       | India          |
| CTRI/2017/05/008451          | Pharmaceutical development of trinshati and shashti puti Naga Bhasma and their comparative clinical efficacy in the management of madhumeha (type 2 diabetes) | India          |
| CTRI/2017/05/008461          | Open labelled, controlled, randomized evaluation of the effect of Dhatri Nisha Yoga in management of prameha vis a vis diabetes mellitus (type II)            | India          |
| CTRI/2017/08/009575          | Role of Vijaysaradi capsule in the management of insulin dependent type 2 diabetes: An open labelled standard controlled clinical trial                       | India          |
| CTRI/2018/04/013415          | Clinical evaluation of the effect of Phalatrikadi Kwath and Madhumeha-har Vati Kalpit Yoga in madhumeh (diabetes mellitus II)                                 | India          |
| CTRI/2018/09/015829          | A comparative pharmaceutico-analytical and clinical study of Indravati and Vangeshwara Rasa in madhumeha                                                      | India          |
| CTRI/2019/02/017474          | Efficacy and safety of <i>Curcuma longa</i> as an add-on therapy in type 2 diabetes mellitus: A randomized, double blind, placebo controlled trial            | India          |
| CTRI/2019/02/017500          | A randomised control trial for the mechanism of action of yoga and Ayurveda with yoga in type-2 diabetes mellitus                                             | India          |
| CTRI/2019/02/017609          | Randomized controlled clinical study on the efficacy of Vidangadi Lauha on sthula madhumeha with special reference to type II diabetes mellitus               | India          |
| CTRI/2019/02/017755          | A clinical study to evaluate the efficacy of pathya, shodhana, shamana and rasayana chikitsa in the management of madhumeha WSR to type II diabetes mellitus  | India          |

|                     |                                                                                                                                                                                                                                                                                                                                                                                                              |        |
|---------------------|--------------------------------------------------------------------------------------------------------------------------------------------------------------------------------------------------------------------------------------------------------------------------------------------------------------------------------------------------------------------------------------------------------------|--------|
| CTRI/2019/04/018729 | A comparative clinical study to evaluate the efficacy of Nyagrodhadi Churna and B-S Patra Ghana Vati in the management of madhumeha WSR type-2 diabetes mellitus                                                                                                                                                                                                                                             | India  |
| CTRI/2019/05/019370 | An open label double arm clinical trial to determine the efficacy of D 4 combination along with ongoing conventional medicine in managing diabetes mellitus (type 2)                                                                                                                                                                                                                                         | India  |
| CTRI/2019/05/019452 | A randomized, multi-center, open labeled, comparative, prospective clinical study to evaluate efficacy and safety of Yesaka liquid as an add-on therapy to oral hypoglycemic agent (OHA) in type 2 diabetic patients                                                                                                                                                                                         | India  |
| CTRI/2019/06/019636 | An open-label, prospective, observational, multiple-dose, controlled, two armed, relative study of bio active liquid curcumin 5mg/50ml (5 drops in 50 ml of water) of oral dose (TDS dose) along with conventional pharmaceutical treatment (only prescribed diabetic medicine) in diabetic, adult, human patients to evaluate the safety and efficacy                                                       | India  |
| CTRI/2020/01/023027 | A double blind randomised placebo controlled evaluation of adjuvant effect of Kimshukatvagadi Ghana capsule in prameha with special reference to diabetes mellitus type II                                                                                                                                                                                                                                   | India  |
| CTRI/2020/02/023118 | A comparative control clinico-biochemical study of Ayurvedic formulation in the patients of type 2 diabetes mellitus WSR madhumeha                                                                                                                                                                                                                                                                           | India  |
| CTRI/2020/03/023876 | An open label randomised clinical trial to determine the efficacy of Rohitakadi Churna along with Triphaladi granules in the management of madhumeha with special reference to diabetes mellitus (type 2)                                                                                                                                                                                                    | India  |
| CTRI/2020/06/025922 | Efficacy of vamana, virechana and basti followed by shamana in the management of sthula pramehi WSR to type 2 diabetes: An open labelled randomized standard controlled clinical trial                                                                                                                                                                                                                       | India  |
| CTRI/2020/07/026465 | Association study between sharir prakriti and type 2 diabetes (madhumeha) and its Ayurvedic management along with lifestyle modifications                                                                                                                                                                                                                                                                    | India  |
| CTRI/2020/10/028201 | An open labelled randomized controlled clinical study to evaluate the anti-hyperglycemic activity of novel Ayurvedic Choorna in the management of prameha vis-a-vis type 2 diabetes mellitus                                                                                                                                                                                                                 | India  |
| CTRI/2020/12/029806 | Study the effect of Nisha-amalaki (as an adjuvant drug) in uncontrolled type II diabetes mellitus: A pragmatic, randomized controlled trial                                                                                                                                                                                                                                                                  | India  |
| IRCT2016042717254N5 | The effects of green cardamom supplementation on blood glucose, lipids profile, oxidative stress, sirtuin-1 and irisin in type 2 diabetic patients: A study protocol for a randomized placebo-controlled clinical trial<br>The effects of green cardamom supplementation on blood pressure and endothelium function in type 2 diabetic patients: A study protocol for a randomized controlled clinical trial | Iran   |
| NCT03151837         | A randomized, double-blind, placebo-controlled trial to evaluate the hypoglycemic efficacy of greenyn <i>Momordica charantia</i> extracts in diabetic subjects                                                                                                                                                                                                                                               | Taiwan |
| NCT04023539         | Evaluation of the effect of <i>Cinnamomum zeylanicum</i> on glycemic levels of Mexican adult patients with type 2 diabetes at 3 months: Randomized clinical trial                                                                                                                                                                                                                                            | Mexico |
| NCT04259606         | Effect of Cassia Cinnamon on arterial stiffness parameters in patients with type 2 diabetes mellitus                                                                                                                                                                                                                                                                                                         | Mexico |

|                |                                                                                                                                                                                    |           |
|----------------|------------------------------------------------------------------------------------------------------------------------------------------------------------------------------------|-----------|
| RBR-2KKB6D     | Analysis of the effectiveness of cinnamon ( <i>Cinnamomum verum</i> ) in the reduction of glycemic and lipidic levels of adults with type 2 diabetes: A study protocol             | Brazil    |
| SLCTR/2017/010 | Effectiveness of <i>Cinnamomum zeylanicum</i> (Ceylon cinnamon) in lowering blood glucose in type 2 diabetes mellitus: A randomized double blind placebo controlled clinical trial | Sri Lanka |

## Appendix S4: Characteristics of included studies.

[illegible]



| Author and year                     | Country   | T2DM patients (duration of T2DM if existing cases [mean, years]) | Comorbidities/ complications of T2DM              | Participants /eligible arm (n) | Age (mean, years) | Female s (n) | HbA1c (mean, %) | FBG (mean, mg/dL) | Any commercial funding/other support |
|-------------------------------------|-----------|------------------------------------------------------------------|---------------------------------------------------|--------------------------------|-------------------|--------------|-----------------|-------------------|--------------------------------------|
| Sharma 2017                         | India     | Existing cases (NS)/on OAD                                       | Dyslipidemia                                      | A1=68?♂, A2=35?                | NS                | NS           | NS              | 163.4Ω            | Unclear                              |
| <b><i>Boswellia serrata</i></b>     |           |                                                                  |                                                   |                                |                   |              |                 |                   |                                      |
| Azadmehr 2014                       | Iran      | Existing cases (5.7)/on OAD                                      |                                                   | A1=37, A2=34                   | 51.1              | 29           | 7.3             | 156.5             | No                                   |
| Mehrzadi 2018                       | Iran      | Existing cases (11.1)/on OAD                                     |                                                   | A1=27, A2=29                   | 54.9              | 30           | 8.2             | 167.0             | No                                   |
| <b><i>Camellia sinensis</i></b>     |           |                                                                  |                                                   |                                |                   |              |                 |                   |                                      |
| MacKenzie 2007                      | US        | Existing cases (7.0Ω)/on OAD                                     |                                                   | A1=36♂, A2=18♂                 | 65.4Ω             | 28Ω          | 7.1Ω            | NS                | Yes?                                 |
| Mirzaei 2009                        | Iran      | Existing cases (5.7)/on OAD                                      |                                                   | A1=26, A2=46                   | 54.6              | 58?          | 7.7             | 170.4             | No                                   |
| Hsu 2011                            | Taiwan    | Existing cases (4.2Ω)/on OAD                                     | Obesity                                           | A1=40, A2=40                   | 51.4Ω             | 44Ω          | 8.4Ω            | 172.8Ω            | No                                   |
| Lasaita 2014                        | Lithuania | Existing cases (8.1Ω)/on OAD and/or insulin                      | Diabetic retinopathy, nephropathy, or neuropathy? | A1=83?, A2=84?                 | 57.0Ω             | NS           | 8.0Ω            | NS                | Yes?                                 |
| Liu 2014                            | Taiwan    | Existing cases (4.7Ω)/on OAD                                     | Dyslipidemia                                      | A1=46, A2=46                   | 54.3Ω             | 45Ω          | 7.6Ω            | 145.7Ω            | No                                   |
| Quezada-Fernandez 2019              | Mexico    | Existing cases (6.0Ω)/on OAD                                     |                                                   | A1=12, A2=13                   | 53.2Ω             | 10Ω          | 7.5Ω            | 169.0Ω            | Unclear                              |
| <b><i>Capparis spinosa</i></b>      |           |                                                                  |                                                   |                                |                   |              |                 |                   |                                      |
| Huseini 2013                        | Iran      | Existing cases (6.9Ω)/on OAD                                     |                                                   | A1=30, A2=30                   | 53.9Ω             | NS           | 8.3Ω            | 180.2Ω            | No                                   |
| <b><i>Cichorium intybus</i></b>     |           |                                                                  |                                                   |                                |                   |              |                 |                   |                                      |
| Chandra 2020                        | India     | Existing cases (4.6Ω)/on OAD                                     |                                                   | A1=56, A2=55                   | 47.0Ω             | 45Ω          | 8.6Ω            | 197.0Ω            | Yes                                  |
| <b><i>Cinnamomum aromaticum</i></b> |           |                                                                  |                                                   |                                |                   |              |                 |                   |                                      |
| Mang 2006                           | Germany   | Existing cases (7.0Ω)/on OAD                                     |                                                   | A1=40?, A2=39?                 | 63.3Ω             | 21Ω          | 6.8Ω            | 162.0Ω            | Yes                                  |
| Suppakitporn 2006                   | Thailand  | Existing cases (4.5)/on OAD                                      |                                                   | A1=20, A2=40                   | 59.2              | 32           | 8.1             | 149.3             | Unclear                              |
| Blevins 2007                        | US        | Existing cases (NS)/on OAD                                       |                                                   | A1=30, A2=30                   | 60.8Ω             | 29Ω          | 7.2Ω            | 138.8Ω            | No                                   |
| Crawford 2009                       | US\$      | Existing cases (NS)/on OAD and/or insulin                        |                                                   | A1=55, A2=54                   | 60.2              | 45           | 8.4             | NS                | No?                                  |
| Akilen 2010                         | UK\$      | Existing cases (5.8)/on OAD                                      |                                                   | A1=30, A2=28                   | 54.7              | 32           | 8.4             | 158.4             | Yes                                  |
| Wainstein 2011                      | Israel    | Existing cases (8.2)/on OAD                                      |                                                   | A1=29, A2=30                   | 63.1              | 24           | 7.6             | 155.0             | Unclear                              |
| Lu 2012                             | China     | Existing cases (NS)/on OAD?                                      |                                                   | A1=46?♂, A2=23?                | 60.4Ω             | 44           | 8.9Ω            | 174.6Ω            | Unclear                              |

[illegible]

| Author and year                       | Country   | T2DM patients (duration of T2DM if existing cases [mean, years]) | Comorbidities/ complications of T2DM | Participants /eligible arm (n) | Age (mean, years) | Female s (n) | HbA1c (mean, %) | FBG (mean, mg/dL) | Any commercial funding/other support |
|---------------------------------------|-----------|------------------------------------------------------------------|--------------------------------------|--------------------------------|-------------------|--------------|-----------------|-------------------|--------------------------------------|
| Jafari 2017                           | Iran      | Existing cases (NS)/on OAD                                       |                                      | A1=66♂, A2=33                  | 47.3Ω             | 62Ω          | 7.0Ω            | 166.6Ω            | Unclear                              |
| Hendre 2020                           | India     | Existing cases (NS)/on OAD                                       |                                      | A1=100, A2=100                 | NS                | NS           | NS              | 151               | No                                   |
| <b><i>Curcuma longa</i></b>           |           |                                                                  |                                      |                                |                   |              |                 |                   |                                      |
| Usharani 2008                         | India     | Existing cases (NS)/on OAD                                       |                                      | A1=24?, A2=24?                 | 52.6Ω             | 21Ω          | 7.9Ω            | 158.1Ω            | Yes                                  |
| Na 2013                               | China     | Existing cases (7.7Ω)/on OAD and/or insulin                      | Obesity                              | A1=55, A2=54                   | 55.1Ω             | 51Ω          | 7.7Ω            | 153.0Ω            | Unclear                              |
| Chuengsamarn 2014                     | Thailand  | Newly diagnosed/treatment naïve                                  |                                      | A1=120, A2=120                 | 59.4Ω             | 116Ω         | 7.0Ω            | 141.5Ω            | No                                   |
| Panahi 2017, Panahi 2018              | Iran      | Both (NS)                                                        |                                      | A1=61, A2=57                   | 42.0Ω             | 49Ω          | 7.5Ω            | 168.5Ω            | Yes                                  |
| Adab 2019                             | Iran      | Existing cases (NS)/on OAD                                       | Dyslipidemia                         | A1=40, A2=40                   | 55.2Ω             | 39Ω          | 6.9Ω            | 131.9Ω            | No                                   |
| Adibian 2019                          | Iran      | Existing cases (8.0Ω)/on OAD                                     |                                      | A1=25, A2=28                   | 59.0Ω             | 22Ω          | NS              | NS                | Unclear                              |
| Srinivasan 2019                       | India     | Existing cases (3.9Ω)/on OAD                                     |                                      | A1=69, A2=67                   | 50.6Ω             | 85Ω          | NS              | NS                | Yes                                  |
| de Sousa 2020                         | Brazil¥   | Existing cases (NS)/on OAD                                       |                                      | A1=47, A2=46                   | 62.6Ω             | 47Ω          | 7.9Ω            | 171.4Ω            | No                                   |
| <b><i>Cyamopsis tetragonoloba</i></b> |           |                                                                  |                                      |                                |                   |              |                 |                   |                                      |
| Uusitupa 1984                         | Finland   | Newly diagnosed/treatment naïve                                  |                                      | A1=10, A2=9                    | 62.0Ω             | 18           | NS              | 174.8Ω            | Unclear                              |
| Uusitupa 1989                         | Finland   | Existing cases (9.4)/on OAD                                      |                                      | A1=20, A2=19                   | 60.1              | 26           | 9.1             | 225.0             | Unclear                              |
| <b><i>Eclipta prostrata</i></b>       |           |                                                                  |                                      |                                |                   |              |                 |                   |                                      |
| Sazia 2015a, Sazia 2015b              | India     | Newly diagnosed/treatment naïve                                  |                                      | A1=24, A2=24, A3=24            | NS                | NS           | NS              | 127.1Ω            | No?                                  |
| <b><i>Elettaria cardamomum</i></b>    |           |                                                                  |                                      |                                |                   |              |                 |                   |                                      |
| Aghasi 2019                           | Iran      | Existing cases (7.7)/on OAD                                      |                                      | A1=41, A2=42                   | 53.6              | 39           | 8.0             | 157.0             | No?                                  |
| <b><i>Embllica officinalis</i></b>    |           |                                                                  |                                      |                                |                   |              |                 |                   |                                      |
| Usharani 2013                         | India     | Existing cases (NS)/on OAD                                       |                                      | A1=44?♂, A2=22?                | 57.4Ω             | 20Ω          | 7.7Ω            | NS                | Yes                                  |
| <b><i>Enicostemma axillare</i></b>    |           |                                                                  |                                      |                                |                   |              |                 |                   |                                      |
| Shankarrao 2017                       | India     | Newly diagnosed/treatment naïve                                  | Obesity                              | A1=20, A2=20                   | NS                | NS           | NS              | NS                | Unclear                              |
| <b><i>Gynostemma pentaphyllum</i></b> |           |                                                                  |                                      |                                |                   |              |                 |                   |                                      |
| Huyen 2010                            | Vietnam ¥ | Newly diagnosed/treatment naïve                                  |                                      | A1=12, A2=12                   | 60.4              | 7            | 8.8             | 174.6             | No                                   |
| Huyen 2012                            | Vietnam ¥ | Newly diagnosed/treatment naïve                                  |                                      | A1=12, A2=13                   | 55.0              | 10           | 8.9             | 167.4             | No                                   |

| Author and year                      | Country            | T2DM patients (duration of T2DM if existing cases [mean, years]) | Comorbidities/ complications of T2DM | Participants /eligible arm (n) | Age (mean, years) | Female s (n) | HbA1c (mean, %) | FBG (mean, mg/dL) | Any commercial funding/other support |
|--------------------------------------|--------------------|------------------------------------------------------------------|--------------------------------------|--------------------------------|-------------------|--------------|-----------------|-------------------|--------------------------------------|
| <b><i>Hibiscus sabdariffa</i></b>    |                    |                                                                  |                                      |                                |                   |              |                 |                   |                                      |
| Sarbini 2019                         | Indonesia          | Both (7.4Q)                                                      |                                      | A1=30, A2=30                   | 55.1Q             | 40Q          | NS              | 150.6Q            | Unclear                              |
| <b><i>Ipomoea batatas</i></b>        |                    |                                                                  |                                      |                                |                   |              |                 |                   |                                      |
| Ludvik 2004                          | Switzerland        | Both (NS)?                                                       |                                      | A1=30, A2=31                   | 55.4              | 27           | 7.1             | 144.0             | Yes                                  |
| Ludvik 2008                          | Austria?, Germany? | Both (3.9Q)?                                                     |                                      | A1=44?, A2=44?                 | 59.2Q             | 29Q          | 6.4Q            | 138.5Q            | Yes                                  |
| <b><i>Juglans regia</i></b>          |                    |                                                                  |                                      |                                |                   |              |                 |                   |                                      |
| Hosseini 2014a                       | Iran               | Existing cases (5.7Q)/on OAD                                     |                                      | A1=31, A2=31                   | 57.2Q             | 37           | 8.4Q            | 166.5Q            | No                                   |
| Hosseini 2014b                       | Iran               | Existing cases (6.4)/on OAD                                      |                                      | A1=32, A2=29                   | 55.1              | 33           | 8.4             | 166.5             | No                                   |
| Abdoli 2017                          | Iran               | Existing cases (7.1Q)/on OAD                                     |                                      | A1=25, A2=25                   | 55.8Q             | 25Q          | 8.0Q            | 160.8Q            | No                                   |
| Zibaeenezhad 2016, Zibaeenezhad 2017 | Iran               | Existing cases (NS)/on OAD                                       | Dyslipidemia?                        | A1=50?, A2=50?                 | 54.8Q             | 47Q          | 7.0Q            | 156.2Q            | No                                   |
| Rabiei 2018                          | Iran               | Existing cases (NS)/on OAD                                       |                                      | A1=25, A2=25                   | 50.2              | 37           | 9.7             | 200.1             | No                                   |
| <b><i>Linum usitatissimum</i></b>    |                    |                                                                  |                                      |                                |                   |              |                 |                   |                                      |
| Barre 2008                           | Canada             | Existing cases (NS)/on OAD?                                      |                                      | A1=20, A2=20                   | 60.1Q             | 20           | 7.1Q            | 145.0Q            | Yes                                  |
| Hashemzadeh 2017                     | Iran               | Existing cases (NS)/on OAD?                                      | Coronary heart disease               | A1=30, A2=30                   | 59.6              | NS           | NS              | NS                | Yes                                  |
| <b><i>Momordica charantia</i></b>    |                    |                                                                  |                                      |                                |                   |              |                 |                   |                                      |
| Dans 2007                            | Philippines        | Both (NS)                                                        |                                      | A1=20, A2=20                   | 59.2              | 25           | 8.0             | 149.4             | Yes                                  |
| Zänker 2012                          | Germany            | Both (NS)?                                                       |                                      | A1=44, A2=45                   | 62.5Q             | 18Q          | 6.5Q            | NS                | Yes                                  |
| Trakoon-osot 2013                    | Thailand           | Existing cases (7.5)/on OAD                                      |                                      | A1=19, A2=19                   | 58.0              | 27           | 7.4             | 118.0             | No                                   |
| Rahman 2015                          | Pakistan           | Newly diagnosed/treatment naïve                                  |                                      | A1=65, A2=30                   | 52.0Q             | 31Q          | NS              | 143.7Q            | Unclear                              |
| Suthar 2016a                         | India              | Existing cases (NS)/on OAD                                       |                                      | A1=64, A2=21                   | 41.3Q             | 30Q          | 7.9Q            | 149.4Q            | Yes                                  |
| Suthar 2016b                         | India              | Both (NS)                                                        |                                      | A1=83, A2=40                   | 48.6              | 54           | 8.2             | 151.5             | Yes                                  |
| Cortez-Navarrete 2018                | Mexico             | Newly diagnosed/treatment naïve?                                 |                                      | A1=12, A2=12                   | 48.6              | 16           | 7.7             | 138.6             | Unclear                              |

| Author and year              | Country           | T2DM patients (duration of T2DM if existing cases [mean, years]) | Comorbidities/ complications of T2DM       | Participants /eligible arm (n) | Age (mean, years) | Female s (n) | HbA1c (mean, %) | FBG (mean, mg/dL) | Any commercial funding/other support |
|------------------------------|-------------------|------------------------------------------------------------------|--------------------------------------------|--------------------------------|-------------------|--------------|-----------------|-------------------|--------------------------------------|
| Kumari 2018                  | India             | Existing cases (NS)/on OAD                                       |                                            | A1=50☹, A2=25                  | NS                | NS           | 7.3             | 152.9             | Unclear                              |
| Amini 2020☞                  | Iran              | Existing cases (9.3☹)/on OAD                                     |                                            | A1=12, A2=12                   | 51.8☹             | 0            | NS              | 190.6☹            | Unclear                              |
| Kim 2020                     | Republic of Korea | Existing cases (NS)/on OAD                                       |                                            | A1=66, A2=30                   | 59.2☹             | 40☹          | 7.0☹            | 138.5☹            | Unclear                              |
| <b>Nigella sativa</b>        |                   |                                                                  |                                            |                                |                   |              |                 |                   |                                      |
| Najmi 2012                   | India             | Newly diagnosed/treatment naïve                                  | Metabolic syndrome                         | A1=40, A2=40                   | NS                | 38           | 7.9             | 154.9             | Unclear                              |
| Hosseini 2013                | Iran              | Existing cases (6.2)/on OAD                                      |                                            | A1=35, A2=35                   | 49.7              | 40           | 8.8             | 180.0             | No                                   |
| Hadi 2015                    | Iran              | Existing cases (5.3☹)/on OAD                                     |                                            | A1=25, A2=25                   | 53.7☹             | 23☹          | NS              | 172.1☹            | Unclear                              |
| Heshmati 2015                | Iran              | Existing cases (7.0)/on OAD                                      |                                            | A1=36, A2=36                   | 46.4              | 38           | 8.3             | 192.6             | Unclear                              |
| Kaatabi 2015                 | Saudi Arabia      | Existing cases (6.6)/on OAD                                      |                                            | A1=57, A2=57                   | 46.5              | 51           | 8.4             | 188.4             | No?                                  |
| Moustafa 2019                | Egypt             | Newly diagnosed/treatment naïve                                  |                                            | A1=29, A2=36?                  | NS                | 47           | 7.5☹            | 154.4☹            | Unclear                              |
| Kooshki 2020                 | Iran              | Existing cases (7.5)/on OAD                                      |                                            | A1=27, A2=23                   | 54.1              | 34           | NS              | 195.8             | Unclear                              |
| Jangjo-Borazjani 2021        | Iran              | Existing cases (NS)/on OAD                                       |                                            | A1=20☹, A2=20☹                 | 43.6              | 40           | NS              | 135.9             | Unclear                              |
| <b>Plantago ovata</b>        |                   |                                                                  |                                            |                                |                   |              |                 |                   |                                      |
| Ziai 2005                    | Iran              | Existing cases (NS)/on OAD                                       |                                            | A1=27, A2=22                   | 52.8☹             | NS           | 9.8☹            | 193.7☹            | Unclear                              |
| Feinglos 2013                | US☹               | Both (NS)                                                        |                                            | A1=29☹, A2=8                   | 61.0              | 12           | 7.5             | 200.1             | Yes                                  |
| Abutair 2016                 | Palestin e☹       | Existing cases (NS)/on OAD                                       |                                            | A1=20, A2=20                   | NS                | 20           | 8.5☹            | 160.0☹            | No                                   |
| <b>Portulaca oleracea</b>    |                   |                                                                  |                                            |                                |                   |              |                 |                   |                                      |
| El-Sayed 2011                | Yemen             | Unclear                                                          | Obesity, dyslipidemia?, liver dysfunction? | A1=15, A2=15                   | 40.0              | 10           | NS              | 226.8             | No?                                  |
| Farzanegi 2014               | Iran              | Existing cases (NS)/on OAD                                       |                                            | A1=14☹, A2=14☹                 | 51.1              | 28           | NS              | 174.1             | Unclear                              |
| Dehghan 2016                 | Iran              | Existing cases (8.0?)/on OAD                                     |                                            | A1=16?☹, A2=16?☹               | 55.6              | 32?          | NS              | 167.0             | No                                   |
| Wainstein 2016               | Israel            | Existing cases (NS)/on OAD?                                      |                                            | A1=31, A2=32                   | 55.4              | 22           | 7.5             | 174.0             | Yes                                  |
| <b>Pterocarpus marsupium</b> |                   |                                                                  |                                            |                                |                   |              |                 |                   |                                      |

| Author and year                      | Country                                    | T2DM patients (duration of T2DM if existing cases [mean, years]) | Comorbidities/ complications of T2DM | Participants /eligible arm (n) | Age (mean, years) | Females (n) | HbA1c (mean, %) | FBG (mean, mg/dL) | Any commercial funding/other support |
|--------------------------------------|--------------------------------------------|------------------------------------------------------------------|--------------------------------------|--------------------------------|-------------------|-------------|-----------------|-------------------|--------------------------------------|
| Hariharan 2005                       | India                                      | Newly diagnosed/treatment naïve                                  |                                      | A1=182, A2=183                 | 46.0              | 150         | 10.5            | 169.2             | No                                   |
| <b><i>Punica granatum</i></b>        |                                            |                                                                  |                                      |                                |                   |             |                 |                   |                                      |
| Faghihimani 2016                     | Iran                                       | Existing cases (7.7)/on OAD                                      |                                      | A1=40, A2=40                   | 50.0              | 52          | 6.8             | 152.5             | Unclear                              |
| Babaeian 2013                        | Iran                                       | Existing cases (4.2)/on OAD                                      |                                      | A1=25, A2=25                   | 47.0              | 23          | 8.0             | 174.6             | Unclear                              |
| Sohrab 2014, Sohrab 2015             | Iran                                       | Existing cases (6.2)/on OAD                                      |                                      | A1=25, A2=25                   | 56.0              | 21          | 8.0             | 154.5             | Unclear                              |
| Khajebishak 2019a, Khajebishak 2019b | Iran                                       | Existing cases (5.9)/on OAD                                      | Obesity                              | A1=30, A2=30                   | 44.8              | 30          | 7.6             | 159.0             | Unclear                              |
| Grabež 2020                          | Republic of Srpska, Bosnia and Herzegovina | Existing cases (6.2)/on OAD                                      |                                      | A1=19, A2=18                   | 57.3              | 20          | 7.5             | 159.2             | No                                   |
| Hashemi 2020                         | Iran                                       | Existing cases (5.7)/on OAD                                      |                                      | A1=33, A2=32                   | 62.1              | 31          | 7.2             | 145.7             | No                                   |
| <b><i>Sesamum indicum</i></b>        |                                            |                                                                  |                                      |                                |                   |             |                 |                   |                                      |
| Shahi 2017                           | Iran                                       | Existing cases (NS)/on OAD                                       |                                      | A1=24, A2=24                   | 50.9              | NS          | 8.0             | 159.0             | No                                   |
| Aslam 2018                           | Pakistan                                   | Existing cases (NS)/on OAD                                       |                                      | A1=30?, A2=30?                 | NS                | NS          | 7.6             | 187.1             | No                                   |
| <b><i>Shilajit</i></b>               |                                            |                                                                  |                                      |                                |                   |             |                 |                   |                                      |
| Narasimha Raju 2016                  | India                                      | Both (NS)?                                                       |                                      | A1=56, A2=54                   | NS                | NS          | 7.6             | 193.4             | Unclear                              |
| Niranjan 2016                        | India                                      | Existing cases (NS)/on OAD                                       |                                      | A1=20, A2=20                   | 55.3              | 10          | 7.7             | NS                | Yes                                  |
| <b><i>Syzygium cumini</i></b>        |                                            |                                                                  |                                      |                                |                   |             |                 |                   |                                      |
| Sahana 2010                          | India                                      | Newly diagnosed/treatment naïve                                  |                                      | A1=15, A2=5, A3=10             | 56.2              | 14          | 8.3             | 150.8             | Yes                                  |
| Sidana 2016, Sidana 2017             | India                                      | Existing cases (NS)/on OAD                                       |                                      | A1=58, A2=55                   | NS                | NS          | 8.8             | 142.0             | No                                   |
| <b><i>Terminalia chebula</i></b>     |                                            |                                                                  |                                      |                                |                   |             |                 |                   |                                      |
| Usharani 2020                        | India                                      | Existing cases (NS)/on OAD                                       | Endothelial dysfunction              | A1=40, A2=20                   | 54.3              | 21          | 7.4             | 121.5             | Yes                                  |
| <b><i>Tinospora cordifolia</i></b>   |                                            |                                                                  |                                      |                                |                   |             |                 |                   |                                      |
| Mishra 2015                          | India                                      | Existing cases (NS)/on OAD                                       |                                      | A1=50?, A2=50?                 | 49.9              | NS          | 8.2             | 149.8             | No                                   |

| Author and year                         | Country      | T2DM patients (duration of T2DM if existing cases [mean, years]) | Comorbidities/ complications of T2DM | Participants /eligible arm (n) | Age (mean, years) | Female s (n) | HbA1c (mean, %) | FBG (mean, mg/dL) | Any commercial funding/other support |
|-----------------------------------------|--------------|------------------------------------------------------------------|--------------------------------------|--------------------------------|-------------------|--------------|-----------------|-------------------|--------------------------------------|
| Roy 2015                                | India        | Existing cases (NS)/on OAD                                       | Dyslipidemia                         | A1=30?, A2=30                  | NS                | NS           | 7.8Ω            | NS                | No                                   |
| <b><i>Tribulus terrestris</i></b>       |              |                                                                  |                                      |                                |                   |              |                 |                   |                                      |
| Samani 2016                             | Iran¥        | Existing cases (8.2Ω)/on OAD                                     |                                      | A1=50, A2=50                   | 52.5Ω             | 100          | 7.7Ω            | 158.0Ω            | No                                   |
| <b><i>Trigonella foenum-graecum</i></b> |              |                                                                  |                                      |                                |                   |              |                 |                   |                                      |
| Gupta 2001                              | India        | Both (NS)?                                                       |                                      | A1=12, A2=13                   | 51.0              | 6            | 8.3             | 142.9             | Yes                                  |
| Lu 2008                                 | China        | Existing cases (10.8)/on OAD                                     |                                      | A1=46, A2=23                   | 54.3              | 31           | 8.3             | 153.0             | Unclear                              |
| Ansari 2011                             | Pakistan     | Existing cases (NS)/on OAD                                       |                                      | A1=102, A2=108                 | 61.0Ω             | 82Ω          | 9.2Ω?           | NS                | Unclear                              |
| Rafraf 2014                             | Iran         | Existing cases (5.9Ω)/on OAD                                     |                                      | A1=45, A2=45                   | 40.5Ω             | 78Ω          | 8.8Ω            | 179.5Ω            | No                                   |
| Suchitra 2015                           | India        | Existing cases (7.1)/on OAD                                      |                                      | A1=30, A2=30                   | 50.2              | 23           | 7.9             | NS                | Unclear                              |
| Kaur 2016                               | India        | Newly diagnosed/treatment naïve                                  |                                      | A1=30, A2=30                   | 53.1              | 24           | 8.1             | 163.1             | No                                   |
| Singh 2016                              | India        | Both (NS)                                                        |                                      | A1=20, A2=20, A3=20            | 56.5              | 31           | 8.0             | 170.2             | No                                   |
| Verma 2016                              | India¥       | Existing cases (NS)/on OAD                                       |                                      | A1=77?, A2=77?                 | NS                | 46           | NS              | 152.1             | Yes                                  |
| Ranade 2017                             | India        | Existing cases (NS)/on OAD and/or insulin                        |                                      | A1=30, A2=30                   | 47.1              | 15           | 7.6             | 157.2             | No                                   |
| Gholaman 2018                           | Iran         | Existing cases (NS)/on OAD                                       | Obesity                              | A1=10, A2=10                   | NS                | 20           | NS              | 207.7             | Unclear                              |
| Kandhare 2018                           | India¥       | Existing cases (NS)/on OAD                                       |                                      | A1=60, A2=59                   | 51.5              | 66           | 8.5             | 180.2             | Yes                                  |
| Hassani 2019                            | Iran¥        | Existing cases (6.6Ω)/on OAD                                     |                                      | A1=72♣, A2=72♣                 | 51.4Ω             | 71Ω          | 8.1Ω            | 160.5Ω            | Unclear                              |
| Hota 2019\$                             | India        | Existing cases (NS)/on OAD                                       |                                      | A1=102, A2=102                 | 52.6              | 65           | 8.1             | 144.8             | Yes                                  |
| Najdi 2019                              | Saudi Arabia | Existing cases (4.8)/on OAD                                      |                                      | A1=6, A2=6                     | 51.2              | NS           | 8.2Ω            | 172.3Ω            | Unclear                              |
| Rashid 2019                             | Pakistan     | Newly diagnosed/treatment naïve                                  |                                      | A1=32, A2=32                   | 47.1              | 29           | 7.3             | 135.0             | Unclear                              |
| Hadi 2020                               | Iran         | Existing cases (4.7Ω)/on OAD                                     |                                      | A1=25, A2=25                   | 47.6Ω             | 25Ω          | NS              | 141.7Ω            | No                                   |
| <b><i>Urtica dioica</i></b>             |              |                                                                  |                                      |                                |                   |              |                 |                   |                                      |
| Namazi 2011, Esfanjani 2012aα,          | Iran         | Existing cases (8.5?Ω)/on OAD                                    |                                      | A1=25, A2=25                   | 53.5Ω             | 21?Ω         | 7.4Ω            | 135.5Ω            | Unclear                              |

| Author and year                                   | Country    | T2DM patients (duration of T2DM if existing cases [mean, years]) | Comorbidities/ complications of T2DM | Participants /eligible arm (n)  | Age (mean, years) | Females (n) | HbA1c (mean, %) | FBG (mean, mg/dL) | Any commercial funding/other support |
|---------------------------------------------------|------------|------------------------------------------------------------------|--------------------------------------|---------------------------------|-------------------|-------------|-----------------|-------------------|--------------------------------------|
| Esfanjan 2012b <sup>a</sup>                       |            |                                                                  |                                      |                                 |                   |             |                 |                   |                                      |
| Kianbakht 2013                                    | Iran       | Existing cases (12.8 $\Omega$ )/on OAD                           |                                      | A1=52, A2=55                    | 55.3 $\Omega$     | 75 $\Omega$ | 10.1 $\Omega$   | 255.3 $\Omega$    | No                                   |
| Khajeh-Mehrizi 2014                               | Iran       | Existing cases (NS)/on OAD                                       |                                      | A1=30, A2=30                    | 54.7 $\Omega$     | 28 $\Omega$ | NS              | 175.4 $\Omega$    | Unclear                              |
| Dabagh 2016                                       | Iran       | Existing cases (3.0)/on OAD                                      |                                      | A1=20 $\oplus$ , A2=20 $\oplus$ | 42.9              | 0           | NS              | 147.5             | No                                   |
| Hassani 2016 <sup>a</sup>                         | Iran       | Existing cases (NS)/on OAD                                       |                                      | A1=15?, A2=13?                  | NS                | 28?         | NS              | 177.9 $\Omega$    | Unclear                              |
| Dadvar 2017 <sup>a</sup>                          | Iran       | Existing cases (2.9)/on OAD                                      |                                      | A1=20 $\oplus$ , A2=20 $\oplus$ | 45.6              | 40          | NS              | 156.0             | Unclear                              |
| Ghalavand 2017                                    | Iran       | Existing cases (2.7)/on OAD                                      |                                      | A1=20 $\oplus$ , A2=20 $\oplus$ | 42.1              | 0           | NS              | 155.2             | Unclear                              |
| Korani 2017                                       | Iran       | Existing cases (2.5 $\Omega$ )/on OAD                            |                                      | A1=30, A2=30                    | 49.1 $\Omega$     | 36 $\Omega$ | 8.8 $\Omega$    | 142.5 $\Omega$    | Yes                                  |
| Mohammadnia 2017 <sup>a</sup>                     | Iran       | Existing cases (NS)/on OAD                                       |                                      | A1=15, A2=13                    | 55.8 $\Omega$     | 28          | NS              | NS                | Unclear                              |
| <b><i>Vernonia cinerea</i></b>                    |            |                                                                  |                                      |                                 |                   |             |                 |                   |                                      |
| Sayeed 2013                                       | Bangladesh | Existing cases (4.9)/on OAD                                      |                                      | A1=24, A2=24                    | 54.2              | 26          | 10.1            | 188.5             | Unclear                              |
| <b><i>Withania coagulans</i></b>                  |            |                                                                  |                                      |                                 |                   |             |                 |                   |                                      |
| Hemalatha 2018                                    | India      | Existing cases (NS)/on OAD                                       |                                      | A1=12, A2=12                    | NS                | 15          | NS              | 185.0             | Unclear                              |
| <b><i>Withania somnifera</i></b>                  |            |                                                                  |                                      |                                 |                   |             |                 |                   |                                      |
| Usharani 2014                                     | India      | Existing cases (NS)/on OAD                                       |                                      | A1=44? $\oplus$ , A2=22?        | 56.7 $\Omega$     | 21 $\Omega$ | NS              | NS                | Yes                                  |
| <b><i>Zingiber officinale</i></b>                 |            |                                                                  |                                      |                                 |                   |             |                 |                   |                                      |
| Mahluji 2013                                      | Iran       | Existing cases (NS)/on OAD                                       |                                      | A1=32, A2=32                    | 51.2 $\Omega$     | 24 $\Omega$ | 7.0 $\Omega$    | 147.5 $\Omega$    | No                                   |
| Arablou 2014a, Arablou 2014b <sup>a</sup>         | Iran       | Existing cases (3.9 $\Omega$ )/on OAD                            |                                      | A1=35, A2=35                    | 52.3 $\Omega$     | 48 $\Omega$ | 8.3 $\Omega$    | 130.0 $\Omega$    | No                                   |
| Mozaffari-Khosravi 2014, Talaei 2017, Talaei 2018 | Iran       | Existing cases (NS)/on OAD                                       |                                      | A1=44, A2=44                    | 50.4 $\Omega$     | 50 $\Omega$ | 7.6 $\Omega$    | 153.7 $\Omega$    | No?                                  |
| Shidfar 2015                                      | Iran       | Existing cases (5.3 $\Omega$ )/on OAD                            |                                      | A1=25, A2=25                    | 46.2 $\Omega$     | NS          | 7.4 $\Omega$    | 158.5 $\Omega$    | No?                                  |



[illegible]

[illegible]

[illegible]

| Author and year                                                                                       | Country | T2DM patients (duration of T2DM if existing cases [mean, years]) | Comorbidities/ complications of T2DM | Participants /eligible arm (n) | Age (mean, years) | Female s (n) | HbA1c (mean, %) | FBG (mean, mg/dL) | Any commercial funding/other support |
|-------------------------------------------------------------------------------------------------------|---------|------------------------------------------------------------------|--------------------------------------|--------------------------------|-------------------|--------------|-----------------|-------------------|--------------------------------------|
| Hsia 2004                                                                                             | US¥     | Existing cases (4.1Ω~)/on OAD                                    |                                      | A1=31, A2=16                   | 47.5Ω~            | 26Ω~         | 9.9Ω~           | 219.0Ω~           | Unclear                              |
| <b>Polyherbal formulation</b>                                                                         |         |                                                                  |                                      |                                |                   |              |                 |                   |                                      |
| Awasthi 2015                                                                                          | India   | Newly diagnosed/treatment naïve                                  |                                      | A1=48, A2=45                   | 45.6Ω             | 33Ω          | 7.6Ω            | 163.3Ω            | No?                                  |
| <b>Salasaradi Kashaya+Shilajit+Trivanga Bhasma+Tinospora cordifolia, Azadirachta indica; Hyponidd</b> |         |                                                                  |                                      |                                |                   |              |                 |                   |                                      |
| Bhat 2012\$                                                                                           | India   | Both (NS)                                                        |                                      | A1=25?, A2=25?                 | NS                | 8Ω           | NS              | 137.8Ω            | Yes?                                 |
| <b>Shilajit; Asanadi Ghana Vati</b>                                                                   |         |                                                                  |                                      |                                |                   |              |                 |                   |                                      |
| Gupta 2016                                                                                            | India   | Existing cases (NS)/on OAD                                       | Diabetic neuropathy?                 | A1=45?, A2=45?                 | NS                | 29Ω          | 7.7Ω            | 168.5Ω            | No                                   |
| <b>Swarnamakshika Bhasma</b>                                                                          |         |                                                                  |                                      |                                |                   |              |                 |                   |                                      |
| Taviad 2016\$                                                                                         | India   | Both (NS)                                                        |                                      | A1=54, A2=56                   | NS                | 65           | NS              | 180.2Ω            | Unclear                              |
| <b>Talapotaka Churna</b>                                                                              |         |                                                                  |                                      |                                |                   |              |                 |                   |                                      |
| Nille 2018                                                                                            | India   | Unclear                                                          |                                      | A1=16?♣, A2=12?, A3=8?         | NS                | NS           | 8.5Ω            | 150.7Ω            | Unclear                              |
| <b>Trigonella foenum-graecum, Ocimum tenuiflorum</b>                                                  |         |                                                                  |                                      |                                |                   |              |                 |                   |                                      |
| Mitra 2006                                                                                            | India   | Newly diagnosed/treatment naïve                                  | Dyslipidemia                         | A1=64♣, A2=16                  | 46.7              | 38           | NS              | 183.6             | Unclear                              |
| <b>Triticum aestivum; Nishamalaki; Triticum aestivum+Nishamalaki</b>                                  |         |                                                                  |                                      |                                |                   |              |                 |                   |                                      |
| Samagandi 2012                                                                                        | India   | Existing cases (NS)/on OAD                                       |                                      | A1=10, A2=10, A3=10            | NS                | NS           | NS              | 172.6             | Unclear                              |
| <b>Vidangadi Yoga</b>                                                                                 |         |                                                                  |                                      |                                |                   |              |                 |                   |                                      |
| Deshpande 2018                                                                                        | India   | Both (NS)                                                        |                                      | A1=31, A2=30                   | 49.2Ω             | 32Ω          | 7.0Ω            | 149.4Ω            | No                                   |
| <b>Vijaysaradi Ghana Vati; Madhumehari Vati</b>                                                       |         |                                                                  |                                      |                                |                   |              |                 |                   |                                      |
| Sharma 2018\$                                                                                         | India   | Existing cases (NS)/on OAD                                       |                                      | A1=29, A2=31                   | NS                | 19           | 8.1Ω            | 164.3Ω            | Yes                                  |

A1, A2, A3, A4, A5=Eligible study arms, FBG=Fasting blood glucose, HbA1c=Glycated hemoglobin, NS=Not specified, OAD=Oral antidiabetic drug, T2DM=Type 2 diabetes mellitus

\$Not a journal publication.

♣In Persian language.

¥Multicenter/site recruitment.

♣Two or more study arms were pooled together.

▼Median.

ΩPer-protocol analysis.

~Prior to randomization (and not at the point of randomization).

§Some of the Ayurvedic medicines contain single plant- or mineral-origin ingredient.

## Appendix S5: Details of the interventions.

| Author and year                                                       | Arm 1                                      | Arm 2                   | Arm 3   | Arm 4 | Arm 5 | Form and timing of administration of Ayurvedic medicine | Dose (g/day or otherwise mentioned) X duration (weeks) of Ayurvedic medicine | Anupan of Ayurvedic medicine |
|-----------------------------------------------------------------------|--------------------------------------------|-------------------------|---------|-------|-------|---------------------------------------------------------|------------------------------------------------------------------------------|------------------------------|
| <b>Ayurvedic medicine- single plant- or mineral-origin ingredient</b> |                                            |                         |         |       |       |                                                         |                                                                              |                              |
| <b><i>Abelmoschus esculentus</i></b>                                  |                                            |                         |         |       |       |                                                         |                                                                              |                              |
| Moradi 2020                                                           | <i>Abelmoschus esculentus</i> (fruit)      | Placebo                 |         |       |       | A1=Powder, BD                                           | A1=10 X 8                                                                    | A1=Yogurt                    |
| <b><i>Acacia Senegal</i></b>                                          |                                            |                         |         |       |       |                                                         |                                                                              |                              |
| Babiker 2017, Babiker 2018                                            | <i>Acacia senegal</i> (gum)                | Placebo                 |         |       |       | A1=Powder, OD                                           | A1=30 X 13                                                                   | A1=Water                     |
| <b><i>Aegle marmelos</i></b>                                          |                                            |                         |         |       |       |                                                         |                                                                              |                              |
| Sankhla 2009                                                          | <i>Aegle marmelos</i> (leaf, leaf extract) | Placebo (green gram)    |         |       |       | A1=Powder, BD                                           | A1=4 X 8                                                                     |                              |
| Sharma 2013                                                           | <i>Aegle marmelos</i> (leaf extract)☹      | Placebo                 |         |       |       | A1=Capsule, OD☹                                         | A1=0.25, 0.6 X 13☹                                                           |                              |
| Nigam 2019                                                            | <i>Aegle marmelos</i> (leaf)               | No additional medicine? |         |       |       | A1=Juice, OD                                            | A1=100(m l) X 8                                                              |                              |
| <b><i>Allium sativum</i></b>                                          |                                            |                         |         |       |       |                                                         |                                                                              |                              |
| Ashraf 2005                                                           | <i>Allium sativum</i> (clove)              | Placebo                 |         |       |       | A1=Tablet, BD                                           | A1=0.6 X 12                                                                  |                              |
| Ashraf 2011a                                                          | <i>Allium sativum</i> (clove)☹             | OAD                     | Placebo |       |       | A1=Tablet, Unclear☹                                     | A1=0.3, 0.6, 0.9, 1.2, 1.5 X 24☹                                             |                              |
| Ashraf 2011b                                                          | <i>Allium sativum</i> (clove)              | Placebo                 |         |       |       | A1=Tablet, TDS                                          | A1=0.9 X 24                                                                  |                              |
| Kumar 2013                                                            | <i>Allium sativum</i> (clove)              | No additional medicine  |         |       |       | A1=Capsule, BD                                          | A1=0.5 X 12                                                                  |                              |
| <b><i>Aloe vera</i></b>                                               |                                            |                         |         |       |       |                                                         |                                                                              |                              |
| Arora 2009                                                            | <i>Aloe vera</i> (leaf?)                   | No additional medicine  |         |       |       | A1=Juice, OD                                            | A1=150(m l) X 13                                                             |                              |
| Huseini 2012a, Huseini 2012b                                          | <i>Aloe vera</i> (leaf gel)                | Placebo                 |         |       |       | A1=Capsule, BD                                          | A1=0.6 X 9                                                                   |                              |

| Author and year                  | Arm 1                                                                        | Arm 2                  | Arm 3 | Arm 4 | Arm 5 | Form and timing of administration of Ayurvedic medicine | Dose (g/day or otherwise mentioned) X duration (weeks) of Ayurvedic medicine | Anupan of Ayurvedic medicine |
|----------------------------------|------------------------------------------------------------------------------|------------------------|-------|-------|-------|---------------------------------------------------------|------------------------------------------------------------------------------|------------------------------|
| Zarrintan 2015                   | <i>Aloe vera</i> (leaf? extract)                                             | Placebo                |       |       |       | A1=Tablet, OD                                           | A1=1 X 9                                                                     |                              |
| <b><i>Anethum graveolens</i></b> |                                                                              |                        |       |       |       |                                                         |                                                                              |                              |
| Mobasserri 2014                  | <i>Anethum graveolens</i> (leaf, stem)                                       | Placebo                |       |       |       | A1=Tablet, TDS                                          | A1=3.3 X 8                                                                   |                              |
| Haidari 2020                     | <i>Anethum graveolens</i> (leaf)                                             | Placebo                |       |       |       | A1=Capsule, TDS                                         | A1=3 X 8                                                                     |                              |
| <b><i>Azadirachta indica</i></b> |                                                                              |                        |       |       |       |                                                         |                                                                              |                              |
| Usharani 2020                    | <i>Azadirachta indica</i> (leaf+twig extract)☼                               | Placebo                |       |       |       | A1=Capsule, BD☼                                         | A1=0.25, 0.5, 1 X 12☼                                                        | A1=Water☼                    |
| <b><i>Berberis aristata</i></b>  |                                                                              |                        |       |       |       |                                                         |                                                                              |                              |
| Sharma 2017                      | <i>Berberis aristata</i> (stem)☼                                             | No additional medicine |       |       |       | A1=Powder, BD☼                                          | A1=1.5, 3 X 39☼                                                              |                              |
| <b><i>Boswellia serrata</i></b>  |                                                                              |                        |       |       |       |                                                         |                                                                              |                              |
| Azadmehr 2014                    | <i>Boswellia serrata</i> (gum resin)                                         | Placebo                |       |       |       | A1=Capsule, BD                                          | A1=0.8 X 12                                                                  |                              |
| Mehrzadi 2018                    | <i>Boswellia serrata</i> (gum resin)                                         | Placebo                |       |       |       | A1=Capsule, BD                                          | A1=0.5 X 8                                                                   |                              |
| <b><i>Camellia sinensis</i></b>  |                                                                              |                        |       |       |       |                                                         |                                                                              |                              |
| MacKenzie 2007                   | <i>Camellia sinensis</i> (green and black tea; leaf extract; decaffeinated)☼ | Placebo☼               |       |       |       | A1=Capsule, OD☼                                         | A1=0.375, 0.75 X 12☼                                                         |                              |
| Mirzaei 2009                     | <i>Camellia sinensis</i> (green tea; leaf extract)¶¶                         | Placebo                |       |       |       | A1=Capsule, TDS                                         | A1=1.5 X 8                                                                   |                              |
| Hsu 2011                         | <i>Camellia sinensis</i> (green tea; leaf extract; decaffeinated)            | Placebo                |       |       |       | A1=Capsule, TDS                                         | A1=1.5 X 16                                                                  |                              |
| Lasait 2014                      | <i>Camellia sinensis</i> (green tea; leaf extract)                           | Placebo                |       |       |       | A1=Capsule, BD to TDS                                   | A1=0.4 to 0.6 X 78                                                           |                              |
| Liu 2014                         | <i>Camellia sinensis</i> (green tea; leaf extract; decaffeinated)            | Placebo                |       |       |       | A1=Capsule, TDS                                         | A1=1.5 X 16                                                                  |                              |
| Quezada-Fernandez 2019           | <i>Camellia sinensis</i> (green tea; leaf extract; decaffeinated)            | Placebo                |       |       |       | A1=Capsule, Unclear                                     | A1=0.4 X 12                                                                  |                              |
| <b><i>Capparis spinosa</i></b>   |                                                                              |                        |       |       |       |                                                         |                                                                              |                              |
| Huseini 2013                     | <i>Capparis spinosa</i> (fruit extract)¶¶                                    | Placebo                |       |       |       | A1=Capsule, TDS                                         | A1=1.2 X 9                                                                   |                              |

| Author and year                     | Arm 1                                         | Arm 2                  | Arm 3 | Arm 4 | Arm 5 | Form and timing of administration of Ayurvedic medicine | Dose (g/day or otherwise mentioned) X duration (weeks) of Ayurvedic medicine | Anupan of Ayurvedic medicine |
|-------------------------------------|-----------------------------------------------|------------------------|-------|-------|-------|---------------------------------------------------------|------------------------------------------------------------------------------|------------------------------|
| <b><i>Cichorium intybus</i></b>     |                                               |                        |       |       |       |                                                         |                                                                              |                              |
| Chandra 2020                        | <i>Cichorium intybus</i> (seed extract)¶      | Placebo                |       |       |       | A1=Capsule, BD                                          | A1=0.541 X 12                                                                |                              |
| <b><i>Cinnamomum aromaticum</i></b> |                                               |                        |       |       |       |                                                         |                                                                              |                              |
| Mang 2006                           | <i>Cinnamomum aromaticum</i> (bark extract)   | Placebo                |       |       |       | A1=Capsule, TDS                                         | A1=0.336 X 17                                                                |                              |
| Suppapatiporn 2006                  | <i>Cinnamomum aromaticum</i> (bark)           | Placebo                |       |       |       | A1=Capsule, TDS                                         | A1=4.5? X 12                                                                 |                              |
| Blevins 2007                        | <i>Cinnamomum aromaticum</i> (bark)           | Placebo (wheat)        |       |       |       | A1=Capsule, BD                                          | A1=1 X 13                                                                    |                              |
| Crawford 2009                       | <i>Cinnamomum aromaticum</i> (bark)           | No additional medicine |       |       |       | A1=Capsule, OD?                                         | A1=1 X 13                                                                    |                              |
| Akilen 2010                         | <i>Cinnamomum aromaticum</i> (bark)¶          | Placebo                |       |       |       | A1=Capsule, TDS                                         | A1=2 X 12                                                                    |                              |
| Wainstein 2011                      | <i>Cinnamomum aromaticum</i> (bark)           | Placebo                |       |       |       | A1=Capsule, TDS                                         | A1=2.4 to 1.2 X 12                                                           |                              |
| Lu 2012                             | <i>Cinnamomum aromaticum</i> (bark extract)¶☼ | Placebo                |       |       |       | A1=Tablet, OD☼                                          | A1=0.12, 0.36 X 13☼                                                          |                              |
| Sharma 2012                         | <i>Cinnamomum aromaticum?</i> (bark)☼         | Placebo                |       |       |       | A1=Capsule, TDS☼                                        | A1=3, 6 X 13☼                                                                |                              |
| Hasanzade 2013                      | <i>Cinnamomum aromaticum</i> (bark)           | Placebo                |       |       |       | A1=Capsule, BD                                          | A1=1 X 9                                                                     |                              |
| Tangvarasitichai 2015, Sengsuk 2016 | <i>Cinnamomum aromaticum</i> (bark)           | Placebo                |       |       |       | A1=Capsule, TDS                                         | A1=1.5 X 9                                                                   |                              |
| <b><i>Cinnamomum verum</i></b>      |                                               |                        |       |       |       |                                                         |                                                                              |                              |
| Vafa 2012                           | <i>Cinnamomum verum</i> (bark)                | Placebo (wheat)        |       |       |       | A1=Capsule, TDS                                         | A1=3 X 8                                                                     |                              |
| Zahmatkesh 2012                     | <i>Cinnamomum verum</i> (bark)                | Placebo                |       |       |       | A1=Capsule, BD                                          | A1=1 X 8?                                                                    |                              |
| Talaei 2017                         | <i>Cinnamomum verum?</i> (bark)               | Placebo                |       |       |       | A1=Capsule, TDS                                         | A1=3 X 8                                                                     |                              |
| Zare 2019                           | <i>Cinnamomum verum?</i> (bark)¶☼             | Placebo☼               |       |       |       | A1=Capsule, BD☼                                         | A1=1 X 13☼                                                                   |                              |

| Author and year                      | Arm 1                                          | Arm 2                  | Arm 3 | Arm 4 | Arm 5 | Form and timing of administration of Ayurvedic medicine | Dose (g/day or otherwise mentioned) X duration (weeks) of Ayurvedic medicine | Anupan of Ayurvedic medicine |
|--------------------------------------|------------------------------------------------|------------------------|-------|-------|-------|---------------------------------------------------------|------------------------------------------------------------------------------|------------------------------|
| Mirmiranpour 2020                    | <i>Cinnamomum verum</i> (bark)                 | Placebo (rice)         |       |       |       | A1=Capsule, OD                                          | A1=0.5 X 13                                                                  |                              |
| <b><i>Citrullus colocynthis</i></b>  |                                                |                        |       |       |       |                                                         |                                                                              |                              |
| Huseini 2009                         | <i>Citrullus colocynthis</i> (fruit)           | Placebo                |       |       |       | A1=Capsule, TDS                                         | A1=0.3 X 9                                                                   |                              |
| Barghamdi 2016                       | <i>Citrullus colocynthis</i> (fruit)           | Placebo                |       |       |       | A1=Capsule, OD                                          | A1=0.125 X 9                                                                 |                              |
| <b><i>Coccinia grandis</i></b>       |                                                |                        |       |       |       |                                                         |                                                                              |                              |
| Kuriyan 2008, Kurpad 2008            | <i>Coccinia grandis</i> (aerial parts extract) | Placebo                |       |       |       | A1=Capsule, OD?                                         | A1=1 X 13                                                                    |                              |
| Quamri 2017                          | <i>Coccinia grandis</i> (leaf)                 | OAD                    |       |       |       | A1=Powder, BD                                           | A1=15 X 8                                                                    |                              |
| Wasana 2021                          | <i>Coccinia grandis</i> (leaf extract)¶        | Placebo (corn)         |       |       |       | A1=Capsule, OD                                          | A1=0.5 X 13                                                                  |                              |
| <b><i>Convolvulus prostratus</i></b> |                                                |                        |       |       |       |                                                         |                                                                              |                              |
| Patel 2012                           | <i>Convolvulus prostratus</i> (whole plant)    | No additional medicine |       |       |       | A1=Capsule, TDS                                         | A1=1.5 X 8                                                                   |                              |
| <b><i>Crocus sativus</i></b>         |                                                |                        |       |       |       |                                                         |                                                                              |                              |
| Milajerdi 2018                       | <i>Crocus sativus</i> (stigma extract)         | Placebo                |       |       |       | A1=Capsule, BD                                          | A1=0.03 X 8                                                                  |                              |
| Aleali 2019                          | <i>Crocus sativus</i> (stigma extract)         | Placebo                |       |       |       | A1=Capsule, Unclear                                     | A1=0.03 X 12                                                                 |                              |
| Ebrahimi 2019                        | <i>Crocus sativus</i> (stigma)                 | Placebo                |       |       |       | A1=Tablet, BD                                           | A1=0.1 X 12                                                                  | A1=Water                     |
| Mobasserri 2020                      | <i>Crocus sativus</i> (stigma)                 | Placebo                |       |       |       | A1=Capsule, OD                                          | A1=0.1 X 8                                                                   |                              |
| <b><i>Cuminum cyminum</i></b>        |                                                |                        |       |       |       |                                                         |                                                                              |                              |
| Jafari 2017                          | <i>Cuminum cyminum</i> (seed oil)☞             | Placebo                |       |       |       | A1=Capsule, Unclear☞                                    | A1=0.05, 0.1 X 8☞                                                            |                              |
| Hendre 2020                          | <i>Cuminum cyminum</i> (seed)                  | No additional medicine |       |       |       | A1=Capsule, OD                                          | A1=0.5 X 13                                                                  |                              |
| <b><i>Curcuma longa</i></b>          |                                                |                        |       |       |       |                                                         |                                                                              |                              |
| Usharani 2008                        | <i>Curcuma longa</i> (rhizome extract)         | Placebo                |       |       |       | A1=Capsule, BD                                          | A1=0.6 X 8                                                                   |                              |



[illegible]

| Author and year                        | Arm 1                                                      | Arm 2                   | Arm 3 | Arm 4 | Arm 5 | Form and timing of administration of Ayurvedic medicine | Dose (g/day or otherwise mentioned) X duration (weeks) of Ayurvedic medicine | Anupan of Ayurvedic medicine |
|----------------------------------------|------------------------------------------------------------|-------------------------|-------|-------|-------|---------------------------------------------------------|------------------------------------------------------------------------------|------------------------------|
| Huyen 2010                             | <i>Gynostemma pentaphyllum</i> (whole plant extract)¶      | Placebo (green tea)     |       |       |       | A1=Powder, BD                                           | A1=6 X 12                                                                    | A1=Water                     |
| Huyen 2012                             | <i>Gynostemma pentaphyllum</i> (whole plant extract)¶      | Placebo (green tea)     |       |       |       | A1=Powder, BD                                           | A1=6 X 8                                                                     | A1=Water                     |
| <b><i>Hibiscus sabdariffa</i></b>      |                                                            |                         |       |       |       |                                                         |                                                                              |                              |
| Sarbini 2019                           | <i>Hibiscus sabdariffa</i> ¶                               | Placebo                 |       |       |       | A1=Capsule, BD                                          | A1=1 X 8                                                                     |                              |
| <b><i>Ipomoea batatas</i></b>          |                                                            |                         |       |       |       |                                                         |                                                                              |                              |
| Ludvik 2004                            | <i>Ipomoea batatas</i> (white variety; tuber skin extract) | Placebo                 |       |       |       | A1=Tablet?, OD                                          | A1=4 X 12                                                                    |                              |
| Ludvik 2008                            | <i>Ipomoea batatas</i> (white variety; tuber skin extract) | Placebo                 |       |       |       | A1=Tablet, OD                                           | A1=4 X 22                                                                    |                              |
| <b><i>Juglans regia</i></b>            |                                                            |                         |       |       |       |                                                         |                                                                              |                              |
| Hosseini 2014a                         | <i>Juglans regia</i> (leaf extract)                        | Placebo                 |       |       |       | A1=Tablet, BD                                           | A1=0.4 X 9                                                                   |                              |
| Hosseini 2014b                         | <i>Juglans regia</i> (leaf extract)¶                       | Placebo                 |       |       |       | A1=Capsule, BD                                          | A1=0.2 X 13                                                                  |                              |
| Abdoli 2017                            | <i>Juglans regia</i> (leaf extract)¶                       | Placebo                 |       |       |       | A1=Capsule, TDS                                         | A1=0.75 X 13                                                                 |                              |
| Zibaeenezh ad 2016, Zibaeenezh ad 2017 | <i>Juglans regia</i> (seed oil)                            | Placebo?                |       |       |       | A1=Capsule, TDS                                         | A1=15 X 13                                                                   |                              |
| Rabiei 2018                            | <i>Juglans regia</i> (leaf extract)¶                       | Placebo                 |       |       |       | A1=Capsule, OD to BD                                    | A1=0.1 to 0.2 X 8                                                            |                              |
| <b><i>Linum usitatissimum</i></b>      |                                                            |                         |       |       |       |                                                         |                                                                              |                              |
| Barre 2008                             | <i>Linum usitatissimum</i> (seed oil)                      | Placebo (safflower oil) |       |       |       | A1=Capsule, Unclear                                     | A1=10 X 13                                                                   |                              |
| Hashemzadeh 2017                       | <i>Linum usitatissimum</i> (seed oil)                      | Placebo                 |       |       |       | A1=Capsule, BD                                          | A1=2 X 12                                                                    |                              |
| <b><i>Momordica charantia</i></b>      |                                                            |                         |       |       |       |                                                         |                                                                              |                              |
| Dans 2007                              | <i>Momordica charantia</i> (fruit+seed extract)            | Placebo                 |       |       |       | A1=Capsule, TDS                                         | A1=3? X 13                                                                   |                              |
| Zänker 2012                            | <i>Momordica charantia</i> (fruit? extract)                | Placebo                 |       |       |       | A1=Capsule, BD                                          | A1=1 X 17                                                                    |                              |
| Trakoonosot 2013                       | <i>Momordica charantia</i> (fruit pulp)¶                   | Placebo                 |       |       |       | A1=Capsule, TDS                                         | A1=6 X 16                                                                    |                              |
| Rahman 2015                            | <i>Momordica charantia</i> (fruit pulp)☉                   | OAD                     |       |       |       | A1=Capsule, Unclear☉                                    | A1=2, 4 X 10☉                                                                |                              |

| Author and year              | Arm 1                                       | Arm 2                   | Arm 3 | Arm 4 | Arm 5 | Form and timing of administration of Ayurvedic medicine | Dose (g/day or otherwise mentioned) X duration (weeks) of Ayurvedic medicine | Anupan of Ayurvedic medicine |
|------------------------------|---------------------------------------------|-------------------------|-------|-------|-------|---------------------------------------------------------|------------------------------------------------------------------------------|------------------------------|
| Suthar 2016a                 | <i>Momordica charantia</i> (fruit)          | Placebo                 |       |       |       | A1=Capsule, BD                                          | A1=1.2 X 13                                                                  |                              |
| Suthar 2016b                 | <i>Momordica charantia</i> (fruit)          | OAD                     |       |       |       | A1=Capsule, BD                                          | A1=0.8 to 1.2 X 15                                                           |                              |
| Cortez-Navarrete 2018        | <i>Momordica charantia</i> (fruit pulp)     | Placebo                 |       |       |       | A1=Capsule, BD                                          | A1=2 X 12                                                                    |                              |
| Kumari 2018                  | <i>Momordica charantia</i> (fruit?)☼        | Placebo                 |       |       |       | A1=Tablet, Unclear☼                                     | A1=1, 1.5 X 8☼                                                               |                              |
| Amini 2020                   | <i>Momordica charantia</i> (fruit)          | Placebo                 |       |       |       | A1=Capsule, BD                                          | A1=2 X 8                                                                     |                              |
| Kim 2020                     | <i>Momordica charantia</i> (fruit extract)¶ | Placebo                 |       |       |       | A1=Capsule, BD                                          | A1=2.38 X 12                                                                 |                              |
| <b><i>Nigella sativa</i></b> |                                             |                         |       |       |       |                                                         |                                                                              |                              |
| Najmi 2012                   | <i>Nigella sativa</i> (seed)                | No additional medicine  |       |       |       | A1=Capsule, OD                                          | A1=0.5 X 8                                                                   |                              |
| Hosseini 2013                | <i>Nigella sativa</i> (seed oil)            | Placebo                 |       |       |       | A1=Oil, BD                                              | A1=5(ml) X 13                                                                |                              |
| Hadi 2015                    | <i>Nigella sativa</i> (seed oil)            | Placebo                 |       |       |       | A1=Capsule, BD                                          | A1=1 X 8                                                                     |                              |
| Heshmati 2015                | <i>Nigella sativa</i> (seed oil)            | Placebo (sunflower oil) |       |       |       | A1=Capsule, TDS                                         | A1=3 X 12                                                                    |                              |
| Kaatabi 2015                 | <i>Nigella sativa</i> (seed)                | Placebo                 |       |       |       | A1=Capsule, BD                                          | A1=2 X 52                                                                    |                              |
| Moustafa 2019                | <i>Nigella sativa</i> (seed oil)            | OAD                     |       |       |       | A1=Capsule, TDS                                         | A1=1.35 X 12                                                                 |                              |
| Kooshki 2020                 | <i>Nigella sativa</i> (seed oil)            | Placebo                 |       |       |       | A1=Capsule, BD                                          | A1=1 X 8                                                                     |                              |
| Jangjo-Borazjani 2021        | <i>Nigella sativa</i> (seed)☼               | Placebo☼                |       |       |       | A1=Capsule, BD☼                                         | A1=2 X 8☼                                                                    |                              |
| <b><i>Plantago ovata</i></b> |                                             |                         |       |       |       |                                                         |                                                                              |                              |
| Ziai 2005                    | <i>Plantago ovata</i> (seed husk)           | Placebo                 |       |       |       | A1=Fiber, BD                                            | A1=10.2 X 8                                                                  | A1=Water                     |
| Feinglos 2013                | <i>Plantago ovata</i> (seed husk)☼          | Placebo                 |       |       |       | A1=Fiber, BD☼                                           | A1=6.8, 13.6 X 12☼                                                           |                              |

| Author and year                      | Arm 1                                            | Arm 2                   | Arm 3 | Arm 4 | Arm 5 | Form and timing of administration of Ayurvedic medicine | Dose (g/day or otherwise mentioned) X duration (weeks) of Ayurvedic medicine | Anupan of Ayurvedic medicine |
|--------------------------------------|--------------------------------------------------|-------------------------|-------|-------|-------|---------------------------------------------------------|------------------------------------------------------------------------------|------------------------------|
| Abutair 2016                         | <i>Plantago ovata</i> (seed husk)                | No additional medicine? |       |       |       | A1=Fiber, BD                                            | A1=10.5 X 8                                                                  | A1=Water                     |
| <b><i>Portulaca oleracea</i></b>     |                                                  |                         |       |       |       |                                                         |                                                                              |                              |
| El-Sayed 2011                        | <i>Portulaca oleracea</i> (seed)¶                | OAD                     |       |       |       | A1=Powder, BD                                           | A1=10 X 8                                                                    | A1=Skimmed yogurt            |
| Farzanegi 2014                       | <i>Portulaca oleracea</i> (seed)☼                | Placebo☼                |       |       |       | A1=Powder, BD☼                                          | A1=7.5 X 8☼                                                                  | A1=Skimmed yogurt☼           |
| Dehghan 2016                         | <i>Portulaca oleracea</i> (seed)¶☼               | Placebo☼                |       |       |       | A1=Capsule, BD☼                                         | A1=7.5 X 16☼                                                                 |                              |
| Wainstein 2016                       | <i>Portulaca oleracea</i> (whole plant extract)  | Placebo                 |       |       |       | A1=Capsule, OD?                                         | A1=0.18 X 12                                                                 |                              |
| <b><i>Pterocarpus marsupium</i></b>  |                                                  |                         |       |       |       |                                                         |                                                                              |                              |
| Hariharan 2005                       | <i>Pterocarpus marsupium</i> (heartwood extract) | OAD                     |       |       |       | A1=Capsule, BD                                          | A1=2 to 4 X 36                                                               |                              |
| <b><i>Punica granatum</i></b>        |                                                  |                         |       |       |       |                                                         |                                                                              |                              |
| Faghihimani 2016                     | <i>Punica granatum</i> (seed oil)                | Placebo                 |       |       |       | A1=Capsule, BD                                          | A1=2 X 8                                                                     |                              |
| Babaeian 2013                        | <i>Punica granatum</i> (fruit)                   | Placebo?                |       |       |       | A1=Juice, OD?                                           | A1=240(ml) X 8                                                               |                              |
| Sohrab 2014, Sohrab 2015             | <i>Punica granatum</i> (fruit)                   | Placebo                 |       |       |       | A1=Juice, OD?                                           | A1=250(ml) X 12                                                              |                              |
| Khajebishak 2019a, Khajebishak 2019b | <i>Punica granatum</i> (seed oil)                | Placebo                 |       |       |       | A1=Capsule, TDS                                         | A1=3 X 8                                                                     |                              |
| Grabež 2020                          | <i>Punica granatum</i> (peel extract)            | Placebo                 |       |       |       | A1=Capsule, BD                                          | A1=0.5 X 8                                                                   |                              |
| Hashemi 2020                         | <i>Punica granatum</i> (seed)                    | Placebo                 |       |       |       | A1=Infusion, BD                                         | A1=10 X 8                                                                    | A1=Hot water (infused in)    |
| <b><i>Sesamum indicum</i></b>        |                                                  |                         |       |       |       |                                                         |                                                                              |                              |
| Shahi 2017                           | <i>Sesamum indicum</i> (seed extract)            | Placebo                 |       |       |       | A1=Capsule, OD                                          | A1=0.2 X 8                                                                   | A1=Water                     |
| Aslam 2018                           | <i>Sesamum indicum</i> (seed oil)                | Placebo                 |       |       |       | A1=Oil, Unclear                                         | A1=30(ml) X 13                                                               |                              |

[illegible]

[illegible]

| Author and year                               | Arm 1                                       | Arm 2                   | Arm 3 | Arm 4 | Arm 5 | Form and timing of administration of Ayurvedic medicine | Dose (g/day or otherwise mentioned) X duration (weeks) of Ayurvedic medicine | Anupan of Ayurvedic medicine |
|-----------------------------------------------|---------------------------------------------|-------------------------|-------|-------|-------|---------------------------------------------------------|------------------------------------------------------------------------------|------------------------------|
| Namazi 2011, Esfanjani 2012a, Esfanjani 2012b | <i>Urtica dioica</i> (aerial parts extract) | Placebo                 |       |       |       | A1=Powder, TDS                                          | A1=0.1(/kg) X 8                                                              | A1=Lukewarm water            |
| Kianbakht 2013                                | <i>Urtica dioica</i> (leaf extract)¶        | Placebo                 |       |       |       | A1=Capsule, TDS                                         | A1=1.5 X 13                                                                  |                              |
| Khajeh-Mehrizi 2014                           | <i>Urtica dioica</i> (extract)              | Placebo                 |       |       |       | A1=Unclear, TDS                                         | A1=0.1(/kg) X 8                                                              |                              |
| Dabagh 2016                                   | <i>Urtica dioica</i> (leaf)☼                | No additional medicine☼ |       |       |       | A1=Powder, OD☼                                          | A1=10 X 8☼                                                                   | A1=Yogurt☼                   |
| Hassani 2016                                  | <i>Urtica dioica</i> (extract)              | Placebo                 |       |       |       | A1=Liquid, TDS                                          | A1=6(ml) X 8                                                                 | A1=Water                     |
| Dadvar 2017                                   | <i>Urtica dioica</i> ☼                      | No additional medicine☼ |       |       |       | A1=Powder, OD                                           | A1=10 X 8                                                                    | A1=Yogurt                    |
| Ghalavand 2017                                | <i>Urtica dioica</i> ☼                      | No additional medicine☼ |       |       |       | A1=Unclear, TDS☼                                        | A1=10 X 8☼                                                                   |                              |
| Korani 2017                                   | <i>Urtica dioica</i> (extract)              | Placebo                 |       |       |       | A1=Unclear, TDS                                         | A1=0.02(/kg) X 8                                                             |                              |
| Mohammadnia 2017                              | <i>Urtica dioica</i> (extract)              | Placebo                 |       |       |       | A1=Liquid, TDS                                          | A1=6(ml) X 8                                                                 | A1=Water                     |
| <b><i>Vernonia cinerea</i></b>                |                                             |                         |       |       |       |                                                         |                                                                              |                              |
| Sayeed 2013                                   | <i>Vernonia cinerea</i> (root)              | Placebo                 |       |       |       | A1=Tablet, TDS                                          | A1=6 X 13                                                                    |                              |
| <b><i>Withania coagulans</i></b>              |                                             |                         |       |       |       |                                                         |                                                                              |                              |
| Hemalatha 2018                                | <i>Withania coagulans</i> (fruit)           | Placebo                 |       |       |       | A1=Infusion, OD                                         | A1=2-2.5 X 9                                                                 | A1=Water (infused in)        |
| <b><i>Withania somnifera</i></b>              |                                             |                         |       |       |       |                                                         |                                                                              |                              |
| Usharani 2014                                 | <i>Withania somnifera</i> (root extract)☼   | Placebo                 |       |       |       | A1=Capsule, BD☼                                         | A1=0.5, 1 X 12☼                                                              |                              |
| <b><i>Zingiber officinale</i></b>             |                                             |                         |       |       |       |                                                         |                                                                              |                              |
| Mahluji 2013                                  | <i>Zingiber officinale</i> (rhizome)        | Placebo (corn)          |       |       |       | A1=Tablet, BD                                           | A1=2 X 8                                                                     |                              |
| Arablou 2014a,                                | <i>Zingiber officinale</i> (rhizome)        | Placebo (wheat)         |       |       |       | A1=Capsule, BD                                          | A1=1.6 X 12                                                                  |                              |

| Author and year                                                                                                                                                                                                                                        | Arm 1                                                                                                                                                                                                                                                                                                                                                                                                                                | Arm 2                                     | Arm 3                          | Arm 4 | Arm 5 | Form and timing of administration of Ayurvedic medicine | Dose (g/day or otherwise mentioned) X duration (weeks) of Ayurvedic medicine | Anupan of Ayurvedic medicine |
|--------------------------------------------------------------------------------------------------------------------------------------------------------------------------------------------------------------------------------------------------------|--------------------------------------------------------------------------------------------------------------------------------------------------------------------------------------------------------------------------------------------------------------------------------------------------------------------------------------------------------------------------------------------------------------------------------------|-------------------------------------------|--------------------------------|-------|-------|---------------------------------------------------------|------------------------------------------------------------------------------|------------------------------|
| Arablou 2014b                                                                                                                                                                                                                                          |                                                                                                                                                                                                                                                                                                                                                                                                                                      |                                           |                                |       |       |                                                         |                                                                              |                              |
| Mozaffari-Khosravi 2014, Talaei 2017, Talaei 2018                                                                                                                                                                                                      | <i>Zingiber officinale</i> (rhizome)                                                                                                                                                                                                                                                                                                                                                                                                 | Placebo                                   |                                |       |       | A1=Capsule, TDS                                         | A1=3 X 8                                                                     |                              |
| Shidfar 2015                                                                                                                                                                                                                                           | <i>Zingiber officinale</i> (rhizome)                                                                                                                                                                                                                                                                                                                                                                                                 | Placebo                                   |                                |       |       | A1=Capsule, TDS?                                        | A1=3 X 12                                                                    |                              |
| Arzati 2017, Zarezadeh 2018                                                                                                                                                                                                                            | <i>Zingiber officinale</i> (rhizome)                                                                                                                                                                                                                                                                                                                                                                                                 | Placebo (wheat)                           |                                |       |       | A1=Capsule, BD                                          | A1=2 X 10                                                                    |                              |
| Mohammadi 2017, Mohammadi 2019                                                                                                                                                                                                                         | <i>Zingiber officinale</i> (rhizome)✱                                                                                                                                                                                                                                                                                                                                                                                                | Placebo✱                                  |                                |       |       | A1=Capsule, QDS?✱                                       | A1=1 X 8✱                                                                    |                              |
| Carvalho 2020                                                                                                                                                                                                                                          | <i>Zingiber officinale</i> (rhizome extract)                                                                                                                                                                                                                                                                                                                                                                                         | Placebo                                   |                                |       |       | A1=Capsule, BD                                          | A1=1.2 X 13                                                                  |                              |
| Gholinezhad 2020                                                                                                                                                                                                                                       | <i>Zingiber officinale</i> (rhizome)                                                                                                                                                                                                                                                                                                                                                                                                 | Placebo (pea)                             |                                |       |       | A1=Tablet, BD                                           | A1=2 X 8                                                                     |                              |
| <b><i>Ziziphus mauritiana</i></b>                                                                                                                                                                                                                      |                                                                                                                                                                                                                                                                                                                                                                                                                                      |                                           |                                |       |       |                                                         |                                                                              |                              |
| Yazdanpanah 2017                                                                                                                                                                                                                                       | <i>Ziziphus mauritiana</i> (fruit pulp+peel)                                                                                                                                                                                                                                                                                                                                                                                         | No additional medicine                    |                                |       |       | A1=Infusion, TDS                                        | A1=30 X 12                                                                   | A1=Hot water                 |
| <b><i>Acalypha indica</i>/<i>Allium cepa</i>/<i>Allium sativum</i>/<i>Azadirachta indica</i>/<i>Mangifera indica</i>/<i>Murraya koenigii</i>/<i>Musa sapientum</i>/<i>Ocimum tenuiflorum</i>/<i>Phyllanthus amarus</i>/<i>Tinospora cordifolia</i></b> |                                                                                                                                                                                                                                                                                                                                                                                                                                      |                                           |                                |       |       |                                                         |                                                                              |                              |
| Balasubramaniam 2010                                                                                                                                                                                                                                   | <i>Acalypha indica</i> (whole plant extract)/ <i>Allium cepa</i> (bulb extract)/ <i>Allium sativum</i> (bulb extract)/ <i>Azadirachta indica</i> (leaf extract)/ <i>Mangifera indica</i> (stem bark extract)/ <i>Murraya koenigii</i> (leaf extract)/ <i>Musa sapientum</i> (flower extract)/ <i>Ocimum tenuiflorum</i> (leaf extract)/ <i>Phyllanthus amarus</i> (whole plant extract)/ <i>Tinospora cordifolia</i> (leaf extract)† | Placebo                                   |                                |       |       | A1=Decoction, OD?                                       | A1=5(ml) X 9                                                                 |                              |
| <b><i>Allium sativum</i>; <i>Cuminum cyminum</i></b>                                                                                                                                                                                                   |                                                                                                                                                                                                                                                                                                                                                                                                                                      |                                           |                                |       |       |                                                         |                                                                              |                              |
| Mansouri 2018                                                                                                                                                                                                                                          | <i>Allium sativum</i> (clove)                                                                                                                                                                                                                                                                                                                                                                                                        | <i>Cuminum cyminum</i> (seed)             | Placebo                        |       |       | A1=Capsule, TDS, A2=Capsule, BD                         | A1=0.9 X 9, A2=0.2 X 9                                                       |                              |
| <b><i>Aloe vera</i>; <i>Pterocarpus marsupium</i>; <i>Aloe vera</i>+<i>Pterocarpus marsupium</i></b>                                                                                                                                                   |                                                                                                                                                                                                                                                                                                                                                                                                                                      |                                           |                                |       |       |                                                         |                                                                              |                              |
| Maurya 2017                                                                                                                                                                                                                                            | <i>Aloe vera</i> (leaf?)                                                                                                                                                                                                                                                                                                                                                                                                             | <i>Pterocarpus marsupium</i> (heartwood?) | <i>Aloe vera</i> + <i>Pter</i> | OAD   |       | A1=Capsule, BD,                                         | A1=0.6 X 13, A2=2                                                            |                              |



| Author and year                                                                                   | Arm 1                                                                                                             | Arm 2                                     | Arm 3                                                    | Arm 4                                | Arm 5               | Form and timing of administration of Ayurvedic medicine        | Dose (g/day or otherwise mentioned) X duration (weeks) of Ayurvedic medicine | Anupan of Ayurvedic medicine                           |
|---------------------------------------------------------------------------------------------------|-------------------------------------------------------------------------------------------------------------------|-------------------------------------------|----------------------------------------------------------|--------------------------------------|---------------------|----------------------------------------------------------------|------------------------------------------------------------------------------|--------------------------------------------------------|
|                                                                                                   |                                                                                                                   |                                           | <i>ocarpus marsupium</i>                                 |                                      |                     | A2=Capsule, BD, A3=Capsule, OD+Capsule, BD                     | to 4 X 13, A3=0.3+1 to 3 X 13                                                |                                                        |
| <b><i>Cinnamomum verum; Crocus sativus; Elettaria cardamomum; Zingiber officinale</i></b>         |                                                                                                                   |                                           |                                                          |                                      |                     |                                                                |                                                                              |                                                        |
| Azimi 2014, Azimi 2016                                                                            | <i>Cinnamomum verum</i> (bark)                                                                                    | <i>Crocus sativus</i> (flower stigma)     | <i>Elettaria cardamomum</i> (seedpod)                    | <i>Zingiber officinale</i> (rhizome) | Placebo (black tea) | A1=Powder, TDS, A2=Powder, TDS, A3=Powder, TDS, A4=Powder, TDS | A1=3 X 8, A2=1 X 8, A3=3 X 8, A4=3 X 8                                       | A1=Black tea, A2=Black tea, A3=Black tea, A4=Black tea |
| <b><i>Enicostemma axillare; Shilajit</i></b>                                                      |                                                                                                                   |                                           |                                                          |                                      |                     |                                                                |                                                                              |                                                        |
| Kumar 2014                                                                                        | <i>Enicostemma axillare</i> (whole plant extract)                                                                 | Shilajit ( <i>Asphaltum punjabianum</i> ) | OAD                                                      |                                      |                     | A1=Capsule, BD, A2=Capsule, BD                                 | A1=1 X 13, A2=1 X 13                                                         | A1=Water, A2=Water                                     |
| <b><i>Enicostemma axillare+Emblica officinalis+Tinospora cordifolia</i></b>                       |                                                                                                                   |                                           |                                                          |                                      |                     |                                                                |                                                                              |                                                        |
| Sharma 2019                                                                                       | <i>Enicostemma axillare</i> (whole plant)+ <i>Emblica officinalis</i> (fruit)+ <i>Tinospora cordifolia</i> (stem) | No additional medicine                    |                                                          |                                      |                     | A1=Capsule, BD+Powder, BD+Powder, BD                           | A1=2+6+6 X 26                                                                | A1=Lukewarm water                                      |
| <b><i>Linum usitatissimum; Plantago ovata</i></b>                                                 |                                                                                                                   |                                           |                                                          |                                      |                     |                                                                |                                                                              |                                                        |
| Ricklefs-Johnson 2017                                                                             | <i>Linum usitatissimum</i> (seed)                                                                                 | <i>Plantago ovata</i> (seed husk)         |                                                          |                                      |                     | A1=Powder, Unclear, A2=Fiber, Unclear                          | A1=28 X 8, A2=9 X 8                                                          |                                                        |
| <b><i>Syzygium cumini+Withania coagulans</i></b>                                                  |                                                                                                                   |                                           |                                                          |                                      |                     |                                                                |                                                                              |                                                        |
| Siddiqui 2017                                                                                     | <i>Syzygium cumini</i> (seed?)+ <i>Withania coagulans</i> (fruit)                                                 | OAD                                       |                                                          |                                      |                     | A1=Powder, BD+Infusion, BD                                     | A1=12+Unclear (10 pieces) X 13                                               | A1=Water (infused in)                                  |
| <b><i>Trigonella foenum-graecum; Aegle marmelos; Trigonella foenum-graecum+Aegle marmelos</i></b> |                                                                                                                   |                                           |                                                          |                                      |                     |                                                                |                                                                              |                                                        |
| Yaheya 2009                                                                                       | <i>Trigonella foenum-graecum</i> (seed)                                                                           | <i>Aegle marmelos</i> (leaf)              | <i>Trigonella foenum-graecum</i> + <i>Aegle marmelos</i> | No additional medicine               |                     | A1=Powder, OD, A2=Decoction, OD, A3=Powder,                    | A1=20 X 16, A2=5 X 16, A3=20+5 X 16                                          |                                                        |

[illegible]

| Author and year                                                                         | Arm 1                                                                                                                                                                                                                                                                                                                                                                                                                                                                                                                                                                         | Arm 2                                         | Arm 3                                                  | Arm 4 | Arm 5 | Form and timing of administration of Ayurvedic medicine | Dose (g/day or otherwise mentioned) X duration (weeks) of Ayurvedic medicine | Anupan of Ayurvedic medicine         |
|-----------------------------------------------------------------------------------------|-------------------------------------------------------------------------------------------------------------------------------------------------------------------------------------------------------------------------------------------------------------------------------------------------------------------------------------------------------------------------------------------------------------------------------------------------------------------------------------------------------------------------------------------------------------------------------|-----------------------------------------------|--------------------------------------------------------|-------|-------|---------------------------------------------------------|------------------------------------------------------------------------------|--------------------------------------|
| Mahmoud 2016                                                                            | Diabetea tea (extracts of <i>Camellia sinensis</i> [black tea; leaf], <i>Cassia tora</i> [leaf, seed], <i>Ficus racemosa</i> [bark, fruit], <i>Ficus bengalensis</i> [bark, fruit], <i>Syzygium cumini</i> [bark], <i>Terminalia arjuna</i> [bark], <i>Terminalia chebula</i> [fruit], <i>Terminalia bellirica</i> [fruit], <i>Emblica officinalis</i> [fruit], <i>Tribulus terrestris</i> [fruit], <i>Trigonella foenum-graecum</i> [seed], <i>Cardiospermum halicacabum</i> [leaf], <i>Cinnamomum verum</i> [bark], <i>Azadirachta indica</i> [leaf, seed])                 | Placebo (black tea)                           |                                                        |       |       | A1=Infusion, TDS                                        | A1=7.5 X 12                                                                  | A1=Hot water (infused in)            |
| <b>Emblica officinalis; Withania somnifera; Emblica officinalis, Withania somnifera</b> |                                                                                                                                                                                                                                                                                                                                                                                                                                                                                                                                                                               |                                               |                                                        |       |       |                                                         |                                                                              |                                      |
| Usharani 2014                                                                           | <i>Emblica officinalis</i> (fruit extract)                                                                                                                                                                                                                                                                                                                                                                                                                                                                                                                                    | <i>Withania somnifera</i> (root+leaf extract) | <i>Emblica officinalis</i> , <i>Withania somnifera</i> |       |       | A1=Capsule, BD, A2=Capsule, BD, A3=Capsule, BD          | A1=1 X 12, A2=1 X 12, A3=1 X 12                                              |                                      |
| <b>Herbal combination</b>                                                               |                                                                                                                                                                                                                                                                                                                                                                                                                                                                                                                                                                               |                                               |                                                        |       |       |                                                         |                                                                              |                                      |
| Shokoohi 2017                                                                           | Herbal combination ( <i>Terminalia chebula</i> [fruit extract], <i>Commiphora wightii</i> [oleo-gum resin], <i>Commiphora myrrha</i> [oleo-gum resin])                                                                                                                                                                                                                                                                                                                                                                                                                        | Placebo                                       |                                                        |       |       | A1=Capsule, TDS                                         | A1=1.8 X 13                                                                  |                                      |
| <b>Hyponidd</b>                                                                         |                                                                                                                                                                                                                                                                                                                                                                                                                                                                                                                                                                               |                                               |                                                        |       |       |                                                         |                                                                              |                                      |
| Poongothai 2002                                                                         | Hyponidd (Shilajit [ <i>Asphaltum punjabianum</i> ], Yashad Bhasma [zinc preparation], <i>Momordica charantia</i> [fruit], <i>Curcuma longa</i> [rhizome extract], <i>Cassia auriculata</i> [seed extract], <i>Emblica officinalis</i> [fruit extract], <i>Syzygium cumini</i> [seed extract], <i>Gymnema sylvestre</i> [leaf extract], <i>Enicostemma axillare</i> [whole plant extract], <i>Azadirachta indica</i> [leaf extract], <i>Pterocarpus marsupium</i> [bark extract], <i>Tinospora cordifolia</i> [stem extract], <i>Swertia chirayita</i> [whole plant extract]) | Placebo                                       |                                                        |       |       | A1=Tablet, TDS                                          | A1=8.262 ? X 12                                                              |                                      |
| <b>Inolter</b>                                                                          |                                                                                                                                                                                                                                                                                                                                                                                                                                                                                                                                                                               |                                               |                                                        |       |       |                                                         |                                                                              |                                      |
| Agrawal 2002                                                                            | Inolter ( <i>Momordica charantia</i> [fruit+seed+leaf extract], <i>Trigonella foenum-graecum</i> [seed+pod+leaf extract], Shilajit [ <i>Asphaltum punjabianum</i> ], <i>Gymnema sylvestre</i> [root, leaf], <i>Syzygium cumini</i> [seed, fruit, leaf, bark])                                                                                                                                                                                                                                                                                                                 | Placebo                                       |                                                        |       |       | A1=Capsule, OD?                                         | A1=0.5? X 13                                                                 |                                      |
| <b>Kalpit</b>                                                                           |                                                                                                                                                                                                                                                                                                                                                                                                                                                                                                                                                                               |                                               |                                                        |       |       |                                                         |                                                                              |                                      |
| Agarwal 2013                                                                            | Kalpit ( <i>Holoptelea integrifolia</i> [bark], <i>Berberis aristata</i> [rhizome], <i>Mangifera indica</i> [seed], <i>Syzygium cumini</i> [seed], <i>Momordica charantia</i> [fruit], <i>Azadirachta indica</i> , <i>Aegle marmelos</i> [leaf], <i>Gymnema sylvestre</i> [leaf],                                                                                                                                                                                                                                                                                             | Kalpit+OAD                                    | OAD                                                    |       |       | A1=Powder, BD, A2=Powder, BD                            | A1=10 X 9, A2=10 X 9                                                         | A1=Lukewarm water, A2=Lukewarm water |

| Author and year                                                                                                          | Arm 1                                                                                                                                                                                  | Arm 2                                                                                                                                                                                                                                                    | Arm 3                                                    | Arm 4 | Arm 5 | Form and timing of administration of Ayurvedic medicine        | Dose (g/day or otherwise mentioned) X duration (weeks) of Ayurvedic medicine | Anupan of Ayurvedic medicine                                        |
|--------------------------------------------------------------------------------------------------------------------------|----------------------------------------------------------------------------------------------------------------------------------------------------------------------------------------|----------------------------------------------------------------------------------------------------------------------------------------------------------------------------------------------------------------------------------------------------------|----------------------------------------------------------|-------|-------|----------------------------------------------------------------|------------------------------------------------------------------------------|---------------------------------------------------------------------|
|                                                                                                                          | <i>Curcuma longa</i> [rhizome], <i>Trigonella foenum-graecum</i> [seed], <i>Emblica officinalis</i> [fruit], <i>Terminalia bellirica</i> [fruit], <i>Terminalia chebula</i> [fruit])   |                                                                                                                                                                                                                                                          |                                                          |       |       |                                                                |                                                                              |                                                                     |
| <b>Khadira-Kramuka Kashaya Ghanavati; Nishamalaki, Shilajit; Khadira-Kramuka Kashaya Ghanavati+Nishamalaki, Shilajit</b> |                                                                                                                                                                                        |                                                                                                                                                                                                                                                          |                                                          |       |       |                                                                |                                                                              |                                                                     |
| Paliwal 2018                                                                                                             | Khadira-Kramuka Kashaya Ghanavati ( <i>Acacia catechu</i> [extract], <i>Areca catechu</i> [fruit])                                                                                     | Nishamalaki ( <i>Curcuma longa</i> [rhizome], <i>Emblica officinalis</i> [fruit]), Shilajit ( <i>Asphaltum punjabianum</i> )                                                                                                                             | Khadira-Kramuka Kashaya Ghanavati +Nishamalaki, Shilajit |       |       | A1=Tablet, BD, A2=Powder, BD, A3=Tablet, BD+Powder, BD         | A1=1 X 13, A2=13 X 13, A3=1+13 X 13                                          |                                                                     |
| <b>Lodhradi Kashaya Ghana Vati</b>                                                                                       |                                                                                                                                                                                        |                                                                                                                                                                                                                                                          |                                                          |       |       |                                                                |                                                                              |                                                                     |
| Bramhankar 2017                                                                                                          | Lodhradi Kashaya Ghana Vati (extracts of <i>Symplocos racemosa</i> , <i>Terminalia chebula</i> [fruit], <i>Cyperus rotundus</i> , <i>Myrica esculenta</i> )                            | Lodhradi Kashaya Ghana Vati+OAD                                                                                                                                                                                                                          | OAD                                                      |       |       | A1=Tablet?, TDS, A2=Tablet?, TDS                               | A1=1.5 X 13, A2=1.5 X 13                                                     | A1=Warm water, A2=Warm water                                        |
| <b>Madhumeha Nashini Gutika; Darvyadi Kwatha; Madhumeha Nashini Gutika+Darvyadi Kwatha</b>                               |                                                                                                                                                                                        |                                                                                                                                                                                                                                                          |                                                          |       |       |                                                                |                                                                              |                                                                     |
| Bhawana 2015                                                                                                             | Madhumeha Nashini Gutika (Trivanga Bhasma [tin, lead, zinc preparation], <i>Gymnema sylvestre</i> [leaf], <i>Azadirachta indica</i> [leaf], Shilajit [ <i>Asphaltum punjabianum</i> ]) | Darvyadi Kwatha ( <i>Berberis aristata</i> , <i>Cedrus deodara</i> , <i>Terminalia chebula</i> [fruit], <i>Terminalia bellirica</i> [fruit], <i>Emblica officinalis</i> [fruit], <i>Cyperus rotundus</i> )                                               | Madhumeha Nashini Gutika+Darvyadi Kwatha                 |       |       | A1=Tablet, TDS, A2=Decoction, BD, A3=Tablet, TDS+Decoction, BD | A1=1.5 X 13, A2=40(ml) X 13, A3=1.5+40(ml) X 13                              | A1=Lukewarm water, A3=Lukewarm water (for Madhumeha Nashini Gutika) |
| <b>Mamajjaka Ghana Vati; Tejashiladi Vati</b>                                                                            |                                                                                                                                                                                        |                                                                                                                                                                                                                                                          |                                                          |       |       |                                                                |                                                                              |                                                                     |
| Bhagat 2017                                                                                                              | Mamajjaka Ghana Vati ( <i>Enicostemma axillare</i> [leaf], <i>Aconitum heterophyllum</i> [root], <i>Picrorhiza kurroa</i> [rhizome], <i>Piper longum</i> [fruit])                      | Tejashiladi Vati ( <i>Cinnamomum tamala</i> [leaf], Shilajit [ <i>Asphaltum punjabianum</i> ], Yashad Bhasma [zinc preparation])                                                                                                                         |                                                          |       |       | A1=Tablet, BD, A2=Tablet, BD                                   | A1=1 X 8, A2=1 X 8                                                           | A1=Lukewarm water, A2=Lukewarm water                                |
| <b>Mamajjaka Ghana Vati; Trikatu Gutika</b>                                                                              |                                                                                                                                                                                        |                                                                                                                                                                                                                                                          |                                                          |       |       |                                                                |                                                                              |                                                                     |
| Kataria 2017                                                                                                             | Mamajjaka Ghana Vati ( <i>Enicostemma axillare</i> [leaf], <i>Aconitum heterophyllum</i> [root], <i>Picrorhiza kurroa</i> [rhizome], <i>Piper longum</i> [fruit])                      | Trikatu Gutika ( <i>Piper longum</i> [fruit], <i>Zingiber officinale</i> [rhizome], <i>Piper nigrum</i> [fruit], <i>Terminalia chebula</i> [fruit], <i>Terminalia bellirica</i> [fruit], <i>Emblica officinalis</i> [fruit], <i>Commiphora wightii</i> ) |                                                          |       |       | A1=Tablet, TDS, A2=Tablet, TDS                                 | A1=6 X 8, A2=6 X 8                                                           | A1=Lukewarm water, A2=Lukewarm water                                |

[illegible]

| Author and year                                                                                       | Arm 1                                                                                                                                                                                                                                                                                                                                                                                                                                                                                                                                                                                                                                                                                                                                                                                                                                                                                                                                                                          | Arm 2                                                                                                                                                                                                                                                                                                                                                                                                                                                                                                                                                                         | Arm 3 | Arm 4 | Arm 5 | Form and timing of administration of Ayurvedic medicine              | Dose (g/day or otherwise mentioned) X duration (weeks) of Ayurvedic medicine | Anupan of Ayurvedic medicine                  |
|-------------------------------------------------------------------------------------------------------|--------------------------------------------------------------------------------------------------------------------------------------------------------------------------------------------------------------------------------------------------------------------------------------------------------------------------------------------------------------------------------------------------------------------------------------------------------------------------------------------------------------------------------------------------------------------------------------------------------------------------------------------------------------------------------------------------------------------------------------------------------------------------------------------------------------------------------------------------------------------------------------------------------------------------------------------------------------------------------|-------------------------------------------------------------------------------------------------------------------------------------------------------------------------------------------------------------------------------------------------------------------------------------------------------------------------------------------------------------------------------------------------------------------------------------------------------------------------------------------------------------------------------------------------------------------------------|-------|-------|-------|----------------------------------------------------------------------|------------------------------------------------------------------------------|-----------------------------------------------|
| Hsia 2004                                                                                             | Pancreas tonic (extracts of <i>Aegle marmelos</i> [leaf], <i>Pterocarpus marsupium</i> [heartwood], <i>Syzygium cumini</i> [fruit], <i>Momordica charantia</i> [seed], <i>Gymnema sylvestre</i> [leaf], <i>Trigonella foenum-graecum</i> [seed], <i>Azadirachta indica</i> [seed], <i>Ficus racemosa</i> , <i>Tinospora cordifolia</i> [stem], <i>Cinnamomum tamala</i> [leaf])                                                                                                                                                                                                                                                                                                                                                                                                                                                                                                                                                                                                | Placebo                                                                                                                                                                                                                                                                                                                                                                                                                                                                                                                                                                       |       |       |       | A1=Capsule, TDS                                                      | A1=Unclear (6 capsules) X 12                                                 |                                               |
| <b>Polyherbal formulation</b>                                                                         |                                                                                                                                                                                                                                                                                                                                                                                                                                                                                                                                                                                                                                                                                                                                                                                                                                                                                                                                                                                |                                                                                                                                                                                                                                                                                                                                                                                                                                                                                                                                                                               |       |       |       |                                                                      |                                                                              |                                               |
| Awasthi 2015                                                                                          | Polyherbal formulation (extracts of <i>Berberis aristata</i> , <i>Cyperus rotundus</i> , <i>Cedrus deodara</i> , <i>Embolia officinalis</i> [fruit], <i>Terminalia chebula</i> [fruit], <i>Terminalia bellirica</i> [fruit])                                                                                                                                                                                                                                                                                                                                                                                                                                                                                                                                                                                                                                                                                                                                                   | OAD                                                                                                                                                                                                                                                                                                                                                                                                                                                                                                                                                                           |       |       |       | A1=Capsule, Unclear                                                  | A1=0.5 to 3 X 24                                                             |                                               |
| <b>Salasaradi Kashaya+Shilajit+Trivanga Bhasma+Tinospora cordifolia, Azadirachta indica; Hyponidd</b> |                                                                                                                                                                                                                                                                                                                                                                                                                                                                                                                                                                                                                                                                                                                                                                                                                                                                                                                                                                                |                                                                                                                                                                                                                                                                                                                                                                                                                                                                                                                                                                               |       |       |       |                                                                      |                                                                              |                                               |
| Bhat 2012                                                                                             | Salasaradi Kashaya ( <i>Shorea robusta</i> [bark], <i>Acacia catechu</i> [bark extract?], <i>Acacia polyacantha</i> [bark], <i>Areca catechu</i> [fruit], <i>Betula utilis</i> [bark], <i>Gymnema sylvestre</i> [leaf], <i>Ougeinia oojeinensis</i> [bark+stem extract?], <i>Santalum album</i> [stem extract], <i>Pterocarpus santalinus</i> [stem extract], <i>Dalbergia sissoo</i> [bark extract?], <i>Albizia lebbek</i> [bark, seed], <i>Pterocarpus marsupium</i> [stem extract], <i>Anogeissus latifolia</i> [bark], <i>Terminalia arjuna</i> [bark], <i>Borassus flabellifer</i> [fruit, root], <i>Tectona grandis</i> [stem extract?], <i>Pongamia pinnata</i> [bark, leaf], <i>Holoptelea integrifolia</i> [bark], <i>Dipterocarpus turbinatus</i> [bark], <i>Aquilaria malaccensis</i> [stem extract]) + Shilajit ( <i>Asphaltum punjabianum</i> ) + Trivanga Bhasma (tin, lead, zinc preparation) + <i>Tinospora cordifolia</i> , <i>Azadirachta indica</i> (bark) | Hyponidd (Shilajit [ <i>Asphaltum punjabianum</i> ], Yashad Bhasma [zinc preparation], <i>Momordica charantia</i> [fruit], <i>Curcuma longa</i> [rhizome extract], <i>Cassia auriculata</i> [seed extract], <i>Embolia officinalis</i> [fruit extract], <i>Syzygium cumini</i> [seed extract], <i>Gymnema sylvestre</i> [leaf extract], <i>Enicostemma axillare</i> [whole plant extract], <i>Azadirachta indica</i> [leaf extract], <i>Pterocarpus marsupium</i> [bark extract], <i>Tinospora cordifolia</i> [stem extract], <i>Swertia chirayita</i> [whole plant extract]) |       |       |       | A1=Decoction, TDS+Capsule, BD+Powder?, OD+Powder, TDS, A2=Tablet, BD | A1=60(ml) +1+0.125+12 X 13, A2=5.508 ? X 13                                  | A1=Water+Water+Water+Lukewarm water, A2=Water |
| <b>Shilajit; Asanadi Ghana Vati</b>                                                                   |                                                                                                                                                                                                                                                                                                                                                                                                                                                                                                                                                                                                                                                                                                                                                                                                                                                                                                                                                                                |                                                                                                                                                                                                                                                                                                                                                                                                                                                                                                                                                                               |       |       |       |                                                                      |                                                                              |                                               |
| Gupta 2016                                                                                            | Shilajit ( <i>Asphaltum punjabianum</i> )                                                                                                                                                                                                                                                                                                                                                                                                                                                                                                                                                                                                                                                                                                                                                                                                                                                                                                                                      | Asanadi Ghana Vati (extracts of <i>Pterocarpus marsupium</i> , <i>Ougeinia oojeinensis</i> , <i>Betula utilis</i> , <i>Terminalia arjuna</i> , <i>Holoptelea integrifolia</i> , <i>Acacia catechu</i> , <i>Acacia</i>                                                                                                                                                                                                                                                                                                                                                         |       |       |       | A1=Capsule, BD, A2=Tablet, BD                                        | A1=1 X 13, A2=2 X 13                                                         |                                               |

| Author and year                                                      | Arm 1                                                                                                                                                                                                         | Arm 2                                                                                                                                                                                                                                                                                                                                | Arm 3                                 | Arm 4 | Arm 5 | Form and timing of administration of Ayurvedic medicine | Dose (g/day or otherwise mentioned) X duration (weeks) of Ayurvedic medicine | Anupan of Ayurvedic medicine                         |
|----------------------------------------------------------------------|---------------------------------------------------------------------------------------------------------------------------------------------------------------------------------------------------------------|--------------------------------------------------------------------------------------------------------------------------------------------------------------------------------------------------------------------------------------------------------------------------------------------------------------------------------------|---------------------------------------|-------|-------|---------------------------------------------------------|------------------------------------------------------------------------------|------------------------------------------------------|
|                                                                      |                                                                                                                                                                                                               | <i>polyacantha, Albizia lebbeck, Dalbergia sissoo, Gymnema sylvestre, Santalum album, Pterocarpus santalinus, Berberis aristata, Borassus flabellifer, Butea monosperma, Aquilaria malaccensis, Tectona grandis, Shorea robusta, Anogeissus latifolia, Areca catechu, Holarrhena pubescens, Vateria indica, Dipterocarpus alatus</i> |                                       |       |       |                                                         |                                                                              |                                                      |
| <b>Swarnamakshika Bhasma</b>                                         |                                                                                                                                                                                                               |                                                                                                                                                                                                                                                                                                                                      |                                       |       |       |                                                         |                                                                              |                                                      |
| Taviad 2016                                                          | Swarnamakshika Bhasma (chalcopryrite preparation)                                                                                                                                                             | Placebo                                                                                                                                                                                                                                                                                                                              |                                       |       |       | A1=Capsule, BD                                          | A1=1 X 8                                                                     | A1=Honey                                             |
| <b>Talapotaka Churna</b>                                             |                                                                                                                                                                                                               |                                                                                                                                                                                                                                                                                                                                      |                                       |       |       |                                                         |                                                                              |                                                      |
| Nille 2018                                                           | Talapotaka Churna ( <i>Cassia auriculata, Emblica officinalis</i> [fruit], <i>Curcuma longa</i> [rhizome], <i>Berberis aristata</i> )☞                                                                        | Talapotaka Churna+OAD                                                                                                                                                                                                                                                                                                                | OAD                                   |       |       | A1=Powder, TDS☞, A2=Powder, TDS                         | A1=12 X 9☞, A2=12 X 9                                                        | A1=Takra (butter milk) or warm water☞, A2=Warm water |
| <b>Trigonella foenum-graecum, Ocimum tenuiflorum</b>                 |                                                                                                                                                                                                               |                                                                                                                                                                                                                                                                                                                                      |                                       |       |       |                                                         |                                                                              |                                                      |
| Mitra 2006                                                           | <i>Trigonella foenum-graecum</i> (seed), <i>Ocimum tenuiflorum</i> (leaf)☞                                                                                                                                    | No medicine                                                                                                                                                                                                                                                                                                                          |                                       |       |       | A1=Powder, BD☞                                          | A1=27.5, 52.5, 77.5, 102.5 X 9☞                                              | A1=Water☞                                            |
| <b>Triticum aestivum; Nishamalaki; Triticum aestivum+Nishamalaki</b> |                                                                                                                                                                                                               |                                                                                                                                                                                                                                                                                                                                      |                                       |       |       |                                                         |                                                                              |                                                      |
| Samagandi 2012                                                       | <i>Triticum aestivum</i> (grass)                                                                                                                                                                              | Nishamalaki ( <i>Curcuma longa</i> [rhizome], <i>Emblica officinalis</i> [fruit])                                                                                                                                                                                                                                                    | <i>Triticum aestivum</i> +Nishamalaki |       |       | A1=Juice, BD, A2=Tablet, BD, A3=Juice, BD+Tablet, BD    | A1=100(m l) X 9, A2=2 X 9, A3=100(m l)+2 X 9                                 |                                                      |
| <b>Vidangadi Yoga</b>                                                |                                                                                                                                                                                                               |                                                                                                                                                                                                                                                                                                                                      |                                       |       |       |                                                         |                                                                              |                                                      |
| Deshpande 2018                                                       | Vidangadi Yoga (extracts of <i>Embelia ribes</i> [fruit], <i>Shorea robusta</i> [bark], <i>Terminalia arjuna</i> [bark], <i>Myrica esculenta</i> [bark], <i>Neolamarckia cadamba</i> [bark], <i>Symplocos</i> | OAD                                                                                                                                                                                                                                                                                                                                  |                                       |       |       | A1=Tablet, TDS                                          | A1=1.5 X 12                                                                  | A1=Water                                             |

| Author and year                                 | Arm 1                                                                                                                                                                                                                                                                                                                                                                                                                                                                             | Arm 2                                                                                                                                                                                                                                                                      | Arm 3 | Arm 4 | Arm 5 | Form and timing of administration of Ayurvedic medicine | Dose (g/day or otherwise mentioned) X duration (weeks) of Ayurvedic medicine | Anupan of Ayurvedic medicine |
|-------------------------------------------------|-----------------------------------------------------------------------------------------------------------------------------------------------------------------------------------------------------------------------------------------------------------------------------------------------------------------------------------------------------------------------------------------------------------------------------------------------------------------------------------|----------------------------------------------------------------------------------------------------------------------------------------------------------------------------------------------------------------------------------------------------------------------------|-------|-------|-------|---------------------------------------------------------|------------------------------------------------------------------------------|------------------------------|
|                                                 | <i>racemosa</i> [bark], <i>Pterocarpus marsupium</i> [bark], <i>Holarrhena pubescens</i> [bark])                                                                                                                                                                                                                                                                                                                                                                                  |                                                                                                                                                                                                                                                                            |       |       |       |                                                         |                                                                              |                              |
| <b>Vijaysaradi Ghana Vati; Madhumehari Vati</b> |                                                                                                                                                                                                                                                                                                                                                                                                                                                                                   |                                                                                                                                                                                                                                                                            |       |       |       |                                                         |                                                                              |                              |
| Sharma 2018                                     | Vijaysaradi Ghana Vati ( <i>Pterocarpus marsupium</i> [heartwood], <i>Terminalia chebula</i> [fruit], <i>Emblica officinalis</i> [fruit], <i>Terminalia bellirica</i> [fruit], <i>Swertia chirayita</i> [whole plant], <i>Trichosanthes dioica</i> [leaf], <i>Picrorhiza kurroa</i> [rhizome], <i>Tribulus terrestris</i> [fruit], <i>Cyperus rotundus</i> [root], <i>Santalum album</i> [heartwood], <i>Berberis aristata</i> [stem, root], <i>Vetiveria zizanioides</i> [root]) | Madhumehari Vati ( <i>Enicostemma axillare</i> [whole plant], <i>Gymnema sylvestre</i> [leaf], <i>Caesalpinia bonduc</i> [nut], <i>Picrorhiza kurroa</i> [rhizome], <i>Piper longum</i> [fruit], <i>Capsicum frutescens</i> [fruit], <i>Citrullus colocynthis</i> [fruit]) |       |       |       | A1=Tablet, TDS, A2=Tablet, TDS                          | A1=3 X 8, A2=3 X 8                                                           | A1=Water, A2=Water           |

A1, A2, A3, A4, A5=Eligible study arms (Ayurvedic detoxifying and purifying therapies [e.g., Panchakarma] are not mentioned but only Ayurvedic medicines [and their active ingredients] are mentioned), BD=Twice a day, OAD=Oral antidiabetic drug, OD=Once a day, QDS=Four times a day, TDS=Thrice a day

⊕ Two or more study arms were pooled together.

¶ Voucher specimen number/other reference number provided for Ayurvedic medicines.

§ Some of the Ayurvedic medicines contain single plant- or mineral-origin ingredient.

## Appendix S6: Assessment of methodological quality of included studies.

| Author and year                                                       | Q1 | Q2 | Q3 | Q4 | Q5 | Q6 | Q7 | Q8 | Q9 | Q10 | Q11 | Q12 | Q13 | % of Y |
|-----------------------------------------------------------------------|----|----|----|----|----|----|----|----|----|-----|-----|-----|-----|--------|
| <b>Ayurvedic medicine- single plant- or mineral-origin ingredient</b> |    |    |    |    |    |    |    |    |    |     |     |     |     |        |
| <b><i>Abelmoschus esculentus</i></b>                                  |    |    |    |    |    |    |    |    |    |     |     |     |     |        |
| Moradi 2020                                                           | Y  | U  | N  | U  | U  | U  | U  | N  | U  | Y   | U   | N   | Y   | 23     |
| <b><i>Acacia Senegal</i></b>                                          |    |    |    |    |    |    |    |    |    |     |     |     |     |        |
| Babiker 2017, Babiker 2018                                            | U  | U  | N  | U  | Y  | U  | Y  | N  | N  | Y   | U   | N   | Y   | 31     |
| <b><i>Aegle marmelos</i></b>                                          |    |    |    |    |    |    |    |    |    |     |     |     |     |        |
| Sankhla 2009                                                          | U  | U  | N  | U  | U  | U  | U  | N  | N  | Y   | U   | N   | Y   | 15     |
| Sharma 2013                                                           | U  | U  | Y  | Y  | U  | Y  | Y  | Y  | Y  | Y   | U   | N   | Y   | 62     |
| Nigam 2019                                                            | U  | U  | N  | U  | U  | U  | U  | N  | N  | Y   | U   | N   | Y   | 15     |
| <b><i>Allium sativum</i></b>                                          |    |    |    |    |    |    |    |    |    |     |     |     |     |        |
| Ashraf 2005                                                           | U  | U  | Y  | Y  | U  | U  | U  | N  | N  | Y   | U   | N   | Y   | 31     |
| Ashraf 2011a                                                          | U  | U  | Y  | U  | U  | U  | U  | N  | N  | Y   | U   | N   | Y   | 23     |
| Ashraf 2011b                                                          | U  | U  | N  | U  | U  | U  | Y  | N  | N  | U   | U   | N   | Y   | 15     |



| Author and year                      | Q1 | Q2 | Q3 | Q4 | Q5 | Q6 | Q7 | Q8 | Q9 | Q10 | Q11 | Q12 | Q13 | % of Y |
|--------------------------------------|----|----|----|----|----|----|----|----|----|-----|-----|-----|-----|--------|
| Kumar 2013                           | U  | U  | U  | N  | N  | N  | Y  | U  | U  | Y   | U   | N   | Y   | 23     |
| <b><i>Aloe vera</i></b>              |    |    |    |    |    |    |    |    |    |     |     |     |     |        |
| Arora 2009                           | U  | U  | N  | U  | U  | U  | Y  | N  | N  | U   | U   | N   | Y   | 15     |
| Huseini 2012a, Huseini 2012b         | U  | U  | N  | Y  | U  | U  | Y  | N  | N  | Y   | U   | N   | Y   | 31     |
| Zarrintan 2015                       | Y  | Y  | N  | Y  | Y  | Y  | Y  | N  | N  | Y   | U   | N   | Y   | 62     |
| <b><i>Anethum graveolens</i></b>     |    |    |    |    |    |    |    |    |    |     |     |     |     |        |
| Mobasser 2014                        | Y  | U  | N  | Y  | U  | U  | Y  | N  | N  | Y   | U   | N   | Y   | 38     |
| Haidari 2020                         | Y  | U  | N  | Y  | U  | U  | Y  | N  | N  | Y   | U   | N   | Y   | 38     |
| <b><i>Azadirachta indica</i></b>     |    |    |    |    |    |    |    |    |    |     |     |     |     |        |
| Usharani 2020                        | Y  | U  | N  | Y  | Y  | U  | Y  | N  | N  | U   | U   | N   | Y   | 38     |
| <b><i>Berberis aristata</i></b>      |    |    |    |    |    |    |    |    |    |     |     |     |     |        |
| Sharma 2017                          | U  | U  | N  | N  | N  | N  | Y  | N  | N  | Y   | U   | N   | Y   | 23     |
| <b><i>Boswellia serrata</i></b>      |    |    |    |    |    |    |    |    |    |     |     |     |     |        |
| Azadmehr 2014                        | U  | U  | Y  | Y  | U  | U  | Y  | Y  | Y  | Y   | U   | N   | Y   | 54     |
| Mehrzadi 2018                        | Y  | U  | N  | Y  | Y  | U  | Y  | N  | Y  | Y   | U   | N   | Y   | 54     |
| <b><i>Camellia sinensis</i></b>      |    |    |    |    |    |    |    |    |    |     |     |     |     |        |
| MacKenzie 2007                       | Y  | U  | N  | U  | Y  | U  | Y  | N  | N  | U   | U   | N   | Y   | 31     |
| Mirzaei 2009                         | U  | U  | N  | U  | U  | U  | U  | U  | Y  | Y   | U   | N   | Y   | 23     |
| Hsu 2011                             | Y  | U  | Y  | Y  | Y  | U  | Y  | N  | N  | Y   | U   | N   | Y   | 54     |
| Lasait 2014                          | U  | U  | Y  | U  | U  | U  | U  | N  | N  | Y   | U   | N   | Y   | 23     |
| Liu 2014                             | Y  | Y  | N  | Y  | Y  | U  | Y  | N  | N  | Y   | U   | N   | Y   | 54     |
| Quezada-Fernandez 2019               | U  | U  | N  | Y  | U  | U  | Y  | N  | N  | Y   | U   | N   | Y   | 31     |
| <b><i>Capparis spinosa</i></b>       |    |    |    |    |    |    |    |    |    |     |     |     |     |        |
| Huseini 2013                         | U  | U  | N  | Y  | U  | Y  | Y  | N  | N  | Y   | U   | N   | Y   | 38     |
| <b><i>Cichorium intybus</i></b>      |    |    |    |    |    |    |    |    |    |     |     |     |     |        |
| Chandra 2020                         | U  | U  | Y  | Y  | U  | Y  | Y  | N  | N  | Y   | U   | N   | Y   | 46     |
| <b><i>Cinnamomum aromaticum</i></b>  |    |    |    |    |    |    |    |    |    |     |     |     |     |        |
| Mang 2006                            | U  | U  | N  | Y  | U  | U  | U  | N  | N  | Y   | U   | N   | Y   | 23     |
| Suppakitiporn 2006                   | U  | U  | N  | U  | U  | U  | Y  | Y  | Y  | U   | U   | N   | Y   | 31     |
| Blevins 2007                         | U  | U  | N  | U  | U  | U  | U  | N  | N  | U   | U   | N   | Y   | 8      |
| Crawford 2009                        | Y  | U  | Y  | N  | U  | Y  | Y  | N  | Y  | Y   | U   | N   | Y   | 54     |
| Akilen 2010                          | Y  | Y  | Y  | Y  | Y  | U  | U  | N  | Y  | Y   | U   | N   | Y   | 62     |
| Wainstein 2011                       | U  | U  | N  | Y  | U  | U  | U  | U  | Y  | U   | U   | N   | Y   | 23     |
| Lu 2012                              | U  | U  | N  | Y  | Y  | U  | Y  | N  | N  | Y   | U   | N   | Y   | 38     |
| Sharma 2012                          | U  | U  | N  | Y  | U  | Y  | Y  | U  | Y  | U   | U   | N   | Y   | 38     |
| Hasanzade 2013                       | U  | U  | N  | Y  | U  | U  | Y  | U  | Y  | Y   | U   | N   | Y   | 38     |
| Tangvarasittichai 2015, Sengsuk 2016 | Y  | Y  | N  | Y  | U  | U  | Y  | N  | N  | Y   | U   | N   | Y   | 46     |
| <b><i>Cinnamomum verum</i></b>       |    |    |    |    |    |    |    |    |    |     |     |     |     |        |
| Vafa 2012                            | U  | U  | N  | Y  | U  | U  | Y  | N  | N  | Y   | U   | N   | Y   | 31     |
| Zahmatkesh 2012                      | U  | U  | N  | U  | U  | U  | U  | N  | N  | U   | U   | N   | Y   | 8      |
| Talaei 2017                          | U  | U  | Y  | Y  | U  | U  | Y  | N  | N  | Y   | U   | N   | Y   | 38     |
| Zare 2019                            | Y  | Y  | N  | Y  | Y  | U  | U  | N  | N  | Y   | U   | N   | Y   | 46     |
| Mirmiranpour 2020                    | Y  | U  | Y  | U  | U  | U  | U  | N  | N  | Y   | U   | N   | Y   | 31     |
| <b><i>Citrullus colocynthis</i></b>  |    |    |    |    |    |    |    |    |    |     |     |     |     |        |
| Huseini 2009                         | Y  | Y  | N  | Y  | U  | Y  | Y  | Y  | Y  | Y   | U   | N   | Y   | 69     |

| Author and year                       | Q1 | Q2 | Q3 | Q4 | Q5 | Q6 | Q7 | Q8 | Q9 | Q10 | Q11 | Q12 | Q13 | % of Y |
|---------------------------------------|----|----|----|----|----|----|----|----|----|-----|-----|-----|-----|--------|
| Barghamdi 2016                        | U  | U  | N  | Y  | U  | U  | Y  | Y  | Y  | U   | U   | N   | Y   | 38     |
| <b><i>Coccinia grandis</i></b>        |    |    |    |    |    |    |    |    |    |     |     |     |     |        |
| Kuriyan 2008, Kurpad 2008             | U  | U  | N  | U  | U  | U  | Y  | N  | N  | Y   | U   | N   | Y   | 23     |
| Quamri 2017                           | Y  | U  | Y  | U  | U  | U  | U  | U  | U  | U   | U   | N   | Y   | 23     |
| Wasana 2021                           | Y  | U  | N  | Y  | U  | U  | Y  | N  | Y  | Y   | U   | N   | Y   | 46     |
| <b><i>Convolvulus prostratus</i></b>  |    |    |    |    |    |    |    |    |    |     |     |     |     |        |
| Patel 2012                            | U  | U  | N  | U  | U  | U  | U  | N  | N  | U   | U   | N   | Y   | 8      |
| <b><i>Crocus sativus</i></b>          |    |    |    |    |    |    |    |    |    |     |     |     |     |        |
| Milajerdi 2018                        | Y  | N  | N  | Y  | U  | U  | Y  | N  | N  | Y   | U   | N   | Y   | 38     |
| Aleali 2019                           | U  | U  | N  | Y  | U  | U  | Y  | N  | N  | Y   | U   | N   | Y   | 31     |
| Ebrahimi 2019                         | Y  | U  | N  | Y  | U  | U  | Y  | N  | N  | Y   | U   | N   | Y   | 38     |
| Mobasserri 2020                       | Y  | U  | N  | U  | U  | U  | U  | N  | N  | Y   | U   | N   | Y   | 23     |
| <b><i>Cuminum cyminum</i></b>         |    |    |    |    |    |    |    |    |    |     |     |     |     |        |
| Jafari 2017                           | U  | U  | N  | Y  | U  | U  | Y  | N  | N  | Y   | U   | N   | Y   | 31     |
| Hendre 2020                           | U  | U  | U  | U  | U  | U  | Y  | U  | U  | U   | U   | U   | Y   | 15     |
| <b><i>Curcuma longa</i></b>           |    |    |    |    |    |    |    |    |    |     |     |     |     |        |
| Usharani 2008                         | U  | U  | Y  | U  | U  | U  | U  | N  | N  | U   | U   | N   | Y   | 15     |
| Na 2013                               | Y  | U  | Y  | Y  | U  | Y  | Y  | N  | N  | Y   | U   | N   | Y   | 54     |
| Chuengsamarn 2014                     | Y  | Y  | Y  | Y  | U  | U  | Y  | N  | N  | U   | U   | Y   | Y   | 54     |
| Panahi 2017, Panahi 2018              | U  | U  | N  | Y  | U  | U  | Y  | N  | N  | U   | U   | N   | Y   | 23     |
| Adab 2019                             | U  | U  | N  | Y  | U  | U  | Y  | N  | N  | Y   | U   | N   | Y   | 31     |
| Adibian 2019                          | U  | U  | N  | Y  | U  | U  | Y  | N  | N  | U   | U   | N   | Y   | 23     |
| Srinivasan 2019                       | Y  | U  | N  | Y  | U  | U  | Y  | N  | N  | Y   | U   | N   | Y   | 38     |
| de Sousa 2020                         | U  | U  | N  | U  | U  | U  | U  | N  | N  | U   | U   | N   | Y   | 8      |
| <b><i>Cyamopsis tetragonoloba</i></b> |    |    |    |    |    |    |    |    |    |     |     |     |     |        |
| Uusitupa 1984                         | U  | U  | N  | U  | U  | U  | Y  | N  | N  | Y   | U   | N   | Y   | 23     |
| Uusitupa 1989                         | U  | U  | N  | U  | U  | U  | Y  | Y  | Y  | Y   | U   | N   | Y   | 38     |
| <b><i>Eclipta prostrata</i></b>       |    |    |    |    |    |    |    |    |    |     |     |     |     |        |
| Sazia 2015a, Sazia 2015b              | Y  | U  | U  | U  | U  | U  | Y  | N  | N  | Y   | U   | N   | Y   | 31     |
| <b><i>Elettaria cardamomum</i></b>    |    |    |    |    |    |    |    |    |    |     |     |     |     |        |
| Aghasi 2019                           | U  | U  | N  | Y  | U  | U  | Y  | N  | Y  | Y   | U   | N   | Y   | 38     |
| <b><i>Emblica officinalis</i></b>     |    |    |    |    |    |    |    |    |    |     |     |     |     |        |
| Usharani 2013                         | U  | U  | N  | Y  | U  | U  | U  | U  | U  | U   | U   | N   | Y   | 15     |
| <b><i>Enicostemma axillare</i></b>    |    |    |    |    |    |    |    |    |    |     |     |     |     |        |
| Shankarrao 2017                       | U  | U  | U  | N  | N  | N  | Y  | U  | U  | U   | U   | N   | Y   | 15     |
| <b><i>Gynostemma pentaphyllum</i></b> |    |    |    |    |    |    |    |    |    |     |     |     |     |        |
| Huyen 2010                            | U  | U  | N  | U  | U  | U  | Y  | Y  | N  | Y   | U   | N   | Y   | 31     |
| Huyen 2012                            | U  | U  | N  | U  | U  | U  | Y  | Y  | Y  | Y   | U   | N   | Y   | 38     |
| <b><i>Hibiscus sabdariffa</i></b>     |    |    |    |    |    |    |    |    |    |     |     |     |     |        |
| Sarbini 2019                          | Y  | U  | N  | Y  | U  | Y  | Y  | N  | N  | Y   | U   | N   | Y   | 46     |
| <b><i>Ipomoea batatas</i></b>         |    |    |    |    |    |    |    |    |    |     |     |     |     |        |
| Ludvik 2004                           | U  | U  | N  | U  | U  | U  | Y  | U  | U  | U   | U   | N   | Y   | 15     |
| Ludvik 2008                           | U  | U  | N  | U  | U  | U  | Y  | N  | N  | Y   | U   | N   | Y   | 23     |
| <b><i>Juglans regia</i></b>           |    |    |    |    |    |    |    |    |    |     |     |     |     |        |
| Hosseini 2014a                        | U  | U  | Y  | Y  | U  | Y  | Y  | N  | N  | Y   | U   | N   | Y   | 46     |

| Author and year                      | Q1 | Q2 | Q3 | Q4 | Q5 | Q6 | Q7 | Q8 | Q9 | Q10 | Q11 | Q12 | Q13 | % of Y |
|--------------------------------------|----|----|----|----|----|----|----|----|----|-----|-----|-----|-----|--------|
| Hosseini 2014b                       | U  | U  | N  | Y  | U  | U  | Y  | Y  | Y  | Y   | U   | N   | Y   | 46     |
| Abdoli 2017                          | Y  | U  | N  | Y  | U  | U  | Y  | N  | N  | Y   | U   | N   | Y   | 38     |
| Zibaeenezhad 2016, Zibaeenezhad 2017 | Y  | U  | N  | U  | U  | Y  | Y  | N  | N  | Y   | U   | N   | Y   | 38     |
| Rabiei 2018                          | U  | U  | N  | U  | U  | U  | Y  | N  | N  | U   | U   | N   | Y   | 15     |
| <b><i>Linum usitatissimum</i></b>    |    |    |    |    |    |    |    |    |    |     |     |     |     |        |
| Barre 2008                           | U  | U  | N  | U  | U  | U  | U  | N  | N  | Y   | U   | N   | Y   | 15     |
| Hashemzadeh 2017                     | Y  | U  | Y  | Y  | U  | U  | U  | Y  | Y  | Y   | U   | N   | Y   | 54     |
| <b><i>Momordica charantia</i></b>    |    |    |    |    |    |    |    |    |    |     |     |     |     |        |
| Dans 2007                            | Y  | U  | Y  | Y  | U  | U  | Y  | N  | Y  | U   | U   | N   | Y   | 46     |
| Zänker 2012                          | U  | U  | Y  | Y  | U  | U  | Y  | N  | N  | U   | U   | N   | Y   | 31     |
| Trakoon-osot 2013                    | U  | U  | Y  | U  | U  | U  | Y  | Y  | Y  | Y   | U   | N   | Y   | 46     |
| Rahman 2015                          | U  | U  | N  | U  | U  | U  | Y  | N  | N  | Y   | U   | N   | Y   | 23     |
| Suthar 2016a                         | U  | U  | N  | N  | N  | N  | U  | N  | N  | U   | U   | N   | Y   | 8      |
| Suthar 2016b                         | U  | U  | N  | N  | N  | N  | Y  | N  | N  | U   | U   | N   | Y   | 15     |
| Cortez-Navarrete 2018                | U  | U  | N  | Y  | U  | U  | Y  | N  | N  | Y   | U   | N   | Y   | 31     |
| Kumari 2018                          | Y  | U  | N  | U  | U  | U  | Y  | Y  | Y  | Y   | U   | N   | Y   | 46     |
| Amini 2020                           | U  | U  | Y  | Y  | U  | U  | U  | N  | N  | Y   | U   | N   | Y   | 31     |
| Kim 2020                             | U  | U  | N  | U  | U  | U  | U  | N  | N  | U   | U   | N   | Y   | 8      |
| <b><i>Nigella sativa</i></b>         |    |    |    |    |    |    |    |    |    |     |     |     |     |        |
| Najmi 2012                           | U  | U  | N  | N  | N  | N  | Y  | U  | Y  | U   | U   | N   | Y   | 23     |
| Hosseini 2013                        | U  | U  | Y  | U  | U  | U  | Y  | Y  | Y  | Y   | U   | N   | Y   | 46     |
| Hadi 2015                            | U  | U  | N  | U  | U  | U  | Y  | N  | N  | U   | U   | N   | Y   | 15     |
| Heshmati 2015                        | Y  | U  | N  | Y  | U  | U  | U  | N  | Y  | Y   | U   | N   | Y   | 38     |
| Kaatabi 2015                         | Y  | U  | N  | Y  | U  | U  | Y  | N  | N  | Y   | U   | N   | Y   | 38     |
| Moustafa 2019                        | Y  | U  | N  | N  | N  | N  | Y  | N  | N  | U   | U   | N   | Y   | 23     |
| Kooshki 2020                         | U  | U  | N  | Y  | U  | U  | Y  | U  | U  | U   | U   | N   | Y   | 23     |
| Jangjo-Borazjani 2021                | U  | U  | N  | Y  | U  | U  | U  | U  | Y  | Y   | U   | N   | Y   | 31     |
| <b><i>Plantago ovata</i></b>         |    |    |    |    |    |    |    |    |    |     |     |     |     |        |
| Ziai 2005                            | U  | U  | N  | U  | U  | U  | Y  | N  | N  | Y   | U   | N   | Y   | 23     |
| Feinglos 2013                        | U  | U  | N  | U  | U  | U  | Y  | N  | U  | U   | U   | N   | Y   | 15     |
| Abutair 2016                         | U  | U  | N  | U  | U  | U  | U  | N  | N  | Y   | U   | N   | Y   | 15     |
| <b><i>Portulaca oleracea</i></b>     |    |    |    |    |    |    |    |    |    |     |     |     |     |        |
| El-Sayed 2011                        | U  | U  | N  | U  | U  | U  | U  | U  | U  | Y   | U   | N   | Y   | 15     |
| Farzanegi 2014                       | U  | U  | N  | U  | U  | U  | U  | U  | U  | Y   | U   | N   | U   | 8      |
| Dehghan 2016                         | U  | U  | N  | U  | U  | U  | U  | U  | U  | Y   | U   | N   | Y   | 15     |
| Wainstein 2016                       | Y  | U  | N  | Y  | U  | U  | U  | N  | Y  | Y   | U   | N   | Y   | 38     |
| <b><i>Pterocarpus marsupium</i></b>  |    |    |    |    |    |    |    |    |    |     |     |     |     |        |
| Hariharan 2005                       | U  | U  | Y  | Y  | Y  | U  | Y  | N  | N  | Y   | U   | U   | Y   | 46     |
| <b><i>Punica granatum</i></b>        |    |    |    |    |    |    |    |    |    |     |     |     |     |        |
| Faghihimani 2016                     | U  | U  | N  | U  | U  | U  | Y  | N  | N  | Y   | U   | N   | Y   | 23     |
| Babaeian 2013                        | U  | U  | Y  | U  | U  | U  | Y  | N  | N  | Y   | U   | N   | Y   | 31     |
| Sohrab 2014, Sohrab 2015             | U  | U  | N  | U  | U  | U  | Y  | N  | N  | Y   | U   | N   | Y   | 23     |
| Khajebishak 2019a, Khajebishak 2019b | U  | U  | N  | Y  | U  | U  | U  | N  | N  | Y   | U   | N   | Y   | 23     |
| Grabež 2020                          | U  | U  | N  | Y  | U  | U  | Y  | Y  | Y  | Y   | U   | N   | Y   | 46     |
| Hashemi 2020                         | Y  | U  | N  | U  | Y  | U  | Y  | N  | N  | U   | U   | N   | Y   | 31     |

| Author and year                               | Q1 | Q2 | Q3 | Q4 | Q5 | Q6 | Q7 | Q8 | Q9 | Q10 | Q11 | Q12 | Q13 | % of Y |
|-----------------------------------------------|----|----|----|----|----|----|----|----|----|-----|-----|-----|-----|--------|
| <b><i>Sesamum indicum</i></b>                 |    |    |    |    |    |    |    |    |    |     |     |     |     |        |
| Shahi 2017                                    | U  | U  | N  | U  | U  | U  | U  | N  | N  | Y   | U   | N   | Y   | 15     |
| Aslam 2018                                    | U  | U  | N  | U  | U  | U  | Y  | N  | N  | Y   | U   | N   | Y   | 23     |
| <b><i>Shilajit</i></b>                        |    |    |    |    |    |    |    |    |    |     |     |     |     |        |
| Narasimha Raju 2016                           | U  | U  | N  | U  | U  | U  | U  | N  | N  | U   | U   | N   | Y   | 8      |
| Niranjan 2016                                 | U  | U  | Y  | U  | U  | U  | U  | Y  | Y  | U   | U   | N   | Y   | 31     |
| <b><i>Syzygium cumini</i></b>                 |    |    |    |    |    |    |    |    |    |     |     |     |     |        |
| Sahana 2010                                   | Y  | U  | N  | N  | N  | N  | Y  | N  | U  | U   | U   | N   | Y   | 23     |
| Sidana 2016, Sidana 2017                      | U  | U  | N  | U  | U  | U  | Y  | N  | N  | U   | U   | N   | Y   | 15     |
| <b><i>Terminalia chebula</i></b>              |    |    |    |    |    |    |    |    |    |     |     |     |     |        |
| Usharani 2020                                 | Y  | U  | N  | Y  | Y  | U  | U  | Y  | Y  | U   | U   | N   | Y   | 46     |
| <b><i>Tinospora cordifolia</i></b>            |    |    |    |    |    |    |    |    |    |     |     |     |     |        |
| Mishra 2015                                   | U  | U  | N  | U  | U  | U  | Y  | U  | U  | Y   | U   | N   | Y   | 23     |
| Roy 2015                                      | U  | U  | N  | N  | N  | N  | Y  | U  | U  | U   | U   | N   | Y   | 15     |
| <b><i>Tribulus terrestris</i></b>             |    |    |    |    |    |    |    |    |    |     |     |     |     |        |
| Samani 2016                                   | U  | U  | N  | Y  | Y  | U  | Y  | N  | N  | Y   | U   | N   | Y   | 38     |
| <b><i>Trigonella foenum-graecum</i></b>       |    |    |    |    |    |    |    |    |    |     |     |     |     |        |
| Gupta 2001                                    | U  | U  | N  | U  | U  | U  | U  | U  | Y  | U   | U   | N   | Y   | 15     |
| Lu 2008                                       | Y  | U  | N  | Y  | U  | U  | Y  | Y  | Y  | Y   | U   | N   | Y   | 54     |
| Ansari 2011                                   | Y  | U  | U  | U  | U  | U  | U  | N  | N  | U   | U   | U   | Y   | 15     |
| Rafrat 2014                                   | Y  | U  | N  | U  | U  | U  | Y  | N  | N  | Y   | U   | N   | Y   | 31     |
| Suchitra 2015                                 | U  | U  | Y  | U  | U  | U  | U  | Y  | Y  | U   | U   | N   | Y   | 31     |
| Kaur 2016                                     | Y  | U  | U  | N  | N  | N  | Y  | Y  | Y  | U   | U   | N   | Y   | 38     |
| Singh 2016                                    | U  | U  | N  | N  | N  | N  | U  | Y  | Y  | Y   | U   | N   | Y   | 31     |
| Verma 2016                                    | Y  | U  | U  | U  | U  | U  | Y  | U  | U  | Y   | U   | N   | Y   | 31     |
| Ranade 2017                                   | Y  | U  | Y  | N  | U  | U  | Y  | U  | U  | U   | U   | N   | Y   | 31     |
| Gholaman 2018                                 | U  | U  | N  | U  | U  | U  | Y  | Y  | Y  | U   | U   | N   | U   | 23     |
| Kandhare 2018                                 | Y  | U  | N  | Y  | U  | U  | Y  | N  | N  | U   | U   | N   | Y   | 31     |
| Hassani 2019                                  | U  | U  | N  | U  | U  | U  | Y  | N  | N  | Y   | U   | N   | Y   | 23     |
| Hota 2019                                     | U  | U  | Y  | N  | N  | N  | Y  | U  | U  | U   | U   | U   | Y   | 23     |
| Najdi 2019                                    | Y  | Y  | N  | N  | N  | N  | Y  | N  | N  | U   | U   | N   | Y   | 31     |
| Rashid 2019                                   | U  | U  | N  | U  | U  | U  | Y  | Y  | Y  | U   | U   | N   | Y   | 31     |
| Hadi 2020                                     | U  | U  | N  | U  | U  | Y  | Y  | N  | N  | Y   | U   | N   | Y   | 31     |
| <b><i>Urtica dioica</i></b>                   |    |    |    |    |    |    |    |    |    |     |     |     |     |        |
| Namazi 2011, Esfanjani 2012a, Esfanjani 2012b | U  | U  | N  | U  | U  | U  | Y  | N  | N  | Y   | U   | N   | Y   | 23     |
| Kianbakht 2013                                | Y  | Y  | N  | Y  | Y  | N  | Y  | N  | N  | Y   | U   | N   | Y   | 54     |
| Khajeh-Mehrizi 2014                           | U  | U  | N  | U  | U  | U  | Y  | N  | N  | Y   | U   | N   | Y   | 23     |
| Dabagh 2016                                   | U  | U  | Y  | U  | U  | U  | U  | U  | U  | Y   | U   | N   | U   | 15     |
| Hassani 2016                                  | U  | U  | N  | U  | U  | U  | U  | N  | N  | Y   | U   | N   | Y   | 15     |
| Dadvar 2017                                   | U  | U  | N  | U  | U  | U  | U  | U  | U  | Y   | U   | N   | U   | 8      |
| Ghalavand 2017                                | U  | U  | Y  | U  | U  | U  | U  | U  | U  | Y   | U   | N   | U   | 15     |
| Korani 2017                                   | U  | U  | N  | U  | U  | U  | U  | N  | N  | Y   | U   | N   | Y   | 15     |
| Mohammadnia 2017                              | U  | U  | U  | U  | U  | U  | U  | N  | N  | Y   | U   | N   | U   | 8      |
| <b><i>Vernonia cinerea</i></b>                |    |    |    |    |    |    |    |    |    |     |     |     |     |        |
| Sayeed 2013                                   | Y  | U  | N  | Y  | U  | U  | Y  | U  | U  | Y   | U   | N   | Y   | 38     |

| Author and year                                                                                                                                                                  | Q1 | Q2 | Q3 | Q4 | Q5 | Q6 | Q7 | Q8 | Q9 | Q10 | Q11 | Q12 | Q13 | % of Y |
|----------------------------------------------------------------------------------------------------------------------------------------------------------------------------------|----|----|----|----|----|----|----|----|----|-----|-----|-----|-----|--------|
| <b>Withania coagulans</b>                                                                                                                                                        |    |    |    |    |    |    |    |    |    |     |     |     |     |        |
| Hemalatha 2018                                                                                                                                                                   | U  | U  | U  | U  | U  | U  | Y  | U  | U  | Y   | U   | N   | Y   | 23     |
| <b>Withania somnifera</b>                                                                                                                                                        |    |    |    |    |    |    |    |    |    |     |     |     |     |        |
| Usharani 2014                                                                                                                                                                    | U  | U  | N  | Y  | U  | U  | U  | N  | N  | U   | U   | N   | Y   | 15     |
| <b>Zingiber officinale</b>                                                                                                                                                       |    |    |    |    |    |    |    |    |    |     |     |     |     |        |
| Mahluji 2013                                                                                                                                                                     | U  | U  | N  | Y  | U  | U  | Y  | N  | N  | Y   | U   | N   | Y   | 31     |
| Arablou 2014a, Arablou 2014b                                                                                                                                                     | U  | U  | N  | Y  | U  | U  | Y  | N  | N  | Y   | U   | N   | Y   | 31     |
| Mozaffari-Khosravi 2014, Talaei 2017, Talaei 2018                                                                                                                                | Y  | U  | N  | Y  | U  | U  | Y  | N  | N  | U   | U   | N   | Y   | 31     |
| Shidfar 2015                                                                                                                                                                     | U  | U  | N  | Y  | U  | U  | Y  | N  | N  | Y   | U   | N   | Y   | 31     |
| Arzati 2017, Zarezadeh 2018                                                                                                                                                      | U  | U  | N  | Y  | U  | U  | Y  | N  | N  | Y   | U   | N   | Y   | 31     |
| Mohammadi 2017, Mohammadi 2019                                                                                                                                                   | U  | U  | N  | U  | U  | U  | U  | U  | Y  | Y   | U   | N   | U   | 15     |
| Carvalho 2020                                                                                                                                                                    | Y  | U  | N  | Y  | U  | U  | Y  | N  | N  | Y   | U   | N   | Y   | 38     |
| Gholinezhad 2020                                                                                                                                                                 | U  | U  | N  | Y  | U  | U  | U  | N  | N  | Y   | U   | N   | Y   | 23     |
| <b>Ziziphus mauritiana</b>                                                                                                                                                       |    |    |    |    |    |    |    |    |    |     |     |     |     |        |
| Yazdanpanah 2017                                                                                                                                                                 | Y  | U  | N  | U  | U  | Y  | Y  | N  | N  | Y   | U   | N   | Y   | 38     |
| <b>Acalypha indica/Allium cepa/Allium sativum/Azadirachta indica/Mangifera indica/Murraya koenigii/Musa sapientum/Ocimum tenuiflorum/Phyllanthus amarus/Tinospora cordifolia</b> |    |    |    |    |    |    |    |    |    |     |     |     |     |        |
| Balasubramaniam 2010                                                                                                                                                             | Y  | U  | U  | U  | U  | U  | Y  | Y  | Y  | Y   | U   | N   | Y   | 46     |
| <b>Allium sativum; Cuminum cyminum</b>                                                                                                                                           |    |    |    |    |    |    |    |    |    |     |     |     |     |        |
| Mansouri 2018                                                                                                                                                                    | U  | U  | N  | U  | U  | U  | U  | U  | U  | U   | U   | N   | Y   | 8      |
| <b>Aloe vera; Pterocarpus marsupium; Aloe vera+Pterocarpus marsupium</b>                                                                                                         |    |    |    |    |    |    |    |    |    |     |     |     |     |        |
| Maurya 2017                                                                                                                                                                      | N  | U  | N  | U  | N  | N  | Y  | N  | N  | U   | U   | N   | N   | 8      |
| <b>Cinnamomum verum; Crocus sativus; Elettaria cardamomum; Zingiber officinale</b>                                                                                               |    |    |    |    |    |    |    |    |    |     |     |     |     |        |
| Azimi 2014, Azimi 2016                                                                                                                                                           | U  | U  | N  | U  | U  | U  | U  | N  | N  | Y   | U   | N   | Y   | 15     |
| <b>Enicostemma axillare; Shilajit</b>                                                                                                                                            |    |    |    |    |    |    |    |    |    |     |     |     |     |        |
| Kumar 2014                                                                                                                                                                       | U  | U  | N  | U  | U  | U  | U  | N  | N  | U   | U   | N   | U   | 0      |
| <b>Enicostemma axillare+Embllica officinalis+Tinospora cordifolia</b>                                                                                                            |    |    |    |    |    |    |    |    |    |     |     |     |     |        |
| Sharma 2019                                                                                                                                                                      | U  | U  | N  | N  | N  | N  | Y  | N  | N  | U   | U   | N   | Y   | 15     |
| <b>Linum usitatissimum; Plantago ovata</b>                                                                                                                                       |    |    |    |    |    |    |    |    |    |     |     |     |     |        |
| Ricklefs-Johnson 2017                                                                                                                                                            | Y  | U  | N  | U  | U  | U  | Y  | N  | N  | Y   | U   | N   | Y   | 31     |
| <b>Syzygium cumini+Withania coagulans</b>                                                                                                                                        |    |    |    |    |    |    |    |    |    |     |     |     |     |        |
| Siddiqui 2017                                                                                                                                                                    | Y  | U  | Y  | N  | N  | N  | U  | N  | N  | U   | U   | N   | Y   | 23     |
| <b>Trigonella foenum-graecum; Aegle marmelos; Trigonella foenum-graecum+Aegle marmelos</b>                                                                                       |    |    |    |    |    |    |    |    |    |     |     |     |     |        |
| Yaheya 2009                                                                                                                                                                      | U  | U  | U  | U  | U  | U  | U  | Y  | Y  | Y   | U   | N   | Y   | 31     |
| <b>Ayurvedic medicine- combination of plant- and/or mineral-origin ingredients§</b>                                                                                              |    |    |    |    |    |    |    |    |    |     |     |     |     |        |
| <b>AYUBES</b>                                                                                                                                                                    |    |    |    |    |    |    |    |    |    |     |     |     |     |        |
| Godatwar 2019                                                                                                                                                                    | Y  | U  | N  | Y  | U  | U  | N  | U  | N  | U   | U   | N   | Y   | 23     |
| <b>BGR-34</b>                                                                                                                                                                    |    |    |    |    |    |    |    |    |    |     |     |     |     |        |
| Gupta 2018                                                                                                                                                                       | U  | U  | N  | U  | U  | U  | U  | N  | N  | U   | U   | N   | Y   | 8      |
| <b>Bilvadi Churna; Kiratadi Churna</b>                                                                                                                                           |    |    |    |    |    |    |    |    |    |     |     |     |     |        |
| Kumari 2016                                                                                                                                                                      | U  | U  | N  | U  | U  | U  | U  | U  | U  | U   | U   | N   | Y   | 8      |
| <b>CardiPro</b>                                                                                                                                                                  |    |    |    |    |    |    |    |    |    |     |     |     |     |        |
| Fatima 2012                                                                                                                                                                      | U  | U  | N  | Y  | U  | U  | U  | N  | N  | U   | U   | N   | Y   | 15     |
| <b>Cogent db</b>                                                                                                                                                                 |    |    |    |    |    |    |    |    |    |     |     |     |     |        |
| Shekhar 2002                                                                                                                                                                     | U  | U  | N  | U  | U  | U  | Y  | N  | N  | U   | U   | N   | U   | 8      |
| <b>DCBT 2345</b>                                                                                                                                                                 |    |    |    |    |    |    |    |    |    |     |     |     |     |        |

| Author and year                                                                                                          | Q1 | Q2 | Q3 | Q4 | Q5 | Q6 | Q7 | Q8 | Q9 | Q10 | Q11 | Q12 | Q13 | % of Y |
|--------------------------------------------------------------------------------------------------------------------------|----|----|----|----|----|----|----|----|----|-----|-----|-----|-----|--------|
| Mohan 2001                                                                                                               | U  | U  | N  | Y  | U  | U  | Y  | N  | N  | Y   | U   | N   | Y   | 31     |
| <b>Diabetea tea</b>                                                                                                      |    |    |    |    |    |    |    |    |    |     |     |     |     |        |
| Mahmoud 2016                                                                                                             | U  | U  | N  | U  | U  | U  | Y  | N  | N  | Y   | U   | N   | Y   | 23     |
| <b>Emblica officinalis; Withania somnifera; Emblica officinalis, Withania somnifera</b>                                  |    |    |    |    |    |    |    |    |    |     |     |     |     |        |
| Usharani 2014                                                                                                            | U  | U  | Y  | U  | U  | U  | U  | N  | N  | U   | U   | N   | Y   | 15     |
| <b>Herbal combination</b>                                                                                                |    |    |    |    |    |    |    |    |    |     |     |     |     |        |
| Shokoohi 2017                                                                                                            | U  | U  | N  | Y  | Y  | U  | Y  | N  | Y  | Y   | U   | N   | Y   | 46     |
| <b>Hyponidd</b>                                                                                                          |    |    |    |    |    |    |    |    |    |     |     |     |     |        |
| Poongothai 2002                                                                                                          | U  | U  | N  | Y  | U  | U  | Y  | N  | N  | Y   | U   | N   | Y   | 31     |
| <b>Inolter</b>                                                                                                           |    |    |    |    |    |    |    |    |    |     |     |     |     |        |
| Agrawal 2002                                                                                                             | U  | U  | Y  | Y  | U  | U  | Y  | Y  | Y  | Y   | U   | N   | Y   | 54     |
| <b>Kalpita</b>                                                                                                           |    |    |    |    |    |    |    |    |    |     |     |     |     |        |
| Agarwal 2013                                                                                                             | U  | U  | N  | U  | U  | U  | U  | U  | Y  | U   | U   | N   | Y   | 15     |
| <b>Khadira-Kramuka Kashaya Ghanavati; Nishamalaki, Shilajit; Khadira-Kramuka Kashaya Ghanavati+Nishamalaki, Shilajit</b> |    |    |    |    |    |    |    |    |    |     |     |     |     |        |
| Paliwal 2018                                                                                                             | U  | N  | N  | U  | U  | U  | U  | U  | U  | U   | U   | N   | Y   | 8      |
| <b>Lodhradi Kashaya Ghana Vati</b>                                                                                       |    |    |    |    |    |    |    |    |    |     |     |     |     |        |
| Bramhankar 2017                                                                                                          | U  | U  | N  | U  | U  | U  | Y  | N  | N  | U   | U   | N   | Y   | 15     |
| <b>Madhumeha Nashini Gutika; Darvyadi Kwatha; Madhumeha Nashini Gutika+Darvyadi Kwatha</b>                               |    |    |    |    |    |    |    |    |    |     |     |     |     |        |
| Bhawana 2015                                                                                                             | U  | U  | N  | U  | U  | U  | U  | U  | U  | U   | U   | N   | Y   | 8      |
| <b>Mamajjaka Ghana Vati; Tejashiladi Vati</b>                                                                            |    |    |    |    |    |    |    |    |    |     |     |     |     |        |
| Bhagat 2017                                                                                                              | Y  | U  | N  | N  | N  | N  | Y  | N  | N  | U   | U   | N   | Y   | 23     |
| <b>Mamajjaka Ghana Vati; Trikatu Gutika</b>                                                                              |    |    |    |    |    |    |    |    |    |     |     |     |     |        |
| Kataria 2017                                                                                                             | U  | U  | N  | U  | U  | U  | Y  | Y  | Y  | U   | U   | N   | Y   | 31     |
| <b>Mehagni</b>                                                                                                           |    |    |    |    |    |    |    |    |    |     |     |     |     |        |
| Gopalakrishna 2017                                                                                                       | U  | U  | N  | N  | N  | N  | N  | Y  | Y  | Y   | U   | N   | Y   | 31     |
| <b>Mustadi Kwatha Ghana Vati</b>                                                                                         |    |    |    |    |    |    |    |    |    |     |     |     |     |        |
| Kushwaha 2017                                                                                                            | U  | U  | N  | N  | N  | N  | U  | U  | U  | Y   | U   | N   | Y   | 15     |
| <b>Naga Bhasma, Nishamalaki; Nishamalaki, Hordeum vulgare</b>                                                            |    |    |    |    |    |    |    |    |    |     |     |     |     |        |
| Desale 2018                                                                                                              | Y  | U  | N  | U  | U  | U  | Y  | N  | N  | U   | U   | N   | Y   | 23     |
| <b>Nigella sativa, Trigonella foenum-graecum</b>                                                                         |    |    |    |    |    |    |    |    |    |     |     |     |     |        |
| Memon 2010a, Memon 2010b, Memon 2012                                                                                     | U  | U  | N  | N  | N  | N  | Y  | Y  | Y  | Y   | U   | N   | Y   | 38     |
| <b>Nisha Katakadi Kashaya; Yashad Bhasma; Nisha Katakadi Kashaya+Yashad Bhasma</b>                                       |    |    |    |    |    |    |    |    |    |     |     |     |     |        |
| Srinivas 2018                                                                                                            | Y  | U  | Y  | N  | N  | N  | U  | N  | N  | U   | U   | N   | Y   | 23     |
| <b>Pancreas tonic</b>                                                                                                    |    |    |    |    |    |    |    |    |    |     |     |     |     |        |
| Hsia 2004                                                                                                                | U  | U  | N  | Y  | U  | U  | Y  | N  | N  | Y   | U   | N   | Y   | 31     |
| <b>Polyherbal formulation</b>                                                                                            |    |    |    |    |    |    |    |    |    |     |     |     |     |        |
| Awasthi 2015                                                                                                             | Y  | U  | N  | N  | N  | N  | Y  | N  | N  | Y   | U   | N   | Y   | 31     |
| <b>Salasaradi Kashaya+Shilajit+Trivanga Bhasma+Tinospora cordifolia, Azadirachta indica; Hyponidd</b>                    |    |    |    |    |    |    |    |    |    |     |     |     |     |        |
| Bhat 2012                                                                                                                | U  | U  | N  | U  | U  | U  | Y  | N  | N  | U   | U   | N   | Y   | 15     |
| <b>Shilajit; Asanadi Ghana Vati</b>                                                                                      |    |    |    |    |    |    |    |    |    |     |     |     |     |        |
| Gupta 2016^                                                                                                              | U  | U  | U  | U  | U  | U  | U  | N  | N  | U   | U   | N   | Y   | 8      |
| <b>Swarnamakshika Bhasma</b>                                                                                             |    |    |    |    |    |    |    |    |    |     |     |     |     |        |
| Taviad 2016                                                                                                              | Y  | U  | N  | U  | U  | U  | U  | N  | N  | U   | U   | N   | Y   | 15     |
| <b>Talapotaka Churna</b>                                                                                                 |    |    |    |    |    |    |    |    |    |     |     |     |     |        |
| Nille 2018                                                                                                               | U  | U  | N  | U  | U  | U  | U  | N  | N  | U   | U   | N   | Y   | 8      |

| Author and year                                                             | Q1 | Q2 | Q3 | Q4 | Q5 | Q6 | Q7 | Q8 | Q9 | Q10 | Q11 | Q12 | Q13 | % of Y |
|-----------------------------------------------------------------------------|----|----|----|----|----|----|----|----|----|-----|-----|-----|-----|--------|
| <b><i>Trigonella foenum-graecum, Ocimum tenuiflorum</i></b>                 |    |    |    |    |    |    |    |    |    |     |     |     |     |        |
| Mitra 2006                                                                  | U  | U  | U  | U  | U  | U  | Y  | U  | U  | Y   | U   | N   | Y   | 23     |
| <b><i>Triticum aestivum; Nishamalaki, Triticum aestivum+Nishamalaki</i></b> |    |    |    |    |    |    |    |    |    |     |     |     |     |        |
| Samagandi 2012                                                              | U  | U  | N  | U  | U  | U  | U  | Y  | Y  | U   | U   | N   | Y   | 23     |
| <b><i>Vidangadi Yoga</i></b>                                                |    |    |    |    |    |    |    |    |    |     |     |     |     |        |
| Deshpande 2018                                                              | Y  | Y  | N  | N  | N  | N  | U  | N  | N  | U   | U   | N   | Y   | 23     |
| <b><i>Vijaysaradi Ghana Vati; Madhumehari Vati</i></b>                      |    |    |    |    |    |    |    |    |    |     |     |     |     |        |
| Sharma 2018                                                                 | Y  | U  | N  | N  | N  | N  | U  | N  | N  | U   | U   | N   | Y   | 15     |

Y=Yes, N=No, U=Unclear; JBI critical appraisal checklist for RCTs: 1. Was true randomization used for assignment of participants to treatment groups? 2. Was allocation to treatment groups concealed? 3. Were treatment groups similar at the baseline? 4. Were participants blind to treatment assignment? 5. Were those delivering treatment blind to treatment assignment? 6. Were outcomes assessors blind to treatment assignment? 7. Were treatment groups treated identically other than the intervention of interest? 8. Was follow up complete and if not, were differences between groups in terms of their follow up adequately described and analyzed? 9. Were participants analyzed in the groups to which they were randomized? 10. Were outcomes measured in the same way for treatment groups? 11. Were outcomes measured in a reliable way? 12. Was appropriate statistical analysis used? 13. Was the trial design appropriate, and any deviations from the standard RCT design (individual randomization, parallel groups) accounted for in the conduct and analysis of the trial?

§Some of the Ayurvedic medicines contain single plant- or mineral-origin ingredient.

^Extracted only adverse event data.

**Appendix S7: 89 comparisons of Ayurvedic medicines which could not be included in meta-analyses.**

***Abelmoschus esculentus* (Moradi 2020)**

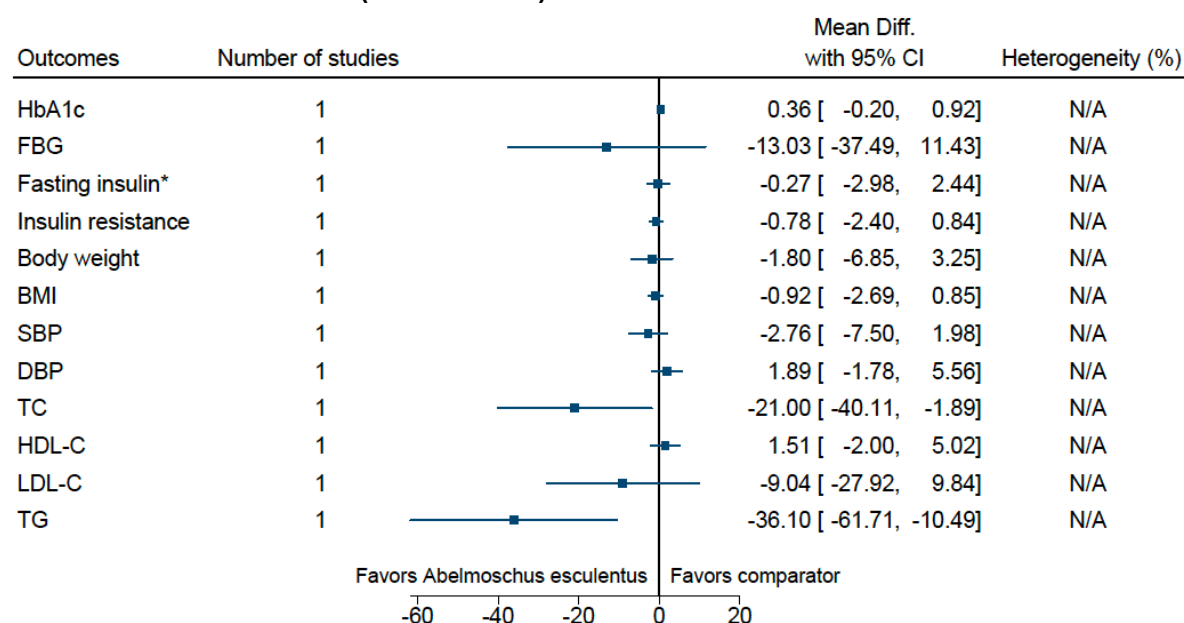

\*Favors intervention/comparator as insulin sensitizer

***Acacia senegal* (Babiker 2017, Babiker 2018)**

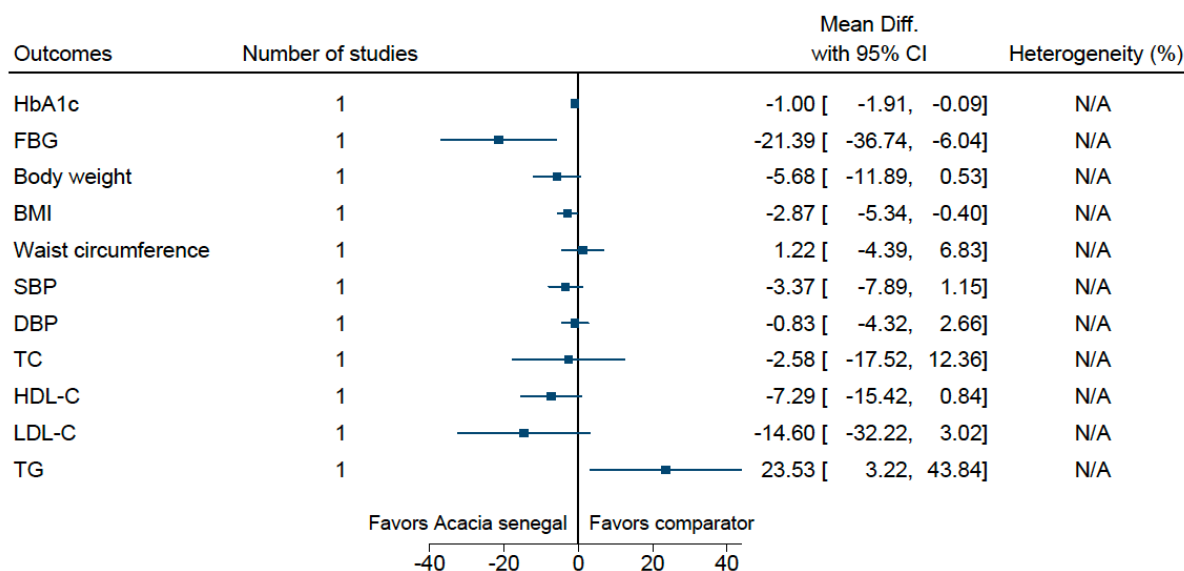



### ***Acalypha indica* (Balasubramaniam 2010)**

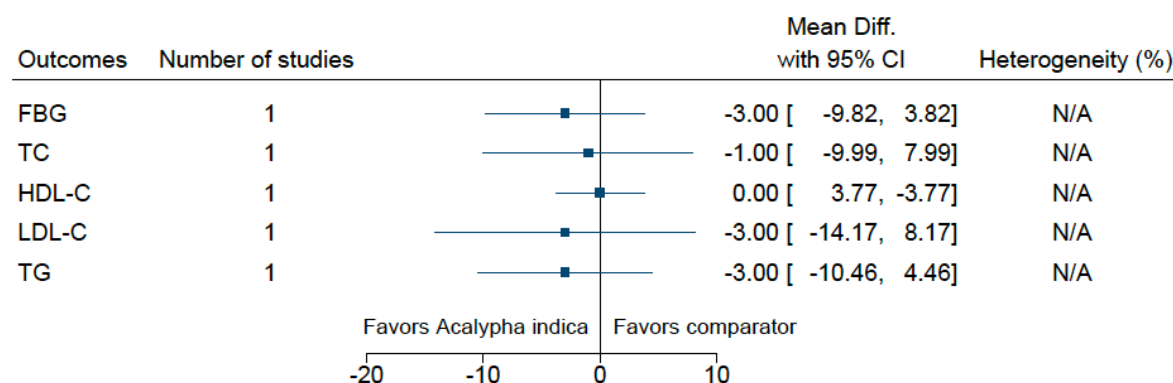

### ***Allium cepa* (Balasubramaniam 2010)**

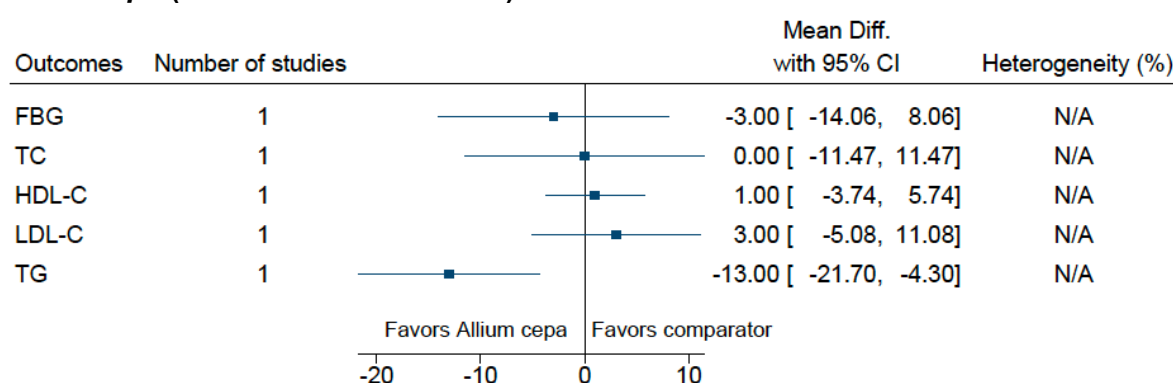

### ***Allium sativum* (versus OAD) (Ashraf 2011a)**

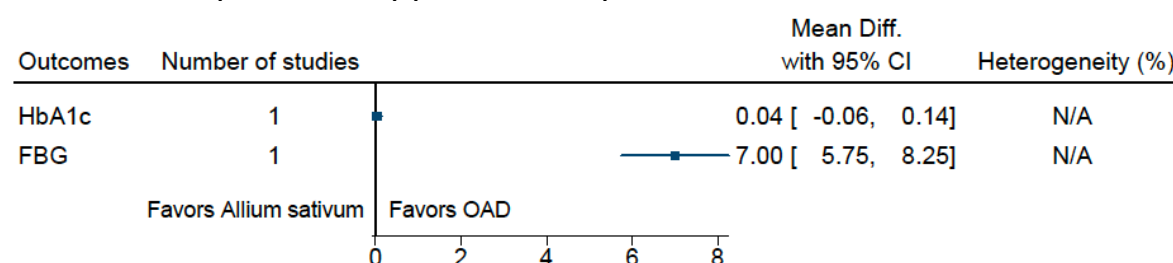

### ***Allium sativum* versus *Cuminum cyminum* (Mansouri 2018)**

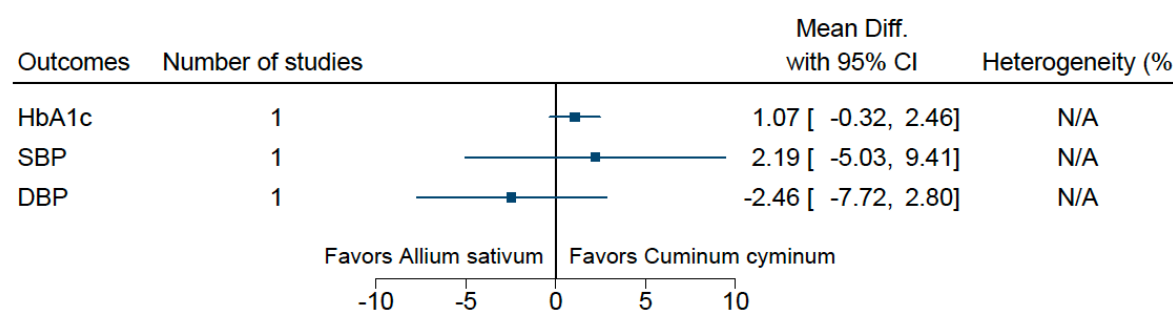

## AYUBES (Godatwar 2019)

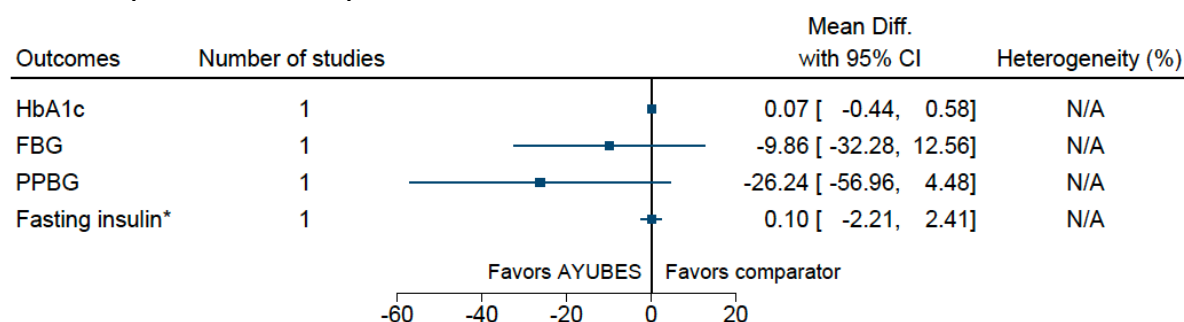

\*Favors intervention/comparator as insulin sensitizer

## Berberis aristata (Sharma 2017)

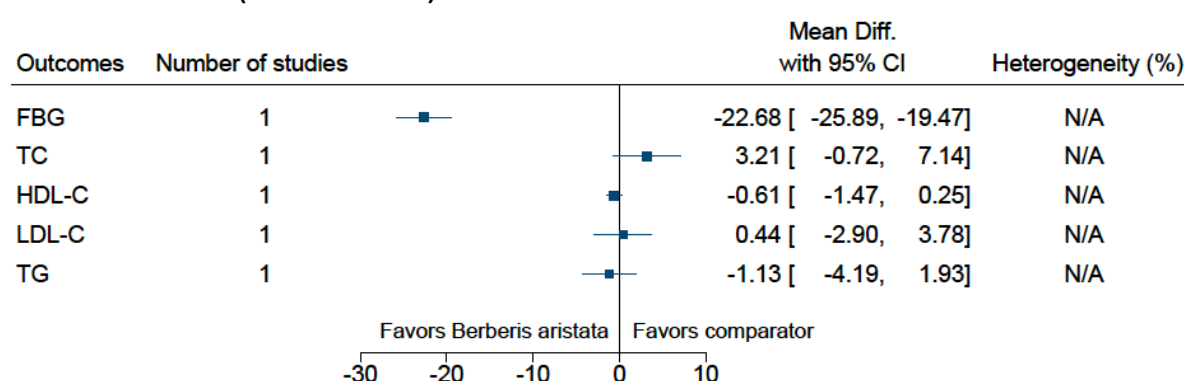

## BGR-34 (Gupta 2018)

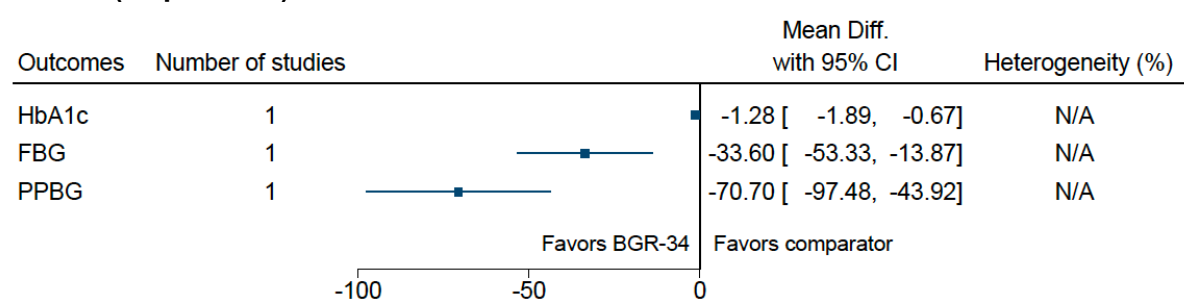

## Bilvadi Churna (Kumari 2016)

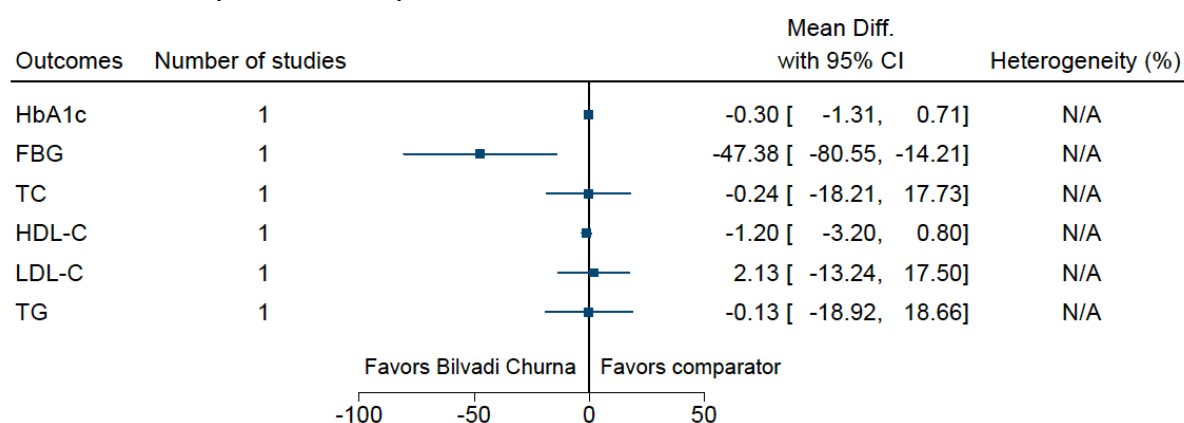

### Bilvadi Churna versus Kiratadi Churna (Kumari 2016)

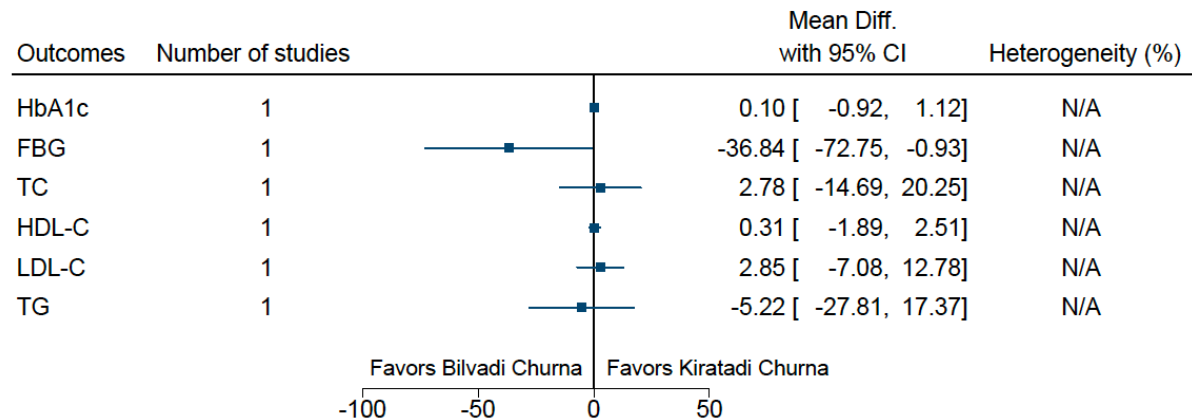

### Capparis spinosa (Huseini 2013)

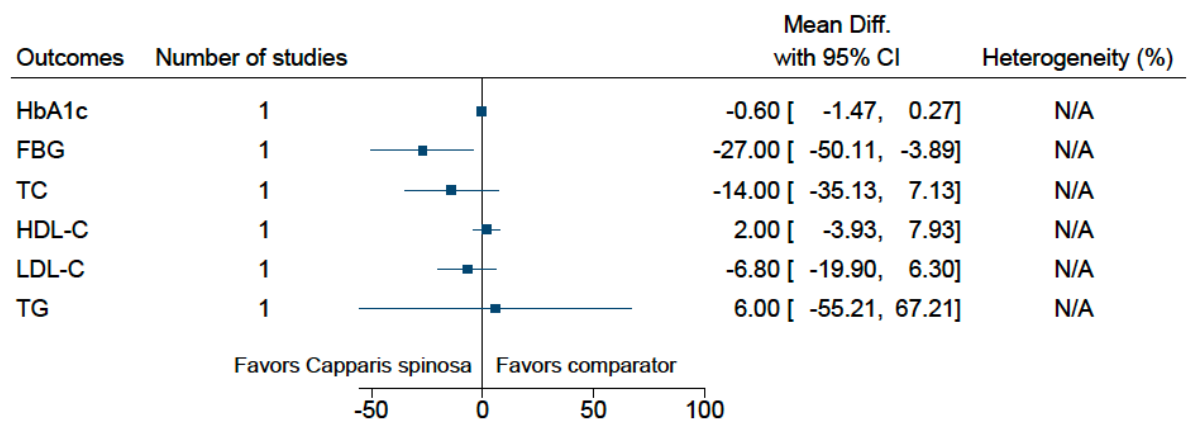

### CardiPro (Fatima 2012)

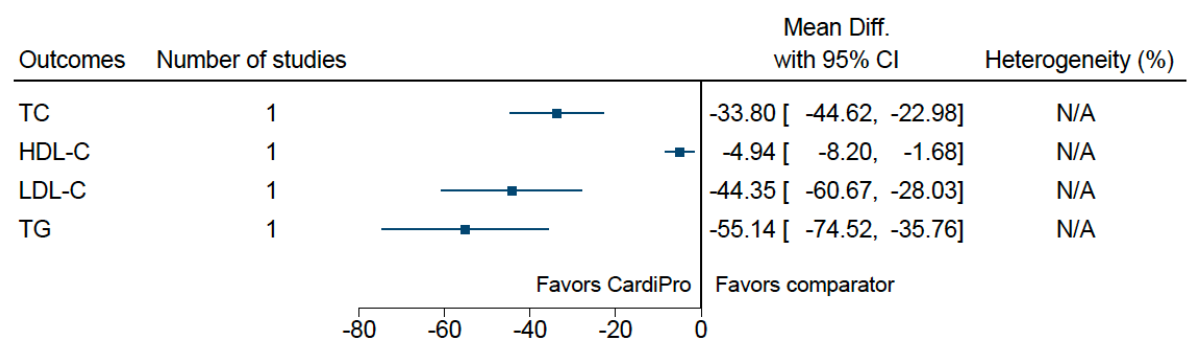

### ***Cichorium intybus* (Chandra 2020)**

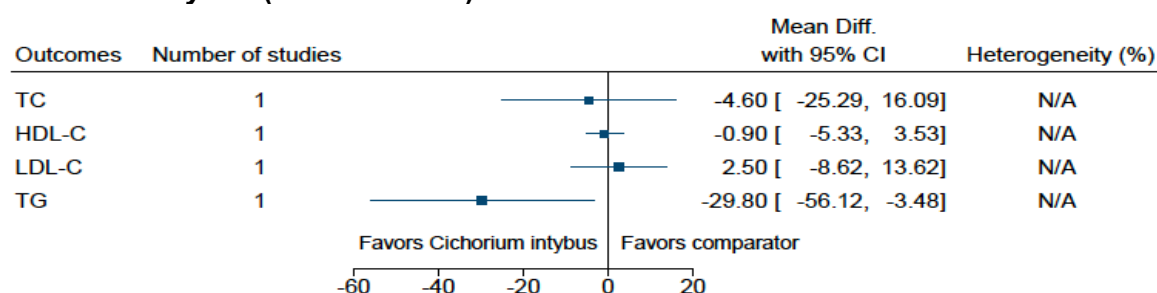

### ***Cinnamomum verum* versus *Crocus sativus* (Azimi 2014, Azimi 2016)**

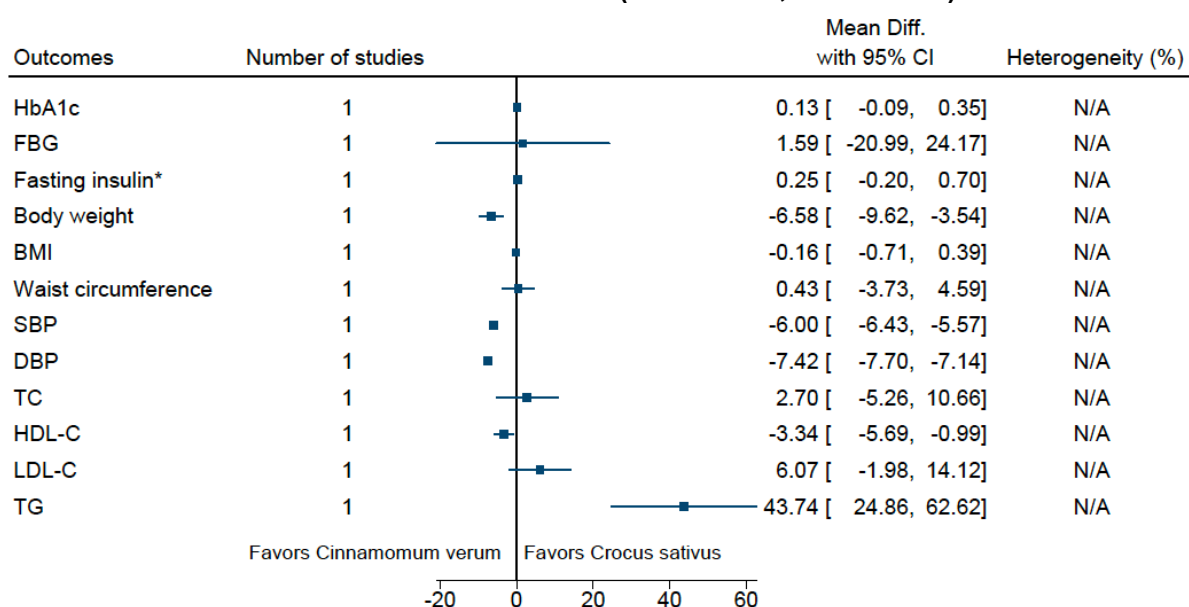

\*Favors intervention/comparator as insulin sensitizer

### ***Cinnamomum verum* versus *Elettaria cardamomum* (Azimi 2014, Azimi 2016)**

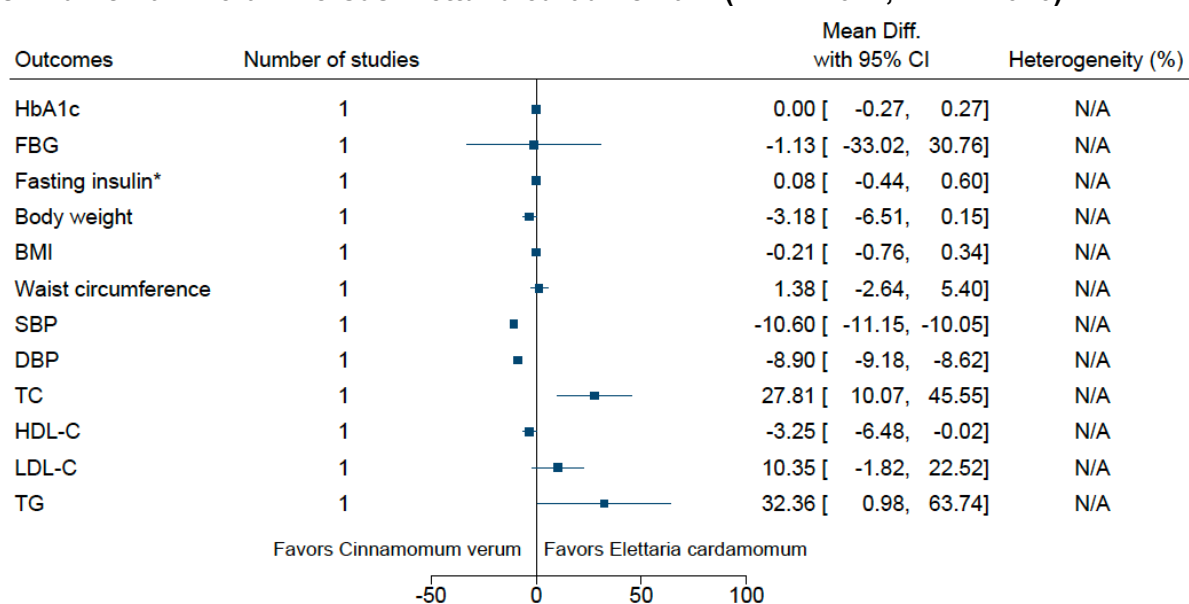

\*Favors intervention/comparator as insulin sensitizer

### ***Cinnamomum verum* versus *Zingiber officinale* (Azimi 2014, Azimi 2016)**

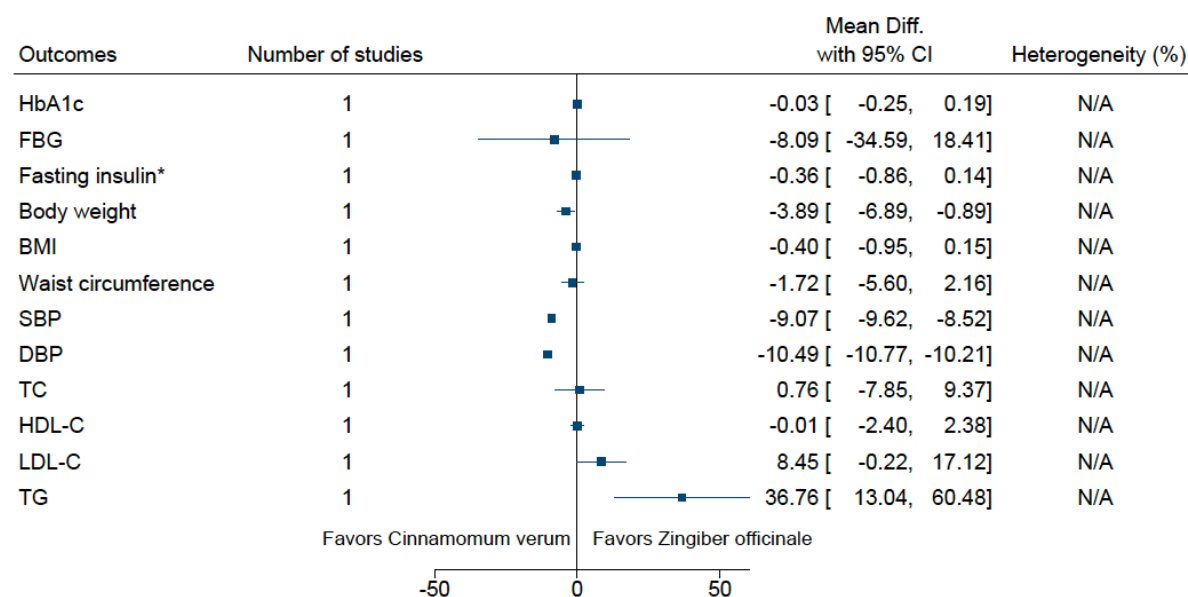

\*Favors intervention/comparator as insulin sensitizer

### ***Coccinia grandis* (versus OAD) (Quamri 2017)**

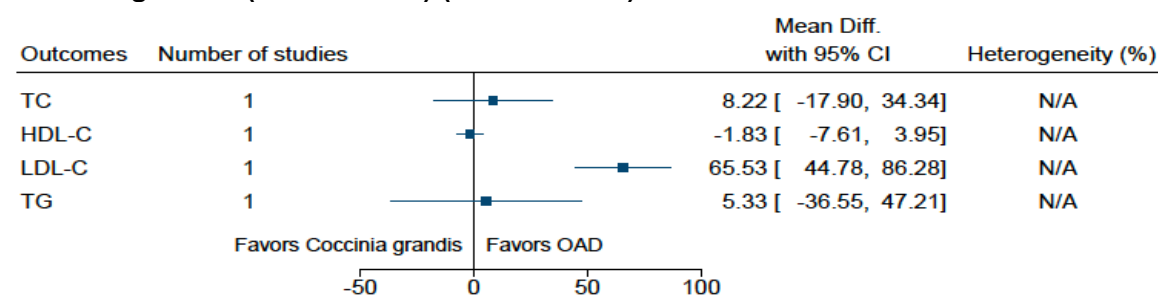

### **Cogent db (Shekhar 2002)**

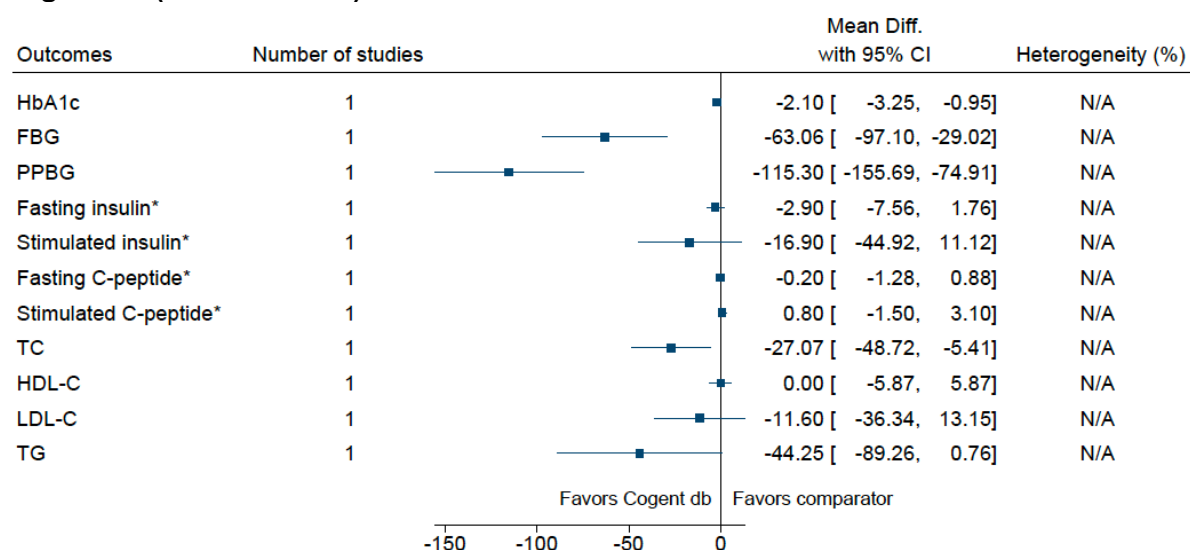

\*Favors intervention/comparator as insulin sensitizer

### ***Convolvulus prostratus* (Patel 2012)**

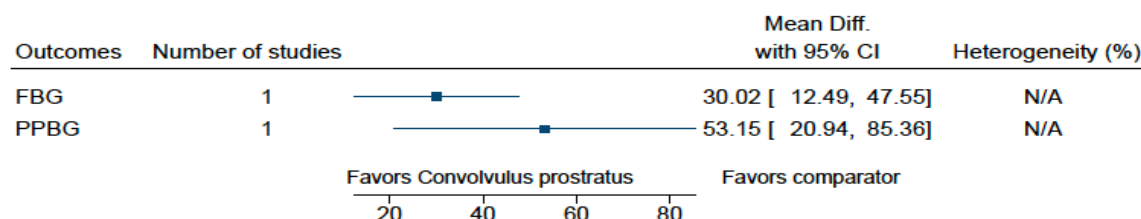

### ***Crocus sativus* versus *Elettaria cardamomum* (Azimi 2014, Azimi 2016)**

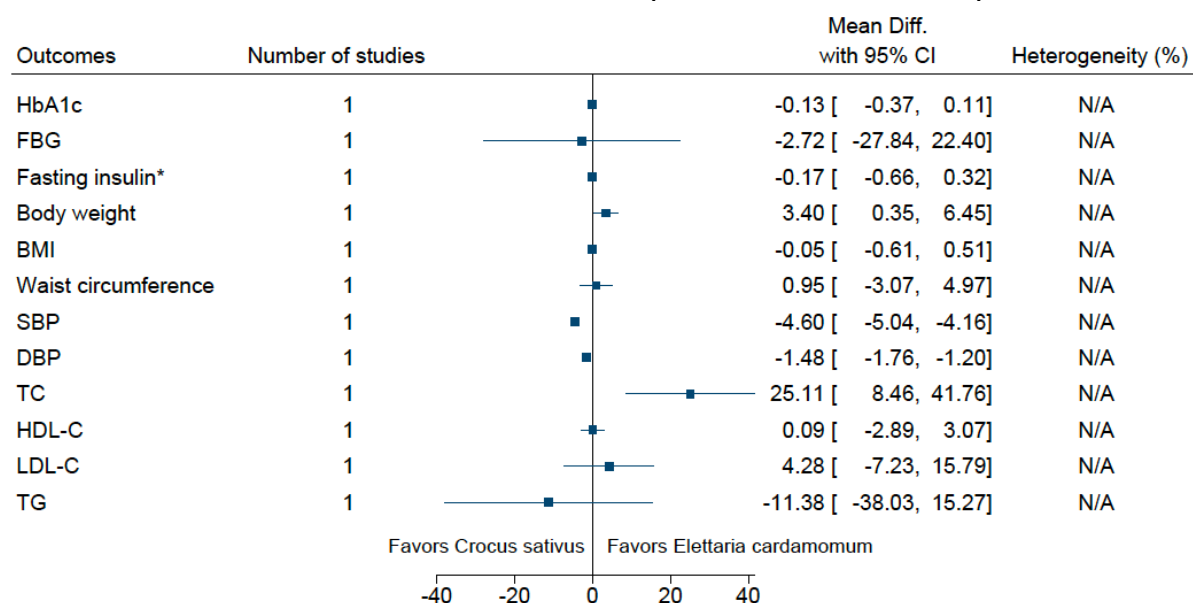

\*Favors intervention/comparator as insulin sensitizer

### ***Crocus sativus* versus *Zingiber officinale* (Azimi 2014, Azimi 2016)**

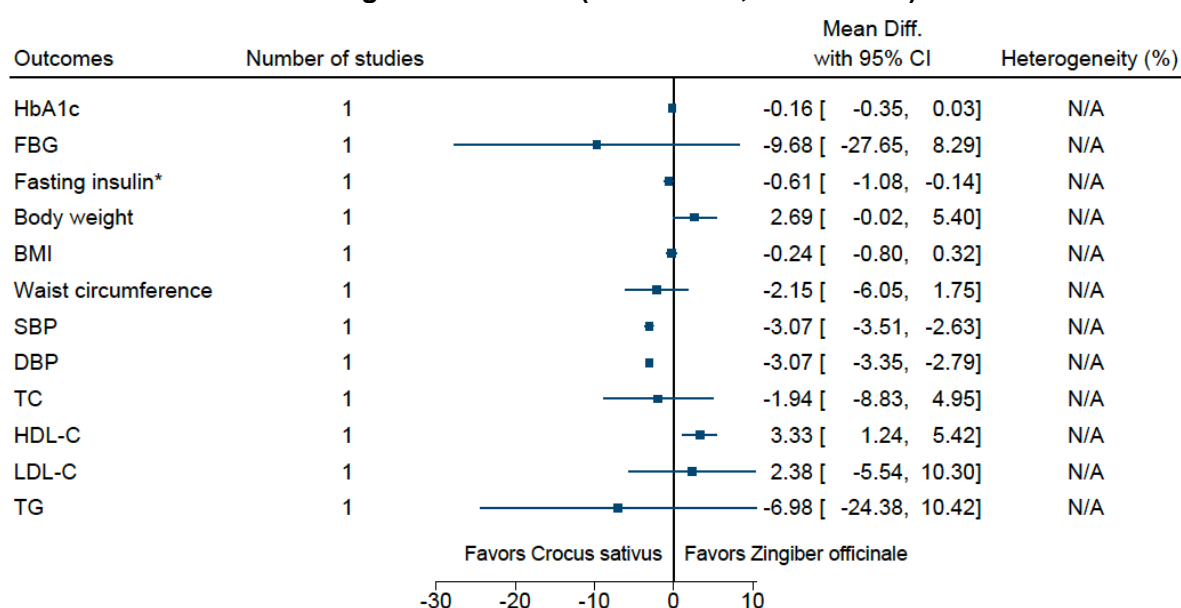

\*Favors intervention/comparator as insulin sensitizer

### Darvyadi Kwatha (Bhawana 2015)

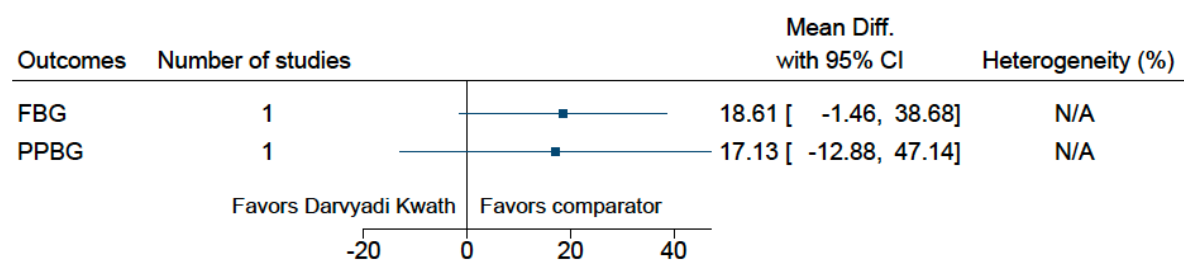

### DCBT 2345 (Mohan 2001)

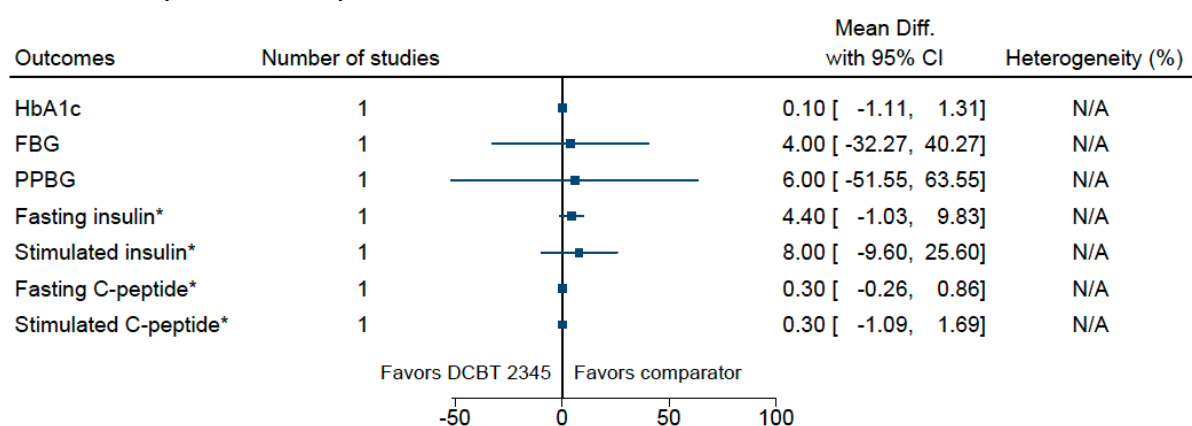

\*Favors intervention/comparator as insulin sensitizer

### Diabetea tea (Mahmoud 2016)

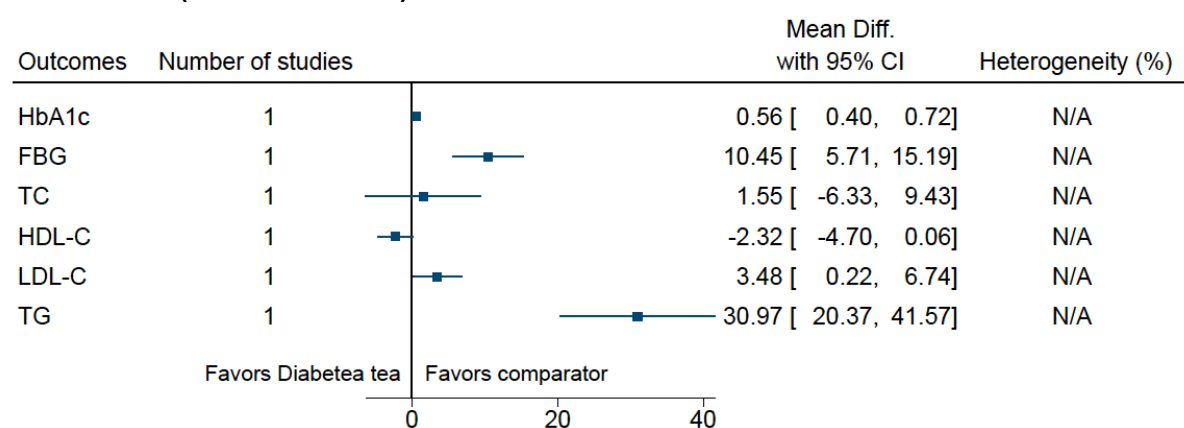

### *Eclipta prostrata* (Sazia 2015a, Sazia 2015b)

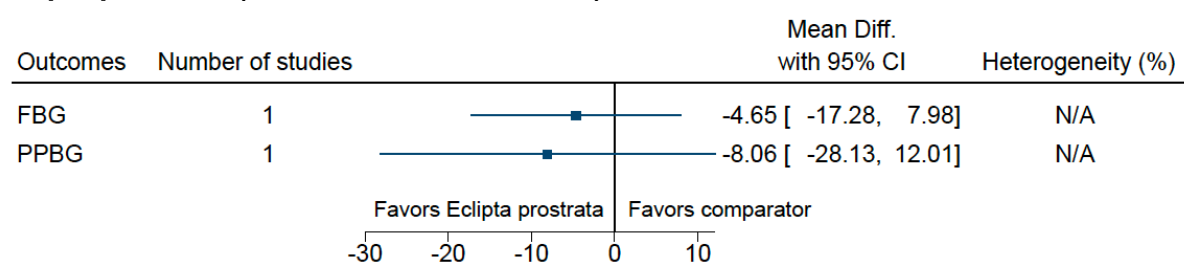

### ***Eclipta prostrata* (versus OAD) (Sazia 2015a, Sazia 2015b)**

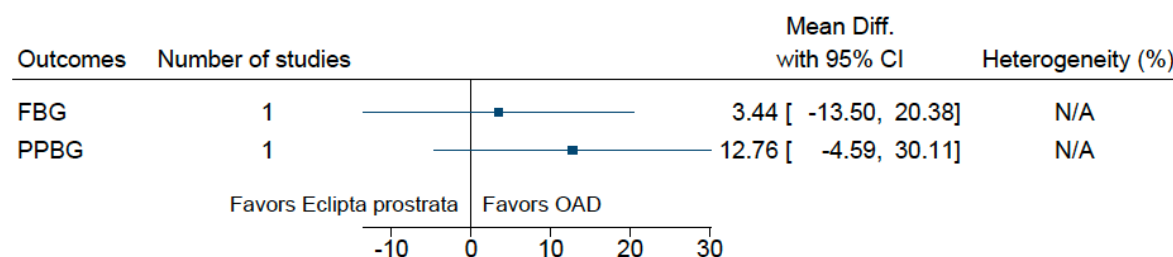

### ***Elettaria cardamomum* versus *Zingiber officinale* (Azimi 2014, Azimi 2016)**

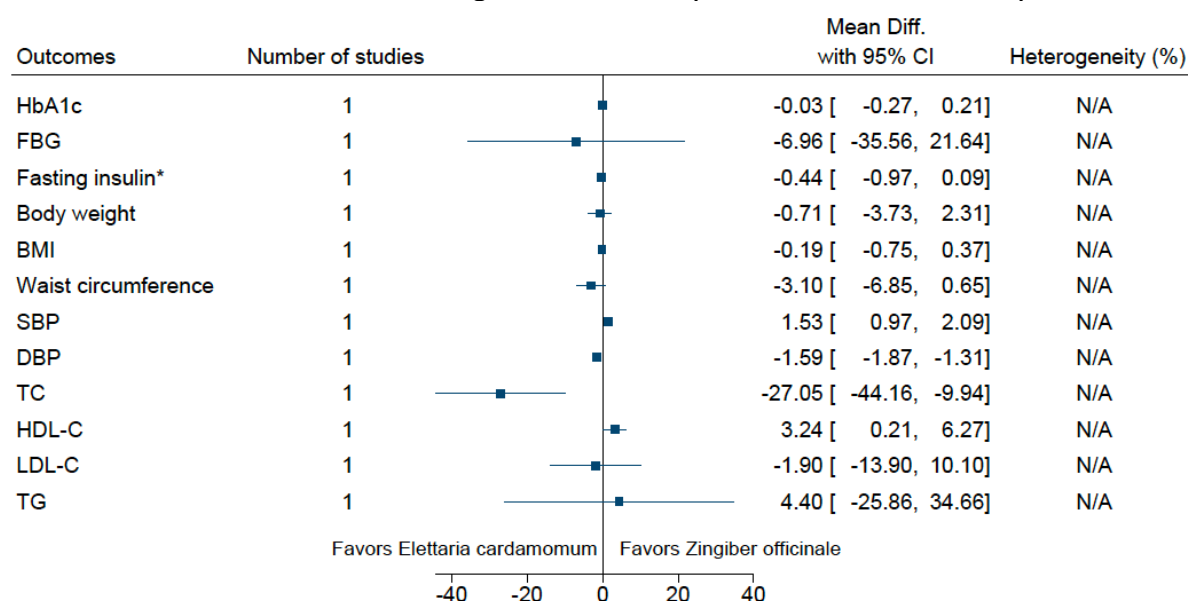

\*Favors intervention/comparator as insulin sensitizer

### ***Emblica officinalis* (Usharani 2013)**

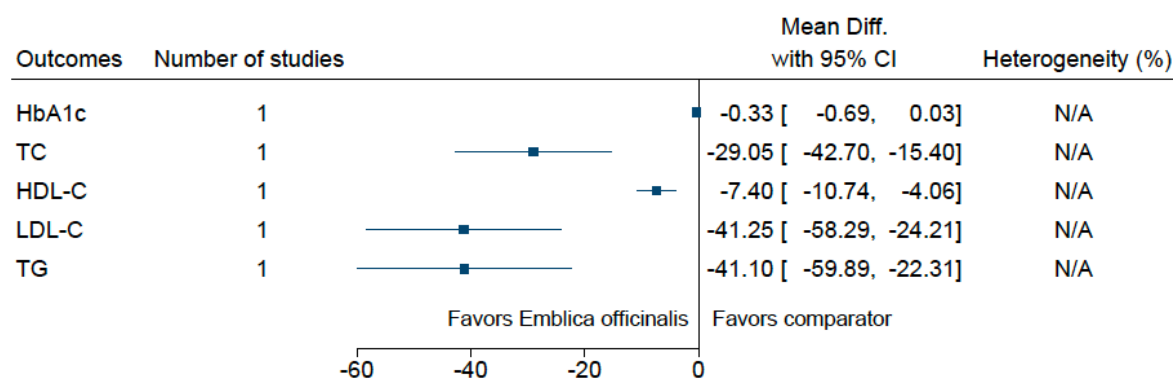



### ***Emblica officinalis* versus *Withania somnifera* (Usharani 2014)**

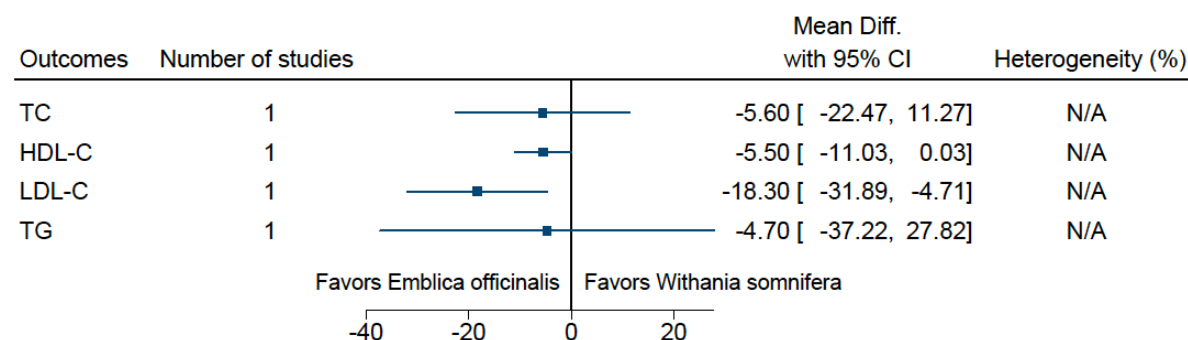

### ***Emblica officinalis*, *Withania somnifera* versus *Emblica officinalis* (Usharani 2014)**

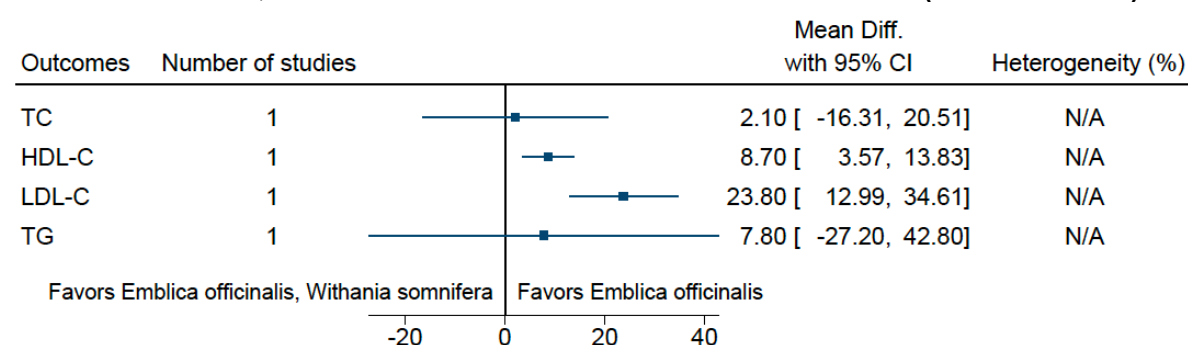

### ***Emblica officinalis*, *Withania somnifera* versus *Withania somnifera* (Usharani 2014)**

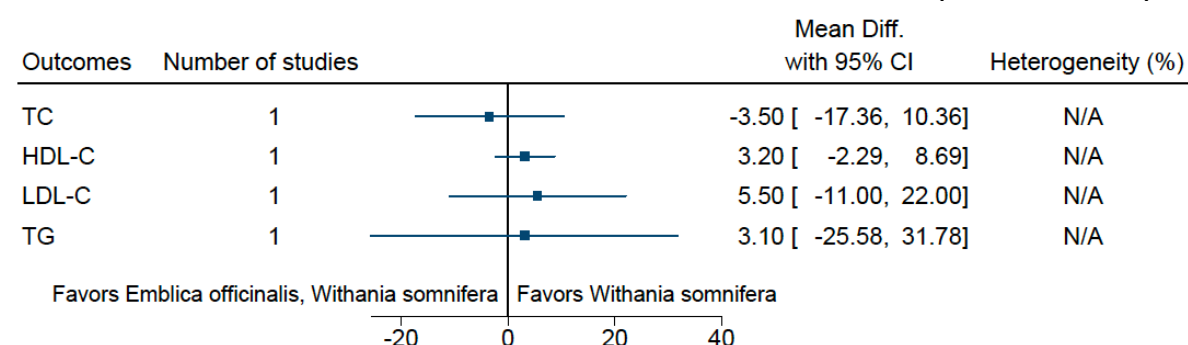

### ***Enicostemma axillare* versus Shilajit (Kumar 2014)**

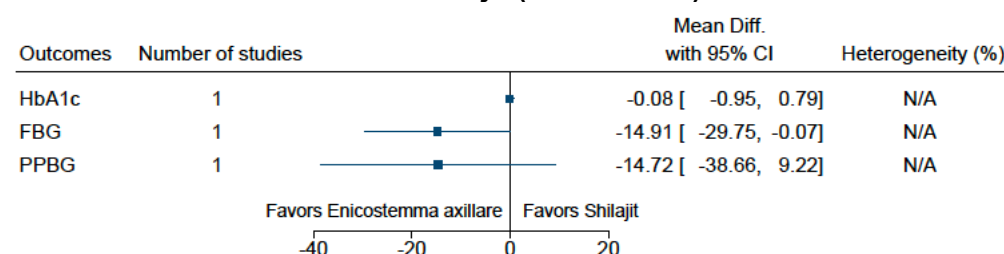

### ***Enicostemma axillare*+*Emblica officinalis*+*Tinospora cordifolia* (Sharma 2019)**

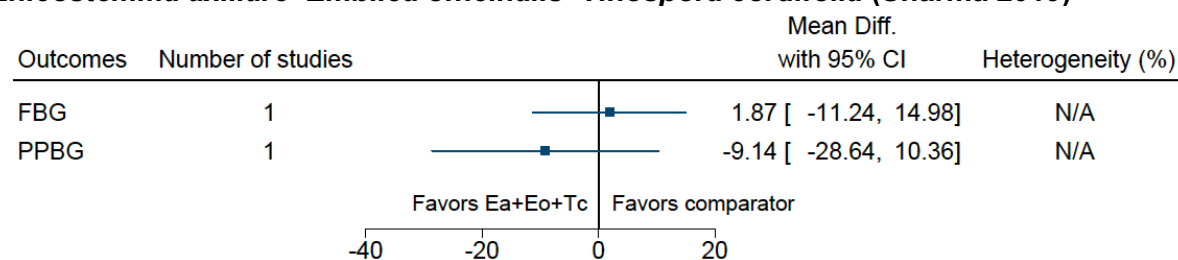

### **Herbal combination (Shokoohi 2017)**

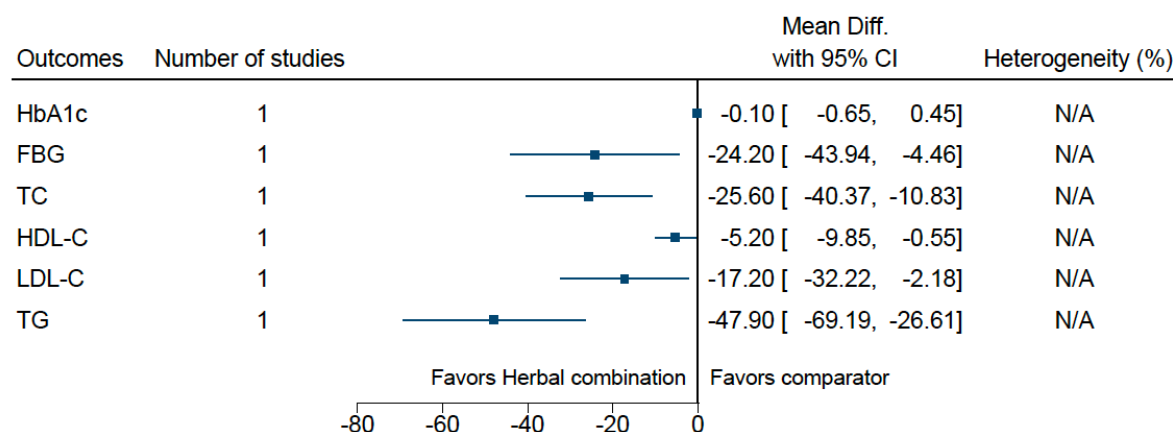

### ***Hibiscus sabdariffa* (Sarhini 2019)**

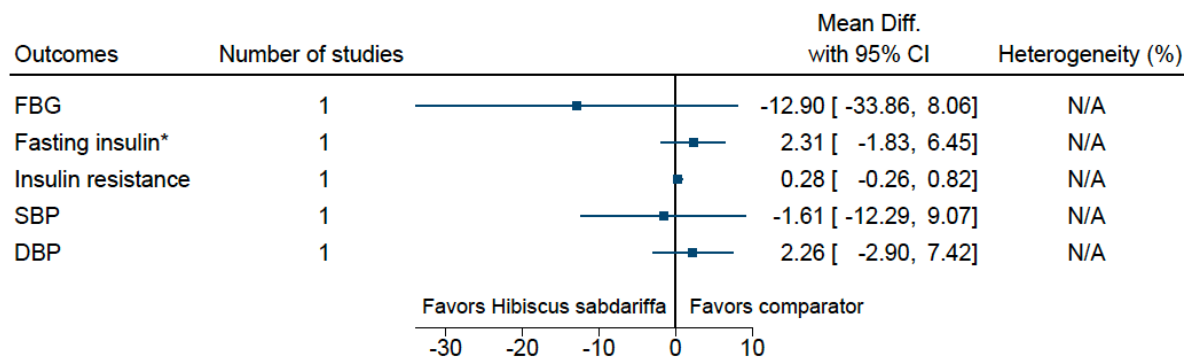

\*Favors Intervention/comparator as insulin sensitizer

## Hyponidd (Poongothai 2002)

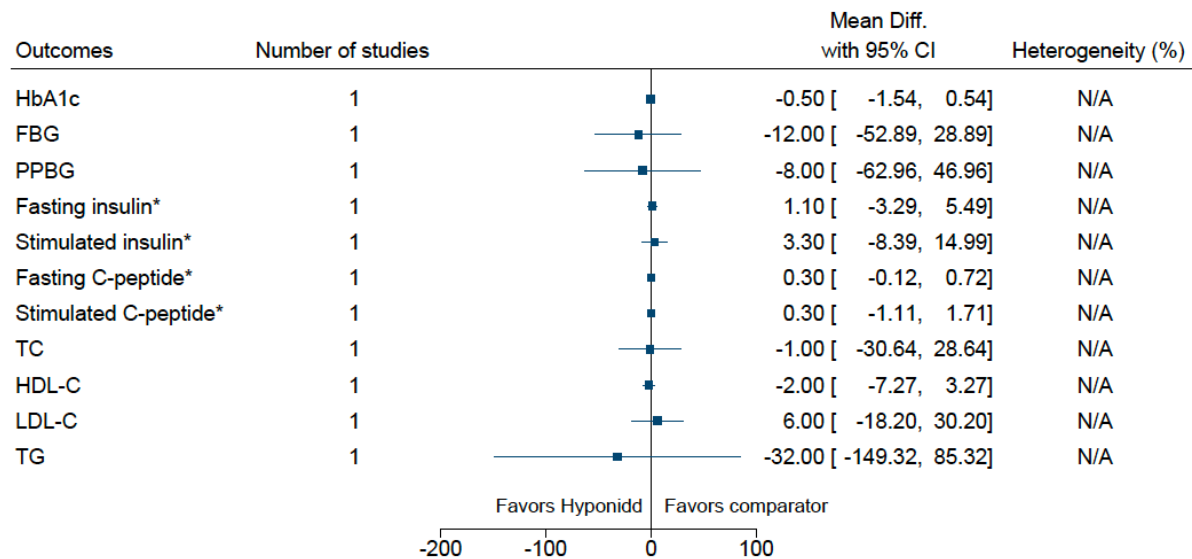

\*Favors intervention/comparator as insulin sensitizer

## Inolter (Agrawal 2002)

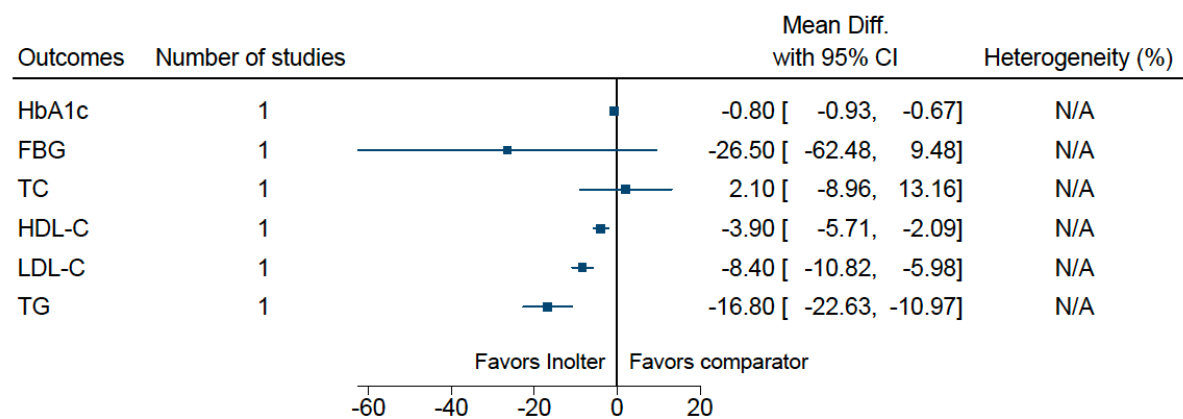

## Kalpit (Agarwal 2013)

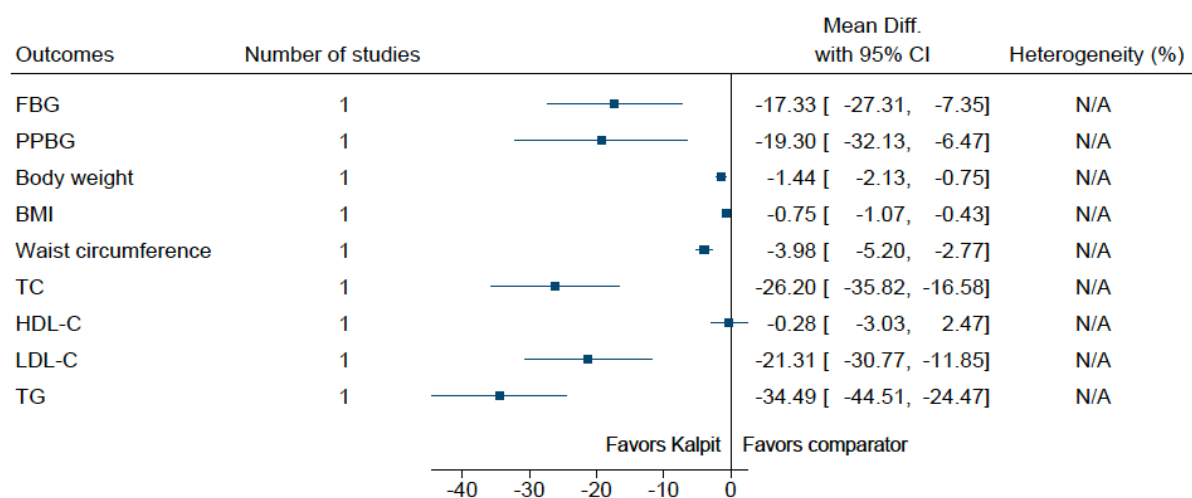

## Kalpita (versus OAD) (Agarwal 2013)

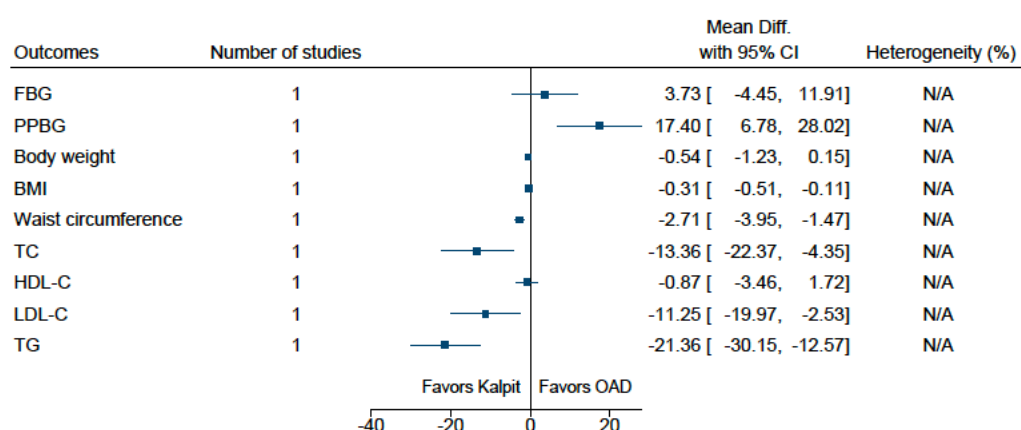

## Khadira-Kramuka Kashaya Ghanavati (Paliwal 2018)

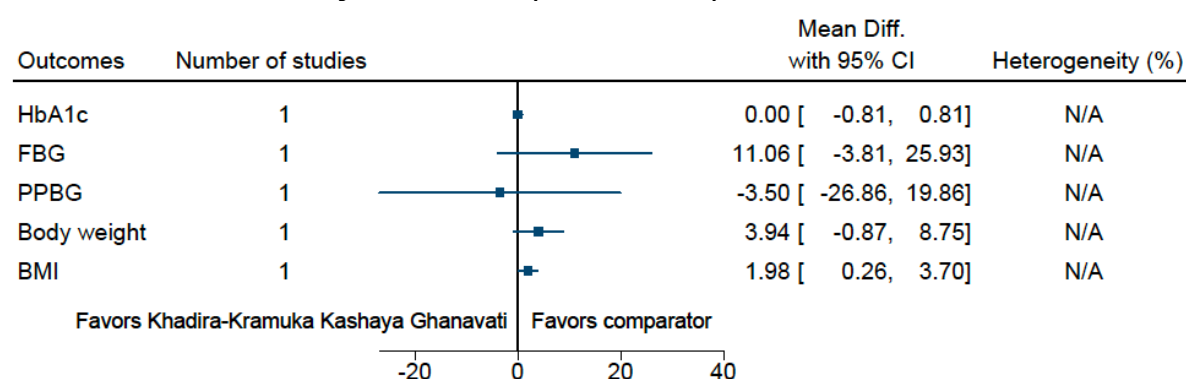

## Khadira-Kramuka Kashaya Ghanavati versus Nishamalaki, Shilajit (Paliwal 2018)

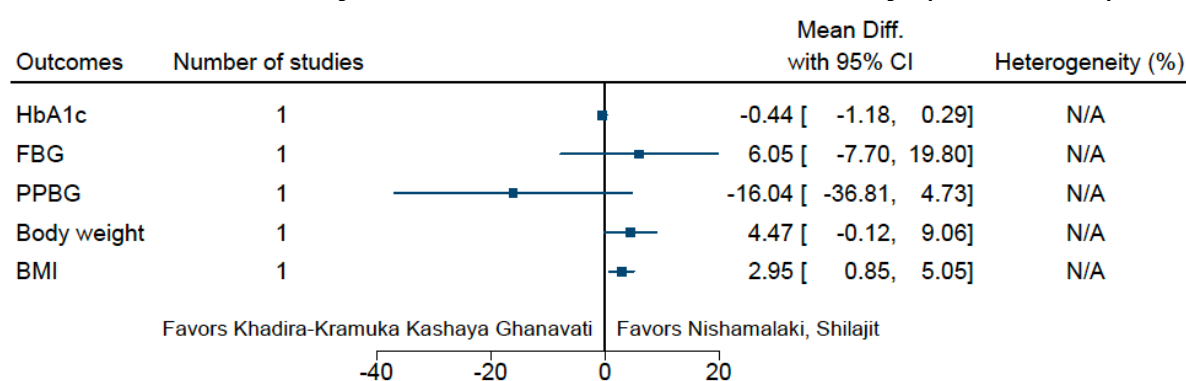

### Kiratadi Churna (Kumari 2016)

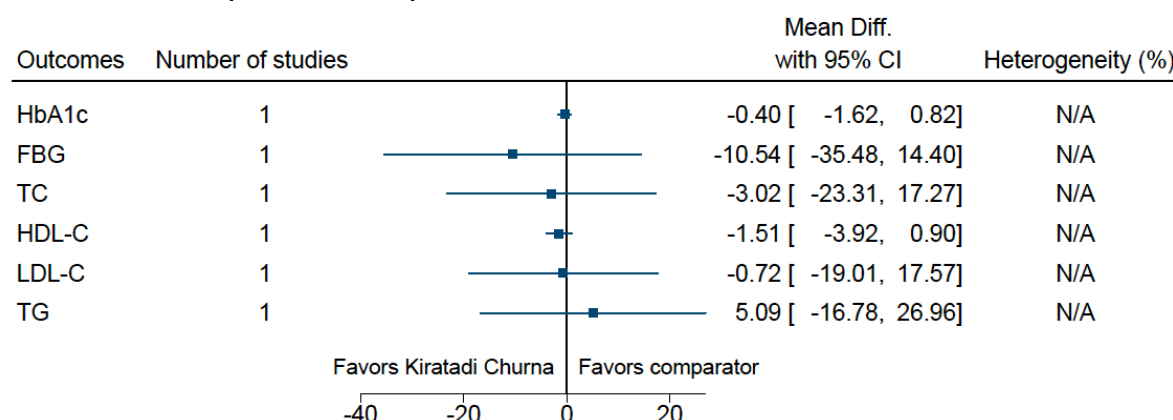

### Linum usitatissimum (Barre 2008, Hashemzadeh 2017)

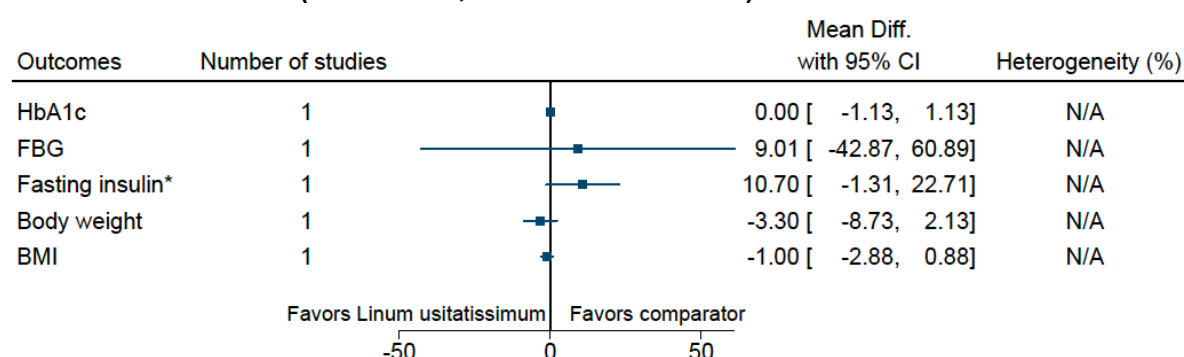

\*Favors intervention/comparator as insulin sensitizer

### Linum usitatissimum versus Plantago ovata (Ricklefs-Johnson 2017)

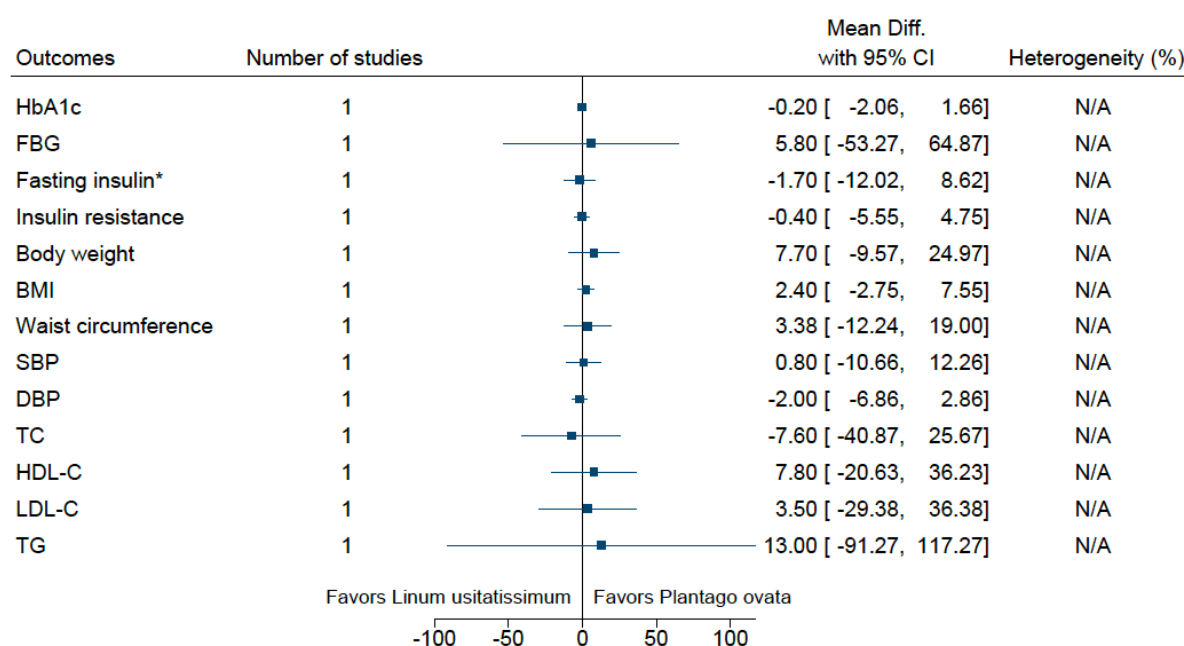

\*Favors intervention/comparator as insulin sensitizer

### Lodhradi Kashaya Ghana Vati (Bramhankar 2017)

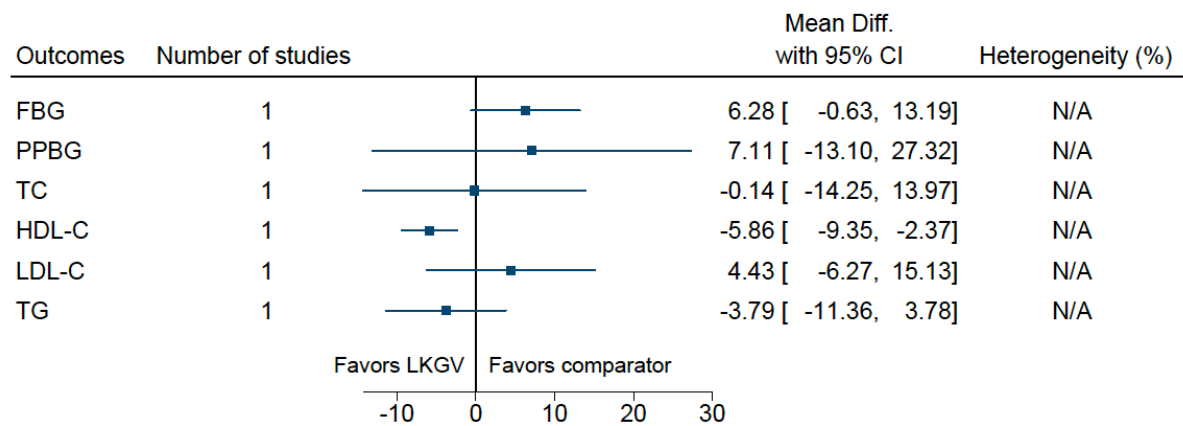

### Lodhradi Kashaya Ghana Vati (versus OAD) (Bramhankar 2017)

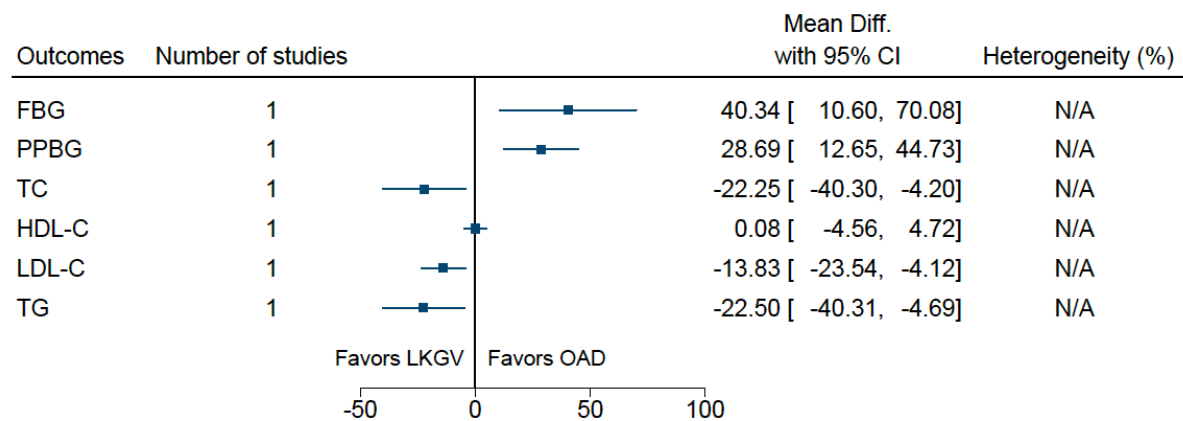

### Madhumeha Nashini Gutika (Bhawana 2015)

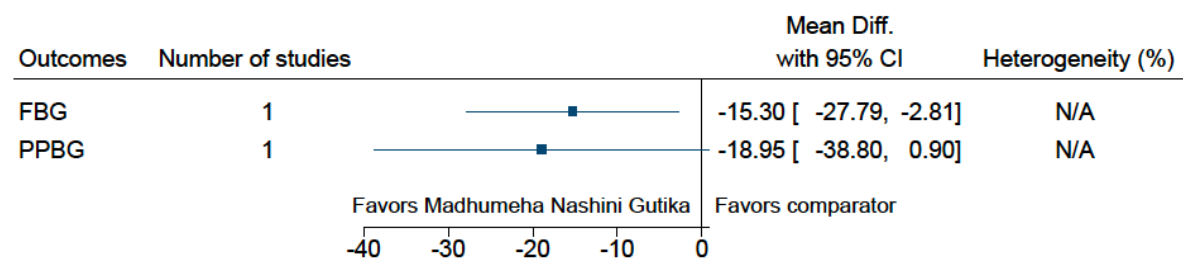

### Madhumeha Nashini Gutika versus Darvyadi Kwatha (Bhawana 2015)

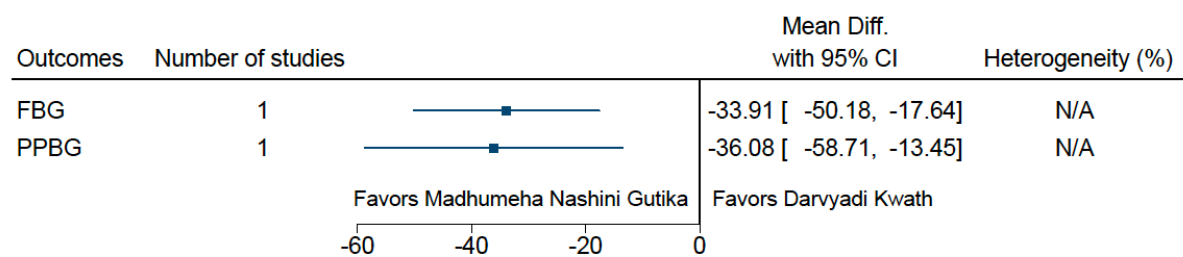

### Mamajjaka Ghana Vati versus Tejashiladi Vati (Bhagat 2017)

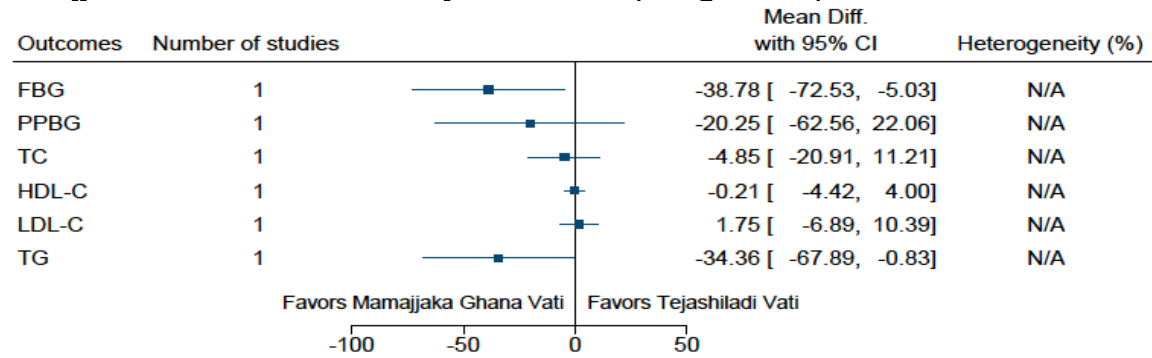

### Mamajjaka Ghana Vati versus Trikatu Gutika (Kataria 2017)

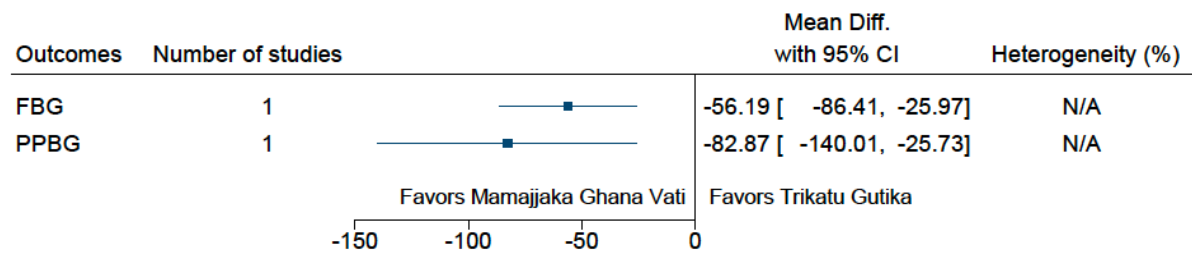

### Mangifera indica (Balasubramaniam 2010)

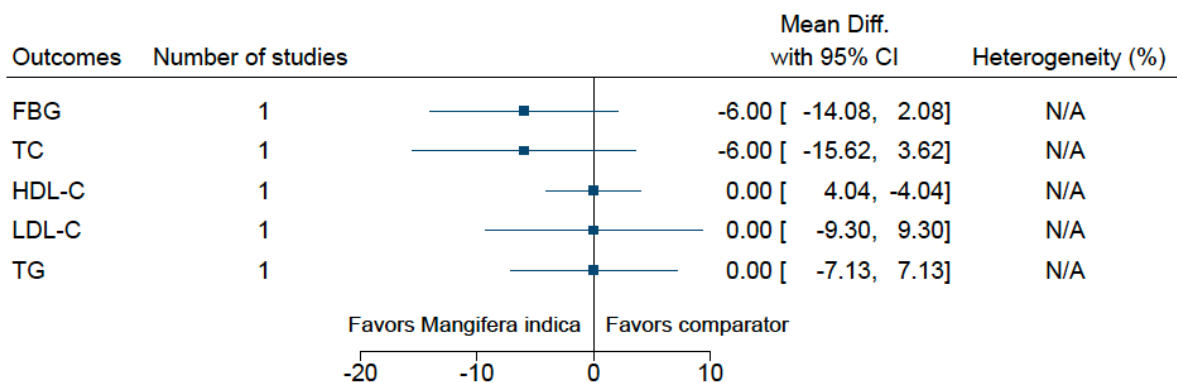

### Mehagni (Gopalakrishna 2017)

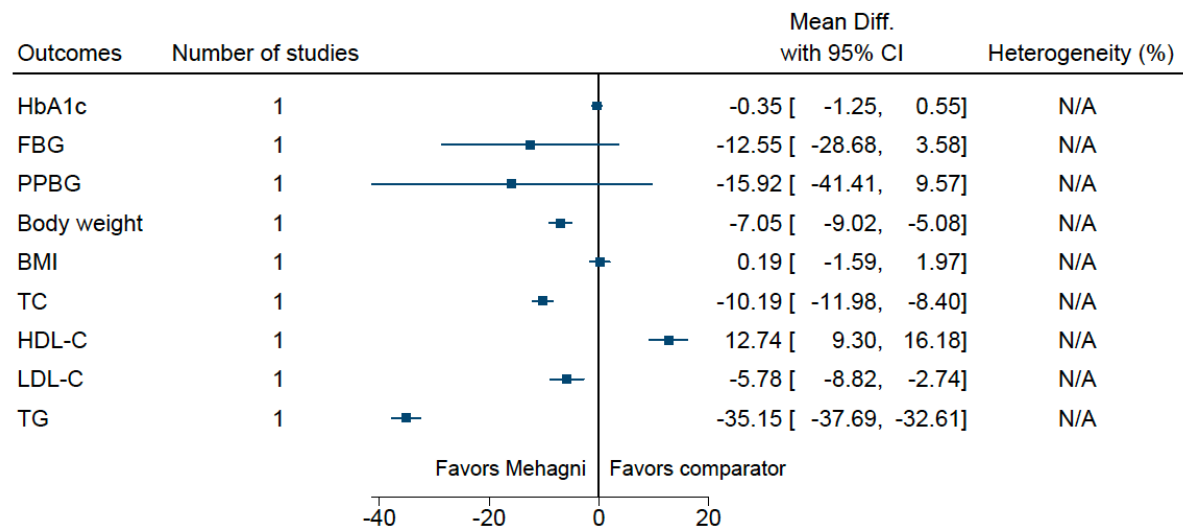

### Murraya koenigii (Balasubramaniam 2010)

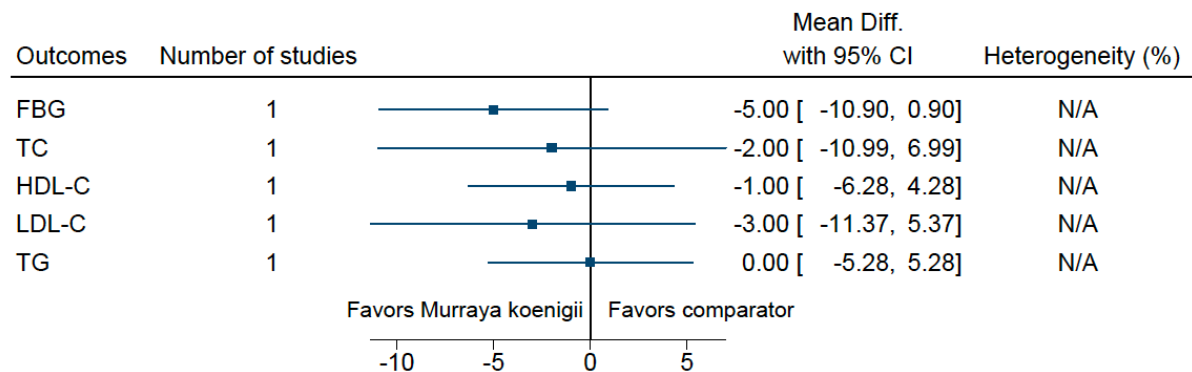

### Musa sapientum (Balasubramaniam 2010)

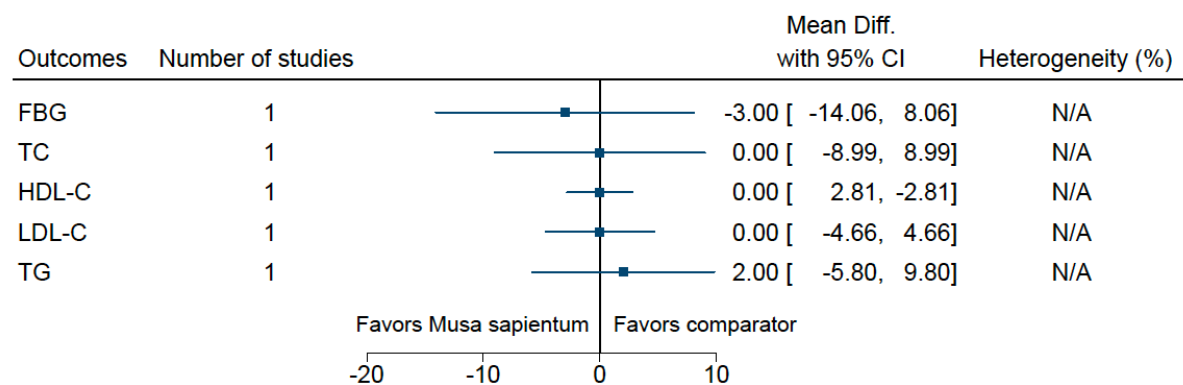



### Mustadi Kwatha Ghana Vati (Kushwaha 2017)

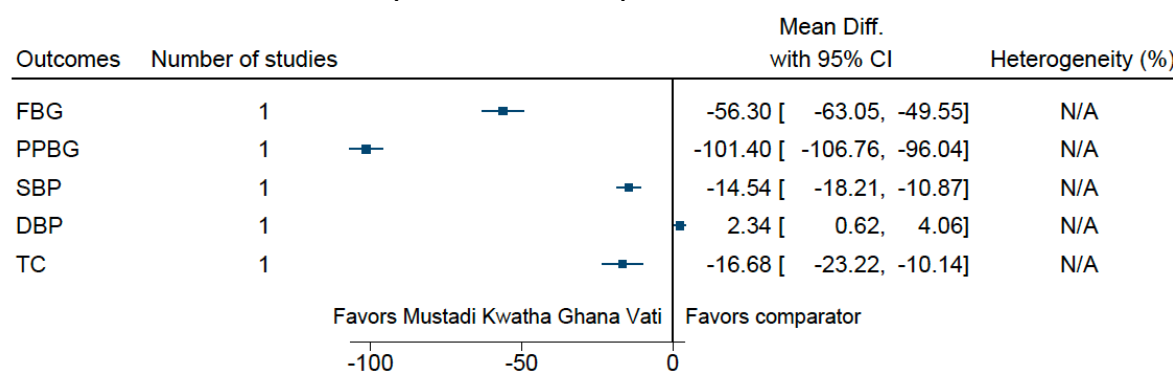

### Naga Bhasma, Nishamalaki versus Nishamalaki, *Hordeum vulgare* (Desale 2018)

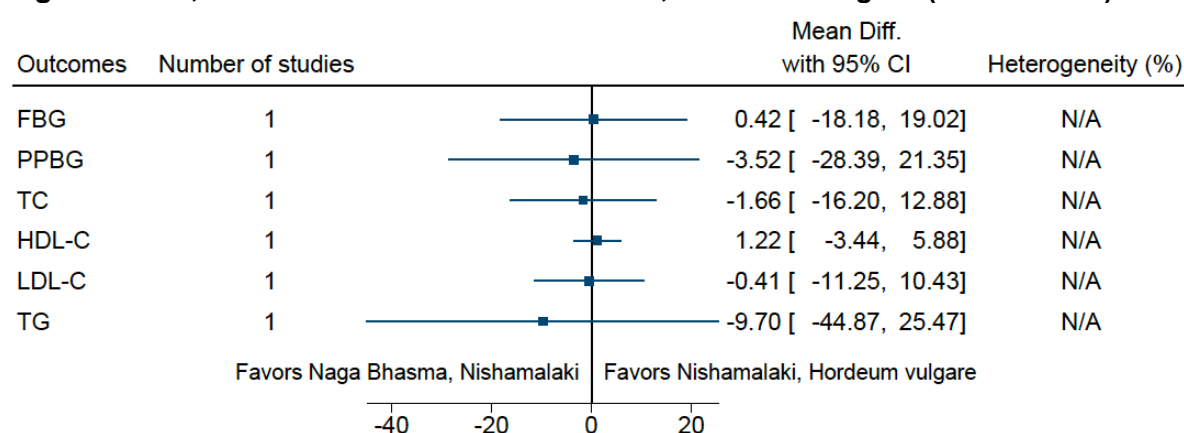

### Nigella sativa (versus OAD) (Moustafa 2019)

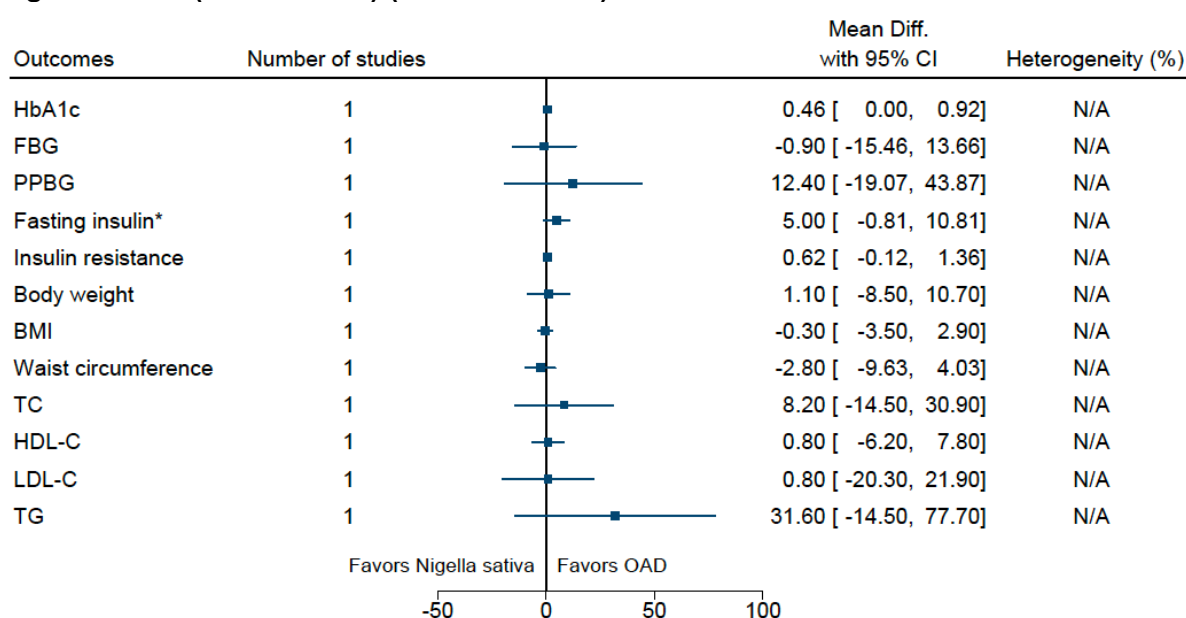

\*Favors intervention/comparator as insulin sensitizer

***Nigella sativa*, *Trigonella foenum-graecum* (Memon 2010a, Memon 2010b, Memon 2012)**

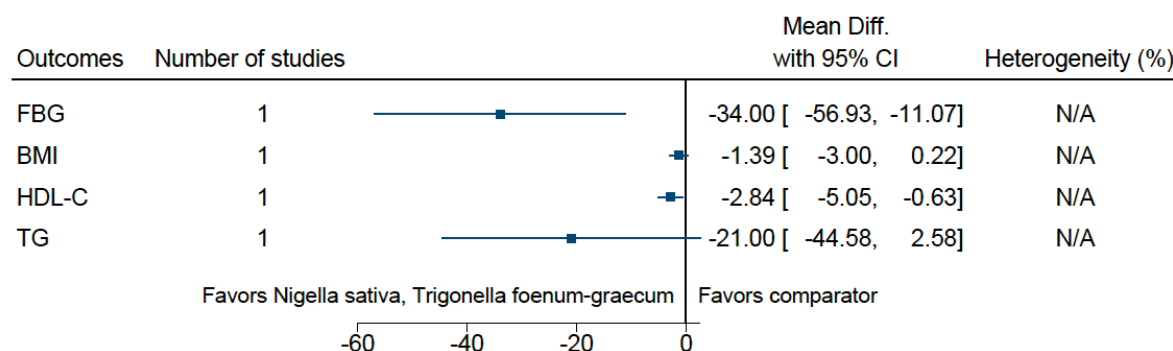

**Nisha Katakadi Kashaya (Srinivas 2018)**

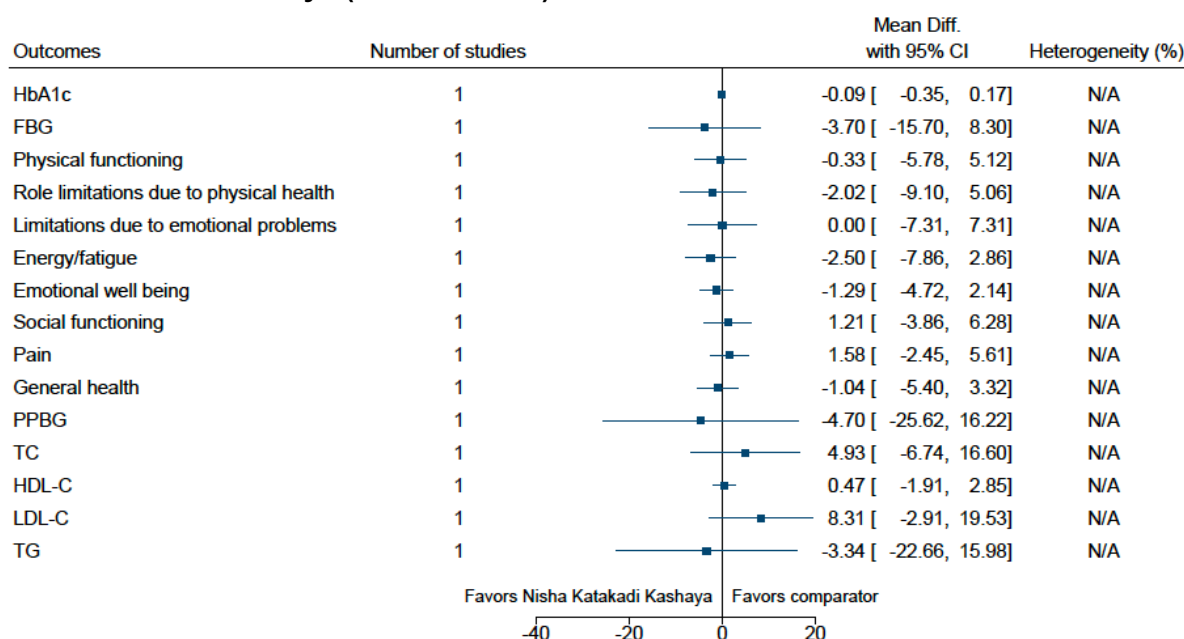

## Nisha Katakadi Kashaya versus Yashad Bhasma (Srinivas 2018)

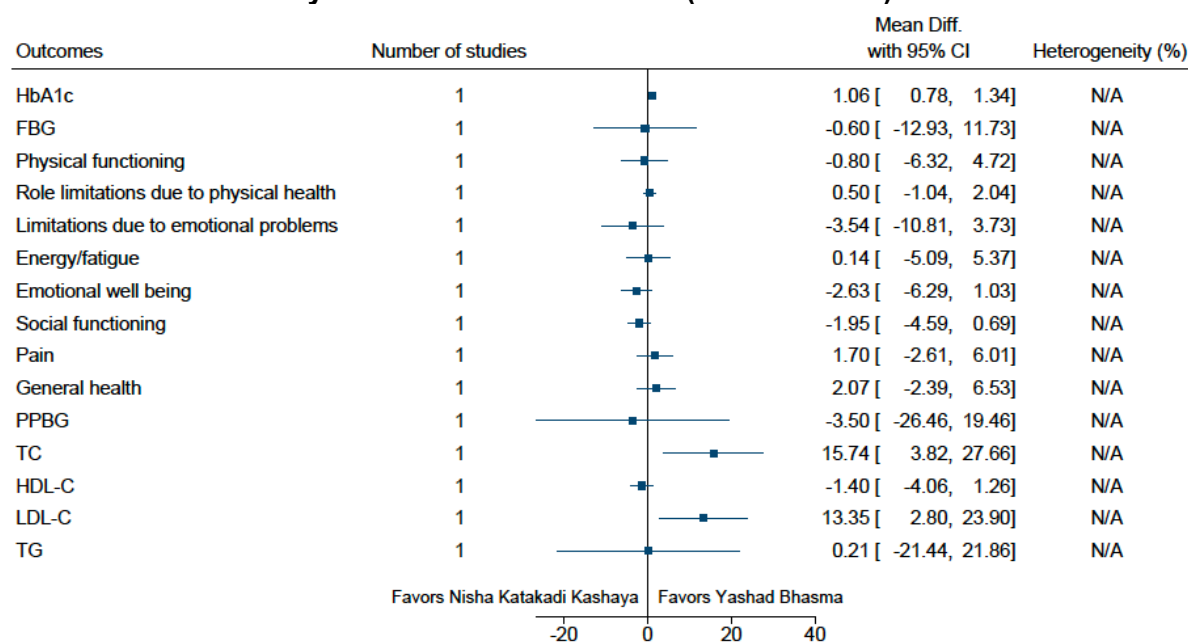

## Nishamalaki (Samagandi 2012)

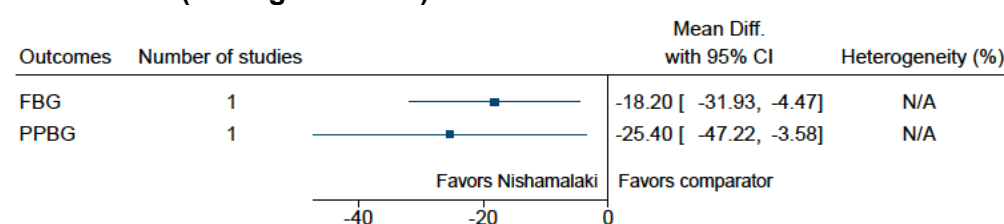

## Nishamalaki, Shilajit (Paliwal 2018)

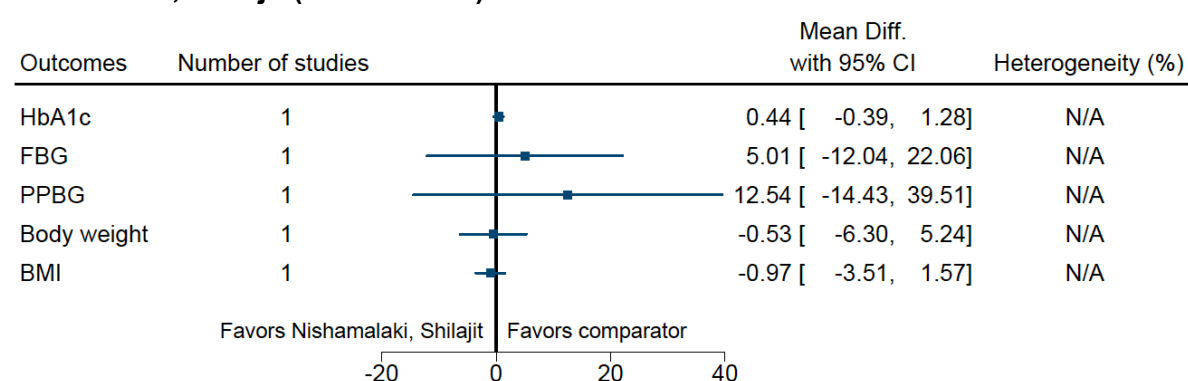

### ***Ocimum tenuiflorum* (Balasubramaniam 2010)**

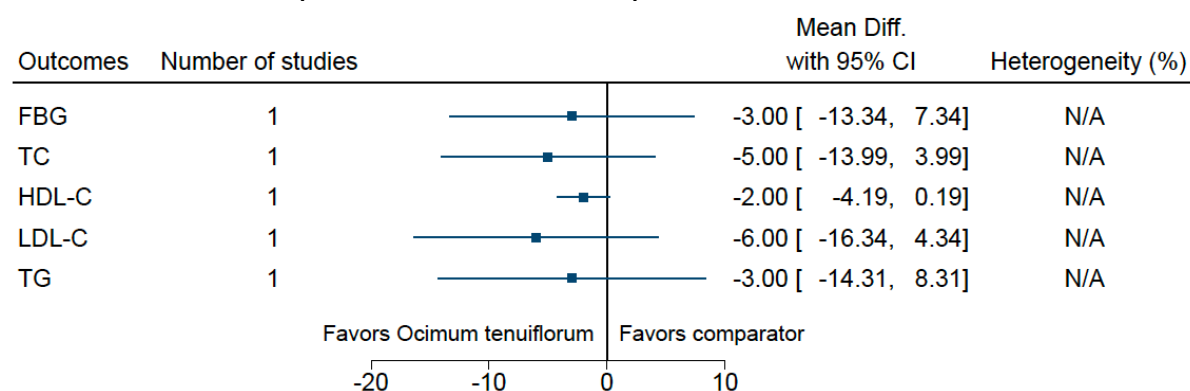

### **Pancreas tonic (Hsia 2004)**

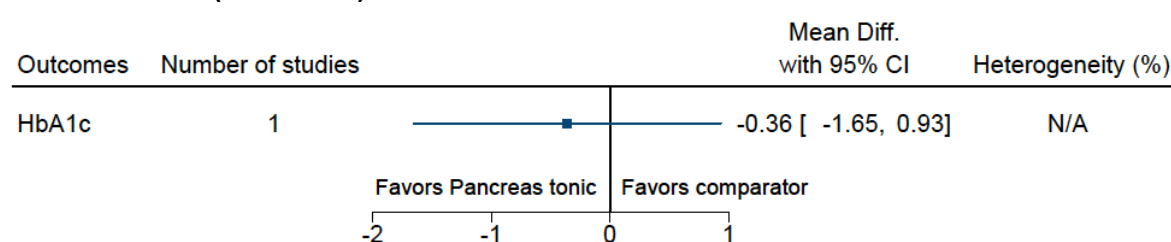

### ***Phyllanthus amarus* (Balasubramaniam 2010)**

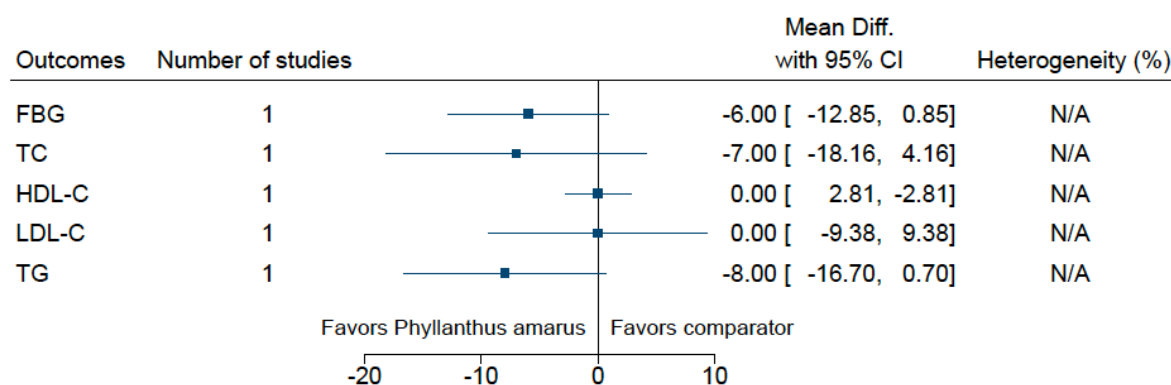

# Polyherbal formulation (Awasthi 2015)

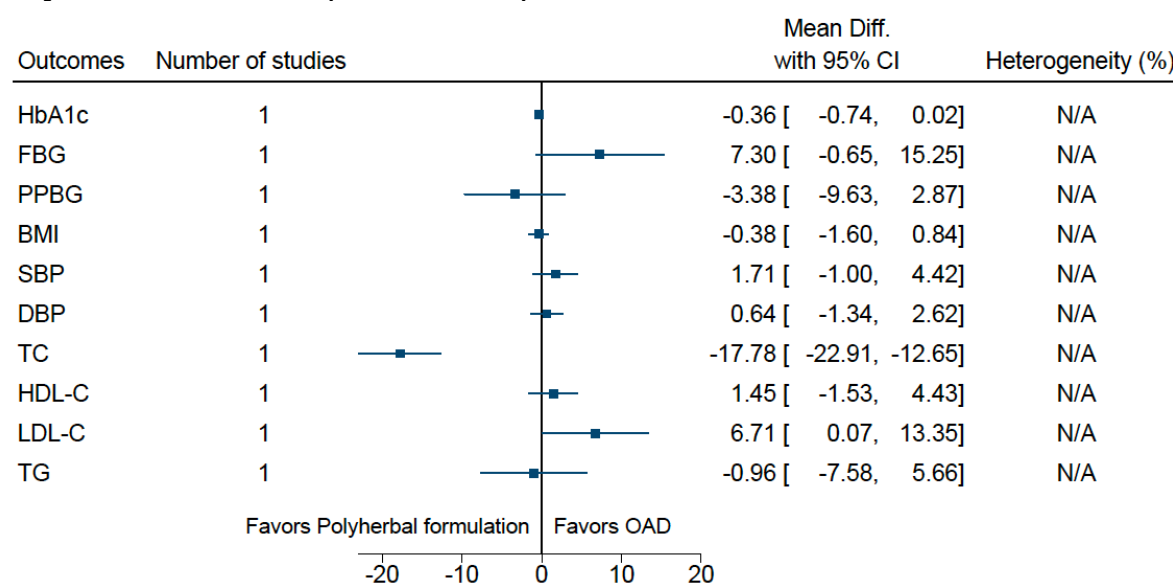

# Portulaca oleracea (versus OAD) (El-Sayed 2011)

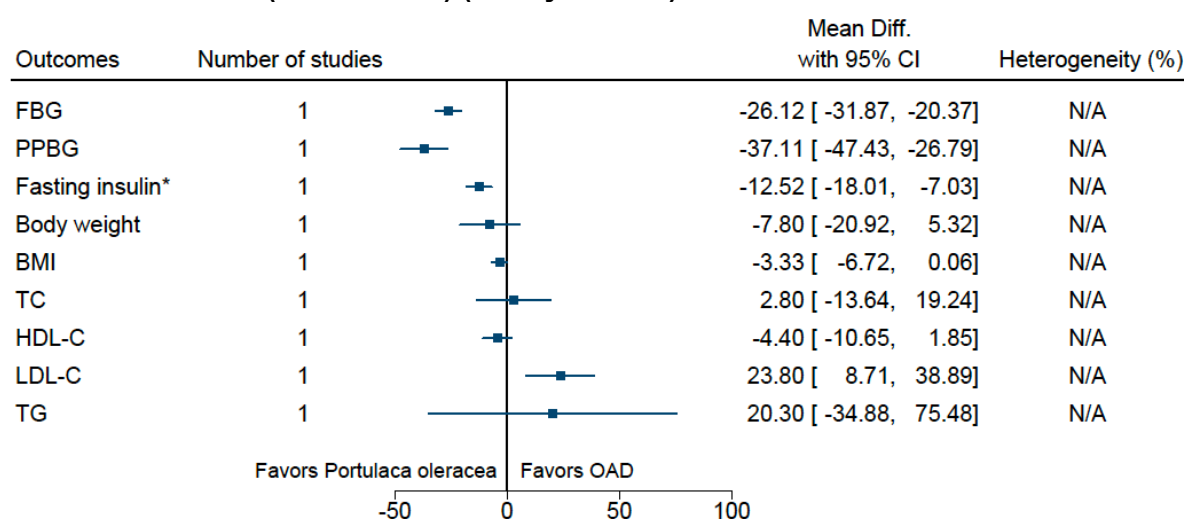

\*Favors intervention/comparator as insulin sensitizer

# Salasaradi Kashaya+Shilajit+Trivanga Bhasma+Tinospora cordifolia, Azadirachta indica versus Hyponidd (Bhat 2012)

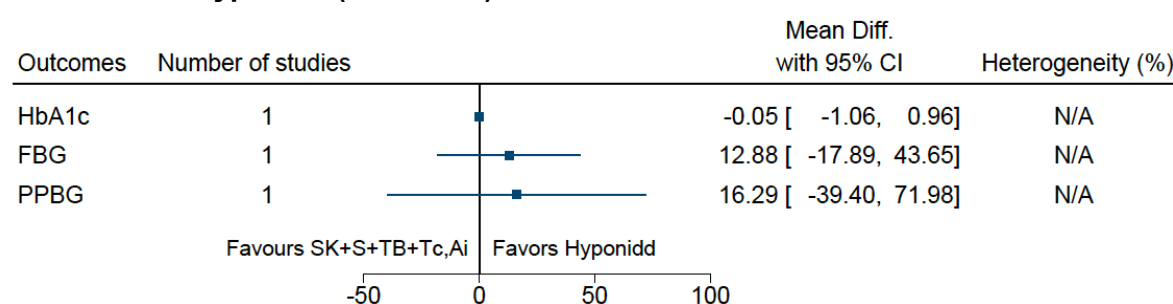

### Shilajit (versus OAD) (Kumar 2014)

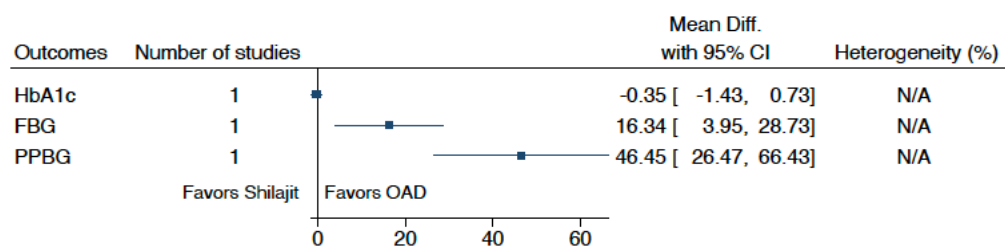

### Swarnamakshika Bhasma (Taviad 2016)

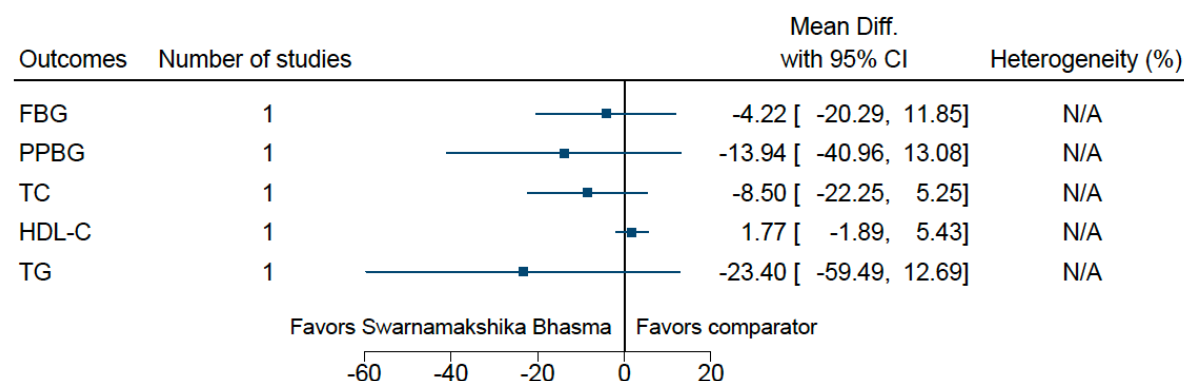

### Syzygium cumini (versus OAD) (Sahana 2010)

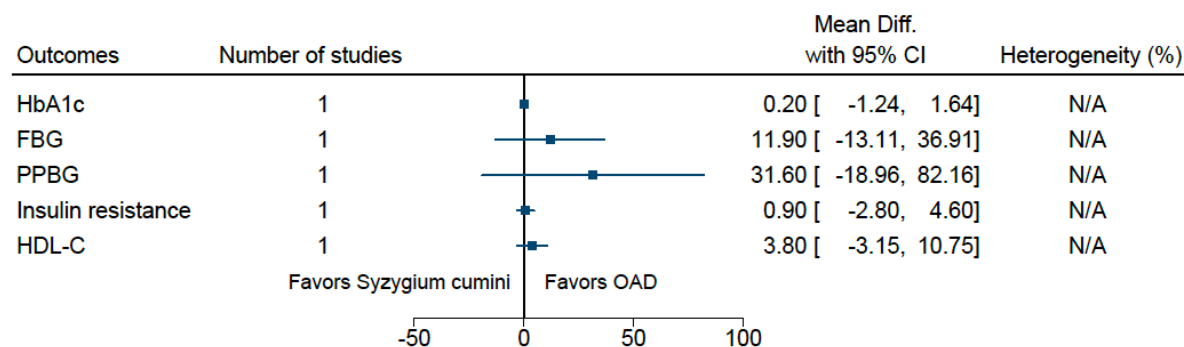

### Syzygium cumini+Withania coagulans (Siddiqui 2017)

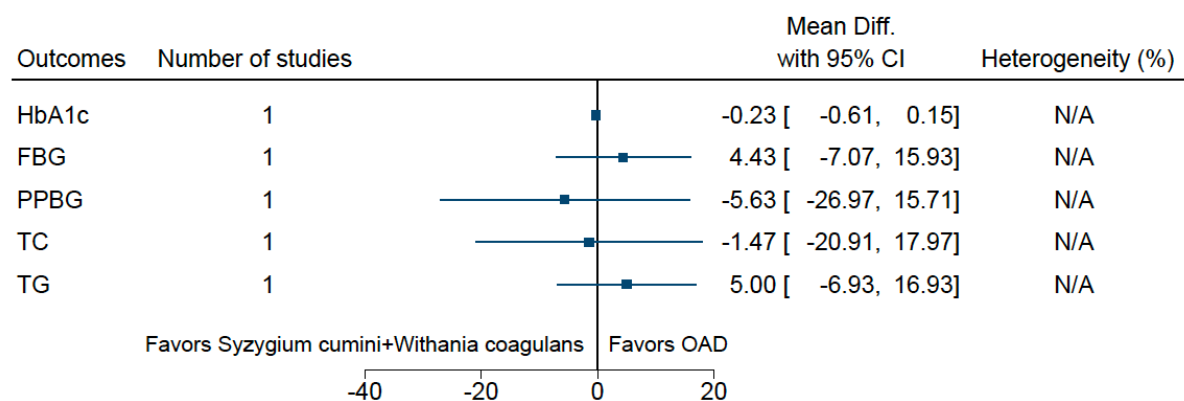

### Talapotaka Churna (Nille 2018)

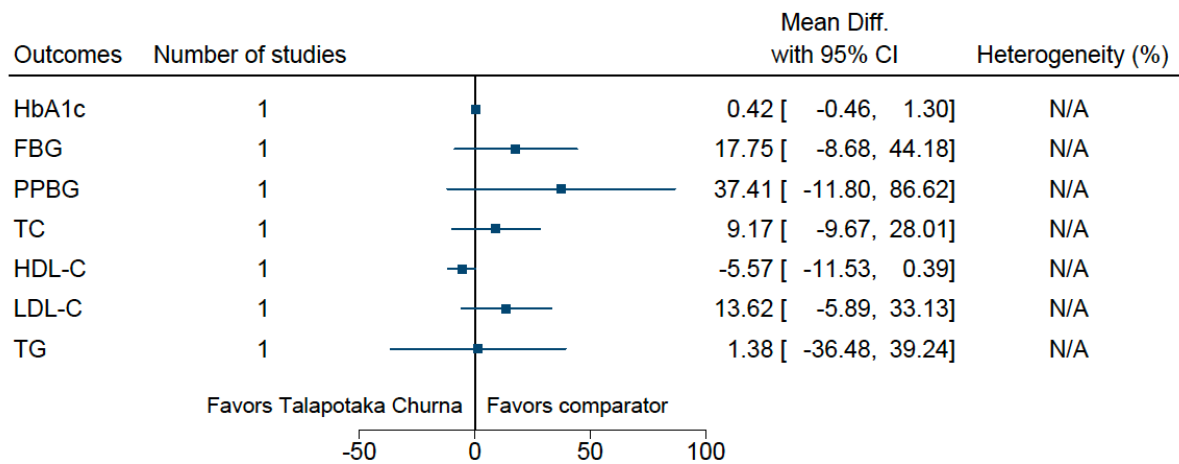

### Talapotaka Churna (versus OAD) (Nille 2018)

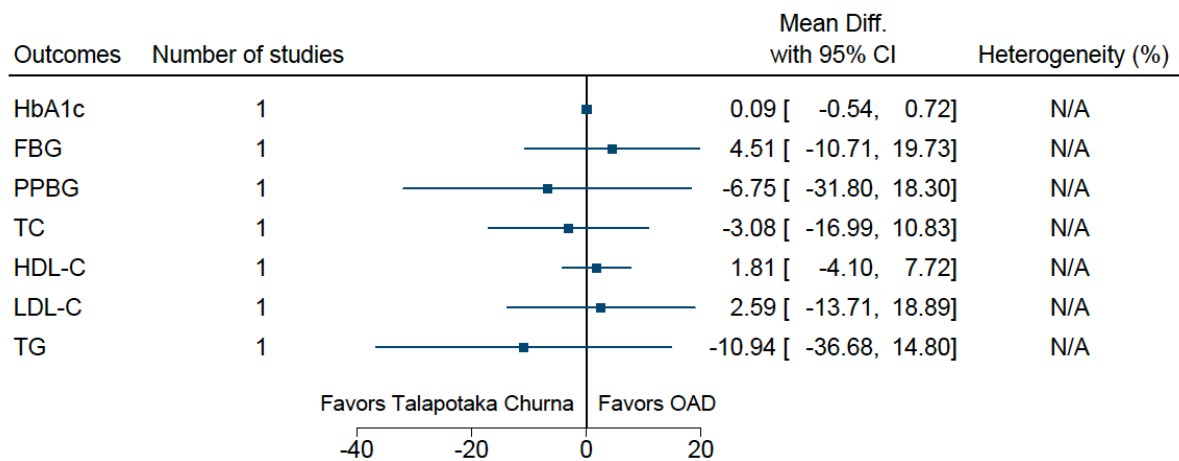

### *Terminalia chebula* (Usharani 2020)

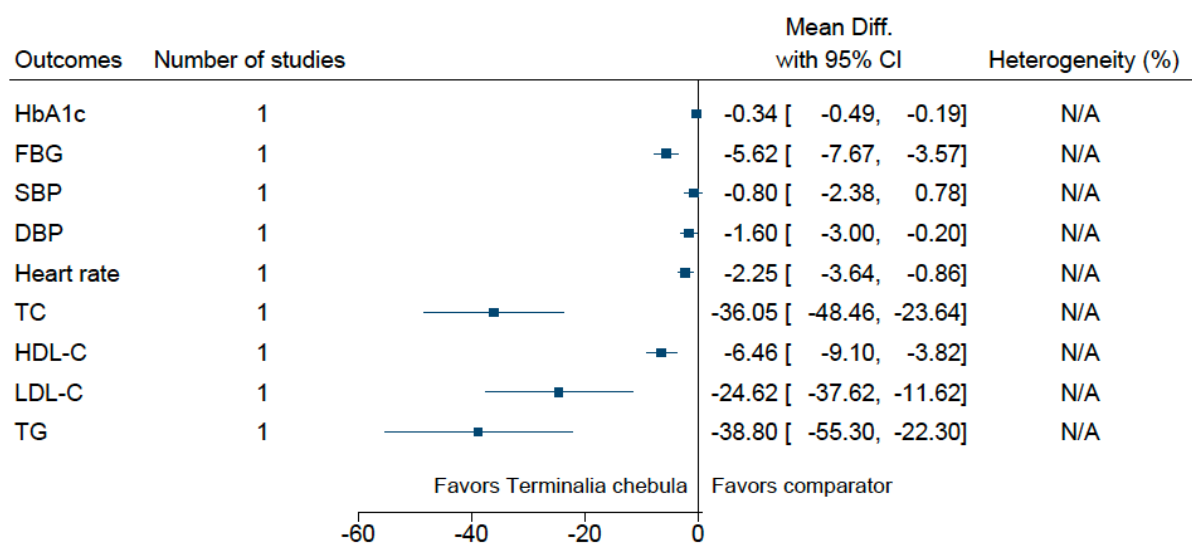

### ***Tribulus terrestris* (Samani 2016)**

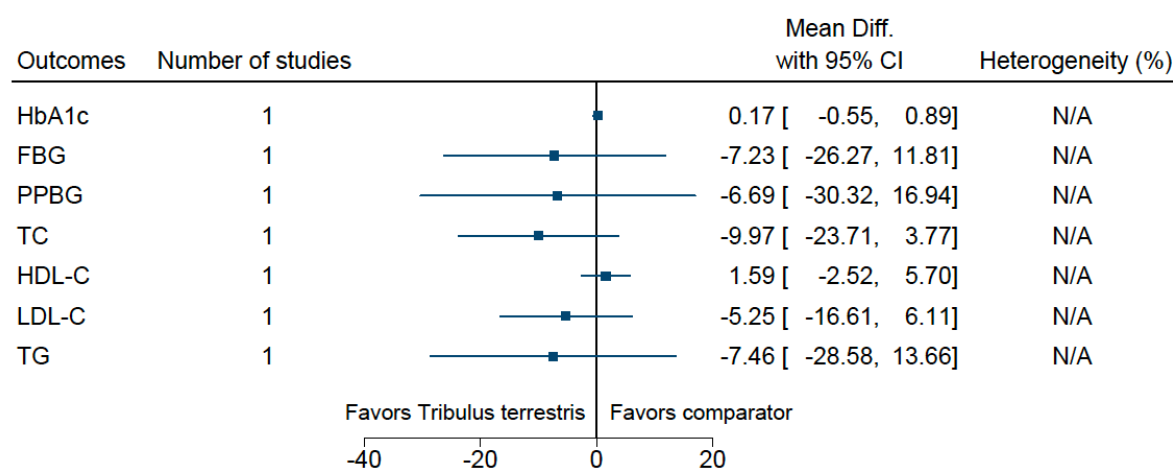

### ***Trigonella foenum-graecum, Ocimum tenuiflorum* (Mitra 2006)**

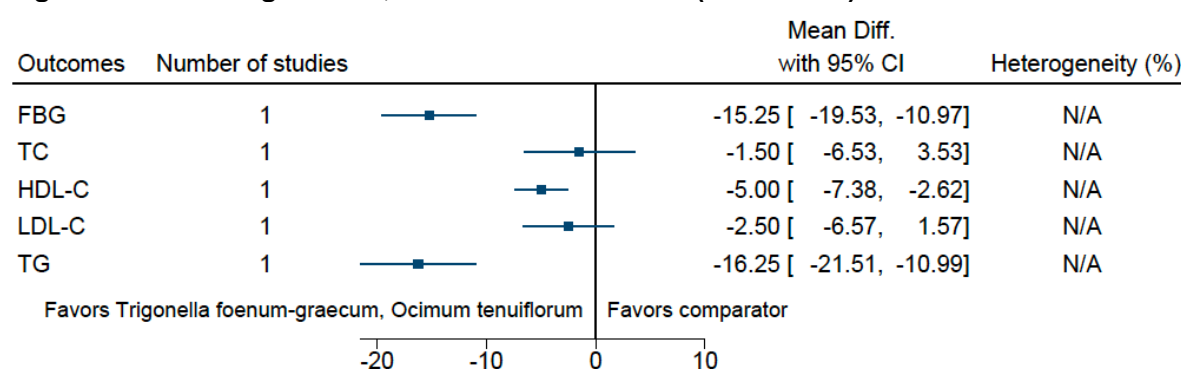

### ***Trigonella foenum-graecum* versus *Aegle marmelos* (Yaheya 2009)**

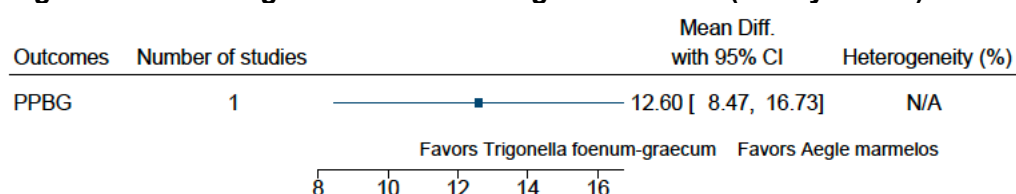

### ***Trigonella foenum-graecum*+*Aegle marmelos* (Yaheya 2009)**

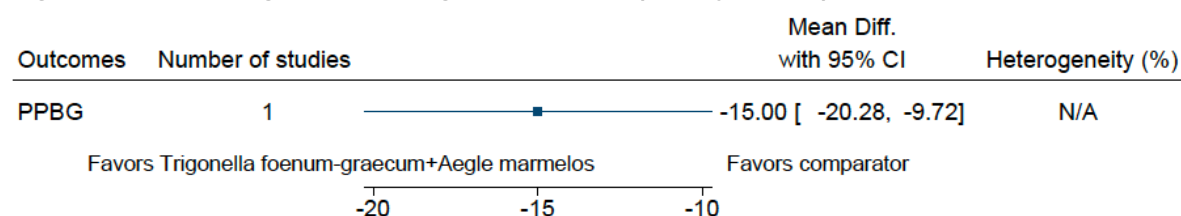



### ***Triticum aestivum* (Samagandi 2012)**

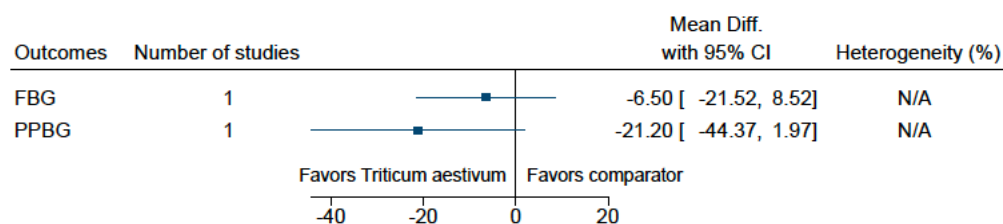

### ***Triticum aestivum* versus Nishamalaki (Samagandi 2012)**

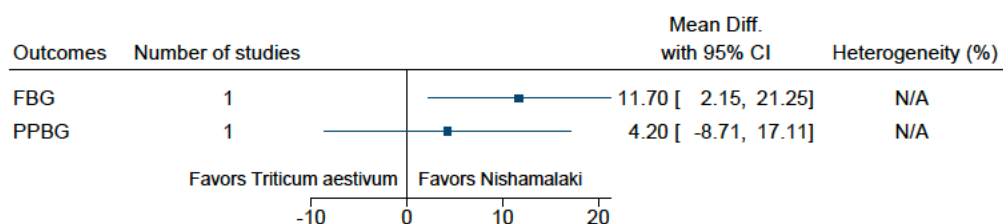

### ***Vernonia cinerea* (Sayeed 2013)**

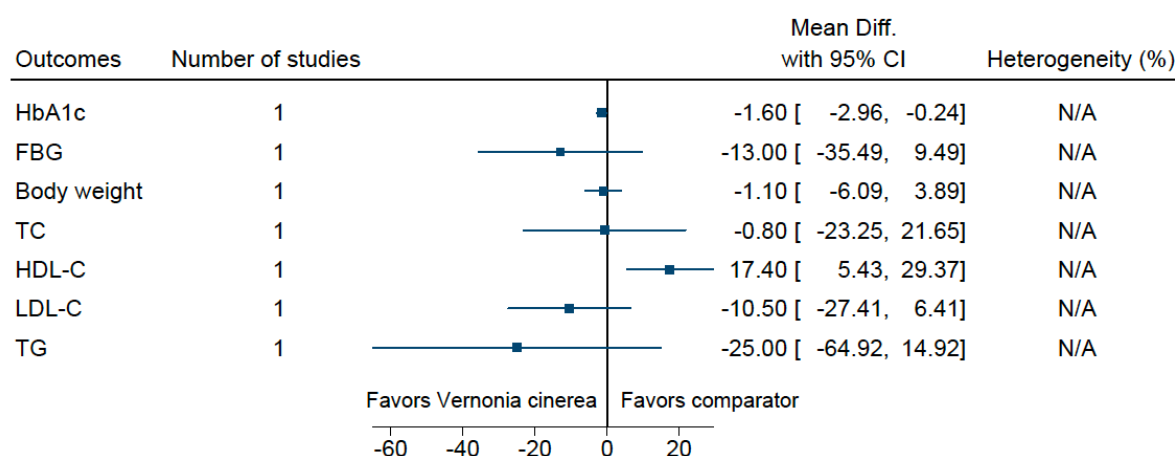

### **Vidangadi Yoga (versus OAD) (Deshpande 2018)**

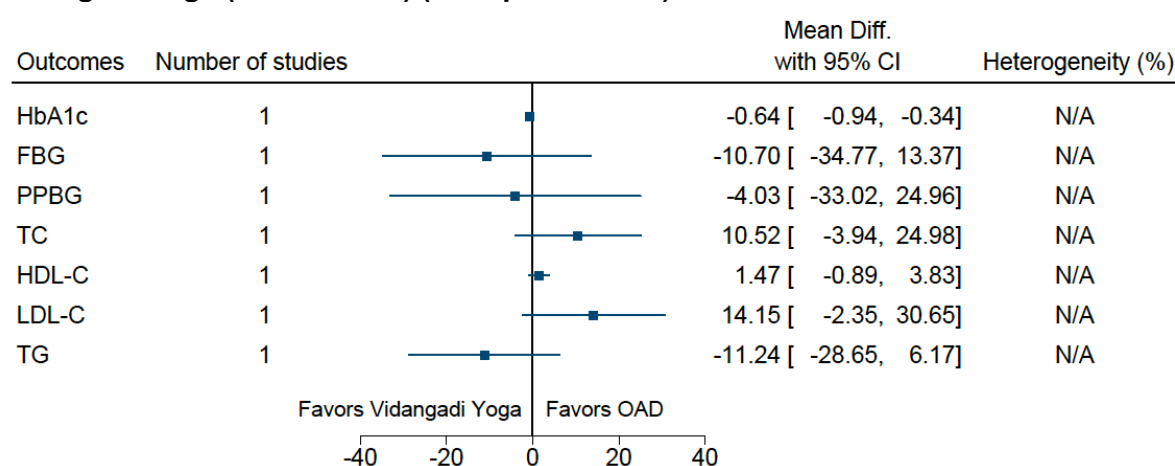

### Vijaysaradi Ghana Vati versus Madhumehari Vati (Sharma 2018)

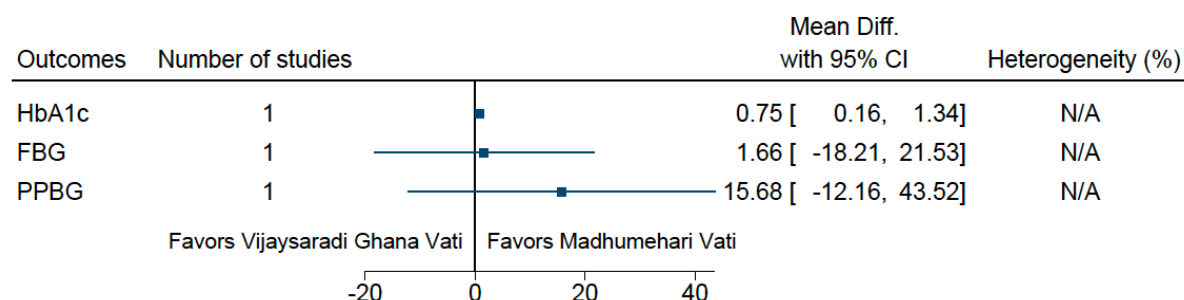

### Withania coagulans (Hemalatha 2018)

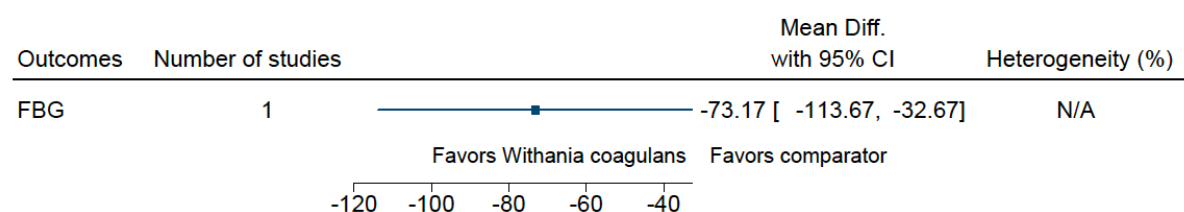

### Withania somnifera (Usharani 2014)

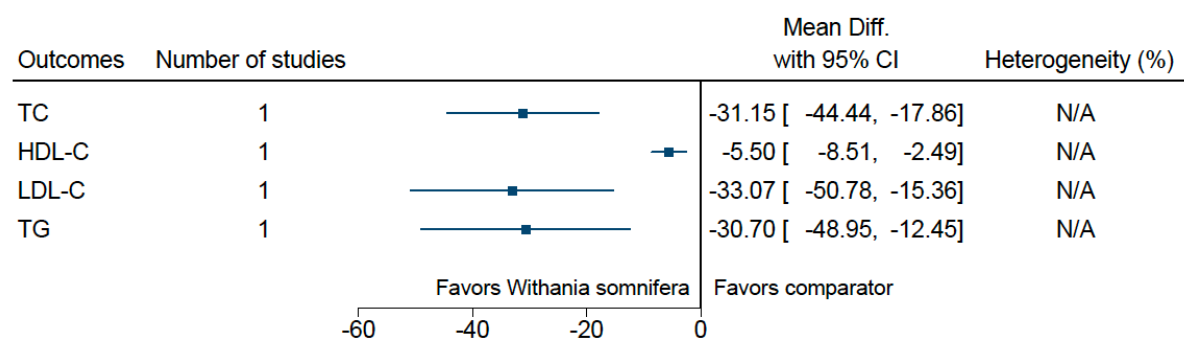

### Yashad Bhasma (Srinivas 2018)

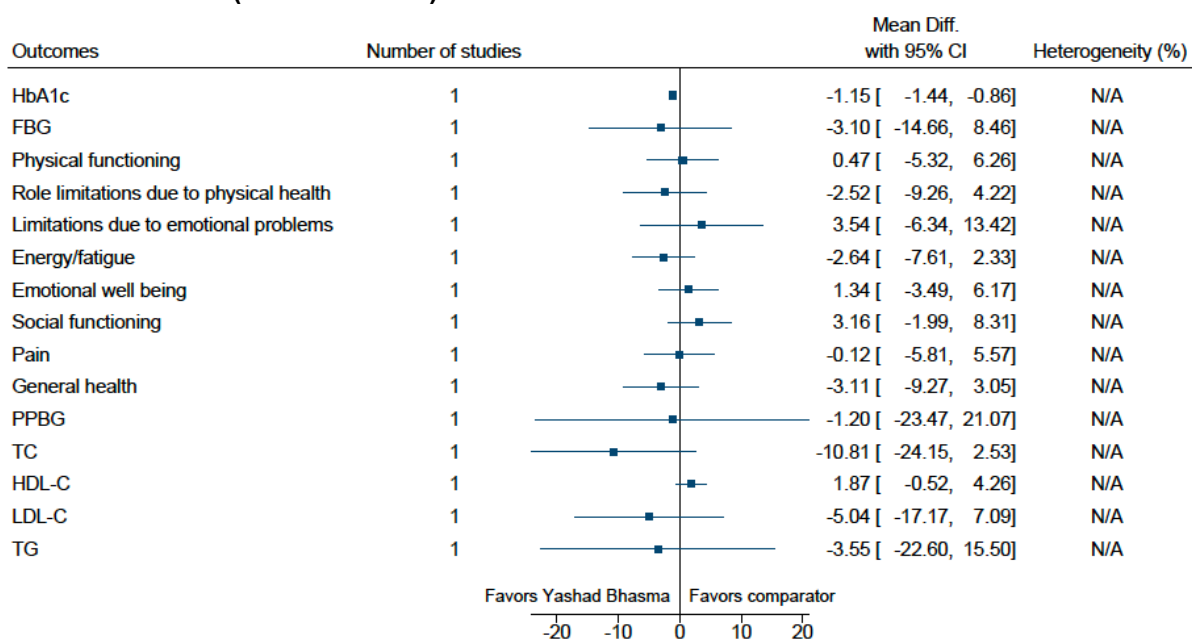

***Ziziphus mauritiana* (Yazdanpanah 2017)**

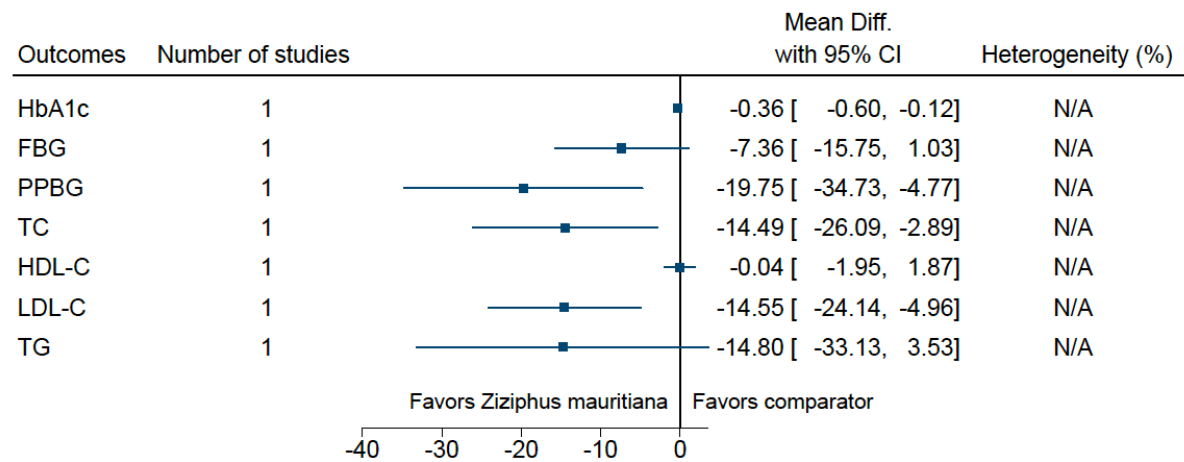

## Appendix S8: Adverse events and dropouts/withdrawals/discontinued interventions due to adverse events in the included studies.

| Author and year                                                       | Study arms                        | Adverse events (including serious adverse events)                                | Dropouts/withdrawals/discontinued interventions due to adverse events (if mentioned) |
|-----------------------------------------------------------------------|-----------------------------------|----------------------------------------------------------------------------------|--------------------------------------------------------------------------------------|
| <b>Ayurvedic medicine- single plant- or mineral-origin ingredient</b> |                                   |                                                                                  |                                                                                      |
| <b><i>Abelmoschus esculentus</i></b>                                  |                                   |                                                                                  |                                                                                      |
| Moradi 2020                                                           | A1= <i>Abelmoschus esculentus</i> | 0                                                                                |                                                                                      |
|                                                                       | A2=Placebo                        |                                                                                  |                                                                                      |
| <b><i>Acacia Senegal</i></b>                                          |                                   |                                                                                  |                                                                                      |
| Babiker 2017,<br>Babiker 2018                                         | A1= <i>Acacia senegal</i>         | Abdominal boating-6, Diarrhea-11, Discomfort with viscous sensation-32, Nausea-8 |                                                                                      |
|                                                                       | A2=Placebo                        |                                                                                  |                                                                                      |
| <b><i>Aegle marmelos</i></b>                                          |                                   |                                                                                  |                                                                                      |
| Sankhla 2009                                                          | A1= <i>Aegle marmelos</i>         |                                                                                  |                                                                                      |
|                                                                       | A2=Placebo                        |                                                                                  |                                                                                      |
| Sharma 2013                                                           | A1= <i>Aegle marmelos</i>         | 0                                                                                |                                                                                      |
|                                                                       | A2=Placebo                        | 0                                                                                |                                                                                      |
| Nigam 2019                                                            | A1= <i>Aegle marmelos</i>         | Exact names and numbers not provided                                             |                                                                                      |
|                                                                       | A2=No additional medicine?        |                                                                                  |                                                                                      |
| <b><i>Allium sativum</i></b>                                          |                                   |                                                                                  |                                                                                      |
| Ashraf 2005                                                           | A1= <i>Allium sativum</i>         |                                                                                  | Heart burn-1                                                                         |
|                                                                       | A2=Placebo                        |                                                                                  |                                                                                      |
| Ashraf 2011a                                                          | A1= <i>Allium sativum</i>         | Gastric discomfort-1                                                             | Heart burn-3                                                                         |
|                                                                       | A2=OAD                            |                                                                                  | Vague abdominal discomfort-2, Weight loss-1                                          |
|                                                                       | A3=Placebo                        |                                                                                  |                                                                                      |
| Ashraf 2011b                                                          | A1= <i>Allium sativum</i>         | Gastric discomfort-1                                                             | Heart burn-1                                                                         |
|                                                                       | A2=Placebo                        |                                                                                  |                                                                                      |
| Kumar 2013                                                            | A1= <i>Allium sativum</i>         |                                                                                  |                                                                                      |
|                                                                       | A2=No additional medicine         |                                                                                  |                                                                                      |
| <b><i>Aloe vera</i></b>                                               |                                   |                                                                                  |                                                                                      |
| Arora 2009                                                            | A1= <i>Aloe vera</i>              |                                                                                  | Diarrhea-1, Vomiting-1                                                               |
|                                                                       | A2=No additional medicine         |                                                                                  |                                                                                      |
| Huseini 2012a,<br>Huseini 2012b                                       | A1= <i>Aloe vera</i>              | 0                                                                                |                                                                                      |
|                                                                       | A2=Placebo                        | 0                                                                                |                                                                                      |
| Zarrintan 2015                                                        | A1= <i>Aloe vera</i>              |                                                                                  |                                                                                      |
|                                                                       | A2=Placebo                        |                                                                                  |                                                                                      |
| <b><i>Anethum graveolens</i></b>                                      |                                   |                                                                                  |                                                                                      |
| Mobasserri 2014                                                       | A1= <i>Anethum graveolens</i>     |                                                                                  |                                                                                      |
|                                                                       | A2=Placebo                        |                                                                                  |                                                                                      |
| Haidari 2020                                                          | A1= <i>Anethum graveolens</i>     |                                                                                  |                                                                                      |
|                                                                       | A2=Placebo                        |                                                                                  |                                                                                      |
| <b><i>Azadirachta indica</i></b>                                      |                                   |                                                                                  |                                                                                      |
| Usharani 2020                                                         | A1= <i>Azadirachta indica</i>     | Mild gastrointestinal disturbances-2                                             |                                                                                      |
|                                                                       | A2=Placebo                        |                                                                                  |                                                                                      |

| Author and year                                                | Study arms                | Adverse events (including serious adverse events)                                                                                   | Dropouts/withdrawals/discontinued interventions due to adverse events (if mentioned) |
|----------------------------------------------------------------|---------------------------|-------------------------------------------------------------------------------------------------------------------------------------|--------------------------------------------------------------------------------------|
| Ayurvedic medicine- single plant- or mineral-origin ingredient |                           |                                                                                                                                     |                                                                                      |
| Berberis aristata                                              |                           |                                                                                                                                     |                                                                                      |
| Sharma 2017                                                    | A1=Berberis aristata      | Nausea-2.2%, Flatulence-1.1%, Diarrhea-3.3%, Constipation- 1.1%, Rash-2.2%, Headache-4.4%, Abdominal pain-4.4%, Metallic taste-3.3% |                                                                                      |
|                                                                | A2=No additional medicine |                                                                                                                                     |                                                                                      |
| Boswellia serrata                                              |                           |                                                                                                                                     |                                                                                      |
| Azadmehr 2014                                                  | A1=Boswellia serrata      | 0                                                                                                                                   |                                                                                      |
|                                                                | A2=Placebo                |                                                                                                                                     |                                                                                      |
| Mehrzadi 2018                                                  | A1=Boswellia serrata      | 0                                                                                                                                   |                                                                                      |
|                                                                | A2=Placebo                | 0                                                                                                                                   |                                                                                      |
| Camellia sinensis                                              |                           |                                                                                                                                     |                                                                                      |
| MacKenzie 2007                                                 | A1=Camellia sinensis      | Profuse sweating after ingestion of a single dose of the medicine-1, Systemic rash-1                                                | Profuse sweating after ingestion of a single dose of the medicine-1, Systemic rash-1 |
|                                                                | A2=Placebo                | 0                                                                                                                                   |                                                                                      |
| Mirzaei 2009                                                   | A1=Camellia sinensis      |                                                                                                                                     |                                                                                      |
|                                                                | A2=Placebo                |                                                                                                                                     |                                                                                      |
| Hsu 2011                                                       | A1=Camellia sinensis      | Hypoglycemia-1, Mild constipation-2, Abdominal discomfort-2                                                                         | Hypoglycemia-1                                                                       |
|                                                                | A2=Placebo                | Mild constipation-1, Abdominal discomfort-1                                                                                         |                                                                                      |
| Lasaite 2014                                                   | A1=Camellia sinensis      |                                                                                                                                     |                                                                                      |
|                                                                | A2=Placebo                |                                                                                                                                     |                                                                                      |
| Liu 2014                                                       | A1=Camellia sinensis      | Epigastric dullness-1, Mild constipation-2                                                                                          |                                                                                      |
|                                                                | A2=Placebo                | Abdominal discomfort-1                                                                                                              |                                                                                      |
| Quezada-Fernández 2019                                         | A1=Camellia sinensis      |                                                                                                                                     | Insulin therapy-1                                                                    |
|                                                                | A2=Placebo                |                                                                                                                                     | Insulin therapy-1                                                                    |
| Capparis spinosa                                               |                           |                                                                                                                                     |                                                                                      |
| Huseini 2013                                                   | A1=Capparis spinosa       | 0                                                                                                                                   |                                                                                      |
|                                                                | A2=Placebo                | 0                                                                                                                                   |                                                                                      |
| Cichorium intybus                                              |                           |                                                                                                                                     |                                                                                      |
| Chandra 2020                                                   | A1=Cichorium intybus      |                                                                                                                                     |                                                                                      |
|                                                                | A2=Placebo                |                                                                                                                                     |                                                                                      |
| Cinnamomum aromaticum                                          |                           |                                                                                                                                     |                                                                                      |
| Mang 2006                                                      | A1=Cinnamomum aromaticum  |                                                                                                                                     | Weight change ≥5%-2, Serious disease (exact names not provided)-4                    |
|                                                                | A2=Placebo                |                                                                                                                                     |                                                                                      |
| Suppakitiporn 2006                                             | A1=Cinnamomum aromaticum  | 0                                                                                                                                   |                                                                                      |
|                                                                | A2=Placebo                | 0                                                                                                                                   |                                                                                      |
| Blevins 2007                                                   | A1=Cinnamomum aromaticum  |                                                                                                                                     | OAD or lipid-lowering drug therapy amendment-5                                       |
|                                                                | A2=Placebo                |                                                                                                                                     |                                                                                      |
| Crawford 2009                                                  | A1=Cinnamomum aromaticum  | Rash-1                                                                                                                              | Rash-1                                                                               |
|                                                                | A2=No additional medicine | 0                                                                                                                                   |                                                                                      |
| Akilen 2010                                                    | A1=Cinnamomum aromaticum  | 0                                                                                                                                   |                                                                                      |
|                                                                | A2=Placebo                | Mild gastric upset-1                                                                                                                | Insulin therapy-2                                                                    |
| Wainstein 2011                                                 | A1=Cinnamomum aromaticum  |                                                                                                                                     |                                                                                      |

| Author and year                                                       | Study arms                         | Adverse events (including serious adverse events)                                                                                                                                                                                         | Dropouts/withdrawals/discontinued interventions due to adverse events (if mentioned) |
|-----------------------------------------------------------------------|------------------------------------|-------------------------------------------------------------------------------------------------------------------------------------------------------------------------------------------------------------------------------------------|--------------------------------------------------------------------------------------|
| <b>Ayurvedic medicine- single plant- or mineral-origin ingredient</b> |                                    |                                                                                                                                                                                                                                           |                                                                                      |
| Lu 2012                                                               | A2=Placebo                         |                                                                                                                                                                                                                                           |                                                                                      |
|                                                                       | A1= <i>Cinnamomum aromaticum</i>   |                                                                                                                                                                                                                                           |                                                                                      |
|                                                                       | A2=Placebo                         |                                                                                                                                                                                                                                           |                                                                                      |
| Sharma 2012                                                           | A1= <i>Cinnamomum aromaticum</i> ? | 0                                                                                                                                                                                                                                         |                                                                                      |
|                                                                       | A2=Placebo                         | 0                                                                                                                                                                                                                                         |                                                                                      |
| Hasanzade 2013                                                        | A1= <i>Cinnamomum aromaticum</i>   |                                                                                                                                                                                                                                           |                                                                                      |
|                                                                       | A2=Placebo                         |                                                                                                                                                                                                                                           |                                                                                      |
| Tangvarasittichai 2015, Sengsuk 2016                                  | A1= <i>Cinnamomum aromaticum</i>   | 0                                                                                                                                                                                                                                         |                                                                                      |
|                                                                       | A2=Placebo                         |                                                                                                                                                                                                                                           |                                                                                      |
| <b><i>Cinnamomum verum</i></b>                                        |                                    |                                                                                                                                                                                                                                           |                                                                                      |
| Vafa 2012                                                             | A1= <i>Cinnamomum verum</i>        | 0                                                                                                                                                                                                                                         |                                                                                      |
|                                                                       | A2=Placebo                         | 0                                                                                                                                                                                                                                         |                                                                                      |
| Zahmatkesh 2012                                                       | A1= <i>Cinnamomum verum</i>        | 0                                                                                                                                                                                                                                         |                                                                                      |
|                                                                       | A2=Placebo                         | 0                                                                                                                                                                                                                                         |                                                                                      |
| Talaee 2017                                                           | A1= <i>Cinnamomum verum</i> ?      |                                                                                                                                                                                                                                           |                                                                                      |
|                                                                       | A2=Placebo                         |                                                                                                                                                                                                                                           |                                                                                      |
| Zare 2019                                                             | A1= <i>Cinnamomum verum</i> ?      | 0                                                                                                                                                                                                                                         |                                                                                      |
|                                                                       | A2=Placebo                         | Some allergic reaction-1                                                                                                                                                                                                                  | Some allergic reaction-1                                                             |
| Mirmiranpour 2020                                                     | A1= <i>Cinnamomum verum</i>        | 0                                                                                                                                                                                                                                         |                                                                                      |
|                                                                       | A2=Placebo                         | 0                                                                                                                                                                                                                                         |                                                                                      |
| <b><i>Citrullus colocynthis</i></b>                                   |                                    |                                                                                                                                                                                                                                           |                                                                                      |
| Huseini 2009                                                          | A1= <i>Citrullus colocynthis</i>   | Mild diarrhea-3                                                                                                                                                                                                                           |                                                                                      |
|                                                                       | A2=Placebo                         |                                                                                                                                                                                                                                           |                                                                                      |
| Barghamdi 2016                                                        | A1= <i>Citrullus colocynthis</i>   | 0                                                                                                                                                                                                                                         |                                                                                      |
|                                                                       | A2=Placebo                         |                                                                                                                                                                                                                                           |                                                                                      |
| <b><i>Coccinia grandis</i></b>                                        |                                    |                                                                                                                                                                                                                                           |                                                                                      |
| Kuriyan 2008, Kurpad 2008                                             | A1= <i>Coccinia grandis</i>        | Gastrointestinal tract symptoms (such as abdominal distention, flatulence, constipation, gastritis)-7, Mild hypoglycemic symptoms (such as perspiration, excessive hunger, slight dizziness) once or twice postprandially (midmorning)-17 |                                                                                      |
|                                                                       | A2=Placebo                         | Gastrointestinal tract symptoms (such as abdominal distention, flatulence, constipation, gastritis)-8                                                                                                                                     |                                                                                      |
| Quamri 2017                                                           | A1= <i>Coccinia grandis</i>        | 0                                                                                                                                                                                                                                         |                                                                                      |
|                                                                       | A2=OAD                             | 0                                                                                                                                                                                                                                         |                                                                                      |
| Wasana 2021                                                           | A1= <i>Coccinia grandis</i>        | 0                                                                                                                                                                                                                                         |                                                                                      |
|                                                                       | A2=Placebo                         | 0                                                                                                                                                                                                                                         |                                                                                      |
| <b><i>Convolvulus prostratus</i></b>                                  |                                    |                                                                                                                                                                                                                                           |                                                                                      |
| Patel 2012                                                            | A1= <i>Convolvulus prostratus</i>  |                                                                                                                                                                                                                                           |                                                                                      |
|                                                                       | A2=No additional medicine          |                                                                                                                                                                                                                                           |                                                                                      |
| <b><i>Crocus sativus</i></b>                                          |                                    |                                                                                                                                                                                                                                           |                                                                                      |
| Milajerdi 2018                                                        | A1= <i>Crocus sativus</i>          |                                                                                                                                                                                                                                           | Headache-1                                                                           |

| Author and year                                                       | Study arms                         | Adverse events (including serious adverse events)       | Dropouts/withdrawals/discontinued interventions due to adverse events (if mentioned) |
|-----------------------------------------------------------------------|------------------------------------|---------------------------------------------------------|--------------------------------------------------------------------------------------|
| <b>Ayurvedic medicine- single plant- or mineral-origin ingredient</b> |                                    |                                                         |                                                                                      |
| Aleali 2019                                                           | A2=Placebo                         |                                                         | Headache-1                                                                           |
|                                                                       | A1= <i>Crocus sativus</i>          |                                                         | Allergy to medicine-2                                                                |
|                                                                       | A2=Placebo                         |                                                         | Allergy to medicine-2, Insulin therapy-2                                             |
| Ebrahimi 2019                                                         | A1= <i>Crocus sativus</i>          |                                                         | Stomach problem-1                                                                    |
|                                                                       | A2=Placebo                         |                                                         | Insulin therapy-2                                                                    |
| Mobasser 2020                                                         | A1= <i>Crocus sativus</i>          |                                                         |                                                                                      |
|                                                                       | A2=Placebo                         |                                                         |                                                                                      |
| <b><i>Cuminum cyminum</i></b>                                         |                                    |                                                         |                                                                                      |
| Jafari 2017                                                           | A1= <i>Cuminum cyminum</i>         |                                                         | Medicine amendment-1, Gastrointestinal complaint-1                                   |
|                                                                       | A2=Placebo                         |                                                         | Medicine amendment-1                                                                 |
| Hendre 2020                                                           | A1= <i>Cuminum cyminum</i>         |                                                         |                                                                                      |
|                                                                       | A2=No additional medicine          |                                                         |                                                                                      |
| <b><i>Curcuma longa</i></b>                                           |                                    |                                                         |                                                                                      |
| Usharani 2008                                                         | A1= <i>Curcuma longa</i>           | Mild diarrhea-2                                         |                                                                                      |
|                                                                       | A2=Placebo                         |                                                         |                                                                                      |
| Na 2013                                                               | A1= <i>Curcuma longa</i>           |                                                         |                                                                                      |
|                                                                       | A2=Placebo                         |                                                         |                                                                                      |
| Chuengsamarn 2014                                                     | A1= <i>Curcuma longa</i>           | Hot flash-1, Constipation-2, Nausea-1                   |                                                                                      |
|                                                                       | A2=Placebo                         | Hot flash-1, Constipation-1, Vertigo-1, Iching-1        |                                                                                      |
| Panahi 2017, Panahi 2018                                              | A1= <i>Curcuma longa</i>           | 0                                                       |                                                                                      |
|                                                                       | A2=Placebo                         | 0                                                       |                                                                                      |
| Adab 2019                                                             | A1= <i>Curcuma longa</i>           |                                                         | Medicine dose amendment-1, Insulin therapy-1                                         |
|                                                                       | A2=Placebo                         | 0                                                       |                                                                                      |
| Adibian 2019                                                          | A1= <i>Curcuma longa</i>           |                                                         | Stomach discomfort-1                                                                 |
|                                                                       | A2=Placebo                         |                                                         | Medicine amendment-1                                                                 |
| Srinivasan 2019                                                       | A1= <i>Curcuma longa</i>           | Increased frequency of stools-1, Upper abdominal pain-1 |                                                                                      |
|                                                                       | A2=Placebo                         | Fatigue-1, Sleepiness-2                                 | Fatigue-1                                                                            |
| de Sousa 2020                                                         | A1= <i>Curcuma longa</i>           | 0                                                       |                                                                                      |
|                                                                       | A2=Placebo                         | 0                                                       |                                                                                      |
| <b><i>Cyamopsis tetragonoloba</i></b>                                 |                                    |                                                         |                                                                                      |
| Uusitupa 1984                                                         | A1= <i>Cyamopsis tetragonoloba</i> | Exact names not provided-2 (related)                    | Exact names not provided-2 (related)                                                 |
|                                                                       | A2=Placebo                         |                                                         |                                                                                      |
| Uusitupa 1989                                                         | A1= <i>Cyamopsis tetragonoloba</i> | Flatulence-7, Heartburn-1                               |                                                                                      |
|                                                                       | A2=Placebo                         | Flatulence-1, Diarrhea-1                                |                                                                                      |
| <b><i>Eclipta prostrata</i></b>                                       |                                    |                                                         |                                                                                      |
| Sazia 2015, Sazia 2015                                                | A1= <i>Eclipta prostrata</i>       |                                                         |                                                                                      |
|                                                                       | A2=OAD                             |                                                         |                                                                                      |
|                                                                       | A3=No medicine                     |                                                         |                                                                                      |
| <b><i>Elettaria cardamomum</i></b>                                    |                                    |                                                         |                                                                                      |
| Aghasi 2019                                                           | A1= <i>Elettaria cardamomum</i>    | Dysuria-1, Mild skin inflammation-1                     | Medicine amendment-3                                                                 |

| Author and year                                                | Study arms                 | Adverse events (including serious adverse events)                                                                                                                                                                                   | Dropouts/withdrawals/discontinued interventions due to adverse events (if mentioned) |
|----------------------------------------------------------------|----------------------------|-------------------------------------------------------------------------------------------------------------------------------------------------------------------------------------------------------------------------------------|--------------------------------------------------------------------------------------|
| Ayurvedic medicine- single plant- or mineral-origin ingredient |                            |                                                                                                                                                                                                                                     |                                                                                      |
|                                                                | A2=Placebo                 | 0                                                                                                                                                                                                                                   | Sudden increase in blood glucose level-1                                             |
| Emblica officinalis                                            |                            |                                                                                                                                                                                                                                     |                                                                                      |
| Usharani 2013                                                  | A1=Emblica officinalis     | Dyspepsia-3                                                                                                                                                                                                                         |                                                                                      |
|                                                                | A2=Placebo                 | 0                                                                                                                                                                                                                                   |                                                                                      |
| Enicostemma axillare                                           |                            |                                                                                                                                                                                                                                     |                                                                                      |
| Shankarrao 2017                                                | A1=Enicostemma axillare    |                                                                                                                                                                                                                                     |                                                                                      |
|                                                                | A2=OAD                     |                                                                                                                                                                                                                                     |                                                                                      |
| Gynostemma pentaphyllum                                        |                            |                                                                                                                                                                                                                                     |                                                                                      |
| Huyen 2010                                                     | A1=Gynostemma pentaphyllum | 0                                                                                                                                                                                                                                   |                                                                                      |
|                                                                | A2=Placebo                 | 0                                                                                                                                                                                                                                   |                                                                                      |
| Huyen 2012                                                     | A1=Gynostemma pentaphyllum | 0                                                                                                                                                                                                                                   |                                                                                      |
|                                                                | A2=Placebo                 | 0                                                                                                                                                                                                                                   |                                                                                      |
| Hibiscus sabdariffa                                            |                            |                                                                                                                                                                                                                                     |                                                                                      |
| Sarbini 2019                                                   | A1=Hibiscus sabdariffa     |                                                                                                                                                                                                                                     | OAD dose/type amendment-1, Hospitalization due to illness-1?                         |
|                                                                | A2=Placebo                 |                                                                                                                                                                                                                                     |                                                                                      |
| Ipomoea batatas                                                |                            |                                                                                                                                                                                                                                     |                                                                                      |
| Ludvik 2004                                                    | A1=Ipomoea batatas         | A1=Exact names not provided-16 (relation could not be excluded-6); A2=Exact names not provided-14 (relation could not be excluded-2); Most common in A1 and A2=Mild gastrointestinal issues (constipation, gastric pain, meteorism) |                                                                                      |
|                                                                | A2=Placebo                 |                                                                                                                                                                                                                                     |                                                                                      |
| Ludvik 2008                                                    | A1=Ipomoea batatas         | A1=Exact names not provided-96; A2=Exact names not provided-120; Most common in A1 and A2=Nausea-3, Tympanites or diarrhea-3                                                                                                        |                                                                                      |
|                                                                | A2=Placebo                 |                                                                                                                                                                                                                                     |                                                                                      |
| Juglans regia                                                  |                            |                                                                                                                                                                                                                                     |                                                                                      |
| Hosseini 2014a                                                 | A1=Juglans regia           | 0                                                                                                                                                                                                                                   |                                                                                      |
|                                                                | A2=Placebo                 | 0                                                                                                                                                                                                                                   |                                                                                      |
| Hosseini 2014b                                                 | A1=Juglans regia           | Mild adverse events (such as diarrhea, vertigo, anxiety)-11                                                                                                                                                                         |                                                                                      |
|                                                                | A2=Placebo                 | Mild adverse events (such as diarrhea, vertigo, anxiety)-4                                                                                                                                                                          |                                                                                      |
| Abdoli 2017                                                    | A1=Juglans regia           | 0                                                                                                                                                                                                                                   |                                                                                      |
|                                                                | A2=Placebo                 |                                                                                                                                                                                                                                     |                                                                                      |
| Zibaeenezhad 2016, Zibaeenezhad 2017                           | A1=Juglans regia           | Gastrointestinal oil intolerance-2                                                                                                                                                                                                  | Gastrointestinal oil intolerance-2?                                                  |
|                                                                | A2=Placebo?                | 0                                                                                                                                                                                                                                   |                                                                                      |
| Rabiei 2018                                                    | A1=Juglans regia           |                                                                                                                                                                                                                                     | OAD amendment and other reasons-5                                                    |
|                                                                | A2=Placebo                 |                                                                                                                                                                                                                                     | OAD amendment and other reasons-6                                                    |
| Linum usitatissimum                                            |                            |                                                                                                                                                                                                                                     |                                                                                      |
| Barre 2008                                                     | A1=Linum usitatissimum     |                                                                                                                                                                                                                                     |                                                                                      |
|                                                                | A2=Placebo                 |                                                                                                                                                                                                                                     |                                                                                      |
| Hashemzadeh 2017                                               | A1=Linum usitatissimum     | 0                                                                                                                                                                                                                                   |                                                                                      |
|                                                                | A2=Placebo                 |                                                                                                                                                                                                                                     |                                                                                      |



| Author and year                                                       | Study arms                     | Adverse events (including serious adverse events)                                                                                                                                             | Dropouts/withdrawals/discontinued interventions due to adverse events (if mentioned)                              |
|-----------------------------------------------------------------------|--------------------------------|-----------------------------------------------------------------------------------------------------------------------------------------------------------------------------------------------|-------------------------------------------------------------------------------------------------------------------|
| <b>Ayurvedic medicine- single plant- or mineral-origin ingredient</b> |                                |                                                                                                                                                                                               |                                                                                                                   |
| <b><i>Momordica charantia</i></b>                                     |                                |                                                                                                                                                                                               |                                                                                                                   |
| Dans 2007                                                             | A1= <i>Momordica charantia</i> | Diarrhea and epigastric pain-1, Diarrhea-2, Hospitalization due to gastroenteritis-1, Hospitalization due to cholecystolithiasis-1 (unrelated), Chest pain-1, Urinary incontinence-1, Fever-1 | Diarrhea and epigastric pain-1                                                                                    |
|                                                                       | A2=Placebo                     | Diarrhea-1                                                                                                                                                                                    |                                                                                                                   |
| Zänker 2012                                                           | A1= <i>Momordica charantia</i> |                                                                                                                                                                                               | OAD amendment-6, Insulin therapy-2, OAD amendment and lost body weight-1, Lipid-lowering drug therapy amendment-5 |
|                                                                       | A2=Placebo                     |                                                                                                                                                                                               |                                                                                                                   |
| Trakoon-osot 2013                                                     | A1= <i>Momordica charantia</i> | Mild diarrhea-5, Flatulence-8                                                                                                                                                                 |                                                                                                                   |
|                                                                       | A2=Placebo                     | Flatulence-2                                                                                                                                                                                  |                                                                                                                   |
| Rahman 2015                                                           | A1= <i>Momordica charantia</i> | Hyperacidity/heart burn-8, Anorexia-10, Nausea-5, Diarrhea-3, Appetite-7, Abdominal discomfort-2, Headache-13, Dizziness-3, Skin rash-2                                                       |                                                                                                                   |
|                                                                       | A2=OAD                         | Hyperacidity/heart burn-1, Anorexia-3, Nausea-1, Appetite-3, Headache-5, Dizziness-2, Skin rash-2                                                                                             |                                                                                                                   |
| Suthar 2016a                                                          | A1= <i>Momordica charantia</i> | 0                                                                                                                                                                                             |                                                                                                                   |
|                                                                       | A2=Placebo                     | 0                                                                                                                                                                                             |                                                                                                                   |
| Suthar 2016b                                                          | A1= <i>Momordica charantia</i> | 22 mild or moderate treatment emergent adverse events (exact names not provided)-14 (mostly unrelated)<br><br>Hypotension-1 (unrelated)                                                       | Blood glucose level >270 mg/dL-2                                                                                  |
|                                                                       | A2=OAD                         | 9 mild or moderate treatment emergent adverse events (exact names not provided)-7 (mostly unrelated)<br><br>Pyrexia-1 (unrelated)                                                             |                                                                                                                   |
|                                                                       |                                |                                                                                                                                                                                               |                                                                                                                   |
| Cortez-Navarrete 2018                                                 | A1= <i>Momordica charantia</i> | Headache and dizziness-33.3%, Nausea-16.7%, Vomiting-8.3%, Constipation-8.3%                                                                                                                  |                                                                                                                   |
|                                                                       | A2=Placebo                     | Headache-25%, Constipation-16.7%, Abdominal distension-16.7%, Dizziness-8.3%, Nausea-8.3%                                                                                                     |                                                                                                                   |
| Kumari 2018                                                           | A1= <i>Momordica charantia</i> | Mild gastrointestinal discomfort such as transient dyspepsia and diarrhea-2                                                                                                                   |                                                                                                                   |
|                                                                       | A1=Placebo                     | 0                                                                                                                                                                                             |                                                                                                                   |
| Amini 2020                                                            | A1= <i>Momordica charantia</i> |                                                                                                                                                                                               |                                                                                                                   |
|                                                                       | A2=Placebo                     |                                                                                                                                                                                               |                                                                                                                   |
| Kim 2020                                                              | A1= <i>Momordica charantia</i> | Anorexia/nausea-2, Abdominal discomfort-3, Diarrhea-1, Constipation-2, Foamy urine-1, Skin rash-1                                                                                             | Exact names not provided and other reasons-14                                                                     |
|                                                                       | A2=Placebo                     | Anorexia/nausea-1, Abdominal discomfort-2, Epigastric soreness-1, Foamy urine-1, Skin rash-1                                                                                                  | Exact names not provided and other reasons-6                                                                      |
| <b><i>Nigella sativa</i></b>                                          |                                |                                                                                                                                                                                               |                                                                                                                   |

| Author and year                                                       | Study arms                    | Adverse events (including serious adverse events)                                                                                                                                                      | Dropouts/withdrawals/discontinued interventions due to adverse events (if mentioned) |
|-----------------------------------------------------------------------|-------------------------------|--------------------------------------------------------------------------------------------------------------------------------------------------------------------------------------------------------|--------------------------------------------------------------------------------------|
| <b>Ayurvedic medicine- single plant- or mineral-origin ingredient</b> |                               |                                                                                                                                                                                                        |                                                                                      |
| Najmi 2012                                                            | A1= <i>Nigella sativa</i>     | 0                                                                                                                                                                                                      |                                                                                      |
|                                                                       | A2=No additional medicine     | 0                                                                                                                                                                                                      |                                                                                      |
| Hosseini 2013                                                         | A1= <i>Nigella sativa</i>     | Mild transient nausea-4                                                                                                                                                                                |                                                                                      |
|                                                                       | A2=Placebo                    | 0                                                                                                                                                                                                      |                                                                                      |
| Hadi 2015                                                             | A1= <i>Nigella sativa</i>     |                                                                                                                                                                                                        | Insulin therapy-1?                                                                   |
|                                                                       | A2=Placebo                    |                                                                                                                                                                                                        | Insulin therapy-3?                                                                   |
| Heshmati 2015                                                         | A1= <i>Nigella sativa</i>     | Mild gastrointestinal problems-Exact numbers not provided                                                                                                                                              | Medicine amendment-1, Stomach ache-1                                                 |
|                                                                       | A2=Placebo                    |                                                                                                                                                                                                        | Stomach ache-2                                                                       |
| Kaatabi 2015                                                          | A1= <i>Nigella sativa</i>     | 0                                                                                                                                                                                                      |                                                                                      |
|                                                                       | A2=Placebo                    |                                                                                                                                                                                                        | Uncomfortable with stool color-4, Nausea-2                                           |
| Moustafa 2019                                                         | A1= <i>Nigella sativa</i>     |                                                                                                                                                                                                        | Nausea-2                                                                             |
|                                                                       | A2=OAD                        |                                                                                                                                                                                                        | Gastrointestinal tract upset-3, OAD amendment-1                                      |
| Kooshki 2020                                                          | A1= <i>Nigella sativa</i>     | 0                                                                                                                                                                                                      |                                                                                      |
|                                                                       | A2=Placebo                    | 0                                                                                                                                                                                                      |                                                                                      |
| Jangjo-Borazjani 2021                                                 | A1= <i>Nigella sativa</i>     |                                                                                                                                                                                                        |                                                                                      |
|                                                                       | A2=Placebo                    |                                                                                                                                                                                                        |                                                                                      |
| <b><i>Plantago ovata</i></b>                                          |                               |                                                                                                                                                                                                        |                                                                                      |
| Ziai 2005                                                             | A1= <i>Plantago ovata</i>     | Flatulence-4, Diarrhea-1, Constipation-1, Reduced flushing-11                                                                                                                                          |                                                                                      |
|                                                                       | A2=Placebo                    | Flatulence-13, Diarrhea-1, Constipation-1                                                                                                                                                              | Exact names not provided-5                                                           |
| Feinglos 2013                                                         | A1= <i>Plantago ovata</i>     | A1 and A2=Exact names not provided-Distributed approximately equally (80–88% of participants in each arm); A2=Transient symptoms consistent with episodes of hypoglycemia-2 (they were on OAD as well) | Exact names not provided-2                                                           |
|                                                                       | A2=Placebo                    |                                                                                                                                                                                                        |                                                                                      |
| Abutair 2016                                                          | A1= <i>Plantago ovata</i>     |                                                                                                                                                                                                        |                                                                                      |
|                                                                       | A2=No additional medicine?    |                                                                                                                                                                                                        |                                                                                      |
| <b><i>Portulaca oleracea</i></b>                                      |                               |                                                                                                                                                                                                        |                                                                                      |
| El-Sayed 2011                                                         | A1= <i>Portulaca oleracea</i> |                                                                                                                                                                                                        |                                                                                      |
|                                                                       | A2=OAD                        |                                                                                                                                                                                                        |                                                                                      |
| Farzanegi 2014                                                        | A1= <i>Portulaca oleracea</i> |                                                                                                                                                                                                        |                                                                                      |
|                                                                       | A2=Placebo                    |                                                                                                                                                                                                        |                                                                                      |
| Dehghan 2016                                                          | A1= <i>Portulaca oleracea</i> |                                                                                                                                                                                                        |                                                                                      |
|                                                                       | A2=Placebo                    |                                                                                                                                                                                                        |                                                                                      |
| Wainstein 2016                                                        | A1= <i>Portulaca oleracea</i> | Acute bronchitis-1 (unrelated), Constipation-1 (probably related), electrocardiogram (ECG) changes-1 (not assessable), Uncontrolled hypertension-1 (not assessable), Vision disturbance-1 (unrelated)  | Exact name not provided-1                                                            |
|                                                                       | A2=Placebo                    | Elevated blood glucose level-1 (probably related), Influenza-1 (unrelated), Abnormal liver enzyme levels-1 (unrelated)                                                                                 |                                                                                      |
| <b><i>Pterocarpus marsupium</i></b>                                   |                               |                                                                                                                                                                                                        |                                                                                      |

| Author and year                                                       | Study arms                       | Adverse events (including serious adverse events)                                                       | Dropouts/withdrawals/discontinued interventions due to adverse events (if mentioned)                    |
|-----------------------------------------------------------------------|----------------------------------|---------------------------------------------------------------------------------------------------------|---------------------------------------------------------------------------------------------------------|
| <b>Ayurvedic medicine- single plant- or mineral-origin ingredient</b> |                                  |                                                                                                         |                                                                                                         |
| Hariharan 2005                                                        | A1= <i>Pterocarpus marsupium</i> | 0                                                                                                       |                                                                                                         |
|                                                                       | A2=OAD                           |                                                                                                         | Dizziness on fasting-1, Insulin therapy-1                                                               |
| <b><i>Punica granatum</i></b>                                         |                                  |                                                                                                         |                                                                                                         |
| Faghihimani 2016                                                      | A1= <i>Punica granatum</i>       | Rash and itching-2, Gastrointestinal upset-1, Hospitalization due to upper gastrointestinal bleeding-1? | Rash and itching-2, Gastrointestinal upset-1, Hospitalization due to upper gastrointestinal bleeding-1? |
|                                                                       | A2=Placebo                       | Headache-1, Mild abdominal pain-2                                                                       | Headache-1, Mild abdominal pain-2                                                                       |
| Babaeian 2013                                                         | A1= <i>Punica granatum</i>       |                                                                                                         | Intolerance-2                                                                                           |
|                                                                       | A2=Placebo                       |                                                                                                         |                                                                                                         |
| Sohrab 2014, Sohrab 2015                                              | A1= <i>Punica granatum</i>       |                                                                                                         | Stomach discomfort-1                                                                                    |
|                                                                       | A2=Placebo                       |                                                                                                         | Medicine amendment-1                                                                                    |
| Khajebishak 2019a, Khajebishak 2019b                                  | A1= <i>Punica granatum</i>       | 0                                                                                                       |                                                                                                         |
|                                                                       | A2=Placebo                       |                                                                                                         |                                                                                                         |
| Grabež 2020                                                           | A1= <i>Punica granatum</i>       |                                                                                                         |                                                                                                         |
|                                                                       | A2=Placebo                       |                                                                                                         |                                                                                                         |
| Hashemi 2020                                                          | A1= <i>Punica granatum</i>       | 0                                                                                                       |                                                                                                         |
|                                                                       | A2=Placebo                       | 0                                                                                                       |                                                                                                         |
| <b><i>Sesamum indicum</i></b>                                         |                                  |                                                                                                         |                                                                                                         |
| Shahi 2017                                                            | A1= <i>Sesamum indicum</i>       |                                                                                                         | Insulin therapy-2                                                                                       |
|                                                                       | A2=Placebo                       |                                                                                                         | Medicine dose/type amendment-2                                                                          |
| Aslam 2018                                                            | A1= <i>Sesamum indicum</i>       |                                                                                                         |                                                                                                         |
|                                                                       | A2=Placebo                       |                                                                                                         |                                                                                                         |
| <b><i>Shilajit</i></b>                                                |                                  |                                                                                                         |                                                                                                         |
| Narasimha Raju 2016                                                   | A1= Shilajit                     |                                                                                                         |                                                                                                         |
|                                                                       | A2=Placebo                       |                                                                                                         |                                                                                                         |
| Niranjan 2016                                                         | A1=Shilajit                      | Mild headache-3                                                                                         |                                                                                                         |
|                                                                       | A2=Placebo                       | Dyspepsia-2                                                                                             |                                                                                                         |
| <b><i>Syzygium cumini</i></b>                                         |                                  |                                                                                                         |                                                                                                         |
| Sahana 2010                                                           | A1= <i>Syzygium cumini</i>       |                                                                                                         | Uncontrolled blood glucose level-2                                                                      |
|                                                                       | A2=OAD                           |                                                                                                         |                                                                                                         |
|                                                                       | A3=No medicine                   |                                                                                                         |                                                                                                         |
| Sidana 2016, Sidana 2017                                              | A1= <i>Syzygium cumini</i>       |                                                                                                         |                                                                                                         |
|                                                                       | A2=Placebo                       |                                                                                                         |                                                                                                         |
| <b><i>Terminalia chebula</i></b>                                      |                                  |                                                                                                         |                                                                                                         |
| Usharani 2020                                                         | A1= <i>Terminalia chebula</i>    | Dyspepsia-3                                                                                             |                                                                                                         |
|                                                                       | A2=Placebo                       | Mild headache-3                                                                                         |                                                                                                         |
| <b><i>Tinospora cordifolia</i></b>                                    |                                  |                                                                                                         |                                                                                                         |
| Mishra 2015                                                           | A1= <i>Tinospora cordifolia</i>  | 0                                                                                                       |                                                                                                         |
|                                                                       | A2=No additional medicine        |                                                                                                         |                                                                                                         |
| Roy 2015                                                              | A1= <i>Tinospora cordifolia</i>  | 0                                                                                                       |                                                                                                         |
|                                                                       | A2=No additional medicine        | 0                                                                                                       |                                                                                                         |
| <b><i>Tribulus terrestris</i></b>                                     |                                  |                                                                                                         |                                                                                                         |

| Author and year                                                       | Study arms                                | Adverse events (including serious adverse events)                                                                                                                                                                                                                                                                                                                                                                                                                                                                                                                                                                                                                                                                                     | Dropouts/withdrawals/discontinued interventions due to adverse events (if mentioned)                                                                         |
|-----------------------------------------------------------------------|-------------------------------------------|---------------------------------------------------------------------------------------------------------------------------------------------------------------------------------------------------------------------------------------------------------------------------------------------------------------------------------------------------------------------------------------------------------------------------------------------------------------------------------------------------------------------------------------------------------------------------------------------------------------------------------------------------------------------------------------------------------------------------------------|--------------------------------------------------------------------------------------------------------------------------------------------------------------|
| <b>Ayurvedic medicine- single plant- or mineral-origin ingredient</b> |                                           |                                                                                                                                                                                                                                                                                                                                                                                                                                                                                                                                                                                                                                                                                                                                       |                                                                                                                                                              |
| Samani 2016                                                           | A1= <i>Tribulus terrestris</i>            | 0                                                                                                                                                                                                                                                                                                                                                                                                                                                                                                                                                                                                                                                                                                                                     |                                                                                                                                                              |
|                                                                       | A2=Placebo                                | 0                                                                                                                                                                                                                                                                                                                                                                                                                                                                                                                                                                                                                                                                                                                                     |                                                                                                                                                              |
| <b><i>Trigonella foenum-graecum</i></b>                               |                                           |                                                                                                                                                                                                                                                                                                                                                                                                                                                                                                                                                                                                                                                                                                                                       |                                                                                                                                                              |
| Gupta 2001                                                            | A1= <i>Trigonella foenum-graecum</i>      | Dyspepsia and mild abdominal distension-5                                                                                                                                                                                                                                                                                                                                                                                                                                                                                                                                                                                                                                                                                             |                                                                                                                                                              |
|                                                                       | A2=Placebo                                |                                                                                                                                                                                                                                                                                                                                                                                                                                                                                                                                                                                                                                                                                                                                       |                                                                                                                                                              |
| Lu 2008                                                               | A1= <i>Trigonella foenum-graecum</i>      | Stomach discomfort and nausea-2, Diarrhea-1                                                                                                                                                                                                                                                                                                                                                                                                                                                                                                                                                                                                                                                                                           |                                                                                                                                                              |
|                                                                       | A2=Placebo                                |                                                                                                                                                                                                                                                                                                                                                                                                                                                                                                                                                                                                                                                                                                                                       |                                                                                                                                                              |
| Ansari 2011                                                           | A1= <i>Trigonella foenum-graecum</i>      |                                                                                                                                                                                                                                                                                                                                                                                                                                                                                                                                                                                                                                                                                                                                       |                                                                                                                                                              |
|                                                                       | A2=No additional medicine                 |                                                                                                                                                                                                                                                                                                                                                                                                                                                                                                                                                                                                                                                                                                                                       |                                                                                                                                                              |
| Rafraf 2014                                                           | A1= <i>Trigonella foenum-graecum</i>      | 0                                                                                                                                                                                                                                                                                                                                                                                                                                                                                                                                                                                                                                                                                                                                     |                                                                                                                                                              |
|                                                                       | A2=Placebo                                | 0                                                                                                                                                                                                                                                                                                                                                                                                                                                                                                                                                                                                                                                                                                                                     |                                                                                                                                                              |
| Suchitra 2015                                                         | A1= <i>Trigonella foenum-graecum</i>      | 0                                                                                                                                                                                                                                                                                                                                                                                                                                                                                                                                                                                                                                                                                                                                     |                                                                                                                                                              |
|                                                                       | A2=No additional medicine                 | 0                                                                                                                                                                                                                                                                                                                                                                                                                                                                                                                                                                                                                                                                                                                                     |                                                                                                                                                              |
| Kaur 2016                                                             | A1= <i>Trigonella foenum-graecum</i>      | Mild diarrhea-1, Flatulence-1, Mild nausea/vomiting-1, Mild facial swelling-1, Mild itching-1                                                                                                                                                                                                                                                                                                                                                                                                                                                                                                                                                                                                                                         |                                                                                                                                                              |
|                                                                       | A2=No additional medicine                 | 0                                                                                                                                                                                                                                                                                                                                                                                                                                                                                                                                                                                                                                                                                                                                     |                                                                                                                                                              |
| Singh 2016                                                            | A1= <i>Trigonella foenum-graecum</i>      | Mild dyspepsia-2, Flatulence/mild abdominal bloating-4, Mild diarrhea-1, Mild pain abdomen and mild abdominal bloating-1                                                                                                                                                                                                                                                                                                                                                                                                                                                                                                                                                                                                              |                                                                                                                                                              |
|                                                                       | A2= <i>Trigonella foenum-graecum</i> +OAD | Flatulence/mild abdominal bloating-2                                                                                                                                                                                                                                                                                                                                                                                                                                                                                                                                                                                                                                                                                                  |                                                                                                                                                              |
|                                                                       | A3=OAD                                    | Mild nausea-1, Mild hypoglycemia-1, Mild headache-2                                                                                                                                                                                                                                                                                                                                                                                                                                                                                                                                                                                                                                                                                   |                                                                                                                                                              |
| Verma 2016                                                            | A1= <i>Trigonella foenum-graecum</i>      |                                                                                                                                                                                                                                                                                                                                                                                                                                                                                                                                                                                                                                                                                                                                       |                                                                                                                                                              |
|                                                                       | A2=Placebo                                |                                                                                                                                                                                                                                                                                                                                                                                                                                                                                                                                                                                                                                                                                                                                       |                                                                                                                                                              |
| Ranade 2017                                                           | A1= <i>Trigonella foenum-graecum</i>      |                                                                                                                                                                                                                                                                                                                                                                                                                                                                                                                                                                                                                                                                                                                                       |                                                                                                                                                              |
|                                                                       | A2=No additional medicine                 |                                                                                                                                                                                                                                                                                                                                                                                                                                                                                                                                                                                                                                                                                                                                       |                                                                                                                                                              |
| Gholaman 2018                                                         | A1= <i>Trigonella foenum-graecum</i>      |                                                                                                                                                                                                                                                                                                                                                                                                                                                                                                                                                                                                                                                                                                                                       |                                                                                                                                                              |
|                                                                       | A2=Placebo                                |                                                                                                                                                                                                                                                                                                                                                                                                                                                                                                                                                                                                                                                                                                                                       |                                                                                                                                                              |
| Kandhare 2018                                                         | A1= <i>Trigonella foenum-graecum</i>      | Musculoskeletal system disorders-4, Central and peripheral nervous system-10, Vision disorders-1, Psychiatric disorders-2, Gastrointestinal system disorders-10, Liver and biliary system-9, Metabolic and nutritional disorders-42, Cardiovascular disorders-7, Heart rate and rhythm disorders-2, Respiratory system disorders-6, Red blood cell disorders-8, White cells disorders-8, Platelet bleeding and clotting disorders-1, Urinary system disorders-4, Female reproductive disorders-1, Body as a whole (general disorders)-30, Resistance mechanism disorders-4, Total drug-related adverse events (exact names not provided)-25<br><br>Hypoglycemia-10 (related), 2 (unrelated)<br><br>Hypertriglyceridemia-1 (unrelated) | Failure of medicine and adverse event (exact name not provided)-1, Exact names not provided-3, Adverse events (exact names not provided) and other reasons-4 |

| Author and year                                                       | Study arms                                                        | Adverse events (including serious adverse events)                                                                                                                                                                                                                                                                                                                                                                                                                                                                                                                                                                                                                                                                                                                                                | Dropouts/withdrawals/discontinued interventions due to adverse events (if mentioned)                             |
|-----------------------------------------------------------------------|-------------------------------------------------------------------|--------------------------------------------------------------------------------------------------------------------------------------------------------------------------------------------------------------------------------------------------------------------------------------------------------------------------------------------------------------------------------------------------------------------------------------------------------------------------------------------------------------------------------------------------------------------------------------------------------------------------------------------------------------------------------------------------------------------------------------------------------------------------------------------------|------------------------------------------------------------------------------------------------------------------|
| <b>Ayurvedic medicine- single plant- or mineral-origin ingredient</b> |                                                                   |                                                                                                                                                                                                                                                                                                                                                                                                                                                                                                                                                                                                                                                                                                                                                                                                  |                                                                                                                  |
|                                                                       | A2=Placebo                                                        | <p>Skin and appendages disorders-3, Musculoskeletal system disorders-2, Central and peripheral nervous system-8, Autonomic nervous system disorders-1, Vision disorders-1, Hearing and vestibular disorders-1, Psychiatric disorders-3, Gastrointestinal system disorders-13, Liver and biliary system-9, Metabolic and nutritional disorders-43, Cardiovascular disorders-2, Heart rate and rhythm disorders-2, Respiratory system disorders-6, Red blood cell disorders-2, White cells disorders-13, Platelet bleeding and clotting disorders-1, Urinary system disorders-3, Female reproductive disorders-1, Body as a whole (general disorders)-28, Total drug-related adverse events (exact names not provided)-19</p> <p>Hypoglycemia-3 (related), 2 (unrelated)</p> <p>Leucocytosis-1</p> | Failure of medicine-1, Exact names not provided-2, Adverse events (exact names not provided) and other reasons-9 |
| Hassani 2019                                                          | A1= <i>Trigonella foenum-graecum</i><br>A2=Placebo                |                                                                                                                                                                                                                                                                                                                                                                                                                                                                                                                                                                                                                                                                                                                                                                                                  |                                                                                                                  |
| Hota 2019                                                             | A1= <i>Trigonella foenum-graecum</i><br>A2=No additional medicine | 0<br>0                                                                                                                                                                                                                                                                                                                                                                                                                                                                                                                                                                                                                                                                                                                                                                                           |                                                                                                                  |
| Najdi 2019                                                            | A1= <i>Trigonella foenum-graecum</i><br>A2=OAD                    | Hypoglycemia-1<br>0                                                                                                                                                                                                                                                                                                                                                                                                                                                                                                                                                                                                                                                                                                                                                                              | Medicine amendment and other reasons-1<br>Medicine amendment and other reasons-2                                 |
| Rashid 2019                                                           | A1= <i>Trigonella foenum-graecum</i><br>A2=Placebo                | 0                                                                                                                                                                                                                                                                                                                                                                                                                                                                                                                                                                                                                                                                                                                                                                                                |                                                                                                                  |
| Hadi 2020                                                             | A1= <i>Trigonella foenum-graecum</i><br>A2=No additional medicine | 0                                                                                                                                                                                                                                                                                                                                                                                                                                                                                                                                                                                                                                                                                                                                                                                                | OAD dose amendment-1                                                                                             |
| <b><i>Urtica dioica</i></b>                                           |                                                                   |                                                                                                                                                                                                                                                                                                                                                                                                                                                                                                                                                                                                                                                                                                                                                                                                  |                                                                                                                  |
| Namazi 2011,<br>Esfanjani 2012a,<br>Esfanjani 2012b                   | A1= <i>Urtica dioica</i><br>A2=Placebo                            |                                                                                                                                                                                                                                                                                                                                                                                                                                                                                                                                                                                                                                                                                                                                                                                                  | Insulin therapy-2, Nausea-1                                                                                      |
| Kianbakht 2013                                                        | A1= <i>Urtica dioica</i><br>A2=Placebo                            | 0<br>0                                                                                                                                                                                                                                                                                                                                                                                                                                                                                                                                                                                                                                                                                                                                                                                           |                                                                                                                  |
| Khajeh-Mehrizi 2014                                                   | A1= <i>Urtica dioica</i><br>A2=Placebo                            |                                                                                                                                                                                                                                                                                                                                                                                                                                                                                                                                                                                                                                                                                                                                                                                                  | Illness (exact names not provided)-2<br>Illness (exact names not provided)-4                                     |
| Dabagh 2016                                                           | A1= <i>Urtica dioica</i><br>A2=No additional medicine             |                                                                                                                                                                                                                                                                                                                                                                                                                                                                                                                                                                                                                                                                                                                                                                                                  |                                                                                                                  |
| Hassani 2016                                                          | A1= <i>Urtica dioica</i><br>A2=Placebo                            |                                                                                                                                                                                                                                                                                                                                                                                                                                                                                                                                                                                                                                                                                                                                                                                                  |                                                                                                                  |
| Dadvar 2017                                                           | A1= <i>Urtica dioica</i><br>A2=No additional medicine             |                                                                                                                                                                                                                                                                                                                                                                                                                                                                                                                                                                                                                                                                                                                                                                                                  |                                                                                                                  |
| Ghalavand 2017                                                        | A1= <i>Urtica dioica</i>                                          |                                                                                                                                                                                                                                                                                                                                                                                                                                                                                                                                                                                                                                                                                                                                                                                                  |                                                                                                                  |

| Author and year                                                                                                                                                                                                                                                   | Study arms                                                                                                                                                                                                                                                            | Adverse events (including serious adverse events) | Dropouts/withdrawals/discontinued interventions due to adverse events (if mentioned) |
|-------------------------------------------------------------------------------------------------------------------------------------------------------------------------------------------------------------------------------------------------------------------|-----------------------------------------------------------------------------------------------------------------------------------------------------------------------------------------------------------------------------------------------------------------------|---------------------------------------------------|--------------------------------------------------------------------------------------|
| Ayurvedic medicine- single plant- or mineral-origin ingredient                                                                                                                                                                                                    |                                                                                                                                                                                                                                                                       |                                                   |                                                                                      |
|                                                                                                                                                                                                                                                                   | A2=No additional medicine                                                                                                                                                                                                                                             |                                                   |                                                                                      |
| Korani 2017                                                                                                                                                                                                                                                       | A1= <i>Urtica dioica</i>                                                                                                                                                                                                                                              | Itching-1                                         |                                                                                      |
|                                                                                                                                                                                                                                                                   | A2=Placebo                                                                                                                                                                                                                                                            | 0                                                 |                                                                                      |
| Mohammadnia 2017                                                                                                                                                                                                                                                  | A1= <i>Urtica dioica</i>                                                                                                                                                                                                                                              |                                                   |                                                                                      |
|                                                                                                                                                                                                                                                                   | A2=Placebo                                                                                                                                                                                                                                                            |                                                   |                                                                                      |
| <i>Vernonia cinerea</i>                                                                                                                                                                                                                                           |                                                                                                                                                                                                                                                                       |                                                   |                                                                                      |
| Sayeed 2013                                                                                                                                                                                                                                                       | A1= <i>Vernonia cinerea</i>                                                                                                                                                                                                                                           | 0                                                 |                                                                                      |
|                                                                                                                                                                                                                                                                   | A2=Placebo                                                                                                                                                                                                                                                            |                                                   |                                                                                      |
| <i>Withania coagulans</i>                                                                                                                                                                                                                                         |                                                                                                                                                                                                                                                                       |                                                   |                                                                                      |
| Hemalatha 2018                                                                                                                                                                                                                                                    | A1= <i>Withania coagulans</i>                                                                                                                                                                                                                                         |                                                   |                                                                                      |
|                                                                                                                                                                                                                                                                   | A2=Placebo                                                                                                                                                                                                                                                            |                                                   |                                                                                      |
| <i>Withania somnifera</i>                                                                                                                                                                                                                                         |                                                                                                                                                                                                                                                                       |                                                   |                                                                                      |
| Usharani 2014                                                                                                                                                                                                                                                     | A1= <i>Withania somnifera</i>                                                                                                                                                                                                                                         |                                                   | Abnormal laboratory reports? (exact names not provided)-4                            |
|                                                                                                                                                                                                                                                                   | A2=Placebo                                                                                                                                                                                                                                                            |                                                   |                                                                                      |
| <i>Zingiber officinale</i>                                                                                                                                                                                                                                        |                                                                                                                                                                                                                                                                       |                                                   |                                                                                      |
| Mahluji 2013                                                                                                                                                                                                                                                      | A1= <i>Zingiber officinale</i>                                                                                                                                                                                                                                        | Slight heart burn-2                               | Medicine failure-2, Medicine amendment-1                                             |
|                                                                                                                                                                                                                                                                   | A2=Placebo                                                                                                                                                                                                                                                            |                                                   | Medicine failure-1                                                                   |
| Arablou 2014a, Arablou 2014b                                                                                                                                                                                                                                      | A1= <i>Zingiber officinale</i>                                                                                                                                                                                                                                        |                                                   | Heartburn-1                                                                          |
|                                                                                                                                                                                                                                                                   | A2=Placebo                                                                                                                                                                                                                                                            |                                                   | Insulin therapy-1                                                                    |
| Mozaffari-Khosravi 2014, Talaei 2017, Talaei 2018                                                                                                                                                                                                                 | A1= <i>Zingiber officinale</i>                                                                                                                                                                                                                                        | 0                                                 |                                                                                      |
|                                                                                                                                                                                                                                                                   | A2=Placebo                                                                                                                                                                                                                                                            | 0                                                 |                                                                                      |
| Shidfar 2015                                                                                                                                                                                                                                                      | A1= <i>Zingiber officinale</i>                                                                                                                                                                                                                                        |                                                   |                                                                                      |
|                                                                                                                                                                                                                                                                   | A2=Placebo                                                                                                                                                                                                                                                            |                                                   |                                                                                      |
| Arzati 2017, Zarezadeh 2018                                                                                                                                                                                                                                       | A1= <i>Zingiber officinale</i>                                                                                                                                                                                                                                        |                                                   | Insulin therapy-1                                                                    |
|                                                                                                                                                                                                                                                                   | A2=Placebo                                                                                                                                                                                                                                                            |                                                   | Gastrointestinal intolerance-1                                                       |
| Mohammadi 2017, Mohammadi 2019                                                                                                                                                                                                                                    | A1= <i>Zingiber officinale</i>                                                                                                                                                                                                                                        |                                                   |                                                                                      |
|                                                                                                                                                                                                                                                                   | A2=Placebo                                                                                                                                                                                                                                                            |                                                   |                                                                                      |
| Carvalho 2020                                                                                                                                                                                                                                                     | A1= <i>Zingiber officinale</i>                                                                                                                                                                                                                                        | Diarrhoea-1, Gastrointestinal discomfort-1        | Exact name not provided-1                                                            |
|                                                                                                                                                                                                                                                                   | A2=Placebo                                                                                                                                                                                                                                                            |                                                   | Exact name not provided-1                                                            |
| Gholinezhad 2020                                                                                                                                                                                                                                                  | A1= <i>Zingiber officinale</i>                                                                                                                                                                                                                                        | 0                                                 |                                                                                      |
|                                                                                                                                                                                                                                                                   | A2=Placebo                                                                                                                                                                                                                                                            |                                                   |                                                                                      |
| <i>Ziziphus mauritiana</i>                                                                                                                                                                                                                                        |                                                                                                                                                                                                                                                                       |                                                   |                                                                                      |
| Yazdanpanah 2017                                                                                                                                                                                                                                                  | A1= <i>Ziziphus mauritiana</i>                                                                                                                                                                                                                                        |                                                   | Hypotension-1, Hives-1                                                               |
|                                                                                                                                                                                                                                                                   | A2=No additional medicine                                                                                                                                                                                                                                             |                                                   | Medicine amendment-1, Insulin therapy-2                                              |
| <i>Acalypha indica</i> / <i>Allium cepa</i> / <i>Allium sativum</i> / <i>Azadirachta indica</i> / <i>Mangifera indica</i> / <i>Murraya koenigii</i> / <i>Musa sapientum</i> / <i>Ocimum tenuiflorum</i> / <i>Phyllanthus amarus</i> / <i>Tinospora cordifolia</i> |                                                                                                                                                                                                                                                                       |                                                   |                                                                                      |
| Balasubramaniam 2010                                                                                                                                                                                                                                              | A1= <i>Acalypha indica</i> / <i>Allium cepa</i> / <i>Allium sativum</i> / <i>Azadirachta indica</i> / <i>Mangifera indica</i> / <i>Murraya koenigii</i> / <i>Musa sapientum</i> / <i>Ocimum tenuiflorum</i> / <i>Phyllanthus amarus</i> / <i>Tinospora cordifolia</i> |                                                   |                                                                                      |

| Author and year                                                                     | Study arms                                                       | Adverse events (including serious adverse events)                          | Dropouts/withdrawals/discontinued interventions due to adverse events (if mentioned) |
|-------------------------------------------------------------------------------------|------------------------------------------------------------------|----------------------------------------------------------------------------|--------------------------------------------------------------------------------------|
| Ayurvedic medicine- single plant- or mineral-origin ingredient                      |                                                                  |                                                                            |                                                                                      |
|                                                                                     | A2=Placebo                                                       |                                                                            |                                                                                      |
| Allium sativum; Cuminum cyminum                                                     |                                                                  |                                                                            |                                                                                      |
| Mansouri 2018                                                                       | A1=Allium sativum                                                | 0?                                                                         |                                                                                      |
|                                                                                     | A2=Cuminum cyminum                                               | 0?                                                                         |                                                                                      |
|                                                                                     | A3=Placebo                                                       |                                                                            |                                                                                      |
| Aloe vera; Pterocarpus marsupium; Aloe vera+Pterocarpus marsupium                   |                                                                  |                                                                            |                                                                                      |
| Maurya 2017                                                                         | A1=Aloe vera                                                     | 0?                                                                         |                                                                                      |
|                                                                                     | A2=Pterocarpus marsupium                                         | Diarrhea and flatulence?-1                                                 |                                                                                      |
|                                                                                     | A3=Aloe vera+Pterocarpus marsupium                               | 0?                                                                         |                                                                                      |
|                                                                                     | A4=OAD                                                           |                                                                            |                                                                                      |
| Cinnamomum verum; Crocus sativus; Elettaria cardamomum; Zingiber officinale         |                                                                  |                                                                            |                                                                                      |
| Azimi 2014, Azimi 2016                                                              | A1=Cinnamomum verum                                              | 0                                                                          |                                                                                      |
|                                                                                     | A2=Crocus sativus                                                | 0                                                                          |                                                                                      |
|                                                                                     | A3=Elettaria cardamomum                                          | 0                                                                          |                                                                                      |
|                                                                                     | A4=Zingiber officinale                                           | 0                                                                          |                                                                                      |
|                                                                                     | A5=Placebo                                                       |                                                                            |                                                                                      |
| Enicostemma axillare; Shilajit                                                      |                                                                  |                                                                            |                                                                                      |
| Kumar 2014                                                                          | A1=Enicostemma axillare                                          | 0                                                                          |                                                                                      |
|                                                                                     | A2=Shilajit                                                      | 0                                                                          |                                                                                      |
|                                                                                     | A3=OAD                                                           |                                                                            |                                                                                      |
| Enicostemma axillare+Emblica officinalis+Tinospora cordifolia                       |                                                                  |                                                                            |                                                                                      |
| Sharma 2019                                                                         | A1=Enicostemma axillare+Emblica officinalis+Tinospora cordifolia |                                                                            |                                                                                      |
|                                                                                     | A2=No additional medicine                                        |                                                                            |                                                                                      |
| Linum usitatissimum; Plantago ovata                                                 |                                                                  |                                                                            |                                                                                      |
| Ricklefs-Johnson 2017                                                               | A1=Linum usitatissimum                                           | 0                                                                          |                                                                                      |
|                                                                                     | A2=Plantago ovata                                                |                                                                            |                                                                                      |
| Syzygium cumini+Withania coagulans                                                  |                                                                  |                                                                            |                                                                                      |
| Siddiqui 2017                                                                       | A1=Syzygium cumini+Withania coagulans                            | 0                                                                          |                                                                                      |
|                                                                                     | A2=OAD                                                           | 0                                                                          |                                                                                      |
| Trigonella foenum-graecum; Aegle marmelos; Trigonella foenum-graecum+Aegle marmelos |                                                                  |                                                                            |                                                                                      |
| Yaheya 2009                                                                         | A1=Trigonella foenum-graecum                                     | Flatulence-Exact numbers not provided, Headache-Exact numbers not provided |                                                                                      |
|                                                                                     | A2=Aegle marmelos                                                |                                                                            |                                                                                      |
|                                                                                     | A3=Trigonella foenum-graecum+Aegle marmelos                      |                                                                            |                                                                                      |
|                                                                                     | A4=No additional medicine                                        |                                                                            |                                                                                      |
| Ayurvedic medicine- combination of plant- and/or mineral-origin ingredients§        |                                                                  |                                                                            |                                                                                      |
| AYUBES                                                                              |                                                                  |                                                                            |                                                                                      |
| Godatwar 2019                                                                       | A1=AYUBES                                                        | Exact names not provided-13 (mostly unrelated)                             |                                                                                      |
|                                                                                     | A2=Placebo                                                       | Exact names not provided-12 (mostly unrelated)                             |                                                                                      |
| BGR-34                                                                              |                                                                  |                                                                            |                                                                                      |
| Gupta 2018                                                                          | A1=BGR-34                                                        | 0                                                                          |                                                                                      |

| Author and year                                                                                                   | Study arms                                 | Adverse events (including serious adverse events) | Dropouts/withdrawals/discontinued interventions due to adverse events (if mentioned)                                                                                   |
|-------------------------------------------------------------------------------------------------------------------|--------------------------------------------|---------------------------------------------------|------------------------------------------------------------------------------------------------------------------------------------------------------------------------|
| Ayurvedic medicine- single plant- or mineral-origin ingredient                                                    |                                            |                                                   |                                                                                                                                                                        |
|                                                                                                                   | A2=Placebo                                 | 0                                                 |                                                                                                                                                                        |
| Bilvadi Churna; Kiratadi Churna                                                                                   |                                            |                                                   |                                                                                                                                                                        |
| Kumari 2016                                                                                                       | A1=Bilvadi Churna                          |                                                   |                                                                                                                                                                        |
|                                                                                                                   | A2=Kiratadi Churna                         |                                                   |                                                                                                                                                                        |
|                                                                                                                   | A3=Placebo                                 |                                                   |                                                                                                                                                                        |
| CardiPro                                                                                                          |                                            |                                                   |                                                                                                                                                                        |
| Fatima 2012                                                                                                       | A1=CardiPro                                | Diarrhea-2                                        |                                                                                                                                                                        |
|                                                                                                                   | A2=Placebo                                 | Dyspepsia-1                                       |                                                                                                                                                                        |
| Cogent db                                                                                                         |                                            |                                                   |                                                                                                                                                                        |
| Shekhar 2002                                                                                                      | A1=Cogent db                               | Mild diarrhea-4                                   |                                                                                                                                                                        |
|                                                                                                                   | A2=No additional medicine                  | 0                                                 |                                                                                                                                                                        |
| DCBT 2345                                                                                                         |                                            |                                                   |                                                                                                                                                                        |
| Mohan 2001                                                                                                        | A1=DCBT 2345                               |                                                   | Associated illness (vomiting, hepatitis, abdominal tuberculosis, urinary tract infection and coronary artery disease)-6, Insulin therapy due to severe hyperglycemia-6 |
|                                                                                                                   | A2=Placebo                                 |                                                   |                                                                                                                                                                        |
| Diabetea tea                                                                                                      |                                            |                                                   |                                                                                                                                                                        |
| Mahmoud 2016                                                                                                      | A1=Diabetea tea                            | 0                                                 |                                                                                                                                                                        |
|                                                                                                                   | A2=Placebo                                 |                                                   |                                                                                                                                                                        |
| Emblica officinalis; Withania somnifera; Emblica officinalis, Withania somnifera                                  |                                            |                                                   |                                                                                                                                                                        |
| Usharani 2014                                                                                                     | A1=Emblica officinalis                     | Dyspepsia-3                                       |                                                                                                                                                                        |
|                                                                                                                   | A2=Withania somnifera                      |                                                   |                                                                                                                                                                        |
|                                                                                                                   | A3=Emblica officinalis, Withania somnifera |                                                   |                                                                                                                                                                        |
| Herbal combination                                                                                                |                                            |                                                   |                                                                                                                                                                        |
| Shokoohi 2017                                                                                                     | A1=Herbal combination                      | 0                                                 |                                                                                                                                                                        |
|                                                                                                                   | A2=Placebo                                 | 0                                                 |                                                                                                                                                                        |
| Hyponidd                                                                                                          |                                            |                                                   |                                                                                                                                                                        |
| Poongothai 2002                                                                                                   | A1=Hyponidd                                |                                                   | Severe hyperglycemia-2, Transient increase in Serum Glutamate Oxaloacetate Transaminase (SGOT) and Serum Glutamate Pyruvate Transaminase (SGPT) levels-1               |
|                                                                                                                   | A2=Placebo                                 |                                                   |                                                                                                                                                                        |
| Inolter                                                                                                           |                                            |                                                   |                                                                                                                                                                        |
| Agrawal 2002                                                                                                      | A1=Inolter                                 | 0                                                 |                                                                                                                                                                        |
|                                                                                                                   | A2=Placebo                                 | 0                                                 |                                                                                                                                                                        |
| Kalpit                                                                                                            |                                            |                                                   |                                                                                                                                                                        |
| Agarwal 2013                                                                                                      | A1=Kalpit                                  | 0                                                 |                                                                                                                                                                        |
|                                                                                                                   | A2=Kalpit+OAD                              |                                                   |                                                                                                                                                                        |
|                                                                                                                   | A3=OAD                                     |                                                   |                                                                                                                                                                        |
| Khadira-Kramuka Kashaya Ghanavati; Nishamalaki, Shilajit; Khadira-Kramuka Kashaya Ghanavati+Nishamalaki, Shilajit |                                            |                                                   |                                                                                                                                                                        |
| Paliwal 2018                                                                                                      | A1=Khadira-Kramuka Kashaya Ghanavati       | 0                                                 |                                                                                                                                                                        |
|                                                                                                                   | A2=Nishamalaki, Shilajit                   | 0                                                 |                                                                                                                                                                        |



| Author and year                                                                     | Study arms                                                    | Adverse events (including serious adverse events)                                                                      | Dropouts/withdrawals/discontinued interventions due to adverse events (if mentioned) |
|-------------------------------------------------------------------------------------|---------------------------------------------------------------|------------------------------------------------------------------------------------------------------------------------|--------------------------------------------------------------------------------------|
| Ayurvedic medicine- single plant- or mineral-origin ingredient                      |                                                               |                                                                                                                        |                                                                                      |
|                                                                                     | A3=Khadira-Kramuka Kashaya<br>Ghanavati+Nishamalaki, Shilajit | 0                                                                                                                      |                                                                                      |
| Lodhradi Kashaya Ghana Vati                                                         |                                                               |                                                                                                                        |                                                                                      |
| Bramhankar 2017                                                                     | A1=Lodhradi Kashaya Ghana Vati                                |                                                                                                                        |                                                                                      |
|                                                                                     | A2=Lodhradi Kashaya Ghana Vati+OAD                            |                                                                                                                        |                                                                                      |
|                                                                                     | A3=OAD                                                        |                                                                                                                        |                                                                                      |
| Madhumeha Nashini Gutika; Darvyadi Kwatha; Madhumeha Nashini Gutika+Darvyadi Kwatha |                                                               |                                                                                                                        |                                                                                      |
| Bhawana 2015                                                                        | A1=Madhumeha Nashini Gutika                                   | 0                                                                                                                      |                                                                                      |
|                                                                                     | A2=Darvyadi Kwatha                                            | 0                                                                                                                      |                                                                                      |
|                                                                                     | A3=Madhumeha Nashini Gutika+Darvyadi Kwatha                   | 0                                                                                                                      |                                                                                      |
| Mamajjaka Ghana Vati; Tejashiladi Vati                                              |                                                               |                                                                                                                        |                                                                                      |
| Bhagat 2017                                                                         | A1=Mamajjaka Ghana Vati                                       | 0                                                                                                                      |                                                                                      |
|                                                                                     | A2=Tejashiladi Vati                                           | 0                                                                                                                      |                                                                                      |
| Mamajjaka Ghana Vati; Trikatu Gutika                                                |                                                               |                                                                                                                        |                                                                                      |
| Kataria 2017                                                                        | A1=Mamajjaka Ghana Vati                                       |                                                                                                                        |                                                                                      |
|                                                                                     | A2=Trikatu Gutika                                             |                                                                                                                        |                                                                                      |
| Mehagni                                                                             |                                                               |                                                                                                                        |                                                                                      |
| Gopalakrishna 2017                                                                  | A1=Mehagni                                                    |                                                                                                                        |                                                                                      |
|                                                                                     | A2=No additional medicine                                     |                                                                                                                        |                                                                                      |
| Mustadi Kwatha Ghana Vati                                                           |                                                               |                                                                                                                        |                                                                                      |
| Kushwaha 2017                                                                       | A1=Mustadi Kwatha Ghana Vati                                  | 0                                                                                                                      |                                                                                      |
|                                                                                     | A2=Placebo                                                    |                                                                                                                        |                                                                                      |
| Naga Bhasma, Nishamalaki; Nishamalaki, Hordeum vulgare                              |                                                               |                                                                                                                        |                                                                                      |
| Desale 2018                                                                         | A1=Naga Bhasma, Nishamalaki                                   | 0                                                                                                                      | Hysterectomy-1                                                                       |
|                                                                                     | A2=Nishamalaki, Hordeum vulgare                               | 0                                                                                                                      |                                                                                      |
| Nigella sativa, Trigonella foenum-graecum                                           |                                                               |                                                                                                                        |                                                                                      |
| Memon 2010a,<br>Memon 2010b,<br>Memon 2012                                          | A1=Nigella sativa, Trigonella foenum-graecum                  |                                                                                                                        |                                                                                      |
|                                                                                     | A2=No additional medicine                                     |                                                                                                                        |                                                                                      |
| Nisha Katakadi Kashaya; Yashad Bhasma; Nisha Katakadi Kashaya+Yashad Bhasma         |                                                               |                                                                                                                        |                                                                                      |
| Srinivas 2018                                                                       | A1=Nisha Katakadi Kashaya                                     |                                                                                                                        |                                                                                      |
|                                                                                     | A2=Yashad Bhasma                                              |                                                                                                                        |                                                                                      |
|                                                                                     | A3=Nisha Katakadi Kashaya+Yashad Bhasma                       |                                                                                                                        |                                                                                      |
| Pancreas tonic                                                                      |                                                               |                                                                                                                        |                                                                                      |
| Hsia 2004                                                                           | A1=Pancreas tonic                                             | Sore throat, Itchy eyes, Migraine headache-4?,<br>Exacerbation of back and leg pain-1, Mild hypoglycemia-1 (unrelated) |                                                                                      |
|                                                                                     | A2=Placebo                                                    | Nightmares, Dizzy spells, Abdominal pain, Flank pain, Insomnia, Leg numbness, Weakness on exertion-5?                  | Hospitalization due to angina exacerbation-1                                         |
| Polyherbal formulation                                                              |                                                               |                                                                                                                        |                                                                                      |
| Awasthi 2015                                                                        | A1=Polyherbal formulation                                     |                                                                                                                        | OAD due to uncontrolled blood glucose level-6                                        |

| Author and year                                                                                | Study arms                                                                              | Adverse events (including serious adverse events)                                                                                               | Dropouts/withdrawals/discontinued interventions due to adverse events (if mentioned) |
|------------------------------------------------------------------------------------------------|-----------------------------------------------------------------------------------------|-------------------------------------------------------------------------------------------------------------------------------------------------|--------------------------------------------------------------------------------------|
| Ayurvedic medicine- single plant- or mineral-origin ingredient                                 |                                                                                         |                                                                                                                                                 |                                                                                      |
|                                                                                                | A2=OAD                                                                                  |                                                                                                                                                 | OAD amendment due to uncontrolled blood glucose level-5                              |
| Salasaradi Kashaya+Shilajit+Trivanga Bhasma+Tinospora cordifolia, Azadirachta indica; Hyponidd |                                                                                         |                                                                                                                                                 |                                                                                      |
| Bhat 2012                                                                                      | A1=Salasaradi Kashaya+Shilajit+Trivanga Bhasma+Tinospora cordifolia, Azadirachta indica |                                                                                                                                                 | Aggravation of T2DM symptoms-Few (exact names and numbers not provided)              |
|                                                                                                | A2=Hyponidd                                                                             |                                                                                                                                                 |                                                                                      |
| Shilajit; Asanadi Ghana Vati                                                                   |                                                                                         |                                                                                                                                                 |                                                                                      |
| Gupta 2016                                                                                     | A1=Shilajit                                                                             | 0                                                                                                                                               |                                                                                      |
|                                                                                                | A2=Asanadi Ghana Vati                                                                   | 0                                                                                                                                               |                                                                                      |
| Swarnamakshika Bhasma                                                                          |                                                                                         |                                                                                                                                                 |                                                                                      |
| Taviad 2016                                                                                    | A1=Swarnamakshika Bhasma                                                                | 0                                                                                                                                               |                                                                                      |
|                                                                                                | A2=Placebo                                                                              | 0                                                                                                                                               |                                                                                      |
| Talapotaka Churna                                                                              |                                                                                         |                                                                                                                                                 |                                                                                      |
| Nille 2018                                                                                     | A1=Talapotaka Churna                                                                    | 0                                                                                                                                               |                                                                                      |
|                                                                                                | A2=Talapotaka Churna+OAD                                                                |                                                                                                                                                 |                                                                                      |
|                                                                                                | A3=OAD                                                                                  |                                                                                                                                                 |                                                                                      |
| Trigonella foenum-graecum, Ocimum tenuiflorum                                                  |                                                                                         |                                                                                                                                                 |                                                                                      |
| Mitra 2006                                                                                     | A1=Trigonella foenum-graecum, Ocimum tenuiflorum                                        |                                                                                                                                                 |                                                                                      |
|                                                                                                | A2=No medicine                                                                          |                                                                                                                                                 |                                                                                      |
| Triticum aestivum; Nishamalaki; Triticum aestivum+Nishamalaki                                  |                                                                                         |                                                                                                                                                 |                                                                                      |
| Samagandi 2012                                                                                 | A1=Triticum aestivum                                                                    |                                                                                                                                                 |                                                                                      |
|                                                                                                | A2=Nishamalaki                                                                          |                                                                                                                                                 |                                                                                      |
|                                                                                                | A3=Triticum aestivum+Nishamalaki                                                        |                                                                                                                                                 |                                                                                      |
| Vidangadi Yoga                                                                                 |                                                                                         |                                                                                                                                                 |                                                                                      |
| Deshpande 2018                                                                                 | A1=Vidangadi Yoga                                                                       | A1=4 and A2=7; Fever with chills-2, Upper respiratory tract infection-4, Hypertension-3, Knee joint pain-1, Left foot abscess-1 (all unrelated) |                                                                                      |
|                                                                                                | A2=OAD                                                                                  |                                                                                                                                                 |                                                                                      |
| Vijaysaradi Ghana Vati; Madhumehari Vati                                                       |                                                                                         |                                                                                                                                                 |                                                                                      |
| Sharma 2018                                                                                    | A1=Vijaysaradi Ghana Vati                                                               |                                                                                                                                                 |                                                                                      |
|                                                                                                | A2=Madhumehari Vati                                                                     |                                                                                                                                                 |                                                                                      |

A1, A2, A3, A4, A5=Eligible study arms, OAD=Oral antidiabetic drug, T2DM=Type 2 diabetes mellitus

§Some of the Ayurvedic medicines contain single plant- or mineral-origin ingredient.
