# Supplementary material for: Effectiveness and Safety of Ayurvedic Medicines in Type 2 Diabetes Mellitus Management: A Systematic Review and Meta-Analysis
Source: Frontiers journal article supplement (doi:10.3389/fphar.2022.821810), 2022-06-08
Supplement: Data_Sheet_1.zip [file Data_Sheet_1.zip]

Summary of Findings

Aegle marmelos (L.) Corrêa compared to comparator for T2DM management

**Patient or population:** T2DM management  
**Intervention:** Aegle marmelos  
**Comparison:** comparator (i.e., no medicine, no additional medicine, or placebo)

| Outcomes                | Absolute effect<br>(95% CI)                                                               | Nº of participants<br>(studies) | Certainty of the<br>evidence<br>(GRADE) | Comments |
|-------------------------|-------------------------------------------------------------------------------------------|---------------------------------|-----------------------------------------|----------|
| HbA1c                   | MD 1.6 % lower<br>(3 lower to 0.3 lower)                                                  | 210<br>(2 RCTs)                 | ⊕⊕⊕○<br>MODERATE <sup>a</sup>           |          |
| FBG                     | MD 56 mg/dL lower<br>(104 lower to 9 lower)                                               | 228<br>(3 RCTs)                 | ⊕○○○<br>VERY LOW <sup>a,b,c</sup>       |          |
| HRQoL - not<br>reported | -                                                                                         | -                               | -                                       |          |
| Adverse<br>events       | 1 study reported 0 adverse event. Exact details were not provided in the other 2 studies. | (3 RCTs)                        | ⊕⊕○○<br>LOW <sup>a,d</sup>              |          |

CI: Confidence interval; MD: Mean difference

GRADE Working Group grades of evidence

**High certainty:** We are very confident that the true effect lies close to that of the estimate of the effect

**Moderate certainty:** We are moderately confident in the effect estimate: The true effect is likely to be close to the estimate of the effect, but there is a possibility that it is substantially different

**Low certainty:** Our confidence in the effect estimate is limited: The true effect may be substantially different from the estimate of the effect

**Very low certainty:** We have very little confidence in the effect estimate: The true effect is likely to be substantially different from the estimate of effect

Explanations

- a. Small sample size.
- b. Attrition bias.
- c. Statistical heterogeneity.
- d. Selective outcome reporting.

---

**Allium sativum L. compared to comparator for T2DM management**

---

**Patient or population:** T2DM management**Intervention:** *Allium sativum***Comparison:** comparator (i.e., no medicine, no additional medicine, or placebo)

| Outcomes                | Absolute effect<br>(95% CI)                                                                                                   | № of<br>participants<br>(studies) | Certainty of<br>the evidence<br>(GRADE) | Comments |
|-------------------------|-------------------------------------------------------------------------------------------------------------------------------|-----------------------------------|-----------------------------------------|----------|
| HbA1c                   | MD <b>0.4 % lower</b><br>(0.9 lower to 0.1 higher)                                                                            | 272<br>(3 RCTs)                   | ⊕⊕○○<br>LOW <sup>a,b</sup>              |          |
| FBG                     | MD <b>1 mg/dL lower</b><br>(14 lower to 11 higher)                                                                            | 316<br>(4 RCTs)                   | ⊕○○○<br>VERY LOW <sup>a,b</sup>         |          |
| HRQoL - not<br>reported | -                                                                                                                             | -                                 | -                                       |          |
| Adverse<br>events       | 1 study reported 0 adverse event in the intervention arm. 2 studies reported<br>gastrointestinal tract related adverse event. | (3 RCTs)                          | ⊕⊕○○<br>LOW <sup>b,c</sup>              |          |

**CI:** Confidence interval; **MD:** Mean difference**GRADE Working Group grades of evidence****High certainty:** We are very confident that the true effect lies close to that of the estimate of the effect**Moderate certainty:** We are moderately confident in the effect estimate: The true effect is likely to be close to the estimate of the effect, but there is a possibility that it is substantially different**Low certainty:** Our confidence in the effect estimate is limited: The true effect may be substantially different from the estimate of the effect**Very low certainty:** We have very little confidence in the effect estimate: The true effect is likely to be substantially different from the estimate of effect

---

*Explanations*

a. Statistical heterogeneity.

b. Small sample size.

c. Selective outcome reporting.

---

**Aloe vera L. compared to comparator for T2DM management**

---

**Patient or population:** T2DM management**Intervention:** *Aloe vera***Comparison:** comparator (i.e., no medicine, no additional medicine, or placebo)

| Outcomes                | Absolute effect<br>(95% CI)                                                                                                                                                | Nº of participants<br>(studies) | Certainty of the<br>evidence<br>(GRADE) | Comments |
|-------------------------|----------------------------------------------------------------------------------------------------------------------------------------------------------------------------|---------------------------------|-----------------------------------------|----------|
| HbA1c                   | MD <b>0.9 % lower</b><br>(2.1 lower to 0.3 higher)                                                                                                                         | 137<br>(3 RCTs)                 | ⊕○○○<br>VERY LOW <sup>a,b,c</sup>       |          |
| FBG                     | MD <b>11 mg/dL lower</b><br>(32 lower to 10 higher)                                                                                                                        | 197<br>(4 RCTs)                 | ⊕○○○<br>VERY LOW <sup>a,b,c</sup>       |          |
| HRQoL - not<br>reported | -                                                                                                                                                                          | -                               | -                                       |          |
| Adverse<br>events       | 1 study reported 0 adverse event. The other study reported 0 adverse event in the intervention arm and gastrointestinal tract related adverse event in the comparator arm. | (2 RCTs)                        | ⊕⊕○○<br>LOW <sup>c,d</sup>              |          |

**CI:** Confidence interval; **MD:** Mean difference

---

**GRADE Working Group grades of evidence****High certainty:** We are very confident that the true effect lies close to that of the estimate of the effect**Moderate certainty:** We are moderately confident in the effect estimate: The true effect is likely to be close to the estimate of the effect, but there is a possibility that it is substantially different**Low certainty:** Our confidence in the effect estimate is limited: The true effect may be substantially different from the estimate of the effect**Very low certainty:** We have very little confidence in the effect estimate: The true effect is likely to be substantially different from the estimate of effect

---

*Explanations*

a. Attrition bias.

b. Statistical heterogeneity.

c. Small sample size.

d. Selective outcome reporting.

---

***Anethum graveolens* L. compared to comparator for T2DM management**

---

**Patient or population:** T2DM management**Intervention:** *Anethum graveolens***Comparison:** comparator (i.e., no medicine, no additional medicine, or placebo)

| Outcomes                         | Absolute effect<br>(95% CI)                        | № of participants<br>(studies) | Certainty of the<br>evidence<br>(GRADE) | Comments |
|----------------------------------|----------------------------------------------------|--------------------------------|-----------------------------------------|----------|
| HbA1c - not<br>reported          | -                                                  | -                              | -                                       |          |
| FBG                              | <b>MD 12 mg/dL lower</b><br>(30 lower to 7 higher) | 94<br>(2 RCTs)                 | ⊕○○○<br>VERY LOW <sup>a,b</sup>         |          |
| HRQoL - not<br>reported          | -                                                  | -                              | -                                       |          |
| Adverse events -<br>not reported | -                                                  | -                              | -                                       |          |

**CI:** Confidence interval; **MD:** Mean difference**GRADE Working Group grades of evidence****High certainty:** We are very confident that the true effect lies close to that of the estimate of the effect**Moderate certainty:** We are moderately confident in the effect estimate: The true effect is likely to be close to the estimate of the effect, but there is a possibility that it is substantially different**Low certainty:** Our confidence in the effect estimate is limited: The true effect may be substantially different from the estimate of the effect**Very low certainty:** We have very little confidence in the effect estimate: The true effect is likely to be substantially different from the estimate of effect

---

*Explanations*

a. Attrition bias.

b. Small sample size.

---

**Azadirachta indica A.Juss. compared to comparator for T2DM management**

---

**Patient or population:** T2DM management**Intervention:** *Azadirachta indica***Comparison:** comparator (i.e., no medicine, no additional medicine, or placebo)

| Outcomes                | Absolute effect<br>(95% CI)                                    | N <sub>e</sub> of participants<br>(studies) | Certainty of the<br>evidence<br>(GRADE) | Comments |
|-------------------------|----------------------------------------------------------------|---------------------------------------------|-----------------------------------------|----------|
| HbA1c                   | MD <b>1 % lower</b><br>(1.2 lower to 0.8 lower)                | 78<br>(1 RCT)                               | ⊕○○○<br>VERY LOW <sup>a,b</sup>         |          |
| FBG                     | MD <b>8 mg/dL lower</b><br>(13 lower to 4 lower)               | 118<br>(2 RCTs)                             | ⊕⊕⊕○<br>MODERATE <sup>b</sup>           |          |
| HRQoL - not<br>reported | -                                                              | -                                           | -                                       |          |
| Adverse<br>events       | 1 study reported gastrointestinal tract related adverse event. | (1 RCT)                                     | ⊕○○○<br>VERY LOW <sup>b,c</sup>         |          |

**CI:** Confidence interval; **MD:** Mean difference**GRADE Working Group grades of evidence****High certainty:** We are very confident that the true effect lies close to that of the estimate of the effect**Moderate certainty:** We are moderately confident in the effect estimate: The true effect is likely to be close to the estimate of the effect, but there is a possibility that it is substantially different**Low certainty:** Our confidence in the effect estimate is limited: The true effect may be substantially different from the estimate of the effect**Very low certainty:** We have very little confidence in the effect estimate: The true effect is likely to be substantially different from the estimate of effect

---

*Explanations*

a. Attrition bias.

b. Small sample size.

c. Selective outcome reporting.

---

***Boswellia serrata* Roxb. compared to comparator for T2DM management**

---

**Patient or population:** T2DM management**Intervention:** *Boswellia serrata***Comparison:** comparator (i.e., no medicine, no additional medicine, or placebo)

| Outcomes                | Absolute effect<br>(95% CI)                                                                                           | № of participants<br>(studies) | Certainty of the<br>evidence<br>(GRADE) | Comments |
|-------------------------|-----------------------------------------------------------------------------------------------------------------------|--------------------------------|-----------------------------------------|----------|
| HbA1c                   | MD <b>0.5 % lower</b><br>(0.7 lower to 0.4 lower)                                                                     | 127<br>(2 RCTs)                | ⊕⊕⊕○<br>MODERATE <sup>a</sup>           |          |
| FBG                     | MD <b>24 mg/dL lower</b><br>(28 lower to 21 lower)                                                                    | 127<br>(2 RCTs)                | ⊕⊕⊕○<br>MODERATE <sup>a</sup>           |          |
| HRQoL - not<br>reported | -                                                                                                                     | -                              | -                                       |          |
| Adverse<br>events       | 2 studies reported 0 adverse event (this includes 1 study which reported 0<br>adverse event in the intervention arm). | (2 RCTs)                       | ⊕⊕○○<br>LOW <sup>a,b</sup>              |          |

**CI:** Confidence interval; **MD:** Mean difference**GRADE Working Group grades of evidence****High certainty:** We are very confident that the true effect lies close to that of the estimate of the effect**Moderate certainty:** We are moderately confident in the effect estimate: The true effect is likely to be close to the estimate of the effect, but there is a possibility that it is substantially different**Low certainty:** Our confidence in the effect estimate is limited: The true effect may be substantially different from the estimate of the effect**Very low certainty:** We have very little confidence in the effect estimate: The true effect is likely to be substantially different from the estimate of effect

---

*Explanations*

a. Small sample size.

b. Selective outcome reporting.

## Camellia sinensis (L.) Kuntze compared to comparator for T2DM management

**Patient or population:** T2DM management

**Intervention:** *Camellia sinensis*

**Comparison:** comparator (i.e., no medicine, no additional medicine, or placebo)

| Outcomes                           | Absolute effect<br>(95% CI)                                                                                                                                            | Nº of participants<br>(studies) | Certainty of the<br>evidence<br>(GRADE) | Comments |
|------------------------------------|------------------------------------------------------------------------------------------------------------------------------------------------------------------------|---------------------------------|-----------------------------------------|----------|
| HbA1c                              | MD <b>0.1 % lower</b><br>(0.4 lower to 0.2 higher)                                                                                                                     | 317<br>(6 RCTs)                 | ⊕⊕○○<br>LOW <sup>a,b</sup>              |          |
| FBG                                | MD <b>11 mg/dL lower</b><br>(26 lower to 5 higher)                                                                                                                     | 237<br>(4 RCTs)                 | ⊕⊕○○<br>LOW <sup>a,b</sup>              |          |
| HRQoL -<br>Physical health         | SMD <b>0.01 SD higher</b><br>(0.36 lower to 0.38 higher)                                                                                                               | 108<br>(2 RCTs)                 | ⊕⊕○○<br>LOW <sup>a,b</sup>              |          |
| HRQoL -<br>Psychological           | SMD <b>0.12 SD higher</b><br>(0.25 lower to 0.5 higher)                                                                                                                | 108<br>(2 RCTs)                 | ⊕⊕○○<br>LOW <sup>a,b</sup>              |          |
| HRQoL -<br>Social<br>relationships | SMD <b>0.02 SD higher</b><br>(0.35 lower to 0.39 higher)                                                                                                               | 108<br>(2 RCTs)                 | ⊕⊕○○<br>LOW <sup>a,b</sup>              |          |
| HRQoL -<br>Environment             | SMD <b>0.11 SD lower</b><br>(0.62 lower to 0.41 higher)                                                                                                                | 108<br>(2 RCTs)                 | ⊕⊕○○<br>LOW <sup>a,b</sup>              |          |
| Adverse<br>events                  | 3 studies mainly reported gastrointestinal tract related adverse events and hypoglycemia (this includes 1 study which reported 0 adverse event in the comparator arm). | (3 RCTs)                        | ⊕⊕○○<br>LOW <sup>b,c</sup>              |          |

**CI:** Confidence interval; **MD:** Mean difference; **SMD:** Standardised mean difference

### GRADE Working Group grades of evidence

**High certainty:** We are very confident that the true effect lies close to that of the estimate of the effect

**Moderate certainty:** We are moderately confident in the effect estimate: The true effect is likely to be close to the estimate of the effect, but there is a possibility that it is substantially different

**Low certainty:** Our confidence in the effect estimate is limited: The true effect may be substantially different from the estimate of the effect

**Very low certainty:** We have very little confidence in the effect estimate: The true effect is likely to be substantially different from the estimate of effect

### Explanations

a. Attrition bias.

b. Small sample size.

c. Selective outcome reporting.

---

**Cinnamomum aromaticum** Nees compared to comparator for T2DM management

---

**Patient or population:** T2DM management**Intervention:** *Cinnamomum aromaticum***Comparison:** comparator (i.e., no medicine, no additional medicine, or placebo)

| Outcomes                | Absolute effect<br>(95% CI)                                                                                                                                                                                                                                                                                                                   | N <sub>e</sub> of participants<br>(studies) | Certainty of the<br>evidence<br>(GRADE) | Comments |
|-------------------------|-----------------------------------------------------------------------------------------------------------------------------------------------------------------------------------------------------------------------------------------------------------------------------------------------------------------------------------------------|---------------------------------------------|-----------------------------------------|----------|
| HbA1c                   | MD <b>0.2 % lower</b><br>(0.5 lower to 0.1 higher)                                                                                                                                                                                                                                                                                            | 794<br>(10 RCTs)                            | ⊕⊕⊕○<br>MODERATE <sup>a</sup>           |          |
| FBG                     | MD <b>1 mg/dL higher</b><br>(6 lower to 9 higher)                                                                                                                                                                                                                                                                                             | 692<br>(9 RCTs)                             | ⊕⊕⊕⊕<br>HIGH                            |          |
| HRQoL - not<br>reported | -                                                                                                                                                                                                                                                                                                                                             | -                                           | -                                       |          |
| Adverse<br>events       | 3 studies reported 0 adverse event (this includes 1 study which reported 0 adverse event in the intervention arm). 2 studies reported gastrointestinal tract and skin related adverse events (this includes 1 study which reported 0 adverse event in the intervention arm and 1 study which reported 0 adverse event in the comparator arm). | (5 RCTs)                                    | ⊕⊕⊕○<br>MODERATE <sup>b</sup>           |          |

**CI:** Confidence interval; **MD:** Mean difference**GRADE Working Group grades of evidence****High certainty:** We are very confident that the true effect lies close to that of the estimate of the effect**Moderate certainty:** We are moderately confident in the effect estimate: The true effect is likely to be close to the estimate of the effect, but there is a possibility that it is substantially different**Low certainty:** Our confidence in the effect estimate is limited: The true effect may be substantially different from the estimate of the effect**Very low certainty:** We have very little confidence in the effect estimate: The true effect is likely to be substantially different from the estimate of effect**Explanations**

a. Publication bias detected in the funnel plot.

b. Selective outcome reporting.



---

**Cinnamomum verum J.Presl compared to comparator for T2DM management**

---

**Patient or population:** T2DM management**Intervention:** *Cinnamomum verum***Comparison:** comparator (i.e., no medicine, no additional medicine, or placebo)

| Outcomes                | Absolute effect<br>(95% CI)                                                                                                                                                                                               | N <sub>e</sub> of participants<br>(studies) | Certainty of the<br>evidence<br>(GRADE) | Comments |
|-------------------------|---------------------------------------------------------------------------------------------------------------------------------------------------------------------------------------------------------------------------|---------------------------------------------|-----------------------------------------|----------|
| HbA1c                   | MD <b>0.1 % lower</b><br>(0.5 lower to 0.3 higher)                                                                                                                                                                        | 403<br>(6 RCTs)                             | ⊕⊕○○<br>LOW <sup>a,b</sup>              |          |
| FBG                     | MD <b>11 mg/dL lower</b><br>(19 lower to 3 lower)                                                                                                                                                                         | 403<br>(6 RCTs)                             | ⊕⊕⊕○<br>MODERATE <sup>a</sup>           |          |
| HRQoL - not<br>reported | -                                                                                                                                                                                                                         | -                                           | -                                       |          |
| Adverse<br>events       | 4 studies reported 0 adverse event (this includes 1 study which reported 0<br>adverse event in the intervention arm). 1 study reported an adverse event (this<br>study reported 0 adverse event in the intervention arm). | (5 RCTs)                                    | ⊕⊕○○<br>LOW <sup>c,d</sup>              |          |

**CI:** Confidence interval; **MD:** Mean difference**GRADE Working Group grades of evidence****High certainty:** We are very confident that the true effect lies close to that of the estimate of the effect**Moderate certainty:** We are moderately confident in the effect estimate: The true effect is likely to be close to the estimate of the effect, but there is a possibility that it is substantially different**Low certainty:** Our confidence in the effect estimate is limited: The true effect may be substantially different from the estimate of the effect**Very low certainty:** We have very little confidence in the effect estimate: The true effect is likely to be substantially different from the estimate of effect**Explanations**

a. Attrition bias.

b. Statistical heterogeneity.

c. Selective outcome reporting.

d. Small sample size.

# **Citrullus colocynthis (L.) Schrad. compared to comparator for T2DM management**

**Patient or population:** T2DM management

**Intervention:** *Citrullus colocynthis*

**Comparison:** comparator (i.e., no medicine, no additional medicine, or placebo)

| Outcomes                | Absolute effect<br>(95% CI)                                                                                                         | Nº of participants<br>(studies) | Certainty of the<br>evidence<br>(GRADE) | Comments |
|-------------------------|-------------------------------------------------------------------------------------------------------------------------------------|---------------------------------|-----------------------------------------|----------|
| HbA1c                   | MD <b>0.2 % lower</b><br>(0.7 lower to 0.4 higher)                                                                                  | 120<br>(2 RCTs)                 | ⊕⊕⊕○<br>MODERATE <sup>a</sup>           |          |
| FBG                     | MD <b>3 mg/dL lower</b><br>(18 lower to 12 higher)                                                                                  | 120<br>(2 RCTs)                 | ⊕⊕⊕○<br>MODERATE <sup>a</sup>           |          |
| HRQoL - not<br>reported | -                                                                                                                                   | -                               | -                                       |          |
| Adverse<br>events       | 1 study reported 0 adverse event in the intervention arm. The other study<br>reported gastrointestinal tract related adverse event. | (2 RCTs)                        | ⊕⊕○○<br>LOW <sup>a,b</sup>              |          |

**CI:** Confidence interval; **MD:** Mean difference

## **GRADE Working Group grades of evidence**

**High certainty:** We are very confident that the true effect lies close to that of the estimate of the effect

**Moderate certainty:** We are moderately confident in the effect estimate: The true effect is likely to be close to the estimate of the effect, but there is a possibility that it is substantially different

**Low certainty:** Our confidence in the effect estimate is limited: The true effect may be substantially different from the estimate of the effect

**Very low certainty:** We have very little confidence in the effect estimate: The true effect is likely to be substantially different from the estimate of effect

## *Explanations*

a. Small sample size.

b. Selective outcome reporting.

---

**Coccinia grandis (L.) Voigt compared to comparator for T2DM management**

---

**Patient or population:** T2DM management**Intervention:** *Coccinia grandis***Comparison:** comparator (i.e., no medicine, no additional medicine, or placebo)

| Outcomes                | Absolute effect<br>(95% CI)                                                                                                          | Nº of participants<br>(studies) | Certainty of the<br>evidence<br>(GRADE) | Comments |
|-------------------------|--------------------------------------------------------------------------------------------------------------------------------------|---------------------------------|-----------------------------------------|----------|
| HbA1c                   | MD <b>0.5 % lower</b><br>(1.1 lower to 0)                                                                                            | 217<br>(2 RCTs)                 | ⊕⊕○○<br>LOW <sup>a,b</sup>              |          |
| FBG                     | MD <b>22 mg/dL lower</b><br>(25 lower to 19 lower)                                                                                   | 217<br>(2 RCTs)                 | ⊕⊕⊕○<br>MODERATE <sup>b</sup>           |          |
| HRQoL - not<br>reported | -                                                                                                                                    | -                               | -                                       |          |
| Adverse<br>events       | 1 study reported 0 adverse event. The other study mainly reported<br>gastrointestinal tract related adverse events and hypoglycemia. | (2 RCTs)                        | ⊕⊕○○<br>LOW <sup>b,c</sup>              |          |

**CI:** Confidence interval; **MD:** Mean difference**GRADE Working Group grades of evidence****High certainty:** We are very confident that the true effect lies close to that of the estimate of the effect**Moderate certainty:** We are moderately confident in the effect estimate: The true effect is likely to be close to the estimate of the effect, but there is a possibility that it is substantially different**Low certainty:** Our confidence in the effect estimate is limited: The true effect may be substantially different from the estimate of the effect**Very low certainty:** We have very little confidence in the effect estimate: The true effect is likely to be substantially different from the estimate of effect

---

*Explanations*

a. Statistical heterogeneity.

b. Small sample size.

c. Selective outcome reporting.

---

**Crocus sativus L. compared to comparator for T2DM management**

---

**Patient or population:** T2DM management**Intervention:** *Crocus sativus***Comparison:** comparator (i.e., no medicine, no additional medicine, or placebo)

| Outcomes                | Absolute effect<br>(95% CI)                               | Nº of participants<br>(studies) | Certainty of the<br>evidence<br>(GRADE) | Comments |
|-------------------------|-----------------------------------------------------------|---------------------------------|-----------------------------------------|----------|
| HbA1c                   | MD <b>0.2 % higher</b><br>(0.1 lower to 0.4 higher)       | 277<br>(4 RCTs)                 | ⊕⊕○○<br>LOW <sup>a,b</sup>              |          |
| FBG                     | MD <b>9 mg/dL lower</b><br>(26 lower to 8 higher)         | 334<br>(5 RCTs)                 | ⊕⊕○○<br>LOW <sup>a,b</sup>              |          |
| HRQoL - not<br>reported | -                                                         | -                               | -                                       |          |
| Adverse<br>events       | 1 study reported 0 adverse event in the intervention arm. | (1 RCT)                         | ⊕○○○<br>VERY LOW <sup>b,c</sup>         |          |

**CI:** Confidence interval; **MD:** Mean difference**GRADE Working Group grades of evidence****High certainty:** We are very confident that the true effect lies close to that of the estimate of the effect**Moderate certainty:** We are moderately confident in the effect estimate: The true effect is likely to be close to the estimate of the effect, but there is a possibility that it is substantially different**Low certainty:** Our confidence in the effect estimate is limited: The true effect may be substantially different from the estimate of the effect**Very low certainty:** We have very little confidence in the effect estimate: The true effect is likely to be substantially different from the estimate of effect

---

*Explanations*

a. Attrition bias.

b. Small sample size.

c. Selective outcome reporting.

## Cuminum cyminum L. compared to comparator for T2DM management

**Patient or population:** T2DM management

**Intervention:** *Cuminum cyminum*

**Comparison:** comparator (i.e., no medicine, no additional medicine, or placebo)

| Outcomes             | Absolute effect<br>(95% CI)                               | Nº of participants<br>(studies) | Certainty of the<br>evidence<br>(GRADE) | Comments |
|----------------------|-----------------------------------------------------------|---------------------------------|-----------------------------------------|----------|
| HbA1c                | MD <b>1.5 % lower</b><br>(3.7 lower to 0.7 higher)        | 140<br>(2 RCTs)                 | ⊕○○○<br>VERY LOW <sup>a,b</sup>         |          |
| FBG                  | MD <b>14 mg/dL lower</b><br>(35 lower to 6 higher)        | 290<br>(2 RCTs)                 | ⊕⊕○○<br>LOW <sup>a,b</sup>              |          |
| HRQoL - not reported | -                                                         | -                               | -                                       |          |
| Adverse events       | 1 study reported 0 adverse event in the intervention arm. | (1 RCT)                         | ⊕○○○<br>VERY LOW <sup>b,c</sup>         |          |

**CI:** Confidence interval; **MD:** Mean difference

### GRADE Working Group grades of evidence

**High certainty:** We are very confident that the true effect lies close to that of the estimate of the effect

**Moderate certainty:** We are moderately confident in the effect estimate: The true effect is likely to be close to the estimate of the effect, but there is a possibility that it is substantially different

**Low certainty:** Our confidence in the effect estimate is limited: The true effect may be substantially different from the estimate of the effect

**Very low certainty:** We have very little confidence in the effect estimate: The true effect is likely to be substantially different from the estimate of effect

### Explanations

a. Statistical heterogeneity.

b. Small sample size.

c. Selective outcome reporting.

---

**Curcuma longa L. compared to comparator for T2DM management**

---

**Patient or population:** T2DM management**Intervention:** *Curcuma longa***Comparison:** comparator (i.e., no medicine, no additional medicine, or placebo)

| Outcomes                | Absolute effect<br>(95% CI)                                                                                                                                                                     | Nº of participants<br>(studies) | Certainty of the<br>evidence<br>(GRADE) | Comments |
|-------------------------|-------------------------------------------------------------------------------------------------------------------------------------------------------------------------------------------------|---------------------------------|-----------------------------------------|----------|
| HbA1c                   | MD <b>0.2 % lower</b><br>(0.7 lower to 0.4 higher)                                                                                                                                              | 593<br>(6 RCTs)                 | ⊕⊕○○<br>LOW <sup>a,b</sup>              |          |
| FBG                     | MD <b>10 mg/dL lower</b><br>(15 lower to 5 lower)                                                                                                                                               | 593<br>(6 RCTs)                 | ⊕⊕⊕○<br>MODERATE <sup>a</sup>           |          |
| HRQoL - not<br>reported | -                                                                                                                                                                                               | -                               | -                                       |          |
| Adverse<br>events       | 3 studies reported 0 adverse event (this includes 1 study which reported 0<br>adverse event in the comparator arm). 3 studies mainly reported<br>gastrointestinal tract related adverse events. | (6 RCTs)                        | ⊕⊕⊕○<br>MODERATE <sup>c</sup>           |          |

**CI:** Confidence interval; **MD:** Mean difference**GRADE Working Group grades of evidence****High certainty:** We are very confident that the true effect lies close to that of the estimate of the effect**Moderate certainty:** We are moderately confident in the effect estimate: The true effect is likely to be close to the estimate of the effect, but there is a possibility that it is substantially different**Low certainty:** Our confidence in the effect estimate is limited: The true effect may be substantially different from the estimate of the effect**Very low certainty:** We have very little confidence in the effect estimate: The true effect is likely to be substantially different from the estimate of effect

---

*Explanations*

a. Attrition bias.

b. Statistical heterogeneity.

c. Selective outcome reporting.

---

**Cyamopsis tetragonoloba (L.) Taub. compared to comparator for T2DM management**

---

**Patient or population:** T2DM management**Intervention:** *Cyamopsis tetragonoloba***Comparison:** comparator (i.e., no medicine, no additional medicine, or placebo)

| Outcomes                | Absolute effect<br>(95% CI)                                                                                            | № of participants<br>(studies) | Certainty of the<br>evidence<br>(GRADE) | Comments |
|-------------------------|------------------------------------------------------------------------------------------------------------------------|--------------------------------|-----------------------------------------|----------|
| HbA1c                   | MD 1 % lower<br>(2 lower to 0)                                                                                         | 39<br>(1 RCT)                  | ⊕⊕○○<br>LOW <sup>a</sup>                |          |
| FBG                     | MD 7 mg/dL lower<br>(58 lower to 44 higher)                                                                            | 56<br>(2 RCTs)                 | ⊕○○○<br>VERY LOW <sup>a,b</sup>         |          |
| HRQoL - not<br>reported | -                                                                                                                      | -                              | -                                       |          |
| Adverse<br>events       | 1 study reported gastrointestinal tract related adverse events. Exact details were<br>not provided in the other study. | (2 RCTs)                       | ⊕○○○<br>VERY LOW <sup>a,c</sup>         |          |

**CI:** Confidence interval; **MD:** Mean difference**GRADE Working Group grades of evidence****High certainty:** We are very confident that the true effect lies close to that of the estimate of the effect**Moderate certainty:** We are moderately confident in the effect estimate: The true effect is likely to be close to the estimate of the effect, but there is a possibility that it is substantially different**Low certainty:** Our confidence in the effect estimate is limited: The true effect may be substantially different from the estimate of the effect**Very low certainty:** We have very little confidence in the effect estimate: The true effect is likely to be substantially different from the estimate of effect**Explanations**

a. Small sample size.

b. Statistical heterogeneity.

c. Selective outcome reporting.

---

***Elettaria cardamomum* (L.) Maton compared to comparator for T2DM management**

---

**Patient or population:** T2DM management**Intervention:** *Elettaria cardamomum***Comparison:** comparator (i.e., no medicine, no additional medicine, or placebo)

| Outcomes                | Absolute effect<br>(95% CI)                                                                                                                                    | Nº of participants<br>(studies) | Certainty of the<br>evidence<br>(GRADE) | Comments |
|-------------------------|----------------------------------------------------------------------------------------------------------------------------------------------------------------|---------------------------------|-----------------------------------------|----------|
| HbA1c                   | MD <b>0.2 % higher</b><br>(0.2 lower to 0.5 higher)                                                                                                            | 164<br>(2 RCTs)                 | ⊕⊕⊕○<br>MODERATE <sup>a</sup>           |          |
| FBG                     | MD <b>1 mg/dL higher</b><br>(9 lower to 12 higher)                                                                                                             | 164<br>(2 RCTs)                 | ⊕⊕⊕○<br>MODERATE <sup>a</sup>           |          |
| HRQoL - not<br>reported | -                                                                                                                                                              | -                               | -                                       |          |
| Adverse<br>events       | 1 study reported 0 adverse event in the intervention arm. The other study reported adverse events (this study reported 0 adverse event in the comparator arm). | (2 RCTs)                        | ⊕⊕⊕○<br>MODERATE <sup>a</sup>           |          |

**CI:** Confidence interval; **MD:** Mean difference**GRADE Working Group grades of evidence****High certainty:** We are very confident that the true effect lies close to that of the estimate of the effect**Moderate certainty:** We are moderately confident in the effect estimate: The true effect is likely to be close to the estimate of the effect, but there is a possibility that it is substantially different**Low certainty:** Our confidence in the effect estimate is limited: The true effect may be substantially different from the estimate of the effect**Very low certainty:** We have very little confidence in the effect estimate: The true effect is likely to be substantially different from the estimate of effect

---

*Explanations*

a. Small sample size.



---

**Enicostemma axillare (Lam.) Raynal compared to OAD for T2DM management**

---

**Patient or population:** T2DM management**Intervention:** *Enicostemma axillare***Comparison:** OAD

| Outcomes                | Absolute effect<br>(95% CI)                               | Nº of participants<br>(studies) | Certainty of the<br>evidence<br>(GRADE) | Comments |
|-------------------------|-----------------------------------------------------------|---------------------------------|-----------------------------------------|----------|
| HbA1c                   | MD <b>0.4 % lower</b><br>(1.6 lower to 0.7 higher)        | 32<br>(1 RCT)                   | ⊕○○○<br>VERY LOW <sup>a,b</sup>         |          |
| FBG                     | MD <b>23 mg/dL higher</b><br>(20 lower to 66 higher)      | 101<br>(2 RCTs)                 | ⊕○○○<br>VERY LOW <sup>b,c</sup>         |          |
| HRQoL - not<br>reported | -                                                         | -                               | -                                       |          |
| Adverse<br>events       | 1 study reported 0 adverse event in the intervention arm. | (1 RCT)                         | ⊕○○○<br>VERY LOW <sup>b,d</sup>         |          |

**CI:** Confidence interval; **MD:** Mean difference**GRADE Working Group grades of evidence****High certainty:** We are very confident that the true effect lies close to that of the estimate of the effect**Moderate certainty:** We are moderately confident in the effect estimate: The true effect is likely to be close to the estimate of the effect, but there is a possibility that it is substantially different**Low certainty:** Our confidence in the effect estimate is limited: The true effect may be substantially different from the estimate of the effect**Very low certainty:** We have very little confidence in the effect estimate: The true effect is likely to be substantially different from the estimate of effect**Explanations**

a. Attrition bias.

b. Small sample size.

c. Statistical heterogeneity.

d. Selective outcome reporting.

---

***Gynostemma pentaphyllum* (Thunb.) Makino compared to comparator for T2DM management**

---

**Patient or population:** T2DM management**Intervention:** *Gynostemma pentaphyllum***Comparison:** comparator (i.e., no medicine, no additional medicine, or placebo)

| Outcomes                | Absolute effect<br>(95% CI)                 | Ne of participants<br>(studies) | Certainty of the<br>evidence<br>(GRADE) | Comments |
|-------------------------|---------------------------------------------|---------------------------------|-----------------------------------------|----------|
| HbA1c                   | MD 1 % lower<br>(1.5 lower to 0.6 lower)    | 49<br>(2 RCTs)                  | ⊕⊕○○<br>LOW <sup>a</sup>                |          |
| FBG                     | MD 29 mg/dL lower<br>(43 lower to 15 lower) | 49<br>(2 RCTs)                  | ⊕⊕○○<br>LOW <sup>a</sup>                |          |
| HRQoL - not<br>reported | -                                           | -                               | -                                       |          |
| Adverse<br>events       | 2 studies reported 0 adverse event.         | (2 RCTs)                        | ⊕⊕○○<br>LOW <sup>a</sup>                |          |

**CI:** Confidence interval; **MD:** Mean difference**GRADE Working Group grades of evidence****High certainty:** We are very confident that the true effect lies close to that of the estimate of the effect**Moderate certainty:** We are moderately confident in the effect estimate: The true effect is likely to be close to the estimate of the effect, but there is a possibility that it is substantially different**Low certainty:** Our confidence in the effect estimate is limited: The true effect may be substantially different from the estimate of the effect**Very low certainty:** We have very little confidence in the effect estimate: The true effect is likely to be substantially different from the estimate of effect

---

*Explanations*

a. Small sample size.

---

***Ipomoea batatas* (L.) Lam. compared to comparator for T2DM management**

---

**Patient or population:** T2DM management**Intervention:** *Ipomoea batatas***Comparison:** comparator (i.e., no medicine, no additional medicine, or placebo)

| Outcomes                | Absolute effect<br>(95% CI)                                                                                        | Nº of participants<br>(studies) | Certainty of the<br>evidence<br>(GRADE) | Comments |
|-------------------------|--------------------------------------------------------------------------------------------------------------------|---------------------------------|-----------------------------------------|----------|
| HbA1c                   | MD <b>0.2 % lower</b><br>(0.5 lower to 0.1 higher)                                                                 | 122<br>(2 RCTs)                 | ⊕⊕⊕○<br>MODERATE <sup>a</sup>           |          |
| FBG                     | MD <b>8 mg/dL lower</b><br>(13 lower to 3 lower)                                                                   | 122<br>(2 RCTs)                 | ⊕⊕⊕○<br>MODERATE <sup>a</sup>           |          |
| HRQoL - not<br>reported | -                                                                                                                  | -                               | -                                       |          |
| Adverse<br>events       | Exact details were not provided in 2 studies but mainly reported<br>gastrointestinal tract related adverse events. | (2 RCTs)                        | ⊕⊕○○<br>LOW <sup>a,b</sup>              |          |

**CI:** Confidence interval; **MD:** Mean difference**GRADE Working Group grades of evidence****High certainty:** We are very confident that the true effect lies close to that of the estimate of the effect**Moderate certainty:** We are moderately confident in the effect estimate: The true effect is likely to be close to the estimate of the effect, but there is a possibility that it is substantially different**Low certainty:** Our confidence in the effect estimate is limited: The true effect may be substantially different from the estimate of the effect**Very low certainty:** We have very little confidence in the effect estimate: The true effect is likely to be substantially different from the estimate of effect

---

*Explanations*

a. Small sample size.

b. Selective outcome reporting.

---

**Juglans regia L. compared to comparator for T2DM management**

---

**Patient or population:** T2DM management**Intervention:** *Juglans regia***Comparison:** comparator (i.e., no medicine, no additional medicine, or placebo)

| Outcomes                | Absolute effect<br>(95% CI)                                                                                                                                                                                                                                              | Nº of participants<br>(studies) | Certainty of the<br>evidence<br>(GRADE) | Comments |
|-------------------------|--------------------------------------------------------------------------------------------------------------------------------------------------------------------------------------------------------------------------------------------------------------------------|---------------------------------|-----------------------------------------|----------|
| HbA1c                   | MD <b>0.3 % lower</b><br>(0.6 lower to 0)                                                                                                                                                                                                                                | 285<br>(5 RCTs)                 | ⊕⊕○○<br>LOW <sup>a,b</sup>              |          |
| FBG                     | MD <b>14 mg/dL lower</b><br>(24 lower to 4 lower)                                                                                                                                                                                                                        | 285<br>(5 RCTs)                 | ⊕⊕○○<br>LOW <sup>a,b</sup>              |          |
| HRQoL - not<br>reported | -                                                                                                                                                                                                                                                                        | -                               | -                                       |          |
| Adverse<br>events       | 2 studies reported 0 adverse event (this includes 1 study which reported 0 adverse event in the intervention arm). 2 studies mainly reported gastrointestinal tract related adverse events (this includes 1 study which reported 0 adverse event in the comparator arm). | (4 RCTs)                        | ⊕⊕○○<br>LOW <sup>b,c</sup>              |          |

**CI:** Confidence interval; **MD:** Mean difference**GRADE Working Group grades of evidence****High certainty:** We are very confident that the true effect lies close to that of the estimate of the effect**Moderate certainty:** We are moderately confident in the effect estimate: The true effect is likely to be close to the estimate of the effect, but there is a possibility that it is substantially different**Low certainty:** Our confidence in the effect estimate is limited: The true effect may be substantially different from the estimate of the effect**Very low certainty:** We have very little confidence in the effect estimate: The true effect is likely to be substantially different from the estimate of effect**Explanations**

a. Attrition bias.

b. Small sample size.

c. Selective outcome reporting.

---

**Momordica charantia L. compared to comparator for T2DM management**

---

**Patient or population:** T2DM management**Intervention:** *Momordica charantia***Comparison:** comparator (i.e., no medicine, no additional medicine, or placebo)

| Outcomes                | Absolute effect<br>(95% CI)                                                                                                                                                             | Nº of participants<br>(studies) | Certainty of the<br>evidence<br>(GRADE) | Comments |
|-------------------------|-----------------------------------------------------------------------------------------------------------------------------------------------------------------------------------------|---------------------------------|-----------------------------------------|----------|
| HbA1c                   | MD <b>0.3 % lower</b><br>(0.4 lower to 0.1 lower)                                                                                                                                       | 404<br>(7 RCTs)                 | ⊕⊕⊕○<br>MODERATE <sup>a</sup>           |          |
| FBG                     | MD <b>14 mg/dL lower</b><br>(23 lower to 4 lower)                                                                                                                                       | 360<br>(7 RCTs)                 | ⊕⊕○○<br>LOW <sup>a,b</sup>              |          |
| HRQoL - not<br>reported | -                                                                                                                                                                                       | -                               | -                                       |          |
| Adverse<br>events       | 1 study reported 0 adverse event. 5 studies mainly reported gastrointestinal tract related adverse events (this includes 1 study which reported 0 adverse event in the comparator arm). | (6 RCTs)                        | ⊕⊕○○<br>LOW <sup>b,c</sup>              |          |

**CI:** Confidence interval; **MD:** Mean difference**GRADE Working Group grades of evidence****High certainty:** We are very confident that the true effect lies close to that of the estimate of the effect**Moderate certainty:** We are moderately confident in the effect estimate: The true effect is likely to be close to the estimate of the effect, but there is a possibility that it is substantially different**Low certainty:** Our confidence in the effect estimate is limited: The true effect may be substantially different from the estimate of the effect**Very low certainty:** We have very little confidence in the effect estimate: The true effect is likely to be substantially different from the estimate of effect

---

*Explanations*

a. Attrition bias.

b. Small sample size.

c. Selective outcome reporting.

---

**Momordica charantia L. compared to OAD for T2DM management**

---

**Patient or population:** T2DM management**Intervention:** *Momordica charantia***Comparison:** OAD

| Outcomes                | Absolute effect<br>(95% CI)                                                                                                   | Nº of participants<br>(studies) | Certainty of the<br>evidence<br>(GRADE) | Comments |
|-------------------------|-------------------------------------------------------------------------------------------------------------------------------|---------------------------------|-----------------------------------------|----------|
| HbA1c                   | MD <b>0.4 % higher</b><br>(0.2 higher to 0.7 higher)                                                                          | 201<br>(2 RCTs)                 | ⊕⊕○○<br>LOW <sup>a,b</sup>              |          |
| FBG                     | MD <b>14 mg/dL higher</b><br>(9 higher to 19 higher)                                                                          | 198<br>(2 RCTs)                 | ⊕⊕○○<br>LOW <sup>a,b</sup>              |          |
| HRQoL - not<br>reported | -                                                                                                                             | -                               | -                                       |          |
| Adverse<br>events       | 1 study mainly reported gastrointestinal tract related adverse events. Exact<br>details were not provided in the other study. | (2 RCTs)                        | ⊕⊕○○<br>LOW <sup>b,c</sup>              |          |

**CI:** Confidence interval; **MD:** Mean difference**GRADE Working Group grades of evidence****High certainty:** We are very confident that the true effect lies close to that of the estimate of the effect**Moderate certainty:** We are moderately confident in the effect estimate: The true effect is likely to be close to the estimate of the effect, but there is a possibility that it is substantially different**Low certainty:** Our confidence in the effect estimate is limited: The true effect may be substantially different from the estimate of the effect**Very low certainty:** We have very little confidence in the effect estimate: The true effect is likely to be substantially different from the estimate of effect**Explanations**

a. Attrition bias.

b. Small sample size.

c. Selective outcome reporting.

---

***Nigella sativa* L. compared to comparator for T2DM management**

---

**Patient or population:** T2DM management**Intervention:** *Nigella sativa***Comparison:** comparator (i.e., no medicine, no additional medicine, or placebo)

| Outcomes                | Absolute effect<br>(95% CI)                                                                                                                                                                                                                                                                                              | Nº of participants<br>(studies) | Certainty of the<br>evidence<br>(GRADE) | Comments |
|-------------------------|--------------------------------------------------------------------------------------------------------------------------------------------------------------------------------------------------------------------------------------------------------------------------------------------------------------------------|---------------------------------|-----------------------------------------|----------|
| HbA1c                   | MD <b>0.4 % lower</b><br>(0.6 lower to 0.1 lower)                                                                                                                                                                                                                                                                        | 325<br>(4 RCTs)                 | ⊕⊕⊕○<br>MODERATE <sup>a</sup>           |          |
| FBG                     | MD <b>15 mg/dL lower</b><br>(30 lower to 0)                                                                                                                                                                                                                                                                              | 458<br>(7 RCTs)                 | ⊕⊕⊕○<br>MODERATE <sup>b</sup>           |          |
| HRQoL - not<br>reported | -                                                                                                                                                                                                                                                                                                                        | -                               | -                                       |          |
| Adverse<br>events       | 3 studies reported 0 adverse event (this includes 1 study which reported 0 adverse event in the intervention arm). 2 studies reported gastrointestinal tract related adverse events (this includes 1 study which reported 0 adverse event in the comparator arm and exact details were not provided in the other study). | (5 RCTs)                        | ⊕⊕○○<br>LOW <sup>a,c</sup>              |          |

**CI:** Confidence interval; **MD:** Mean difference**GRADE Working Group grades of evidence****High certainty:** We are very confident that the true effect lies close to that of the estimate of the effect**Moderate certainty:** We are moderately confident in the effect estimate: The true effect is likely to be close to the estimate of the effect, but there is a possibility that it is substantially different**Low certainty:** Our confidence in the effect estimate is limited: The true effect may be substantially different from the estimate of the effect**Very low certainty:** We have very little confidence in the effect estimate: The true effect is likely to be substantially different from the estimate of effect**Explanations**

a. Small sample size.

b. Statistical heterogeneity.

c. Selective outcome reporting.

---

***Plantago ovata* Forssk. compared to comparator for T2DM management**

---

**Patient or population:** T2DM management**Intervention:** *Plantago ovata***Comparison:** comparator (i.e., no medicine, no additional medicine, or placebo)

| Outcomes                | Absolute effect<br>(95% CI)                                                                                                                              | Nº of participants<br>(studies) | Certainty of the<br>evidence<br>(GRADE) | Comments |
|-------------------------|----------------------------------------------------------------------------------------------------------------------------------------------------------|---------------------------------|-----------------------------------------|----------|
| HbA1c                   | MD <b>0.9 % lower</b><br>(1.4 lower to 0.3 lower)                                                                                                        | 106<br>(3 RCTs)                 | ⊕⊕○○<br>LOW <sup>a,b</sup>              |          |
| FBG                     | MD <b>32 mg/dL lower</b><br>(40 lower to 23 lower)                                                                                                       | 106<br>(3 RCTs)                 | ⊕⊕○○<br>LOW <sup>a,b</sup>              |          |
| HRQoL - not<br>reported | -                                                                                                                                                        | -                               | -                                       |          |
| Adverse<br>events       | 1 study mainly reported gastrointestinal tract related adverse events. Exact details were not provided in the other study but hypoglycemia was reported. | (2 RCTs)                        | ⊕○○○<br>VERY LOW <sup>b,c</sup>         |          |

**CI:** Confidence interval; **MD:** Mean difference

---

**GRADE Working Group grades of evidence****High certainty:** We are very confident that the true effect lies close to that of the estimate of the effect**Moderate certainty:** We are moderately confident in the effect estimate: The true effect is likely to be close to the estimate of the effect, but there is a possibility that it is substantially different**Low certainty:** Our confidence in the effect estimate is limited: The true effect may be substantially different from the estimate of the effect**Very low certainty:** We have very little confidence in the effect estimate: The true effect is likely to be substantially different from the estimate of effect

---

**Explanations**

a. Attrition bias.

b. Small sample size.

c. Selective outcome reporting.



---

**Portulaca oleracea L. compared to comparator for T2DM management**

---

**Patient or population:** T2DM management**Intervention:** *Portulaca oleracea***Comparison:** comparator (i.e., no medicine, no additional medicine, or placebo)

| Outcomes                | Absolute effect<br>(95% CI)                         | Nº of participants<br>(studies) | Certainty of the<br>evidence<br>(GRADE) | Comments |
|-------------------------|-----------------------------------------------------|---------------------------------|-----------------------------------------|----------|
| HbA1c                   | MD <b>0.5 % higher</b><br>(0 to 1 higher)           | 63<br>(1 RCT)                   | ⊕⊕○○<br>LOW <sup>a</sup>                |          |
| FBG                     | MD <b>10 mg/dL lower</b><br>(34 lower to 14 higher) | 123<br>(3 RCTs)                 | ⊕⊕⊕○<br>MODERATE <sup>a</sup>           |          |
| HRQoL - not<br>reported | -                                                   | -                               | -                                       |          |
| Adverse<br>events       | 1 study reported adverse events.                    | (1 RCT)                         | ⊕○○○<br>VERY LOW <sup>a,b</sup>         |          |

**CI:** Confidence interval; **MD:** Mean difference**GRADE Working Group grades of evidence****High certainty:** We are very confident that the true effect lies close to that of the estimate of the effect**Moderate certainty:** We are moderately confident in the effect estimate: The true effect is likely to be close to the estimate of the effect, but there is a possibility that it is substantially different**Low certainty:** Our confidence in the effect estimate is limited: The true effect may be substantially different from the estimate of the effect**Very low certainty:** We have very little confidence in the effect estimate: The true effect is likely to be substantially different from the estimate of effect**Explanations**

a. Small sample size.

b. Selective outcome reporting.

---

***Pterocarpus marsupium* Roxb. compared to OAD for T2DM management**

---

**Patient or population:** T2DM management**Intervention:** *Pterocarpus marsupium***Comparison:** OAD

| Outcomes                | Absolute effect<br>(95% CI)                                                                                                         | Nº of participants<br>(studies) | Certainty of the<br>evidence<br>(GRADE) | Comments |
|-------------------------|-------------------------------------------------------------------------------------------------------------------------------------|---------------------------------|-----------------------------------------|----------|
| HbA1c                   | MD <b>0.2 % higher</b><br>(0.2 lower to 0.6 higher)                                                                                 | 90<br>(1 RCT)                   | ⊕○○○<br>VERY LOW <sup>a,b</sup>         |          |
| FBG                     | MD <b>16 mg/dL higher</b><br>(7 lower to 39 higher)                                                                                 | 409<br>(2 RCTs)                 | ⊕⊕○○<br>LOW <sup>a,c</sup>              |          |
| HRQoL - not<br>reported | -                                                                                                                                   | -                               | -                                       |          |
| Adverse<br>events       | 1 study reported 0 adverse event in the intervention arm. The other study<br>reported gastrointestinal tract related adverse event. | (2 RCTs)                        | ⊕⊕⊕○<br>MODERATE <sup>d</sup>           |          |

**CI:** Confidence interval; **MD:** Mean difference**GRADE Working Group grades of evidence****High certainty:** We are very confident that the true effect lies close to that of the estimate of the effect**Moderate certainty:** We are moderately confident in the effect estimate: The true effect is likely to be close to the estimate of the effect, but there is a possibility that it is substantially different**Low certainty:** Our confidence in the effect estimate is limited: The true effect may be substantially different from the estimate of the effect**Very low certainty:** We have very little confidence in the effect estimate: The true effect is likely to be substantially different from the estimate of effect**Explanations**

a. Attrition bias.

b. Small sample size.

c. Statistical heterogeneity.

d. Selective outcome reporting.

---

***Punica granatum* L. compared to comparator for T2DM management**

---

**Patient or population:** T2DM management**Intervention:** *Punica granatum***Comparison:** comparator (i.e., no medicine, no additional medicine, or placebo)

| Outcomes                | Absolute effect<br>(95% CI)                                                                                                                                                               | Nº of participants<br>(studies) | Certainty of the<br>evidence<br>(GRADE) | Comments |
|-------------------------|-------------------------------------------------------------------------------------------------------------------------------------------------------------------------------------------|---------------------------------|-----------------------------------------|----------|
| HbA1c                   | MD <b>0.1 % lower</b><br>(0.5 lower to 0.4 higher)                                                                                                                                        | 312<br>(6 RCTs)                 | ⊕⊕○○<br>LOW <sup>a,b</sup>              |          |
| FBG                     | MD <b>8 mg/dL lower</b><br>(16 lower to 1 higher)                                                                                                                                         | 312<br>(6 RCTs)                 | ⊕⊕○○<br>LOW <sup>a,b</sup>              |          |
| HRQoL - not<br>reported | -                                                                                                                                                                                         | -                               | -                                       |          |
| Adverse events          | 2 studies reported 0 adverse event (this includes 1 study which reported 0 adverse event in the intervention arm). 1 study mainly reported gastrointestinal tract related adverse events. | (3 RCTs)                        | ⊕⊕○○<br>LOW <sup>b,c</sup>              |          |

**CI:** Confidence interval; **MD:** Mean difference**GRADE Working Group grades of evidence****High certainty:** We are very confident that the true effect lies close to that of the estimate of the effect**Moderate certainty:** We are moderately confident in the effect estimate: The true effect is likely to be close to the estimate of the effect, but there is a possibility that it is substantially different**Low certainty:** Our confidence in the effect estimate is limited: The true effect may be substantially different from the estimate of the effect**Very low certainty:** We have very little confidence in the effect estimate: The true effect is likely to be substantially different from the estimate of effect

---

*Explanations*

a. Attrition bias.

b. Small sample size.

c. Selective outcome reporting.

---

**Sesamum indicum L. compared to comparator for T2DM management**

---

**Patient or population:** T2DM management**Intervention:** *Sesamum indicum***Comparison:** comparator (i.e., no medicine, no additional medicine, or placebo)

| Outcomes                         | Absolute effect<br>(95% CI)                          | Nº of participants<br>(studies) | Certainty of the<br>evidence<br>(GRADE) | Comments |
|----------------------------------|------------------------------------------------------|---------------------------------|-----------------------------------------|----------|
| HbA1c                            | MD <b>0.7 % lower</b><br>(1.4 lower to 0)            | 90<br>(2 RCTs)                  | ⊕○○○<br>VERY LOW <sup>a,b</sup>         |          |
| FBG                              | MD <b>46 mg/dL lower</b><br>(116 lower to 25 higher) | 90<br>(2 RCTs)                  | ⊕○○○<br>VERY LOW <sup>a,b,c</sup>       |          |
| HRQoL - not<br>reported          | -                                                    | -                               | -                                       |          |
| Adverse events -<br>not reported | -                                                    | -                               | -                                       |          |

**CI:** Confidence interval; **MD:** Mean difference**GRADE Working Group grades of evidence****High certainty:** We are very confident that the true effect lies close to that of the estimate of the effect**Moderate certainty:** We are moderately confident in the effect estimate: The true effect is likely to be close to the estimate of the effect, but there is a possibility that it is substantially different**Low certainty:** Our confidence in the effect estimate is limited: The true effect may be substantially different from the estimate of the effect**Very low certainty:** We have very little confidence in the effect estimate: The true effect is likely to be substantially different from the estimate of effect

---

*Explanations*

a. Attrition bias.

b. Small sample size.

c. Statistical heterogeneity.

---

**Shilajit compared to comparator for T2DM management**

---

**Patient or population:** T2DM management**Intervention:** Shilajit**Comparison:** comparator (i.e., no medicine, no additional medicine, or placebo)

| Outcomes                | Absolute effect<br>(95% CI)                        | Nº of participants<br>(studies) | Certainty of the<br>evidence<br>(GRADE) | Comments |
|-------------------------|----------------------------------------------------|---------------------------------|-----------------------------------------|----------|
| HbA1c                   | MD <b>0.3 % lower</b><br>(0.7 lower to 0.2 higher) | 132<br>(2 RCTs)                 | ⊕⊕○○<br>LOW <sup>a,b</sup>              |          |
| FBG                     | MD <b>4 mg/dL lower</b><br>(18 lower to 9 higher)  | 92<br>(1 RCT)                   | ⊕○○○<br>VERY LOW <sup>b,c</sup>         |          |
| HRQoL - not<br>reported | -                                                  | -                               | -                                       |          |
| Adverse<br>events       | 1 study reported adverse events.                   | (1 RCT)                         | ⊕○○○<br>VERY LOW <sup>b,d</sup>         |          |

**CI:** Confidence interval; **MD:** Mean difference

---

**GRADE Working Group grades of evidence****High certainty:** We are very confident that the true effect lies close to that of the estimate of the effect**Moderate certainty:** We are moderately confident in the effect estimate: The true effect is likely to be close to the estimate of the effect, but there is a possibility that it is substantially different**Low certainty:** Our confidence in the effect estimate is limited: The true effect may be substantially different from the estimate of the effect**Very low certainty:** We have very little confidence in the effect estimate: The true effect is likely to be substantially different from the estimate of effect

---

*Explanations*

a. Statistical heterogeneity.

b. Small sample size.

c. Attrition bias.

d. Selective outcome reporting.

---

**Syzygium cumini (L.) Skeels compared to comparator for T2DM management**

---

**Patient or population:** T2DM management**Intervention:** *Syzygium cumini***Comparison:** comparator (i.e., no medicine, no additional medicine, or placebo)

| Outcomes                         | Absolute effect<br>(95% CI)                        | Nº of participants<br>(studies) | Certainty of the<br>evidence<br>(GRADE) | Comments |
|----------------------------------|----------------------------------------------------|---------------------------------|-----------------------------------------|----------|
| HbA1c                            | MD <b>0.1 % lower</b><br>(1.5 lower to 1.3 higher) | 124<br>(2 RCTs)                 | ⊕⊕○○<br>LOW <sup>a,b</sup>              |          |
| FBG                              | MD <b>5 mg/dL lower</b><br>(40 lower to 29 higher) | 124<br>(2 RCTs)                 | ⊕○○○<br>VERY LOW <sup>a,b</sup>         |          |
| HRQoL - not<br>reported          | -                                                  | -                               | -                                       |          |
| Adverse events -<br>not reported | -                                                  | -                               | -                                       |          |

**CI:** Confidence interval; **MD:** Mean difference**GRADE Working Group grades of evidence****High certainty:** We are very confident that the true effect lies close to that of the estimate of the effect**Moderate certainty:** We are moderately confident in the effect estimate: The true effect is likely to be close to the estimate of the effect, but there is a possibility that it is substantially different**Low certainty:** Our confidence in the effect estimate is limited: The true effect may be substantially different from the estimate of the effect**Very low certainty:** We have very little confidence in the effect estimate: The true effect is likely to be substantially different from the estimate of effect

---

*Explanations*

a. Statistical heterogeneity.

b. Small sample size.

## *Tinospora cordifolia* (Willd.) Hook.f. & Thomson compared to comparator for T2DM management

**Patient or population:** T2DM management

**Intervention:** *Tinospora cordifolia*

**Comparison:** comparator (i.e., no medicine, no additional medicine, or placebo)

| Outcomes                | Absolute effect<br>(95% CI)                                                                                           | Nº of participants<br>(studies) | Certainty of the<br>evidence<br>(GRADE) | Comments |
|-------------------------|-----------------------------------------------------------------------------------------------------------------------|---------------------------------|-----------------------------------------|----------|
| HbA1c                   | MD <b>0.5 % lower</b><br>(0.6 lower to 0.5 lower)                                                                     | 159<br>(2 RCTs)                 | ⊕⊕⊕○<br>MODERATE <sup>a</sup>           |          |
| FBG                     | MD <b>4 mg/dL lower</b><br>(6 lower to 3 lower)                                                                       | 140<br>(2 RCTs)                 | ⊕⊕⊕○<br>MODERATE <sup>a</sup>           |          |
| HRQoL - not<br>reported | -                                                                                                                     | -                               | -                                       |          |
| Adverse<br>events       | 2 studies reported 0 adverse event (this includes 1 study which reported 0<br>adverse event in the intervention arm). | (2 RCTs)                        | ⊕⊕⊕○<br>MODERATE <sup>a</sup>           |          |

**CI:** Confidence interval; **MD:** Mean difference

### GRADE Working Group grades of evidence

**High certainty:** We are very confident that the true effect lies close to that of the estimate of the effect

**Moderate certainty:** We are moderately confident in the effect estimate: The true effect is likely to be close to the estimate of the effect, but there is a possibility that it is substantially different

**Low certainty:** Our confidence in the effect estimate is limited: The true effect may be substantially different from the estimate of the effect

**Very low certainty:** We have very little confidence in the effect estimate: The true effect is likely to be substantially different from the estimate of effect

### Explanations

a. Small sample size.

## Trigonella foenum-graecum L. compared to comparator for T2DM management

**Patient or population:** T2DM management

**Intervention:** *Trigonella foenum-graecum*

**Comparison:** comparator (i.e., no medicine, no additional medicine, or placebo)

| Outcomes             | Absolute effect<br>(95% CI)                                                                                                                                                                                                                                                                                                                                                | Nº of participants<br>(studies) | Certainty of the<br>evidence<br>(GRADE) | Comments |
|----------------------|----------------------------------------------------------------------------------------------------------------------------------------------------------------------------------------------------------------------------------------------------------------------------------------------------------------------------------------------------------------------------|---------------------------------|-----------------------------------------|----------|
| HbA1c                | MD <b>0.6 % lower</b><br>(0.9 lower to 0.4 lower)                                                                                                                                                                                                                                                                                                                          | 1095<br>(12 RCTs)               | ⊕⊕⊕○<br>MODERATE <sup>a</sup>           |          |
| FBG                  | MD <b>14 mg/dL lower</b><br>(22 lower to 5 lower)                                                                                                                                                                                                                                                                                                                          | 1069<br>(13 RCTs)               | ⊕⊕⊕○<br>MODERATE <sup>a,b</sup>         |          |
| HRQoL - not reported | -                                                                                                                                                                                                                                                                                                                                                                          | -                               | -                                       |          |
| Adverse events       | 5 studies reported 0 adverse event (this includes 2 studies which reported 0 adverse event in the intervention arm). 5 studies reported different body systems related adverse events but mainly gastrointestinal tract related and hypoglycemia (this includes 1 study which reported 0 adverse event in the comparator arm). Exact details were not provided in 1 study. | (11 RCTs)                       | ⊕⊕⊕○<br>MODERATE <sup>c</sup>           |          |

**CI:** Confidence interval; **MD:** Mean difference

### GRADE Working Group grades of evidence

**High certainty:** We are very confident that the true effect lies close to that of the estimate of the effect

**Moderate certainty:** We are moderately confident in the effect estimate: The true effect is likely to be close to the estimate of the effect, but there is a possibility that it is substantially different

**Low certainty:** Our confidence in the effect estimate is limited: The true effect may be substantially different from the estimate of the effect

**Very low certainty:** We have very little confidence in the effect estimate: The true effect is likely to be substantially different from the estimate of effect

### Explanations

a. Publication bias.

b. Statistical heterogeneity.

c. Selective outcome reporting.



---

**Trigonella foenum-graecum L. compared to OAD for T2DM management**

---

**Patient or population:** T2DM management**Intervention:** *Trigonella foenum-graecum***Comparison:** OAD

| Outcomes                | Absolute effect<br>(95% CI)                                                                                                                                            | Nº of participants<br>(studies) | Certainty of the<br>evidence<br>(GRADE) | Comments |
|-------------------------|------------------------------------------------------------------------------------------------------------------------------------------------------------------------|---------------------------------|-----------------------------------------|----------|
| HbA1c                   | MD <b>0.3 % higher</b><br>(1 lower to 1.6 higher)                                                                                                                      | 49<br>(2 RCTs)                  | ⊕○○○<br>VERY LOW <sup>a,b</sup>         |          |
| FBG                     | MD <b>27 mg/dL higher</b><br>(24 lower to 79 higher)                                                                                                                   | 49<br>(2 RCTs)                  | ⊕○○○<br>VERY LOW <sup>a,b</sup>         |          |
| HRQoL - not<br>reported | -                                                                                                                                                                      | -                               | -                                       |          |
| Adverse<br>events       | 2 studies mainly reported gastrointestinal tract related adverse events and hypoglycemia (this includes 1 study which reported 0 adverse event in the comparator arm). | (2 RCTs)                        | ⊕⊕○○<br>LOW <sup>b</sup>                |          |

**CI:** Confidence interval; **MD:** Mean difference**GRADE Working Group grades of evidence****High certainty:** We are very confident that the true effect lies close to that of the estimate of the effect**Moderate certainty:** We are moderately confident in the effect estimate: The true effect is likely to be close to the estimate of the effect, but there is a possibility that it is substantially different**Low certainty:** Our confidence in the effect estimate is limited: The true effect may be substantially different from the estimate of the effect**Very low certainty:** We have very little confidence in the effect estimate: The true effect is likely to be substantially different from the estimate of effect

---

*Explanations*

a. Lack of blinding.

b. Small sample size.

---

***Urtica dioica* L. compared to comparator for T2DM management**

---

**Patient or population:** T2DM management**Intervention:** *Urtica dioica***Comparison:** comparator (i.e., no medicine, no additional medicine, or placebo)

| Outcomes                | Absolute effect<br>(95% CI)                                                                                                                           | Nº of participants<br>(studies) | Certainty of the<br>evidence<br>(GRADE) | Comments |
|-------------------------|-------------------------------------------------------------------------------------------------------------------------------------------------------|---------------------------------|-----------------------------------------|----------|
| HbA1c                   | MD <b>1.3 % lower</b><br>(2.4 lower to 0.2 lower)                                                                                                     | 181<br>(3 RCTs)                 | ⊕○○○<br>VERY LOW <sup>a,b,c</sup>       |          |
| FBG                     | MD <b>20 mg/dL lower</b><br>(41 lower to 1 higher)                                                                                                    | 376<br>(8 RCTs)                 | ⊕○○○<br>VERY LOW <sup>a,b,c</sup>       |          |
| HRQoL - not<br>reported | -                                                                                                                                                     | -                               | -                                       |          |
| Adverse<br>events       | 1 study reported 0 adverse event. The other study reported skin related<br>adverse event (this study reported 0 adverse event in the comparator arm). | (2 RCTs)                        | ⊕⊕○○<br>LOW <sup>c,d</sup>              |          |

**CI:** Confidence interval; **MD:** Mean difference

---

**GRADE Working Group grades of evidence****High certainty:** We are very confident that the true effect lies close to that of the estimate of the effect**Moderate certainty:** We are moderately confident in the effect estimate: The true effect is likely to be close to the estimate of the effect, but there is a possibility that it is substantially different**Low certainty:** Our confidence in the effect estimate is limited: The true effect may be substantially different from the estimate of the effect**Very low certainty:** We have very little confidence in the effect estimate: The true effect is likely to be substantially different from the estimate of effect

---

*Explanations*

a. Attrition bias.

b. Statistical heterogeneity.

c. Small sample size.

d. Selective outcome reporting.

---

**Zingiber officinale Roscoe compared to comparator for T2DM management**

---

**Patient or population:** T2DM management**Intervention:** *Zingiber officinale***Comparison:** comparator (i.e., no medicine, no additional medicine, or placebo)

| Outcomes                | Absolute effect<br>(95% CI)                                                                                                                                                            | N <sub>e</sub> of participants<br>(studies) | Certainty of the<br>evidence<br>(GRADE) | Comments |
|-------------------------|----------------------------------------------------------------------------------------------------------------------------------------------------------------------------------------|---------------------------------------------|-----------------------------------------|----------|
| HbA1c                   | MD <b>0.3 % lower</b><br>(0.6 lower to 0.1 higher)                                                                                                                                     | 561<br>(9 RCTs)                             | ⊕⊕⊕○<br>MODERATE <sup>a</sup>           |          |
| FBG                     | MD <b>8 mg/dL lower</b><br>(17 lower to 1 higher)                                                                                                                                      | 517<br>(8 RCTs)                             | ⊕⊕⊕○<br>MODERATE <sup>a</sup>           |          |
| HRQoL - not<br>reported | -                                                                                                                                                                                      | -                                           | -                                       |          |
| Adverse events          | 3 studies reported 0 adverse event (this includes 2 studies which reported 0 adverse event in the intervention arm). 2 studies reported gastrointestinal tract related adverse events. | (5 RCTs)                                    | ⊕⊕⊕○<br>MODERATE <sup>b</sup>           |          |

**CI:** Confidence interval; **MD:** Mean difference**GRADE Working Group grades of evidence****High certainty:** We are very confident that the true effect lies close to that of the estimate of the effect**Moderate certainty:** We are moderately confident in the effect estimate: The true effect is likely to be close to the estimate of the effect, but there is a possibility that it is substantially different**Low certainty:** Our confidence in the effect estimate is limited: The true effect may be substantially different from the estimate of the effect**Very low certainty:** We have very little confidence in the effect estimate: The true effect is likely to be substantially different from the estimate of effect

---

*Explanations*

a. Attrition bias.

b. Selective outcome reporting.
