# Supplementary figures and images for: Effectiveness and Safety of Ayurvedic Medicines in Type 2 Diabetes Mellitus Management: A Systematic Review and Meta-Analysis (part 1 of 4)
Source: Frontiers journal article supplement (doi:10.3389/fphar.2022.821810), 2022-06-08

# Gynostemma pentaphyllum - FBG

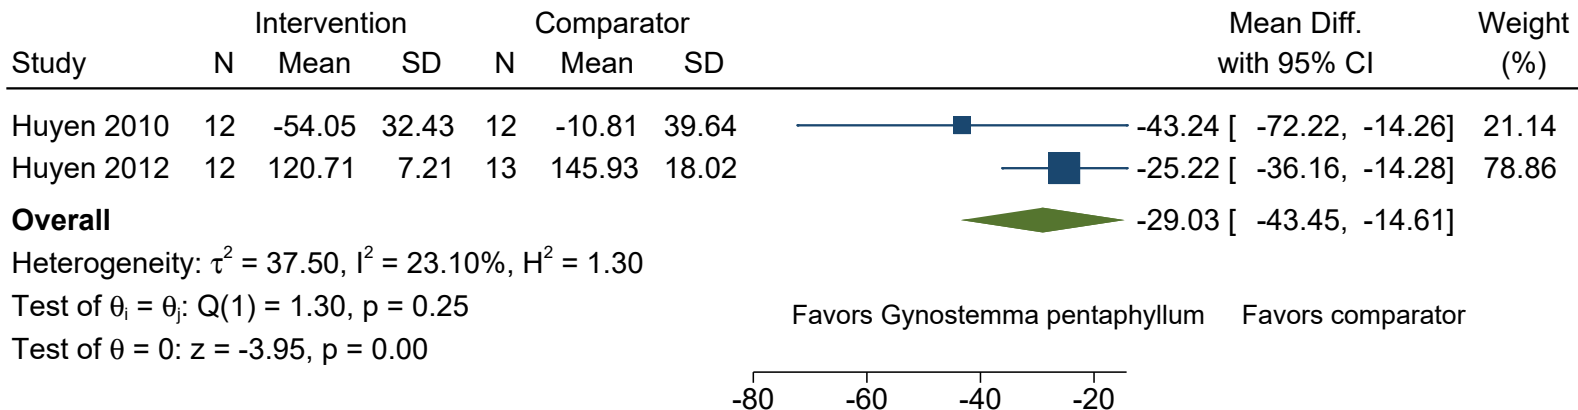

Random-effects REML model

Supplement: Data_Sheet_1.zip [file Data_Sheet_1.zip]

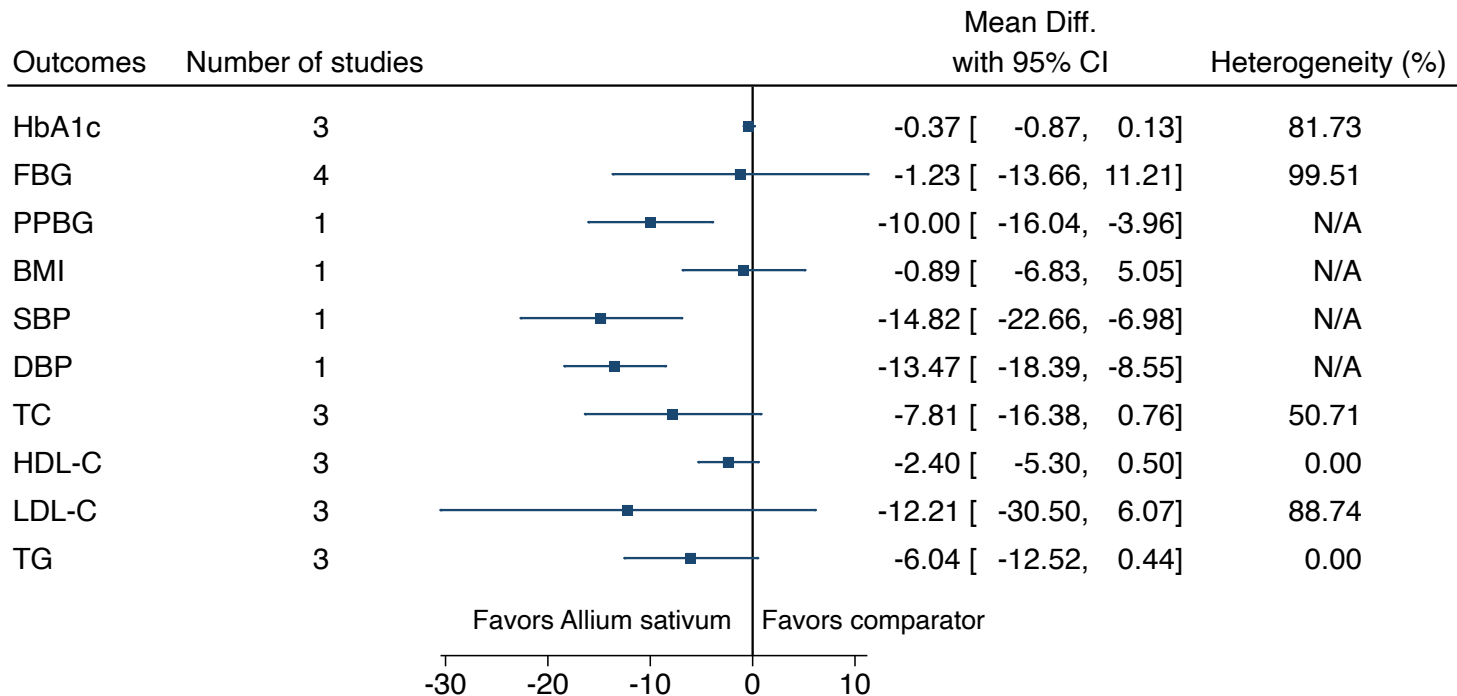

Supplement: Data_Sheet_1.zip [file Data_Sheet_1.zip]

# Tinospora cordifolia - TG

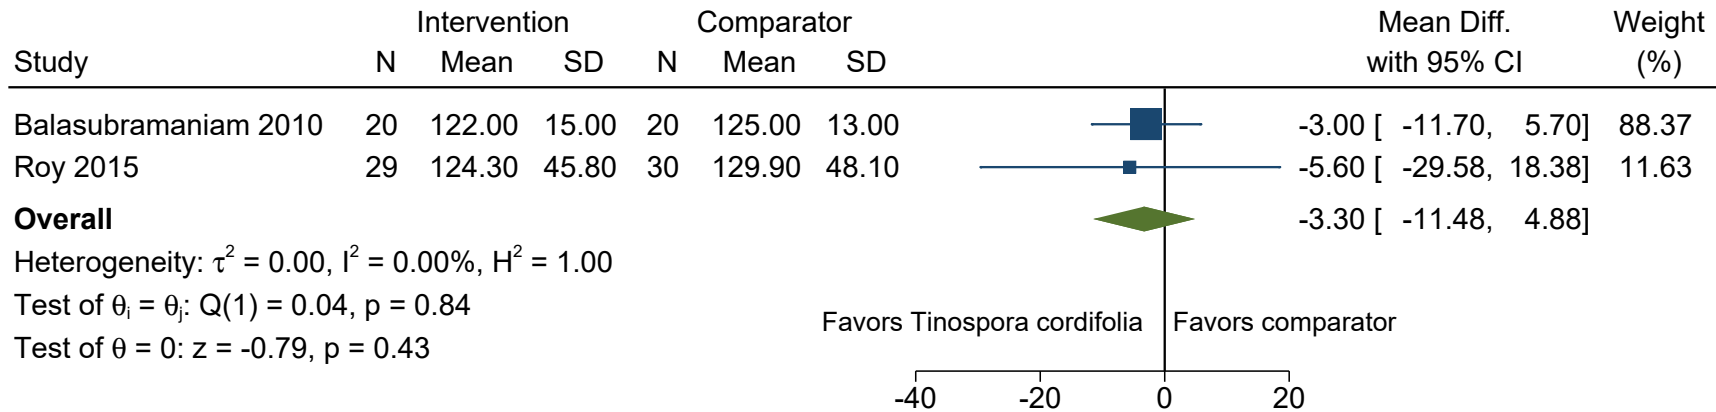

Random-effects REML model

Supplement: Data_Sheet_1.zip [file Data_Sheet_1.zip]

# Cyamopsis tetragonoloba - HDL-C

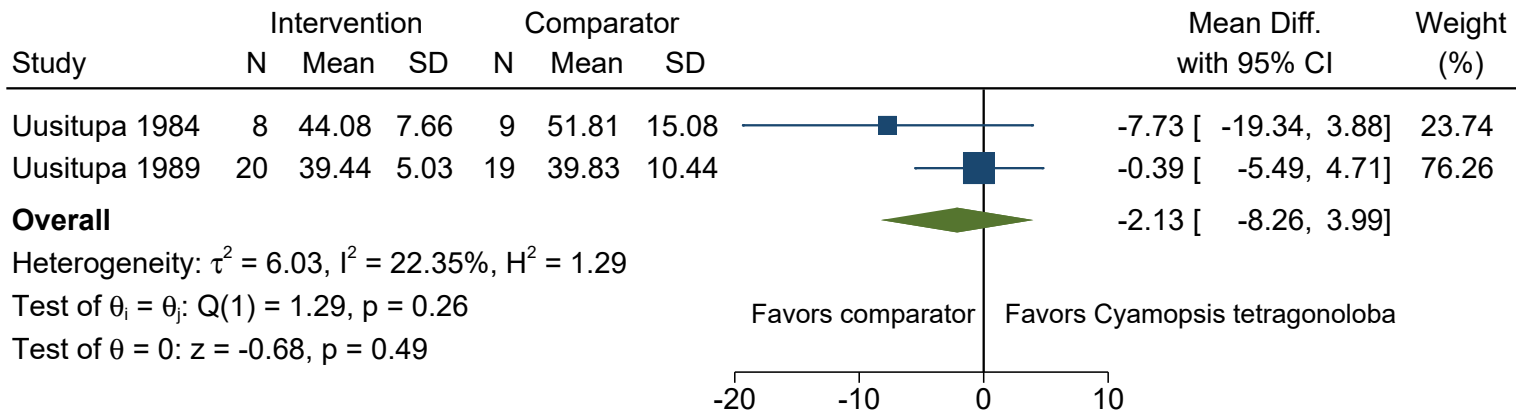

Random-effects REML model

Supplement: Data_Sheet_1.zip [file Data_Sheet_1.zip]

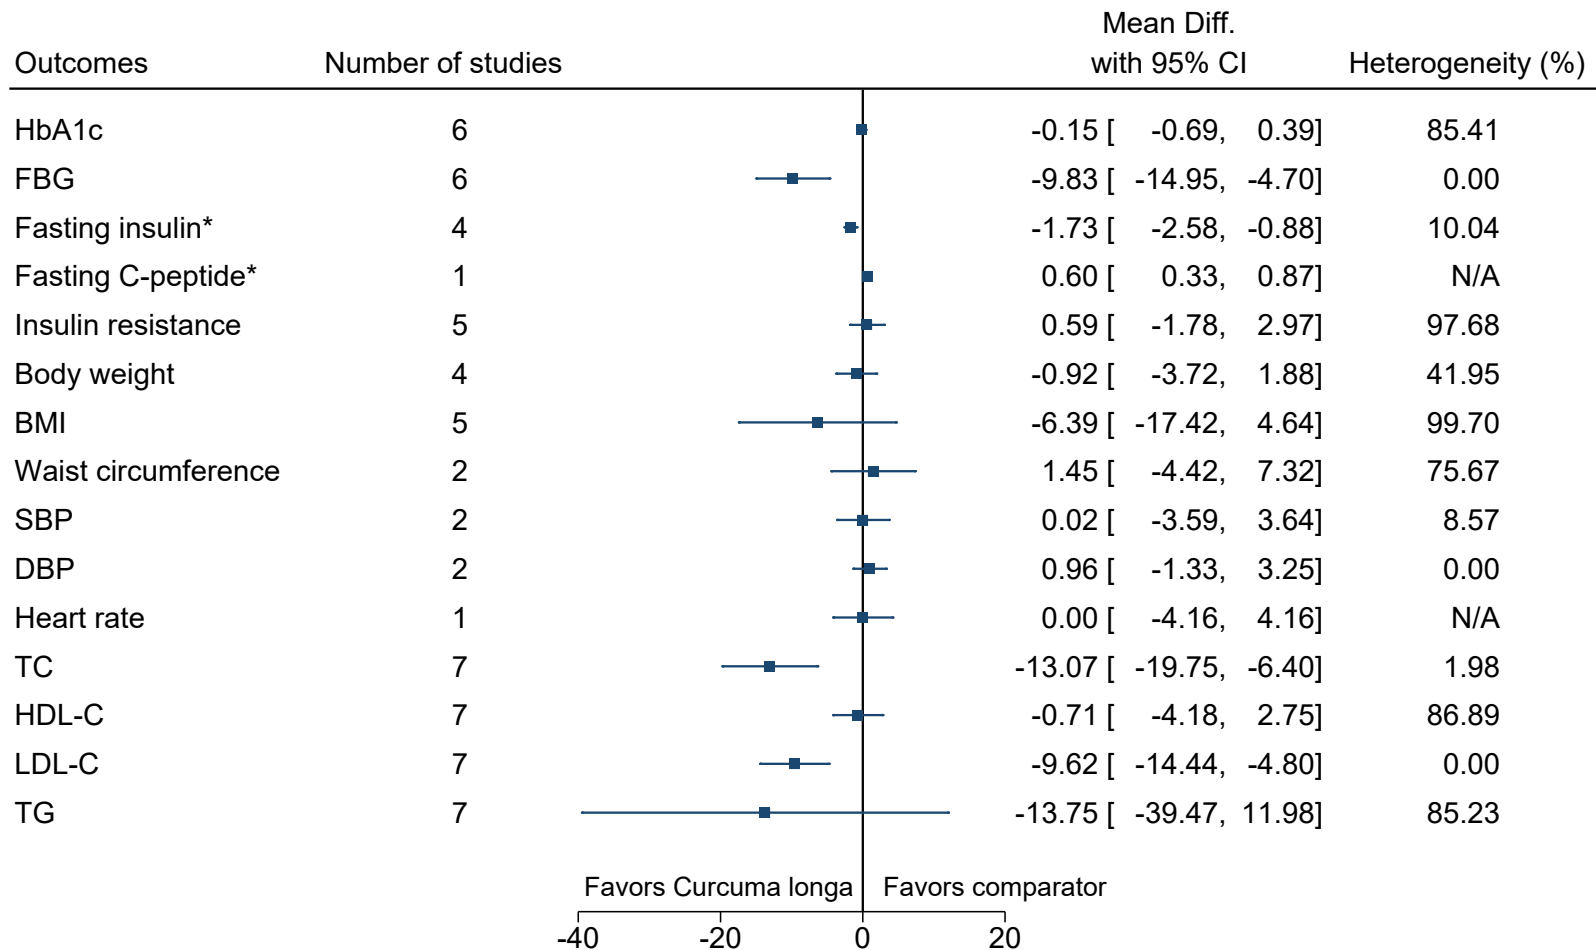

\*Favors intervention/comparator as insulin sensitizer

Supplement: Data_Sheet_1.zip [file Data_Sheet_1.zip]

# Trigonella foenum-graecum - Fasting insulin

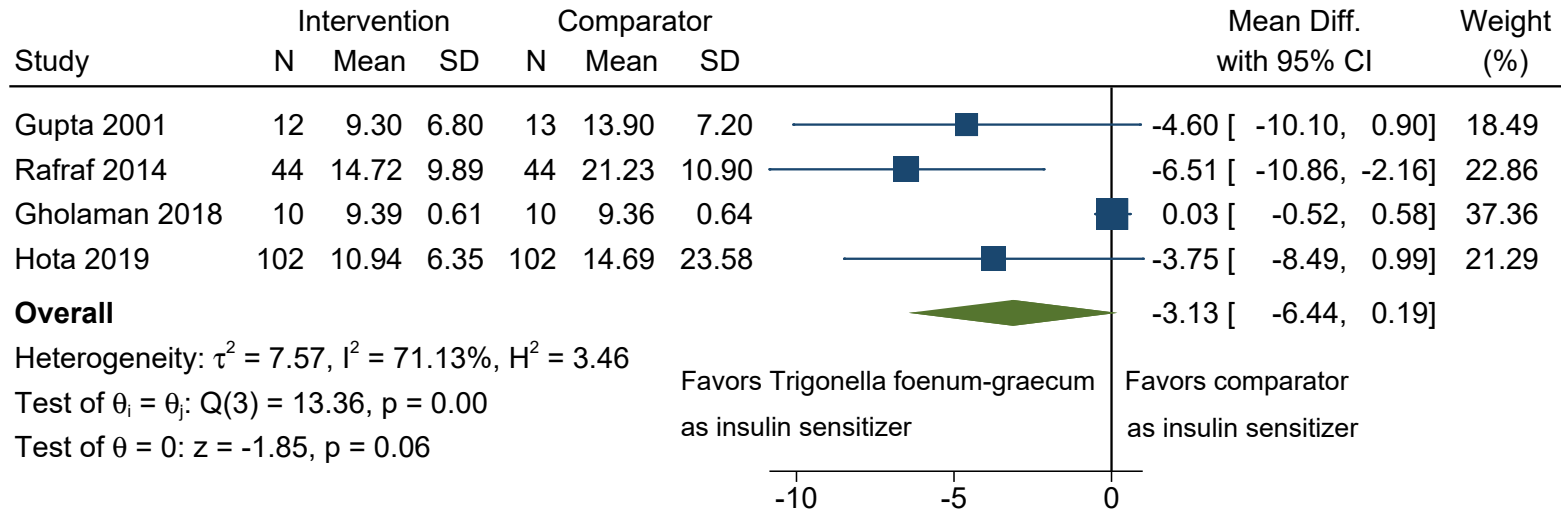

Random-effects REML model

Supplement: Data_Sheet_1.zip [file Data_Sheet_1.zip]

# Elettaria cardamomum - HbA1c

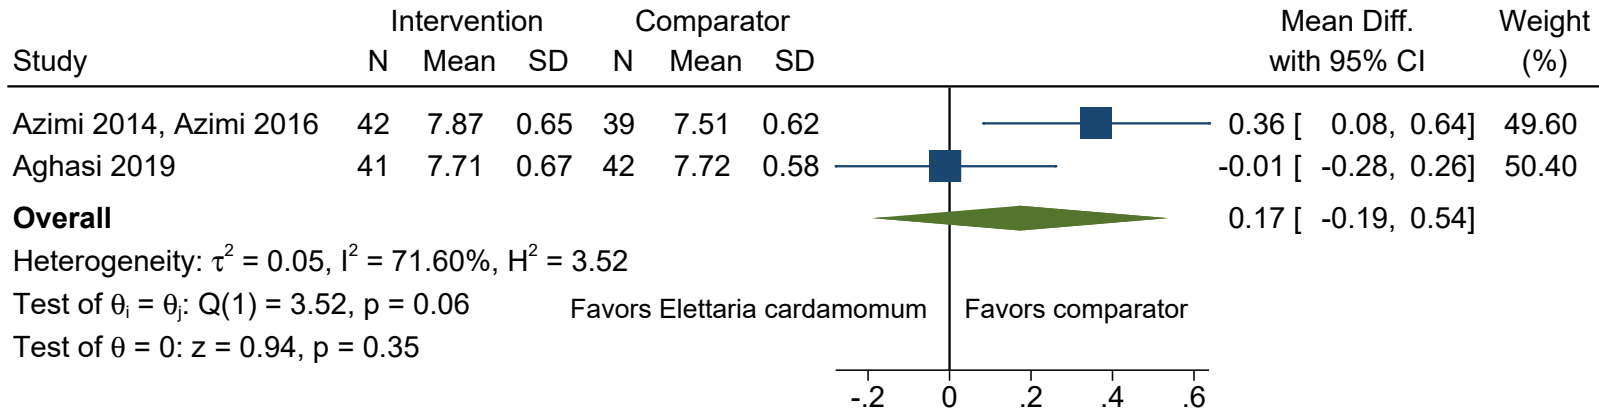

Random-effects REML model

Supplement: Data_Sheet_1.zip [file Data_Sheet_1.zip]

# Zingiber officinale - Waist circumference

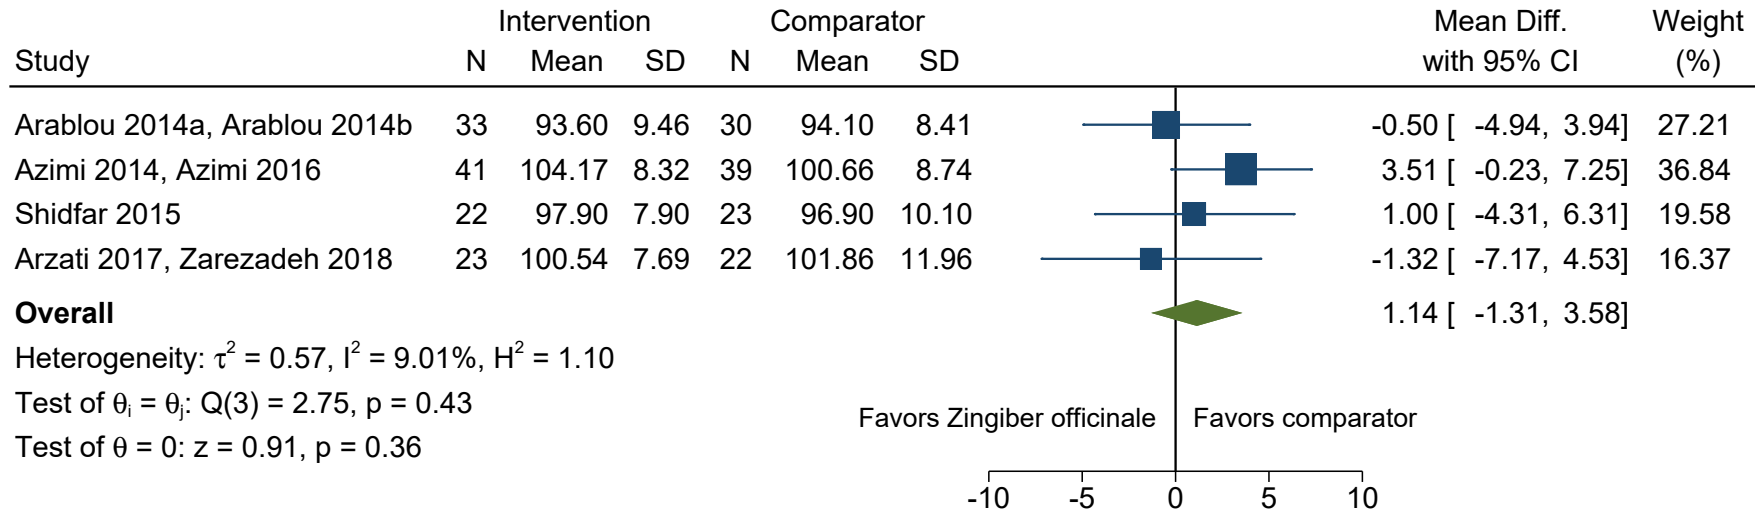

Random-effects REML model

Supplement: Data_Sheet_1.zip [file Data_Sheet_1.zip]

# Allium sativum - TG

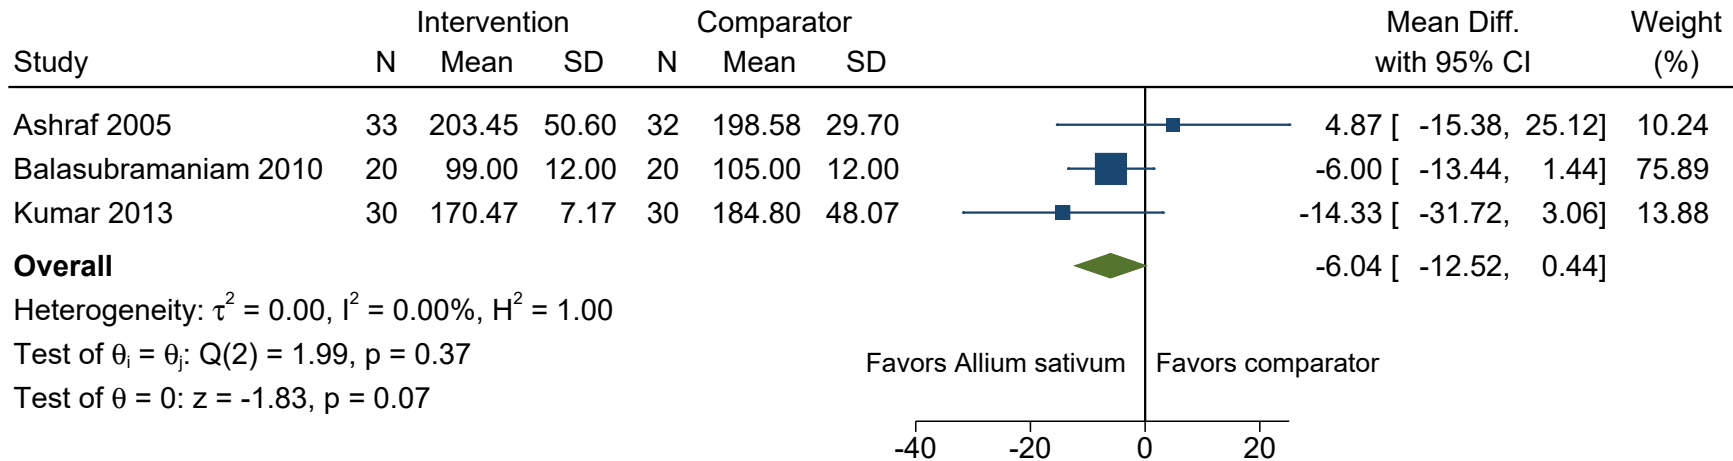

Random-effects REML model

Supplement: Data_Sheet_1.zip [file Data_Sheet_1.zip]

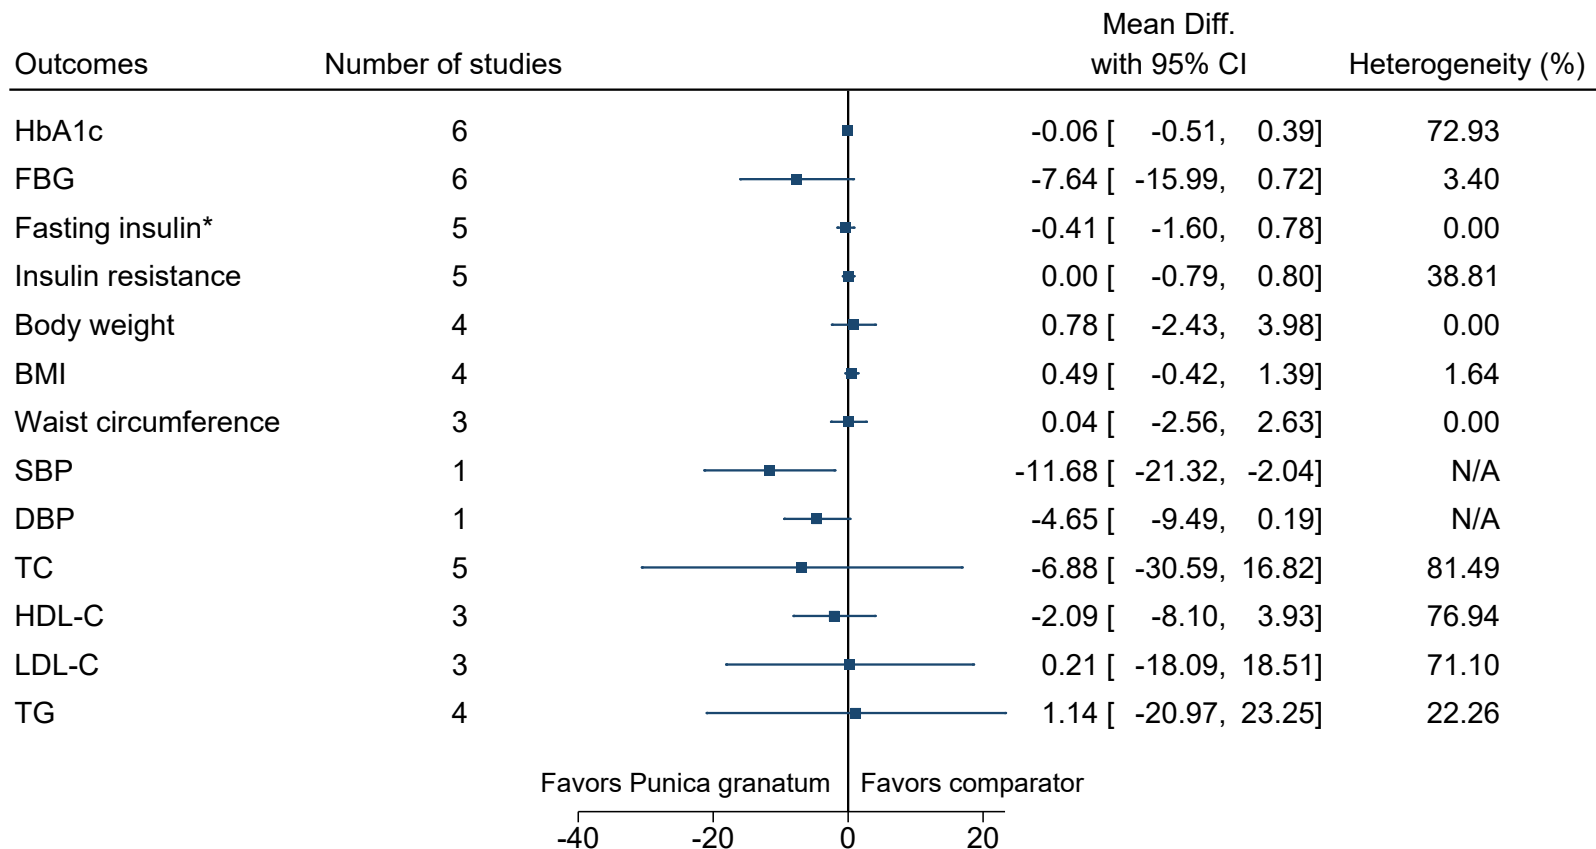

\*Favors intervention/comparator as insulin sensitizer

Supplement: Data_Sheet_1.zip [file Data_Sheet_1.zip]

# Camellia sinensis - HDL-C

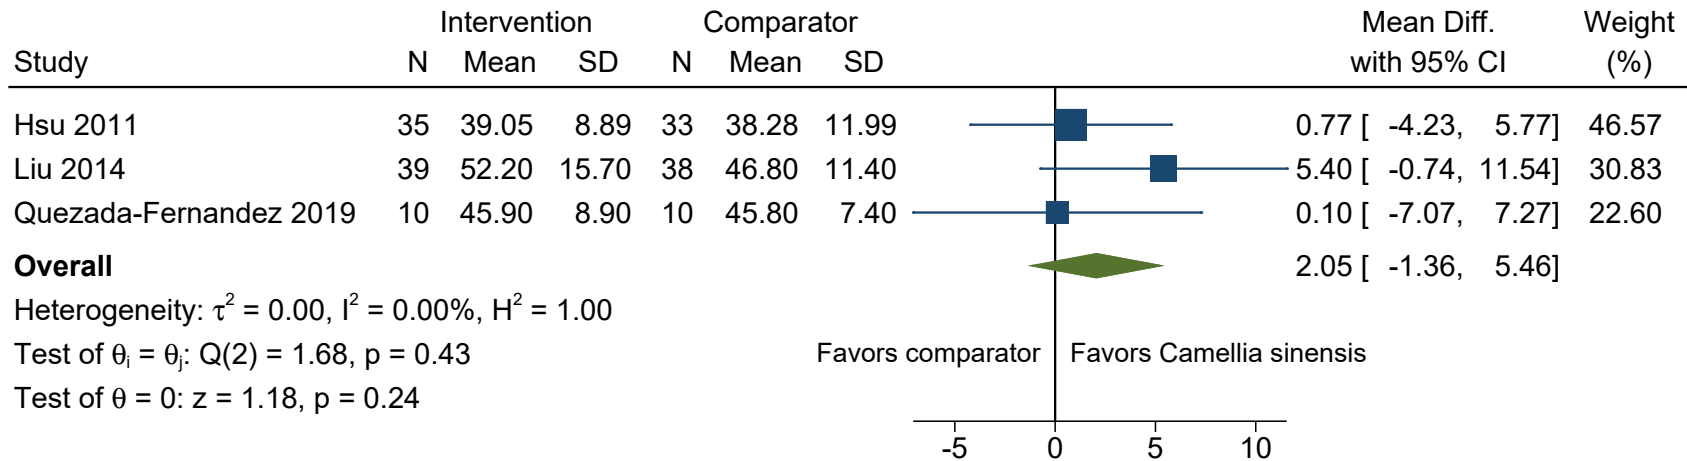

Random-effects REML model

Supplement: Data_Sheet_1.zip [file Data_Sheet_1.zip]

# Shilajit - HDL-C

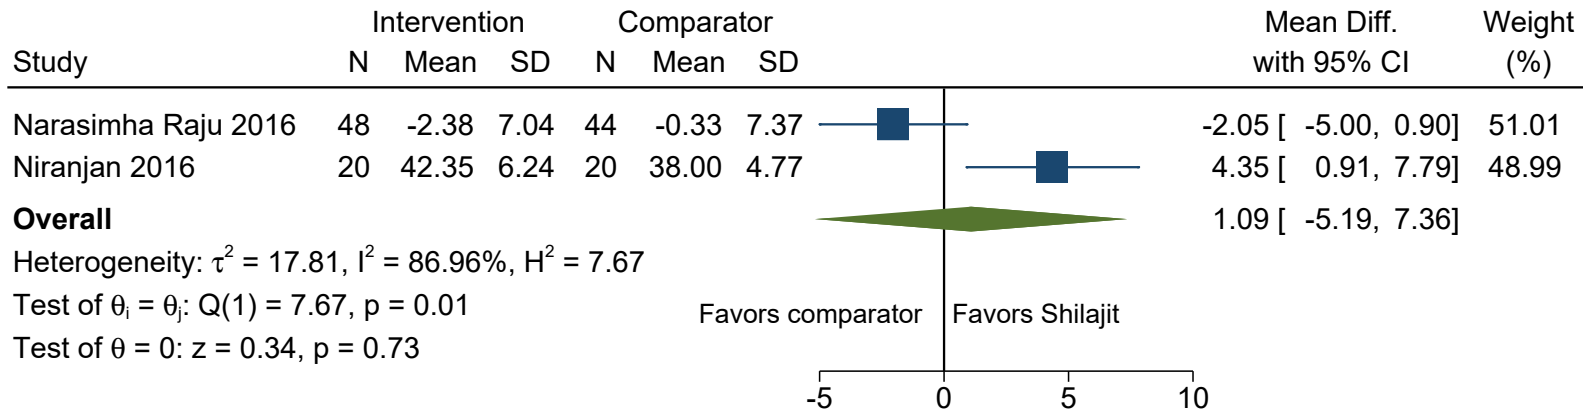

Random-effects REML model

Supplement: Data_Sheet_1.zip [file Data_Sheet_1.zip]

# Trigonella foenum-graecum - FBG - country subgroup analysis

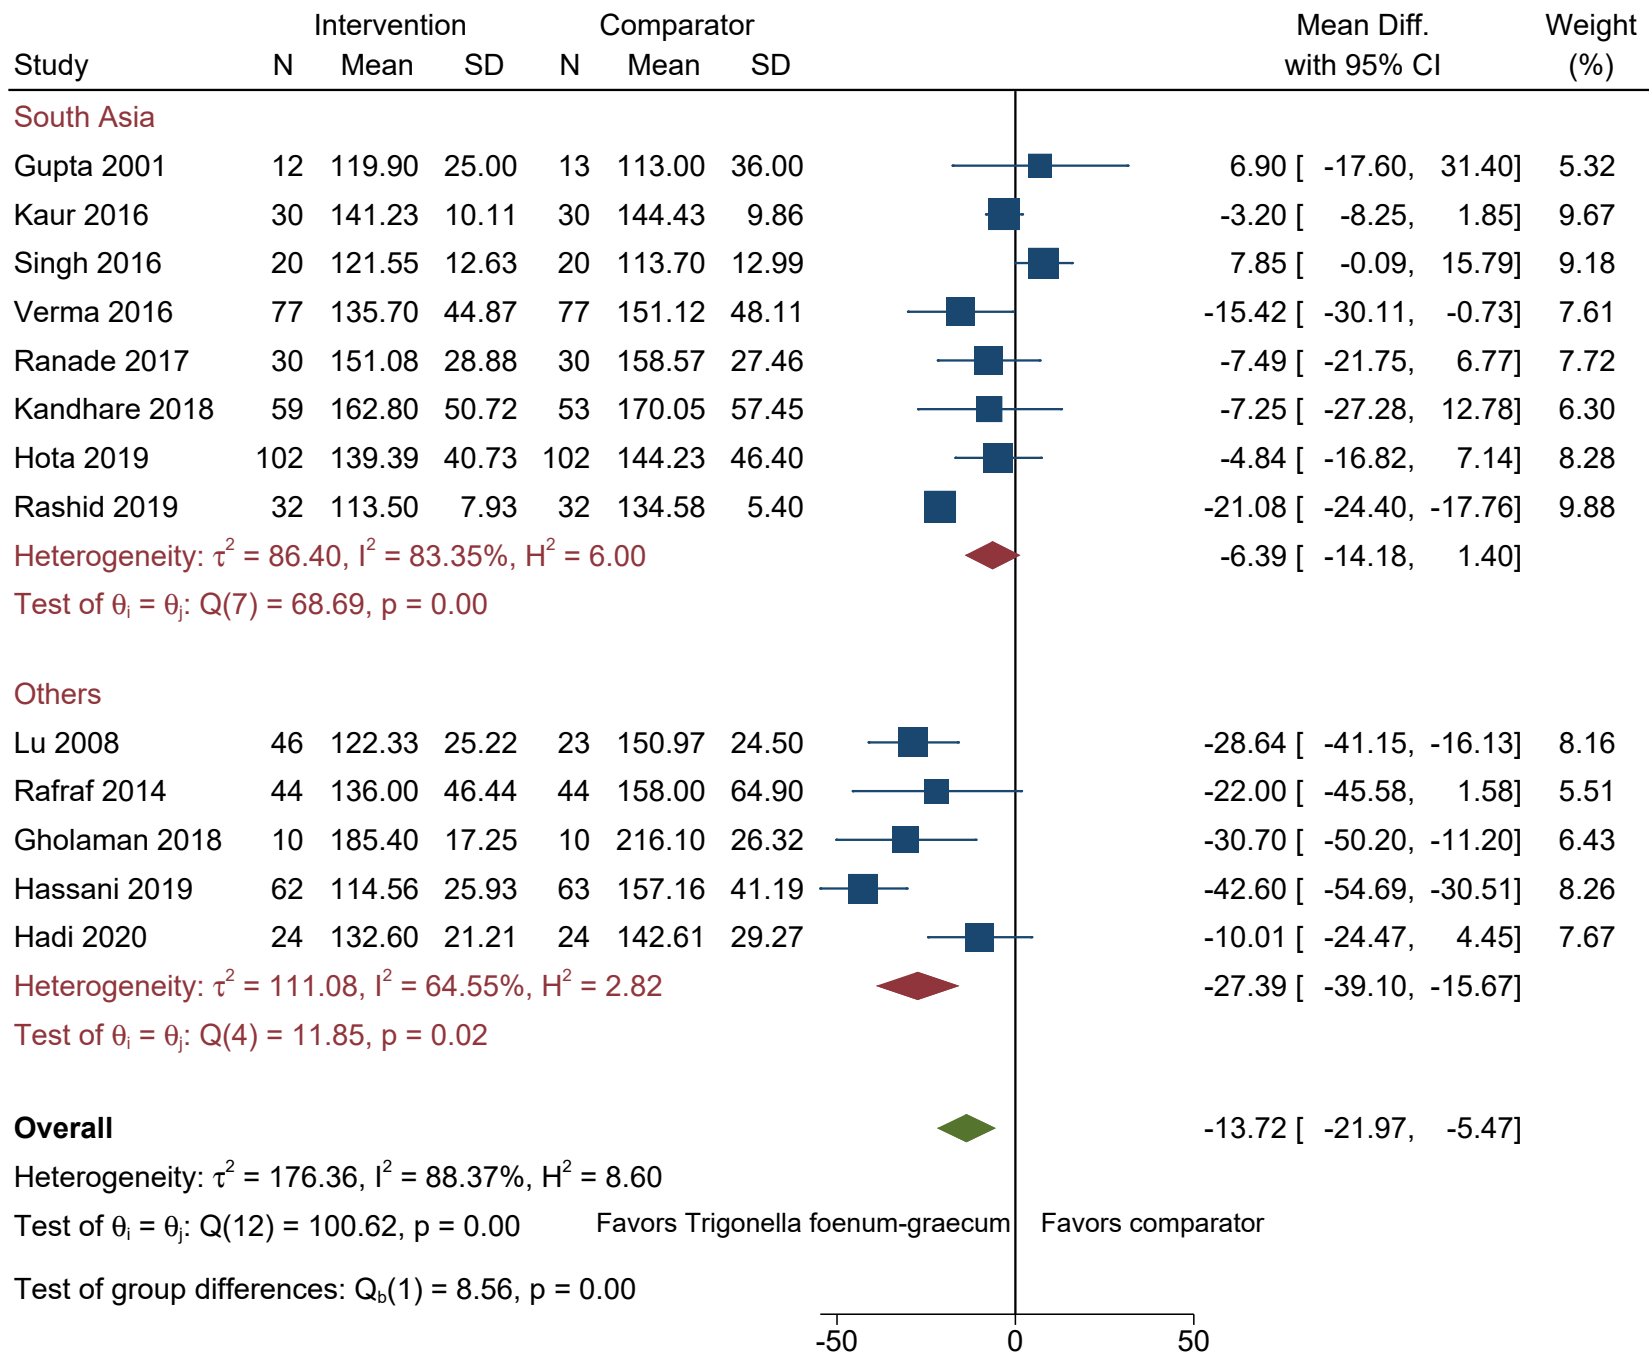

Supplement: Data_Sheet_1.zip [file Data_Sheet_1.zip]

# Curcuma longa - HbA1c

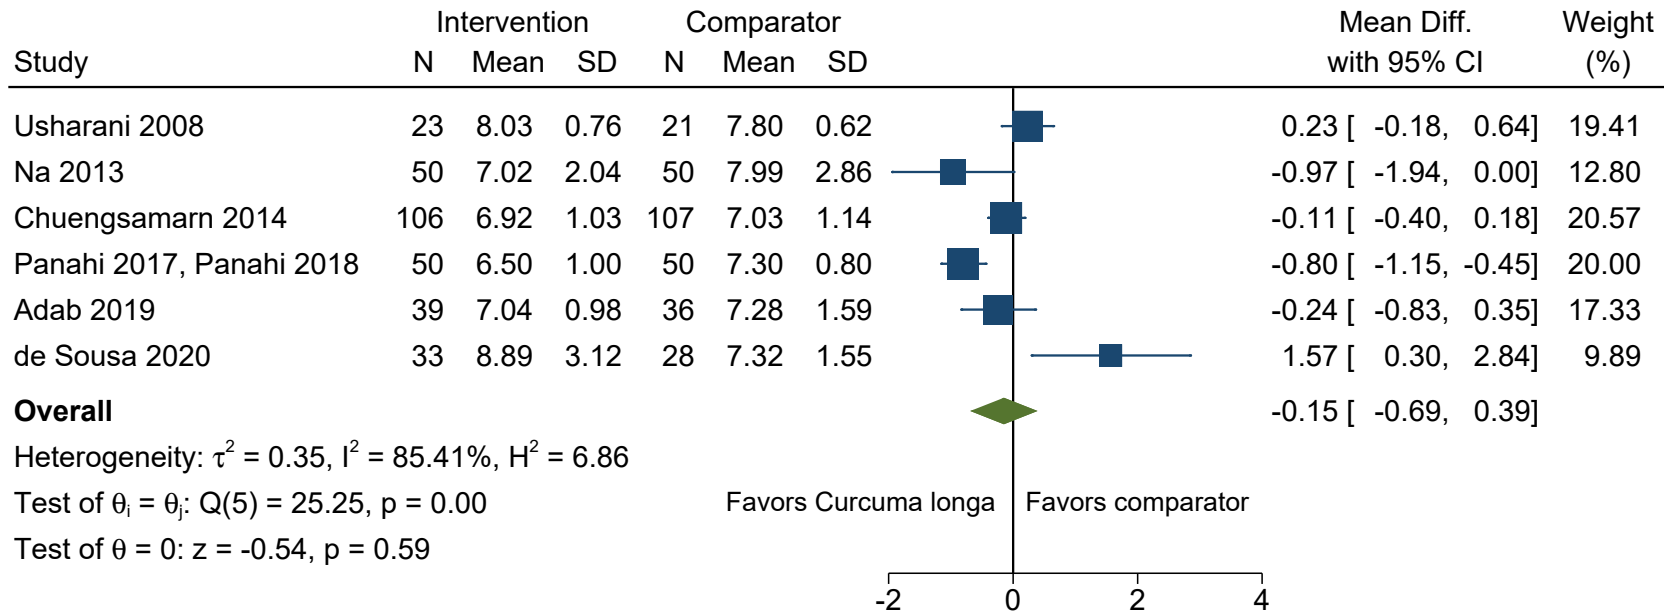

Random-effects REML model

Supplement: Data_Sheet_1.zip [file Data_Sheet_1.zip]

# Nigella sativa - LDL-C

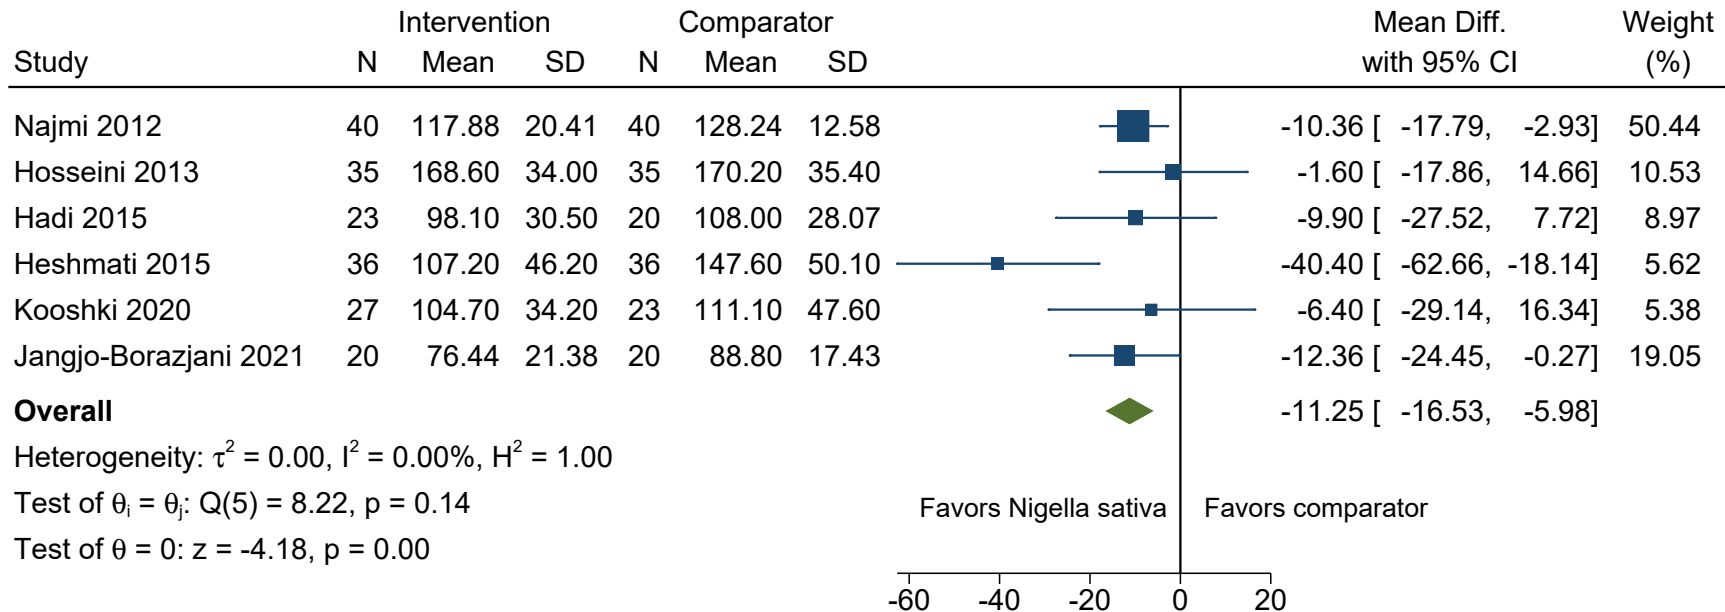

Supplement: Data_Sheet_1.zip [file Data_Sheet_1.zip]

# Coccinia grandis - FBG

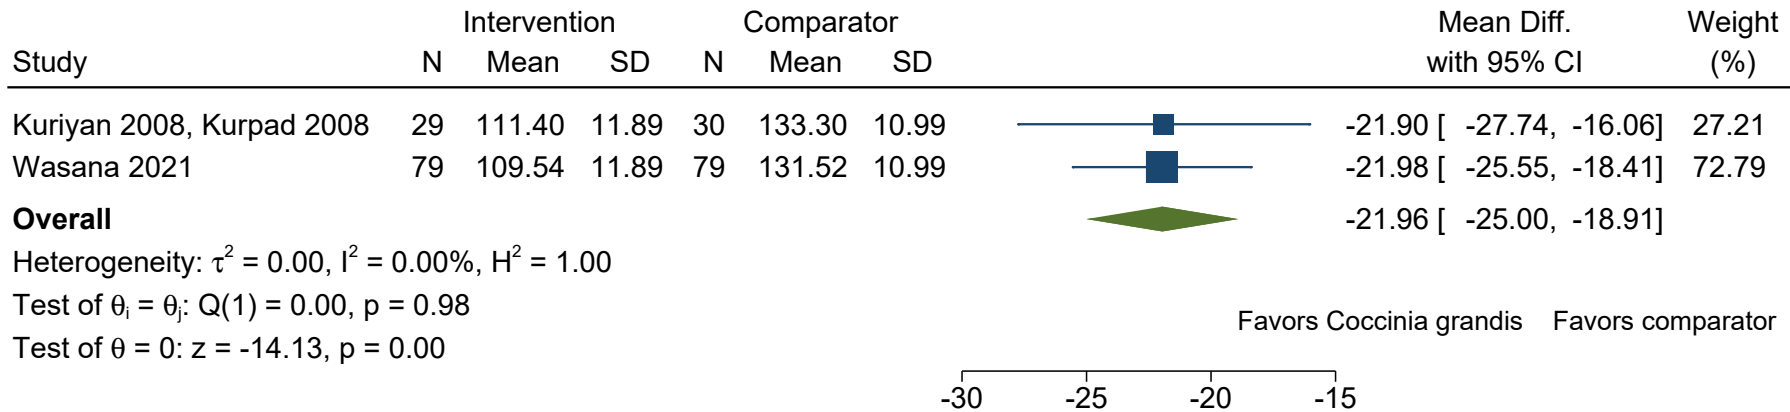

Random-effects REML model

Supplement: Data_Sheet_1.zip [file Data_Sheet_1.zip]

# Plantago ovata - FBG

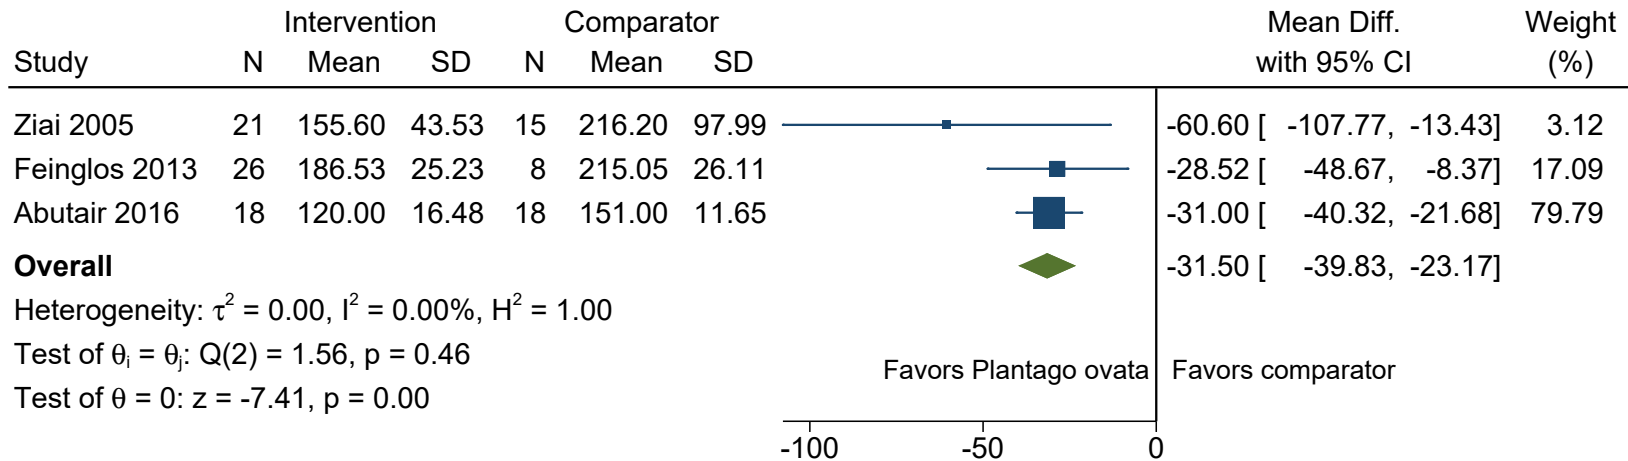

Random-effects REML model

Supplement: Data_Sheet_1.zip [file Data_Sheet_1.zip]

# Trigonella foenum-graecum - TG

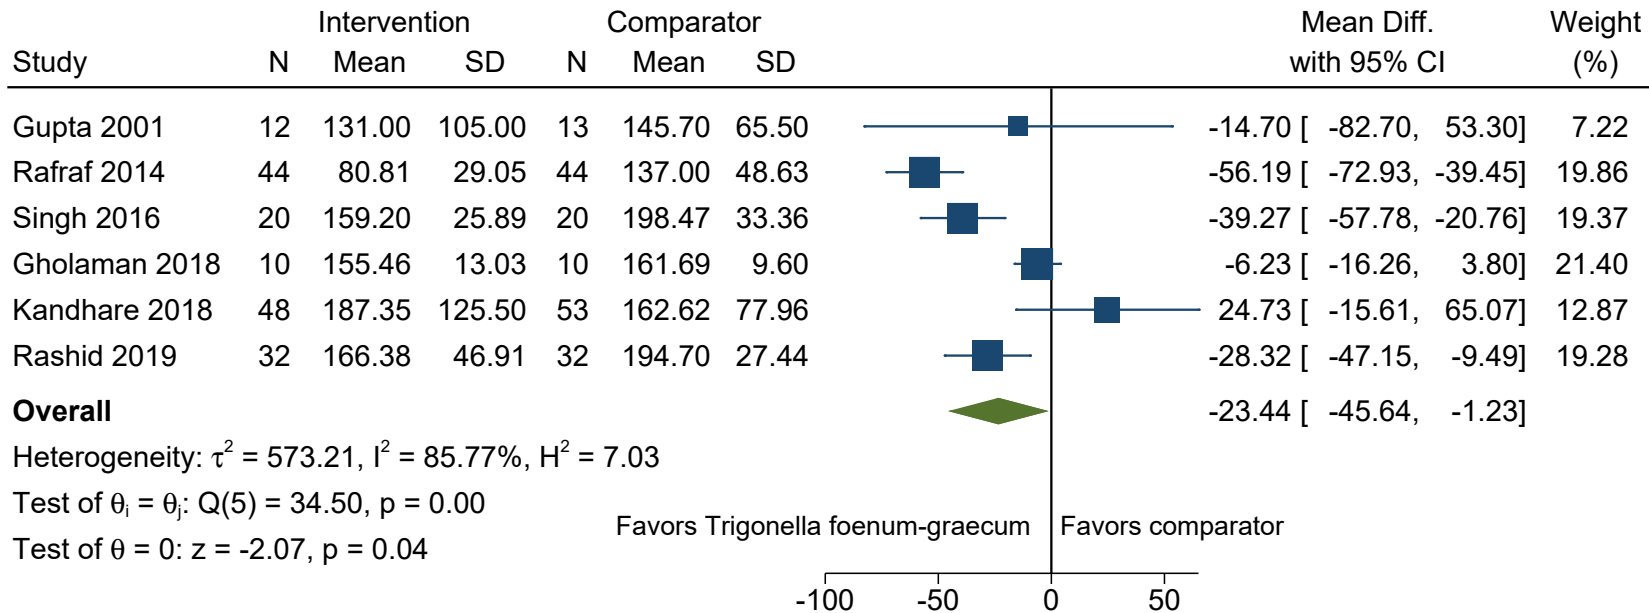

Supplement: Data_Sheet_1.zip [file Data_Sheet_1.zip]

## Camellia sinensis - TC

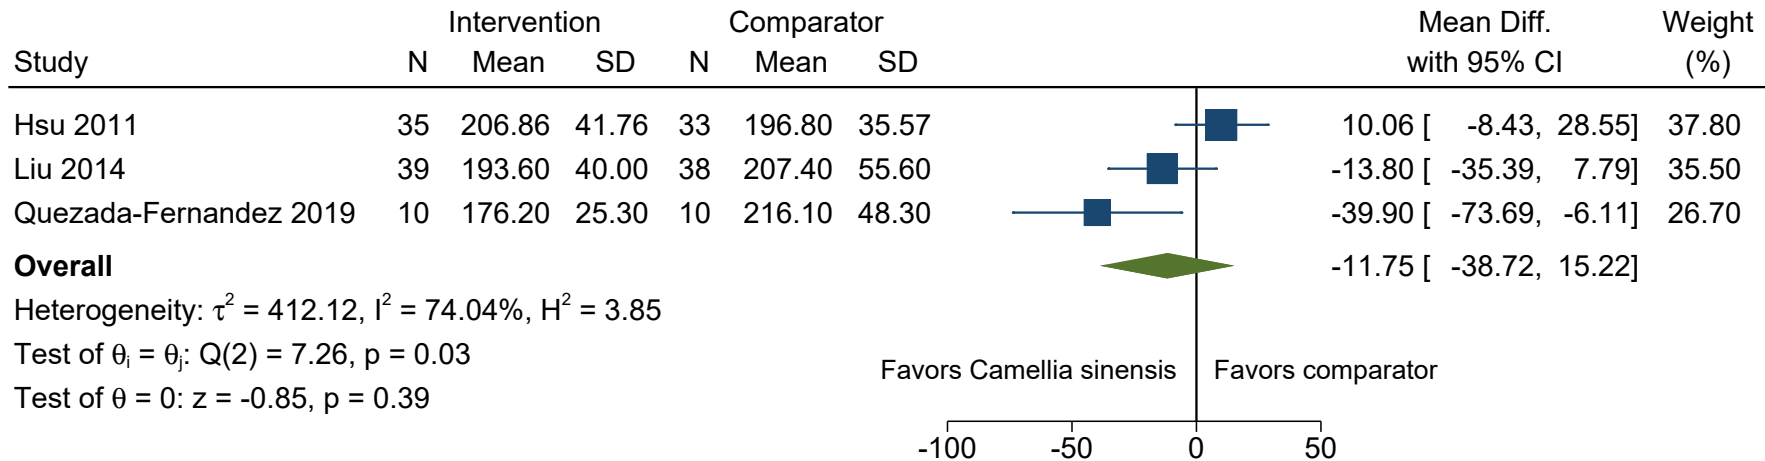

Random-effects REML model

Supplement: Data_Sheet_1.zip [file Data_Sheet_1.zip]

# Curcuma longa - HDL-C

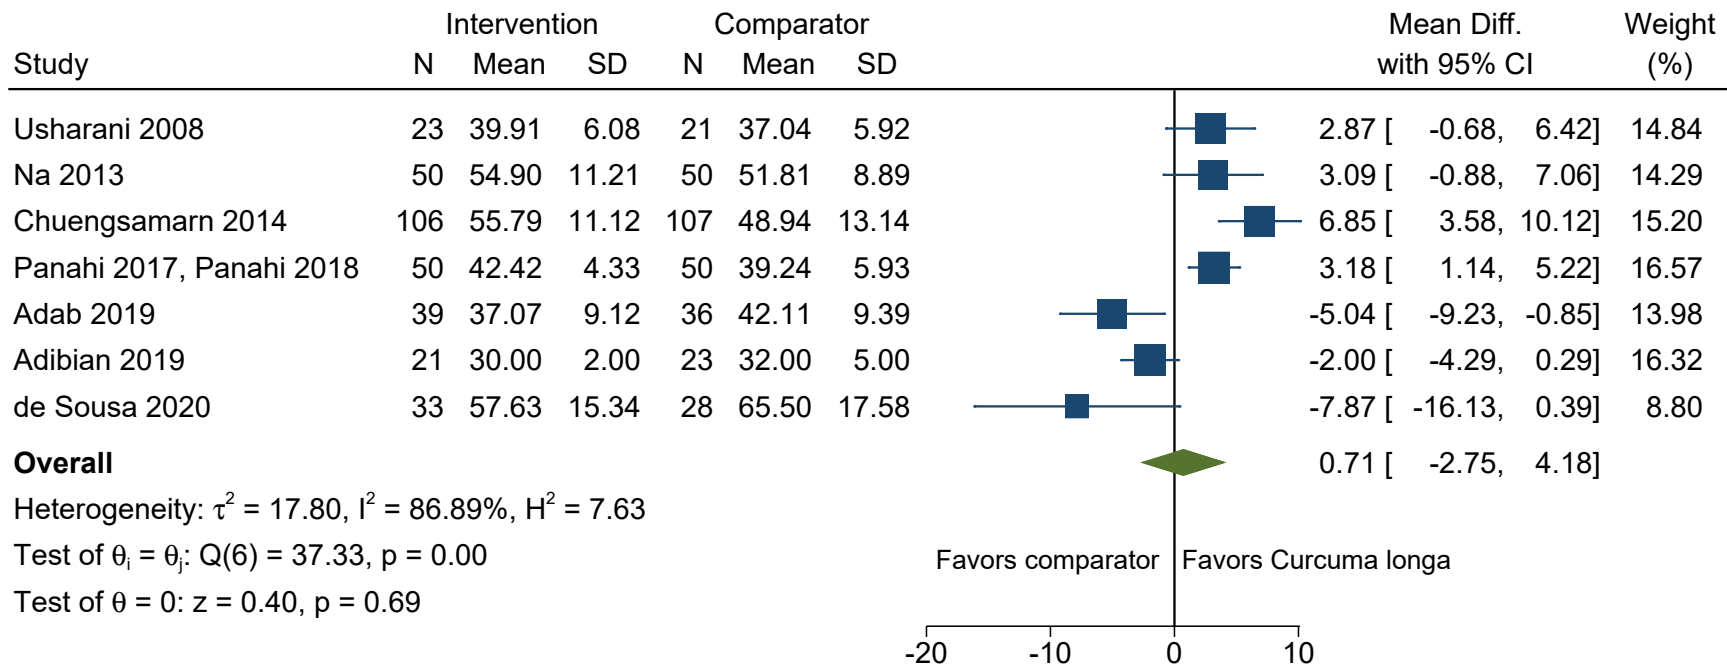

Supplement: Data_Sheet_1.zip [file Data_Sheet_1.zip]

# Crocus sativus - SBP

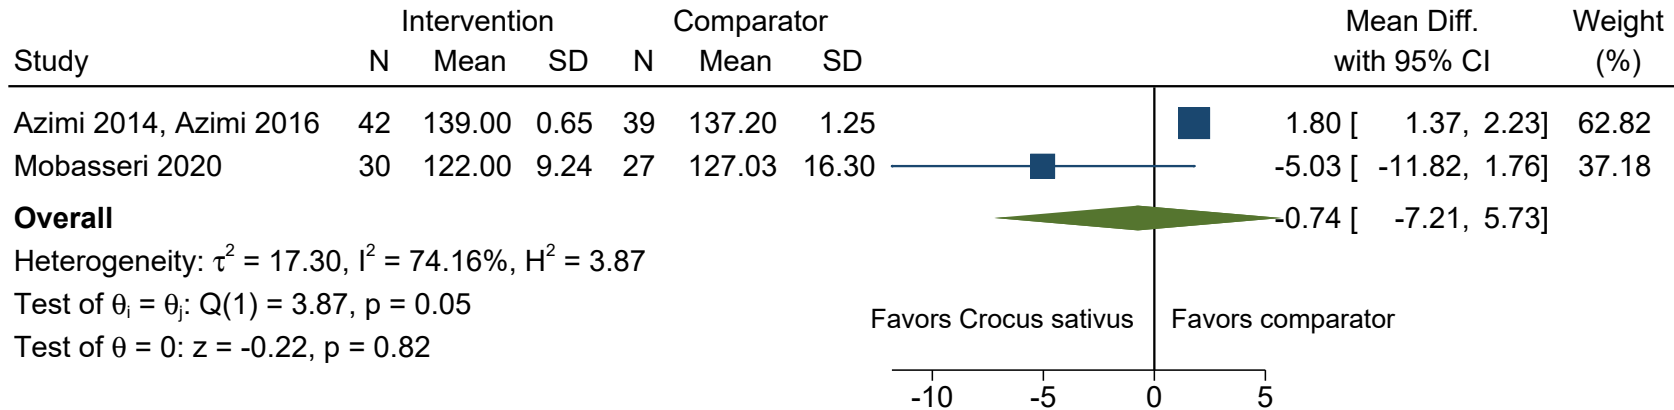

Random-effects REML model

Supplement: Data_Sheet_1.zip [file Data_Sheet_1.zip]

# Trigonella foenum-graecum - BMI

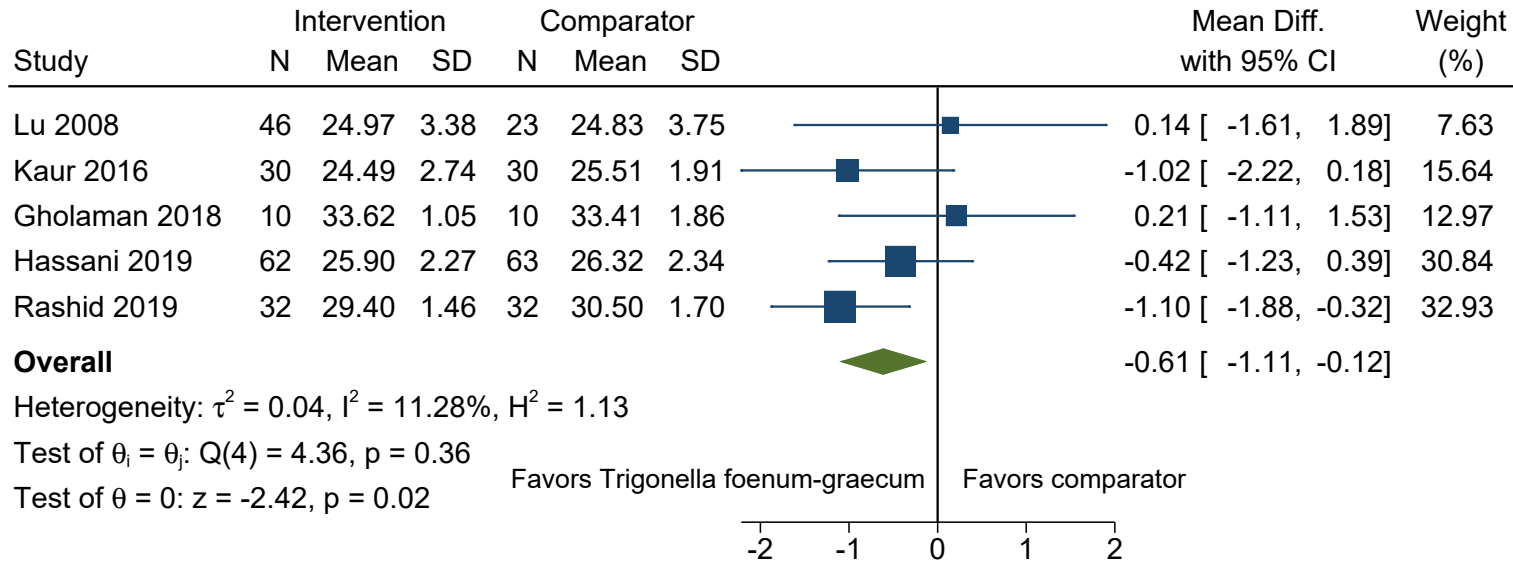

Random-effects REML model

Supplement: Data_Sheet_1.zip [file Data_Sheet_1.zip]

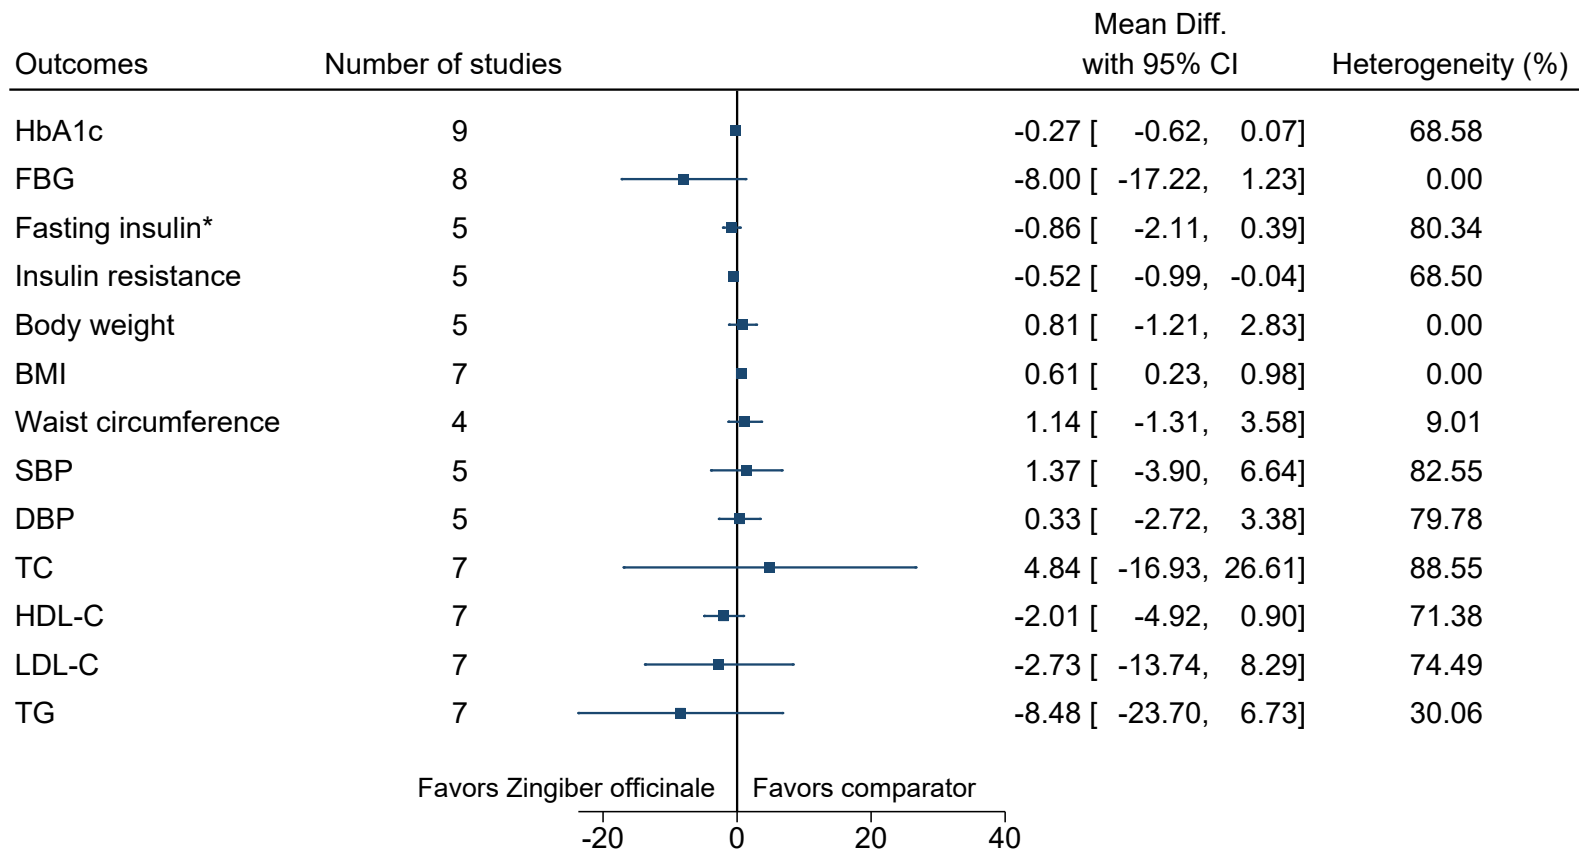

\*Favours intervention/comparator as insulin sensitizer

Supplement: Data_Sheet_1.zip [file Data_Sheet_1.zip]

# Cuminum cyminum - FBG

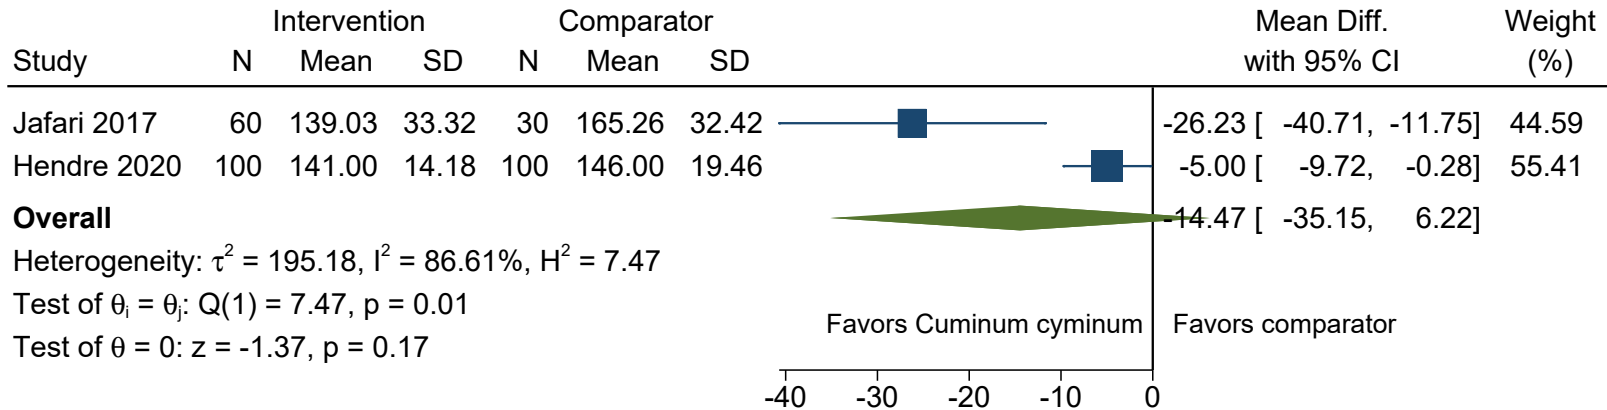

Random-effects REML model

Supplement: Data_Sheet_1.zip [file Data_Sheet_1.zip]

# Trigonella foenum-graecum - HbA1c

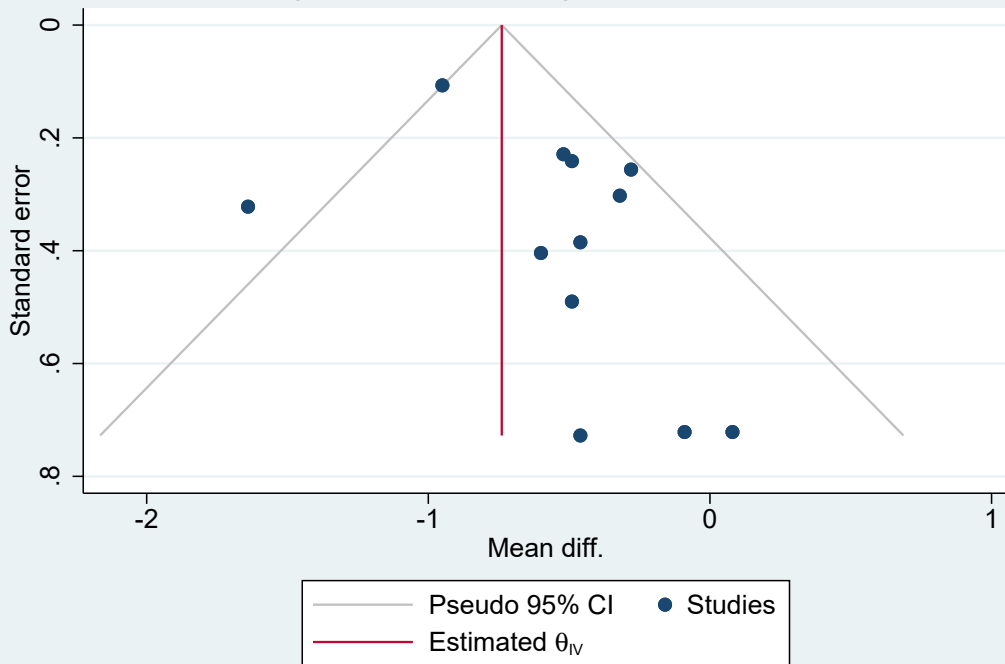

Supplement: Data_Sheet_1.zip [file Data_Sheet_1.zip]

# Crocus sativus - Body weight

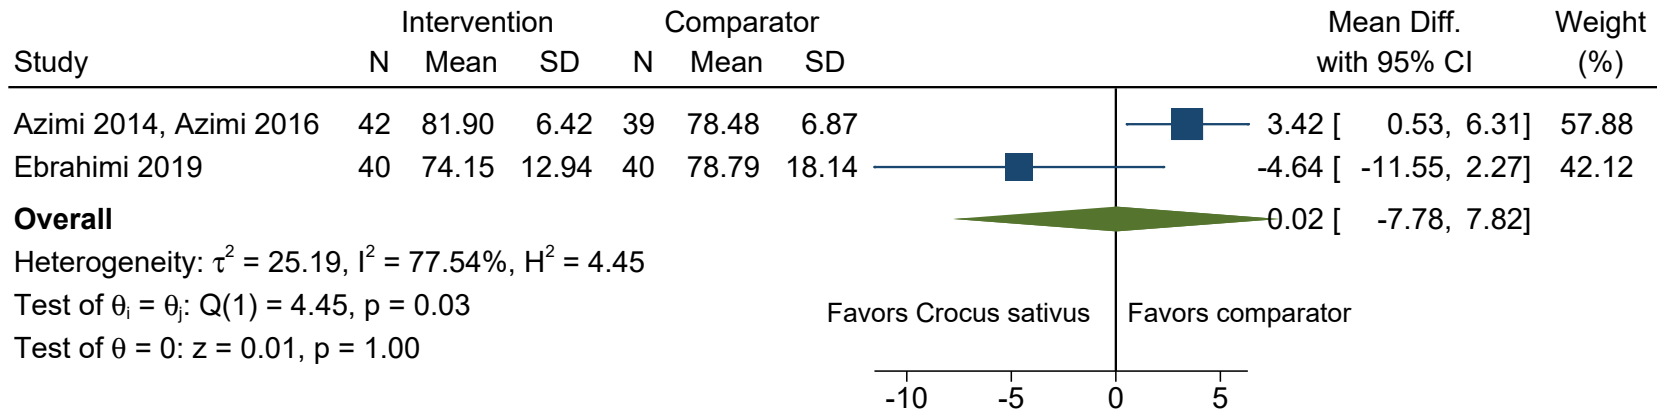

Random-effects REML model

Supplement: Data_Sheet_1.zip [file Data_Sheet_1.zip]

# Cinnamomum verum - TC

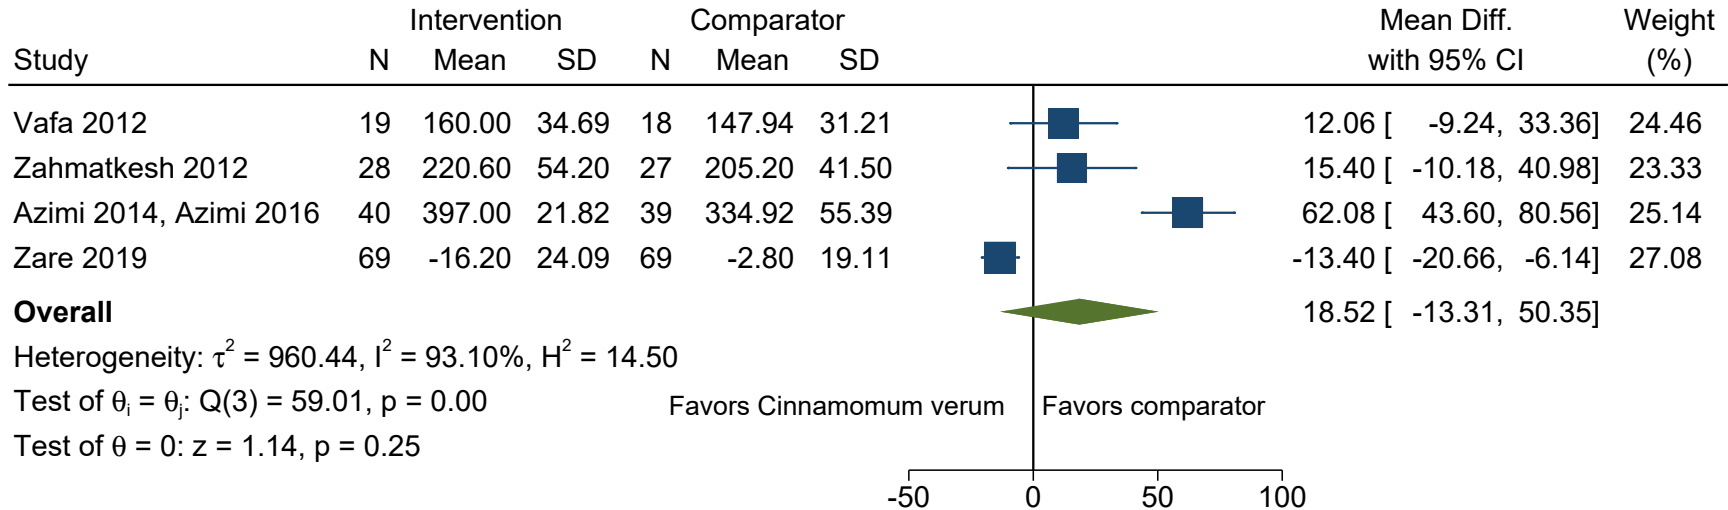

Random-effects REML model

Supplement: Data_Sheet_1.zip [file Data_Sheet_1.zip]

# Azadirachta indica - HDL-C

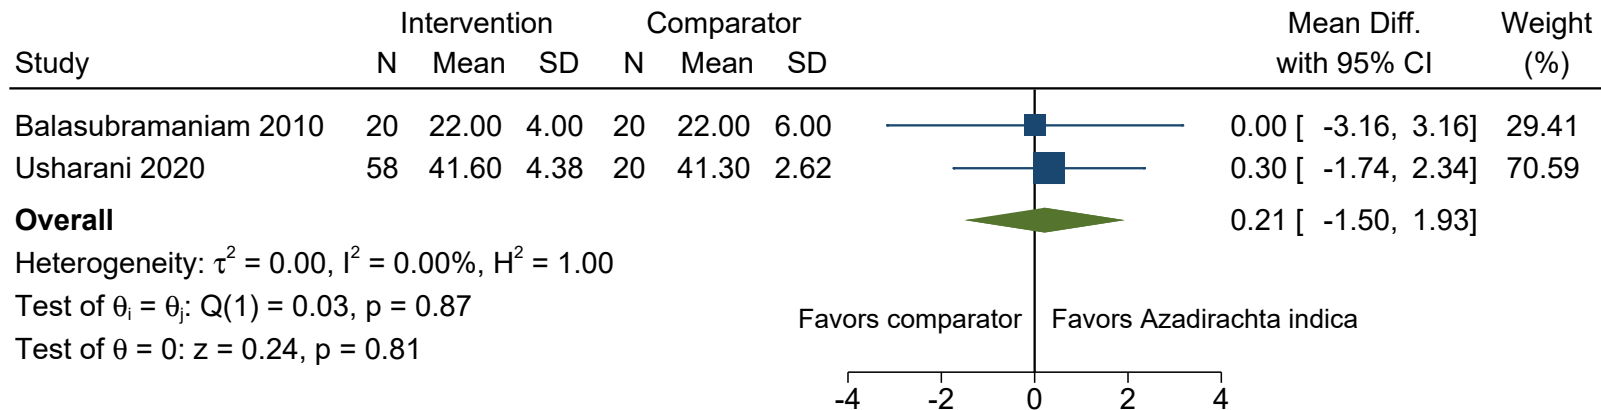

Random-effects REML model

Supplement: Data_Sheet_1.zip [file Data_Sheet_1.zip]

# Tinospora cordifolia - TC

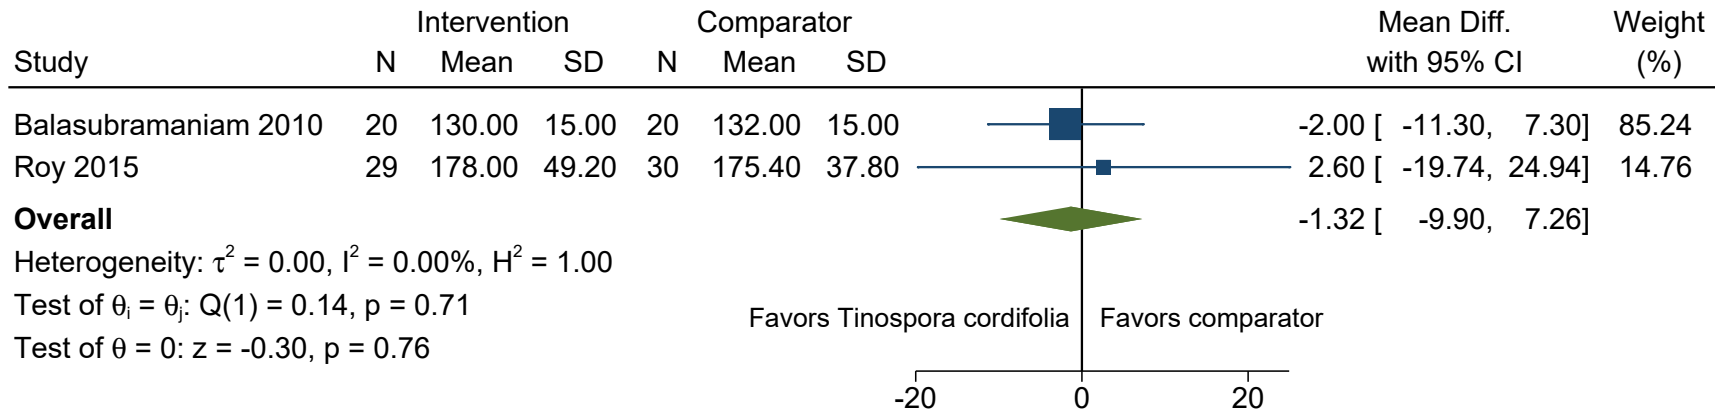

Random-effects REML model

Supplement: Data_Sheet_1.zip [file Data_Sheet_1.zip]

# Boswellia serrata - TC

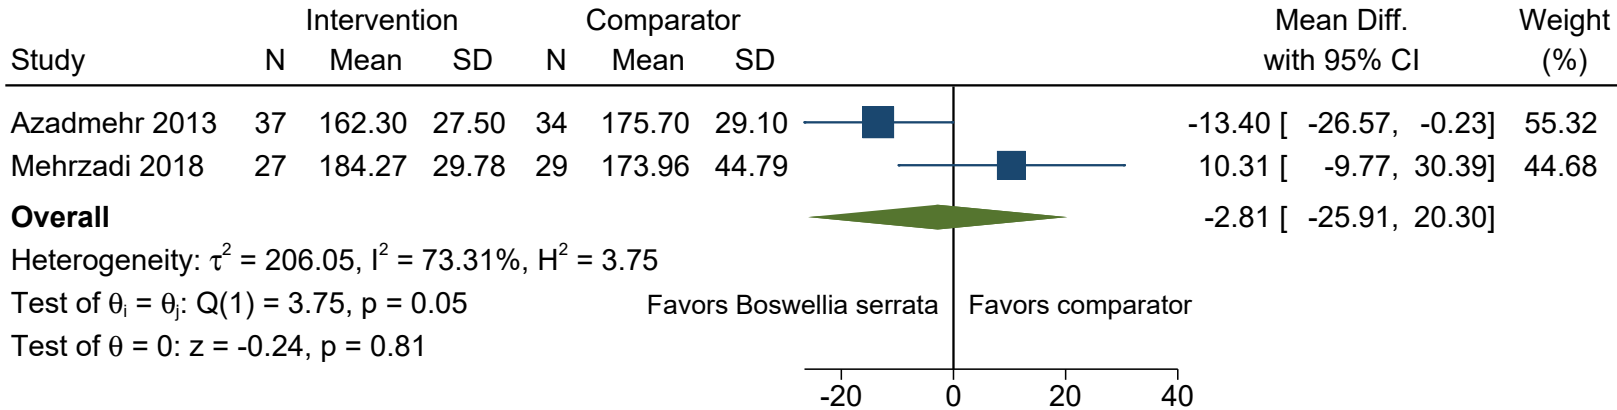

Random-effects REML model

Supplement: Data_Sheet_1.zip [file Data_Sheet_1.zip]

# Camellia sinensis - Insulin resistance

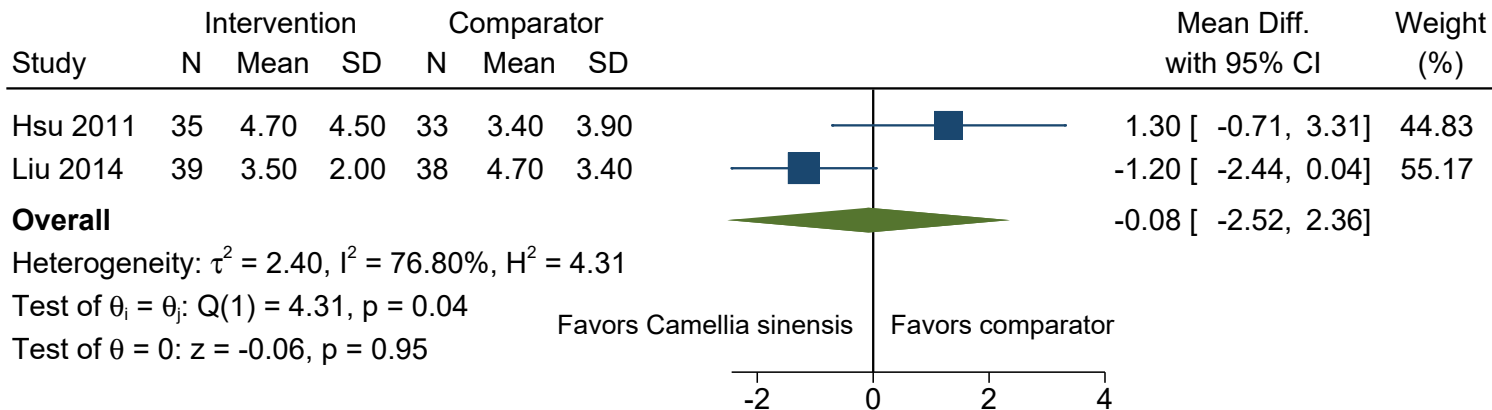

Random-effects REML model

Supplement: Data_Sheet_1.zip [file Data_Sheet_1.zip]

# Syzygium cumini - PPBG

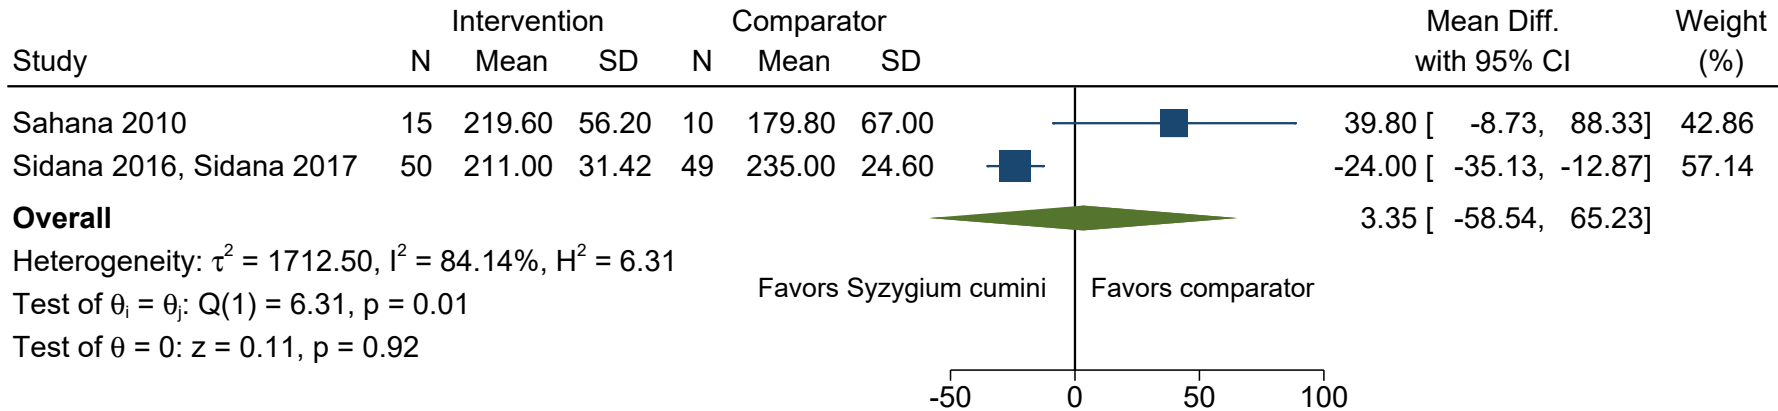

Random-effects REML model

Supplement: Data_Sheet_1.zip [file Data_Sheet_1.zip]

# Cinnamomum verum - Fasting insulin

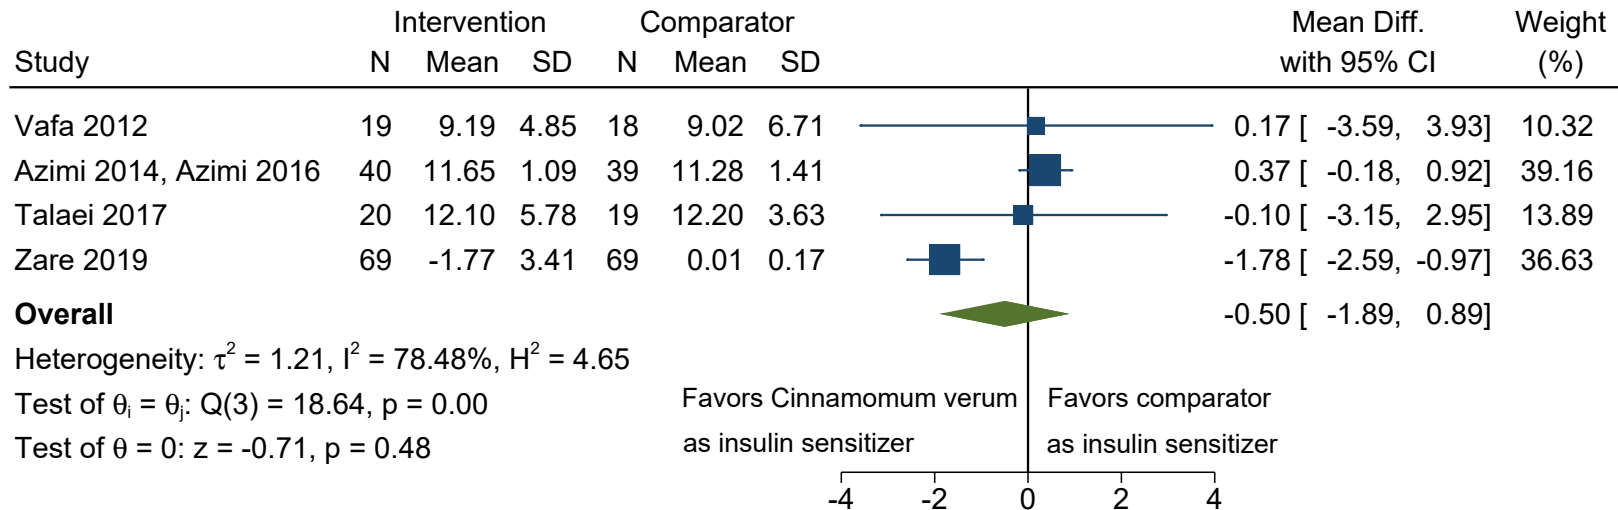

Random-effects REML model

Supplement: Data_Sheet_1.zip [file Data_Sheet_1.zip]

# Aloe vera - HbA1c

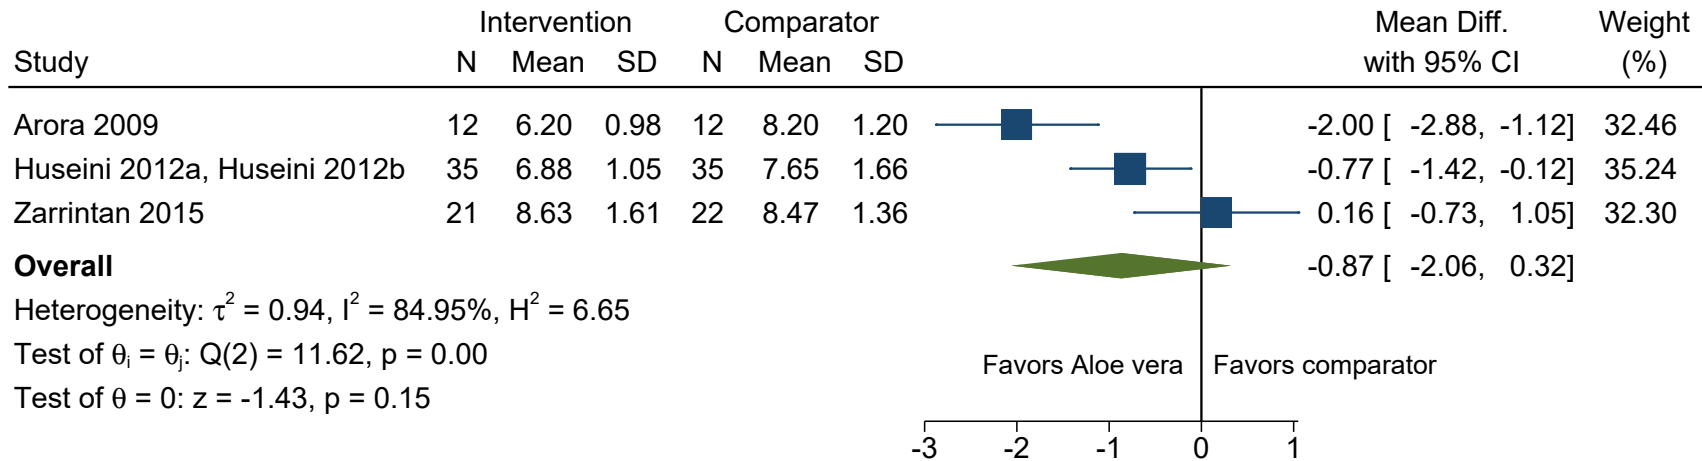

Random-effects REML model

Supplement: Data_Sheet_1.zip [file Data_Sheet_1.zip]

# Momordica charantia - TC

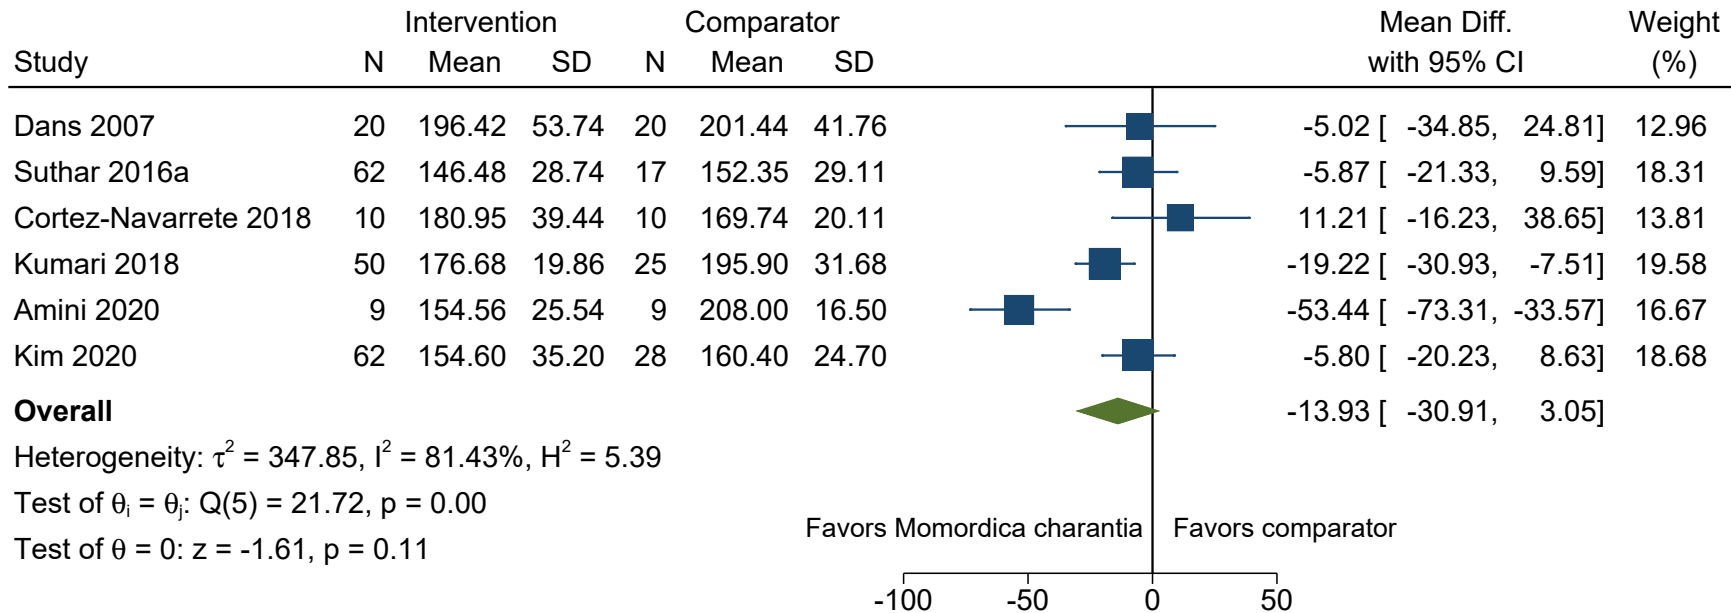

Supplement: Data_Sheet_1.zip [file Data_Sheet_1.zip]

# Cinnamomum aromaticum - FBG

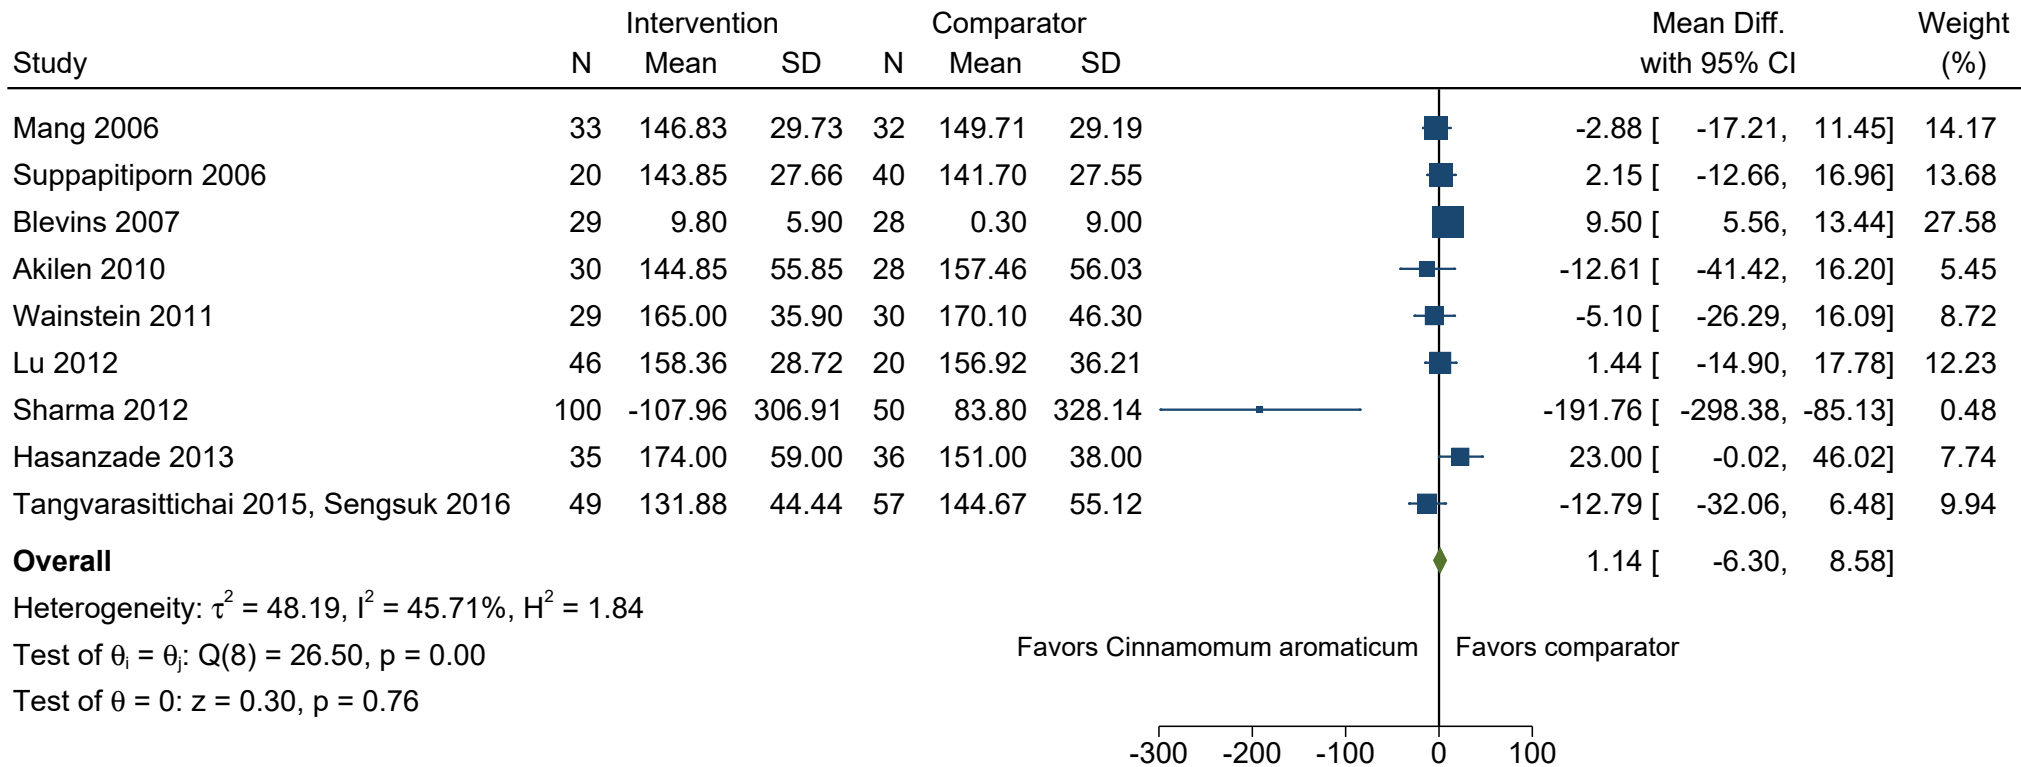

Supplement: Data_Sheet_1.zip [file Data_Sheet_1.zip]

# Elettaria cardamomum - Fasting insulin

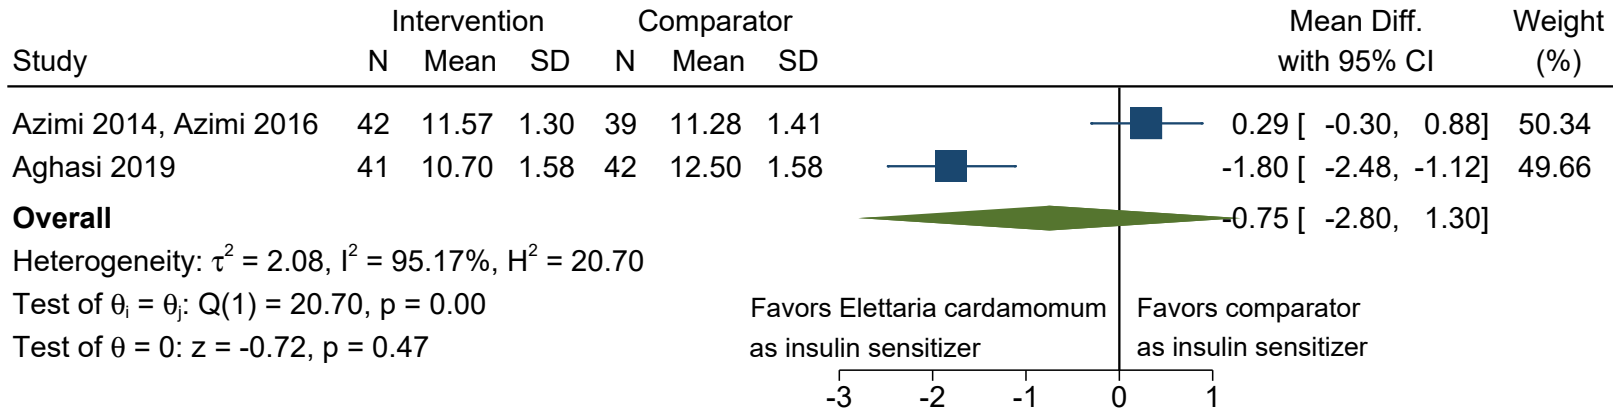

Random-effects REML model

Supplement: Data_Sheet_1.zip [file Data_Sheet_1.zip]

# Momordica charantia - PPBG

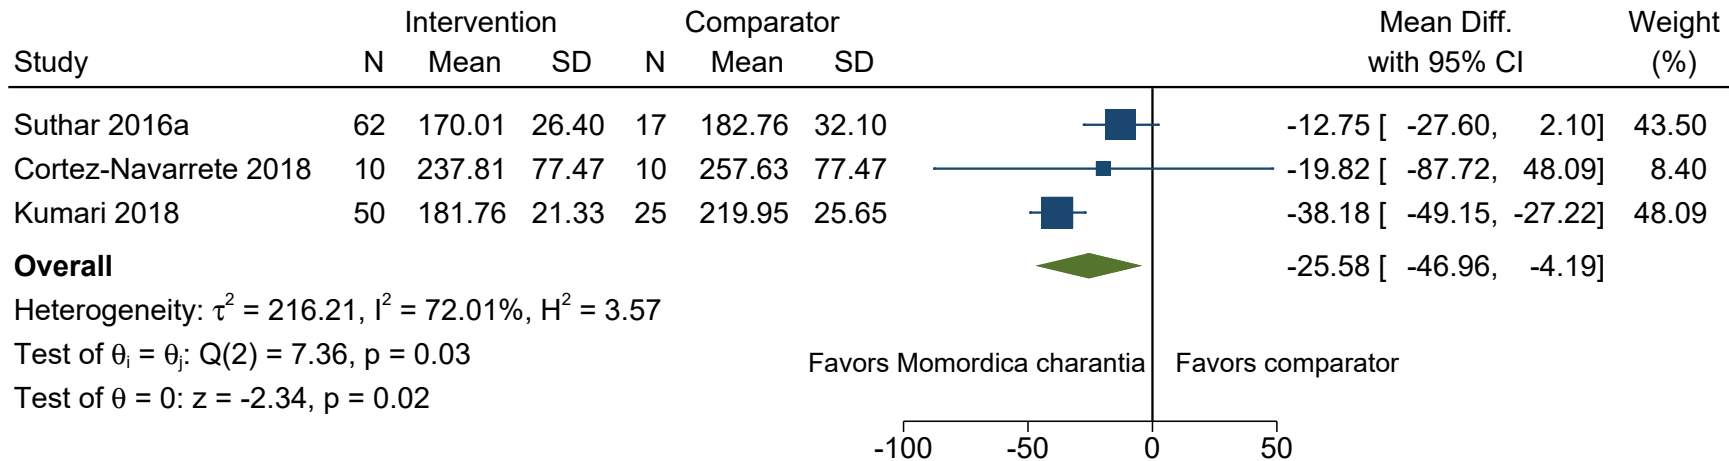

Random-effects REML model

Supplement: Data_Sheet_1.zip [file Data_Sheet_1.zip]

# Aegle marmelos - SBP

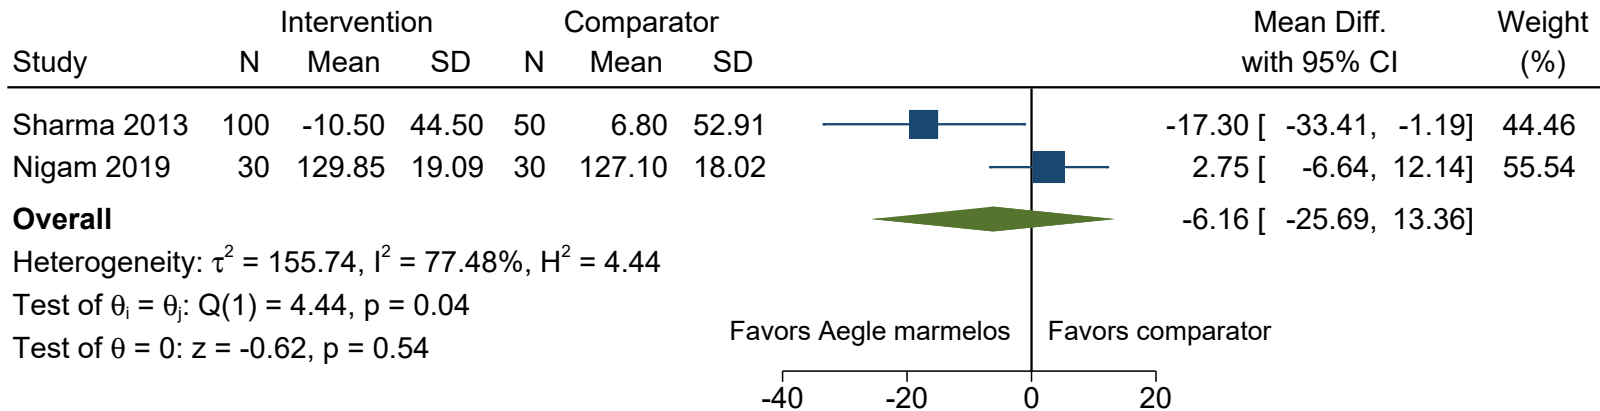

Random-effects REML model

Supplement: Data_Sheet_1.zip [file Data_Sheet_1.zip]

# Tinospora cordifolia - HDL-C

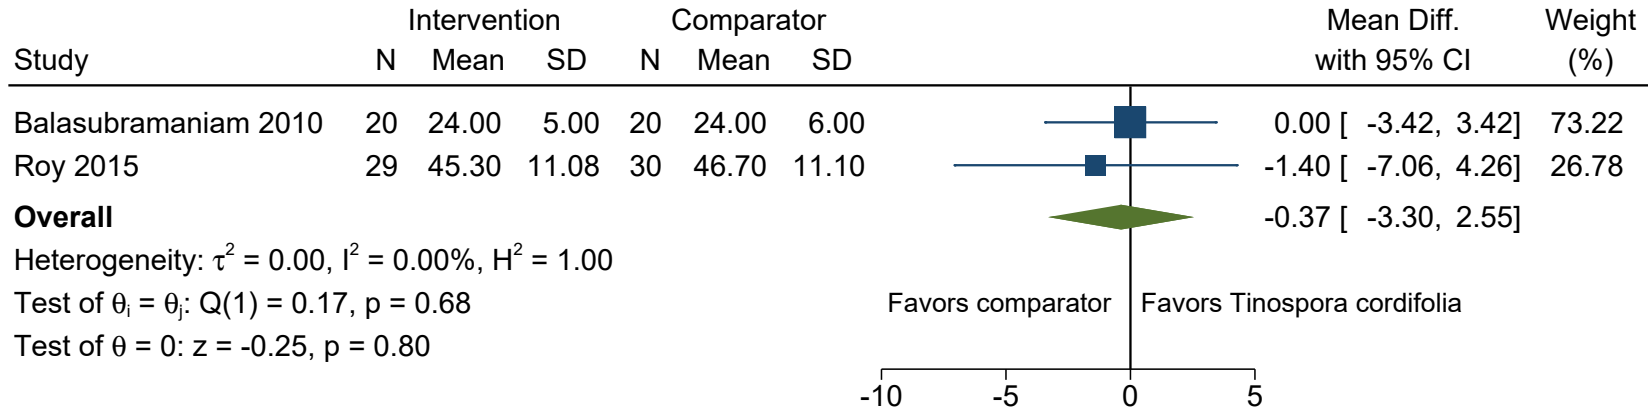

Random-effects REML model

Supplement: Data_Sheet_1.zip [file Data_Sheet_1.zip]

# Shilajit - TC

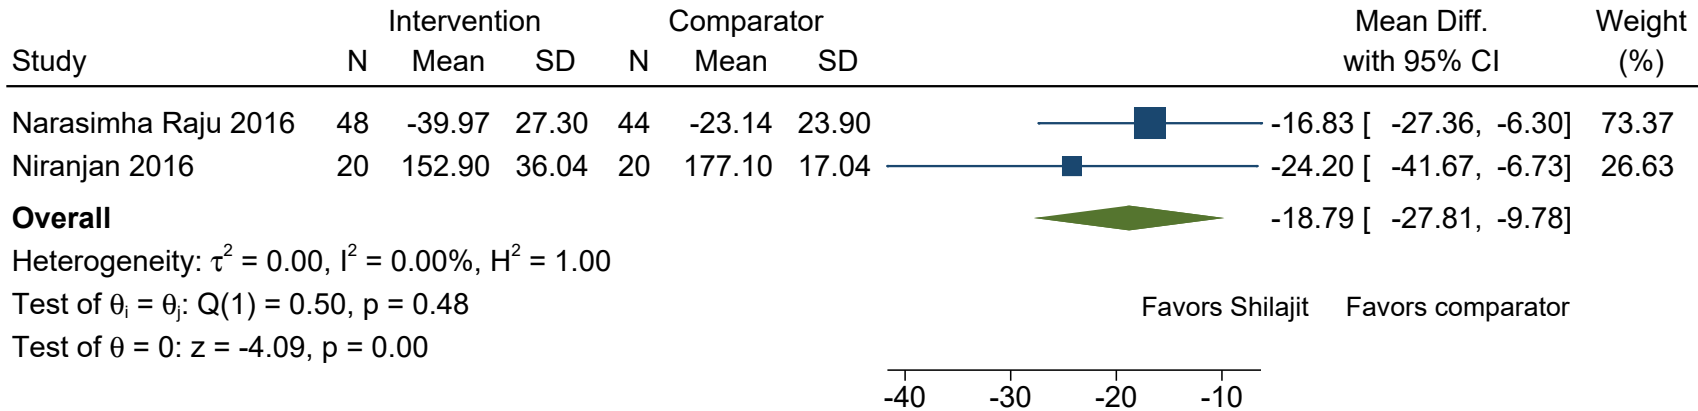

Random-effects REML model

Supplement: Data_Sheet_1.zip [file Data_Sheet_1.zip]

# Aegle marmelos - BMI

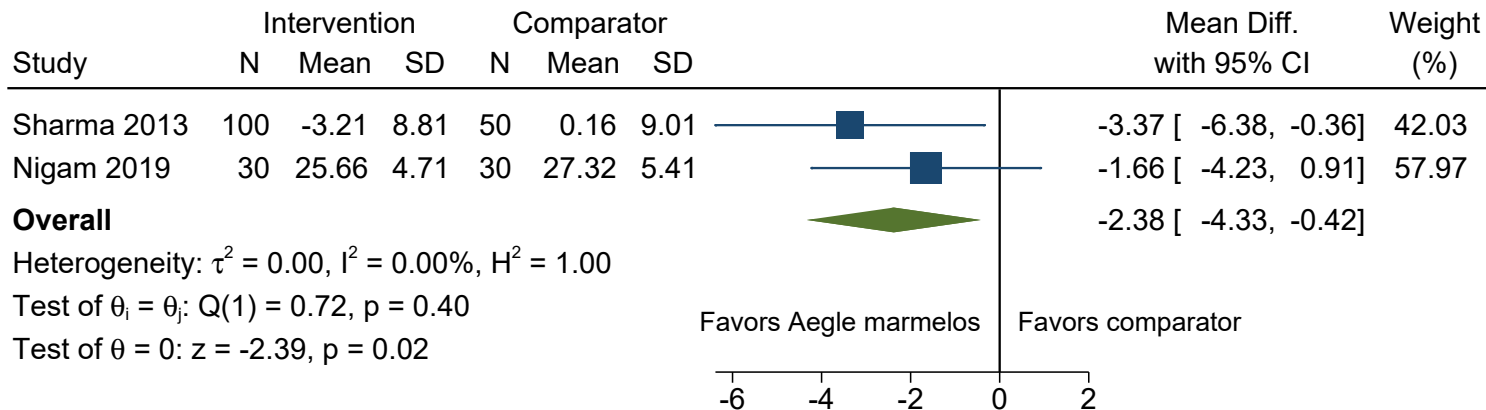

Random-effects REML model

Supplement: Data_Sheet_1.zip [file Data_Sheet_1.zip]

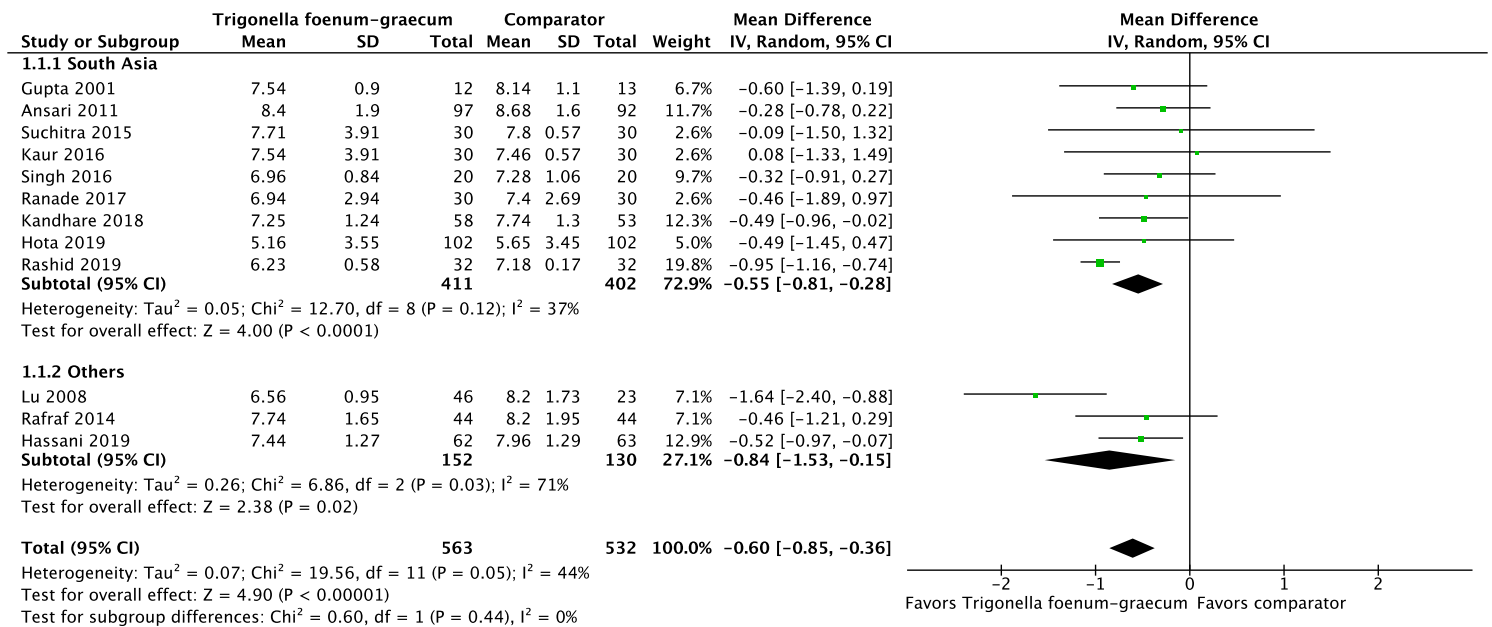

Supplement: Data_Sheet_1.zip [file Data_Sheet_1.zip]

# Momordica charantia - TG

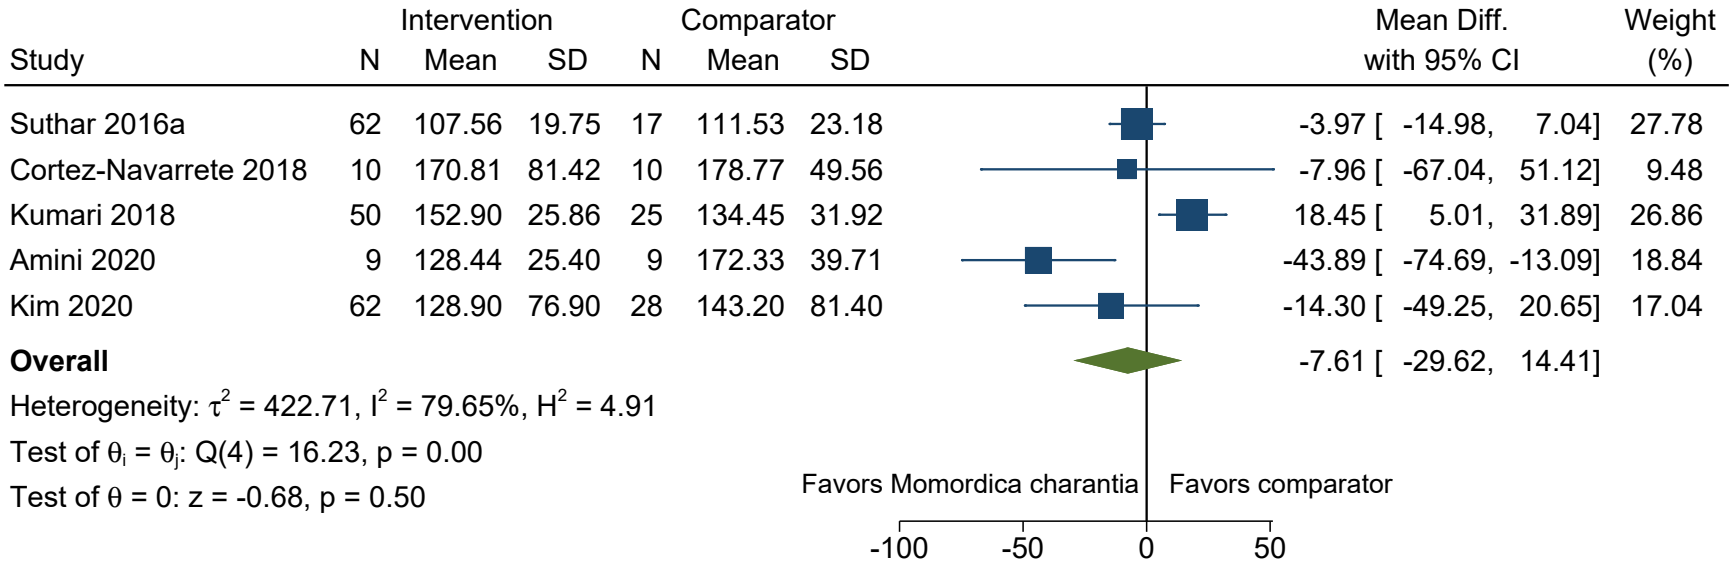

Supplement: Data_Sheet_1.zip [file Data_Sheet_1.zip]

# Elettaria cardamomum - TG

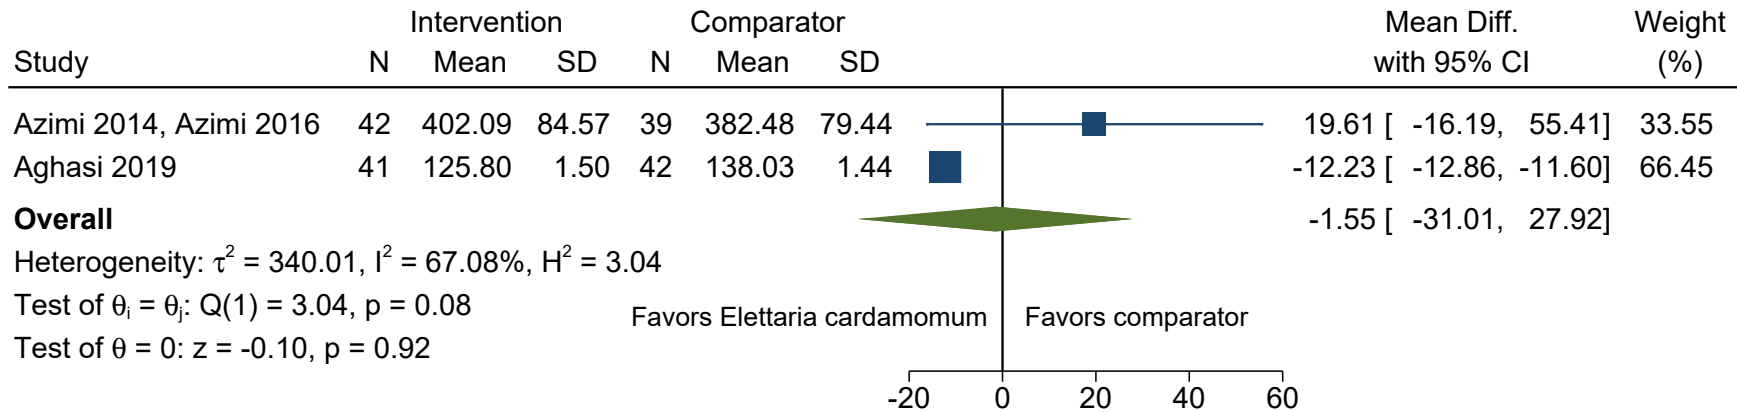

Random-effects REML model

Supplement: Data_Sheet_1.zip [file Data_Sheet_1.zip]

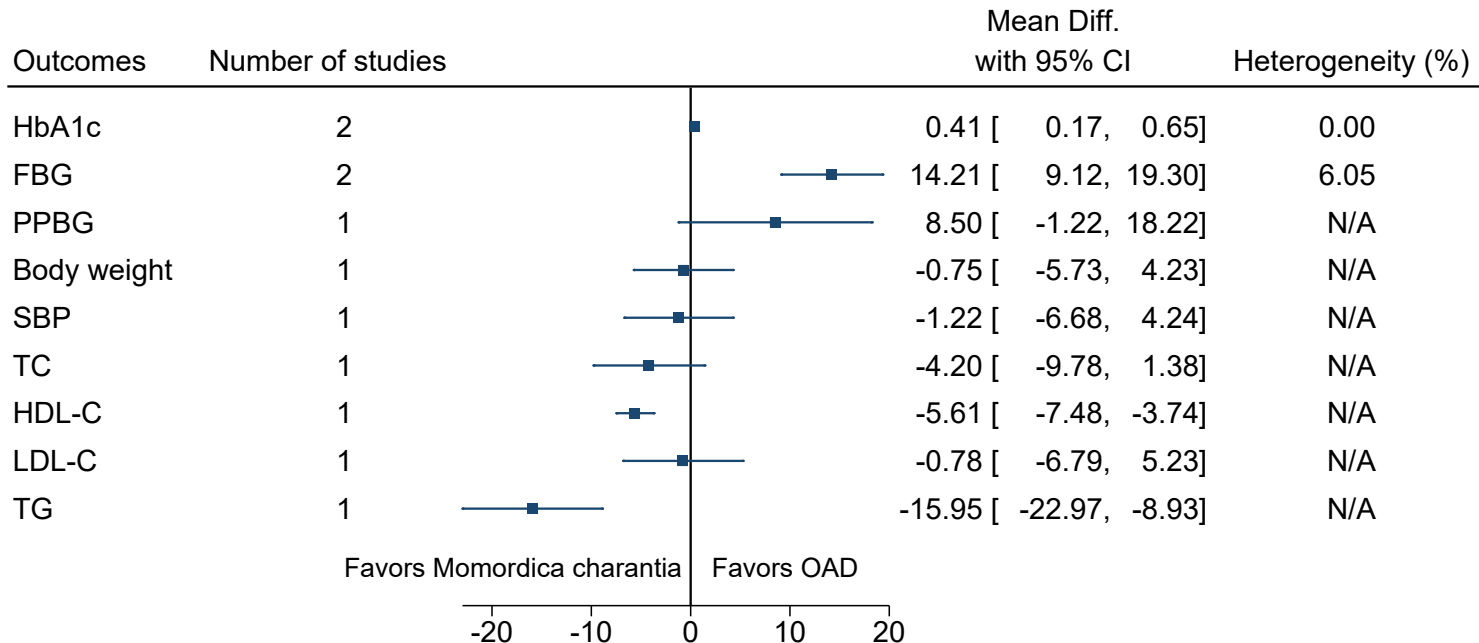

Supplement: Data_Sheet_1.zip [file Data_Sheet_1.zip]

# Anethum graveolens - Fasting insulin

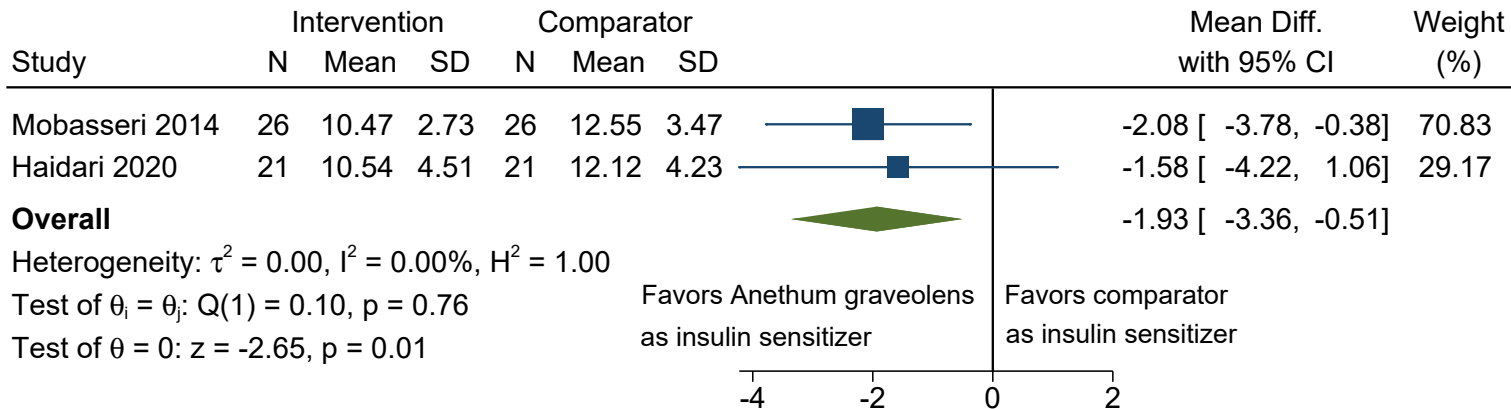

Random-effects REML model

Supplement: Data_Sheet_1.zip [file Data_Sheet_1.zip]

# Aloe vera - HDL-C

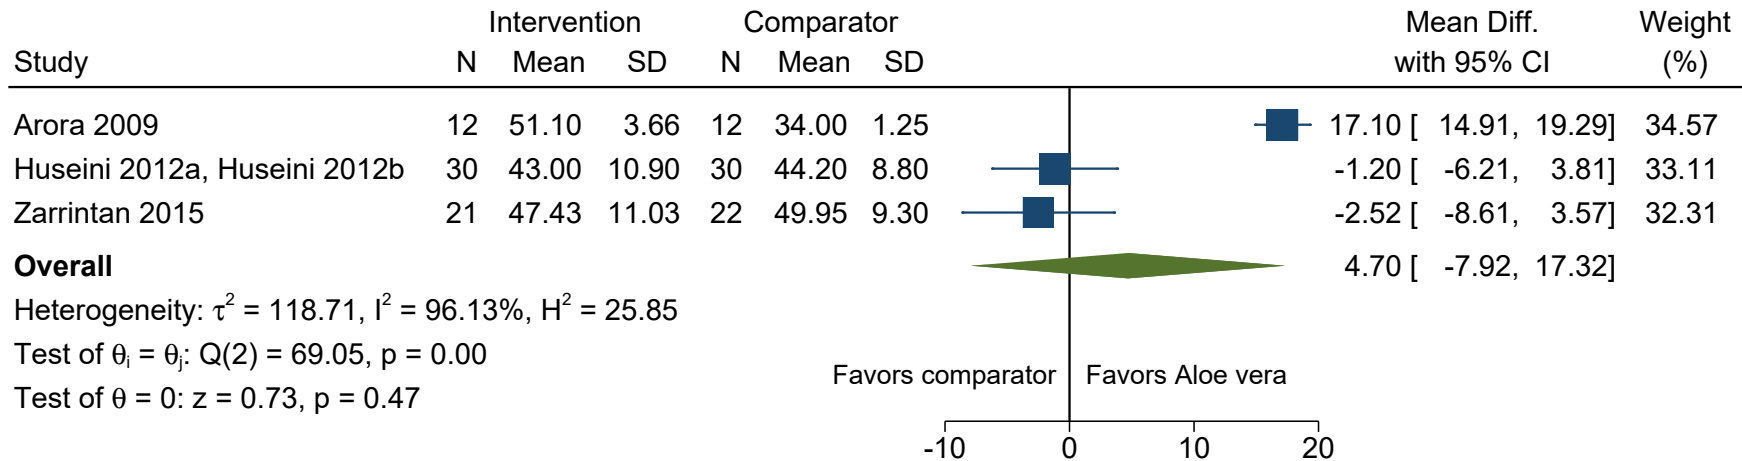

Supplement: Data_Sheet_1.zip [file Data_Sheet_1.zip]

# Syzygium cumini - FBG

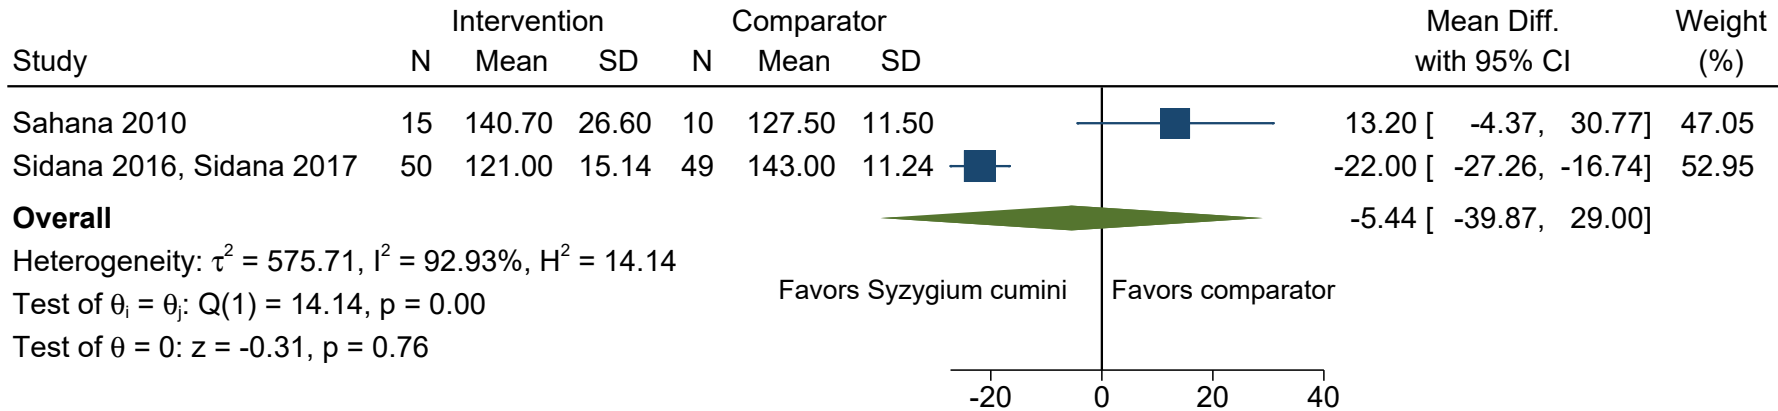

Random-effects REML model

Supplement: Data_Sheet_1.zip [file Data_Sheet_1.zip]

# Boswellia serrata - TG

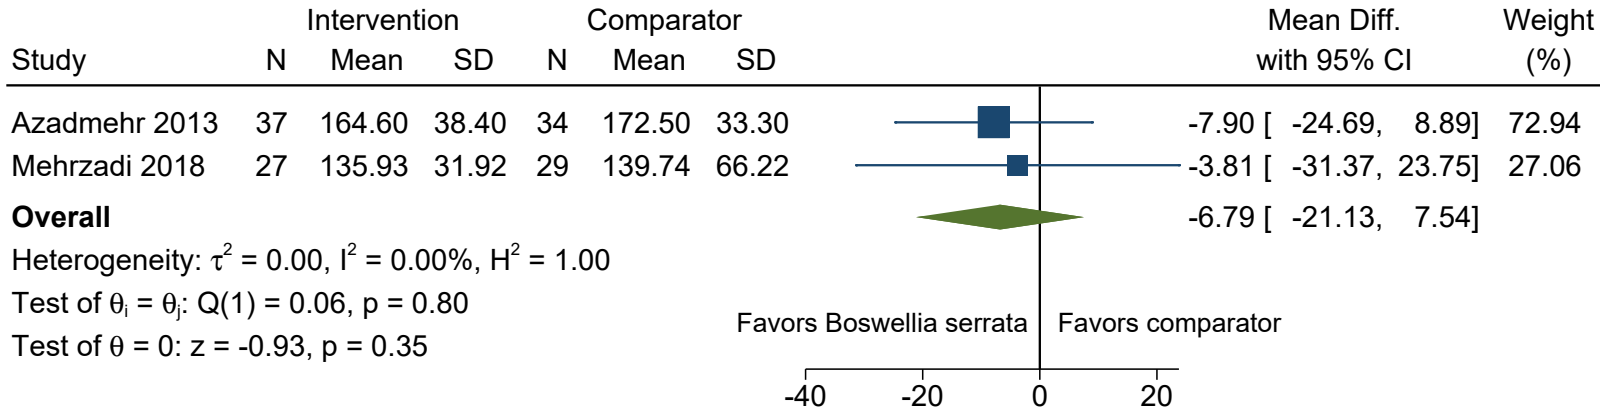

Random-effects REML model

Supplement: Data_Sheet_1.zip [file Data_Sheet_1.zip]

# Crocus sativus - HbA1c

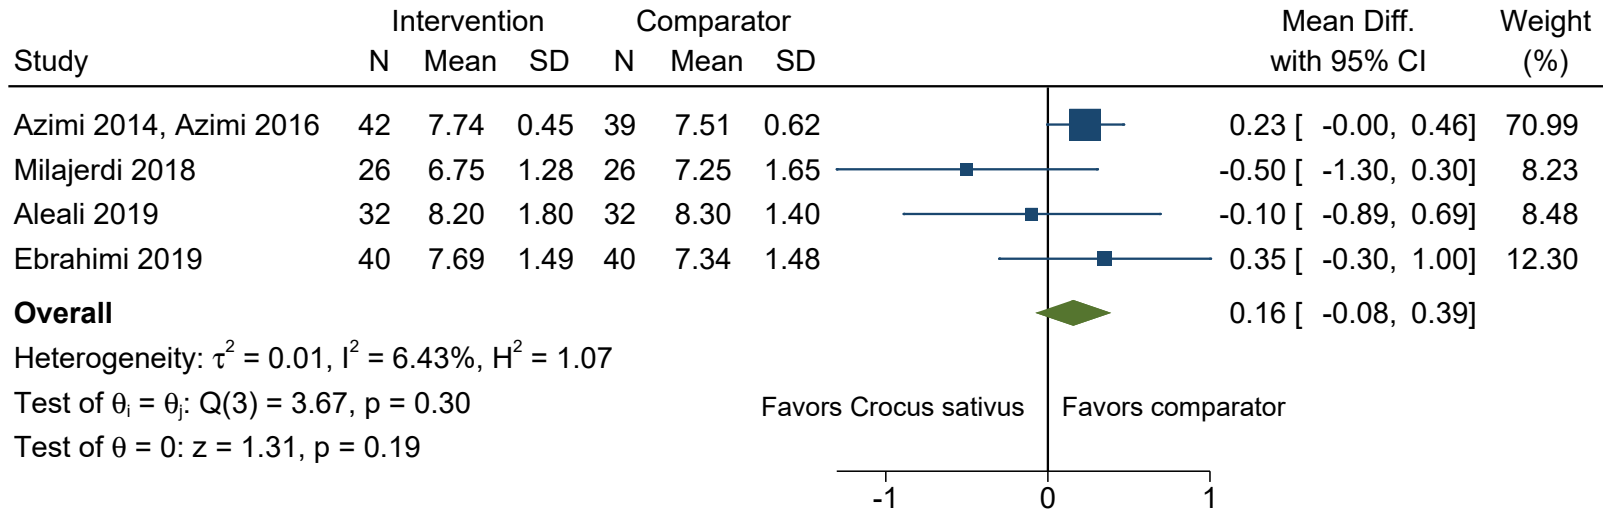

Random-effects REML model

Supplement: Data_Sheet_1.zip [file Data_Sheet_1.zip]

# Pterocarpus marsupium - PPBG

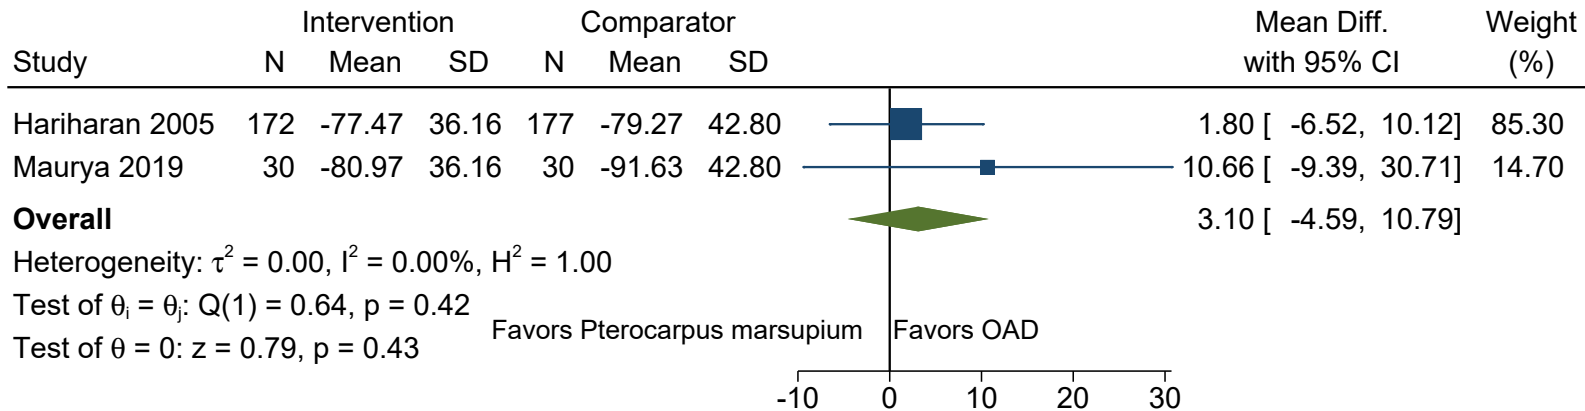

Random-effects REML model

Supplement: Data_Sheet_1.zip [file Data_Sheet_1.zip]

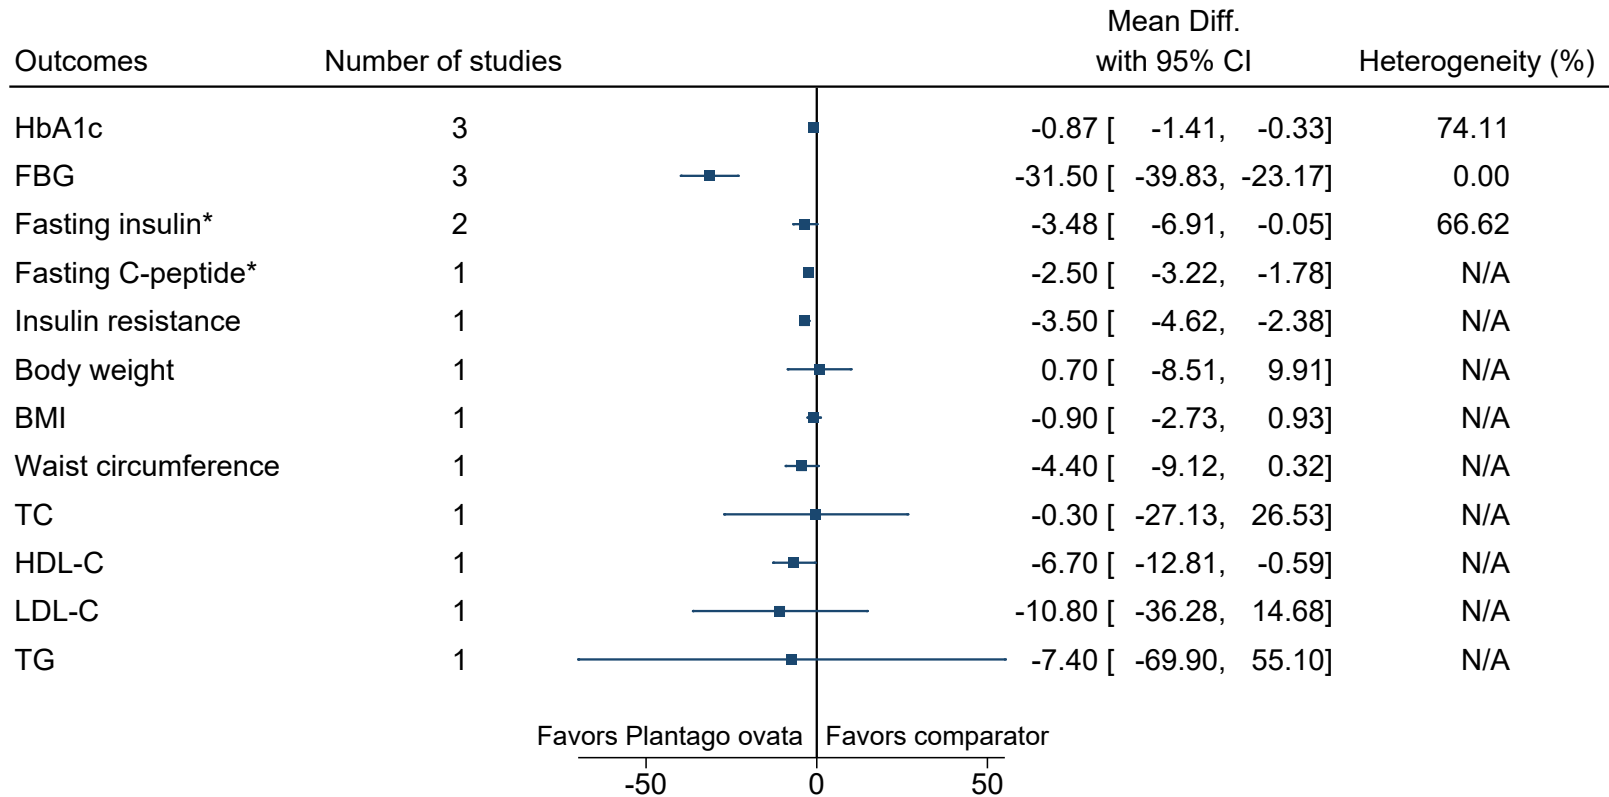

\*Favors intervention/comparator as insulin sensitizer

Supplement: Data_Sheet_1.zip [file Data_Sheet_1.zip]

# Nigella sativa - PPBG

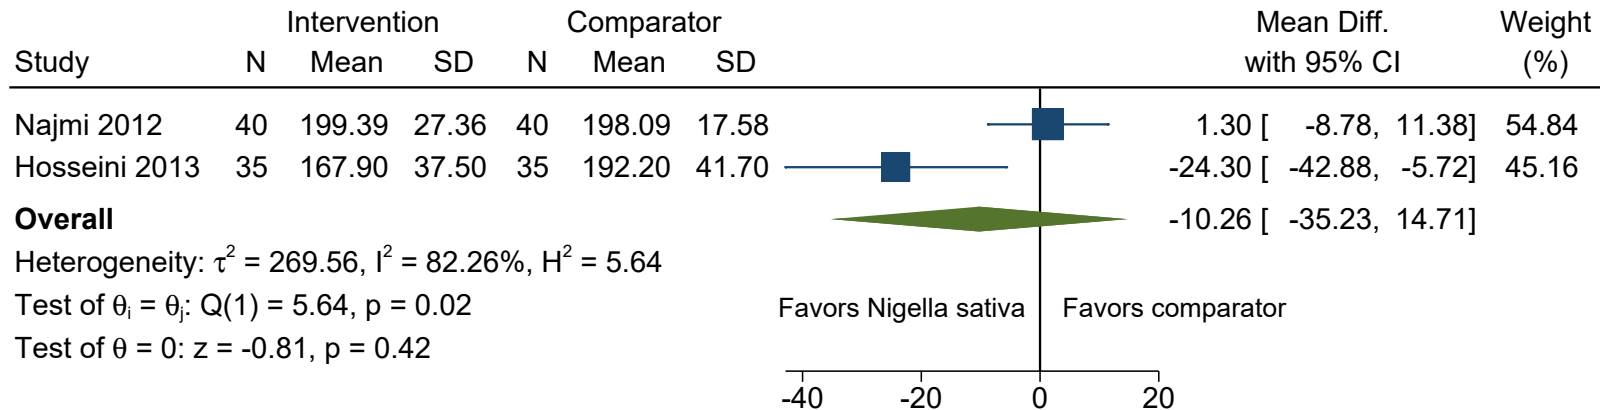

Random-effects REML model

Supplement: Data_Sheet_1.zip [file Data_Sheet_1.zip]

# Coccinia grandis - TG

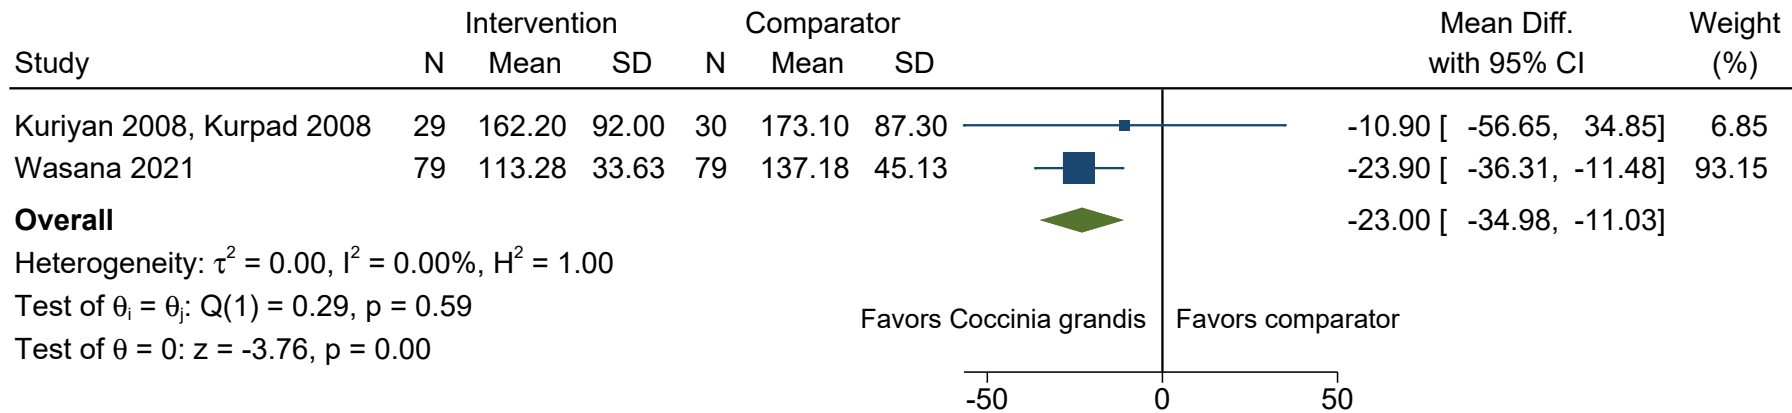

Random-effects REML model

Supplement: Data_Sheet_1.zip [file Data_Sheet_1.zip]

# Allium sativum - FBG

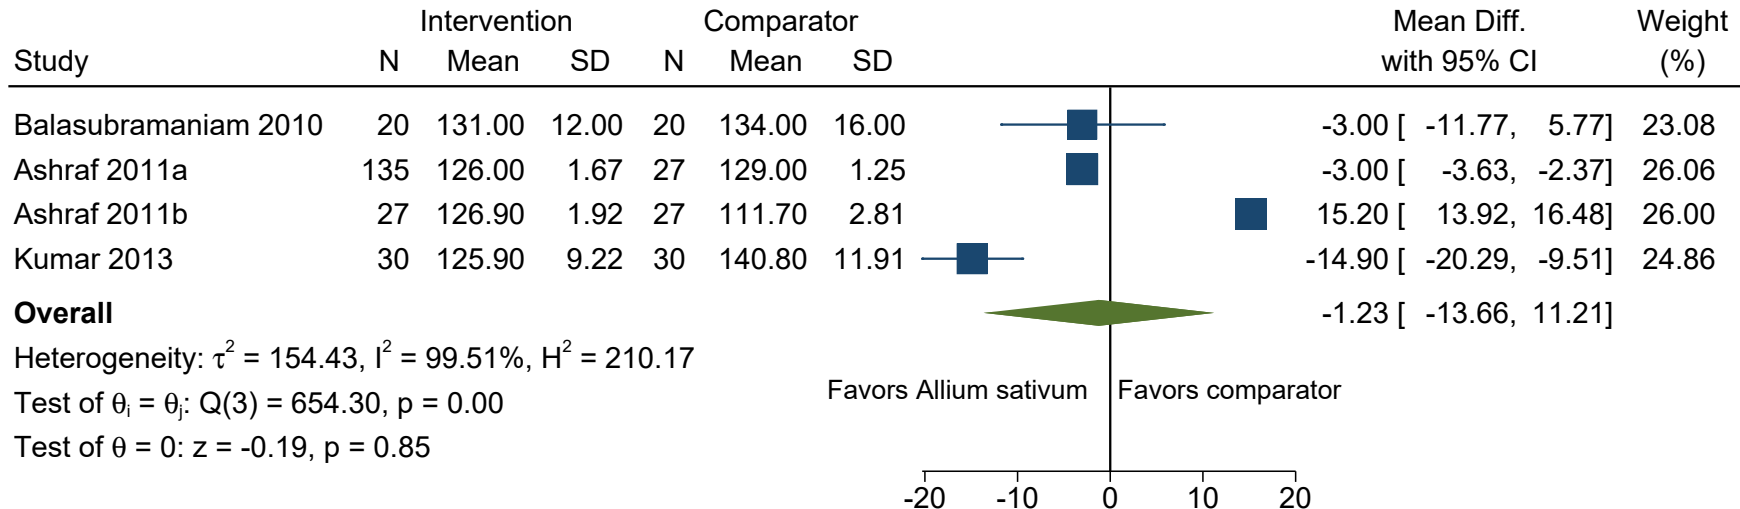

Random-effects REML model

Supplement: Data_Sheet_1.zip [file Data_Sheet_1.zip]

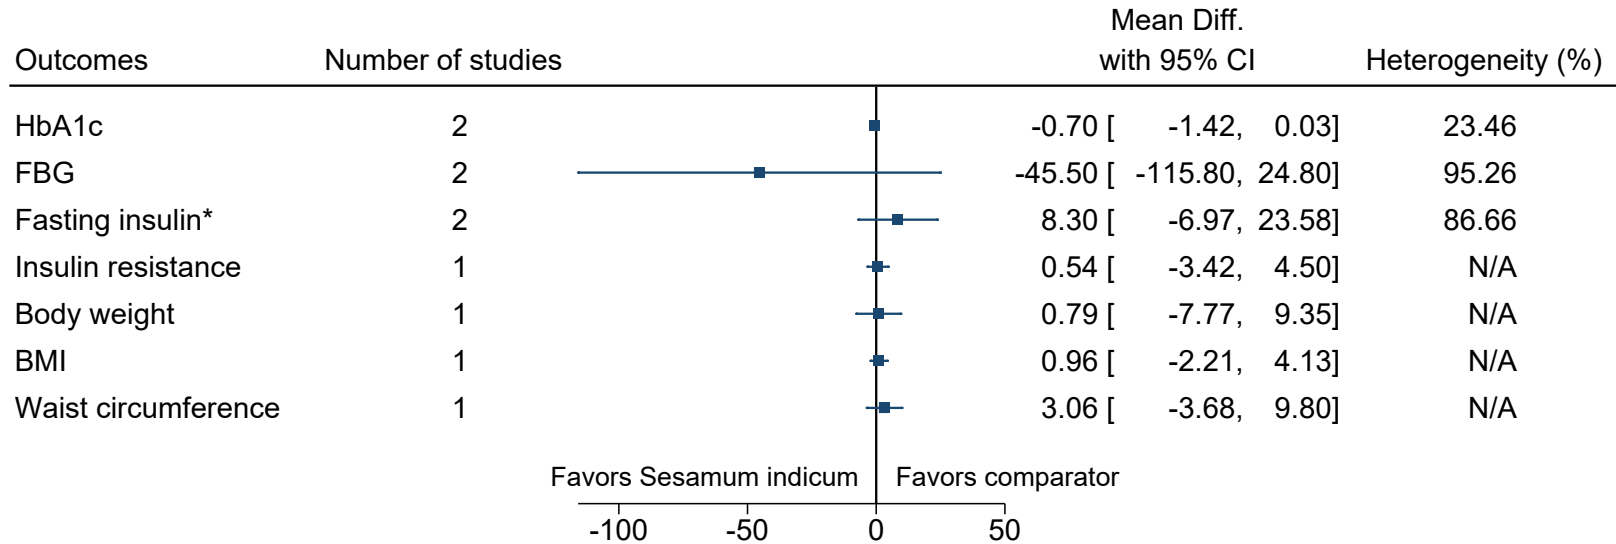

\*Favors intervention/comparator as insulin sensitizer

Supplement: Data_Sheet_1.zip [file Data_Sheet_1.zip]

# Zingiber officinale - Body weight

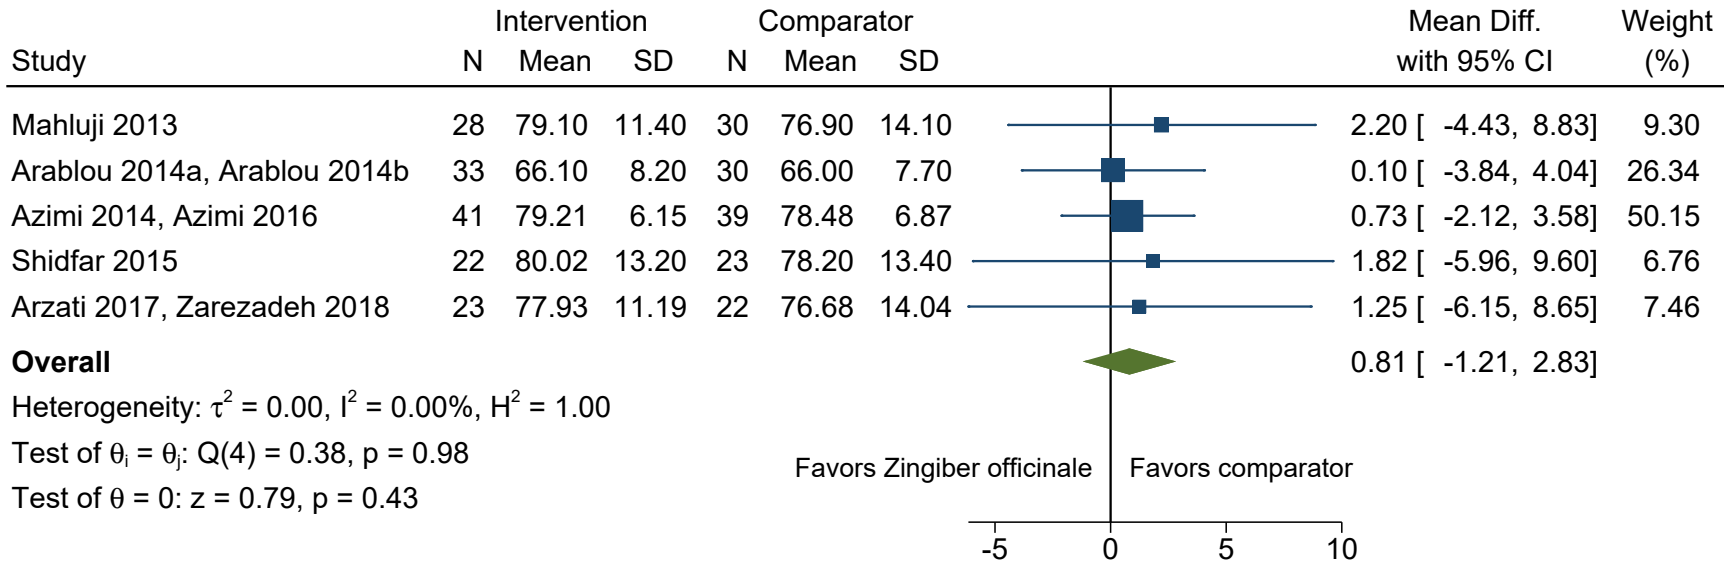

Supplement: Data_Sheet_1.zip [file Data_Sheet_1.zip]

# Gynostemma pentaphyllum - Body weight

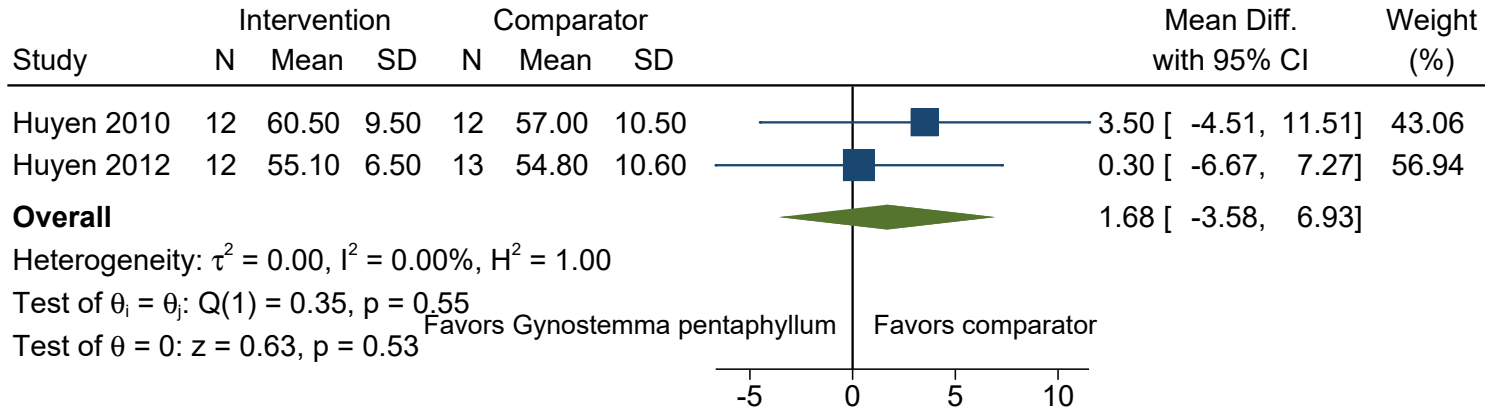

Random-effects REML model

Supplement: Data_Sheet_1.zip [file Data_Sheet_1.zip]

# Nigella sativa - HbA1c

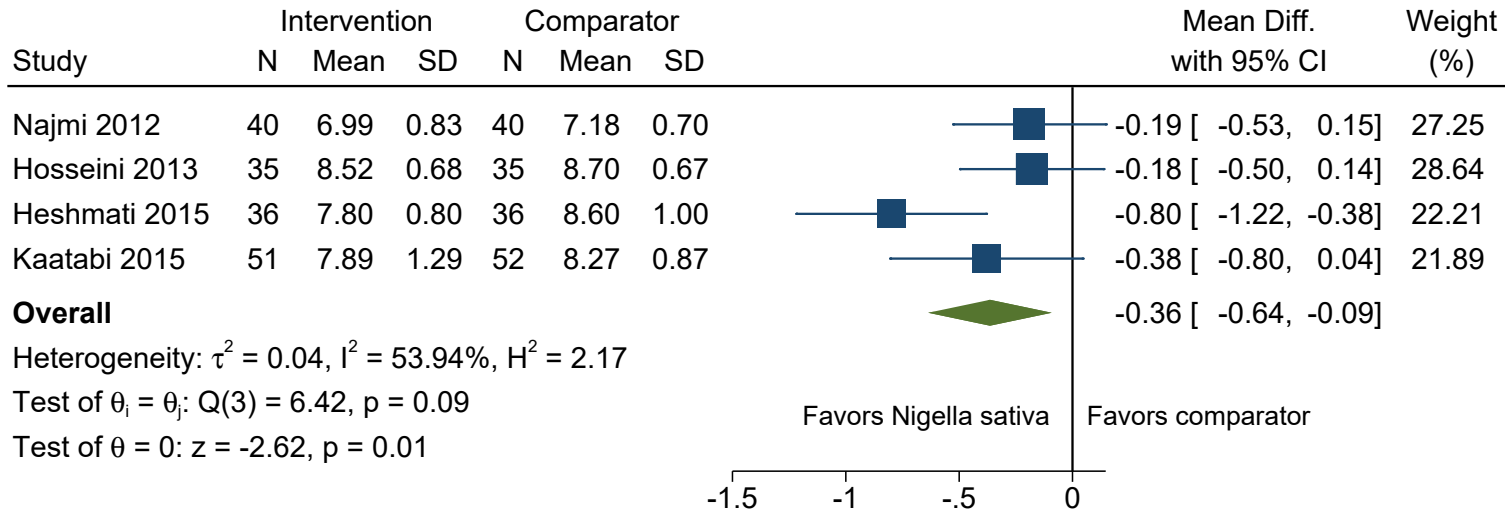

Random-effects REML model

Supplement: Data_Sheet_1.zip [file Data_Sheet_1.zip]

# Trigonella foenum-graecum - FBG

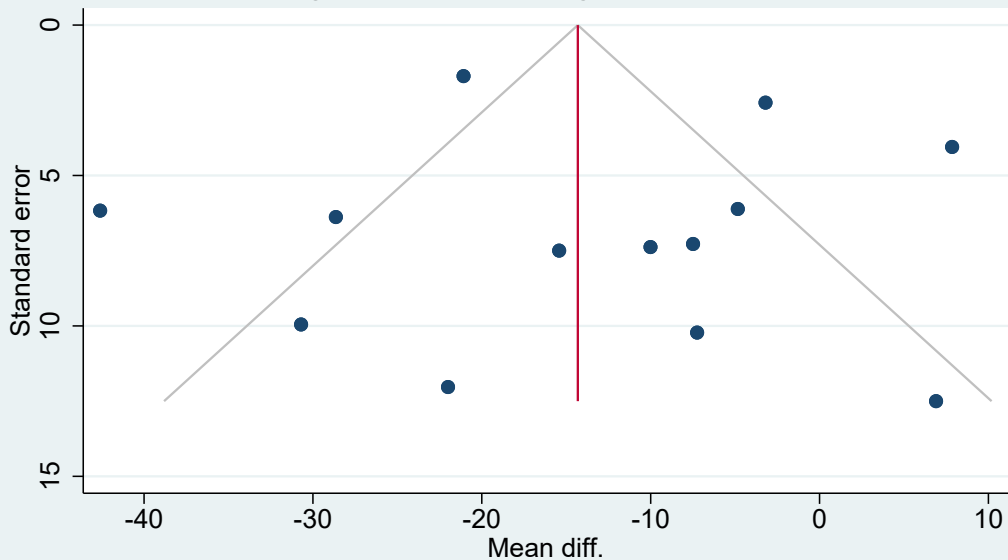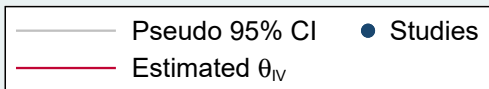

Supplement: Data_Sheet_1.zip [file Data_Sheet_1.zip]

# Coccinia grandis - TC

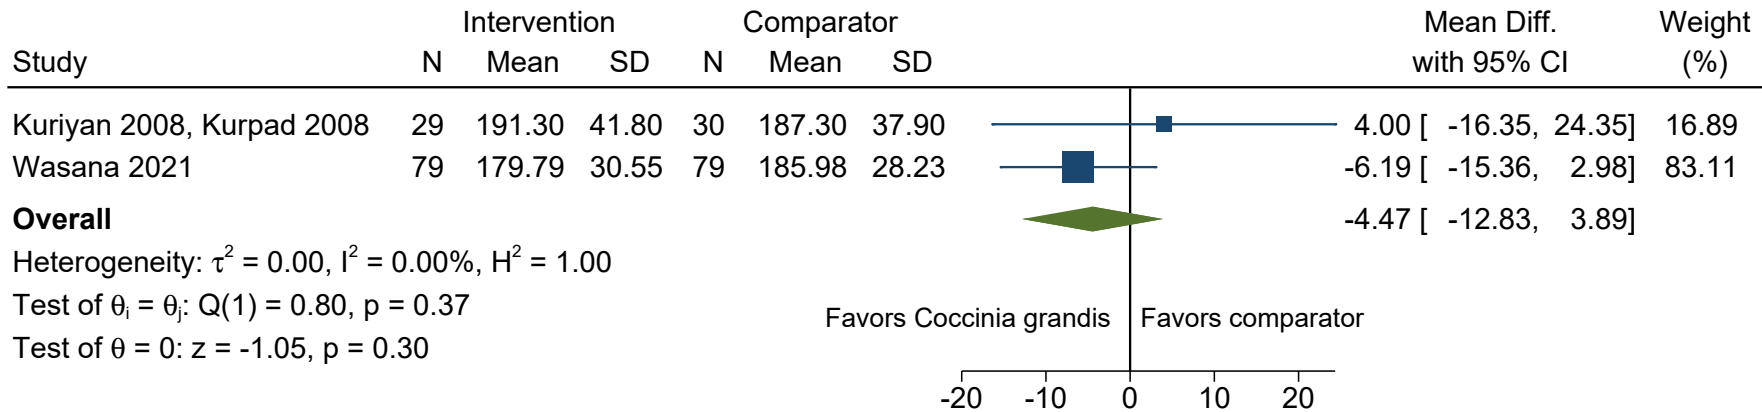

Random-effects REML model

Supplement: Data_Sheet_1.zip [file Data_Sheet_1.zip]

# Cyamopsis tetragonoloba - Body weight

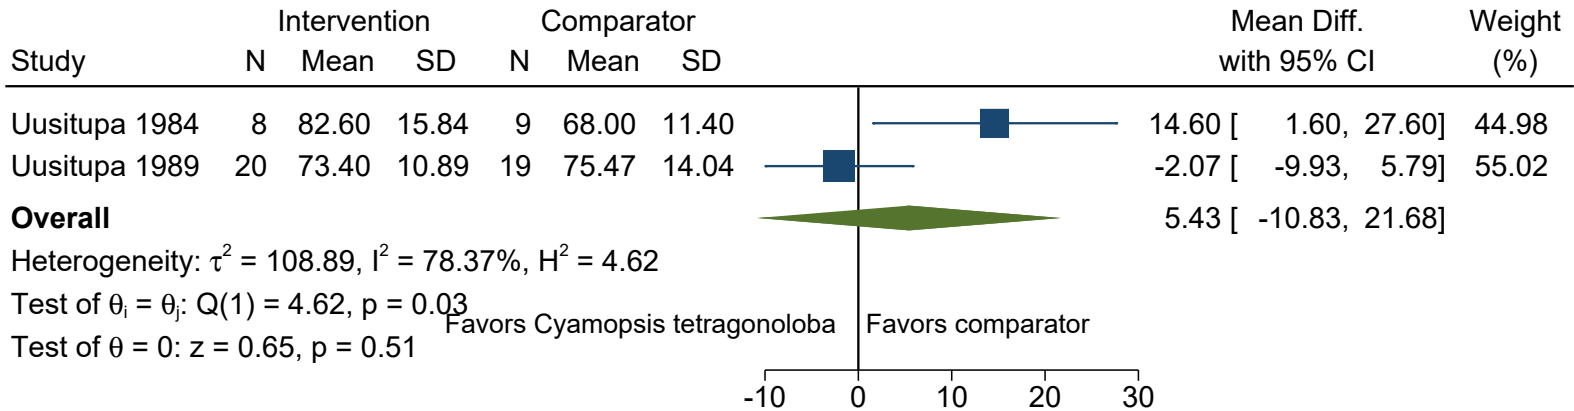

Random-effects REML model

Supplement: Data_Sheet_1.zip [file Data_Sheet_1.zip]

# Tinospora cordifolia - LDL-C

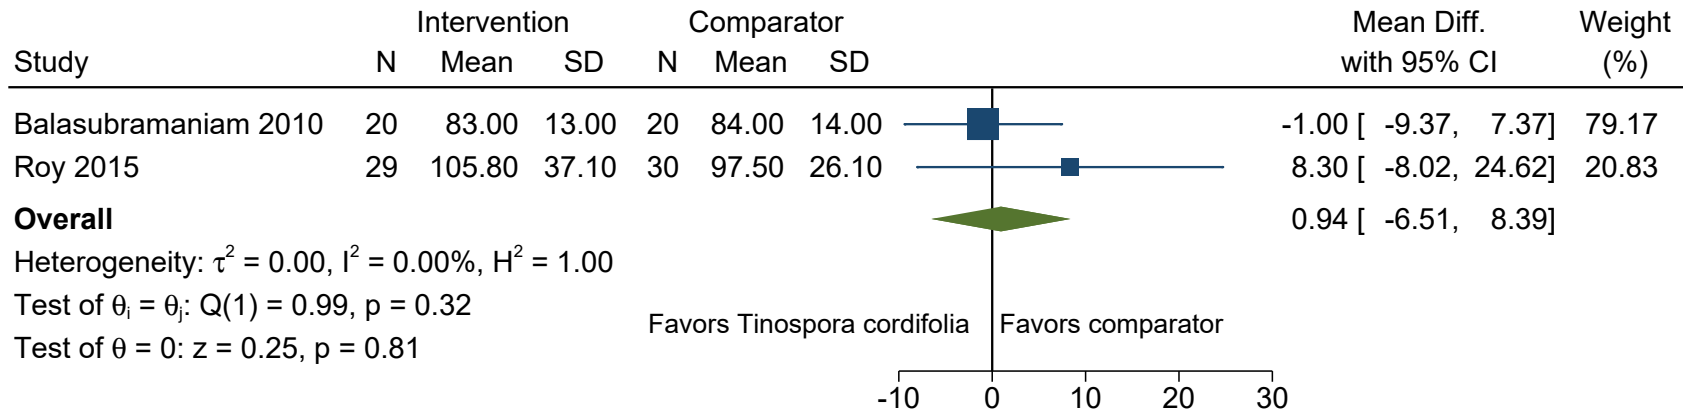

Random-effects REML model

Supplement: Data_Sheet_1.zip [file Data_Sheet_1.zip]

# Sesamum indicum - HbA1c

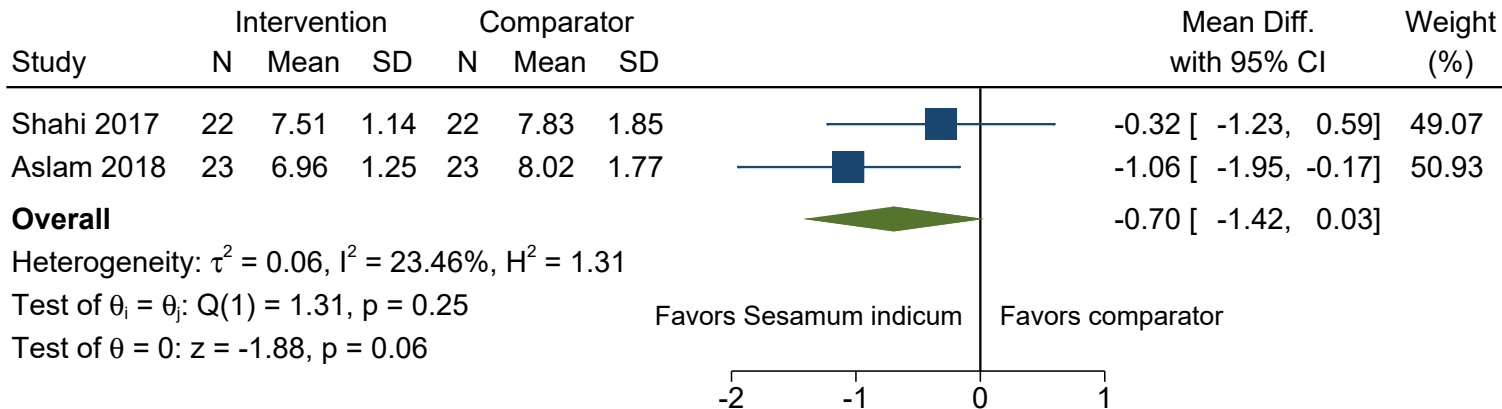

Random-effects REML model

Supplement: Data_Sheet_1.zip [file Data_Sheet_1.zip]

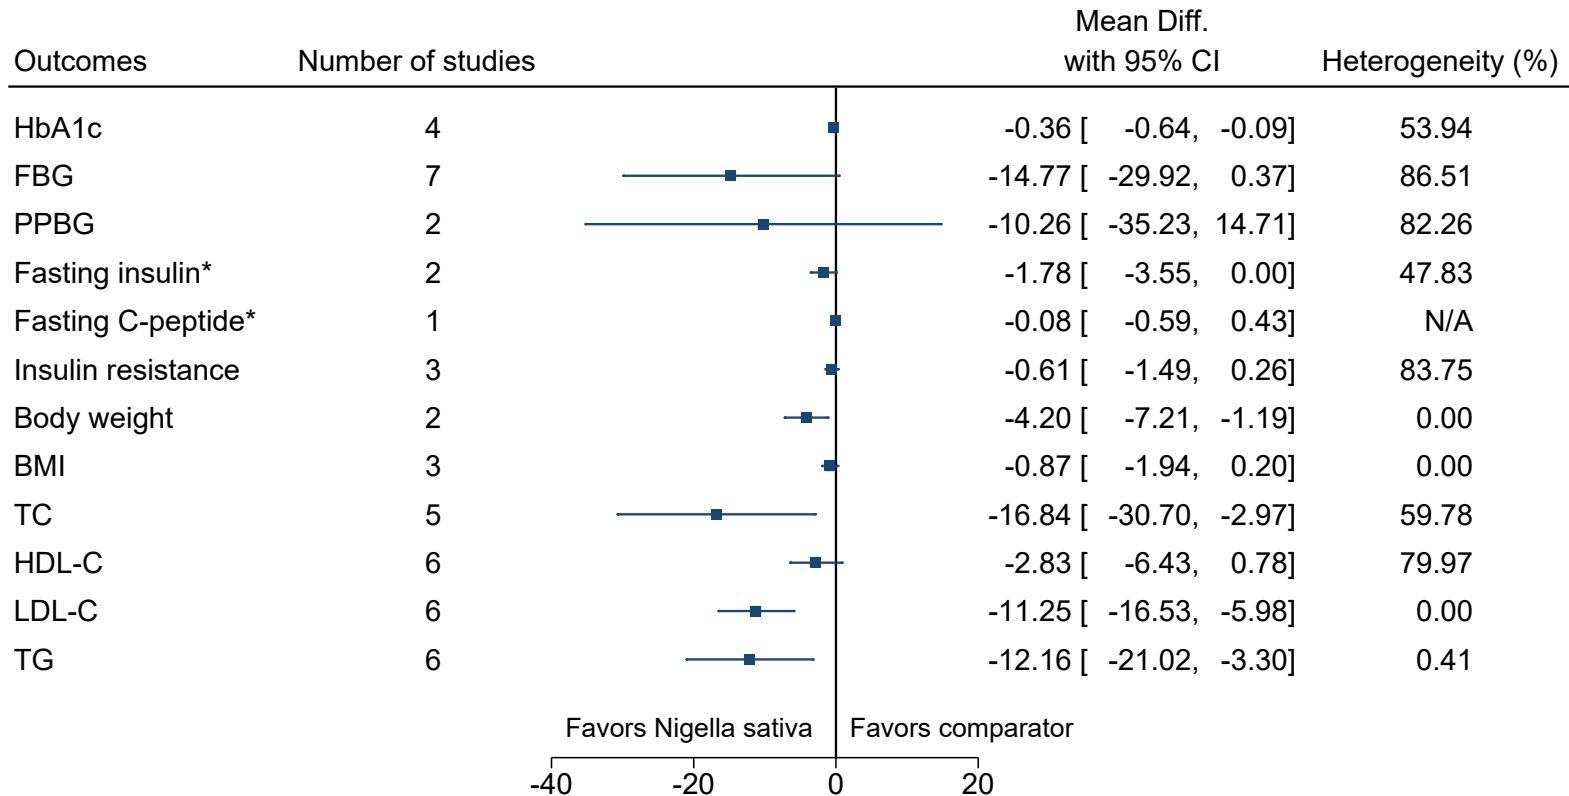

\*Favors intervention/comparator as insulin sensitizer

Supplement: Data_Sheet_1.zip [file Data_Sheet_1.zip]

# Trigonella foenum-graecum - HDL-C

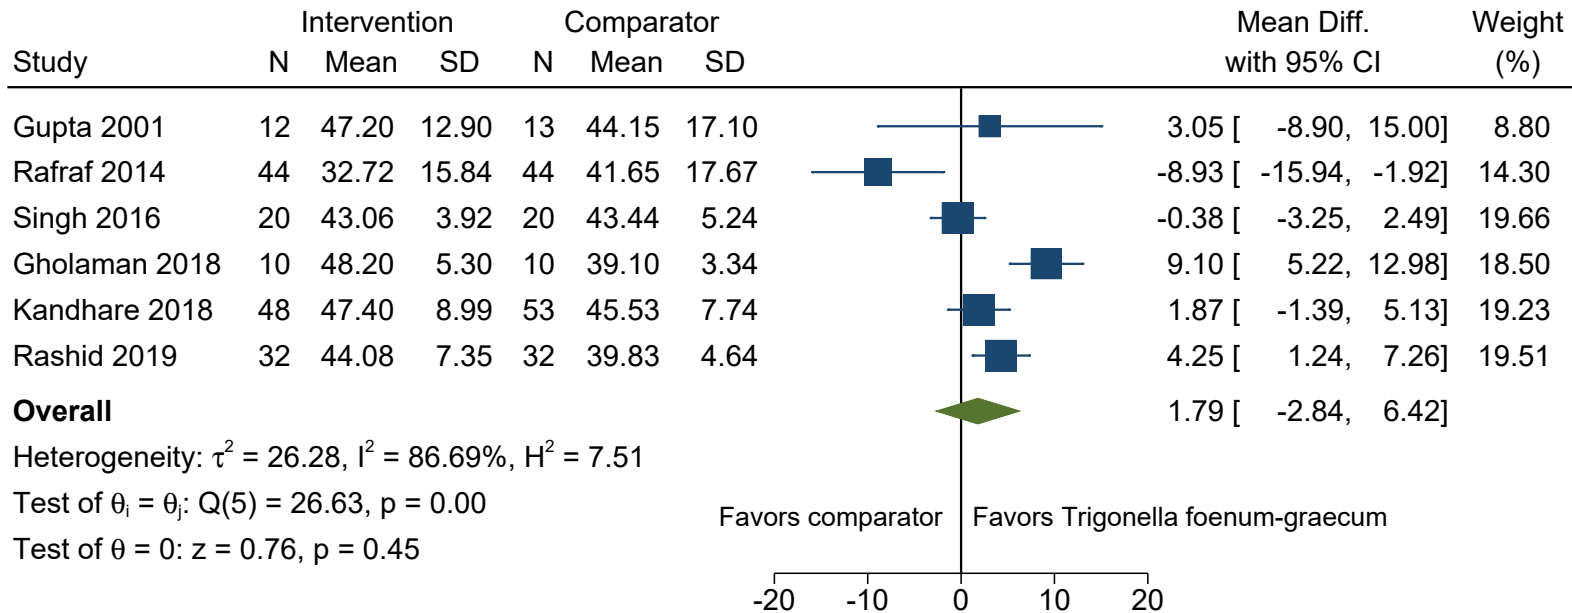

Supplement: Data_Sheet_1.zip [file Data_Sheet_1.zip]

# Urtica dioica - DBP

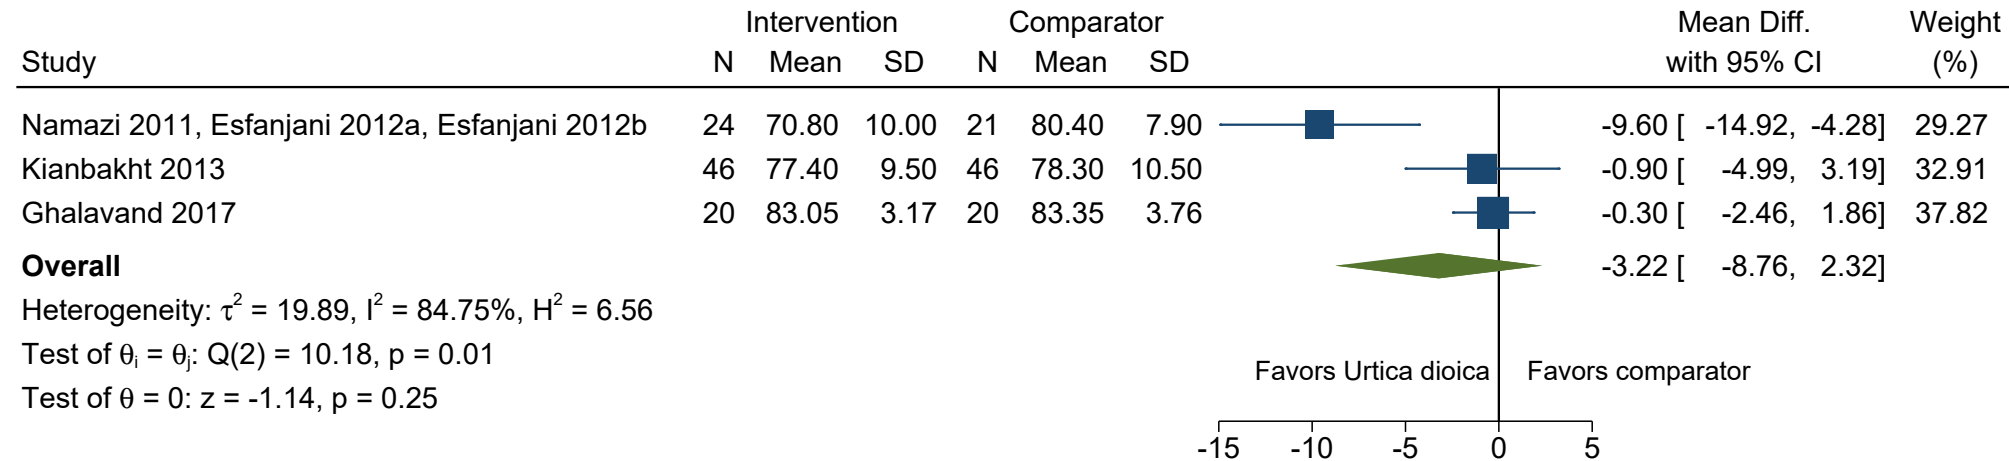

Supplement: Data_Sheet_1.zip [file Data_Sheet_1.zip]

# Trigonella foenum-graecum - HbA1c

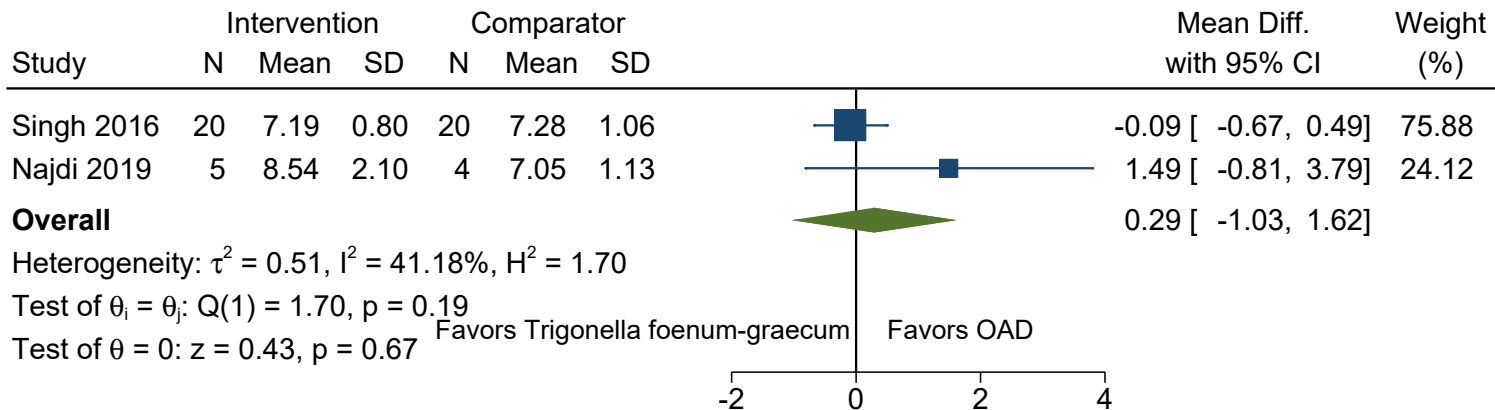

Random-effects REML model

Supplement: Data_Sheet_1.zip [file Data_Sheet_1.zip]

# Cinnamomum verum - Body weight

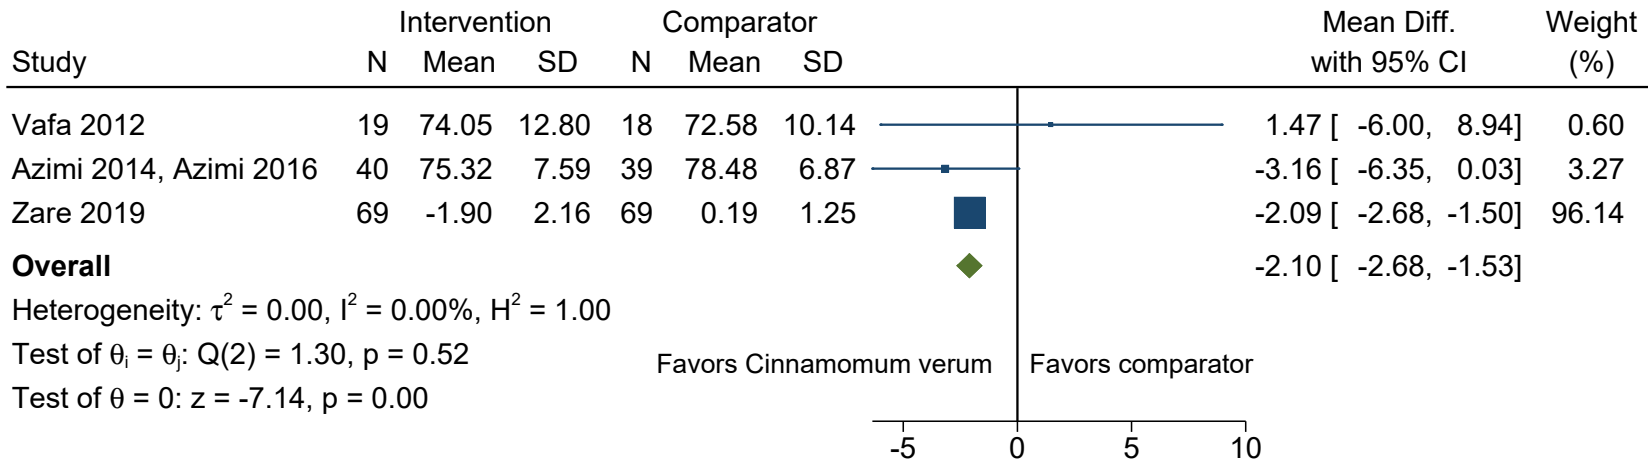

Random-effects REML model

Supplement: Data_Sheet_1.zip [file Data_Sheet_1.zip]

# Sesamum indicum - FBG

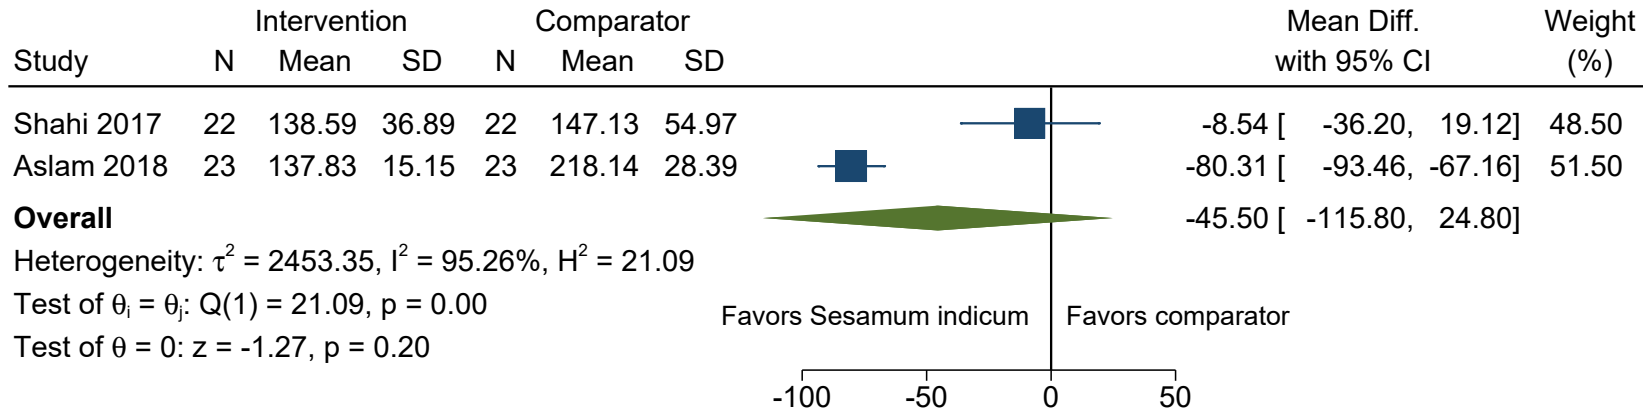

Random-effects REML model

Supplement: Data_Sheet_1.zip [file Data_Sheet_1.zip]

# Camellia sinensis - BMI

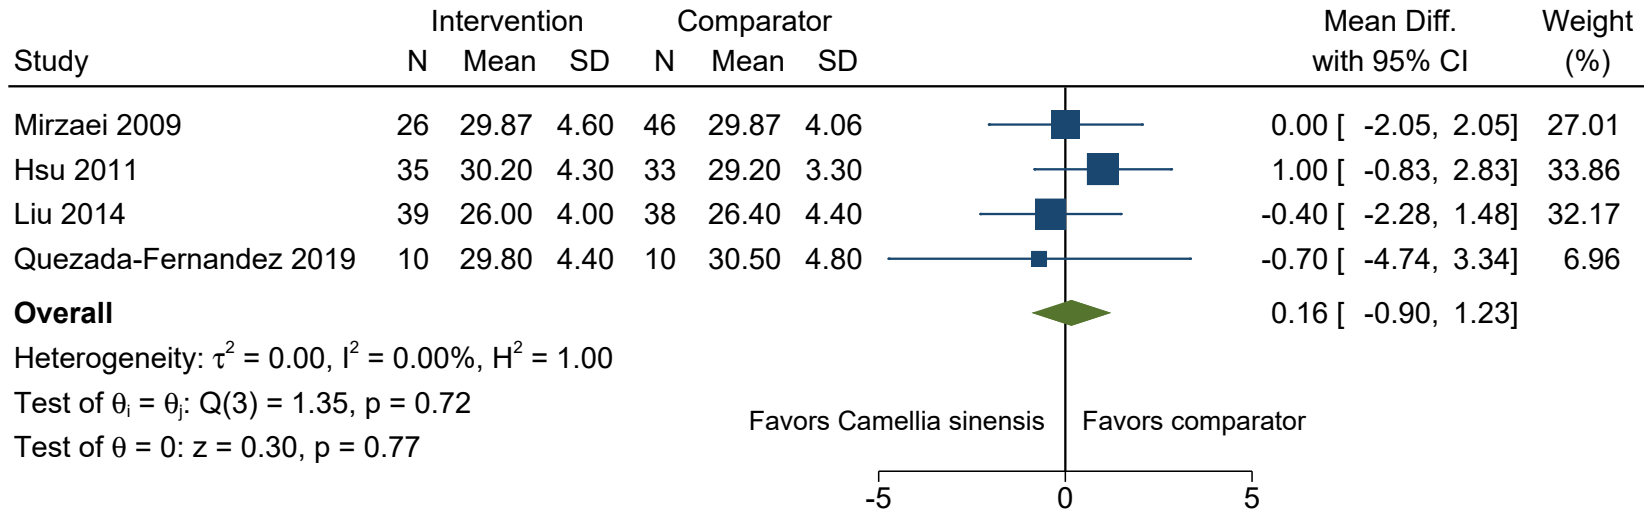

Random-effects REML model

Supplement: Data_Sheet_1.zip [file Data_Sheet_1.zip]

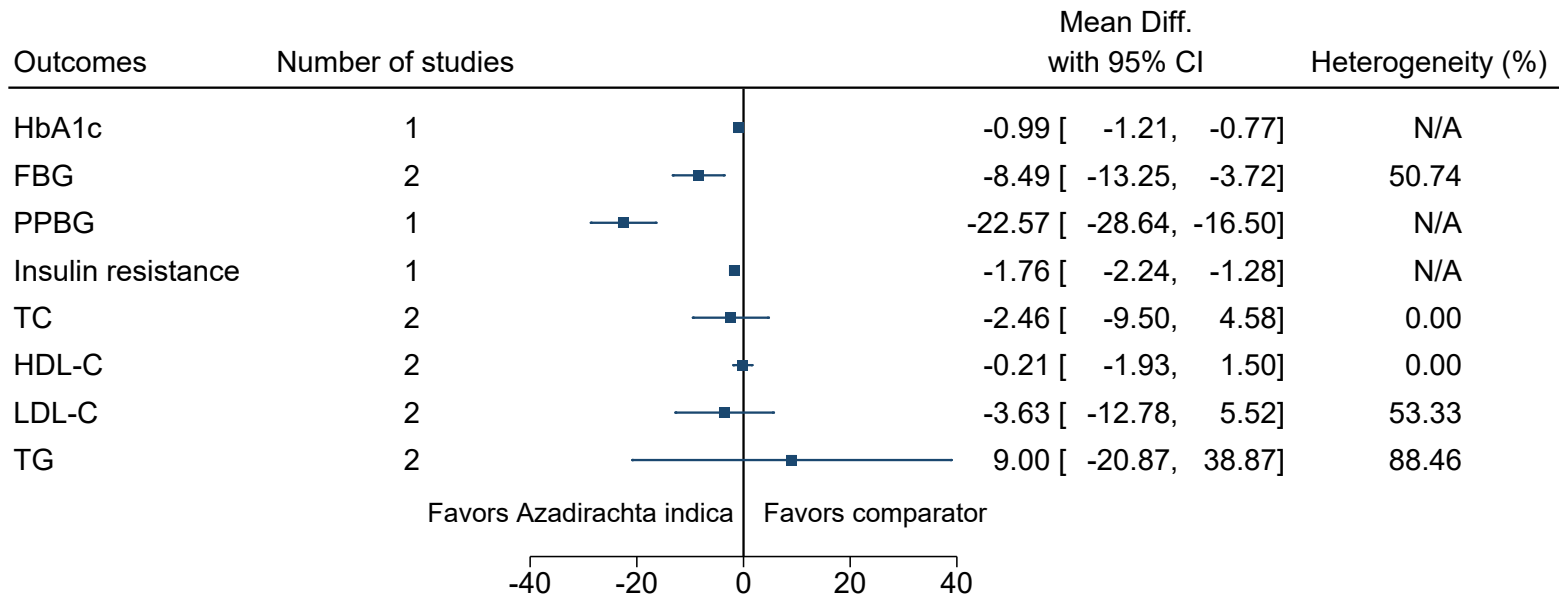

Supplement: Data_Sheet_1.zip [file Data_Sheet_1.zip]

# Punica granatum - Body weight

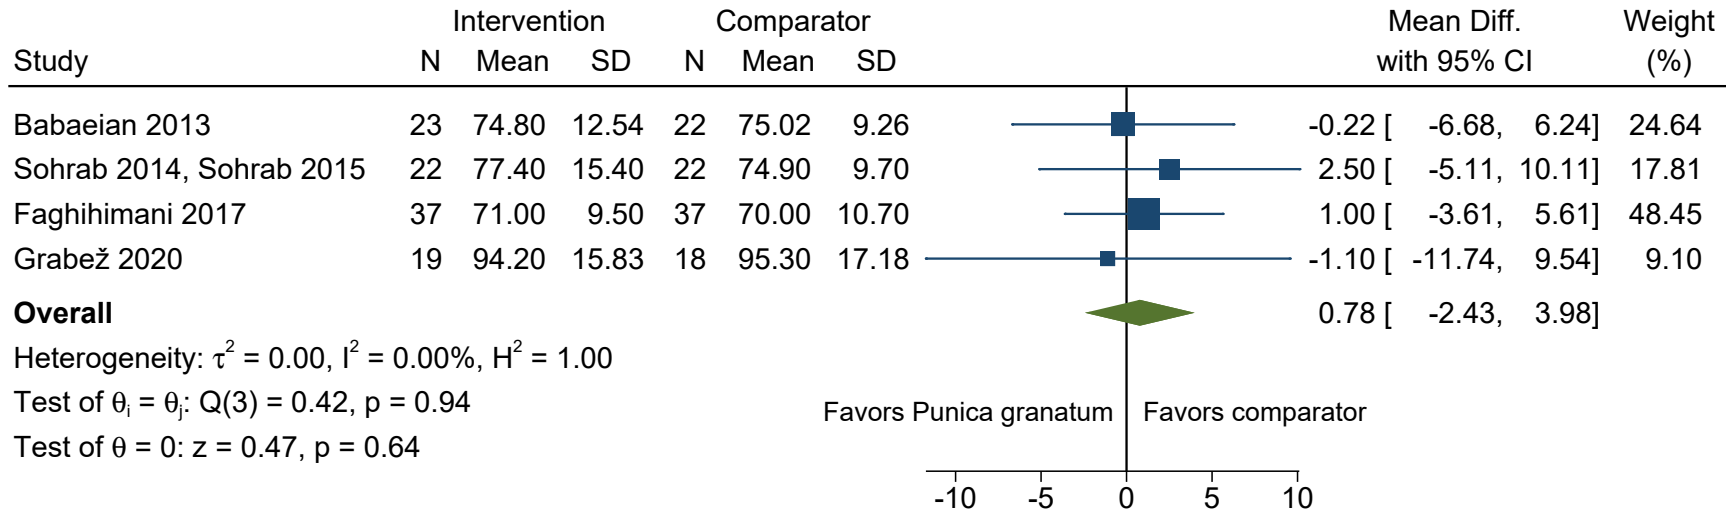

Random-effects REML model

Supplement: Data_Sheet_1.zip [file Data_Sheet_1.zip]

# Gynostemma pentaphyllum - PPBG

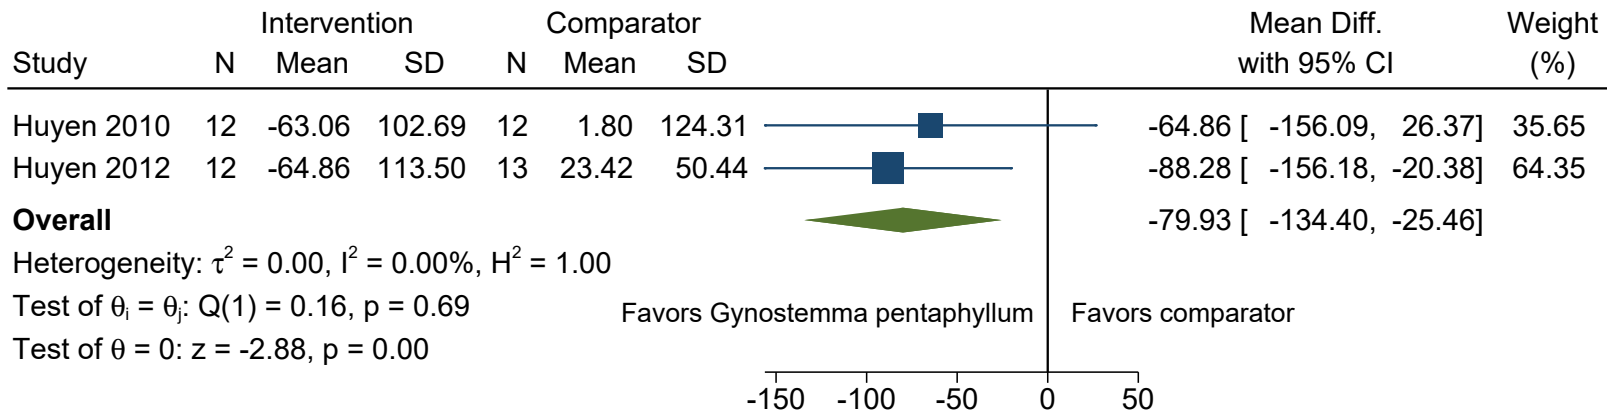

Random-effects REML model

Supplement: Data_Sheet_1.zip [file Data_Sheet_1.zip]

# Momordica charantia - FBG

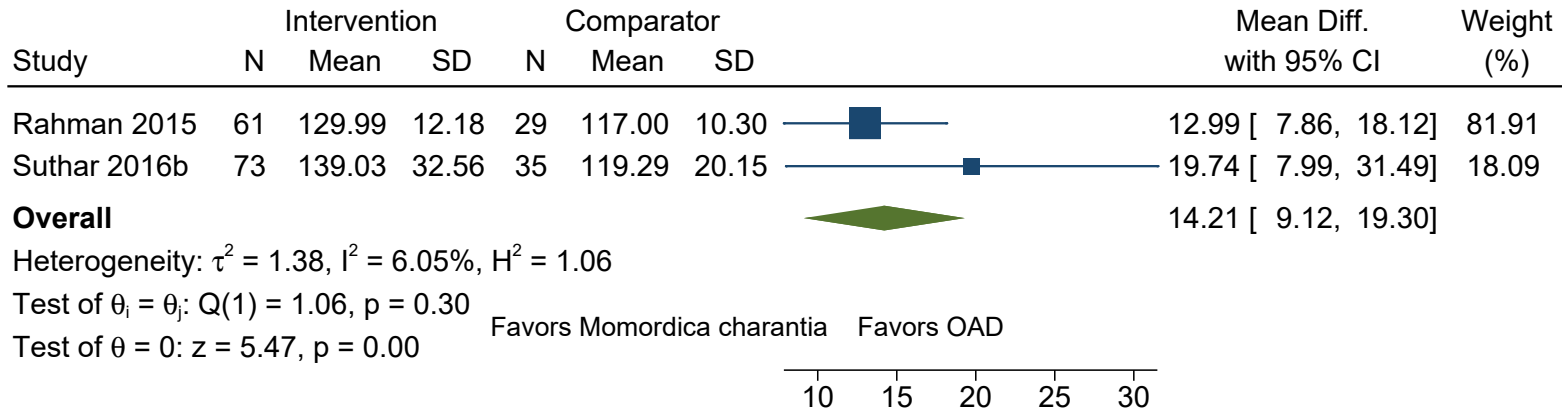

Random-effects REML model

Supplement: Data_Sheet_1.zip [file Data_Sheet_1.zip]

# Anethum graveolens - Insulin resistance

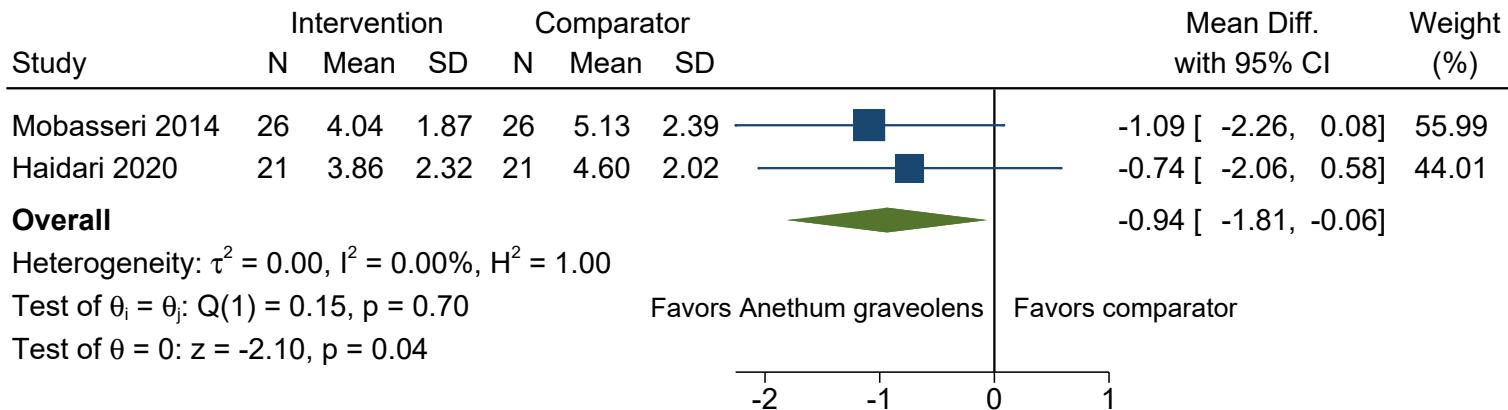

Random-effects REML model

Supplement: Data_Sheet_1.zip [file Data_Sheet_1.zip]

# Momordica charantia - FBG

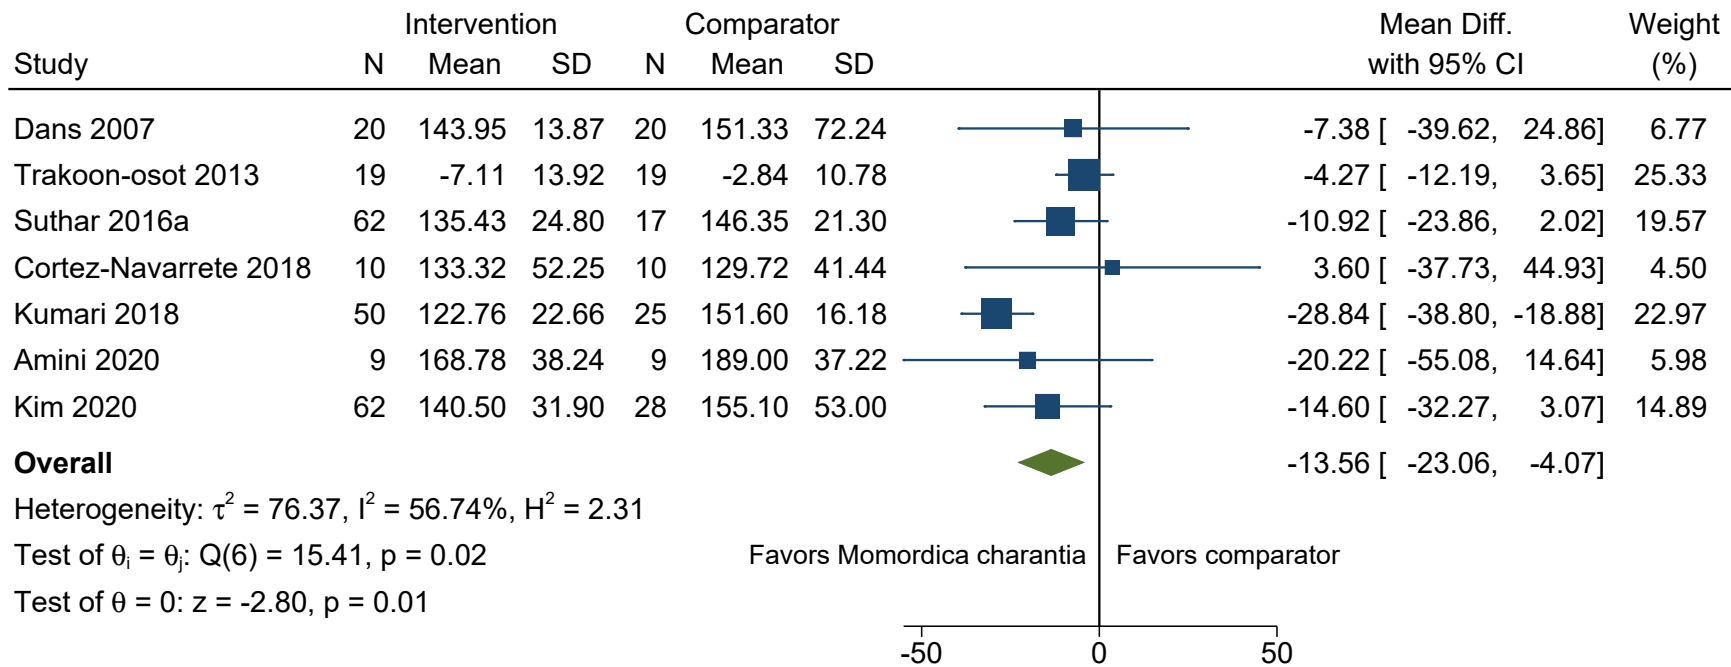

Supplement: Data_Sheet_1.zip [file Data_Sheet_1.zip]

# Gynostemma pentaphyllum - HbA1c

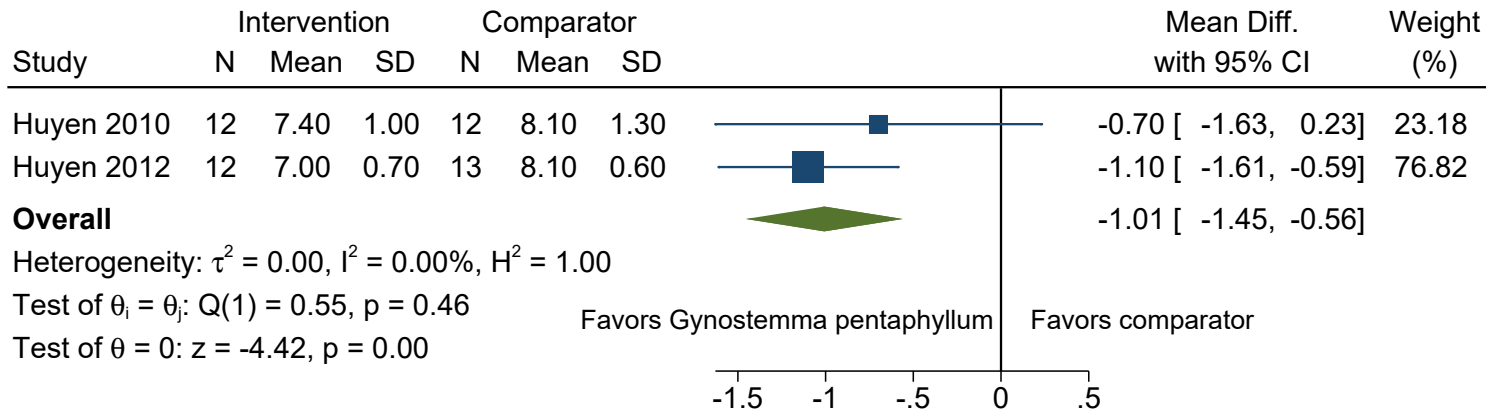

Random-effects REML model

Supplement: Data_Sheet_1.zip [file Data_Sheet_1.zip]

# Camellia sinensis - FBG

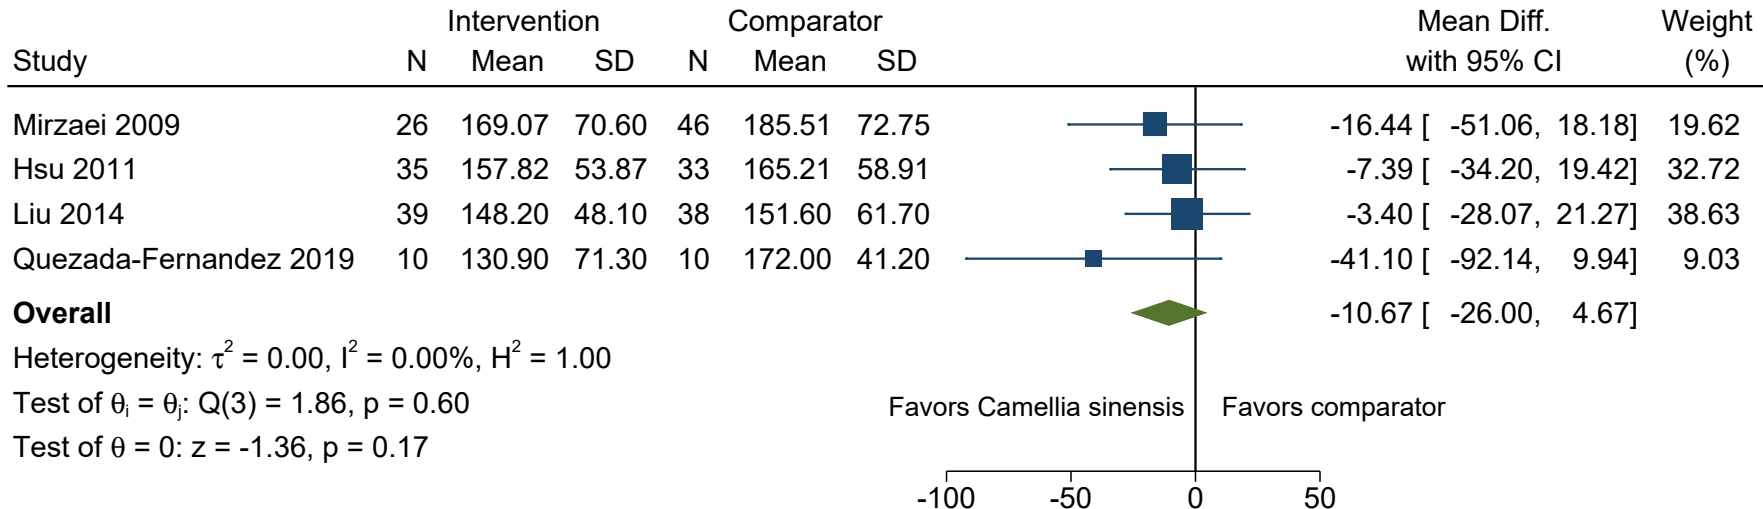

Random-effects REML model

Supplement: Data_Sheet_1.zip [file Data_Sheet_1.zip]

# Urtica dioica - HDL-C

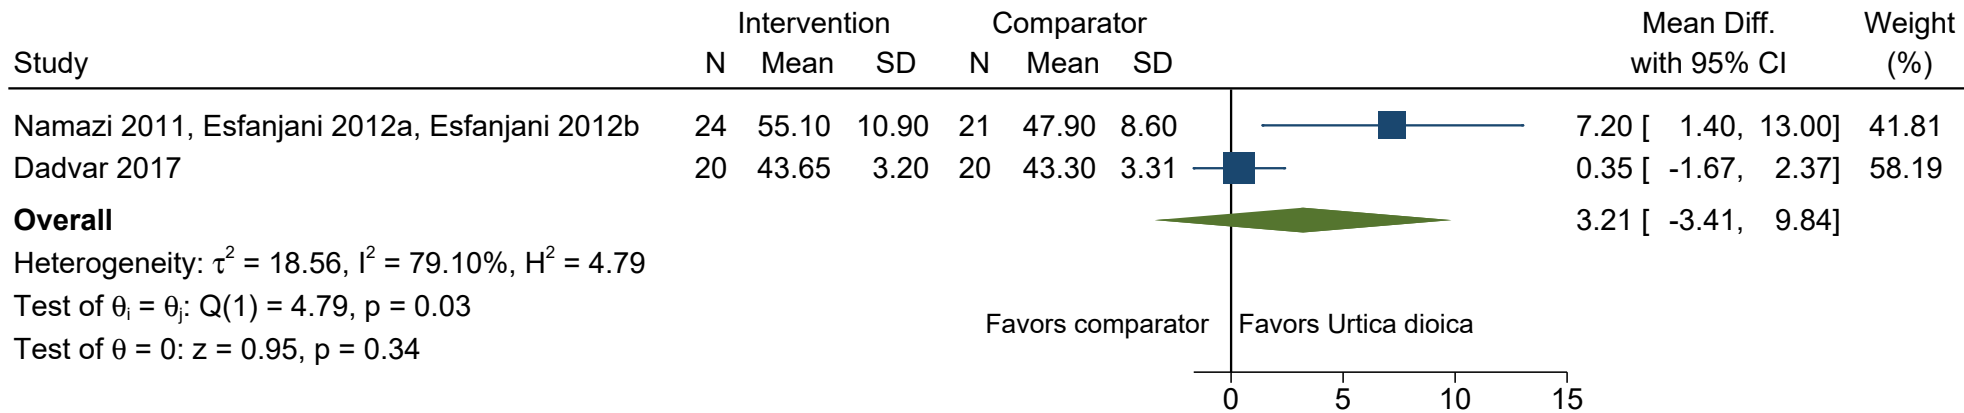

Random-effects REML model

Supplement: Data_Sheet_1.zip [file Data_Sheet_1.zip]

# Anethum graveolens - LDL-C

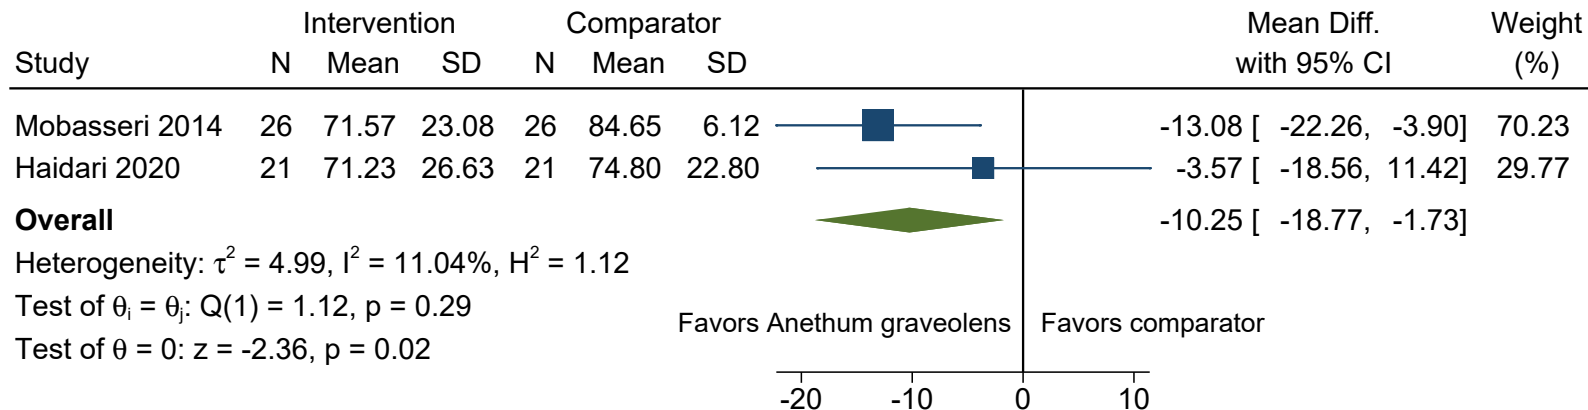

Random-effects REML model

Supplement: Data_Sheet_1.zip [file Data_Sheet_1.zip]

# Elettaria cardamomum - BMI

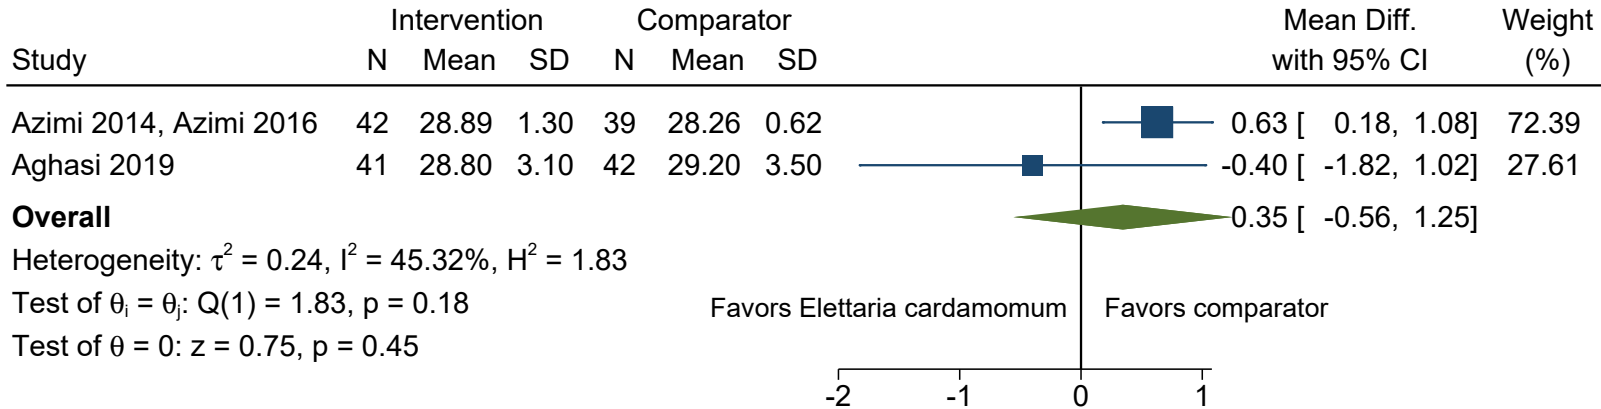

Random-effects REML model

Supplement: Data_Sheet_1.zip [file Data_Sheet_1.zip]

# Zingiber officinale - SBP

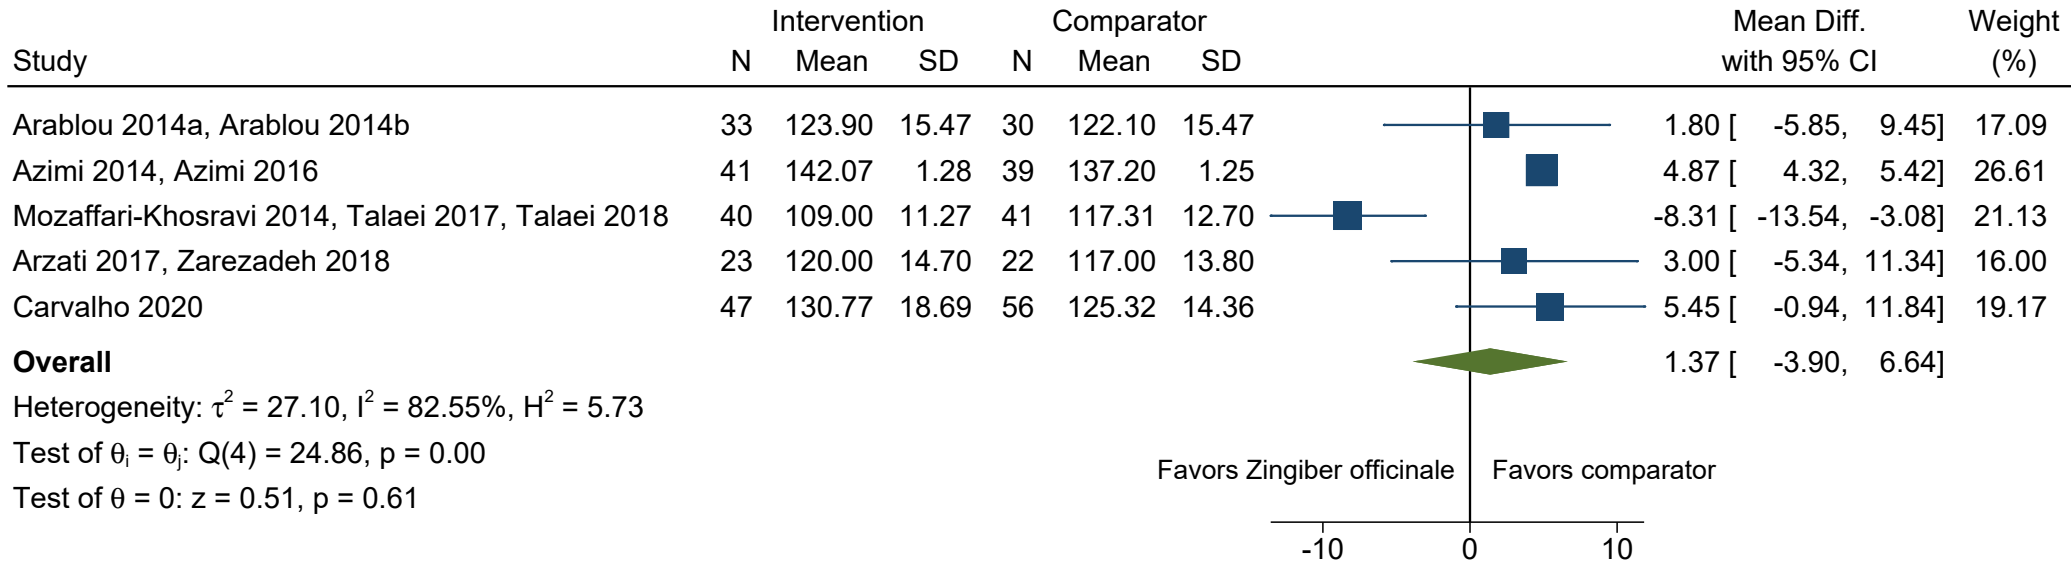

Supplement: Data_Sheet_1.zip [file Data_Sheet_1.zip]

# Ipomoea batatas - FBG

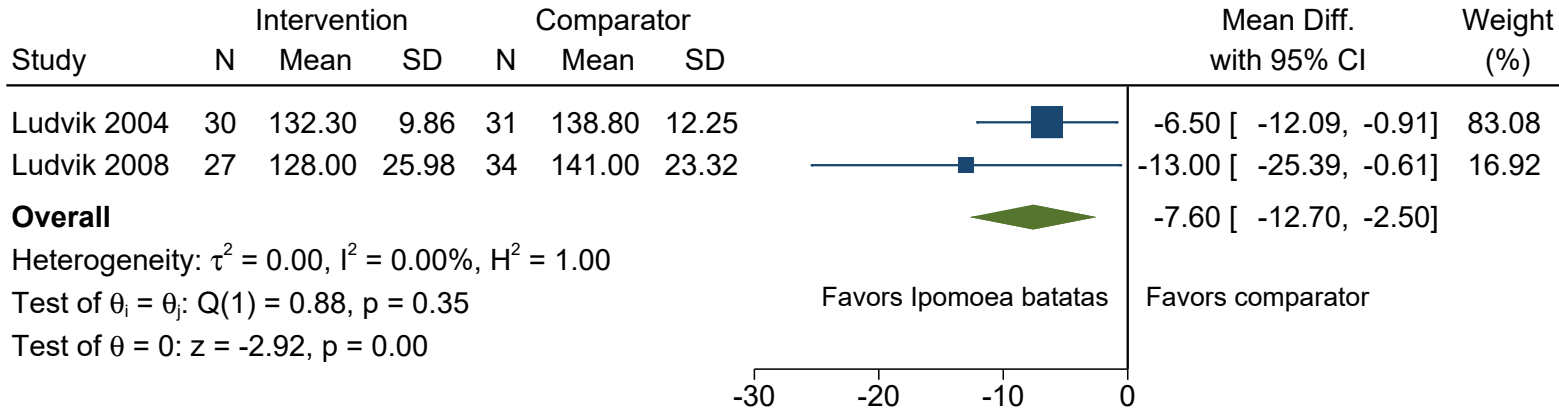

Random-effects REML model

Supplement: Data_Sheet_1.zip [file Data_Sheet_1.zip]

# Curcuma longa - SBP

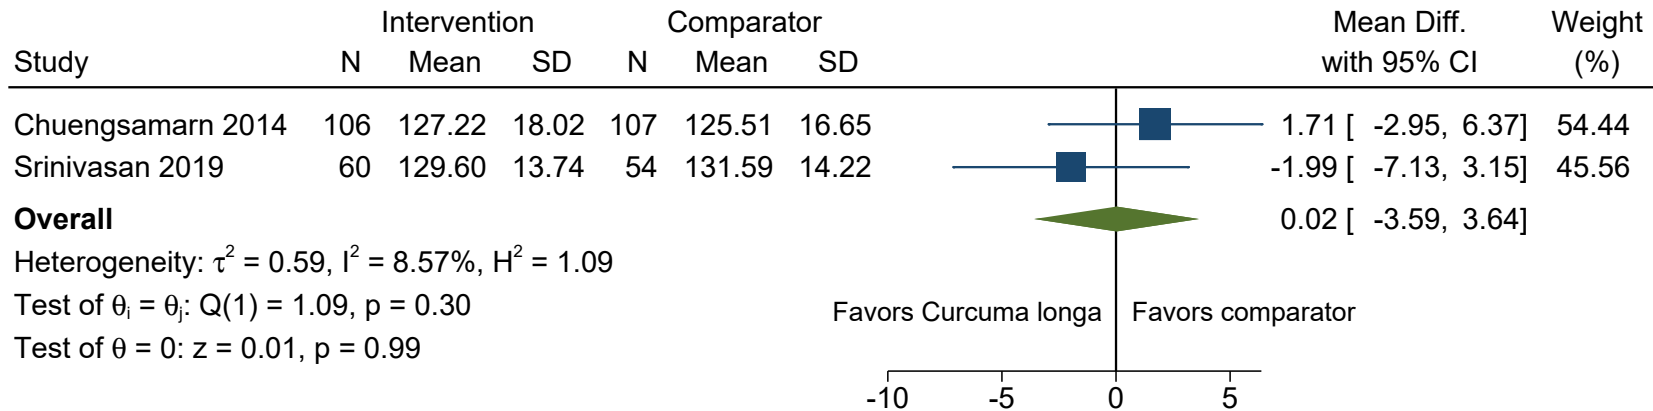

Random-effects REML model

Supplement: Data_Sheet_1.zip [file Data_Sheet_1.zip]

# Plantago ovata - Fasting insulin

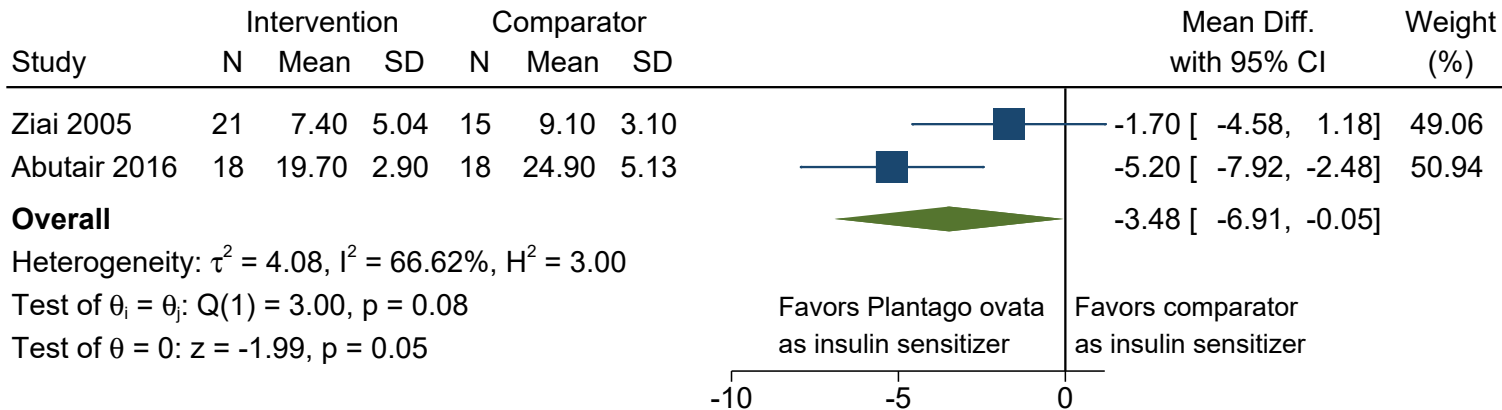

Random-effects REML model

Supplement: Data_Sheet_1.zip [file Data_Sheet_1.zip]

# Nigella sativa - Body weight

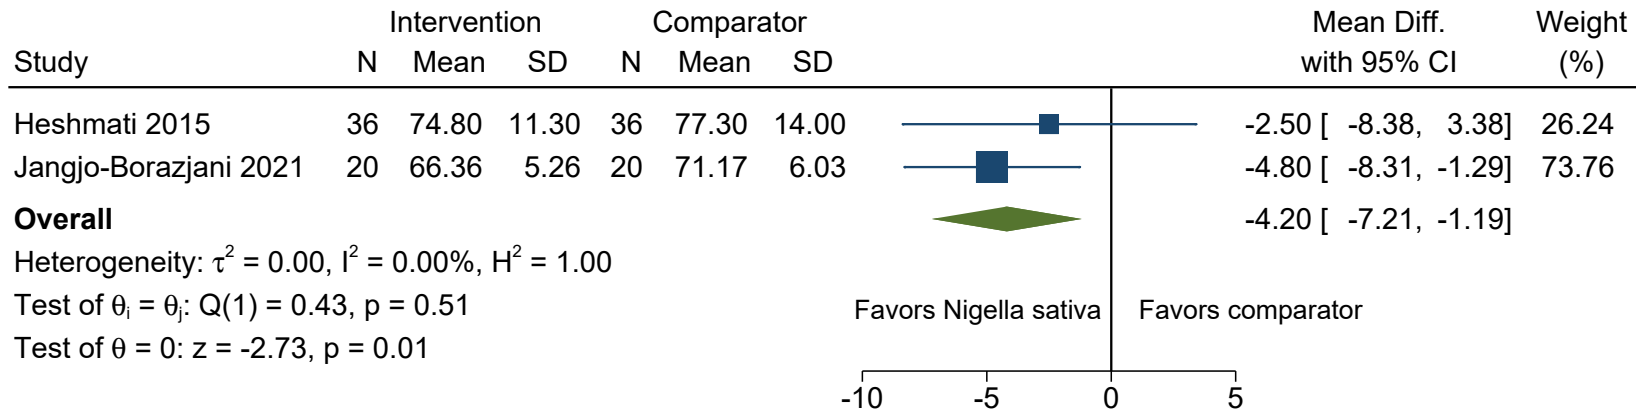

Random-effects REML model

Supplement: Data_Sheet_1.zip [file Data_Sheet_1.zip]

# Aegle marmelos - DBP

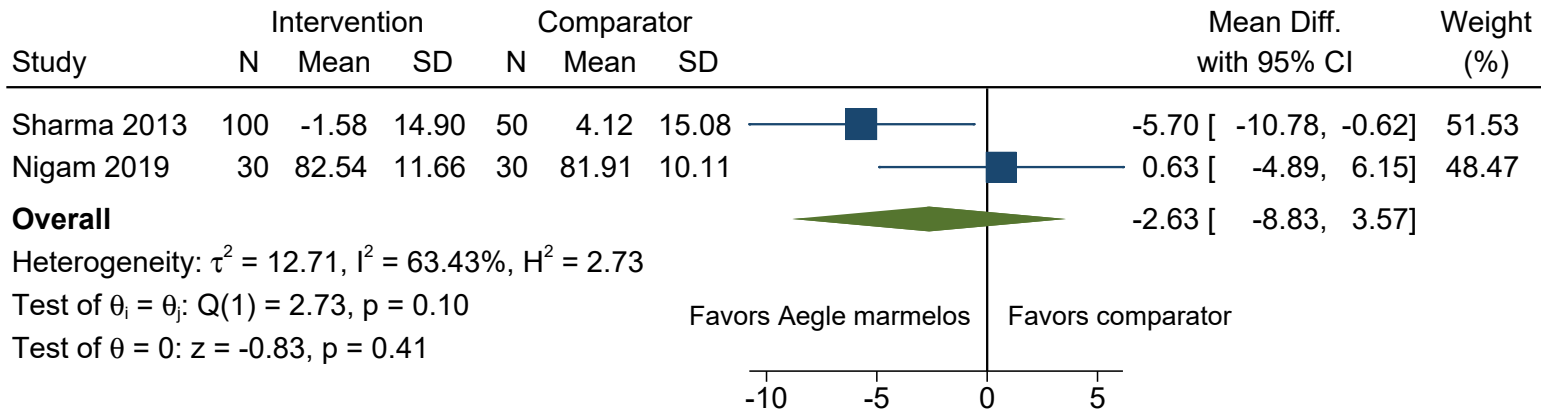

Random-effects REML model

Supplement: Data_Sheet_1.zip [file Data_Sheet_1.zip]

# Aloe vera - LDL-C

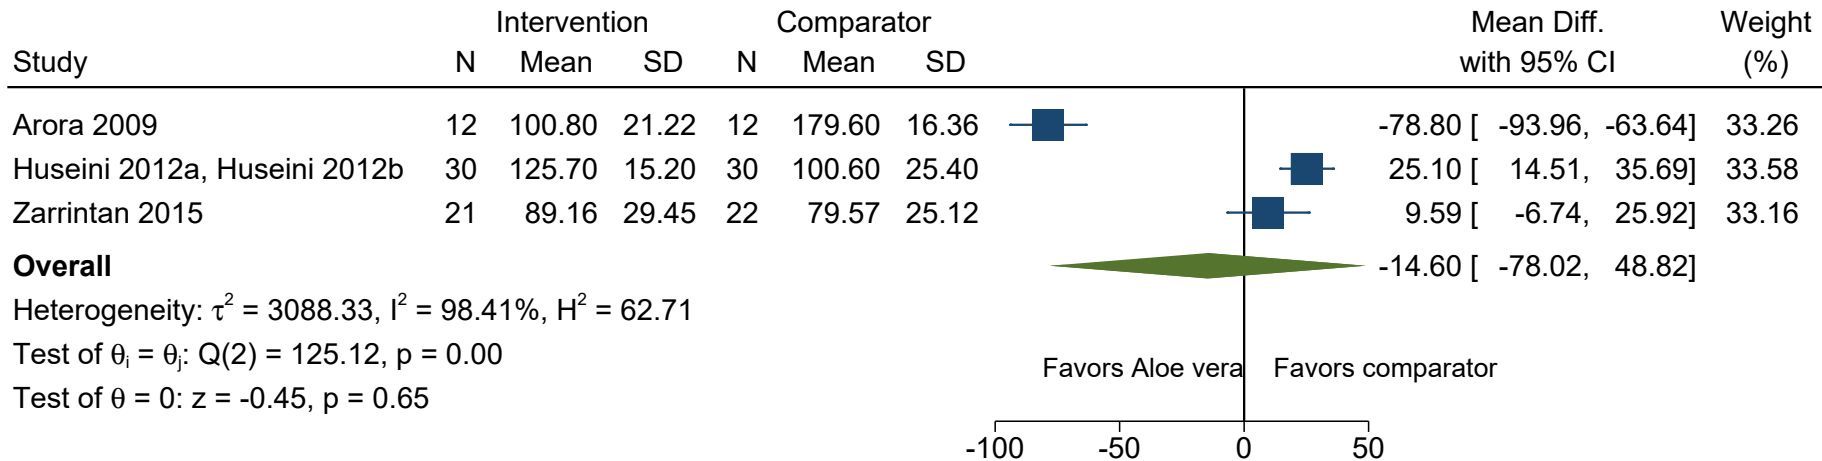

Random-effects REML model

Supplement: Data_Sheet_1.zip [file Data_Sheet_1.zip]

# Curcuma longa - DBP

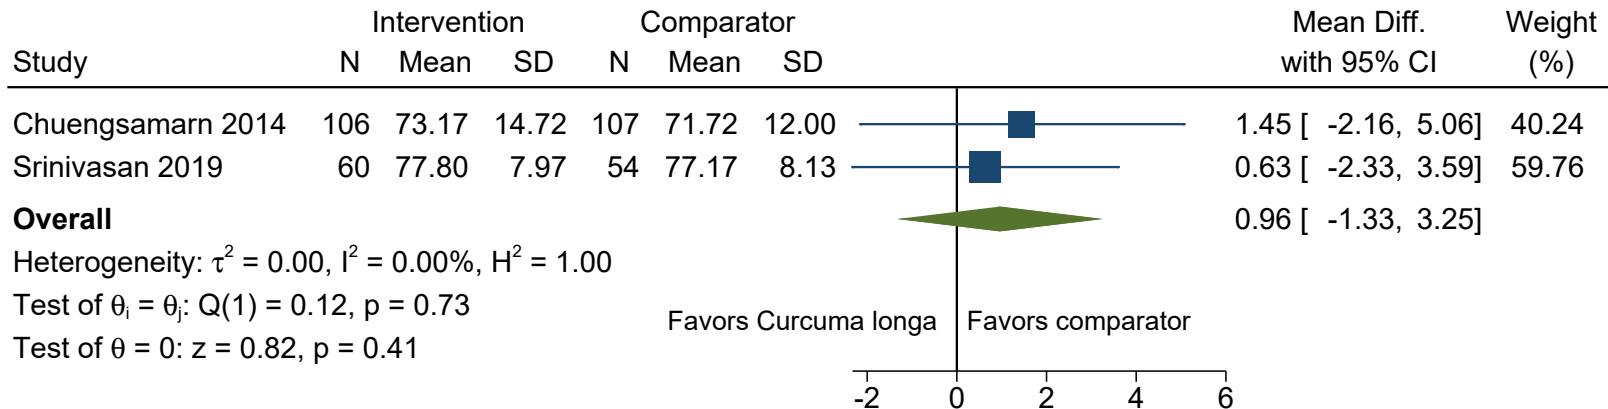

Random-effects REML model

Supplement: Data_Sheet_1.zip [file Data_Sheet_1.zip]

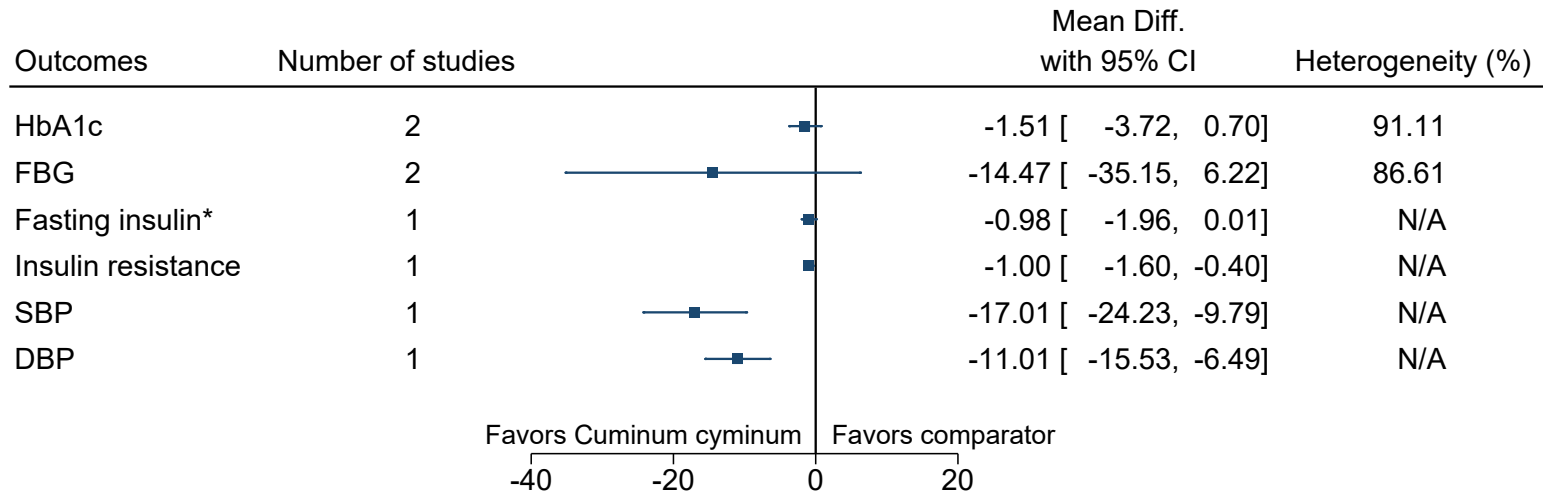

\*Favors intervention/comparator as insulin sensitizer

Supplement: Data_Sheet_1.zip [file Data_Sheet_1.zip]

# Citrullus colocynthis - FBG

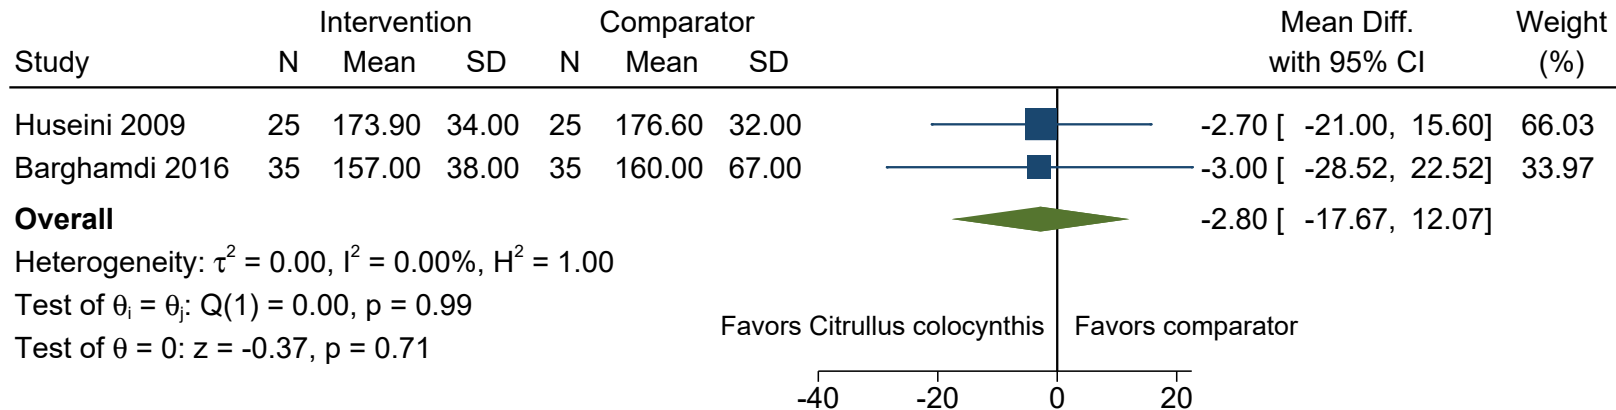

Random-effects REML model

Supplement: Data_Sheet_1.zip [file Data_Sheet_1.zip]

# Punica granatum - TC

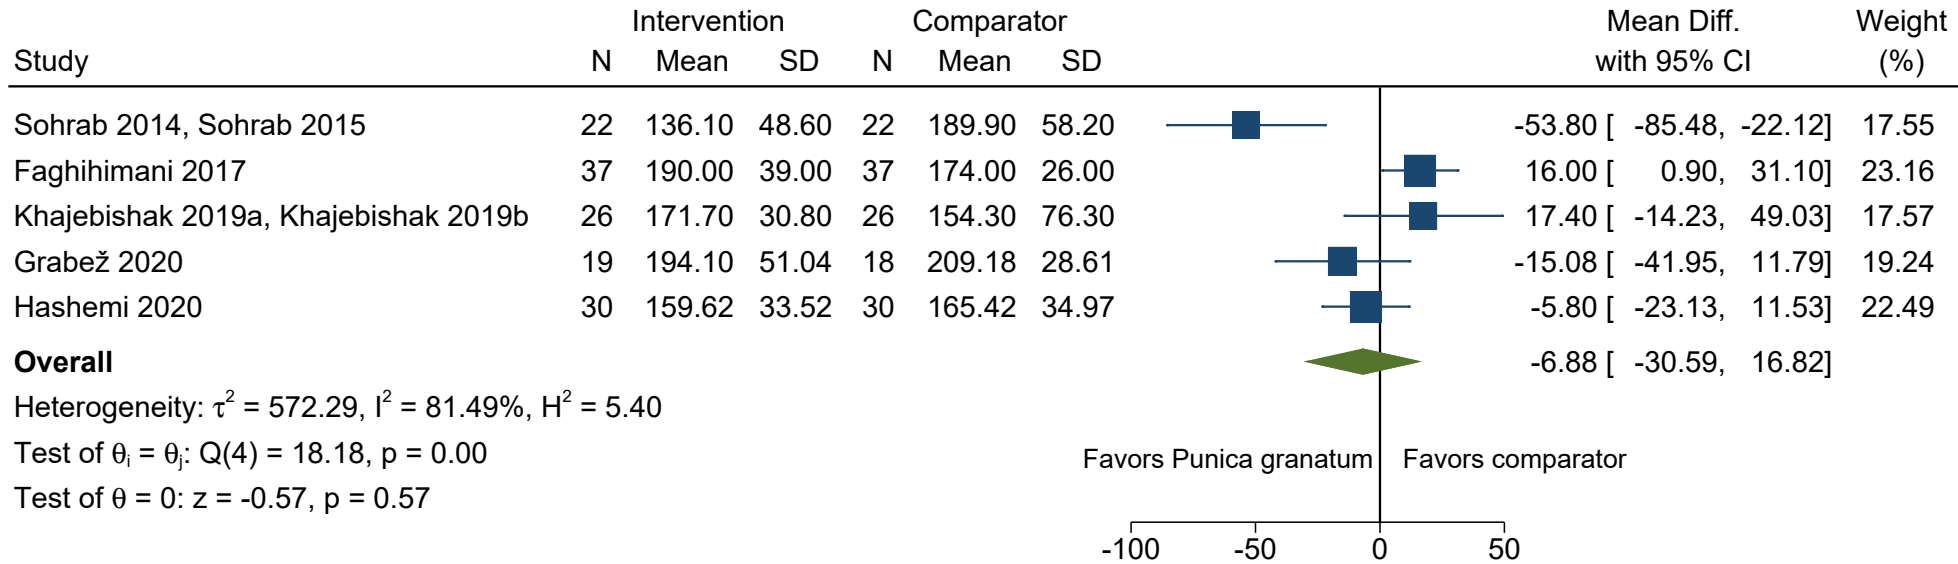

Supplement: Data_Sheet_1.zip [file Data_Sheet_1.zip]

# Cinnamomum verum - HDL-C

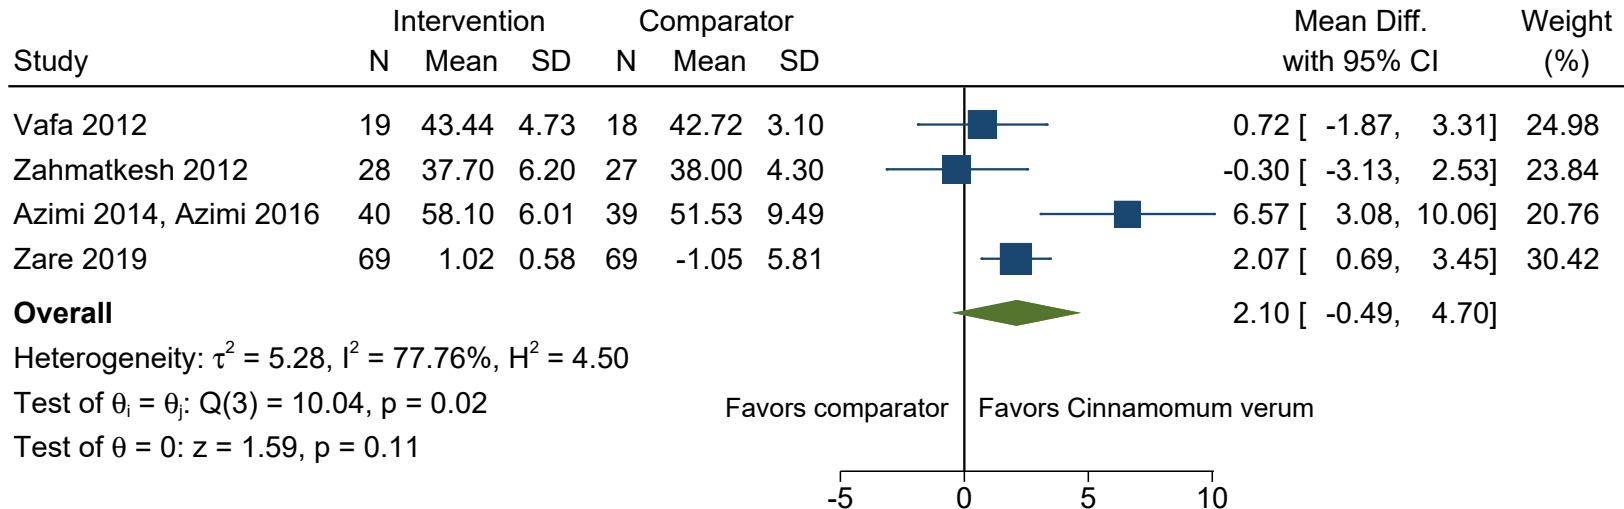

Random-effects REML model

Supplement: Data_Sheet_1.zip [file Data_Sheet_1.zip]

# Cinnamomum verum - BMI

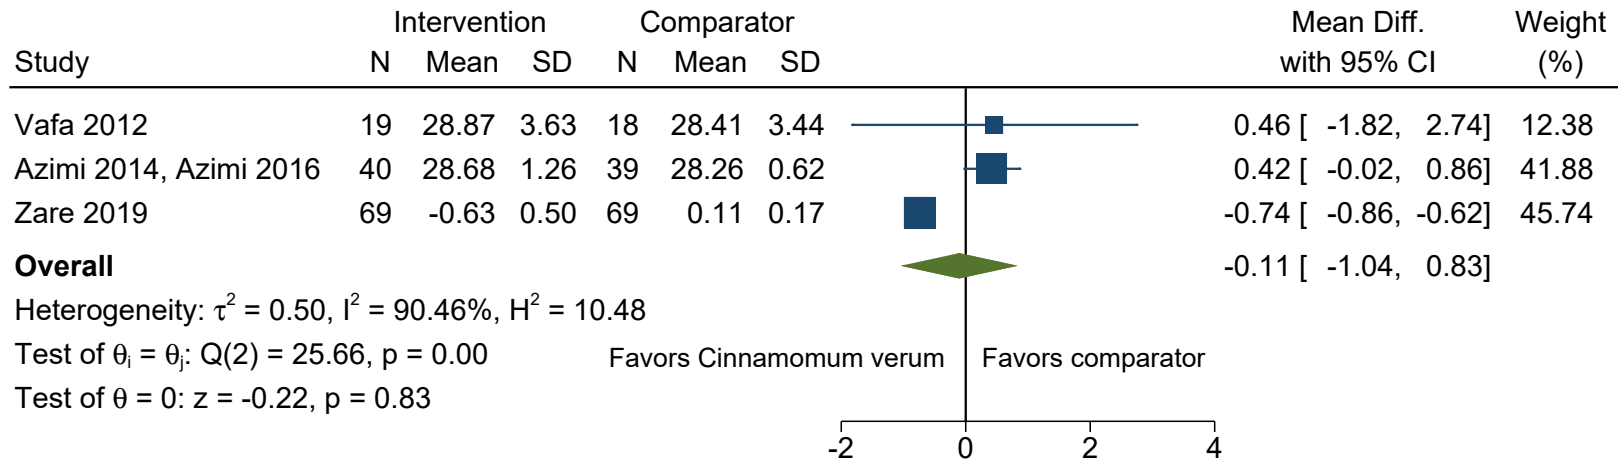

Random-effects REML model

Supplement: Data_Sheet_1.zip [file Data_Sheet_1.zip]

# Zingiber officinale - TC

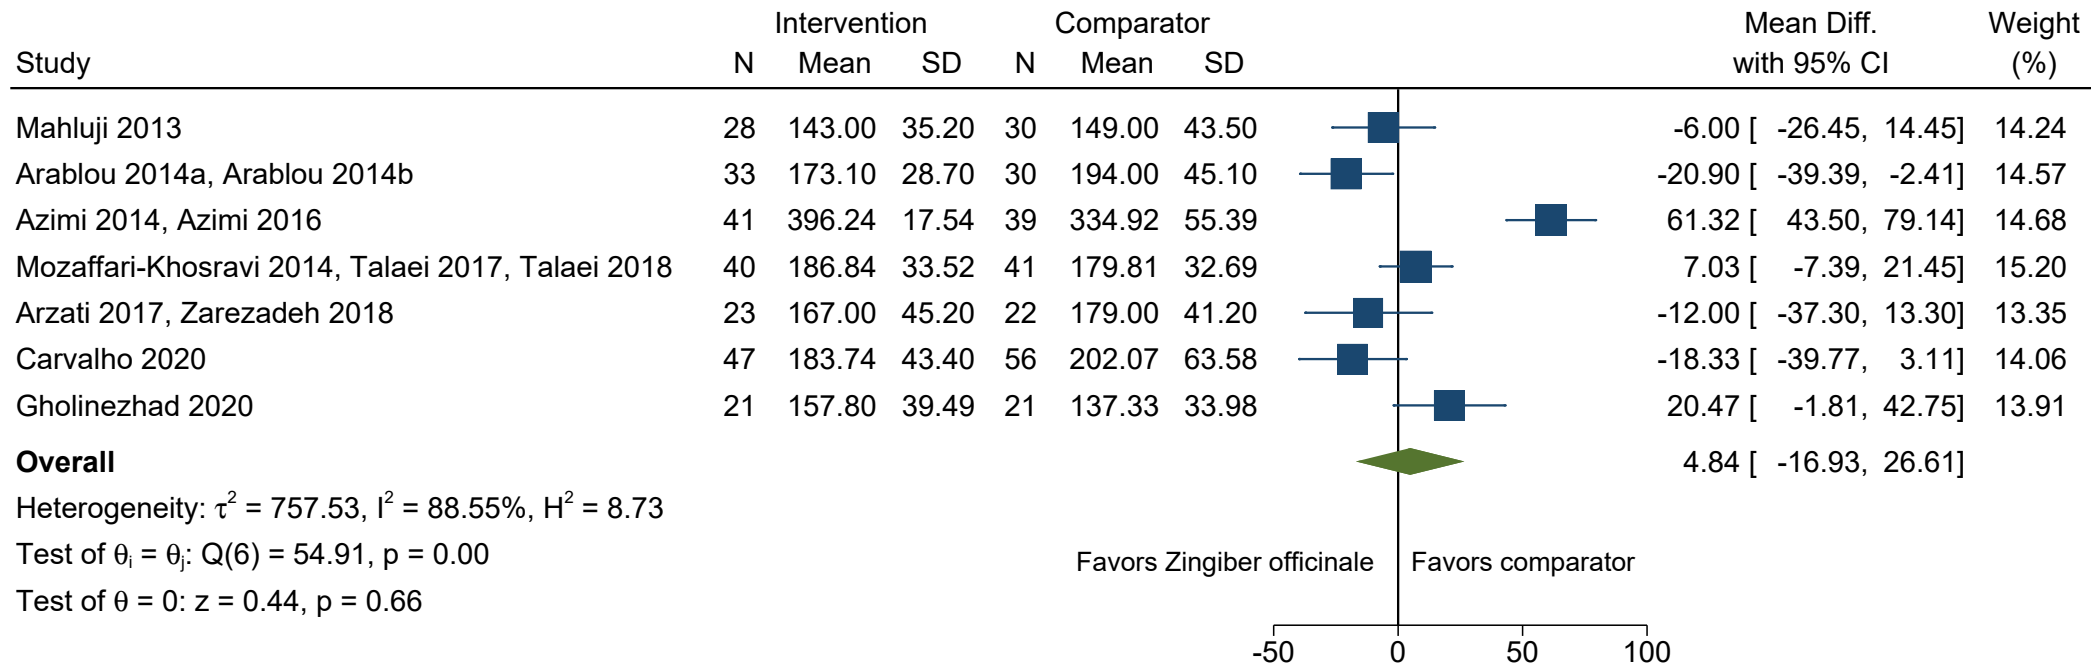

Supplement: Data_Sheet_1.zip [file Data_Sheet_1.zip]

# Momordica charantia - FBG - country subgroup analysis

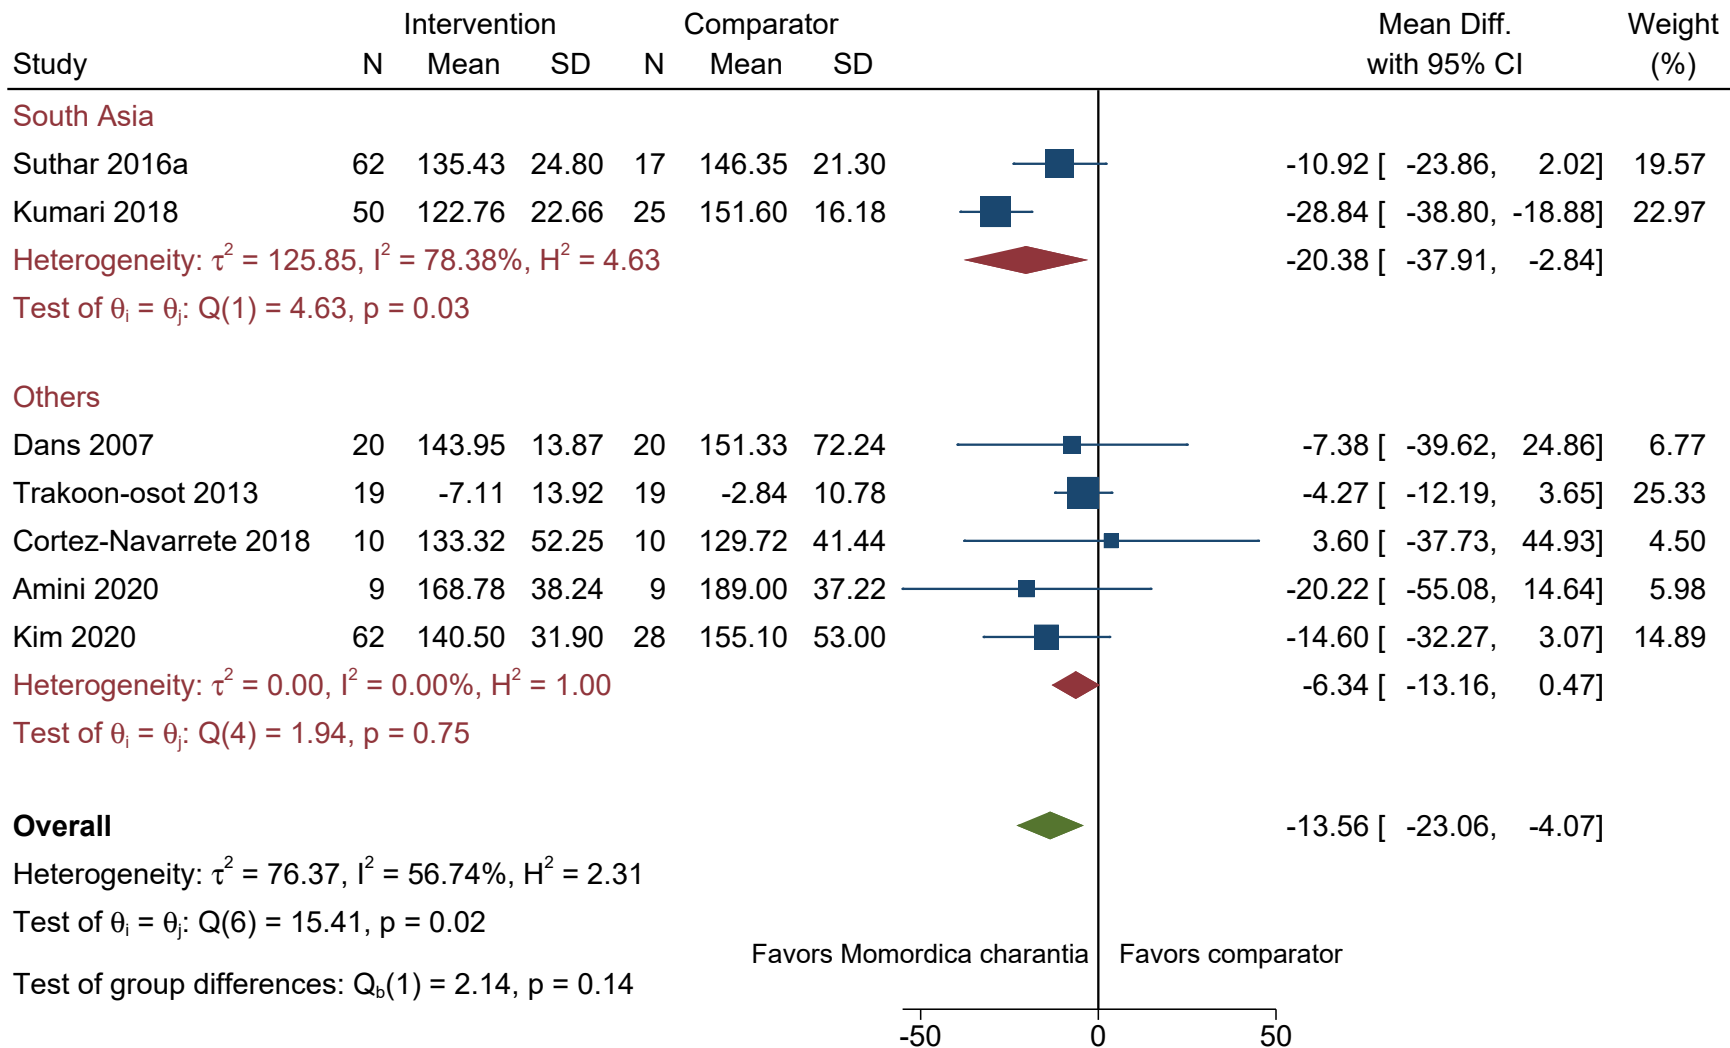

Supplement: Data_Sheet_1.zip [file Data_Sheet_1.zip]

# Juglans regia - HbA1c

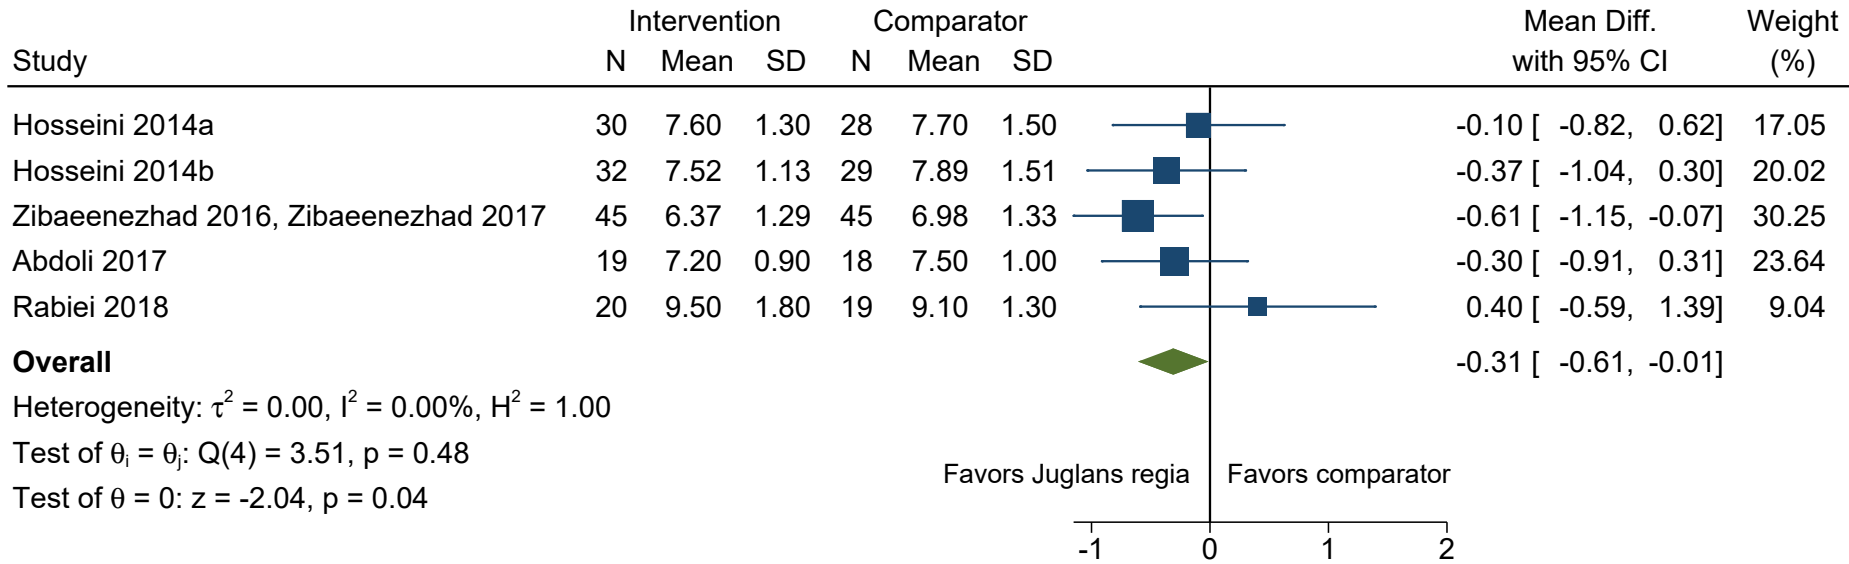

Supplement: Data_Sheet_1.zip [file Data_Sheet_1.zip]

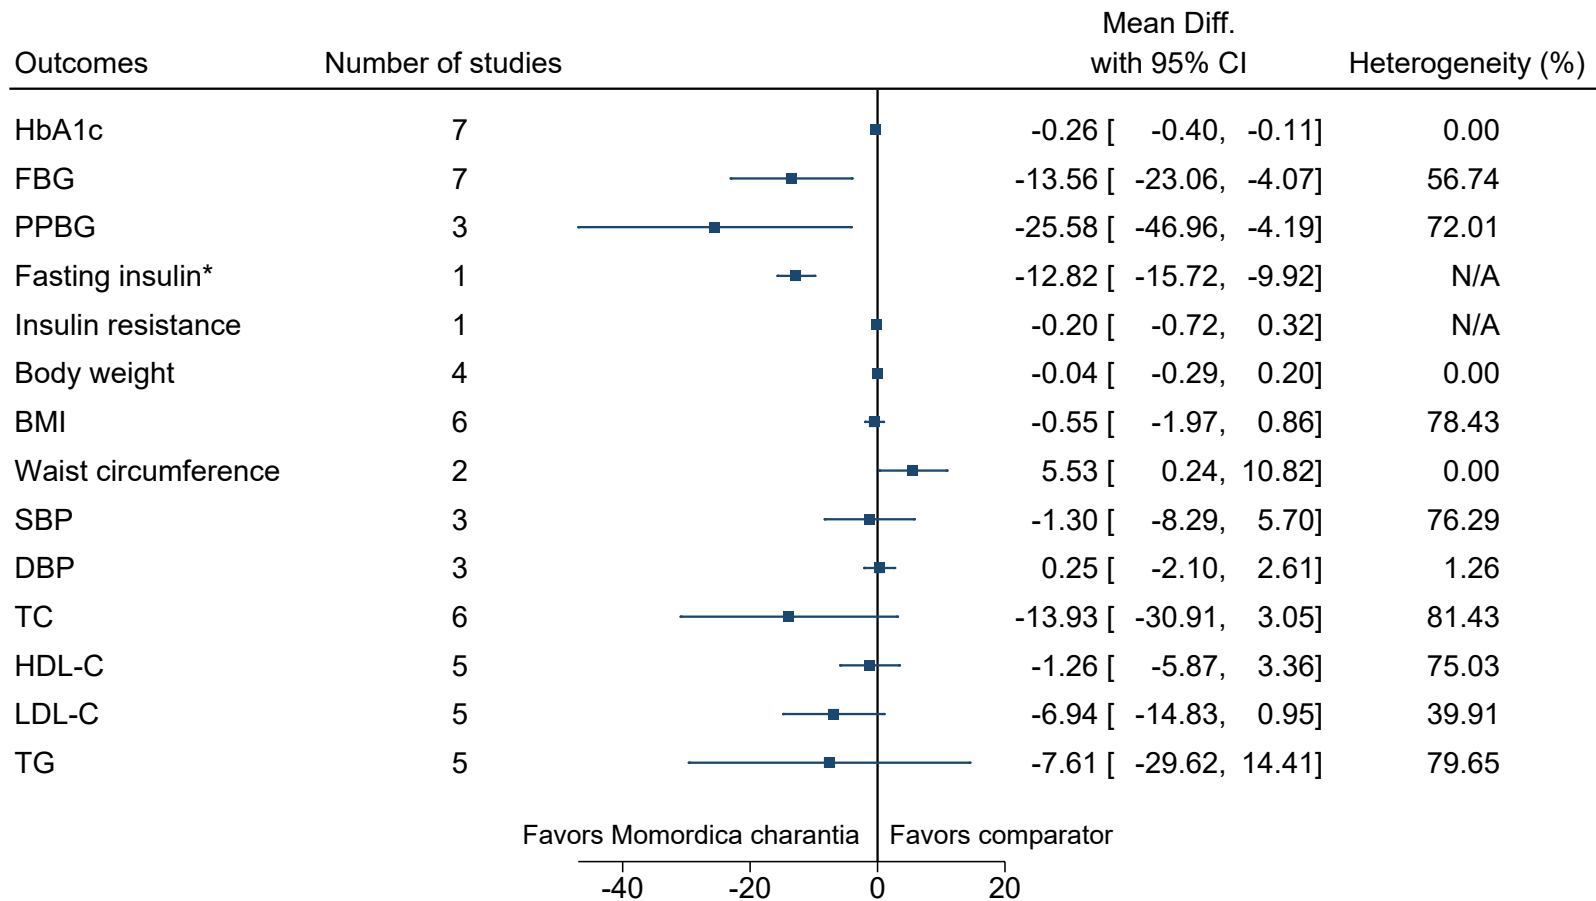

\*Favors intervention/comparator as insulin sensitizer

Supplement: Data_Sheet_1.zip [file Data_Sheet_1.zip]
