# Supplementary figures and images for: Effectiveness and Safety of Ayurvedic Medicines in Type 2 Diabetes Mellitus Management: A Systematic Review and Meta-Analysis (part 2 of 4)
Source: Frontiers journal article supplement (doi:10.3389/fphar.2022.821810), 2022-06-08

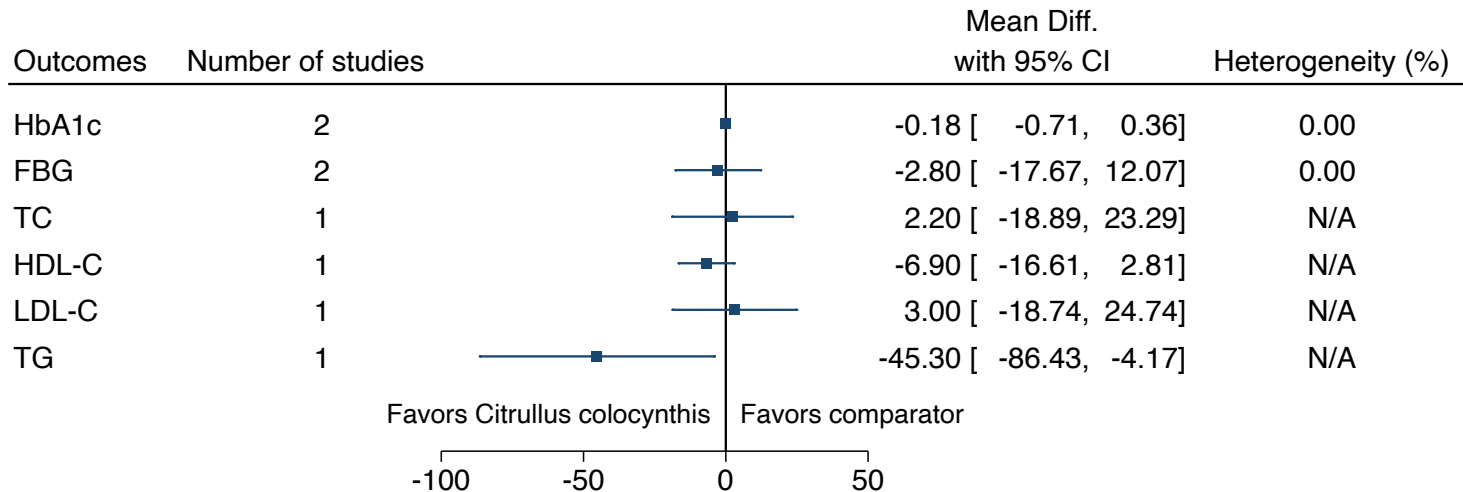

Supplement: Data_Sheet_1.zip [file Data_Sheet_1.zip]

# Cinnamomum verum - SBP

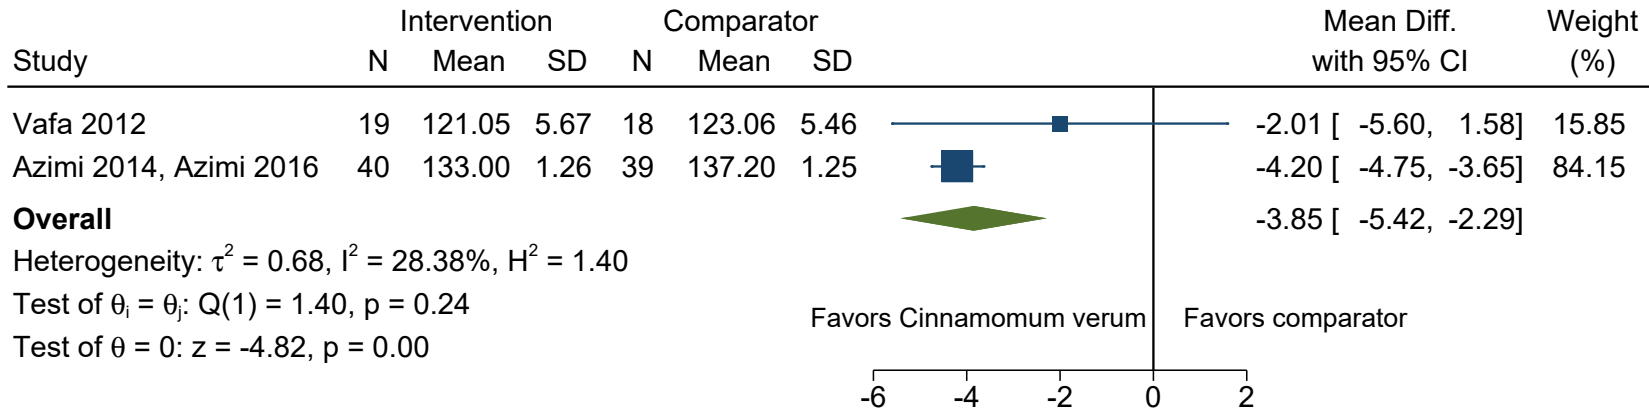

Random-effects REML model

Supplement: Data_Sheet_1.zip [file Data_Sheet_1.zip]

# Elettaria cardamomum - Waist circumference

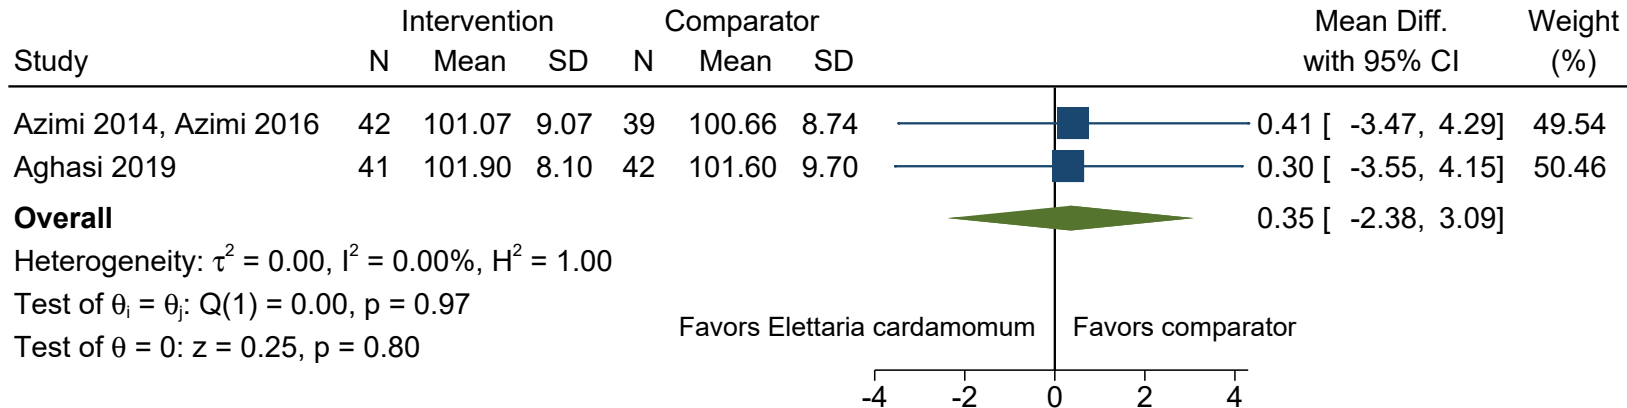

Random-effects REML model

Supplement: Data_Sheet_1.zip [file Data_Sheet_1.zip]

# Gynostemma pentaphyllum - Insulin sensitivity

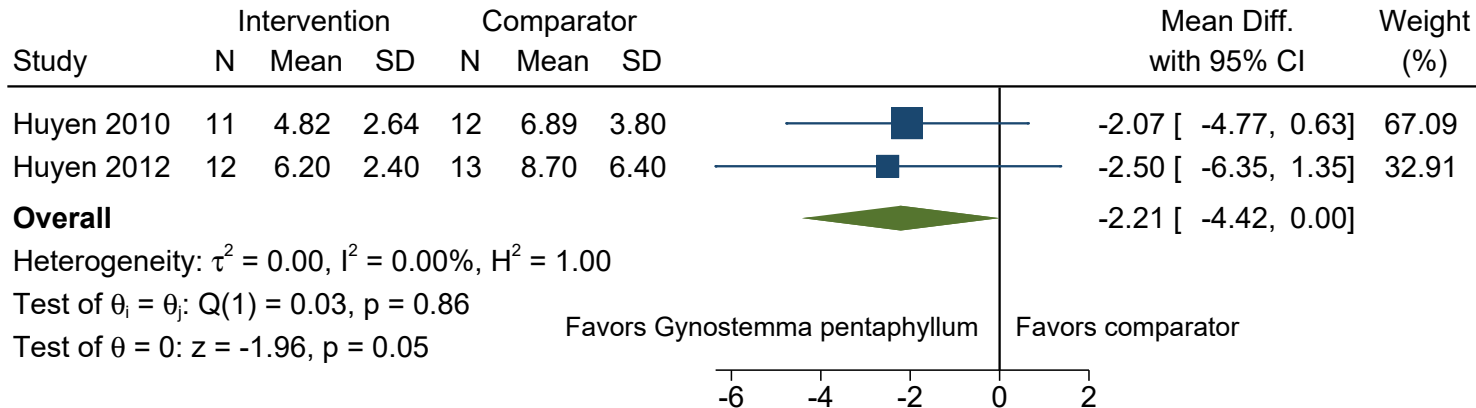

Random-effects REML model

Supplement: Data_Sheet_1.zip [file Data_Sheet_1.zip]

# Anethum graveolens - TG

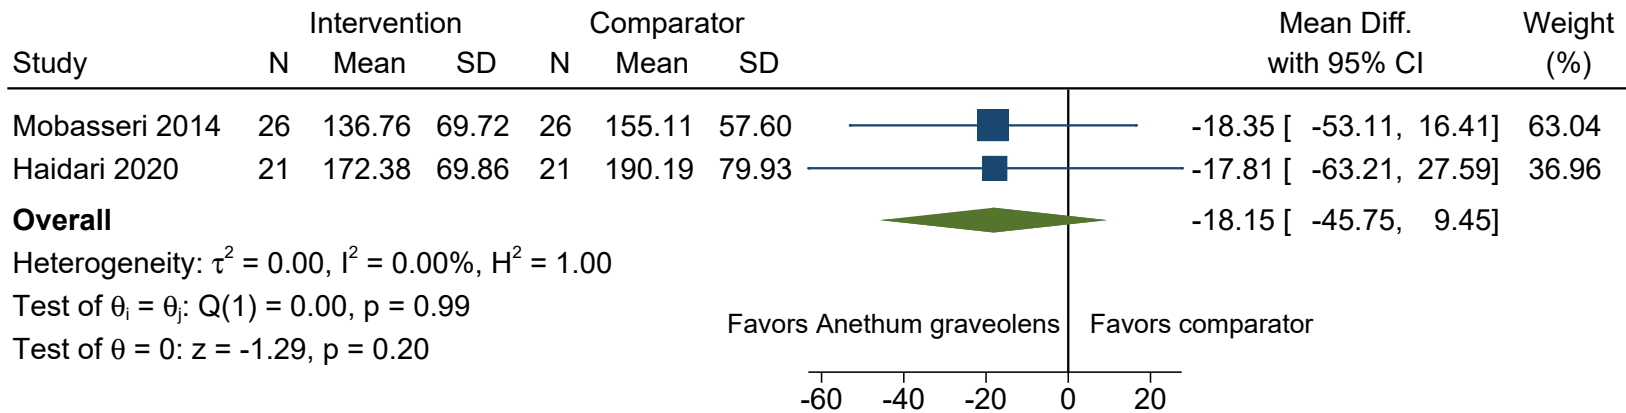

Random-effects REML model

Supplement: Data_Sheet_1.zip [file Data_Sheet_1.zip]

# Zingiber officinale - HDL-C

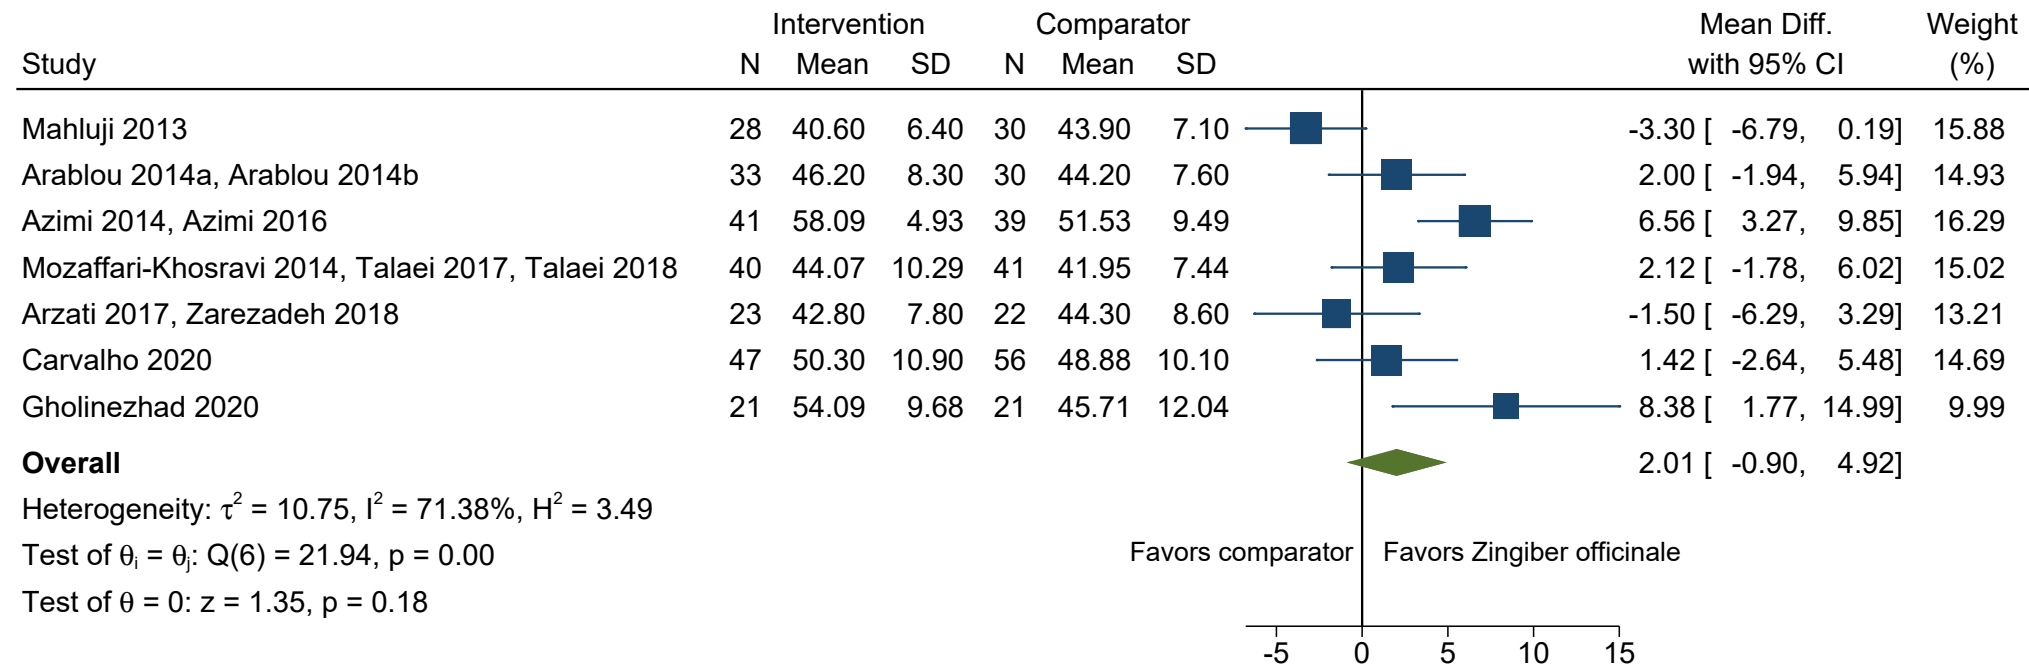

Supplement: Data_Sheet_1.zip [file Data_Sheet_1.zip]

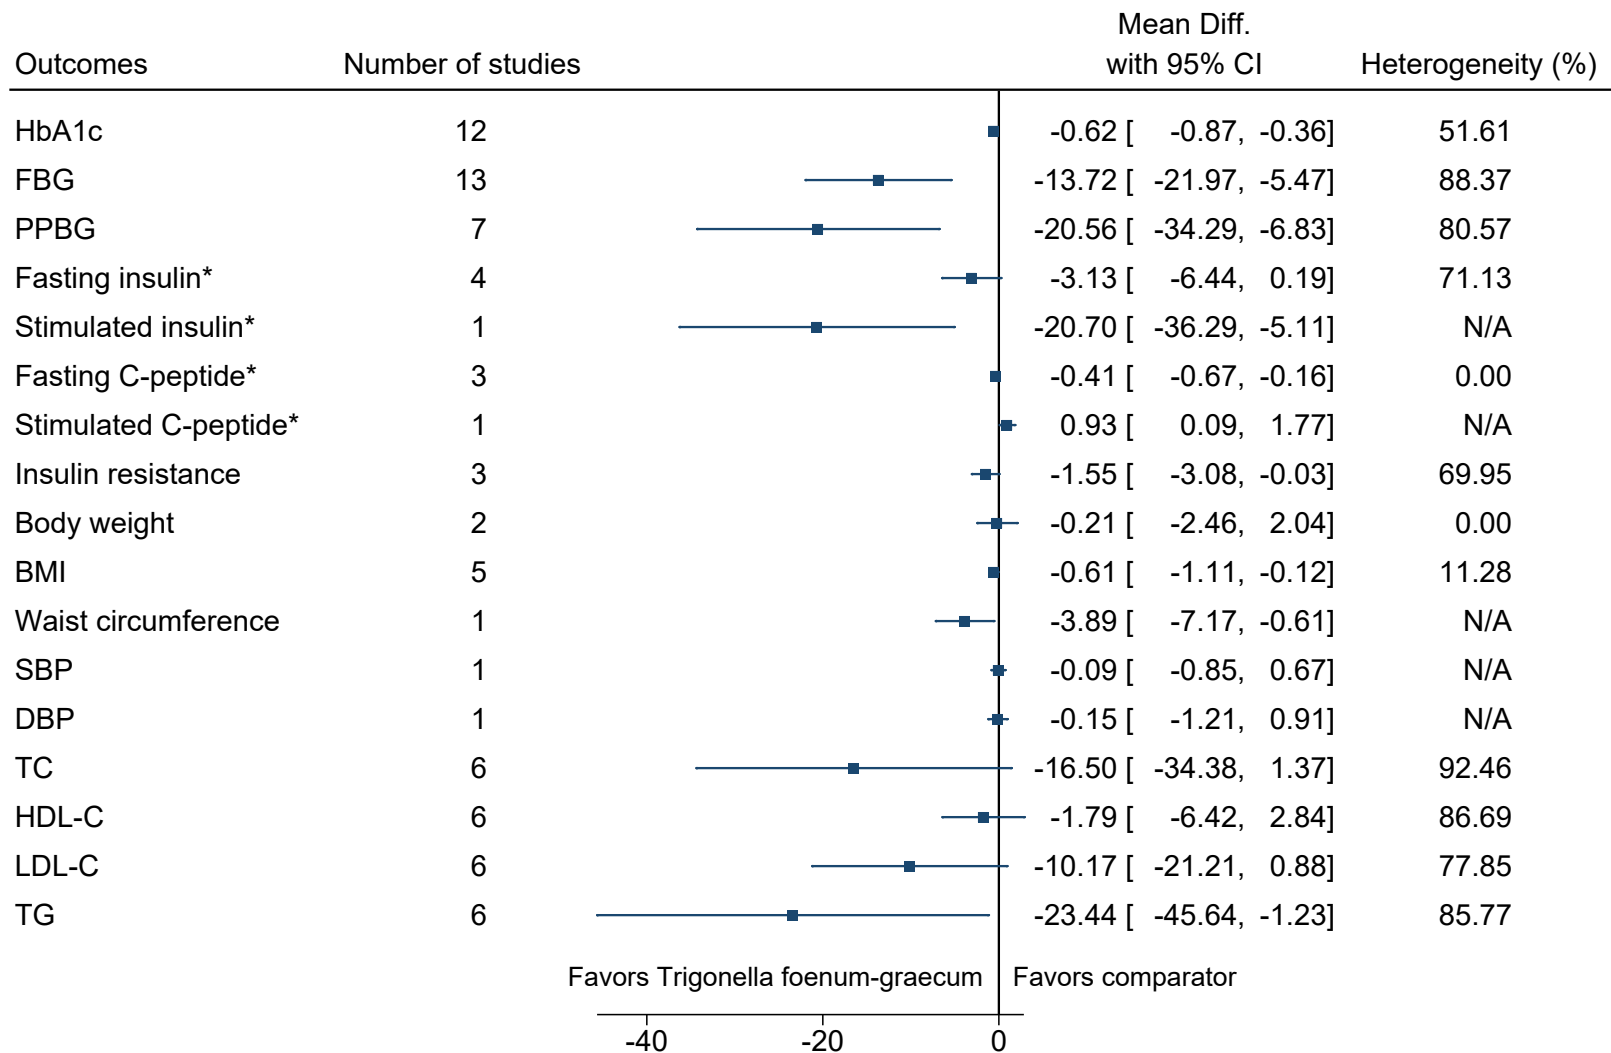

\*Favors intervention/comparator as insulin sensitizer

Supplement: Data_Sheet_1.zip [file Data_Sheet_1.zip]

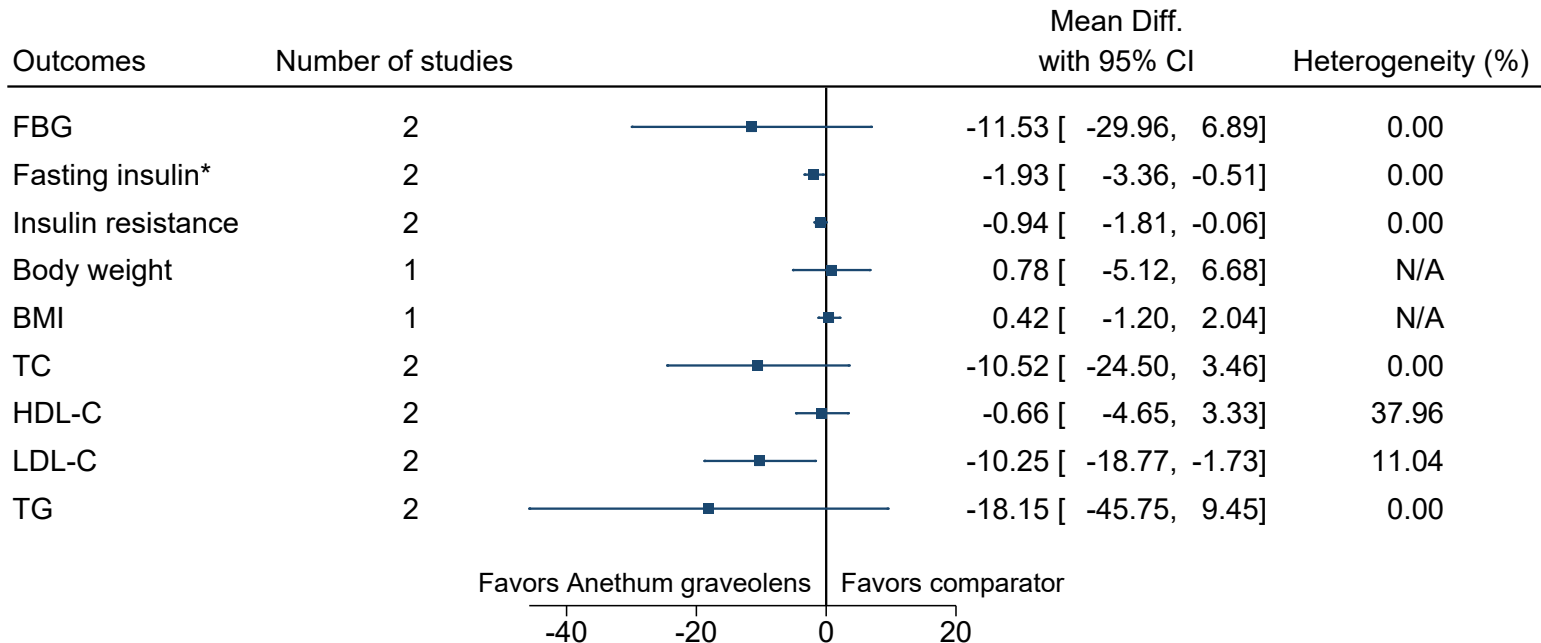

\*Favors intervention/comparator as insulin sensitizer

Supplement: Data_Sheet_1.zip [file Data_Sheet_1.zip]

# Crocus sativus - Waist circumference

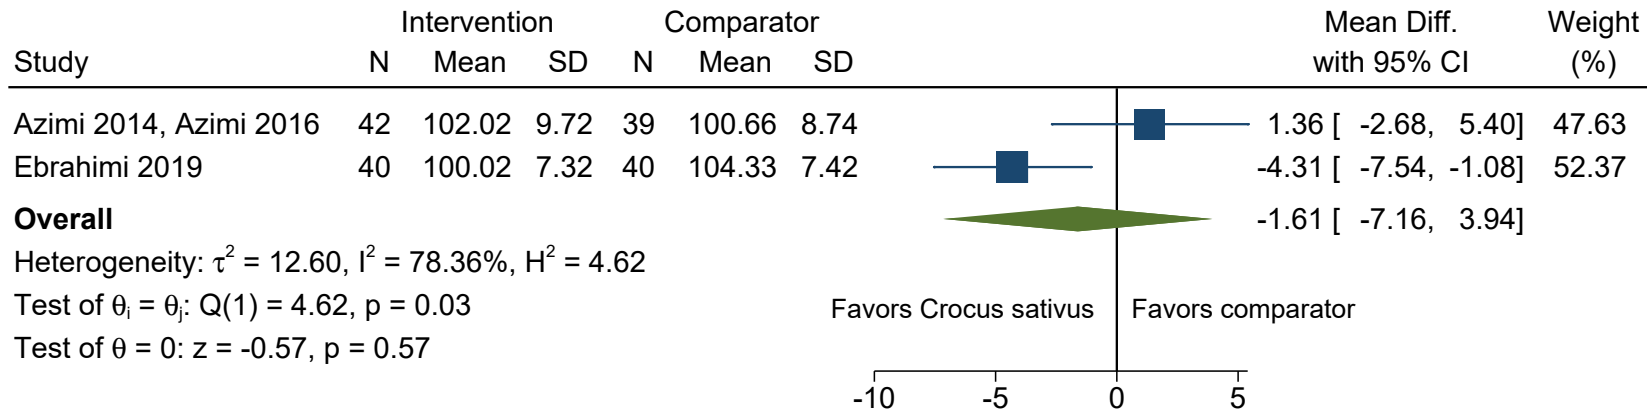

Random-effects REML model

Supplement: Data_Sheet_1.zip [file Data_Sheet_1.zip]

# Punica granatum - BMI

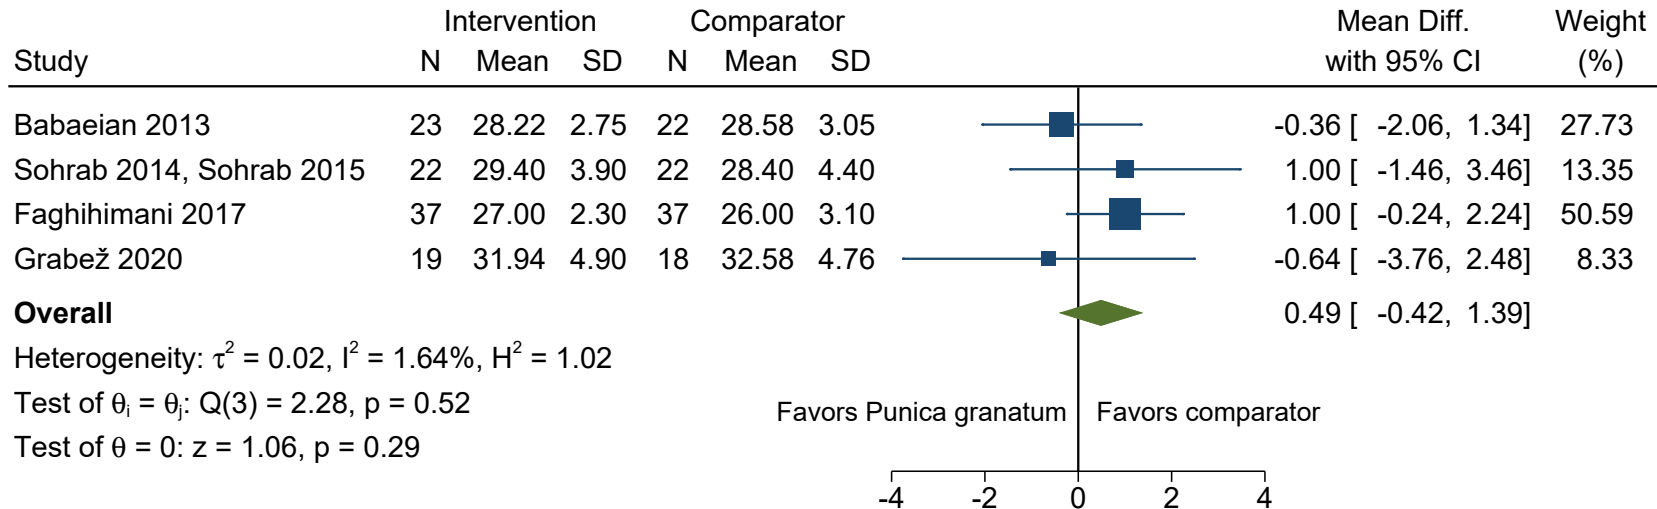

Random-effects REML model

Supplement: Data_Sheet_1.zip [file Data_Sheet_1.zip]

# Boswellia serrata - Fasting insulin

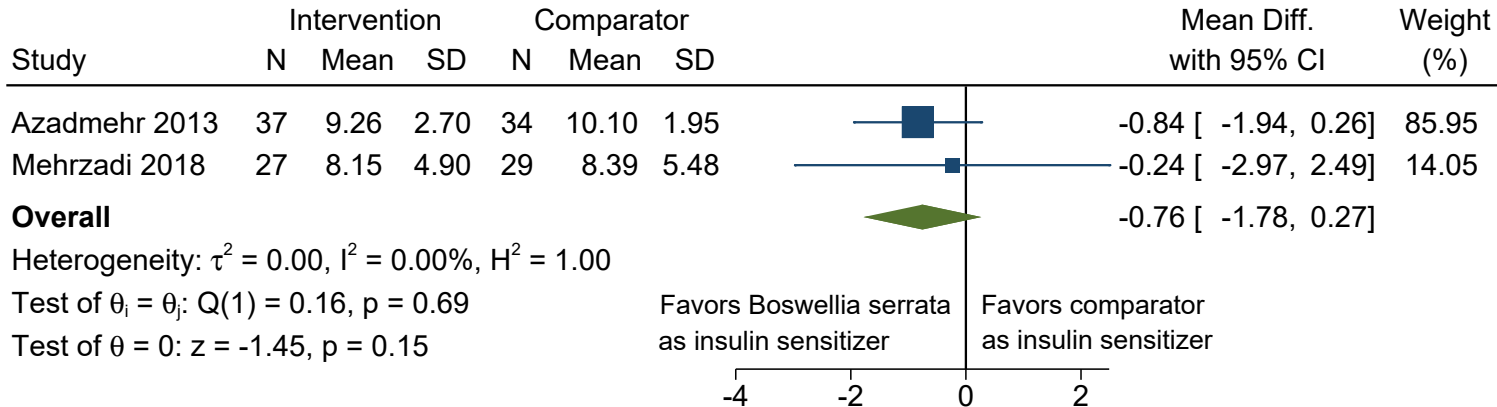

Random-effects REML model

Supplement: Data_Sheet_1.zip [file Data_Sheet_1.zip]

# Aloe vera - FBG

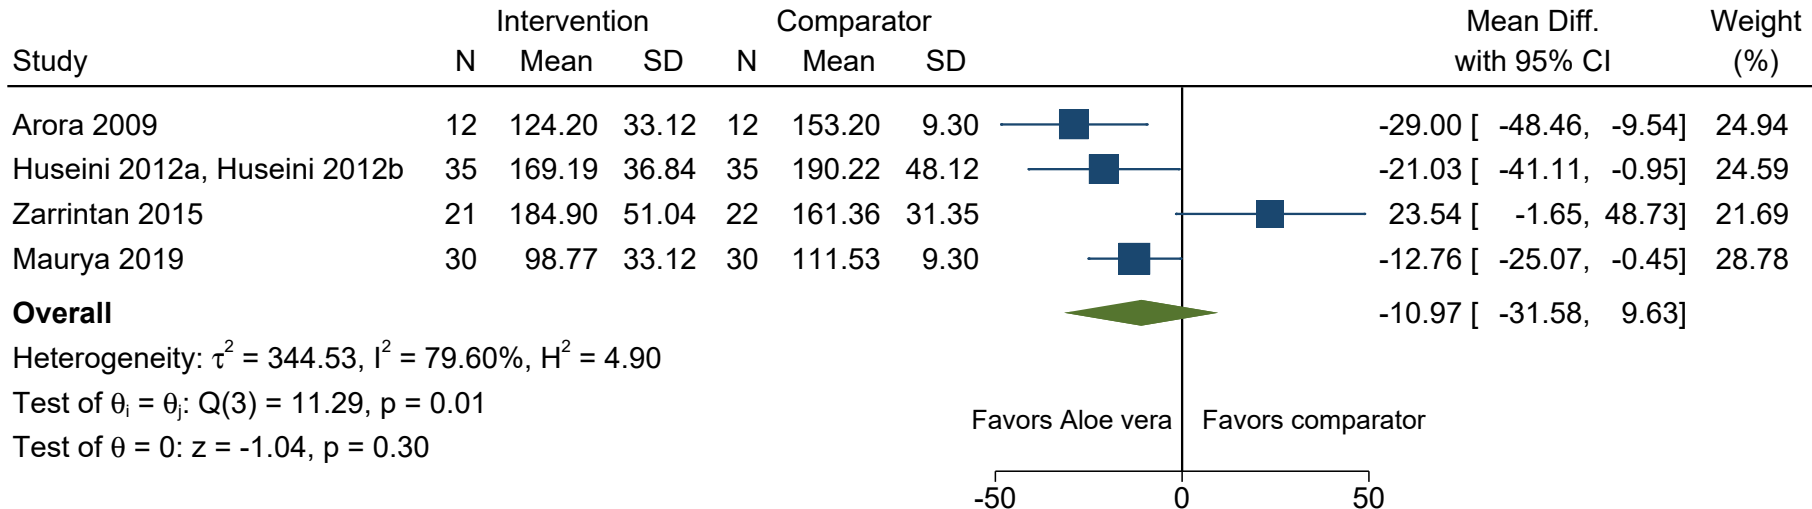

Random-effects REML model

Supplement: Data_Sheet_1.zip [file Data_Sheet_1.zip]

# Cinnamomum verum - Insulin resistance

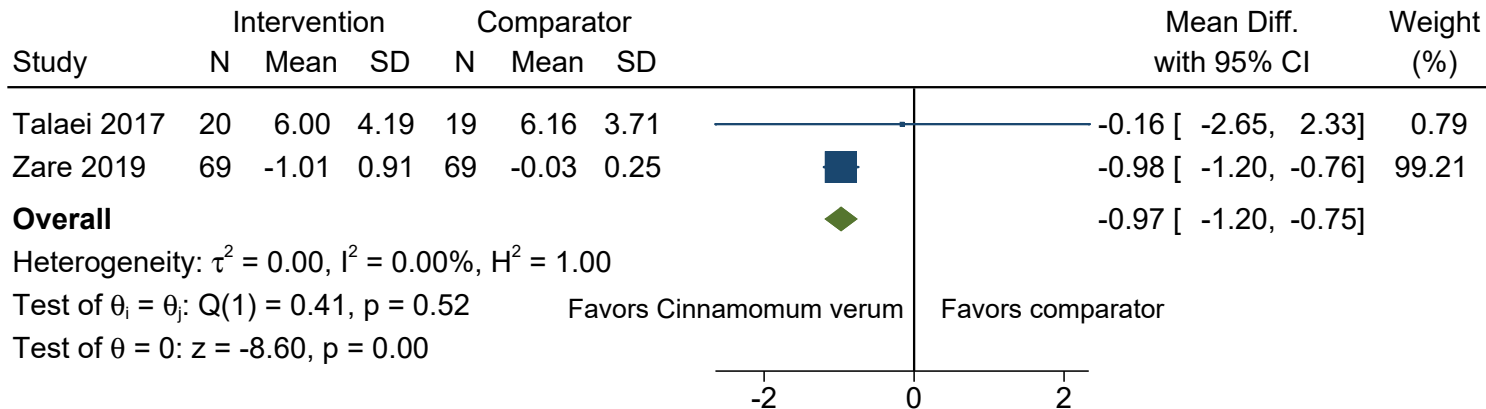

Random-effects REML model

Supplement: Data_Sheet_1.zip [file Data_Sheet_1.zip]

# Cyamopsis tetragonoloba - SBP

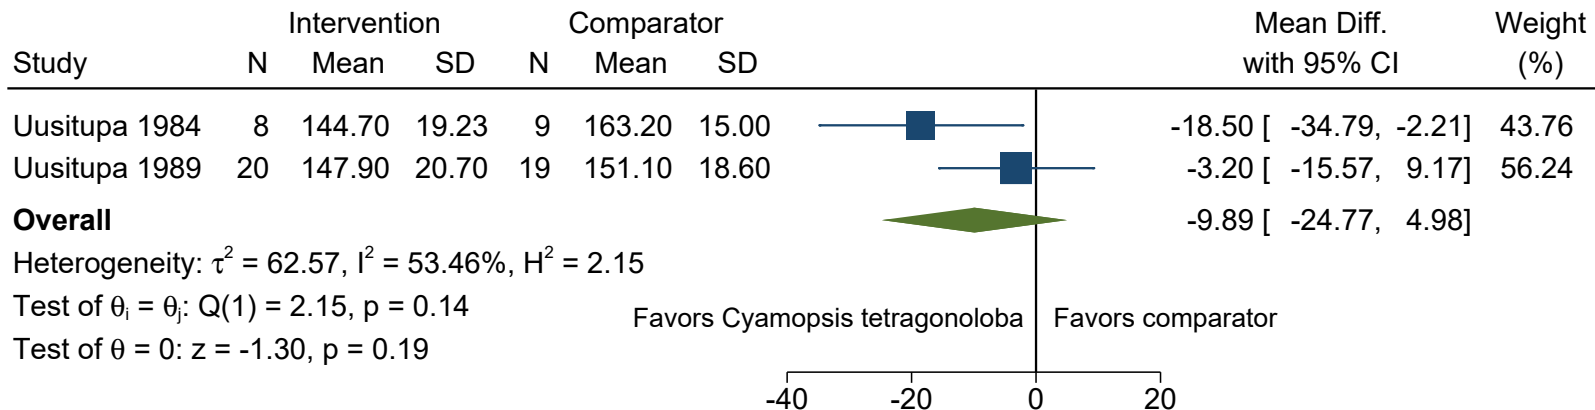

Random-effects REML model

Supplement: Data_Sheet_1.zip [file Data_Sheet_1.zip]

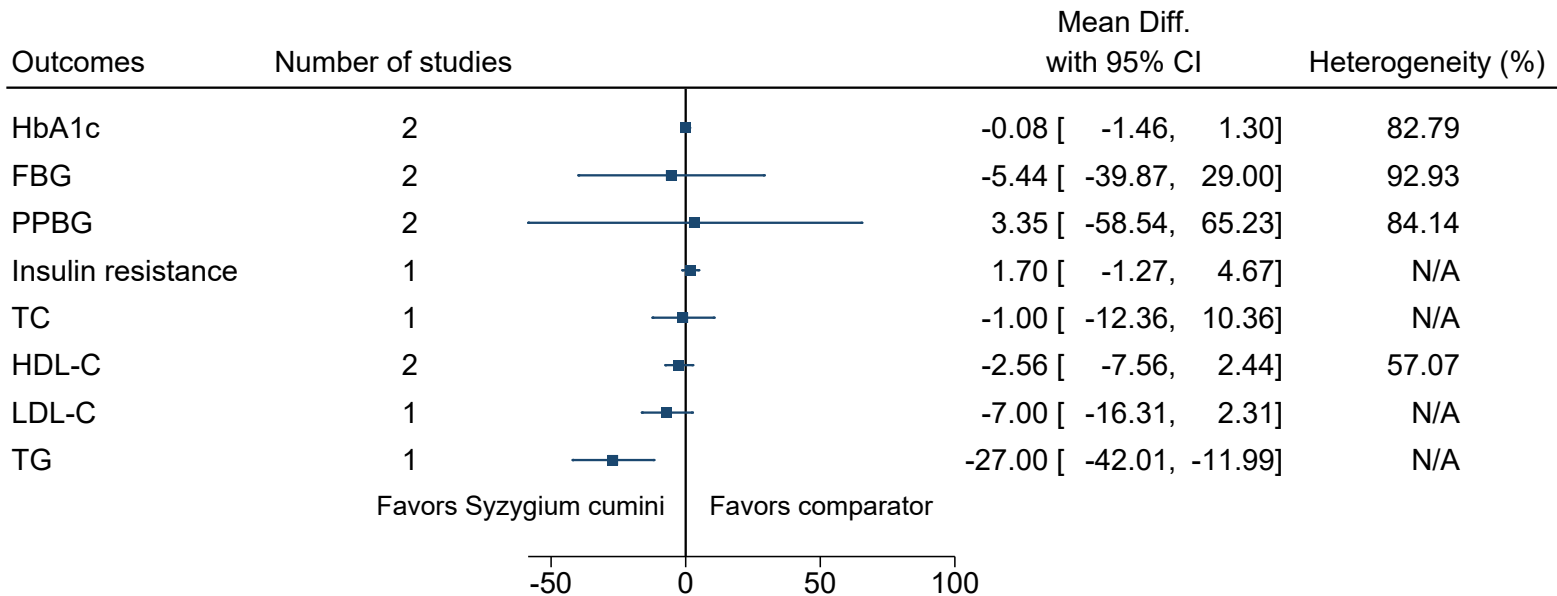

Supplement: Data_Sheet_1.zip [file Data_Sheet_1.zip]

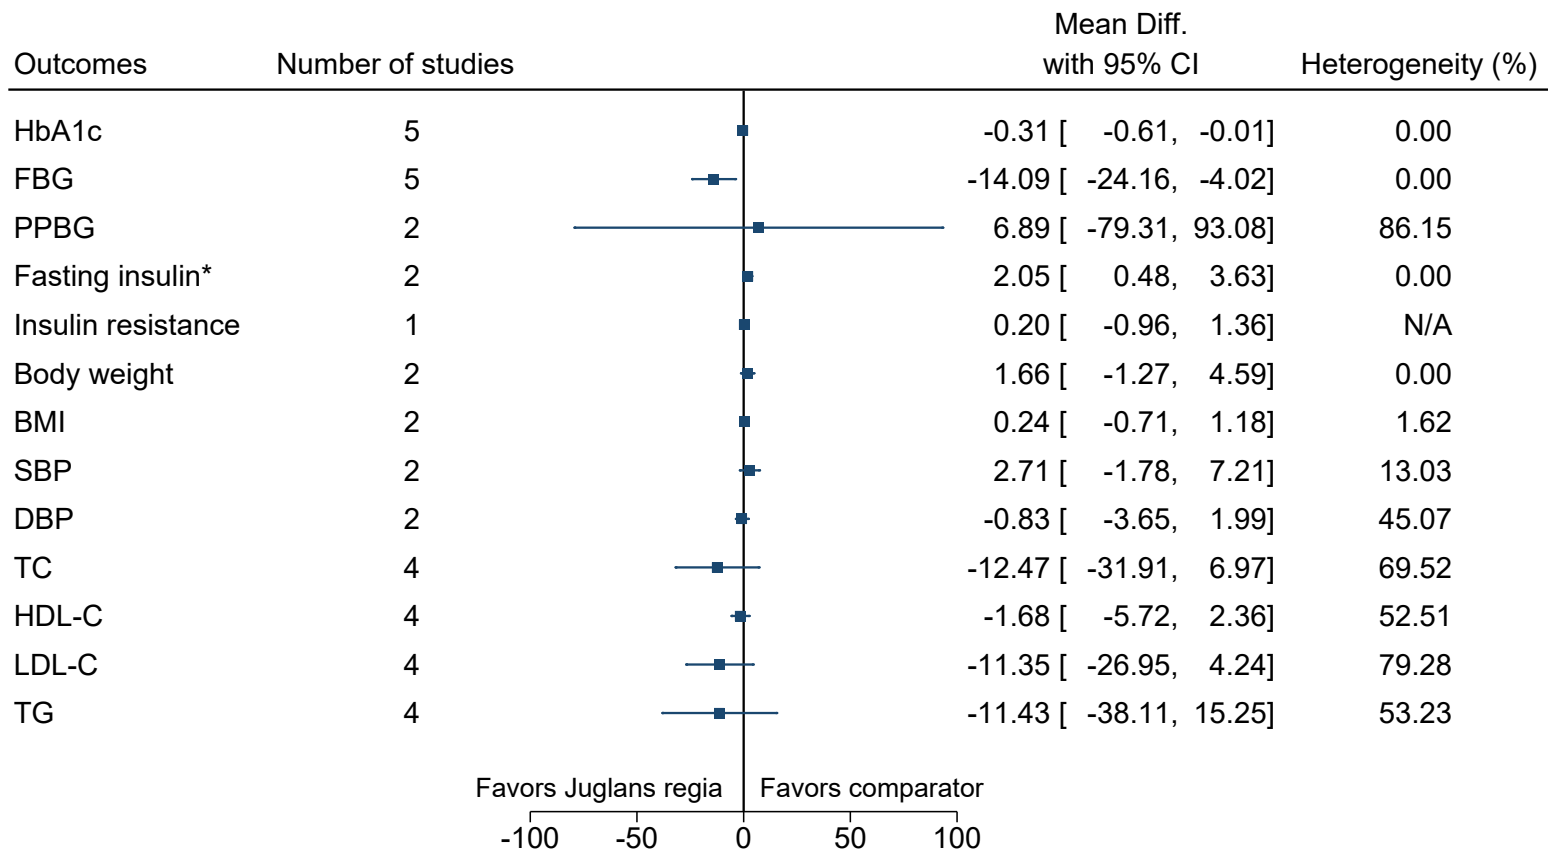

\*Favors intervention/comparator as insulin sensitizer

Supplement: Data_Sheet_1.zip [file Data_Sheet_1.zip]

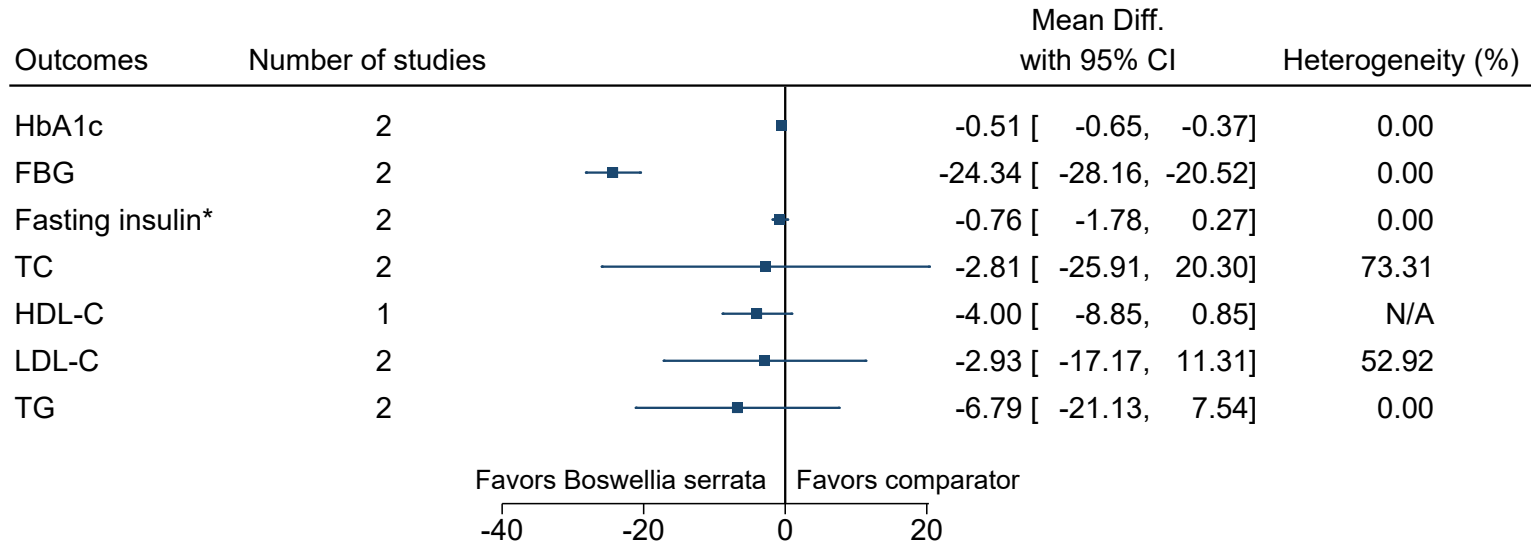

\*Favours intervention/comparator as insulin sensitizer

Supplement: Data_Sheet_1.zip [file Data_Sheet_1.zip]

# Anethum graveolens - HDL-C

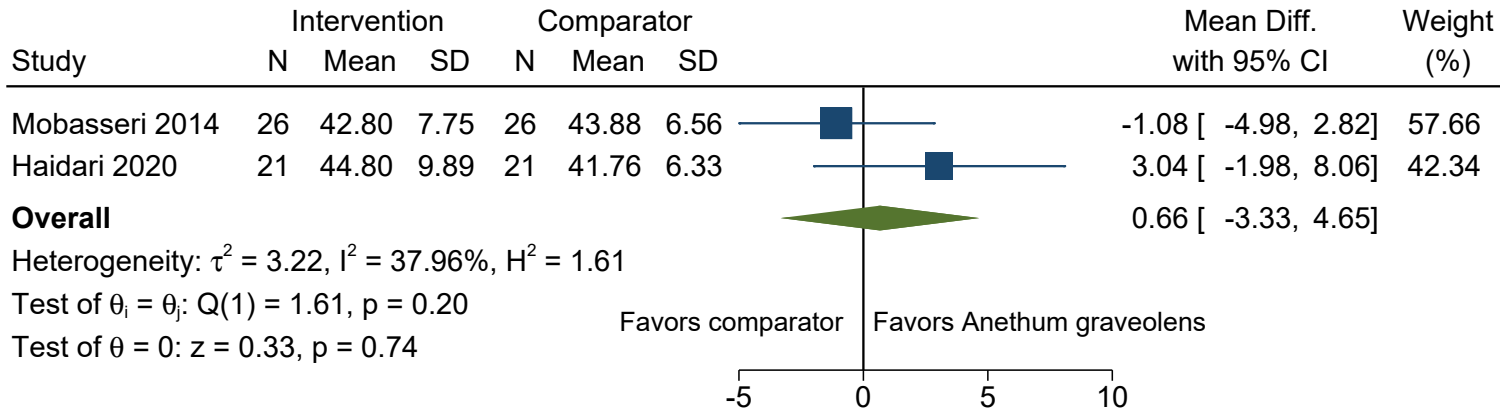

Random-effects REML model

Supplement: Data_Sheet_1.zip [file Data_Sheet_1.zip]

# Coccinia grandis - Waist circumference

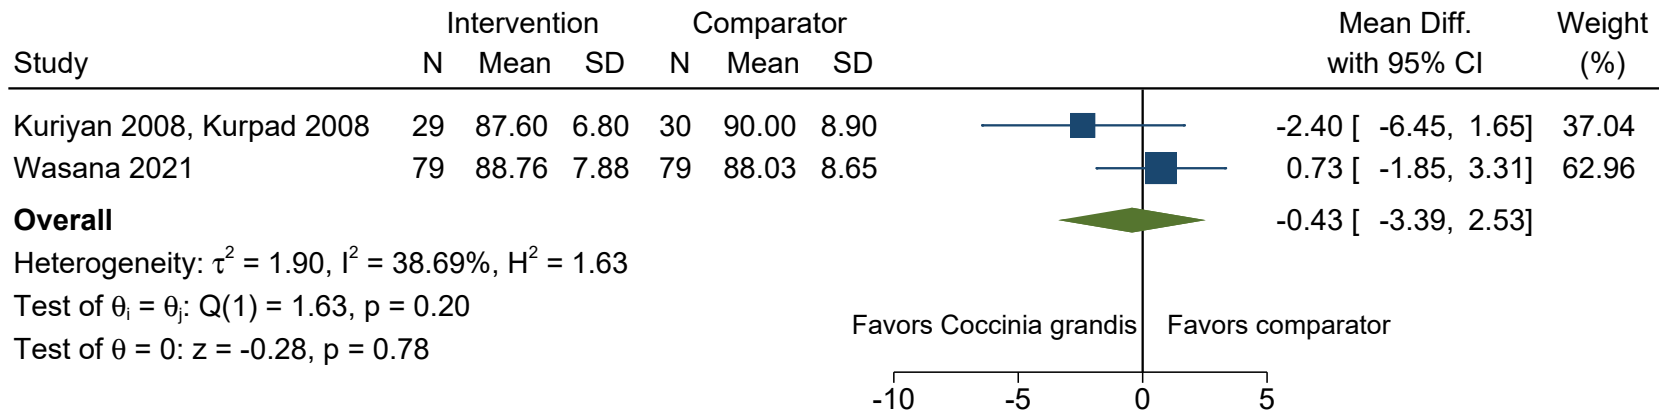

Random-effects REML model

Supplement: Data_Sheet_1.zip [file Data_Sheet_1.zip]

# Crocus sativus - BMI

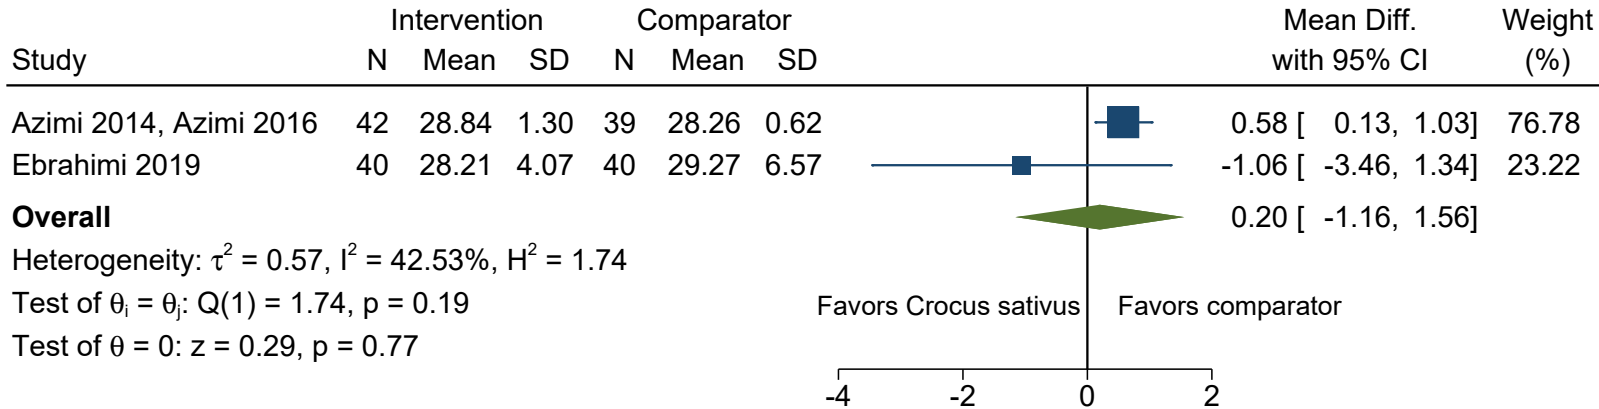

Random-effects REML model

Supplement: Data_Sheet_1.zip [file Data_Sheet_1.zip]

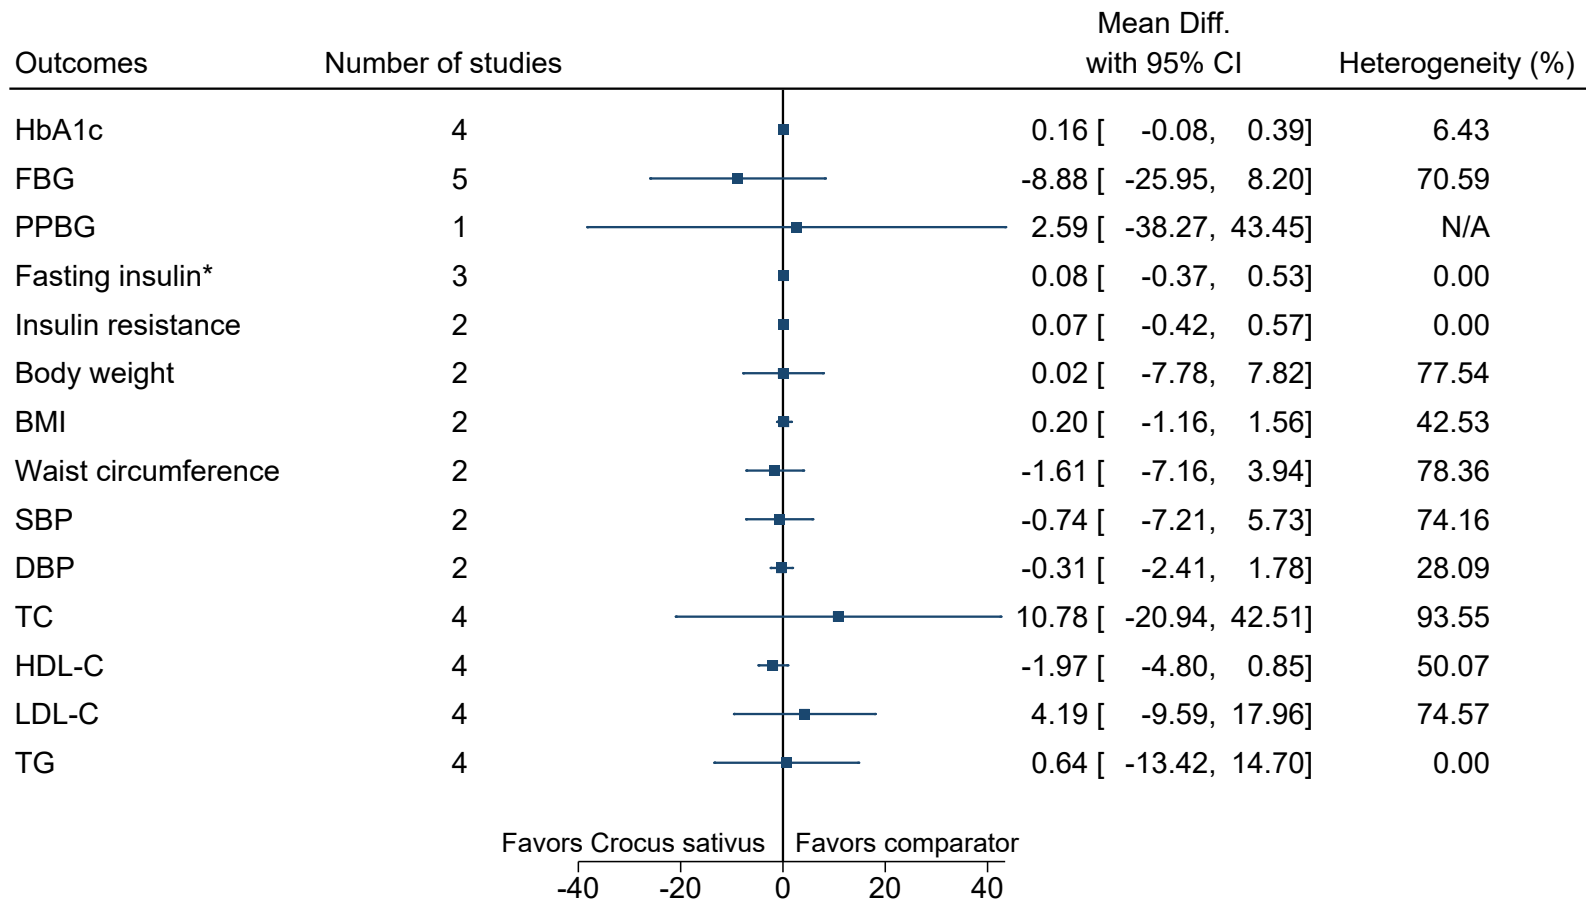

\*Favors intervention/comparator as insulin sensitizer

Supplement: Data_Sheet_1.zip [file Data_Sheet_1.zip]

# Citrullus colocynthis - HbA1c

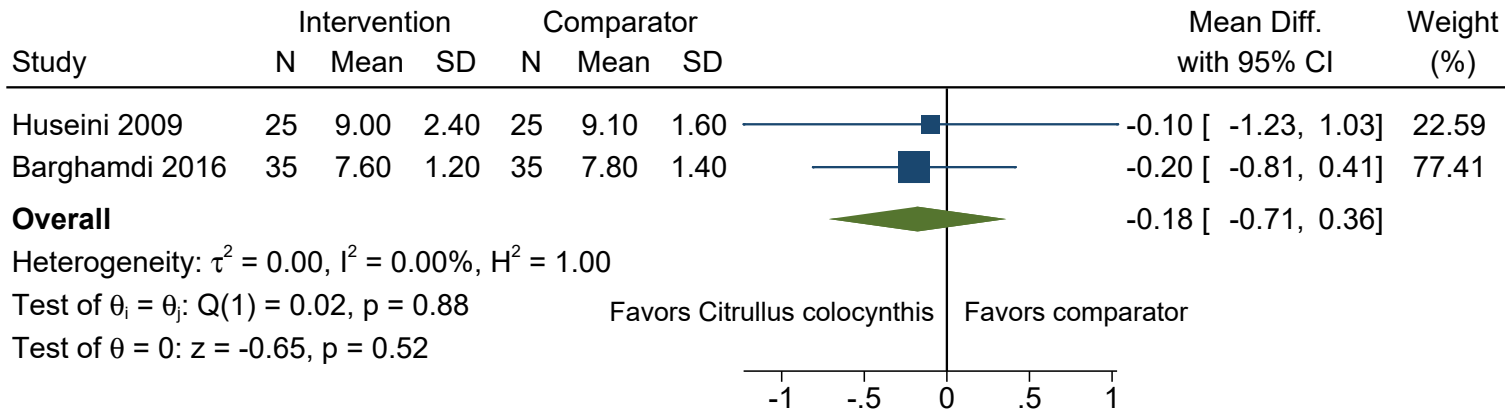

Random-effects REML model

Supplement: Data_Sheet_1.zip [file Data_Sheet_1.zip]

Juglans regia - TG

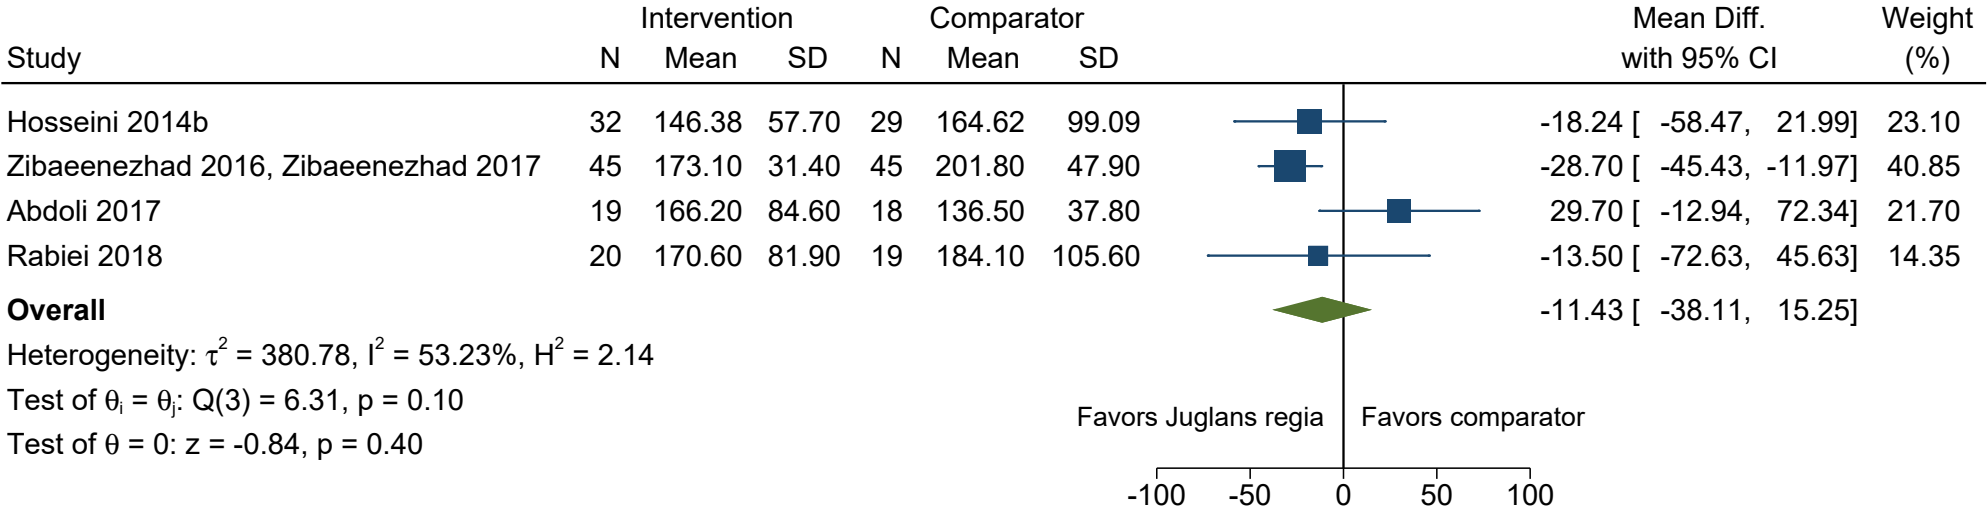

Supplement: Data_Sheet_1.zip [file Data_Sheet_1.zip]

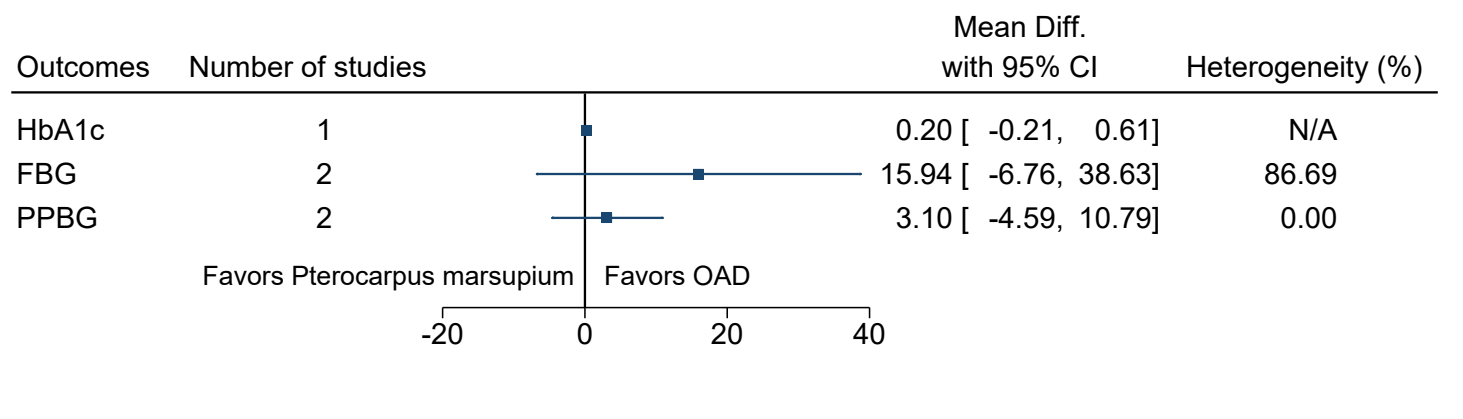

Supplement: Data_Sheet_1.zip [file Data_Sheet_1.zip]

# Coccinia grandis - BMI

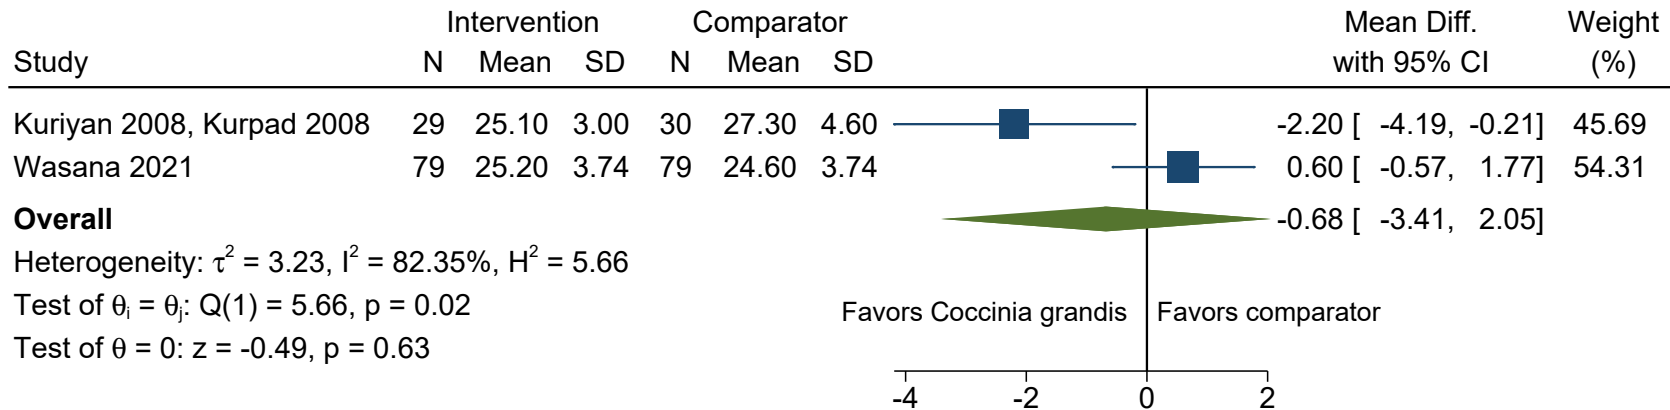

Random-effects REML model

Supplement: Data_Sheet_1.zip [file Data_Sheet_1.zip]

# Ipomoea batatas -TG

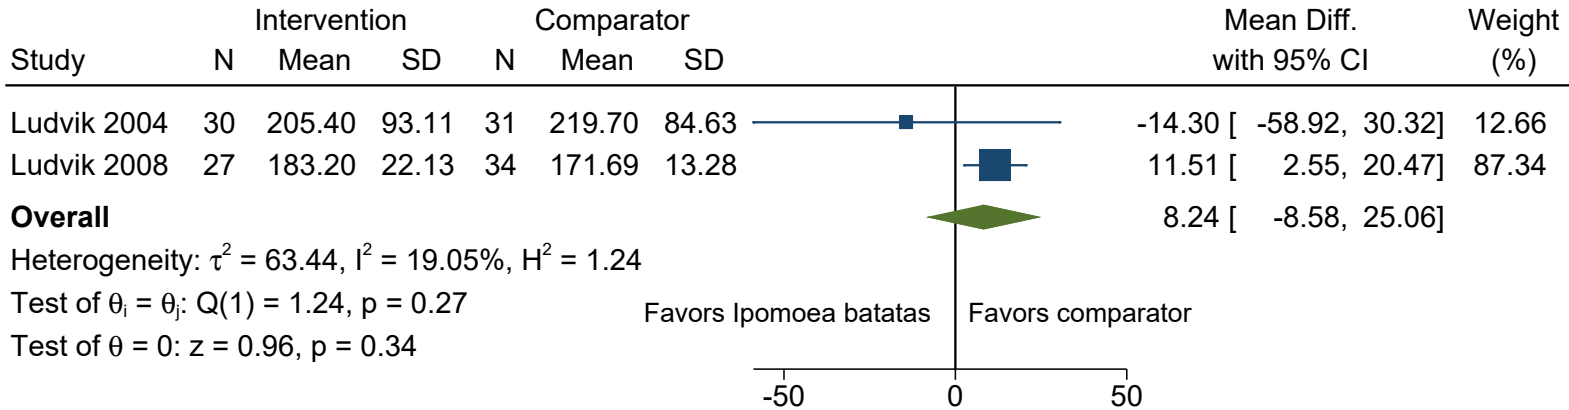

Random-effects REML model

Supplement: Data_Sheet_1.zip [file Data_Sheet_1.zip]

# Syzygium cumini - HbA1c

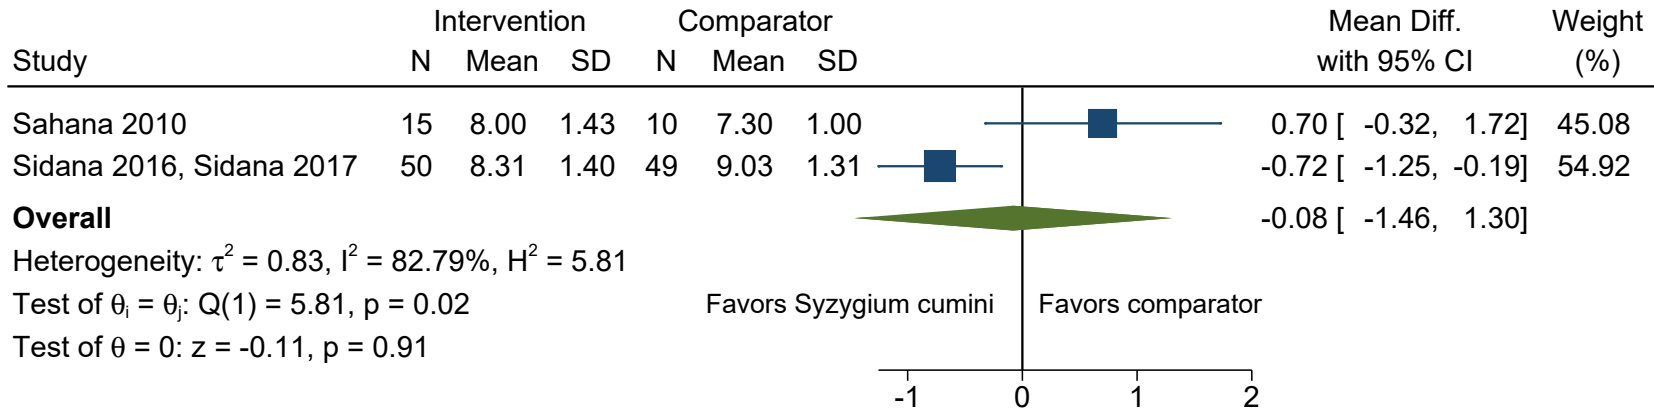

Random-effects REML model

Supplement: Data_Sheet_1.zip [file Data_Sheet_1.zip]

# Juglans regia - DBP

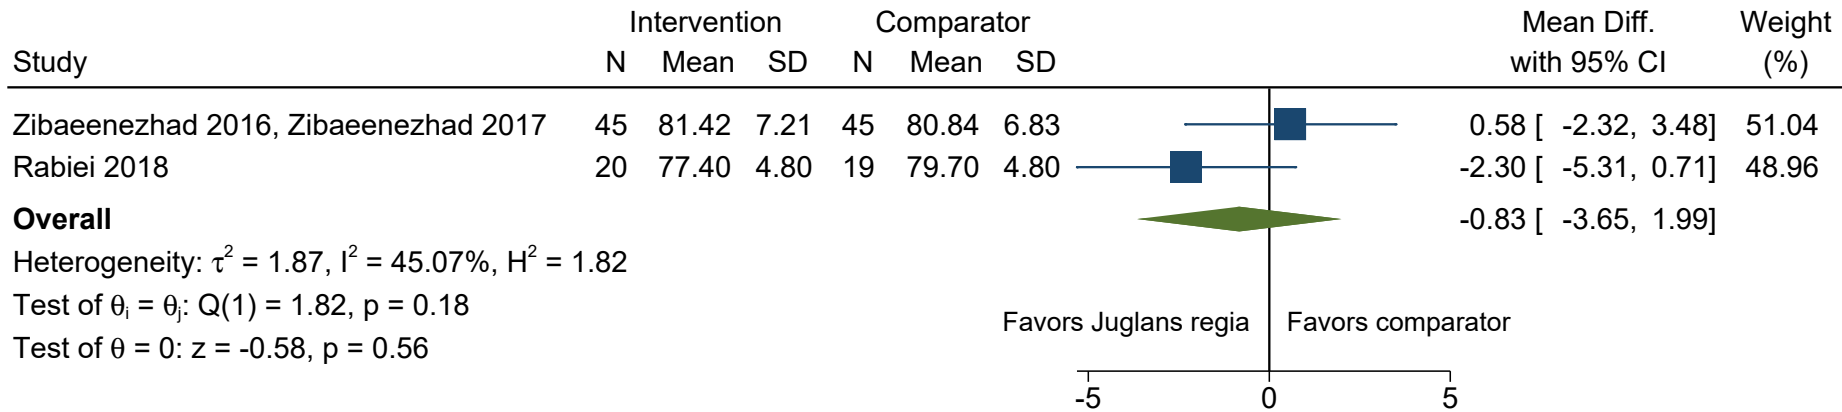

Random-effects REML model

Supplement: Data_Sheet_1.zip [file Data_Sheet_1.zip]

# Curcuma longa - TG

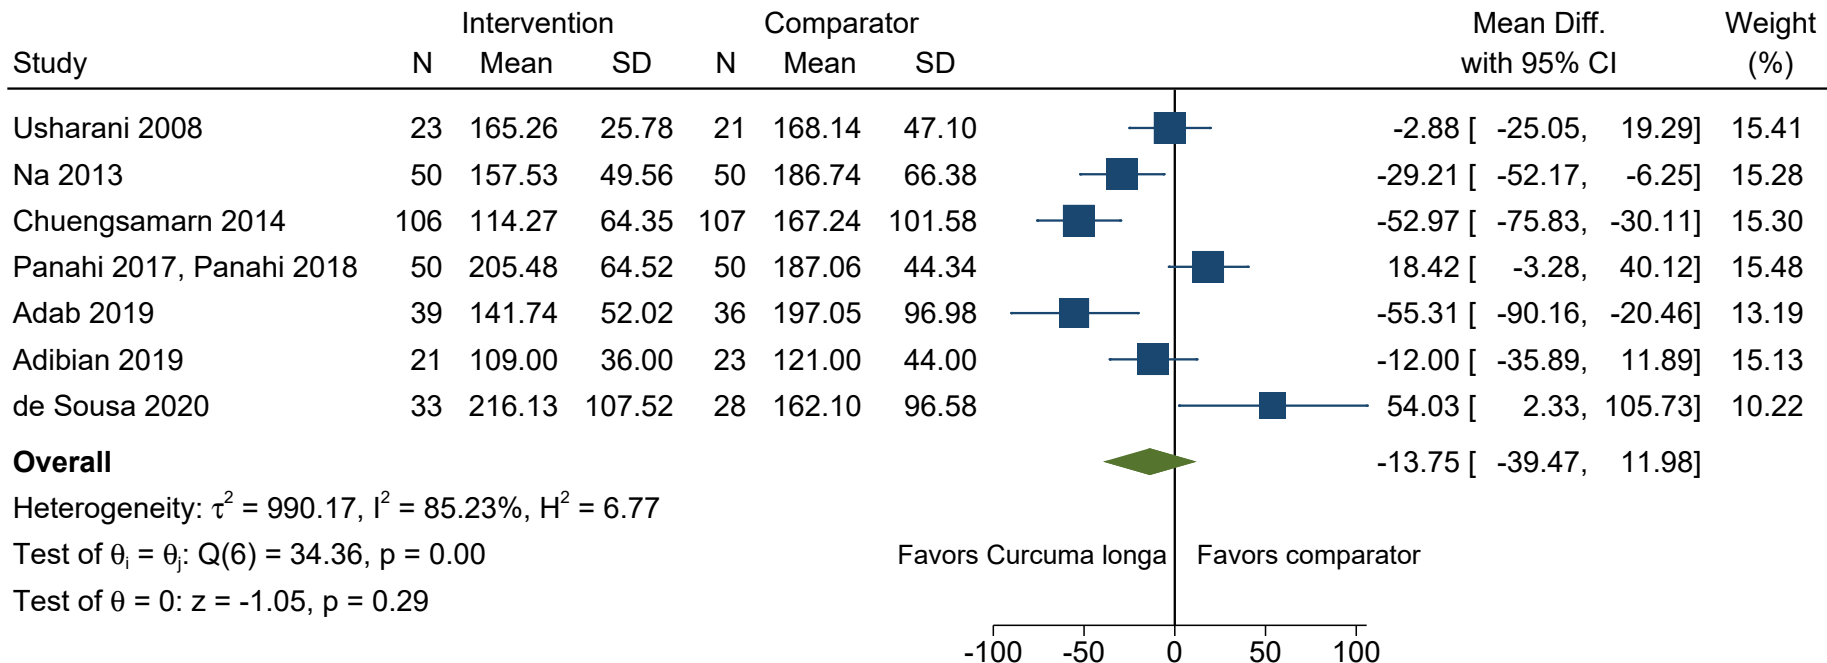

Supplement: Data_Sheet_1.zip [file Data_Sheet_1.zip]

# Crocus sativus - Fasting insulin

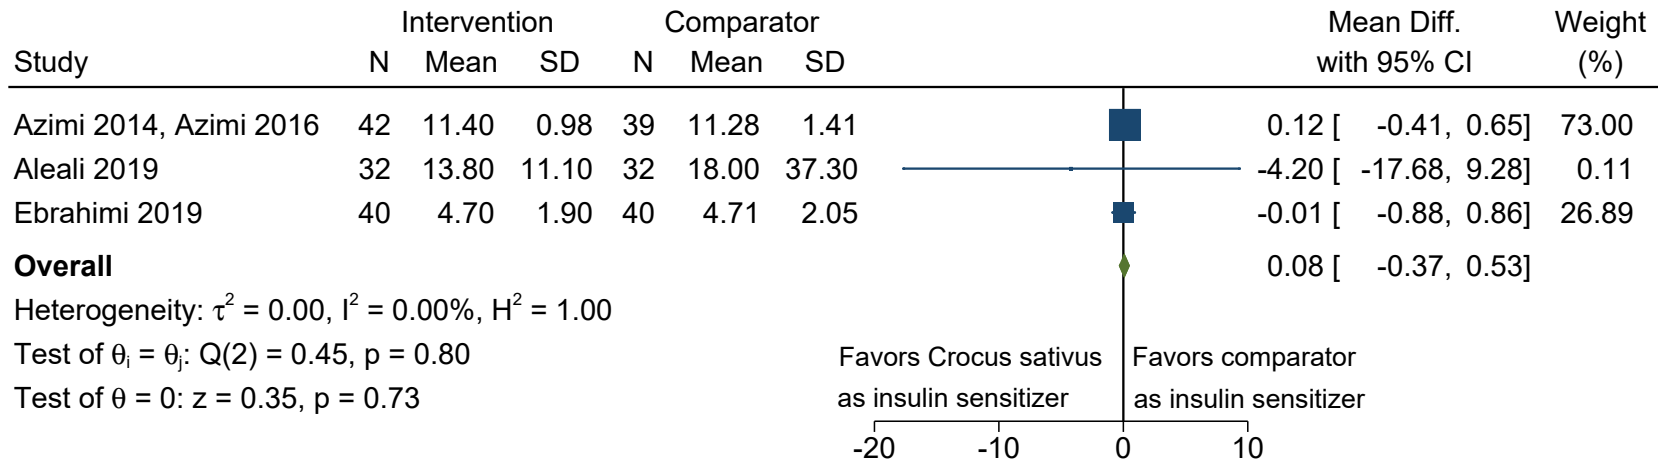

Supplement: Data_Sheet_1.zip [file Data_Sheet_1.zip]

# Nigella sativa - Fasting insulin

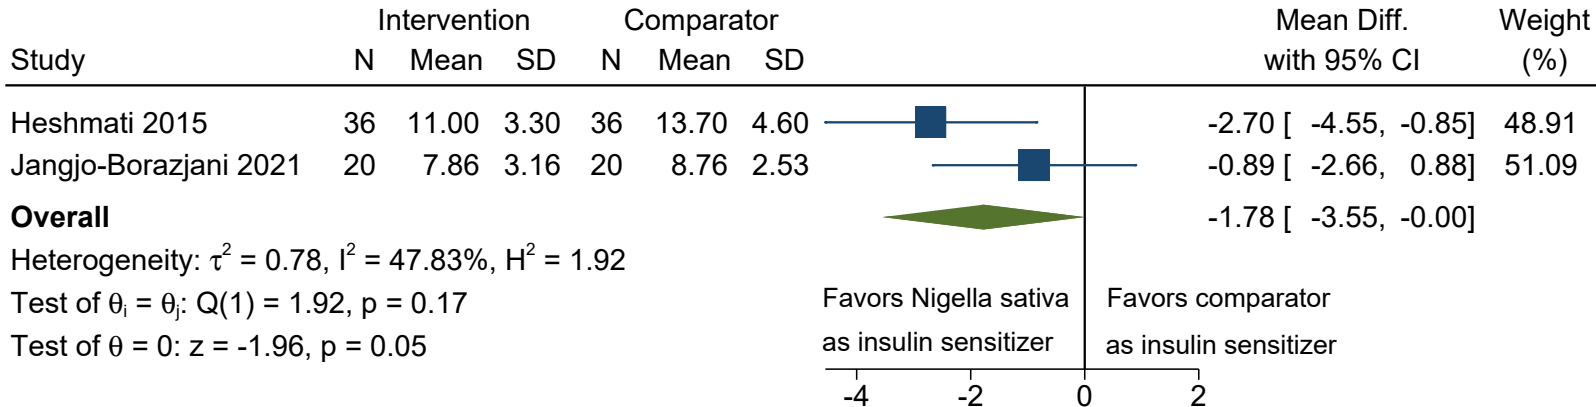

Random-effects REML model

Supplement: Data_Sheet_1.zip [file Data_Sheet_1.zip]

# Boswellia serrata - FBG

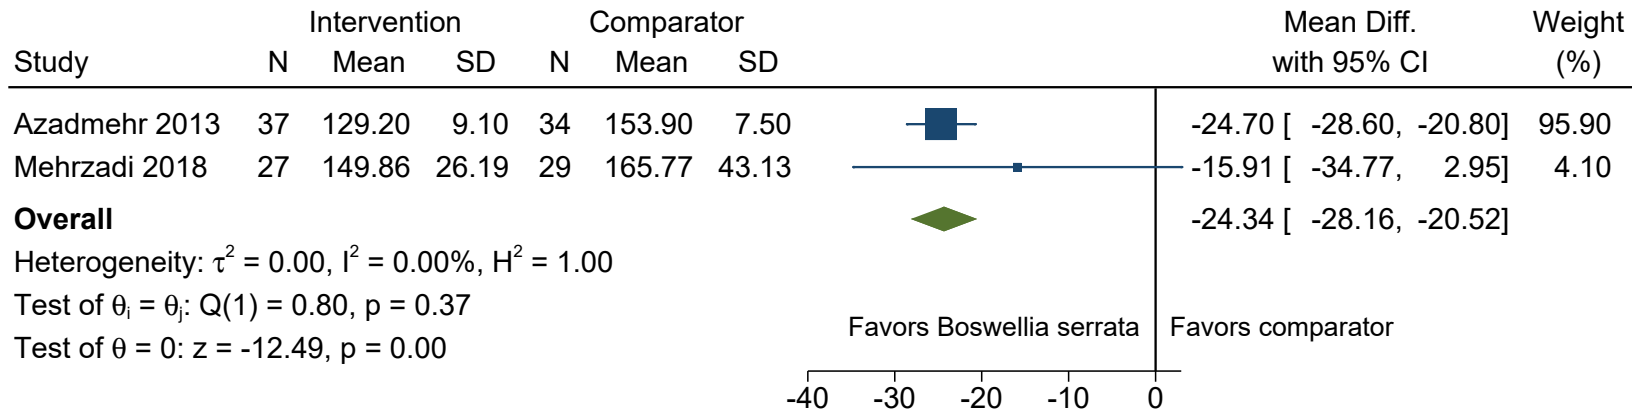

Random-effects REML model

Supplement: Data_Sheet_1.zip [file Data_Sheet_1.zip]

# Cinnamomum aromaticum - DBP

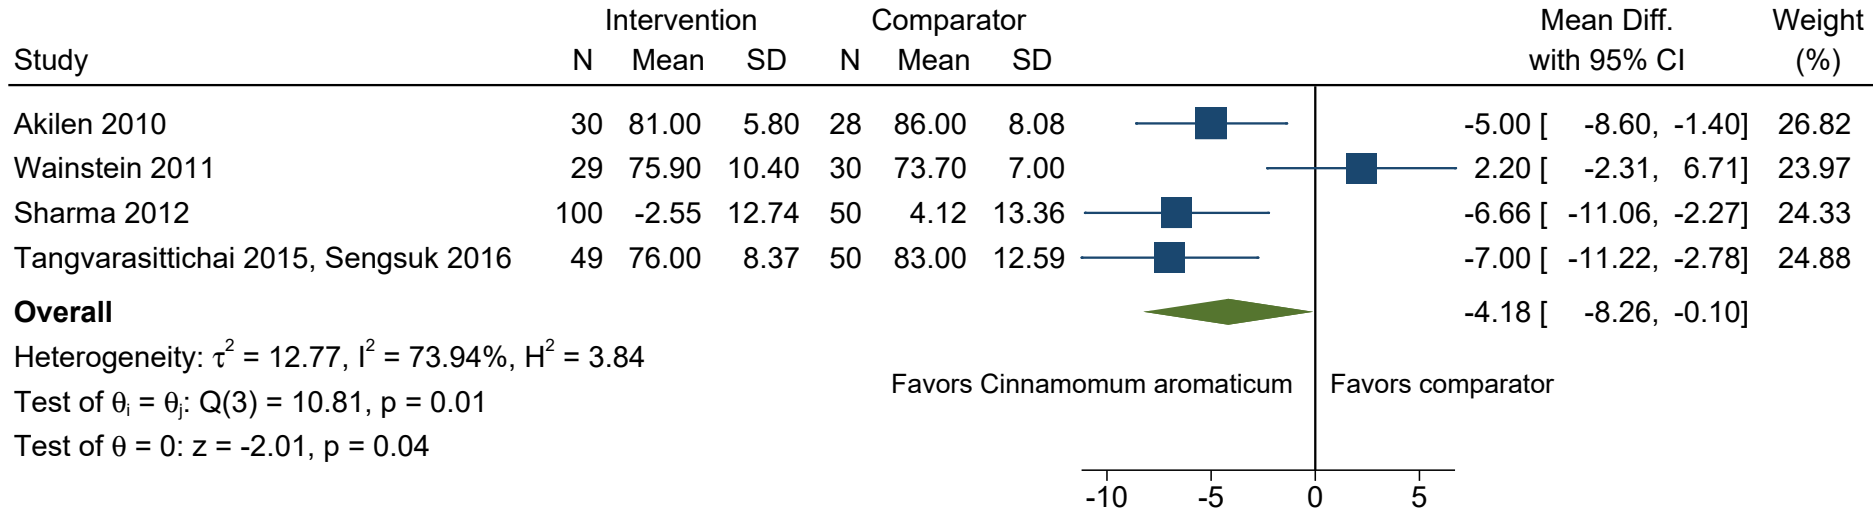

Random-effects REML model

Supplement: Data_Sheet_1.zip [file Data_Sheet_1.zip]

# Trigonella foenum-graecum - HbA1c - comparator subgroup analysis

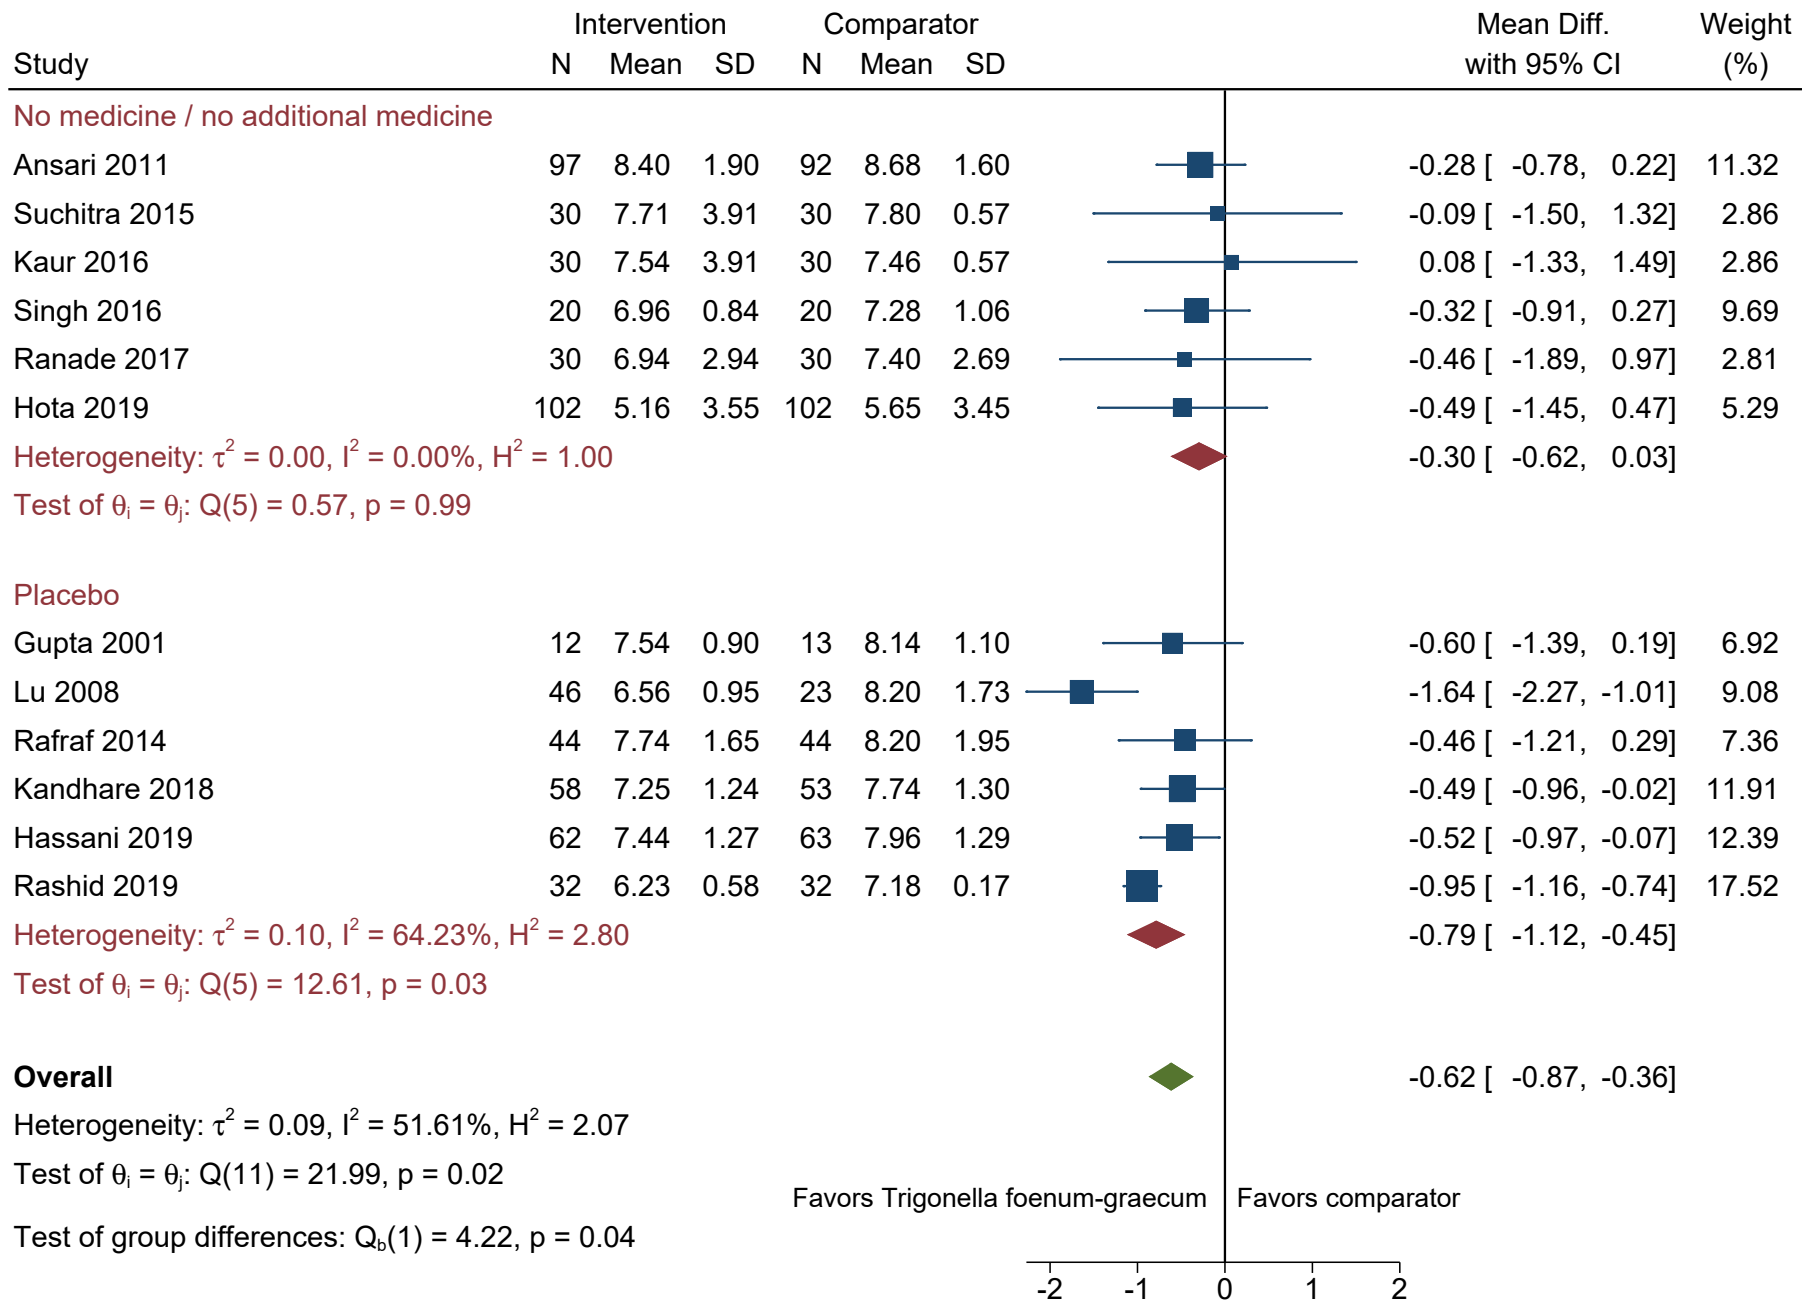

Supplement: Data_Sheet_1.zip [file Data_Sheet_1.zip]

# Curcuma longa - Insulin resistance

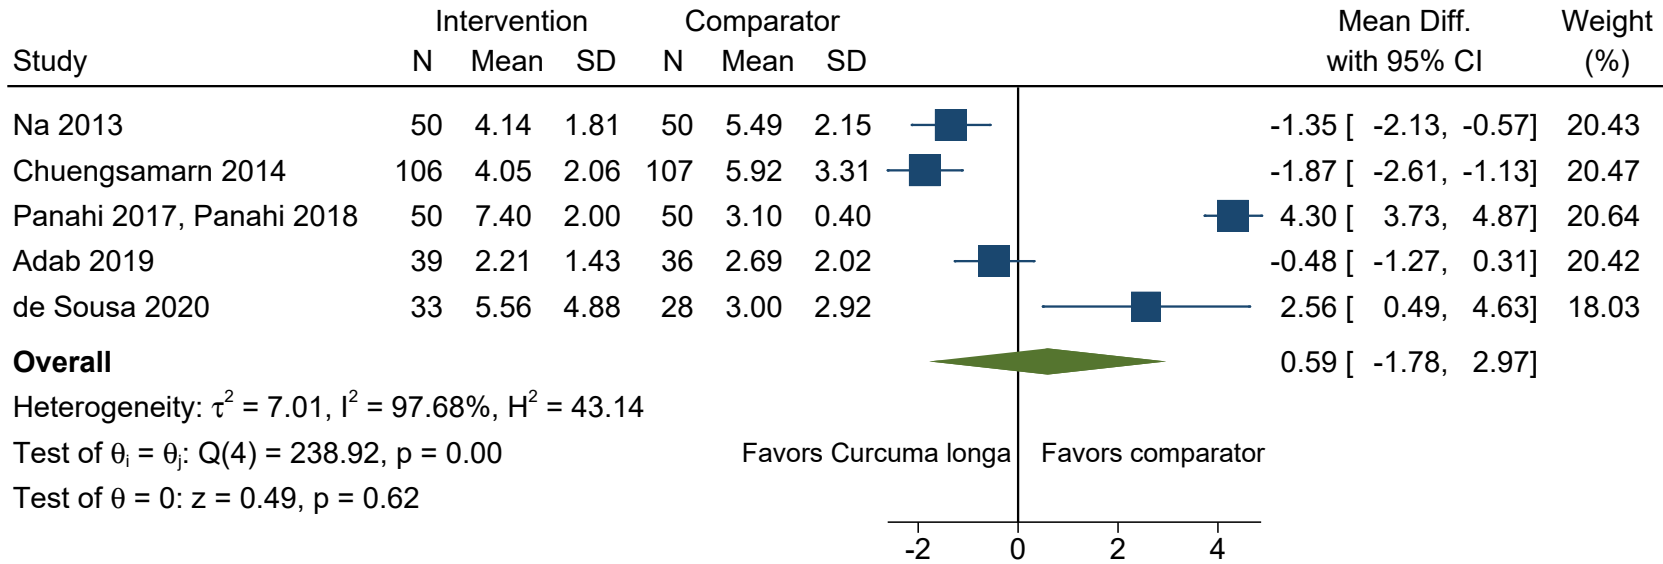

Random-effects REML model

Supplement: Data_Sheet_1.zip [file Data_Sheet_1.zip]

# Cinnamomum aromaticum - HbA1c

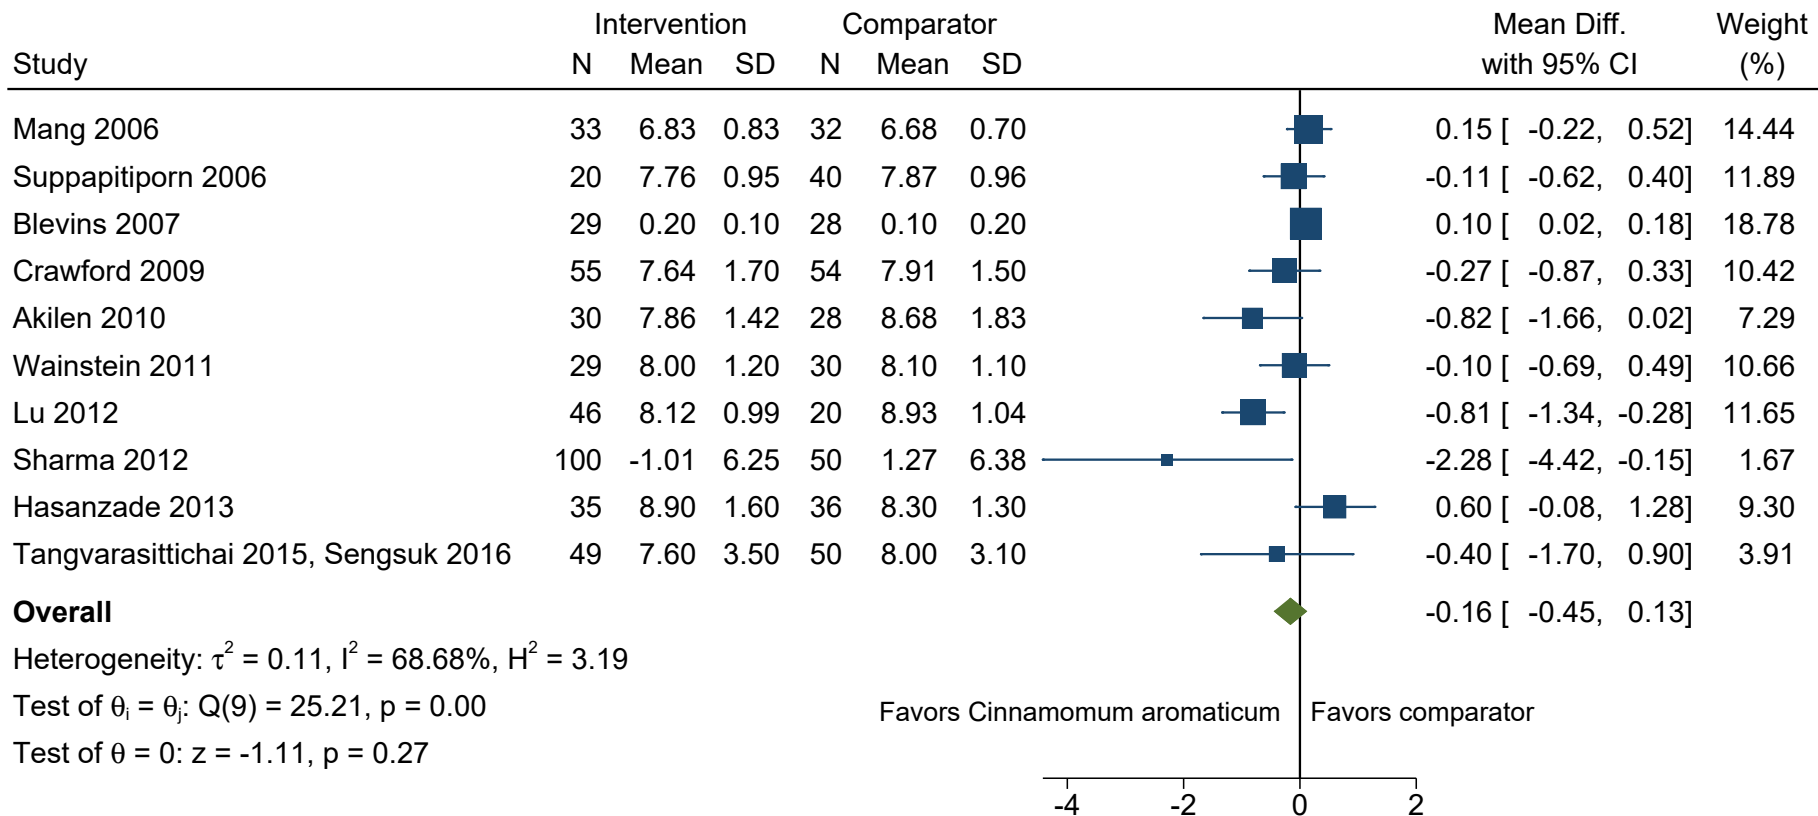

Supplement: Data_Sheet_1.zip [file Data_Sheet_1.zip]

# Punica granatum - Waist circumference

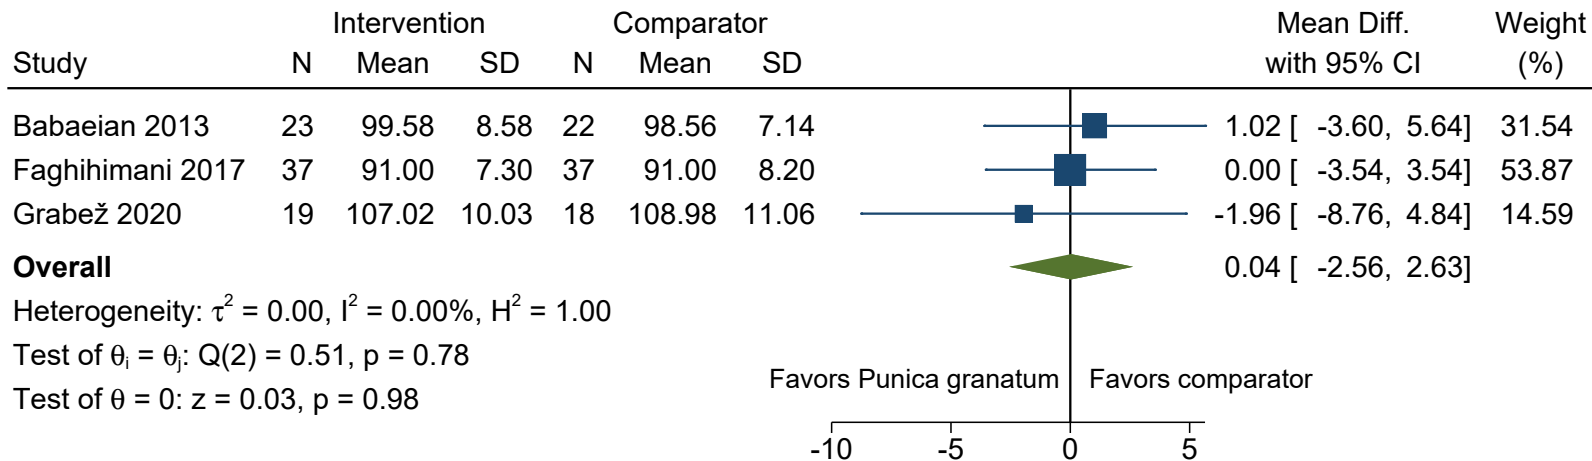

Random-effects REML model

Supplement: Data_Sheet_1.zip [file Data_Sheet_1.zip]

# Enicostemma axillare - FBG

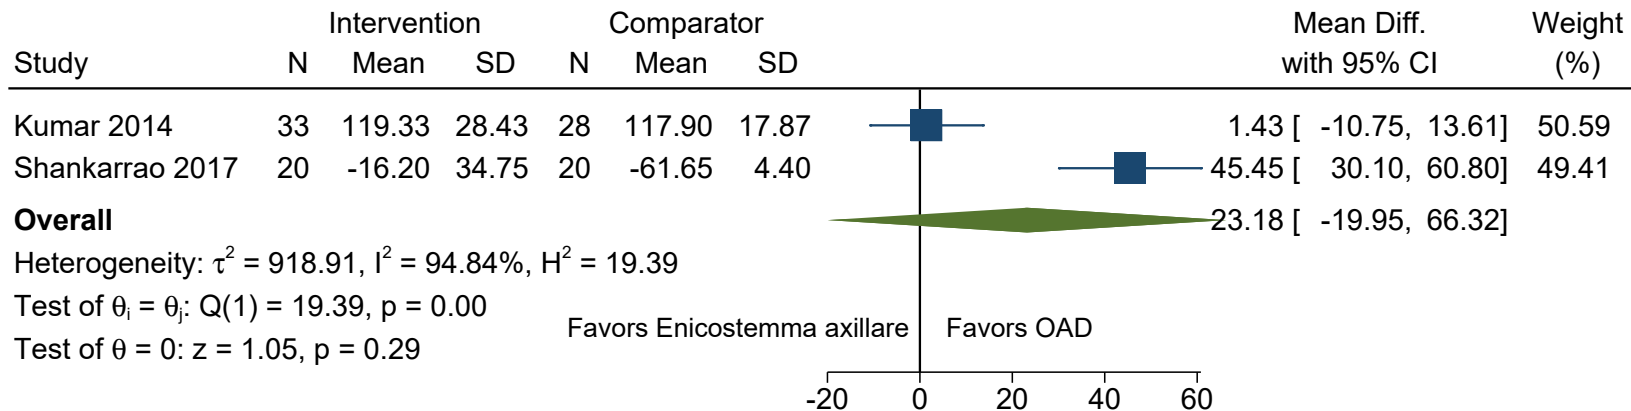

Random-effects REML model

Supplement: Data_Sheet_1.zip [file Data_Sheet_1.zip]

# Punica granatum - HDL-C

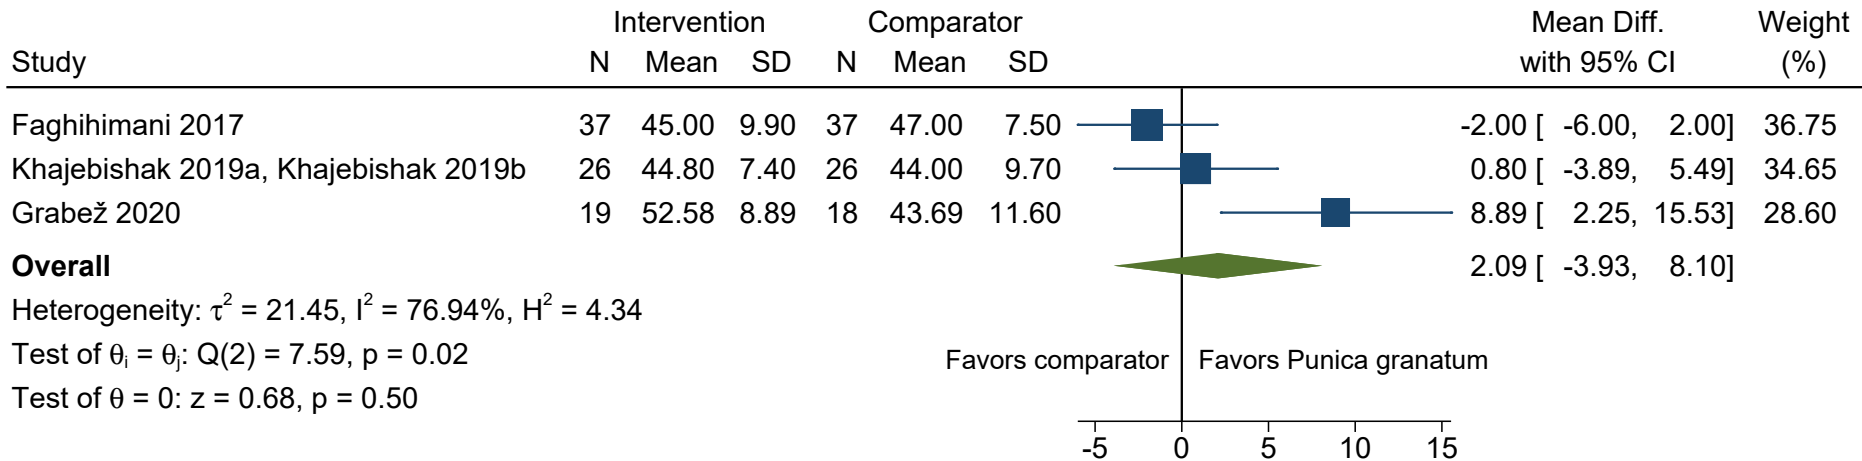

Random-effects REML model

Supplement: Data_Sheet_1.zip [file Data_Sheet_1.zip]

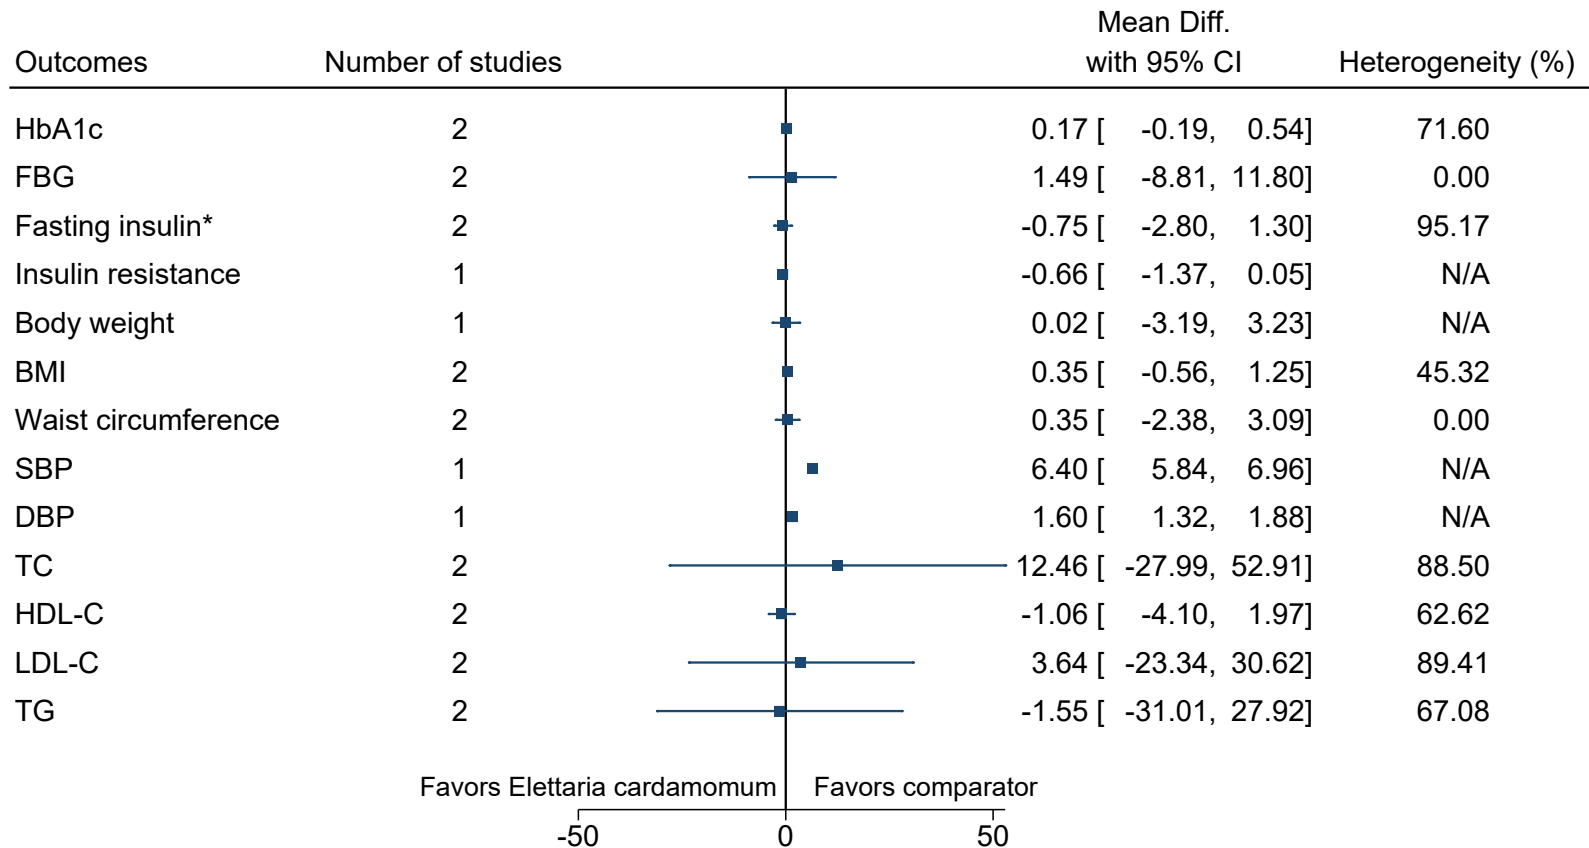

\*Favours intervention/comparator as insulin sensitizer

Supplement: Data_Sheet_1.zip [file Data_Sheet_1.zip]

# Elettaria cardamomum - FBG

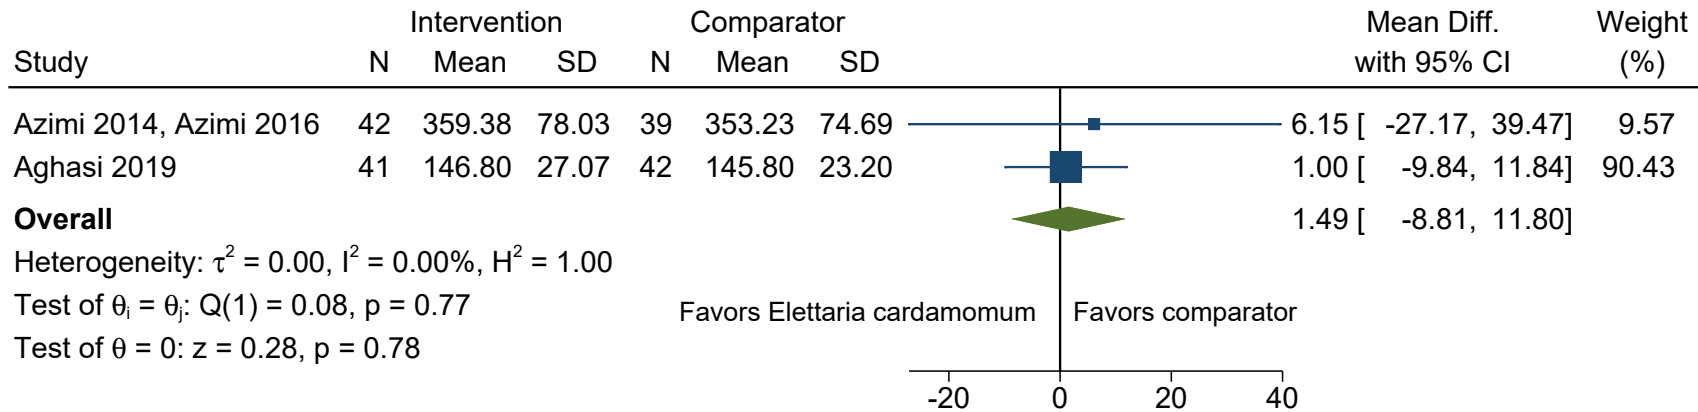

Random-effects REML model

Supplement: Data_Sheet_1.zip [file Data_Sheet_1.zip]

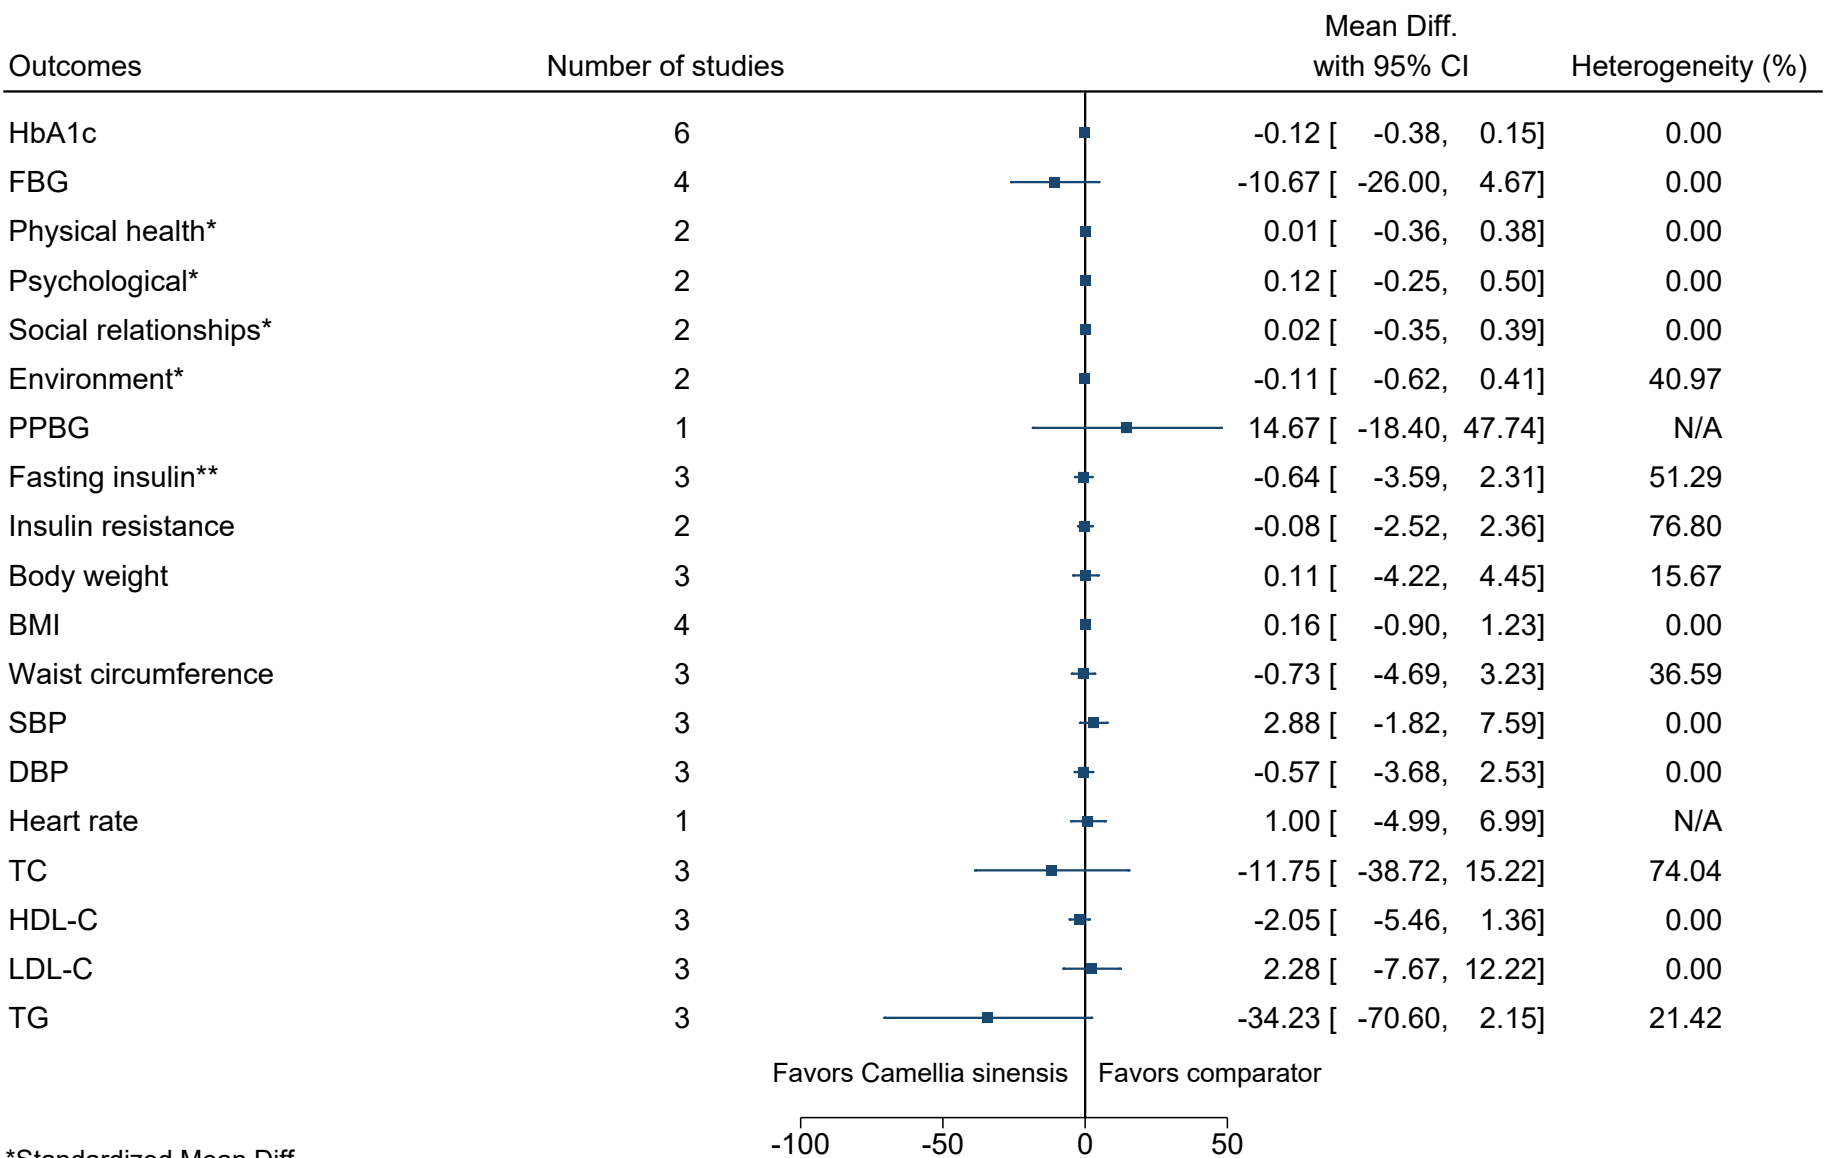

\*Standardized Mean Diff.  
\*\*Favors intervention/comparator as insulin sensitizer

Supplement: Data_Sheet_1.zip [file Data_Sheet_1.zip]

# Camellia sinensis - TG

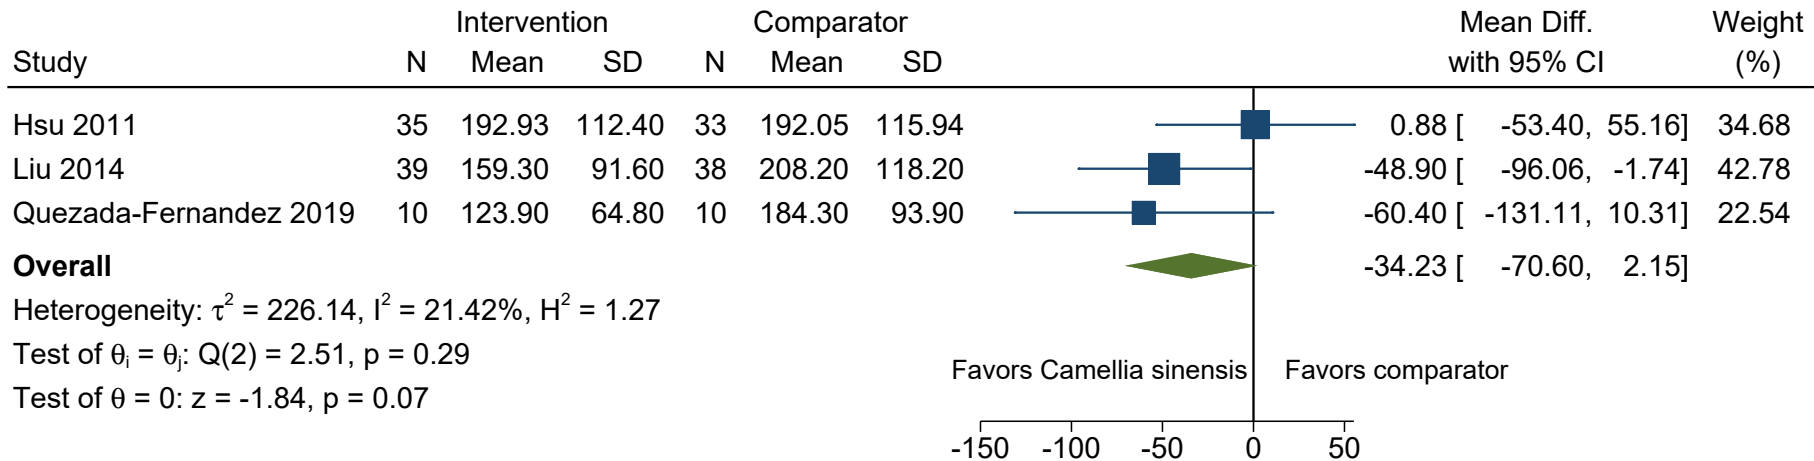

Random-effects REML model

Supplement: Data_Sheet_1.zip [file Data_Sheet_1.zip]

# Gynostemma pentaphyllum - Insulin resistance



Random-effects REML model

Supplement: Data_Sheet_1.zip [file Data_Sheet_1.zip]

# Azadirachta indica - LDL-C

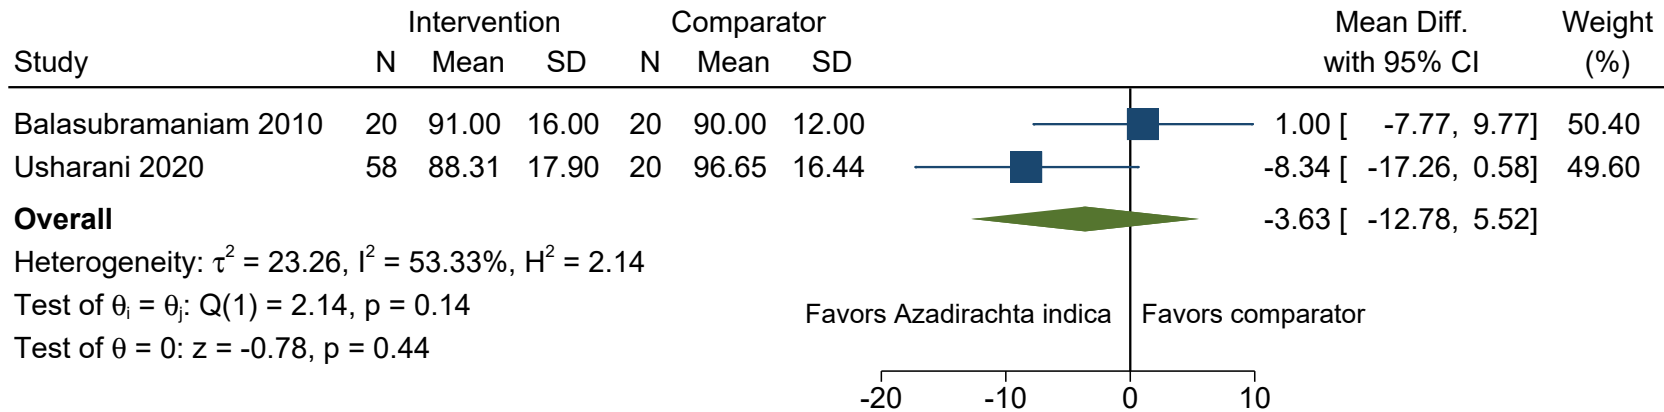

Random-effects REML model

Supplement: Data_Sheet_1.zip [file Data_Sheet_1.zip]

# Nigella sativa - HDL-C

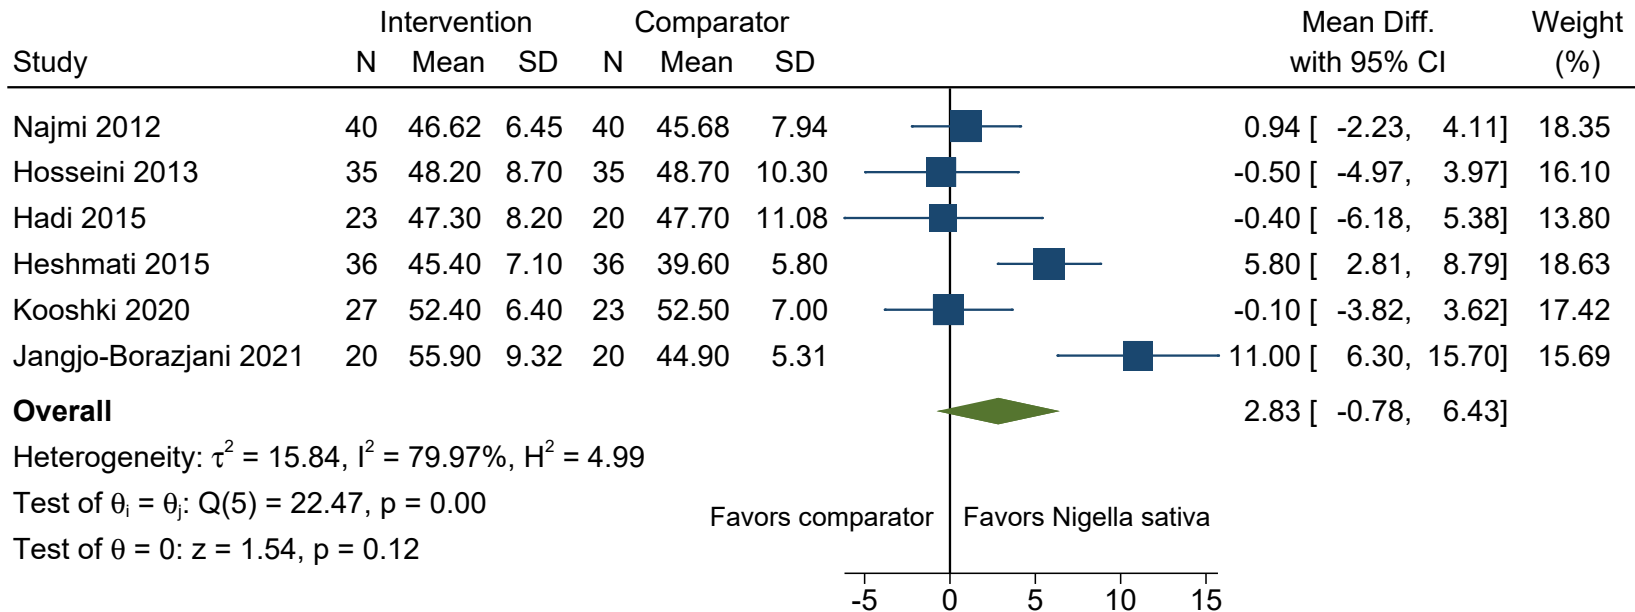

Random-effects REML model

Supplement: Data_Sheet_1.zip [file Data_Sheet_1.zip]

# Momordica charantia - HbA1c

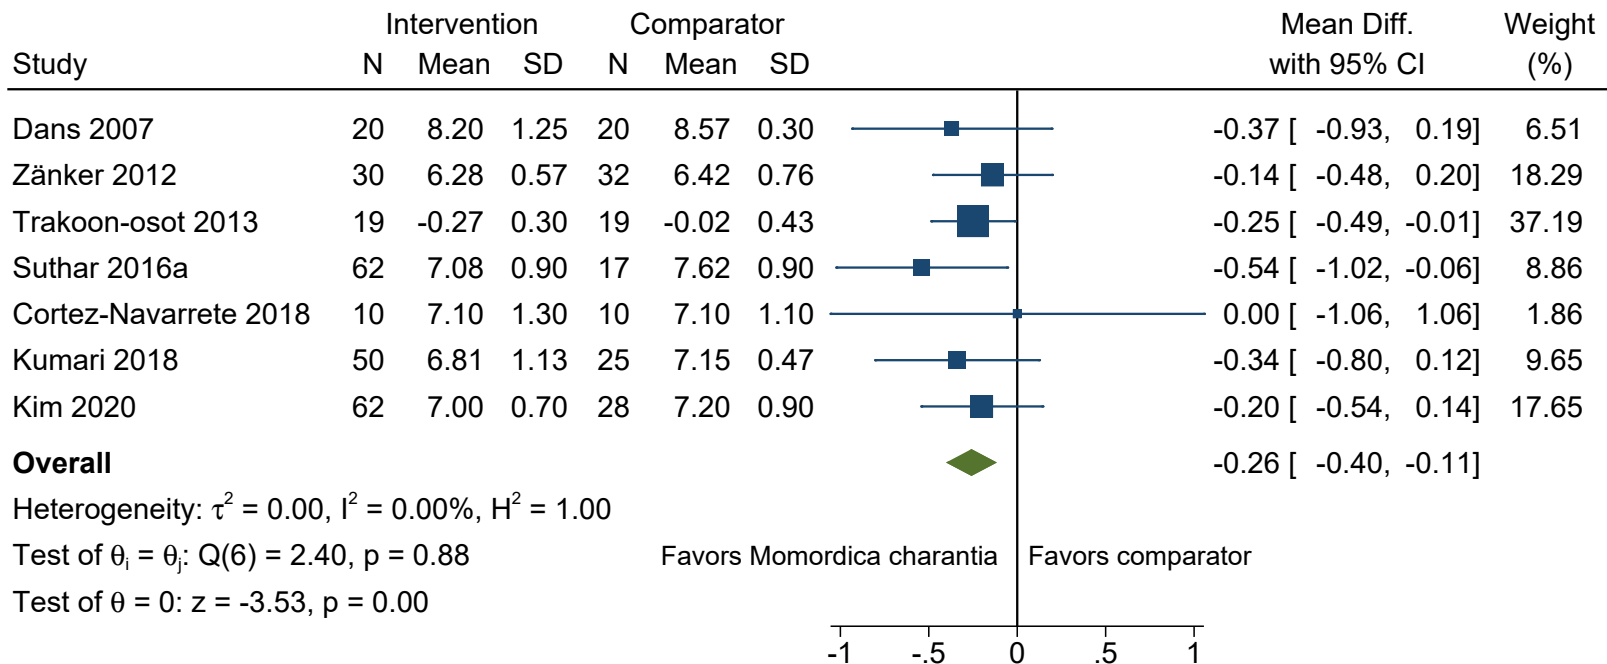

Supplement: Data_Sheet_1.zip [file Data_Sheet_1.zip]

# Aloe vera - TC

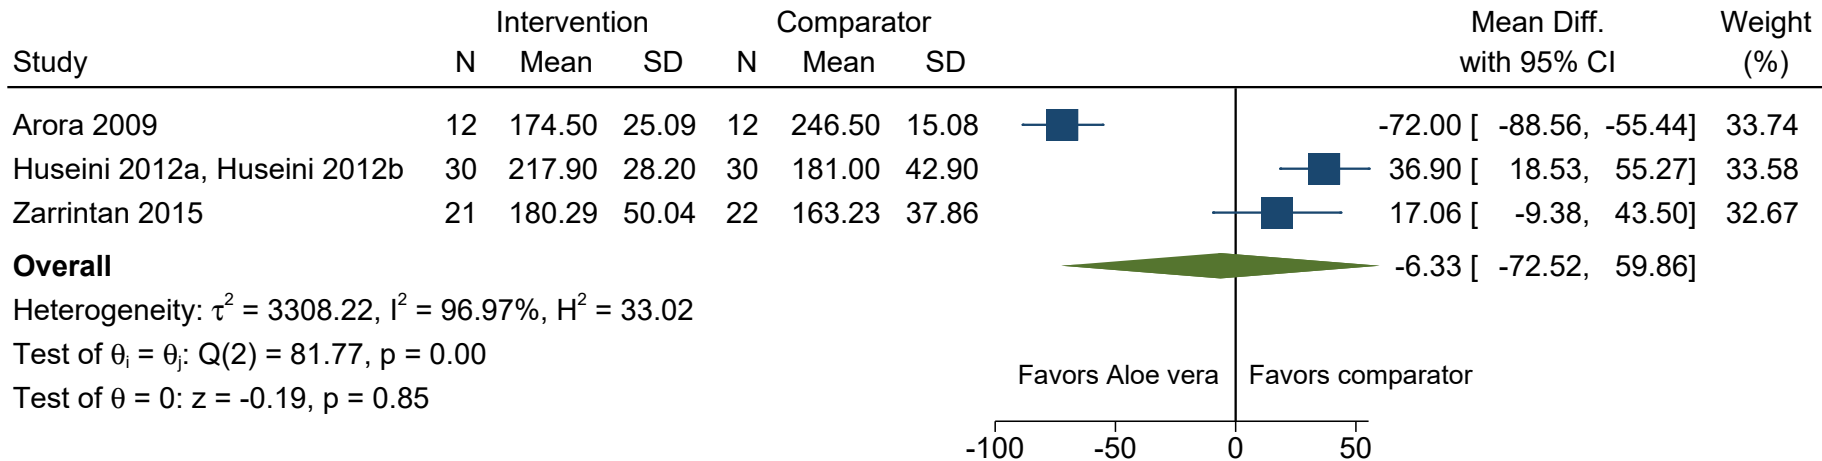

Random-effects REML model

Supplement: Data_Sheet_1.zip [file Data_Sheet_1.zip]

Urtica dioica - SBP

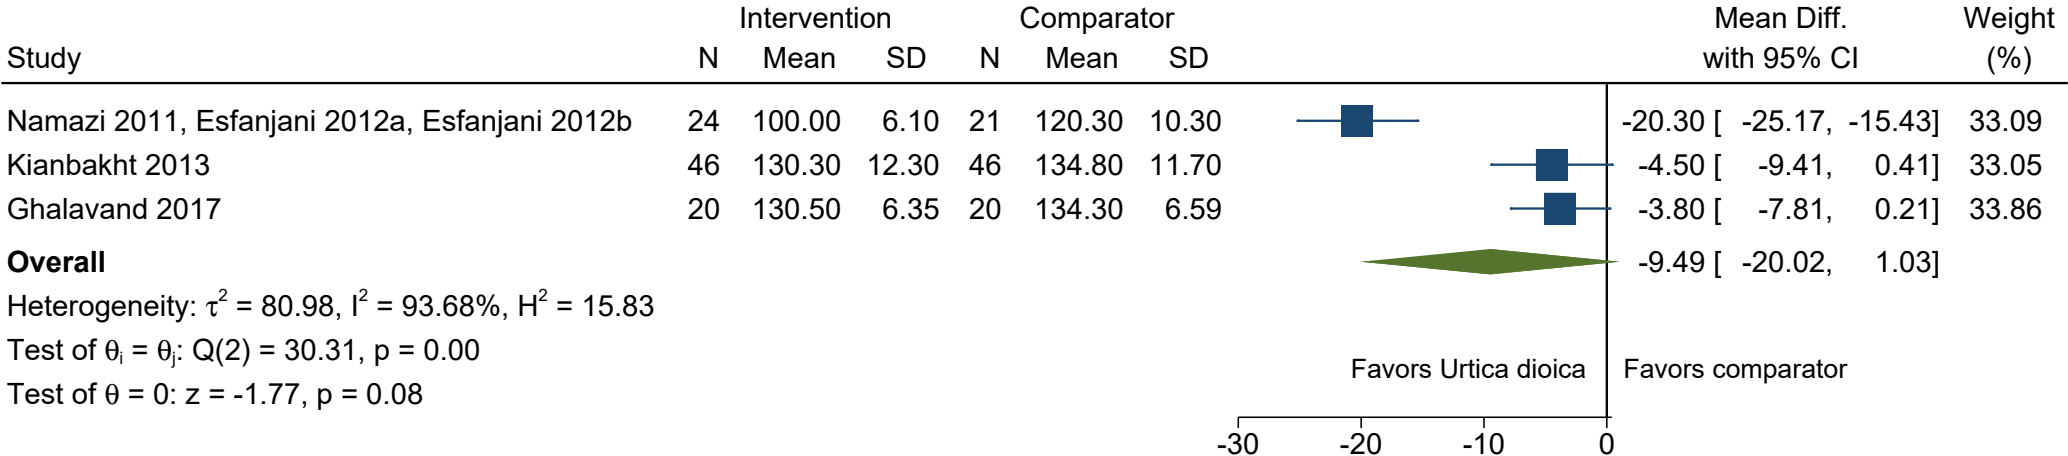

Random-effects REML model

Supplement: Data_Sheet_1.zip [file Data_Sheet_1.zip]

# Nigella sativa - Insulin resistance

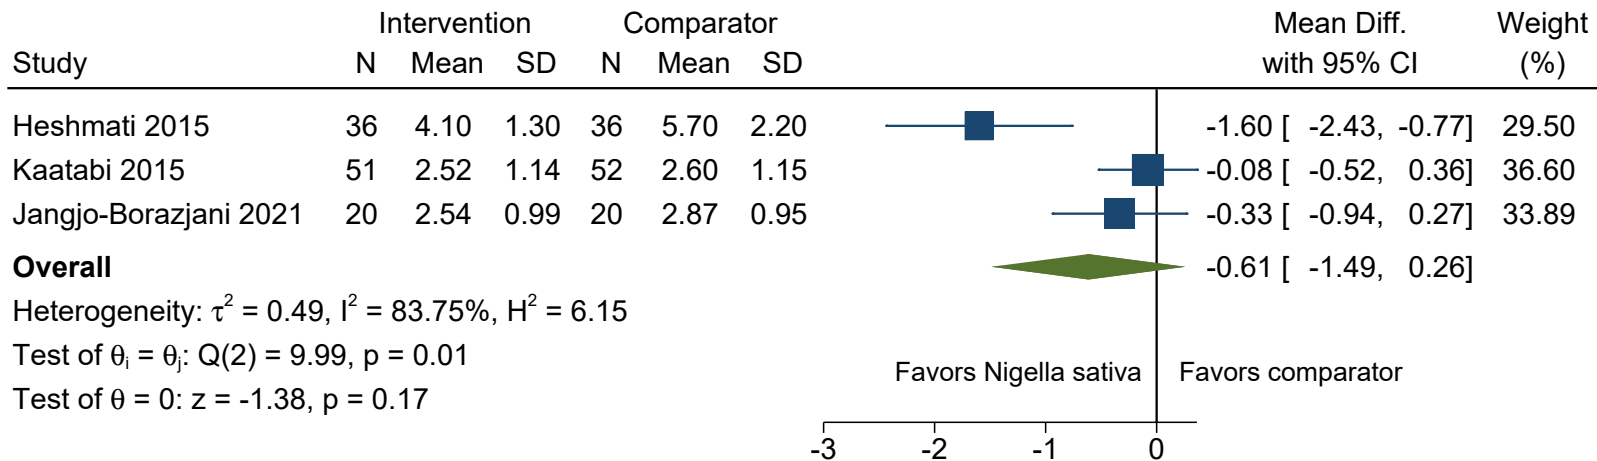

Random-effects REML model

Supplement: Data_Sheet_1.zip [file Data_Sheet_1.zip]

# Coccinia grandis - HDL-C

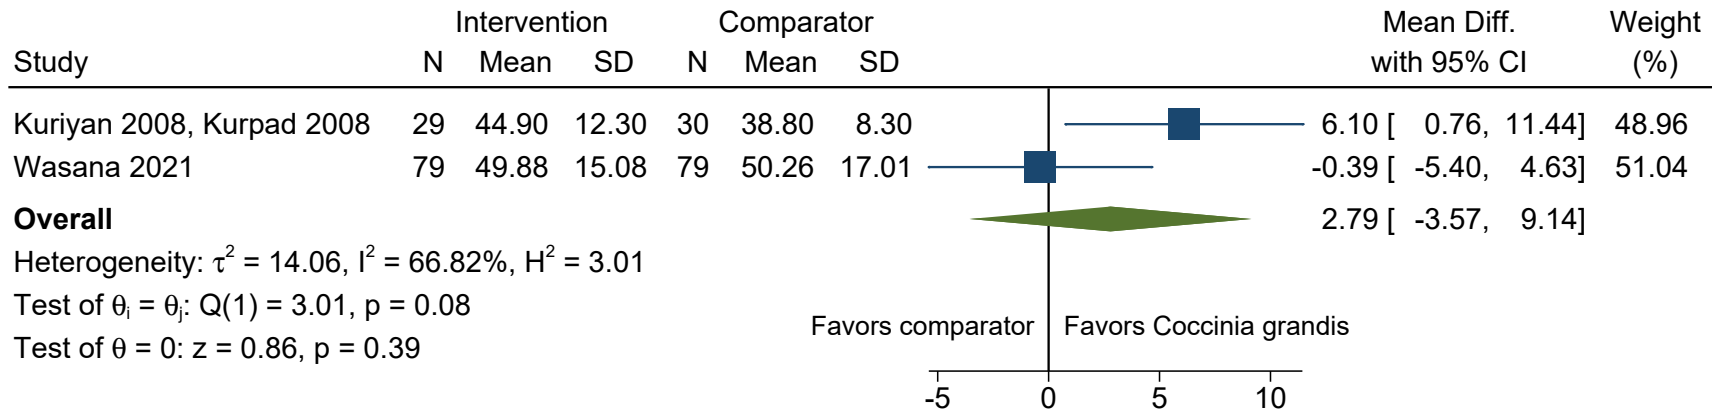

Random-effects REML model

Supplement: Data_Sheet_1.zip [file Data_Sheet_1.zip]

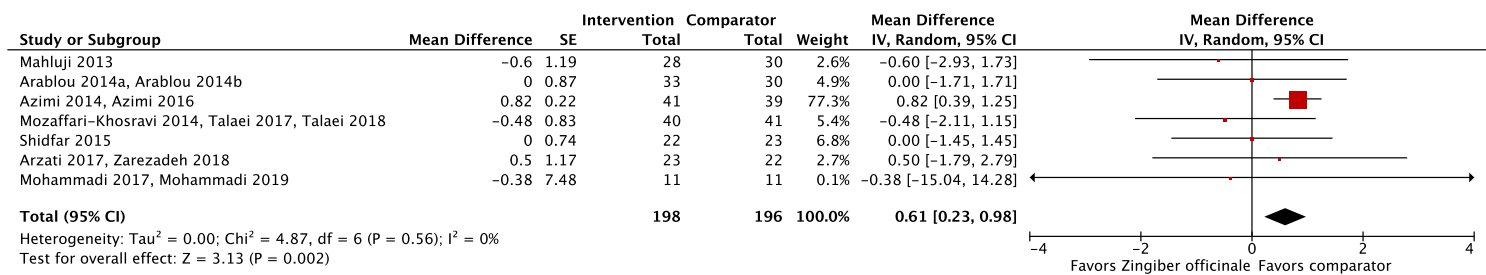

Supplement: Data_Sheet_1.zip [file Data_Sheet_1.zip]

# Crocus sativus - FBG

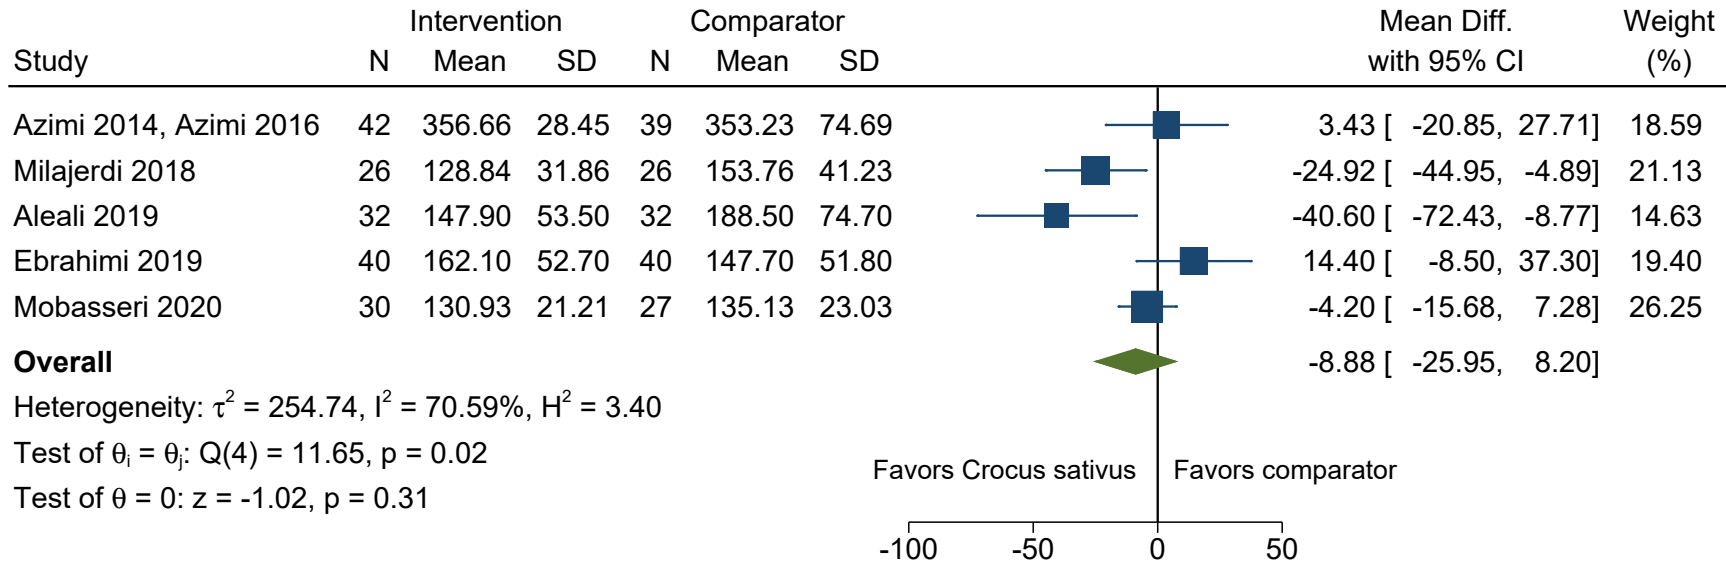

Random-effects REML model

Supplement: Data_Sheet_1.zip [file Data_Sheet_1.zip]

# Cinnamomum aromaticum - Fasting insulin

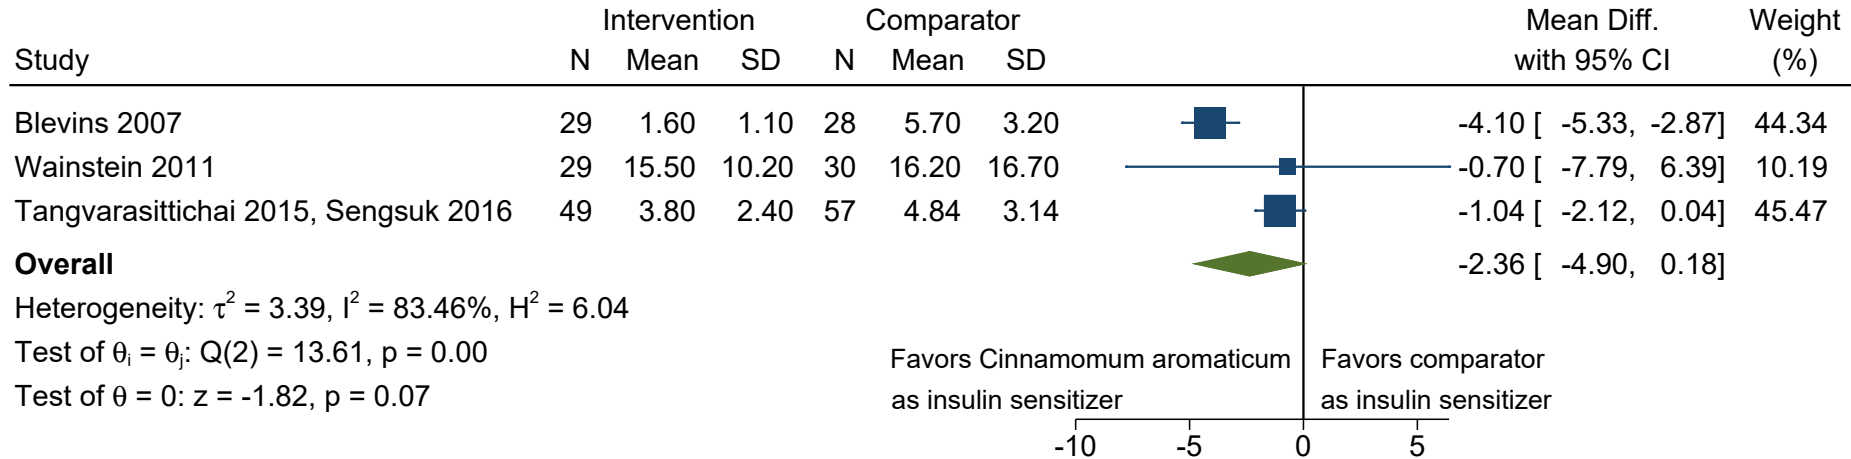

Supplement: Data_Sheet_1.zip [file Data_Sheet_1.zip]

# Cinnamomum verum - TG

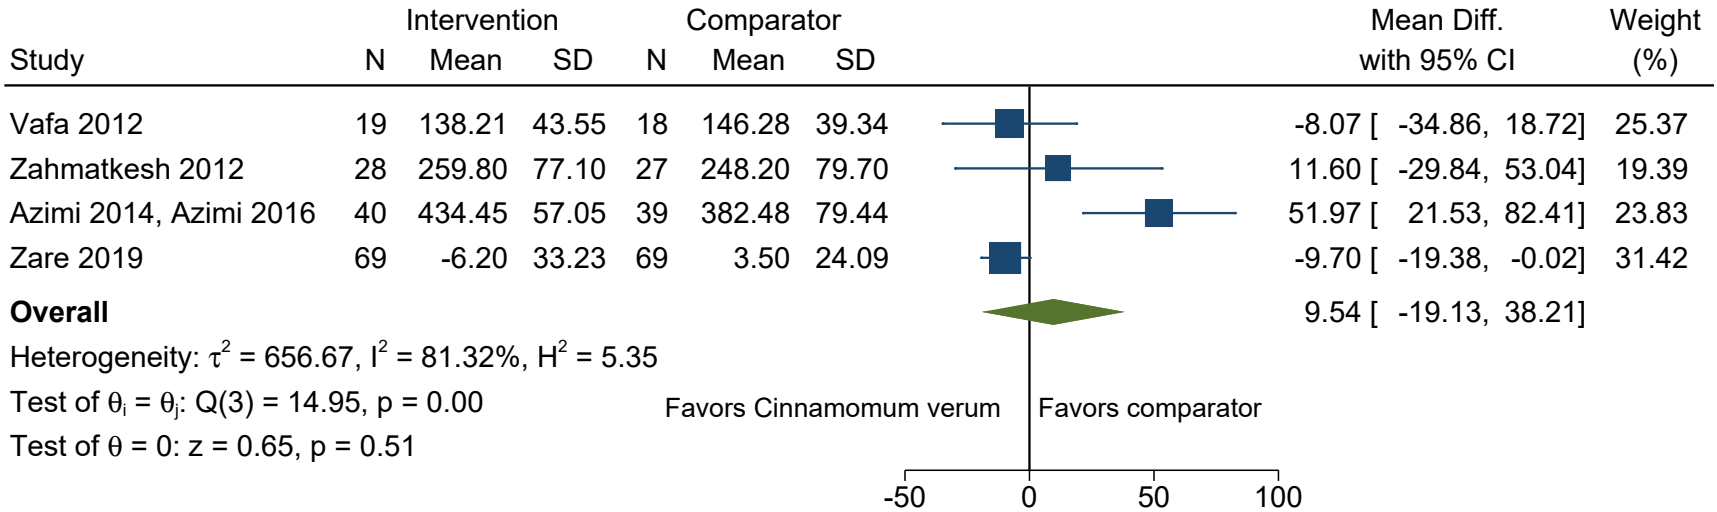

Random-effects REML model

Supplement: Data_Sheet_1.zip [file Data_Sheet_1.zip]

# Camellia sinensis - Waist circumference

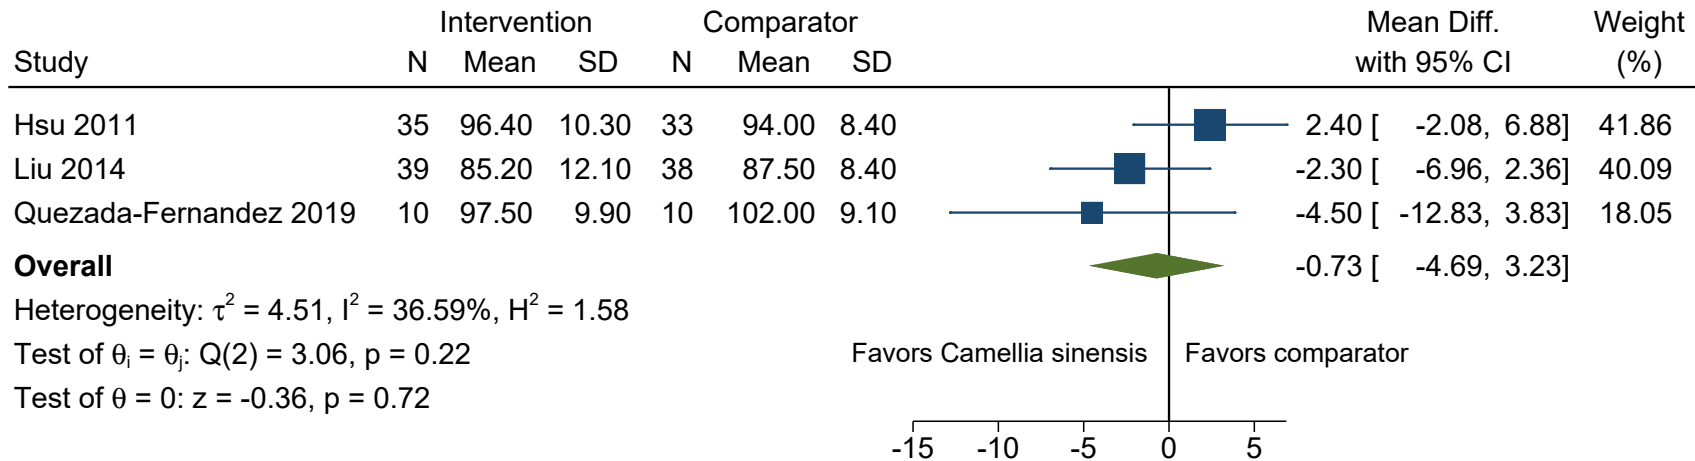

Random-effects REML model

Supplement: Data_Sheet_1.zip [file Data_Sheet_1.zip]

# Momordica charantia - SBP

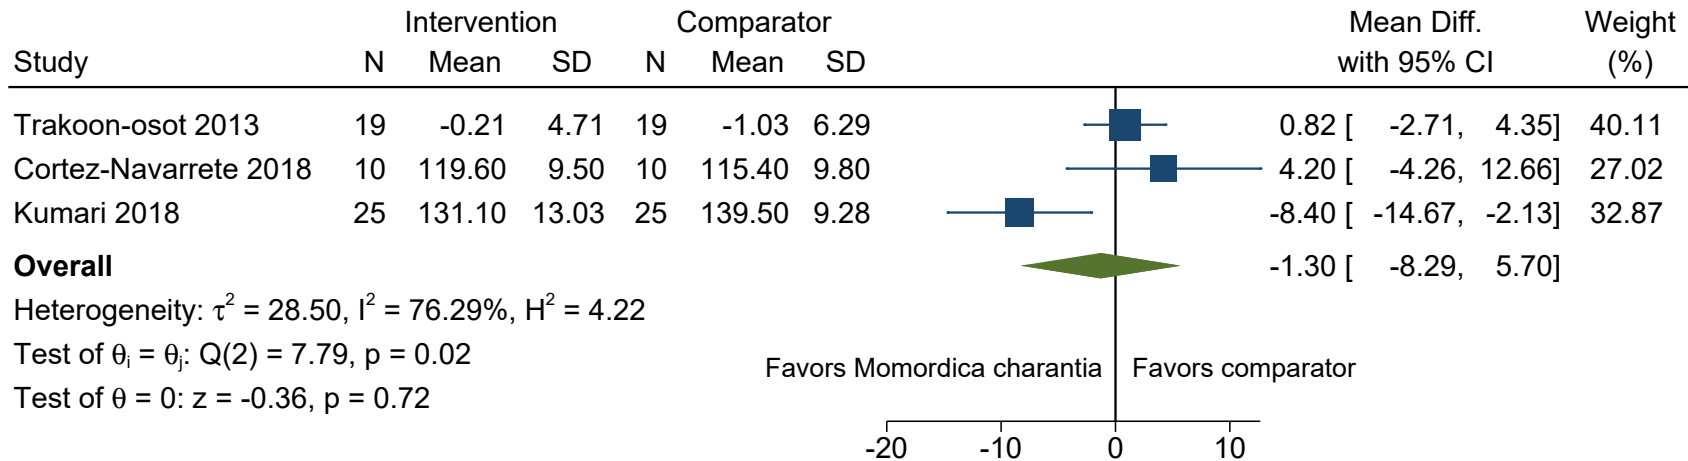

Supplement: Data_Sheet_1.zip [file Data_Sheet_1.zip]

# Coccinia grandis - LDL-C

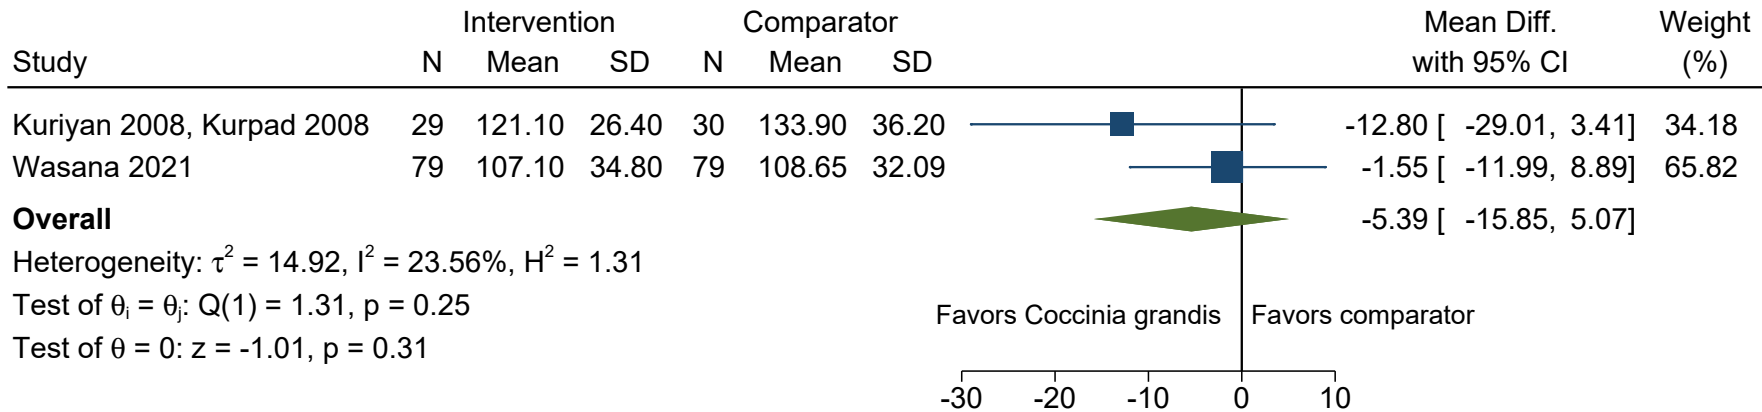

Random-effects REML model

Supplement: Data_Sheet_1.zip [file Data_Sheet_1.zip]

# Cuminum cyminum - HbA1c

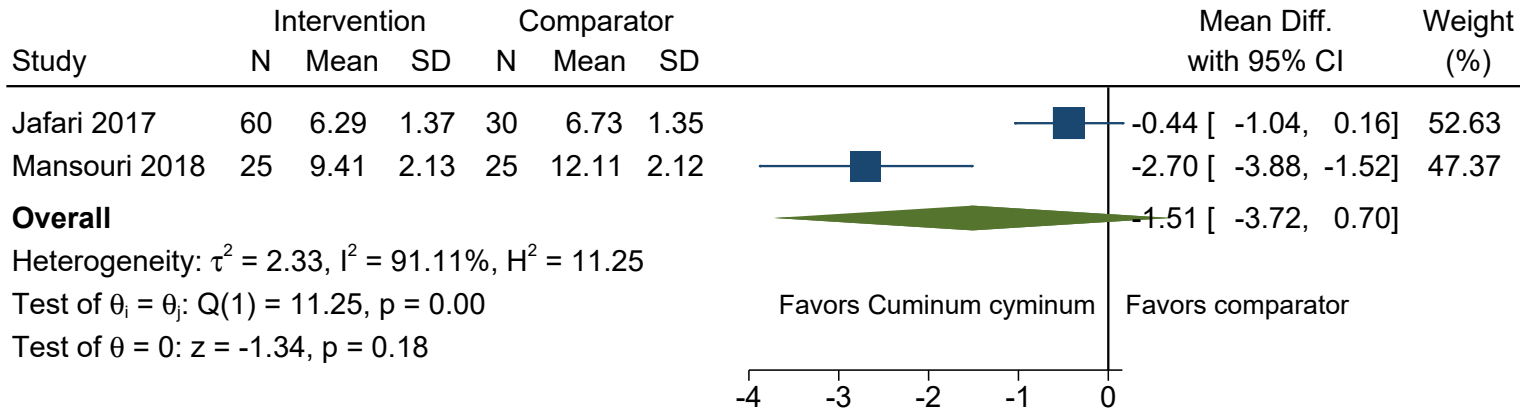

Random-effects REML model

Supplement: Data_Sheet_1.zip [file Data_Sheet_1.zip]

# Gynostemma pentaphyllum - BMI

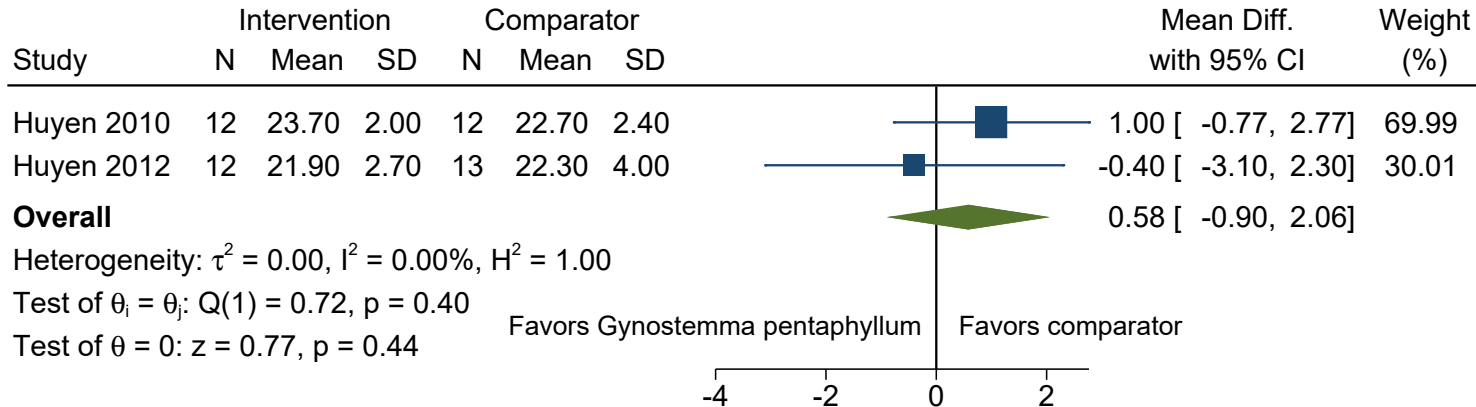

Random-effects REML model

Supplement: Data_Sheet_1.zip [file Data_Sheet_1.zip]

# Boswellia serrata - HbA1c

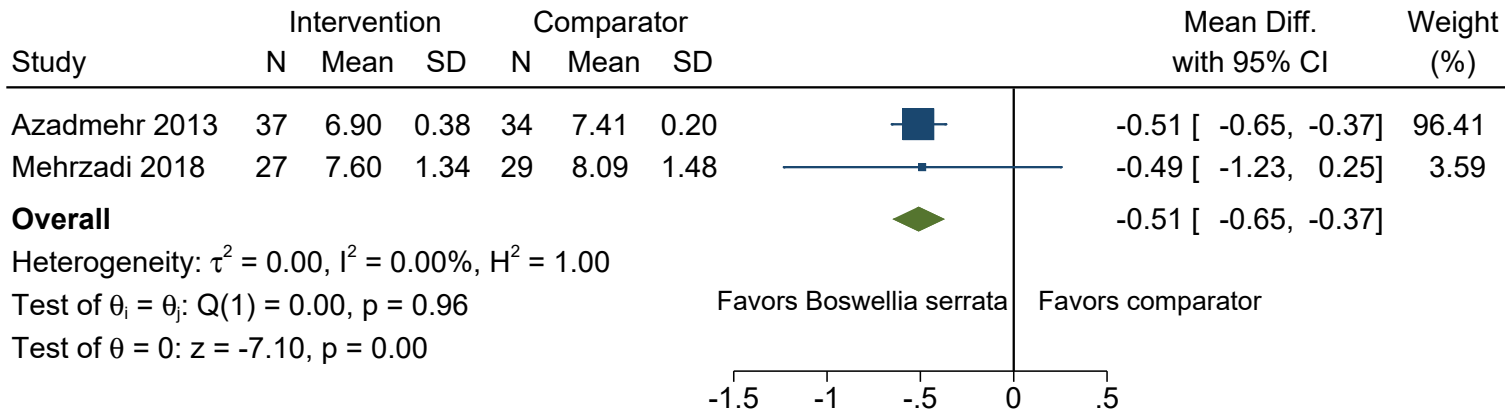

Random-effects REML model

Supplement: Data_Sheet_1.zip [file Data_Sheet_1.zip]

# Portulaca oleracea - HDL-C

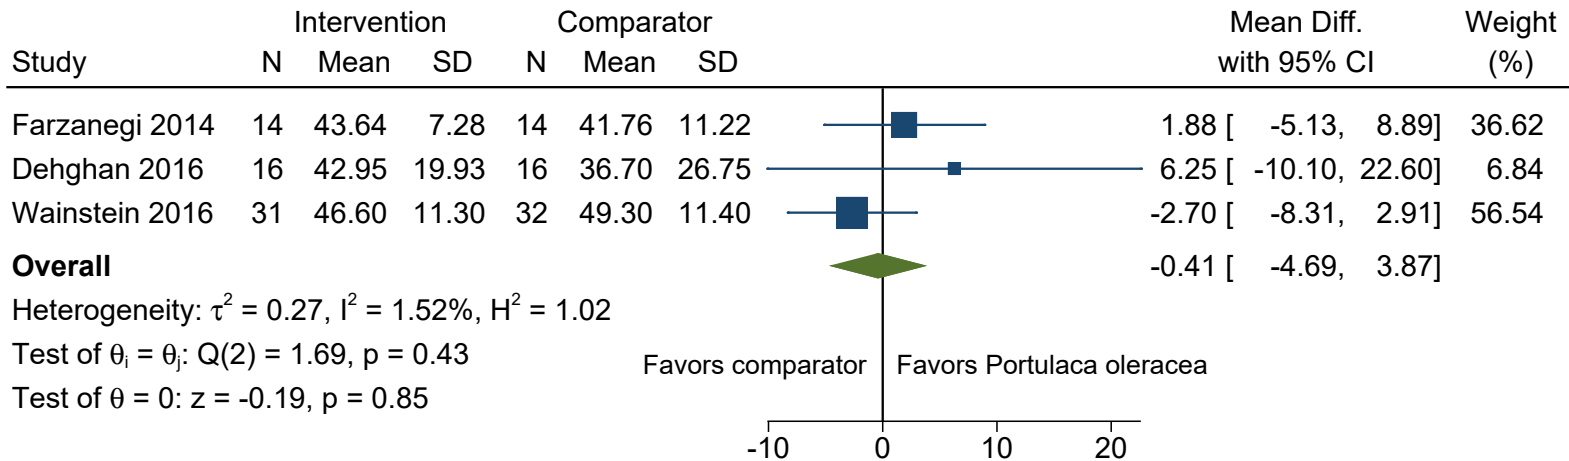

Random-effects REML model

Supplement: Data_Sheet_1.zip [file Data_Sheet_1.zip]

# Cinnamomum verum - LDL-C

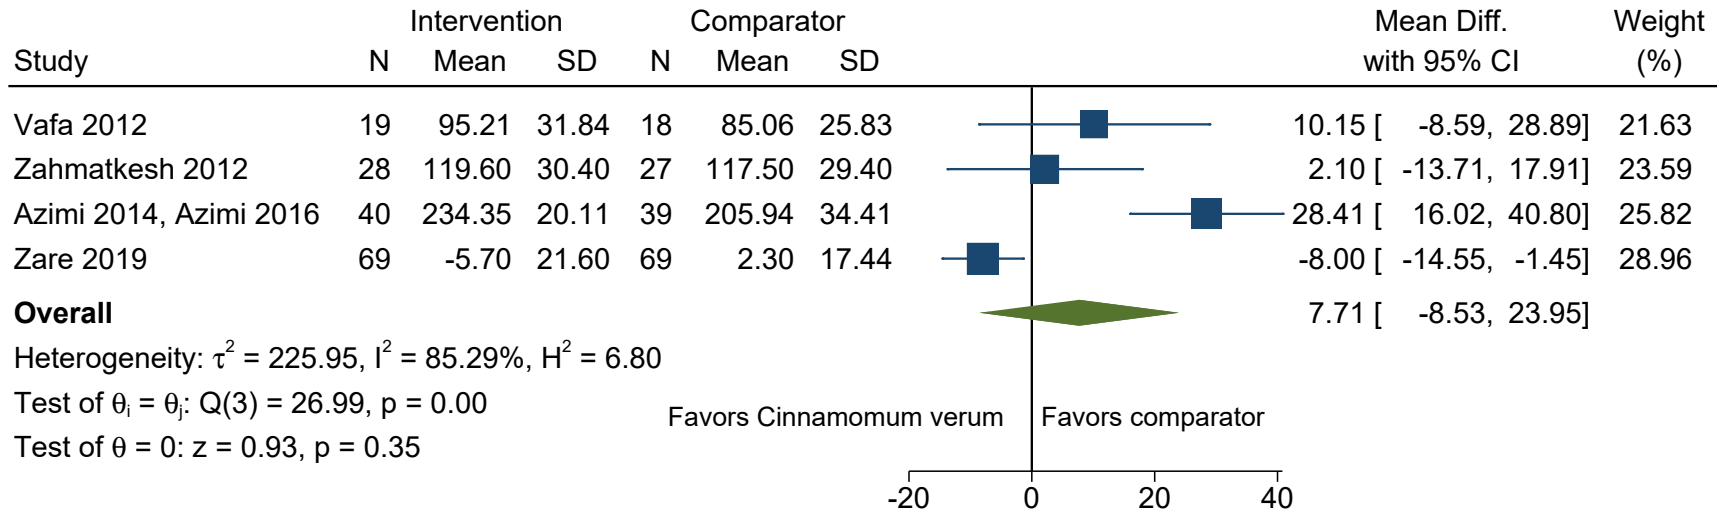

Supplement: Data_Sheet_1.zip [file Data_Sheet_1.zip]

# Curcuma longa - FBG

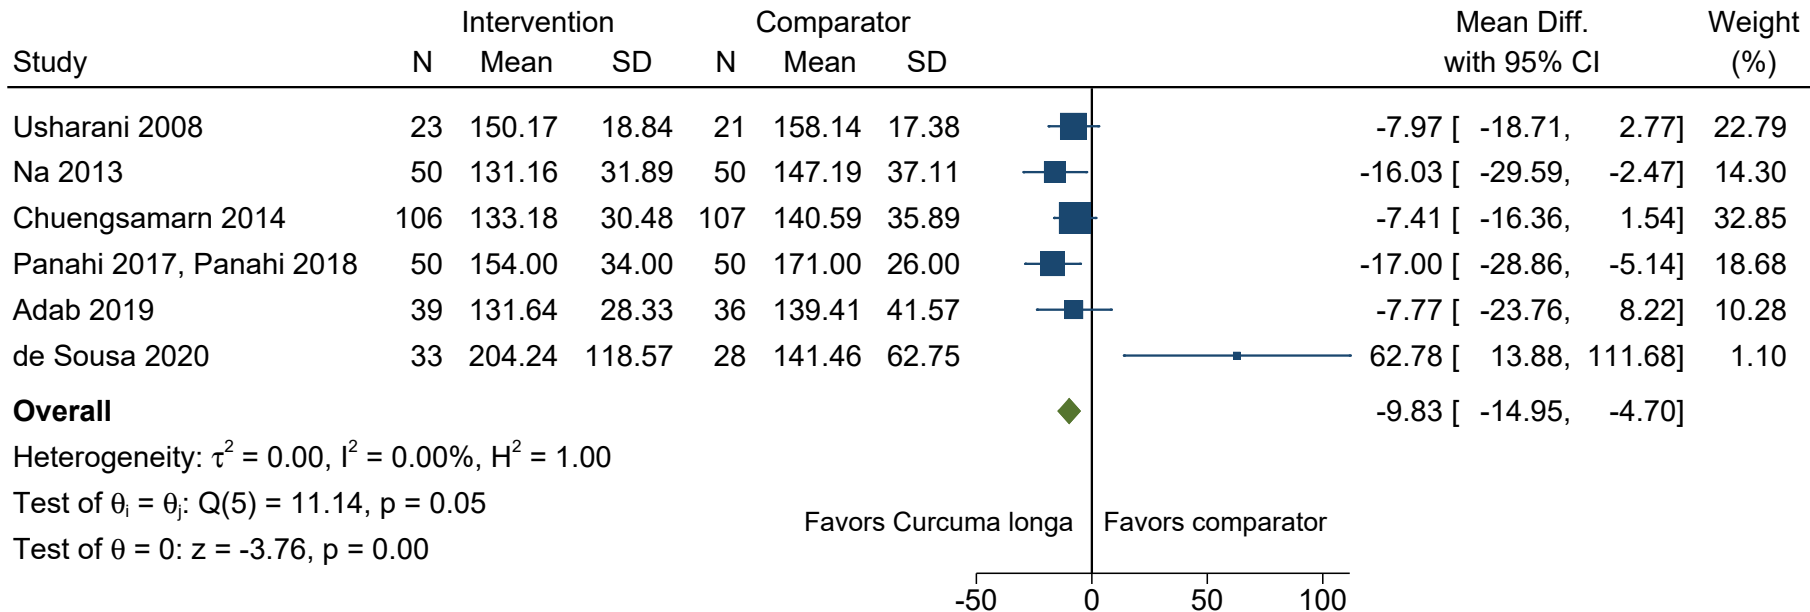

Supplement: Data_Sheet_1.zip [file Data_Sheet_1.zip]

# Cinnamomum aromaticum - TC

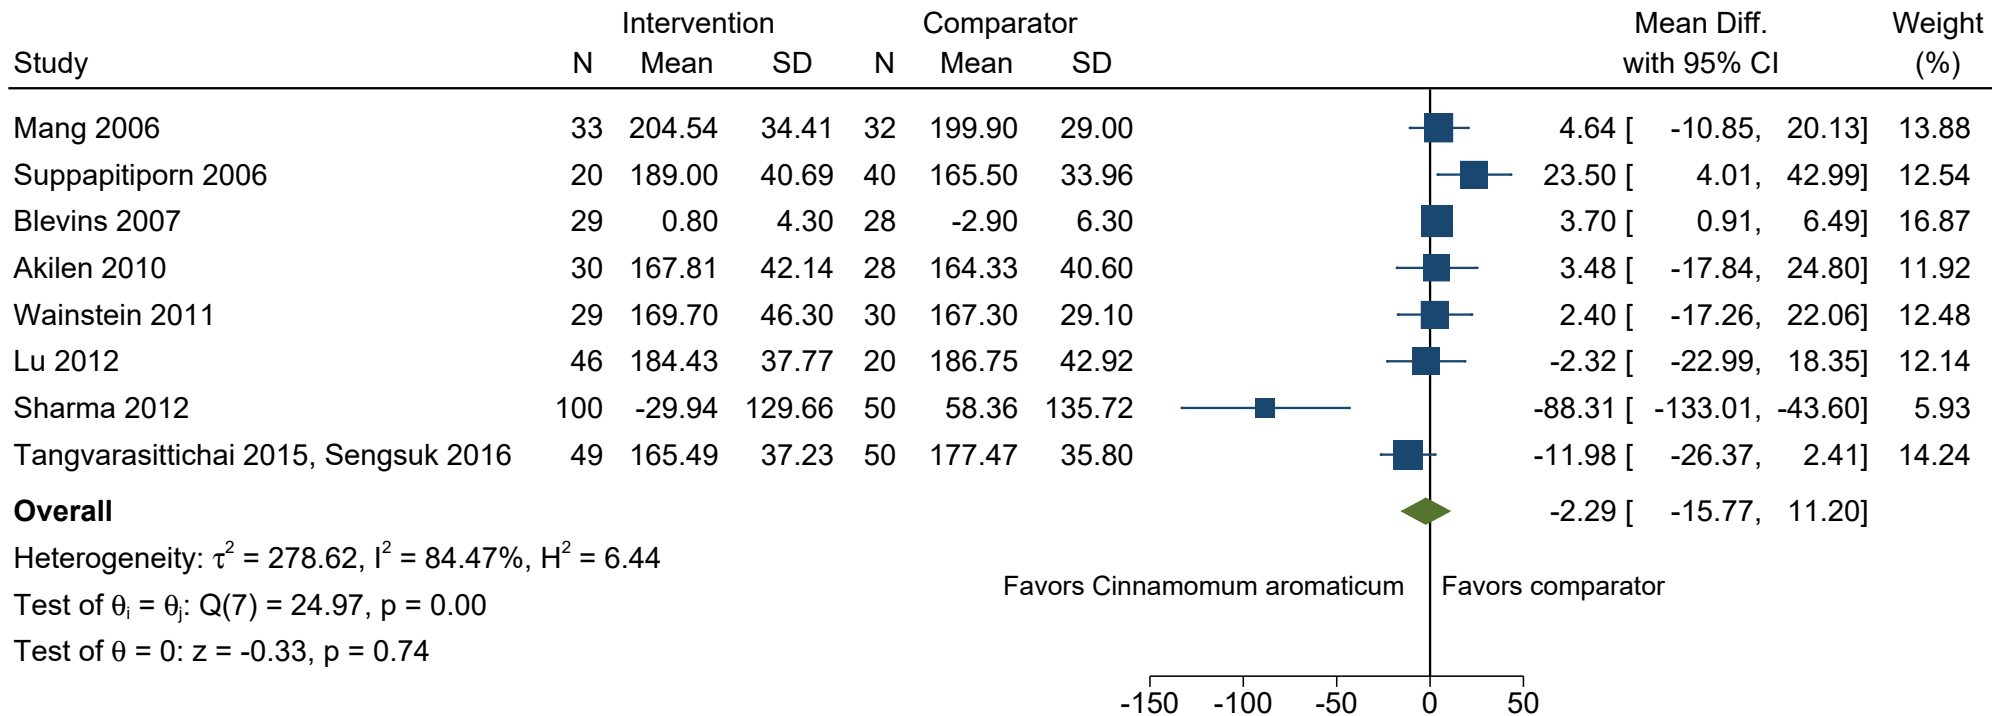

Supplement: Data_Sheet_1.zip [file Data_Sheet_1.zip]

# Anethum graveolens - TC

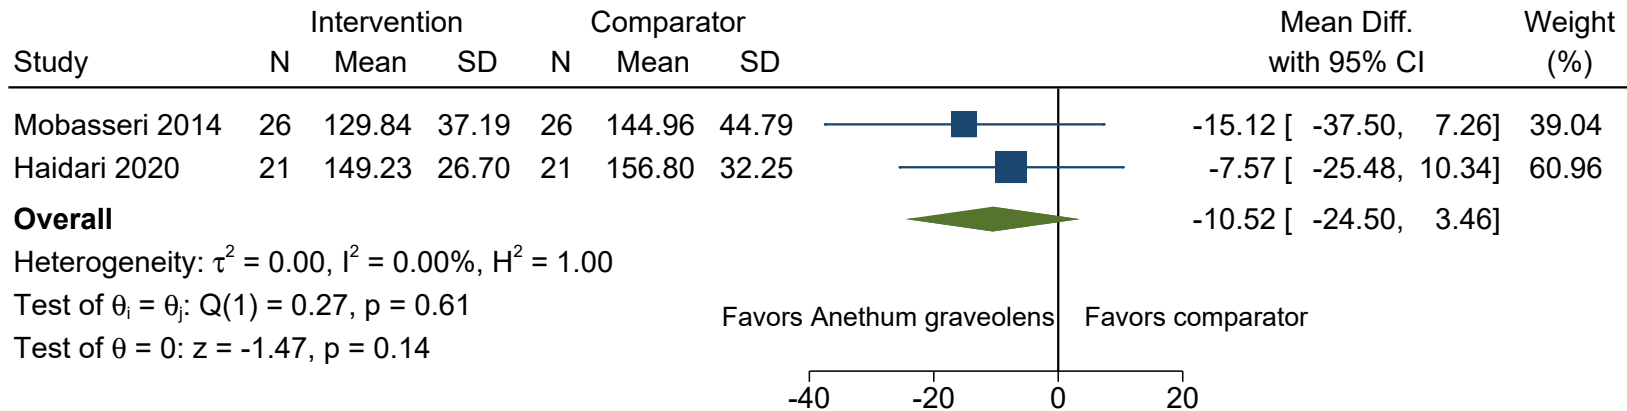

Random-effects REML model

Supplement: Data_Sheet_1.zip [file Data_Sheet_1.zip]

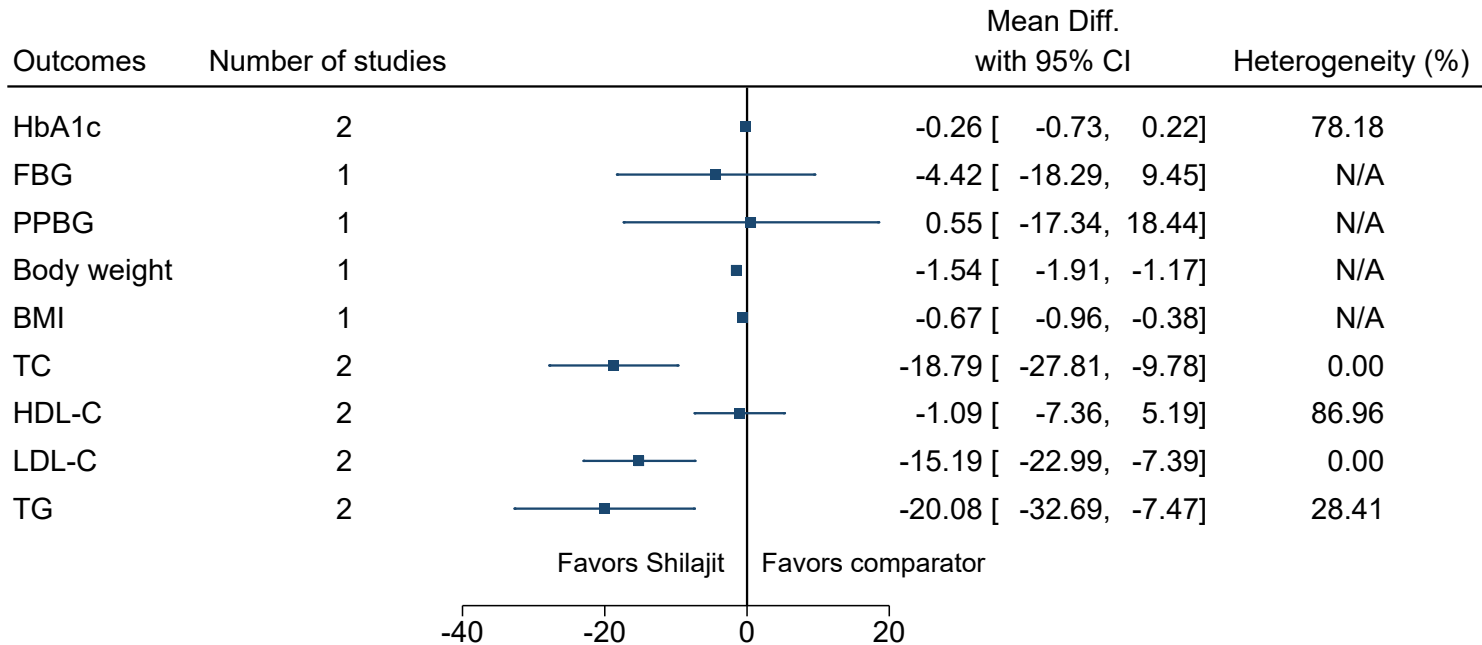

Supplement: Data_Sheet_1.zip [file Data_Sheet_1.zip]

# Aegle marmelos - PPBG

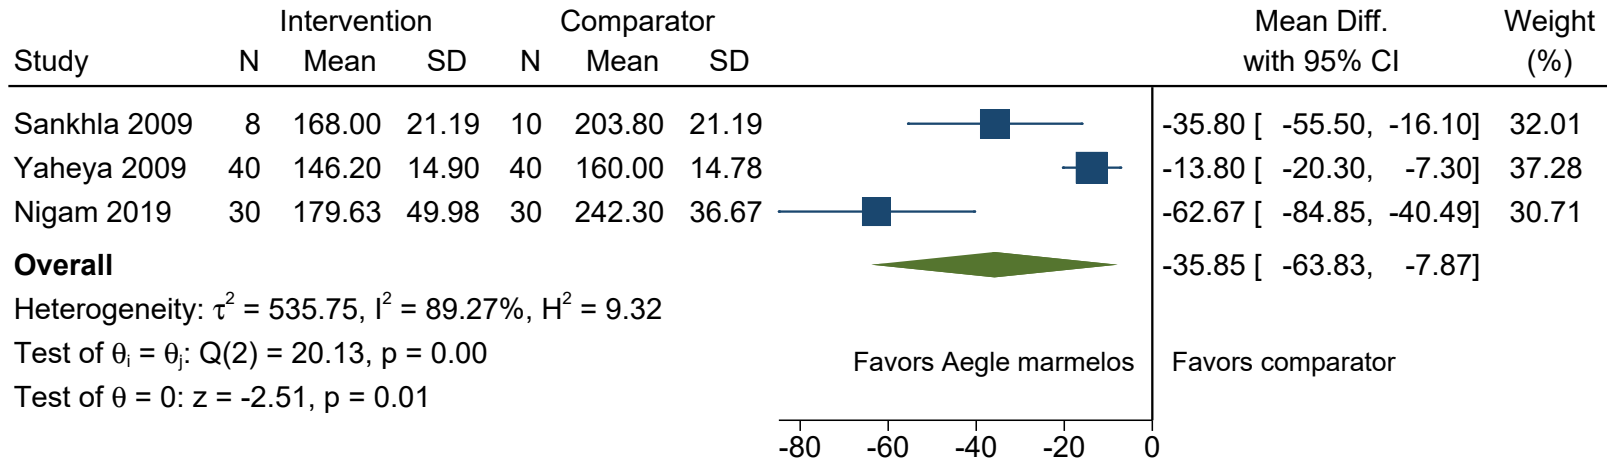

Random-effects REML model

Supplement: Data_Sheet_1.zip [file Data_Sheet_1.zip]

# Azadirachta indica - TG

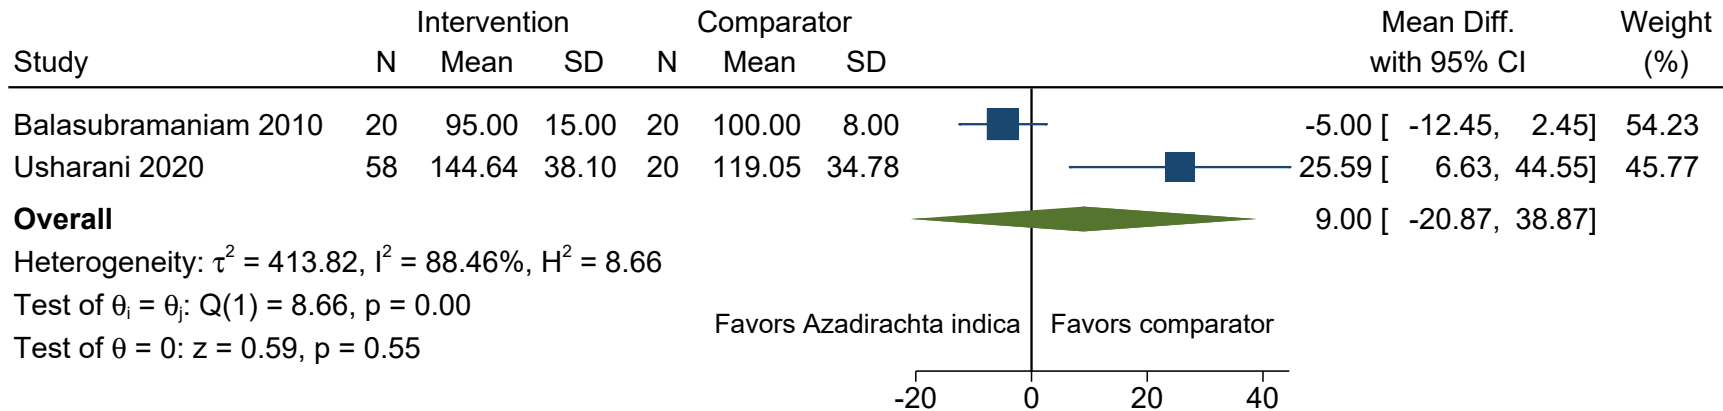

Random-effects REML model

Supplement: Data_Sheet_1.zip [file Data_Sheet_1.zip]

# Camellia sinensis - Fasting insulin

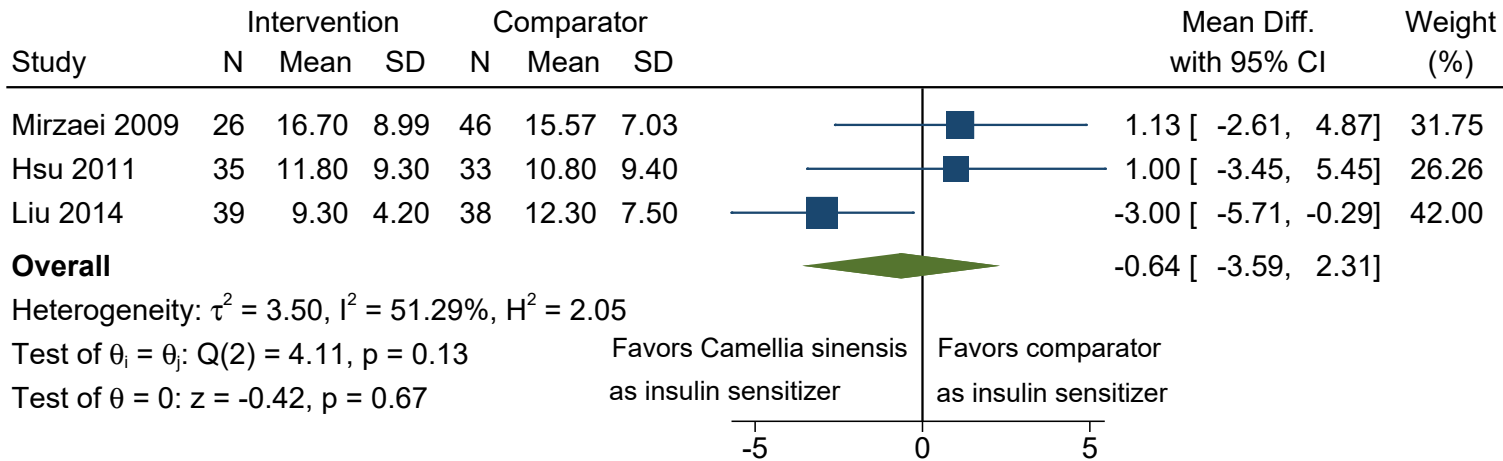

Supplement: Data_Sheet_1.zip [file Data_Sheet_1.zip]

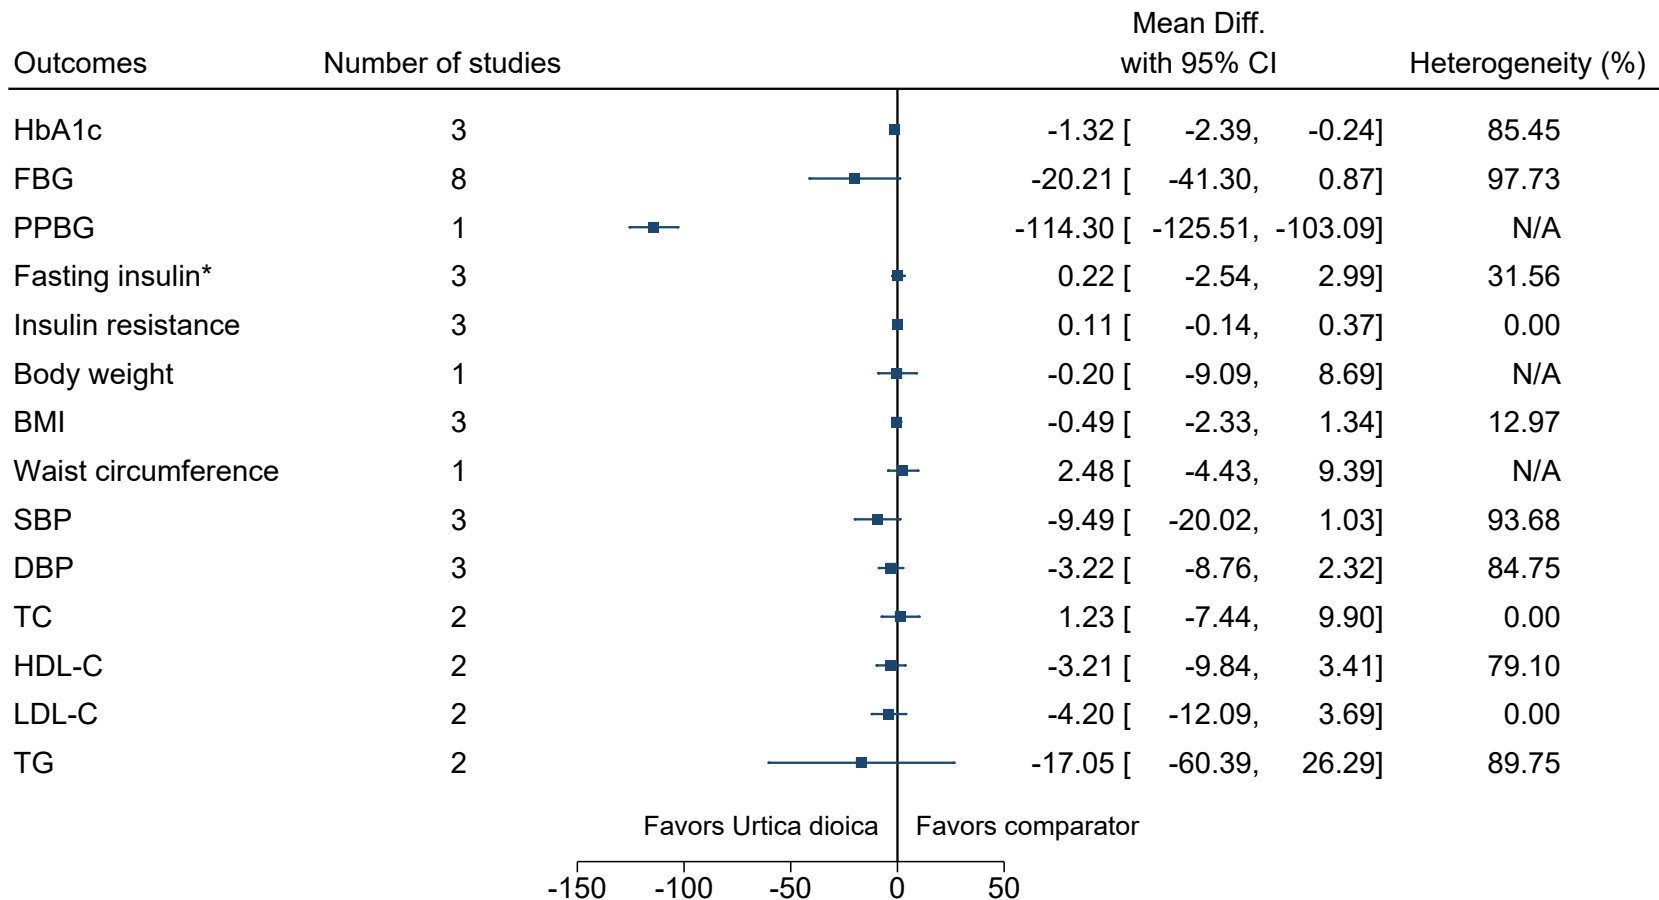

\*Favors intervention/comparator as insulin sensitizer

Supplement: Data_Sheet_1.zip [file Data_Sheet_1.zip]

# Coccinia grandis - HbA1c

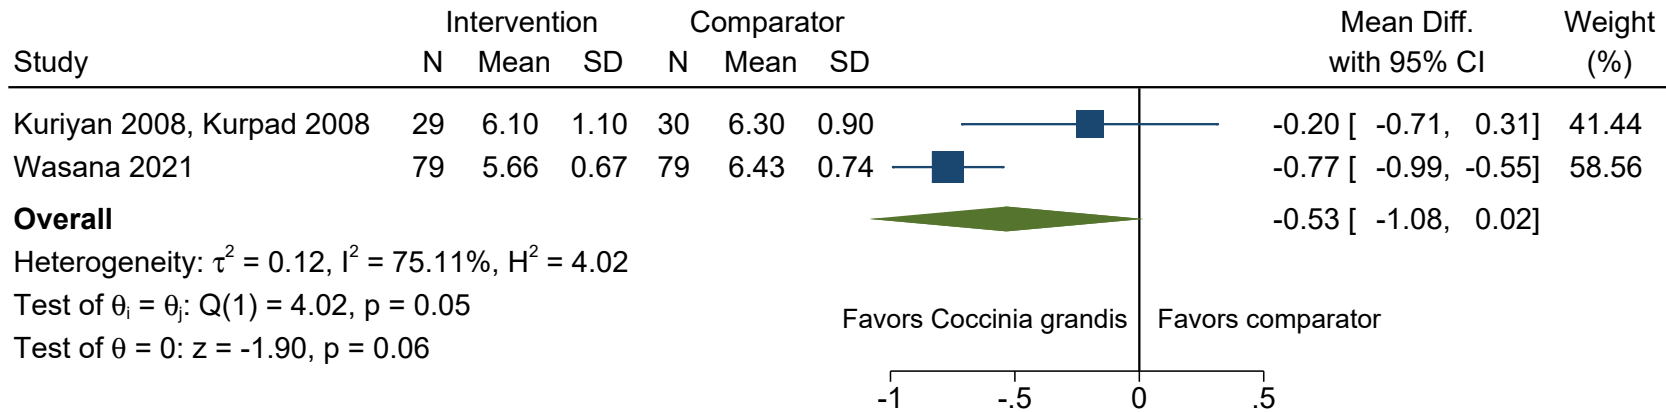

Random-effects REML model

Supplement: Data_Sheet_1.zip [file Data_Sheet_1.zip]

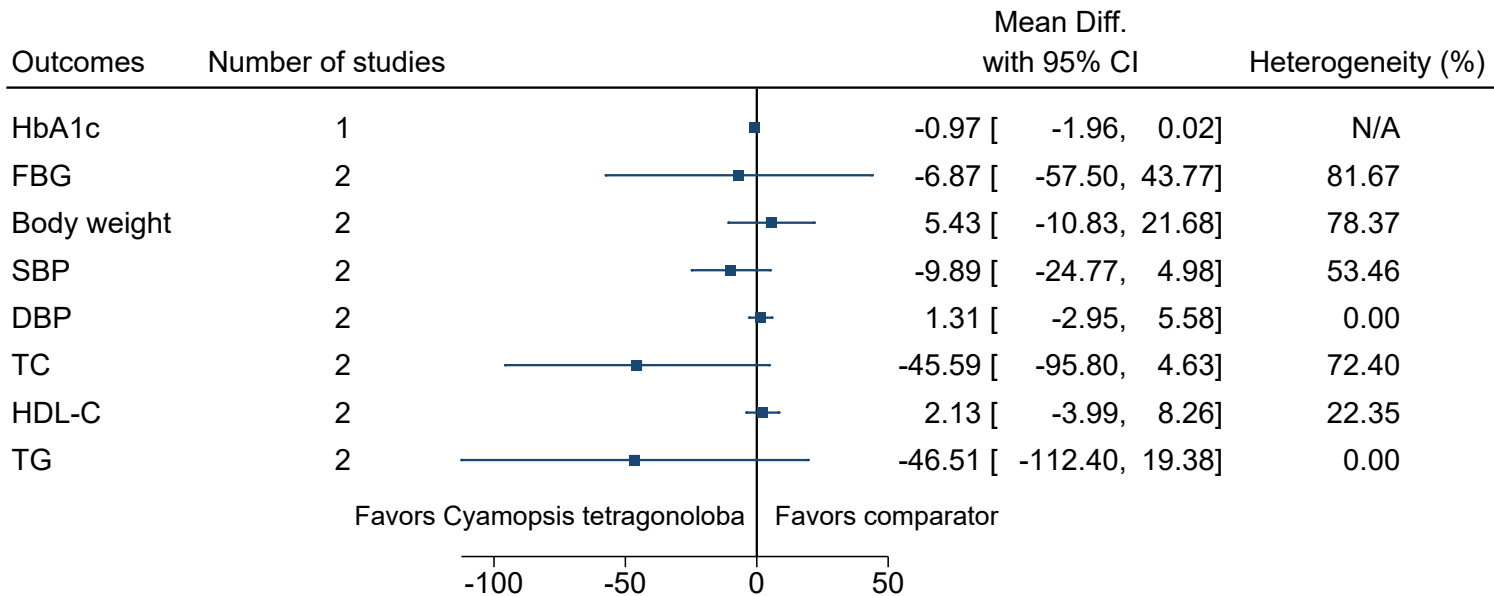

Supplement: Data_Sheet_1.zip [file Data_Sheet_1.zip]

# Momordica charantia - Body weight

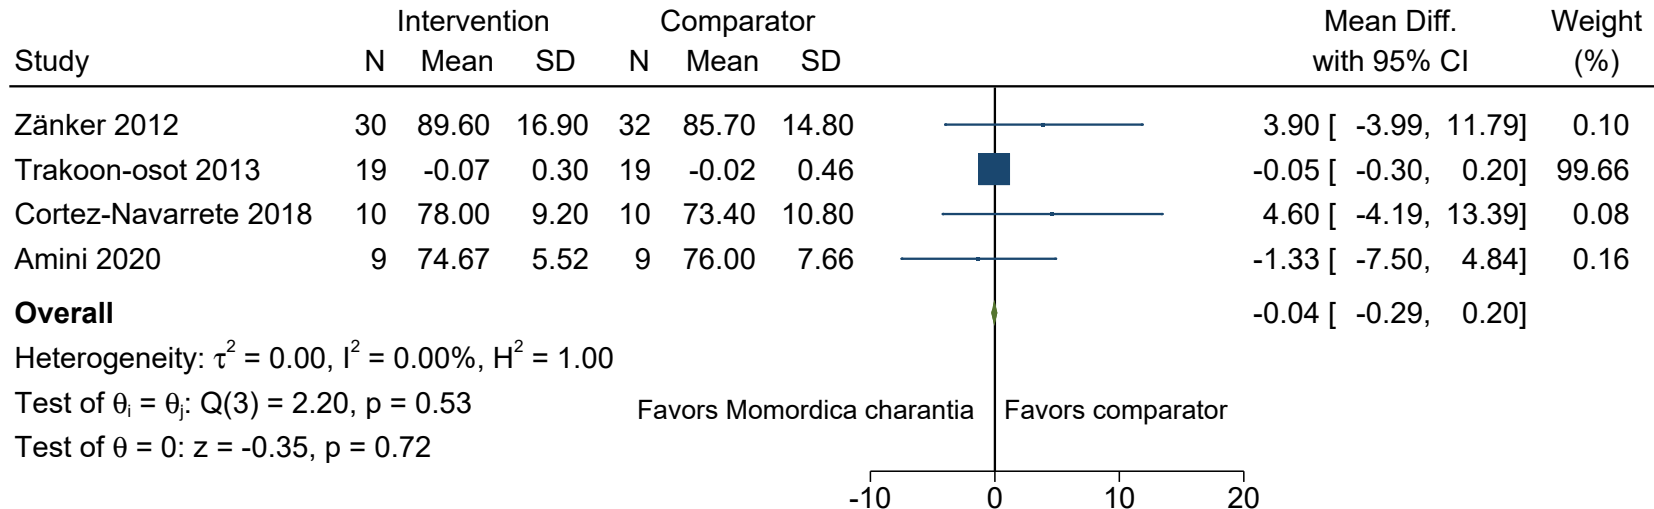

Random-effects REML model

Supplement: Data_Sheet_1.zip [file Data_Sheet_1.zip]

# Plantago ovata - HbA1c

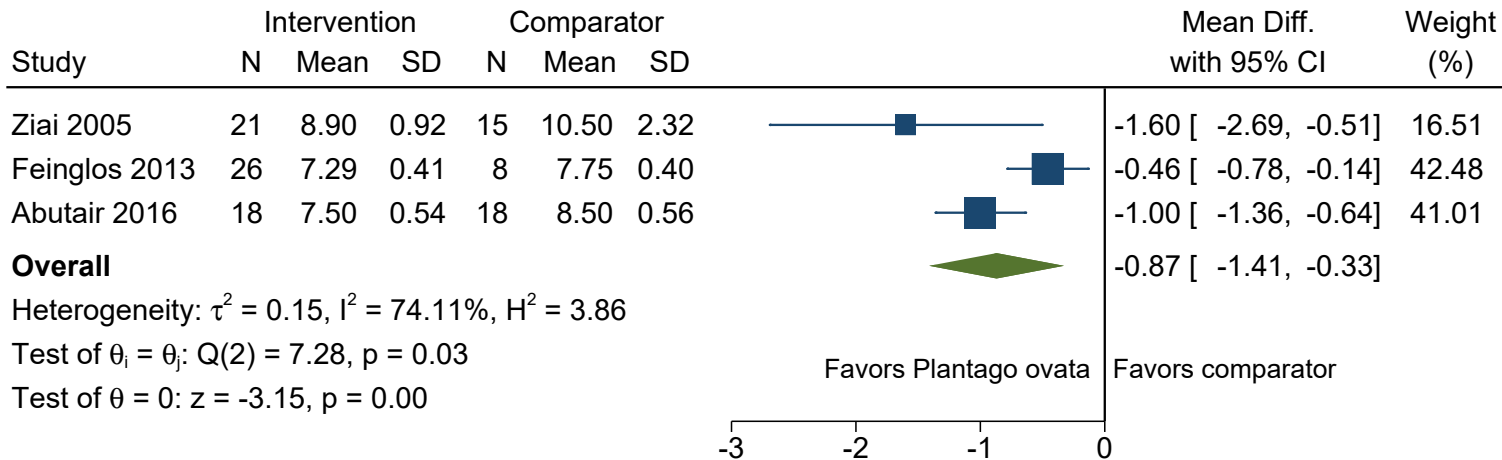

Supplement: Data_Sheet_1.zip [file Data_Sheet_1.zip]

# Nigella sativa - TG

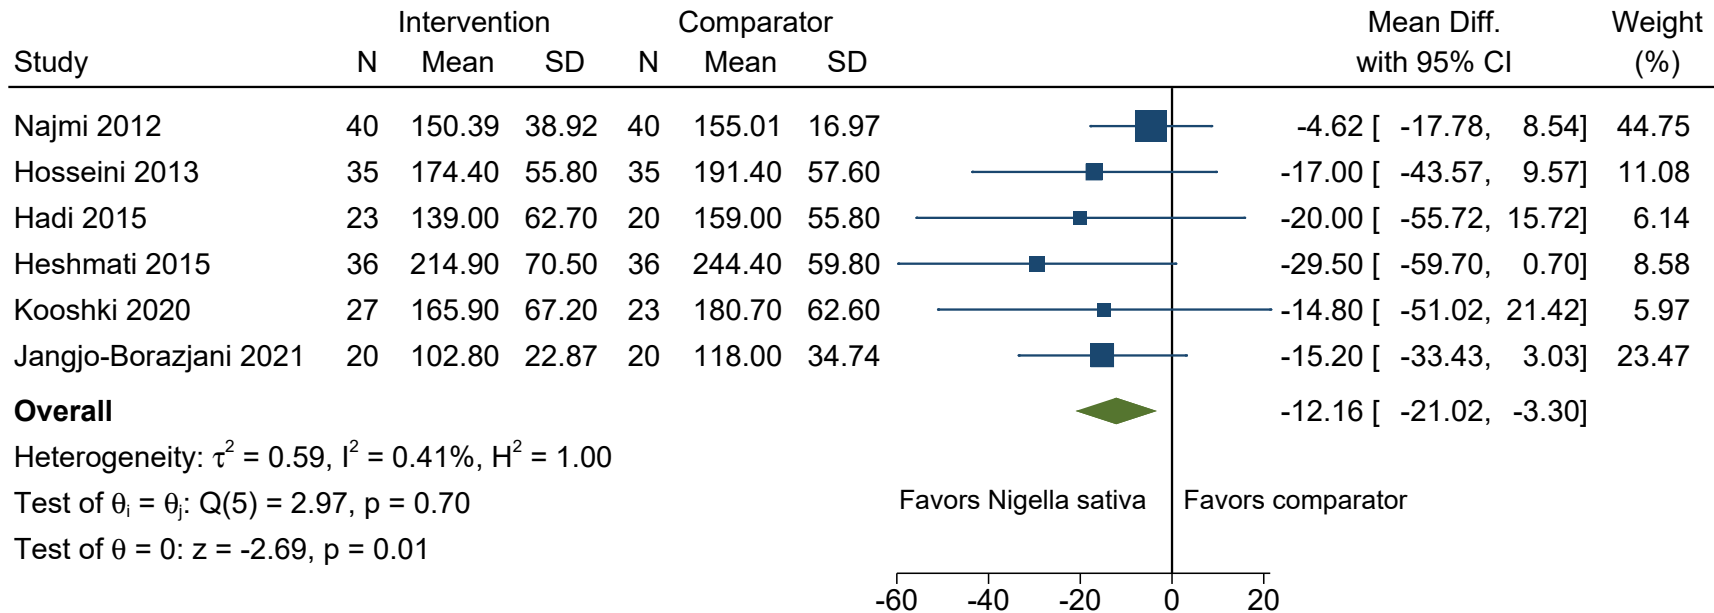

Supplement: Data_Sheet_1.zip [file Data_Sheet_1.zip]

# Crocus sativus - LDL-C

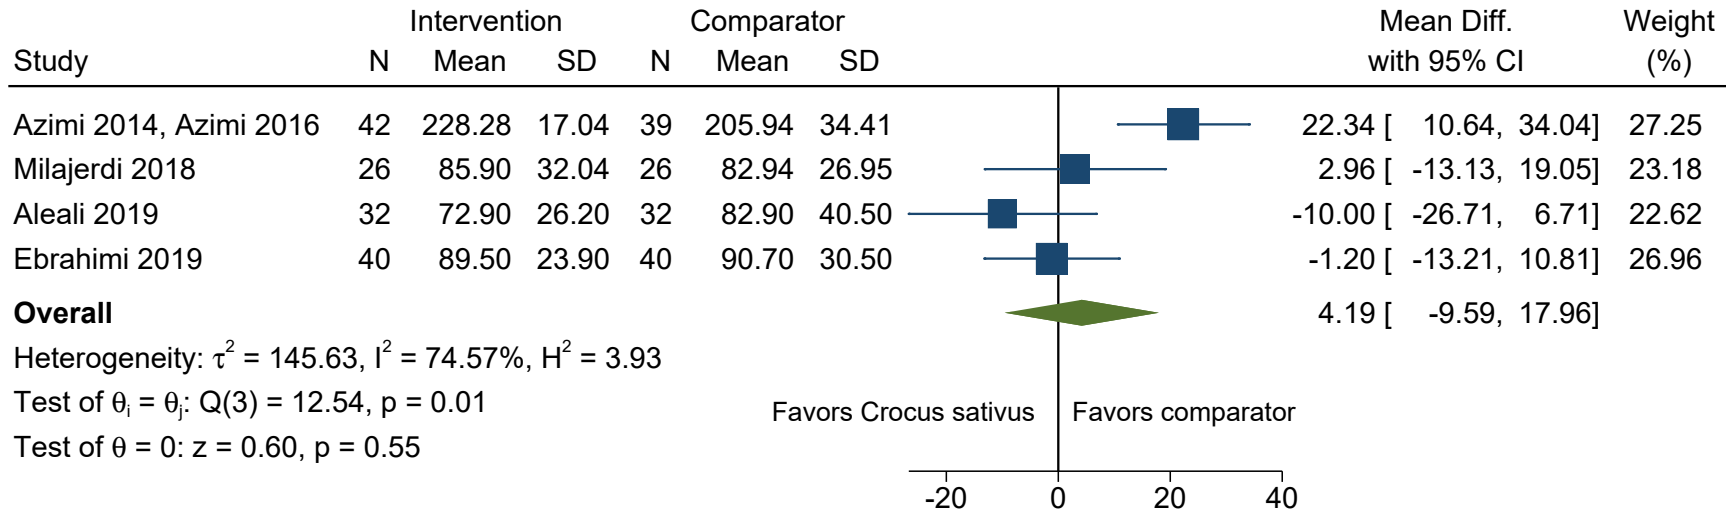

Random-effects REML model

Supplement: Data_Sheet_1.zip [file Data_Sheet_1.zip]

# Trigonella foenum-graecum - HDL-C

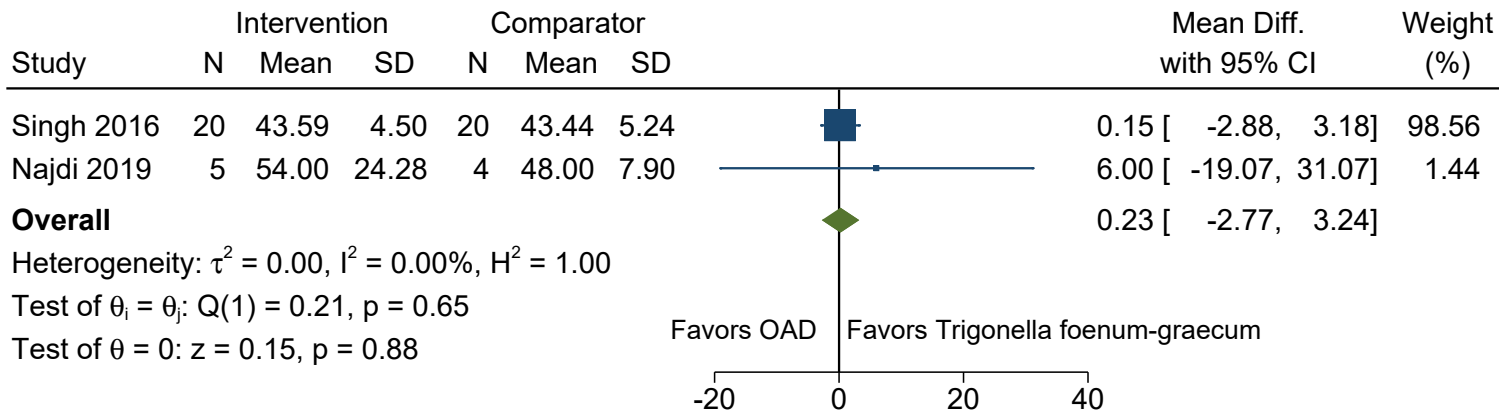

Random-effects REML model

Supplement: Data_Sheet_1.zip [file Data_Sheet_1.zip]

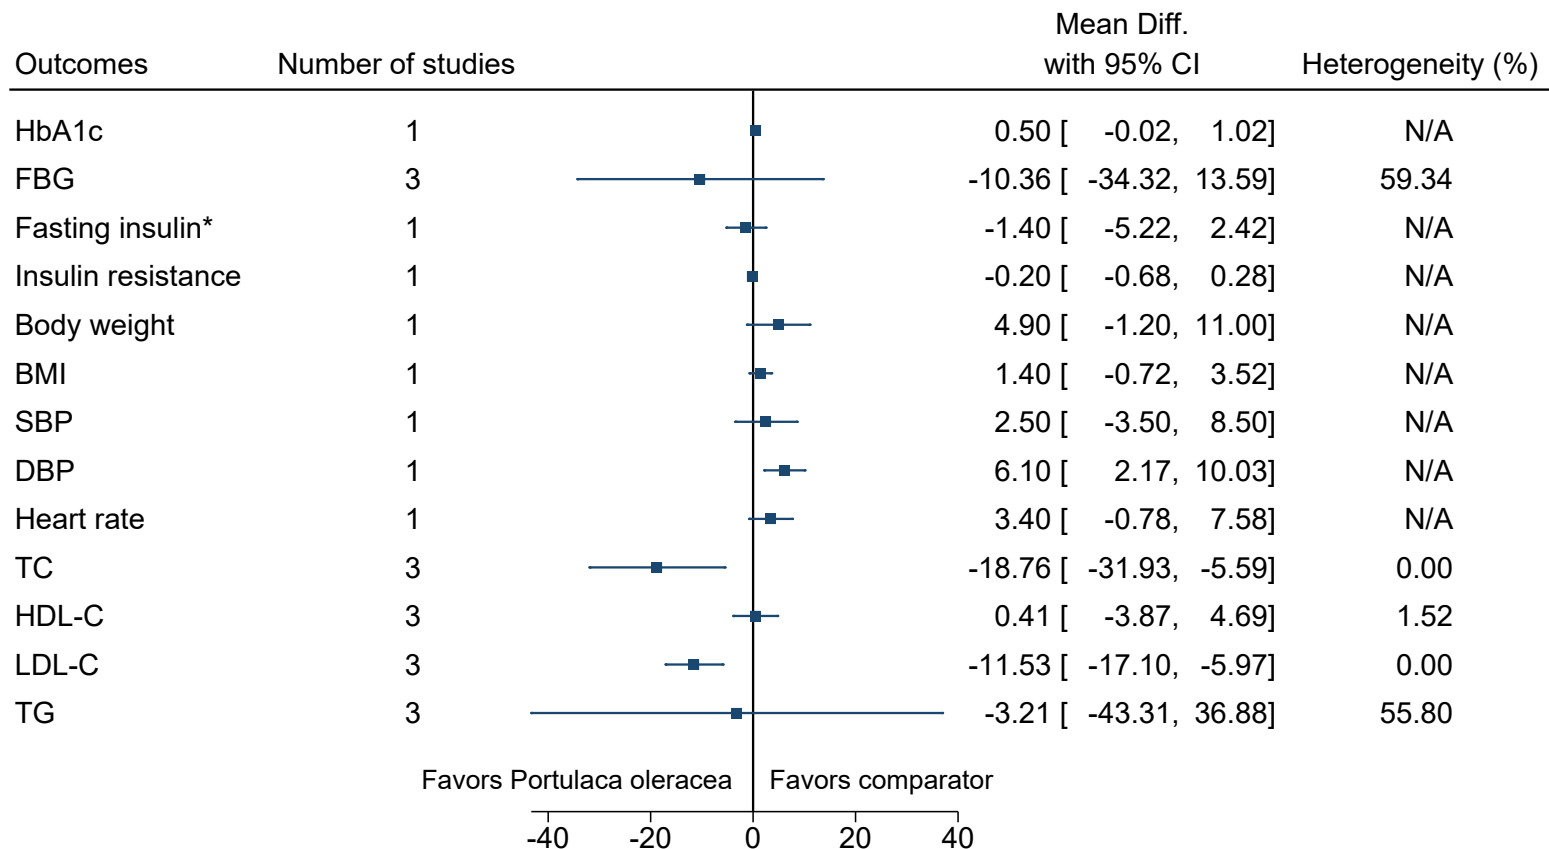

\*Favors intervention/comparator as insulin sensitizer

Supplement: Data_Sheet_1.zip [file Data_Sheet_1.zip]

# Juglans regia - PPBG

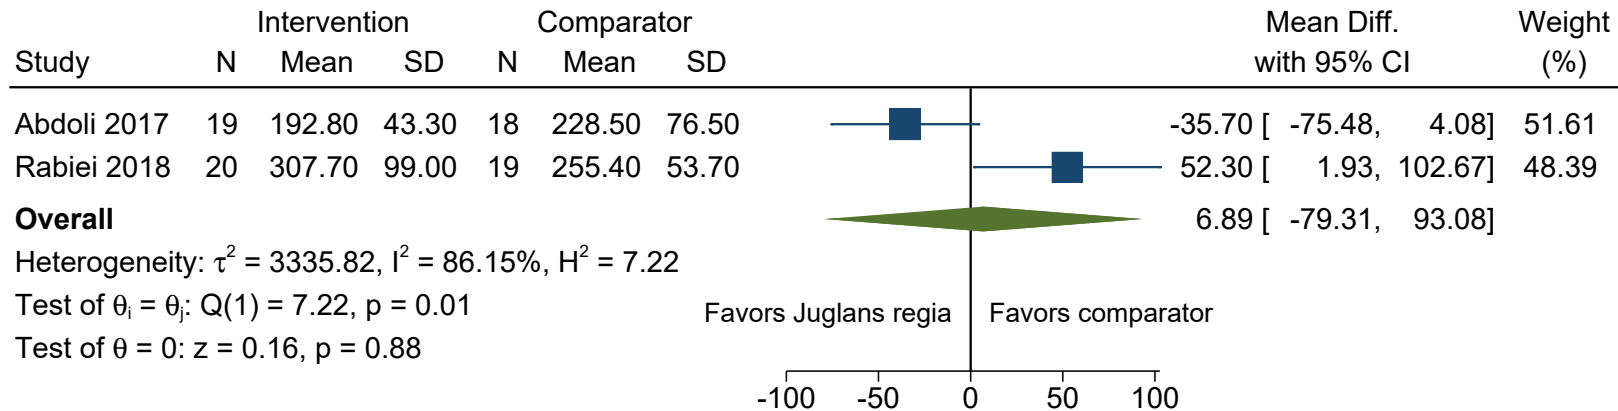

Random-effects REML model

Supplement: Data_Sheet_1.zip [file Data_Sheet_1.zip]

# Urtica dioica - HbA1c

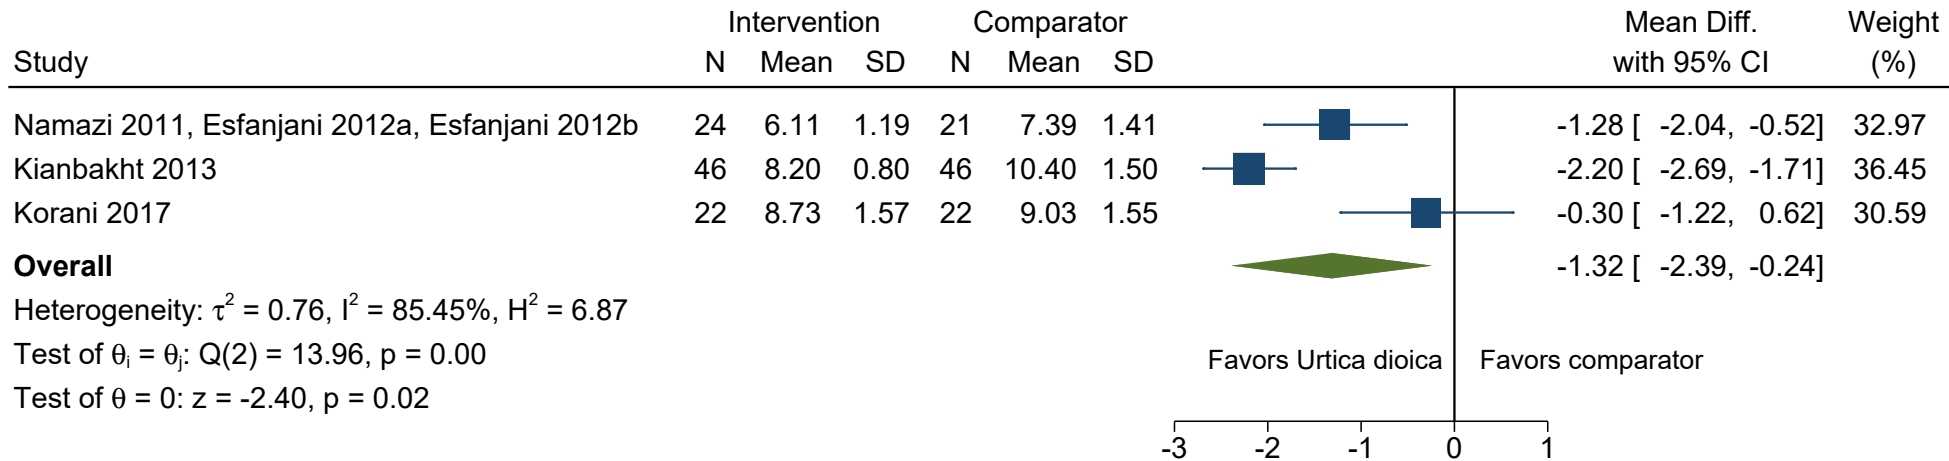

Random-effects REML model

Supplement: Data_Sheet_1.zip [file Data_Sheet_1.zip]

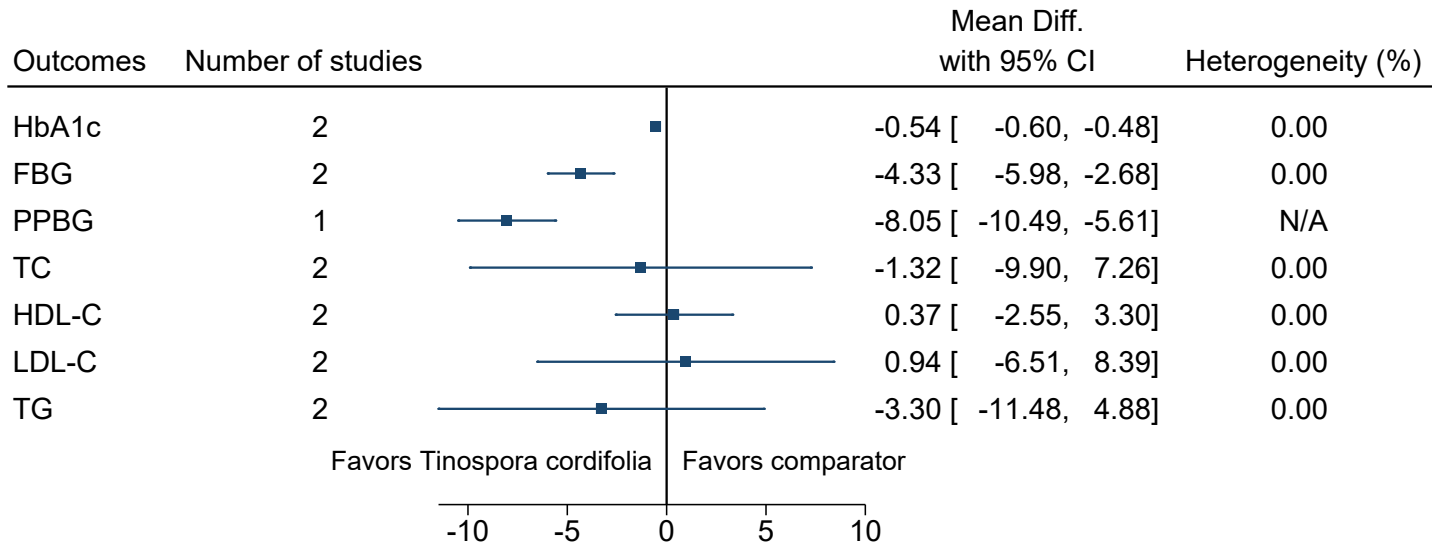

Supplement: Data_Sheet_1.zip [file Data_Sheet_1.zip]

# Crocus sativus - DBP

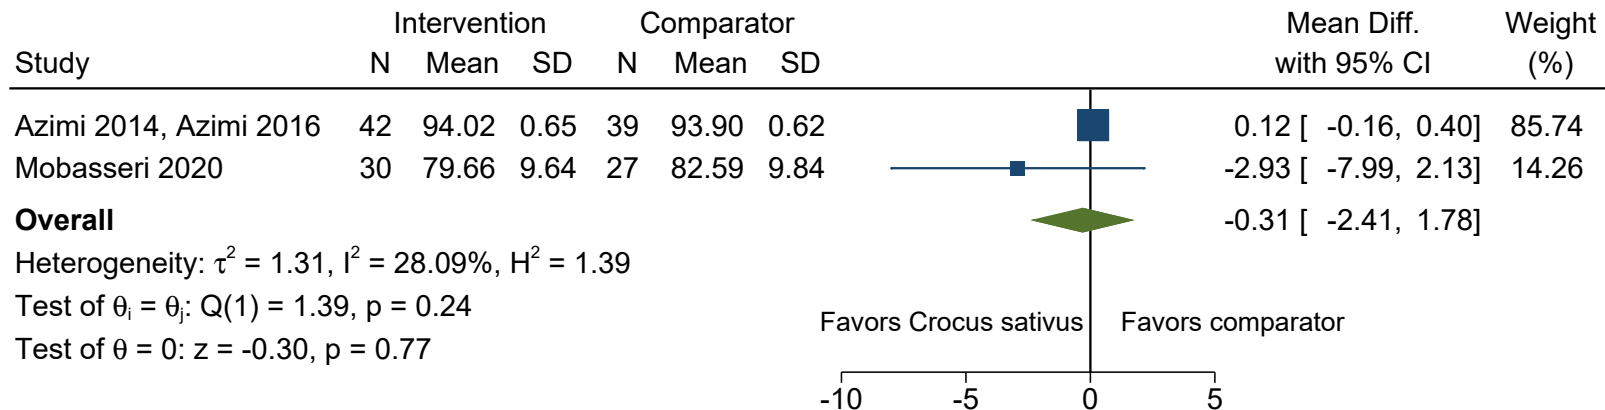

Random-effects REML model

Supplement: Data_Sheet_1.zip [file Data_Sheet_1.zip]

# Gynostemma pentaphyllum - Stimulated insulin

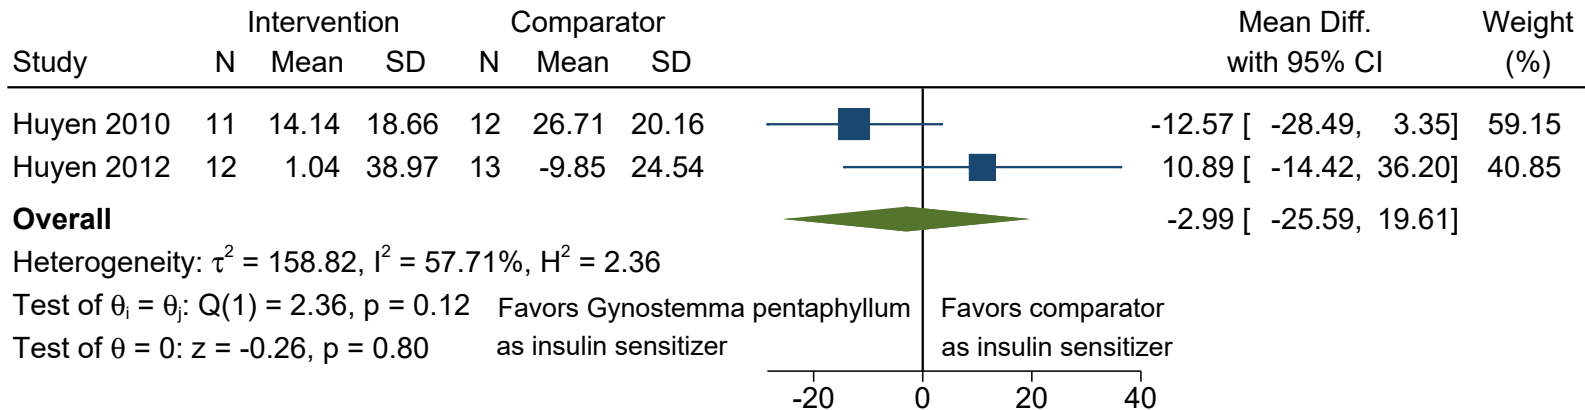

Random-effects REML model

Supplement: Data_Sheet_1.zip [file Data_Sheet_1.zip]

# Crocus sativus - HDL-C

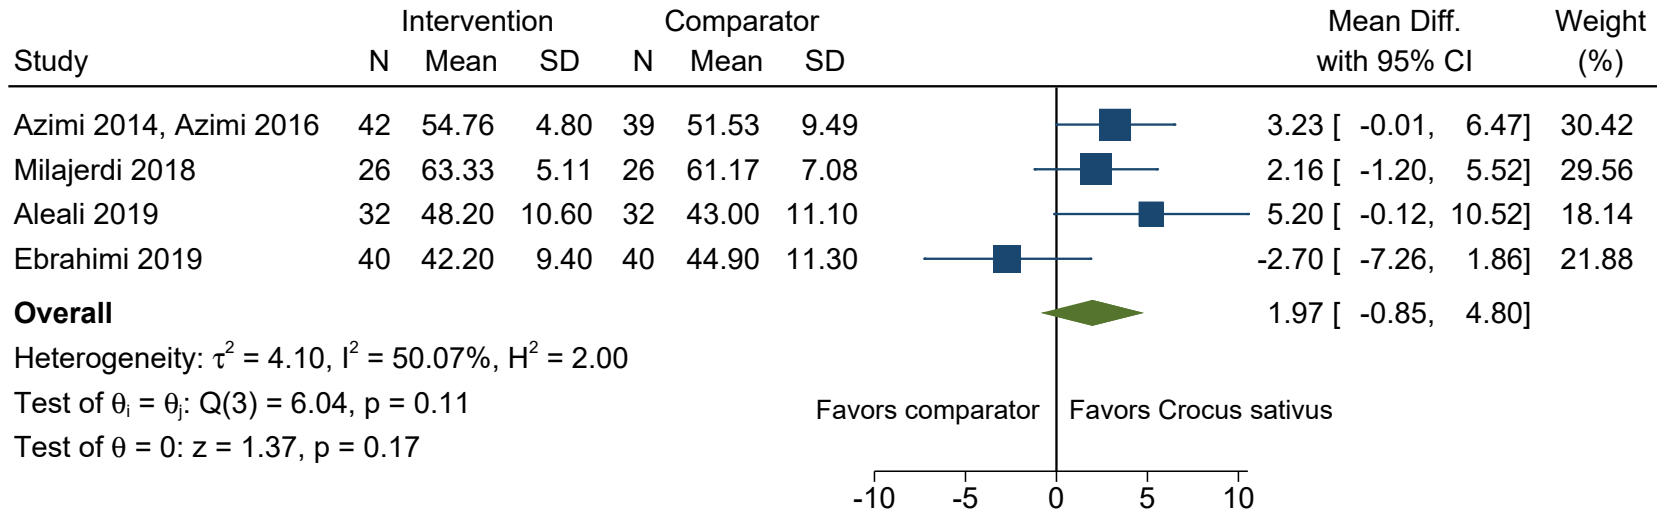

Random-effects REML model

Supplement: Data_Sheet_1.zip [file Data_Sheet_1.zip]

# Trigonella foenum-graecum - TG

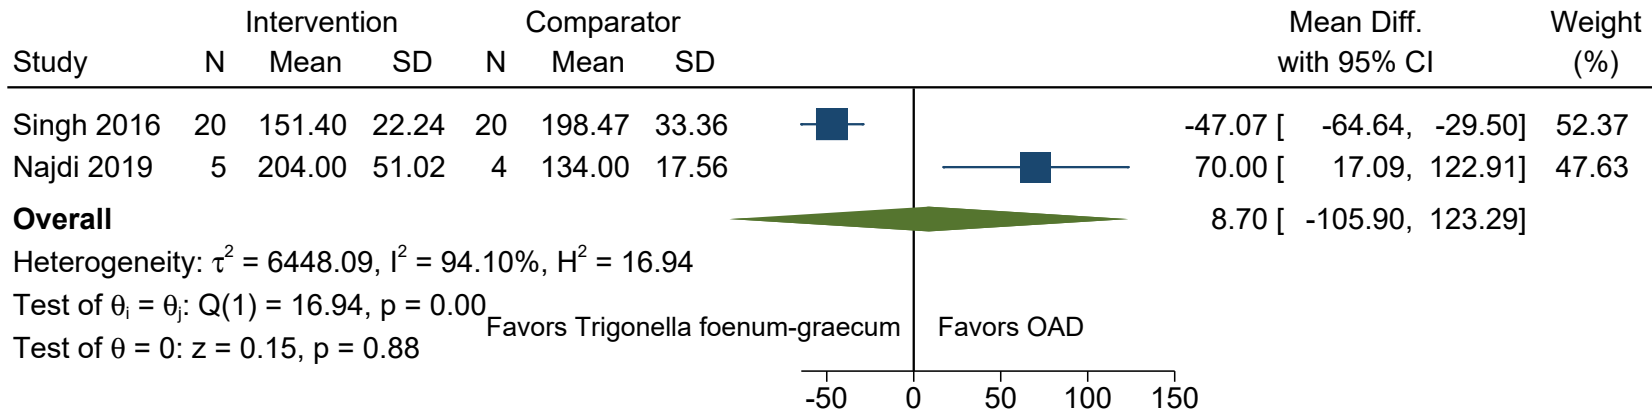

Random-effects REML model

Supplement: Data_Sheet_1.zip [file Data_Sheet_1.zip]

# Cinnamomum aromaticum - Waist circumference

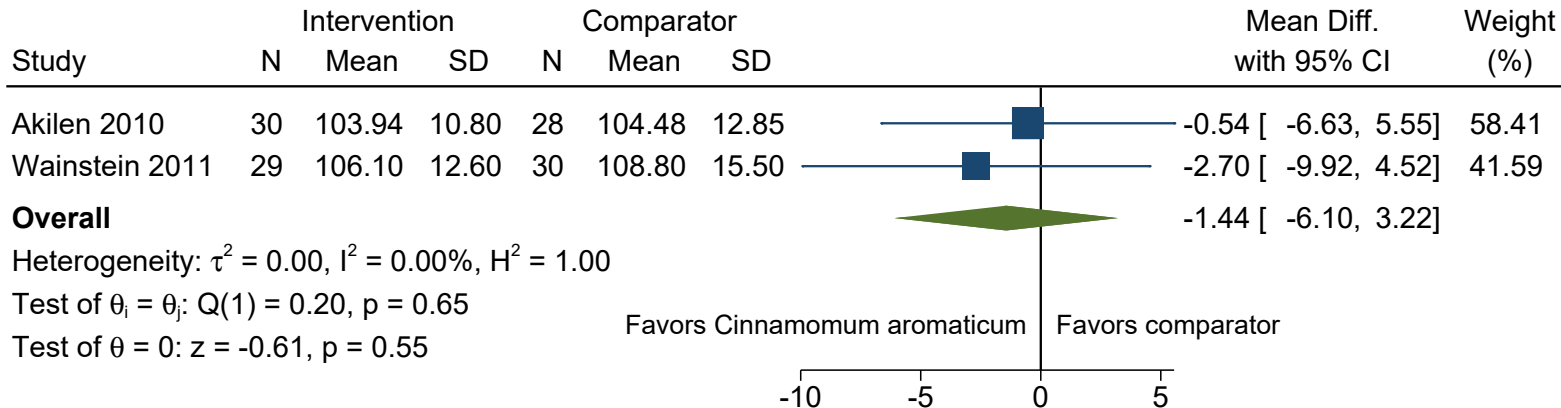

Random-effects REML model

Supplement: Data_Sheet_1.zip [file Data_Sheet_1.zip]

# Trigonella foenum-graecum - Fasting C-peptide

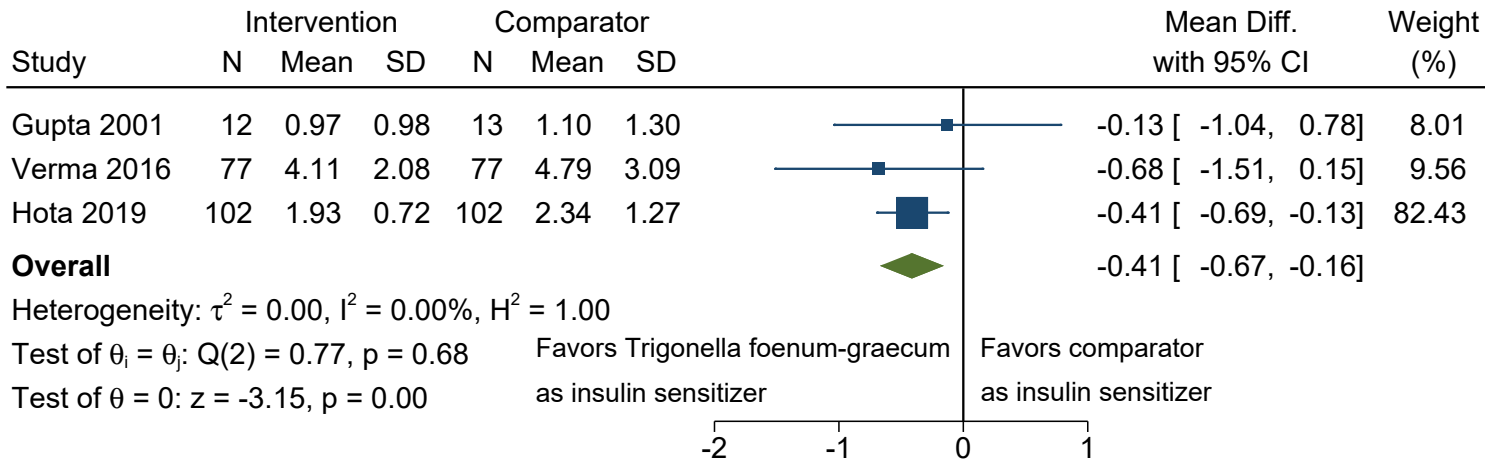

Supplement: Data_Sheet_1.zip [file Data_Sheet_1.zip]

# Azadirachta indica - FBG

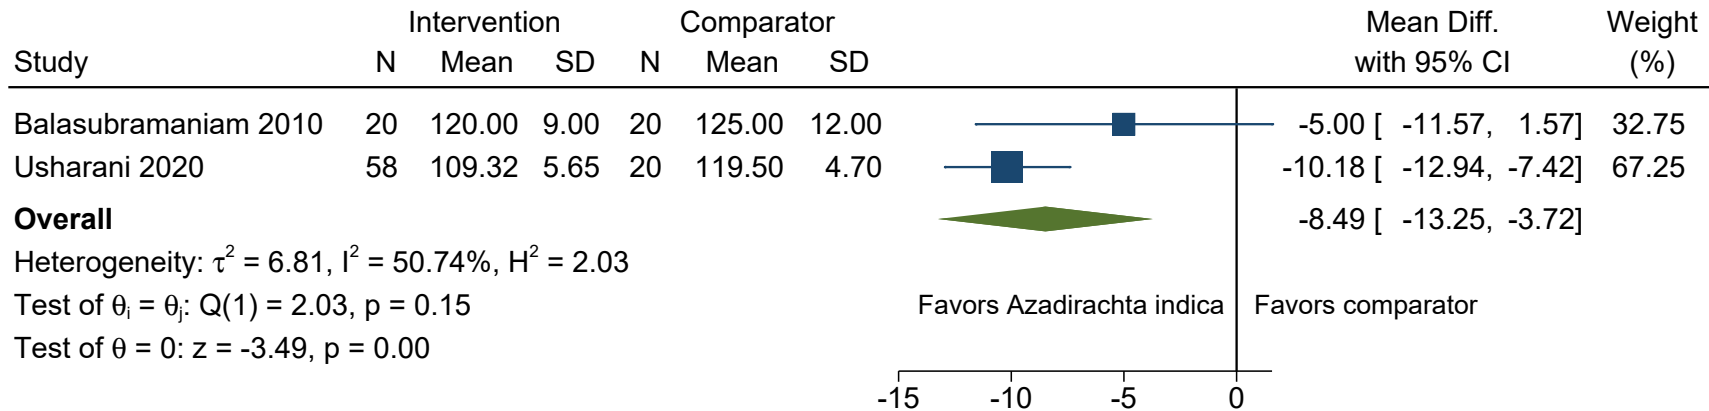

Random-effects REML model

Supplement: Data_Sheet_1.zip [file Data_Sheet_1.zip]

# Pterocarpus marsupium - FBG

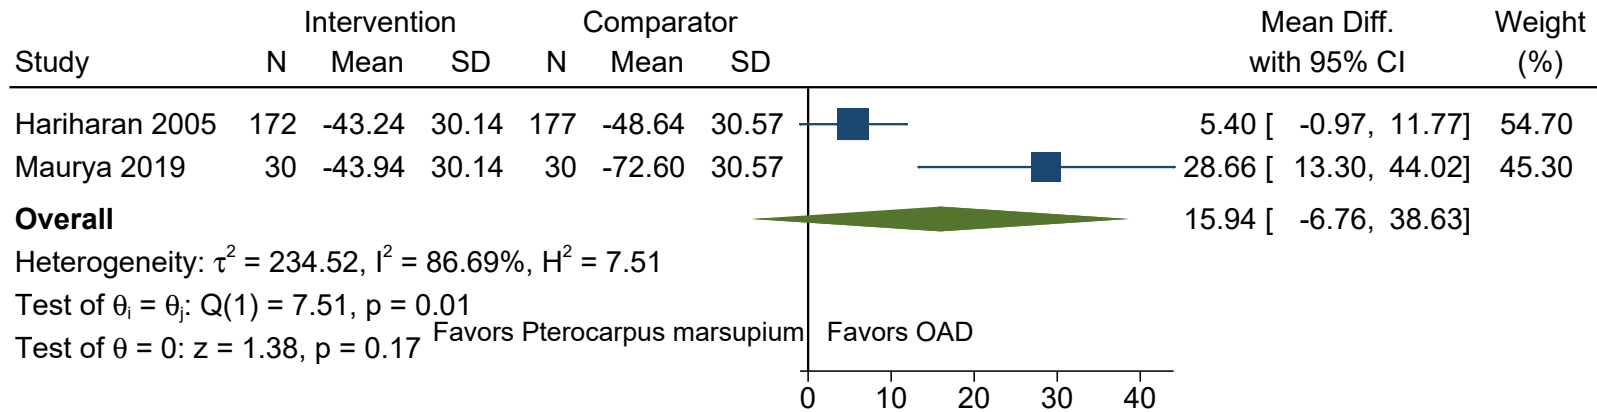

Random-effects REML model

Supplement: Data_Sheet_1.zip [file Data_Sheet_1.zip]

# Nigella sativa - FBG

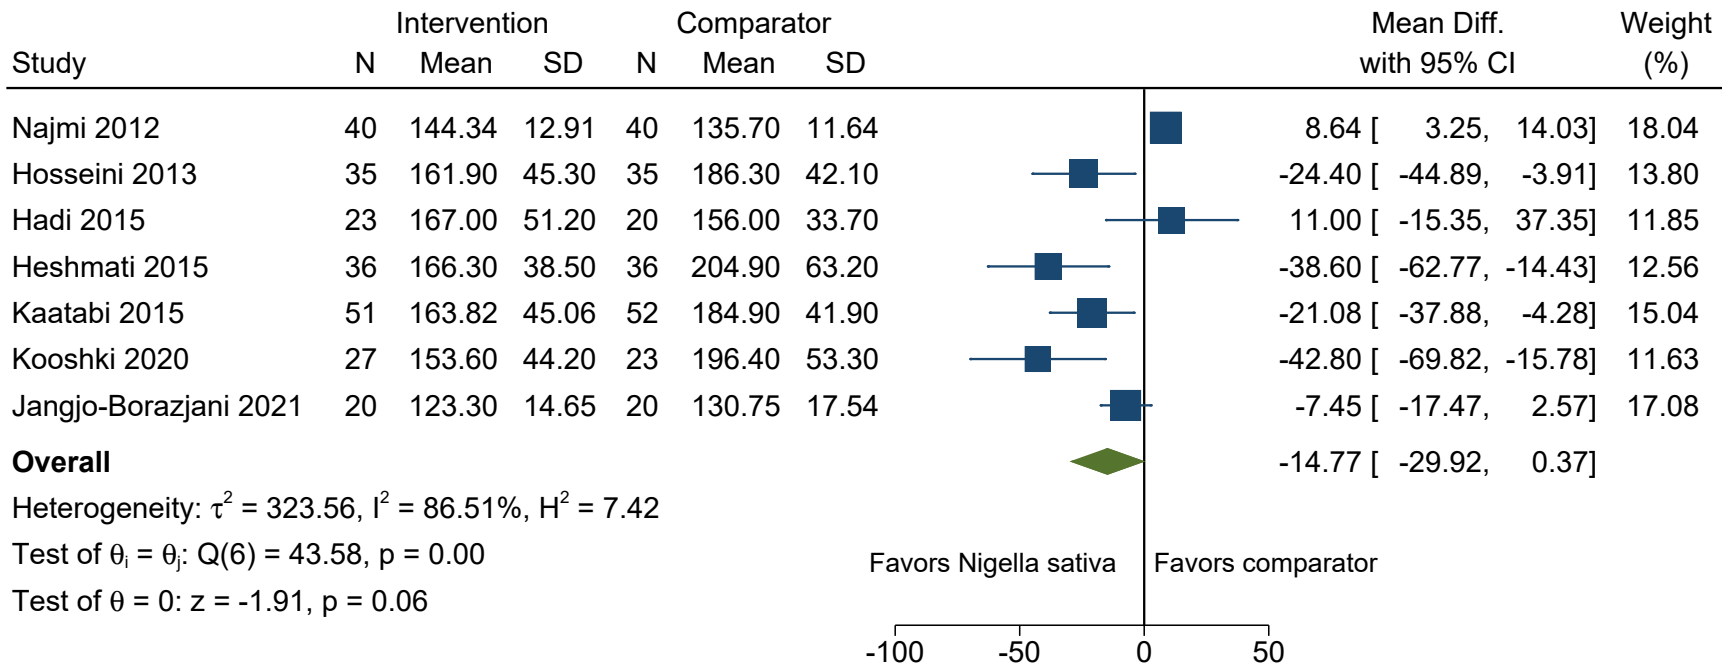

Supplement: Data_Sheet_1.zip [file Data_Sheet_1.zip]

# Zingiber officinale - DBP

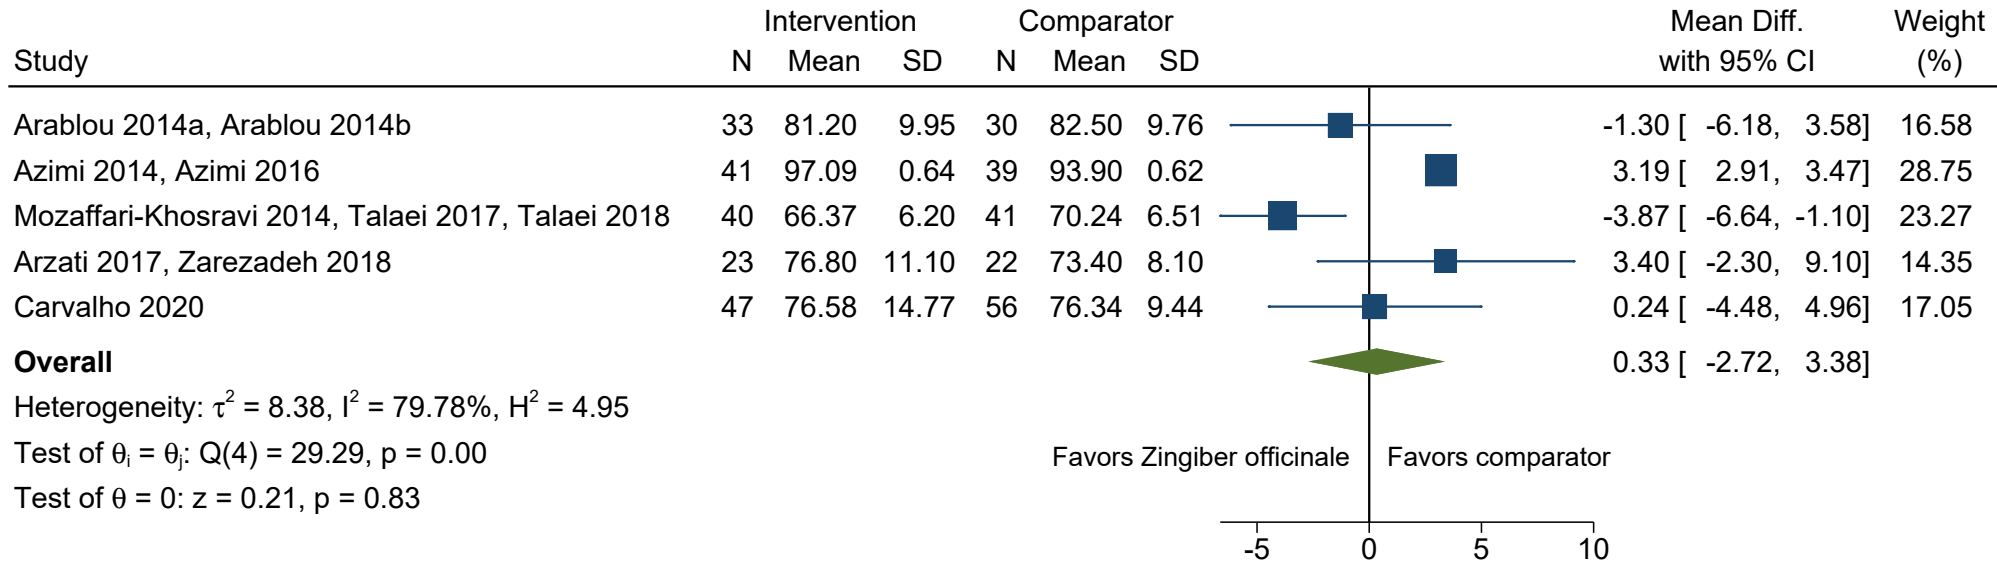

Supplement: Data_Sheet_1.zip [file Data_Sheet_1.zip]

# Zingiber officinale - FBG

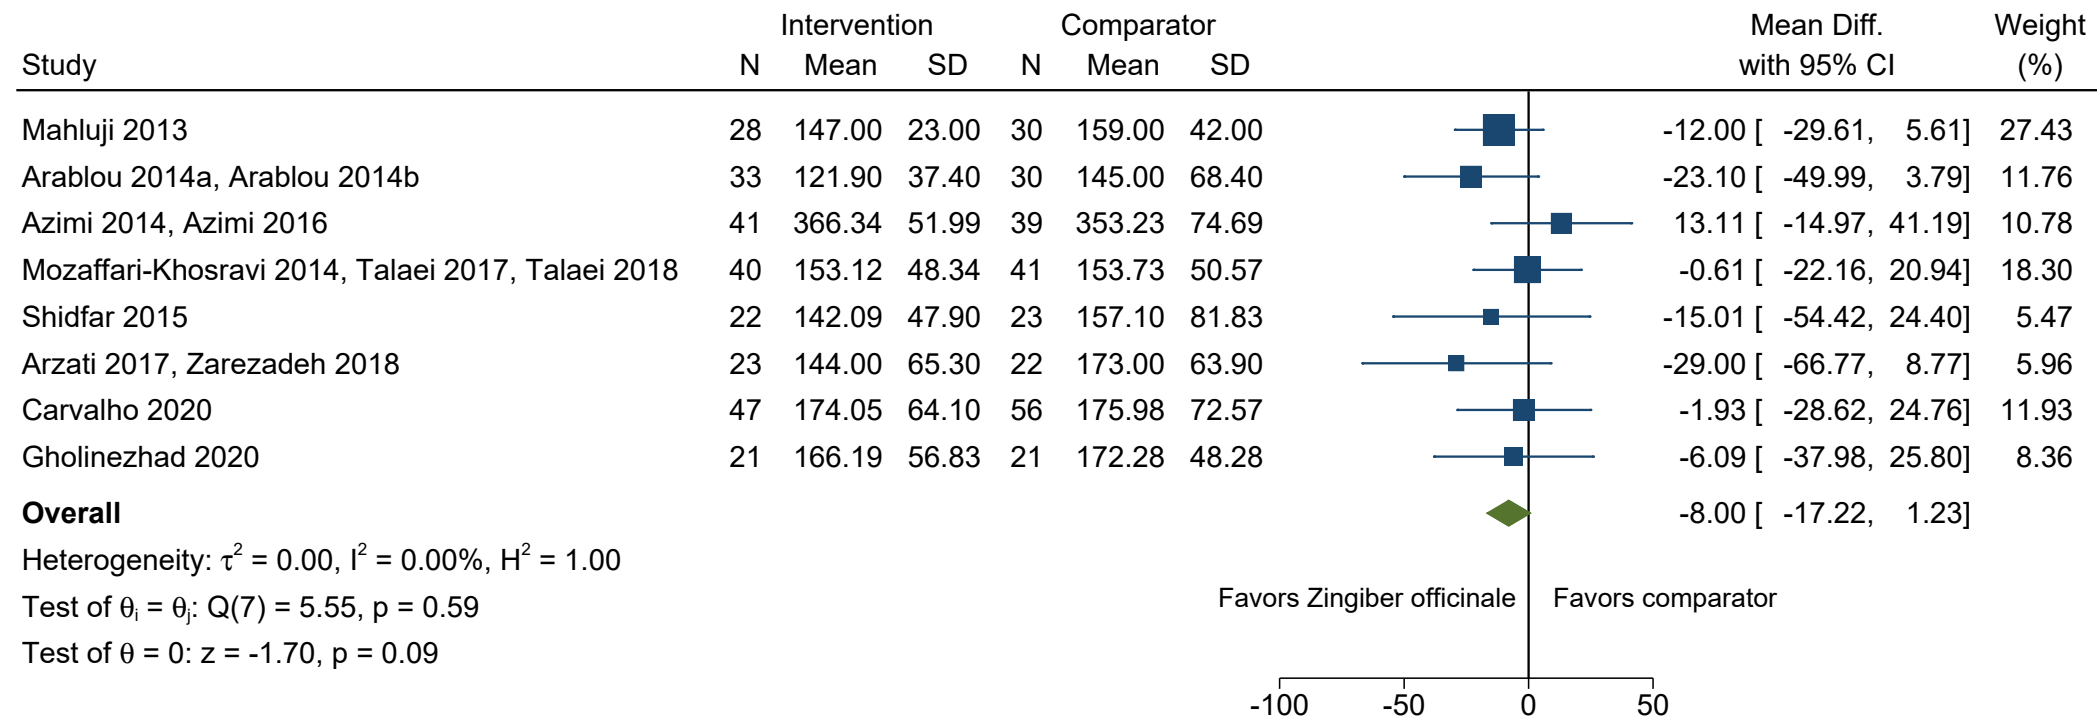

Supplement: Data_Sheet_1.zip [file Data_Sheet_1.zip]

# Cyamopsis tetragonoloba - DBP

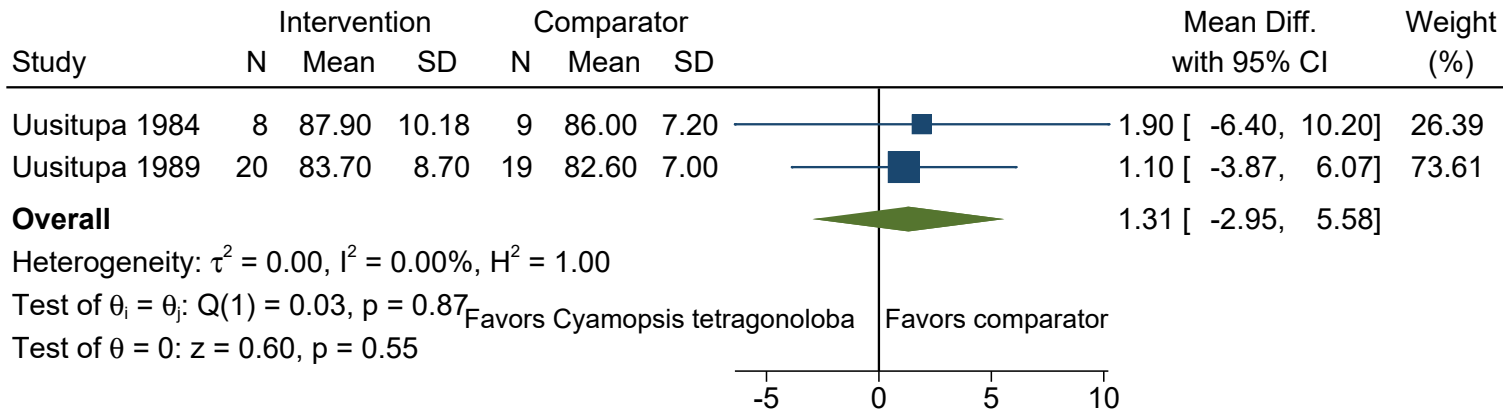

Random-effects REML model

Supplement: Data_Sheet_1.zip [file Data_Sheet_1.zip]

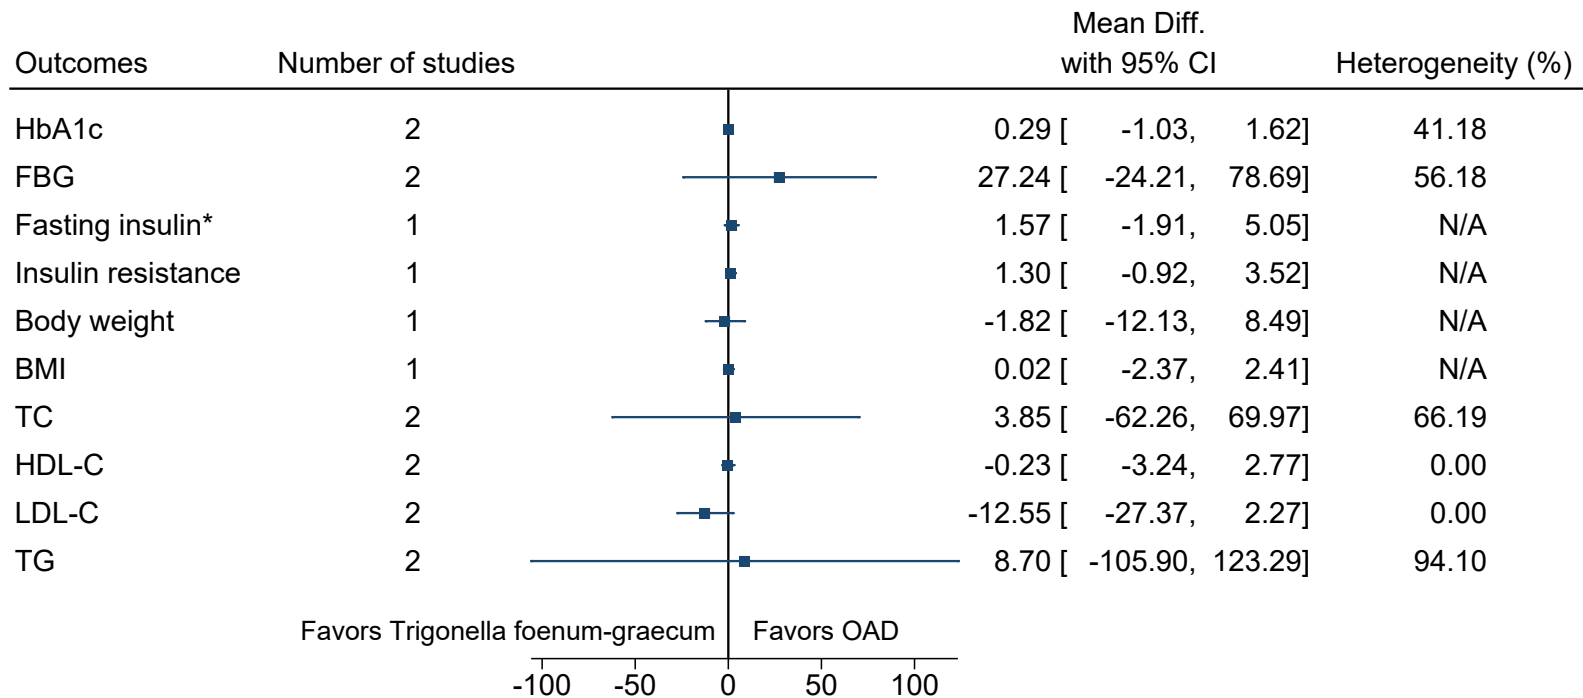

\*Favors intervention/comparator as insulin sensitizer

Supplement: Data_Sheet_1.zip [file Data_Sheet_1.zip]

# Shilajit - TG

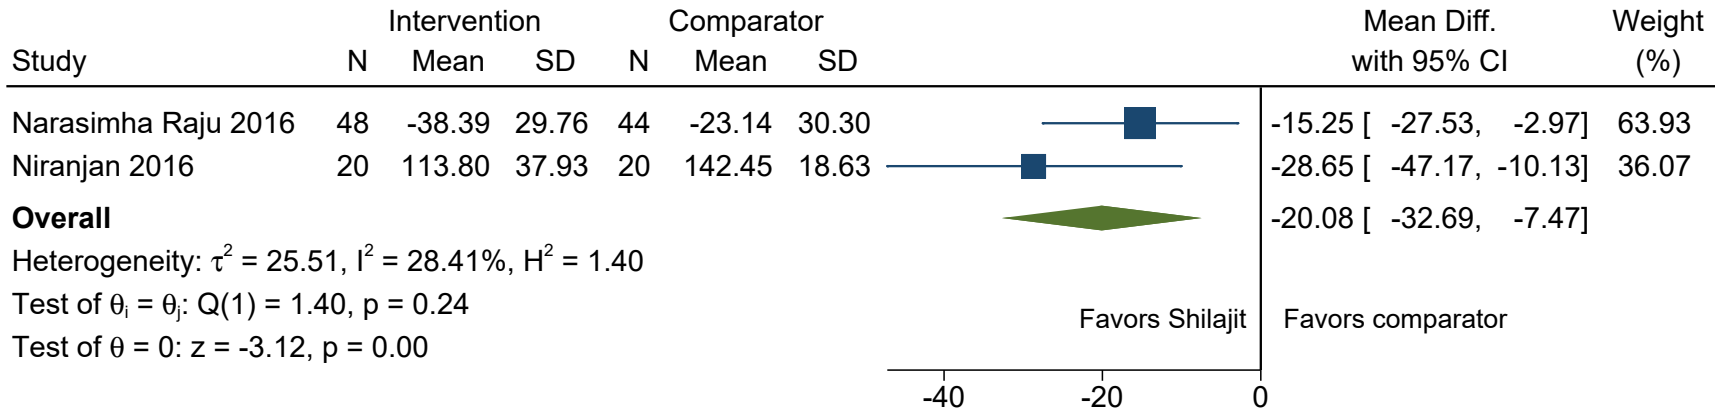

Random-effects REML model

Supplement: Data_Sheet_1.zip [file Data_Sheet_1.zip]

# Cinnamomum aromaticum - TG

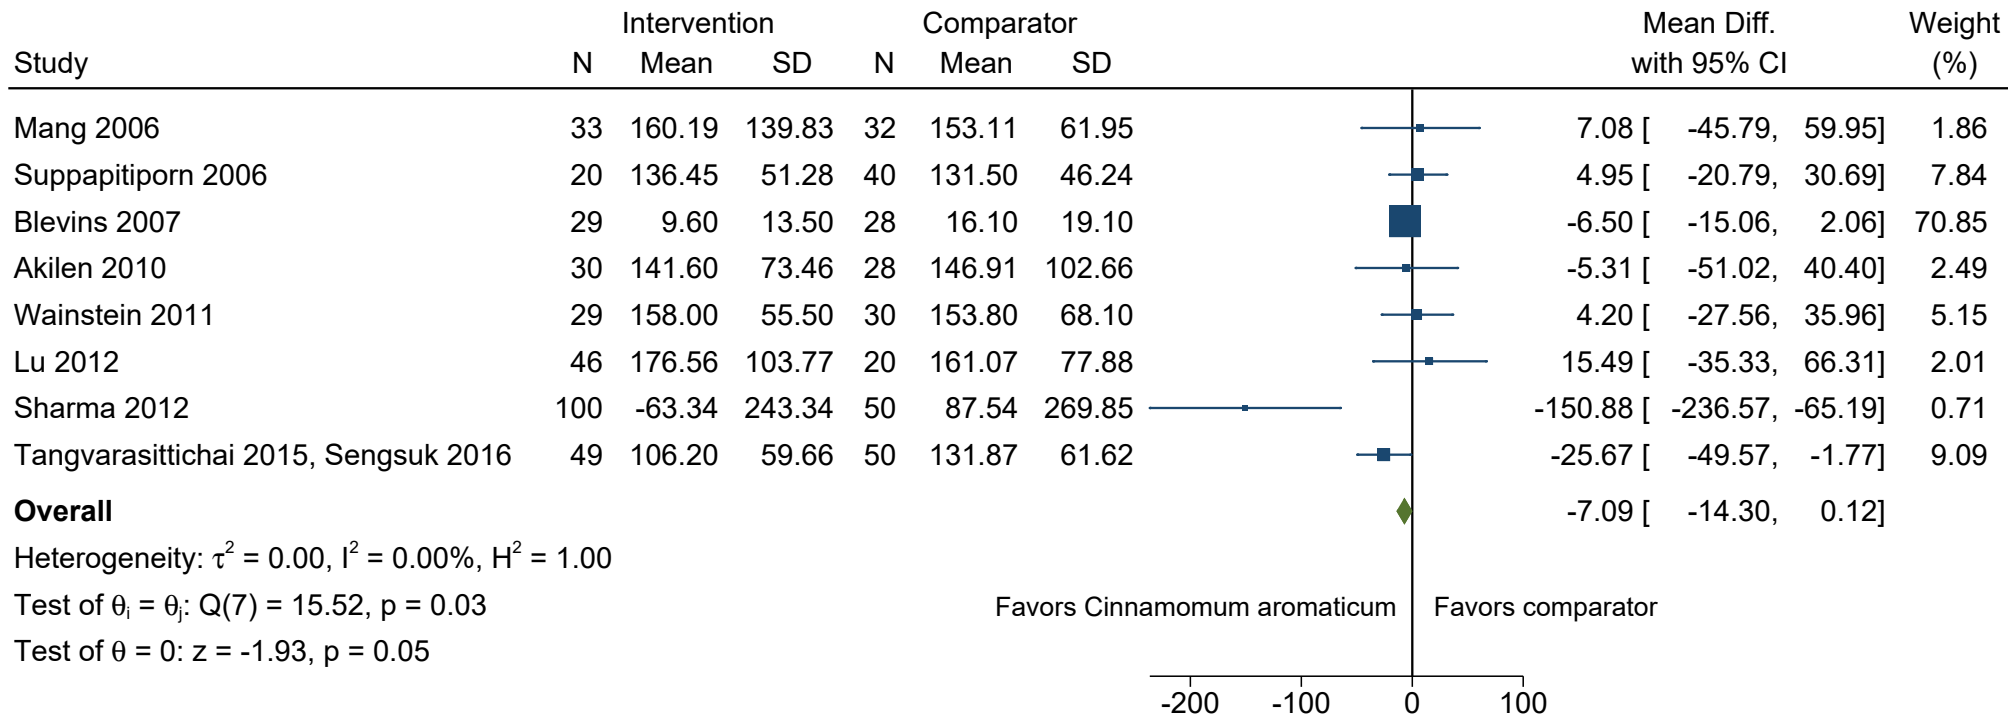

Supplement: Data_Sheet_1.zip [file Data_Sheet_1.zip]

# Momordica charantia - HbA1c - country subgroup analysis

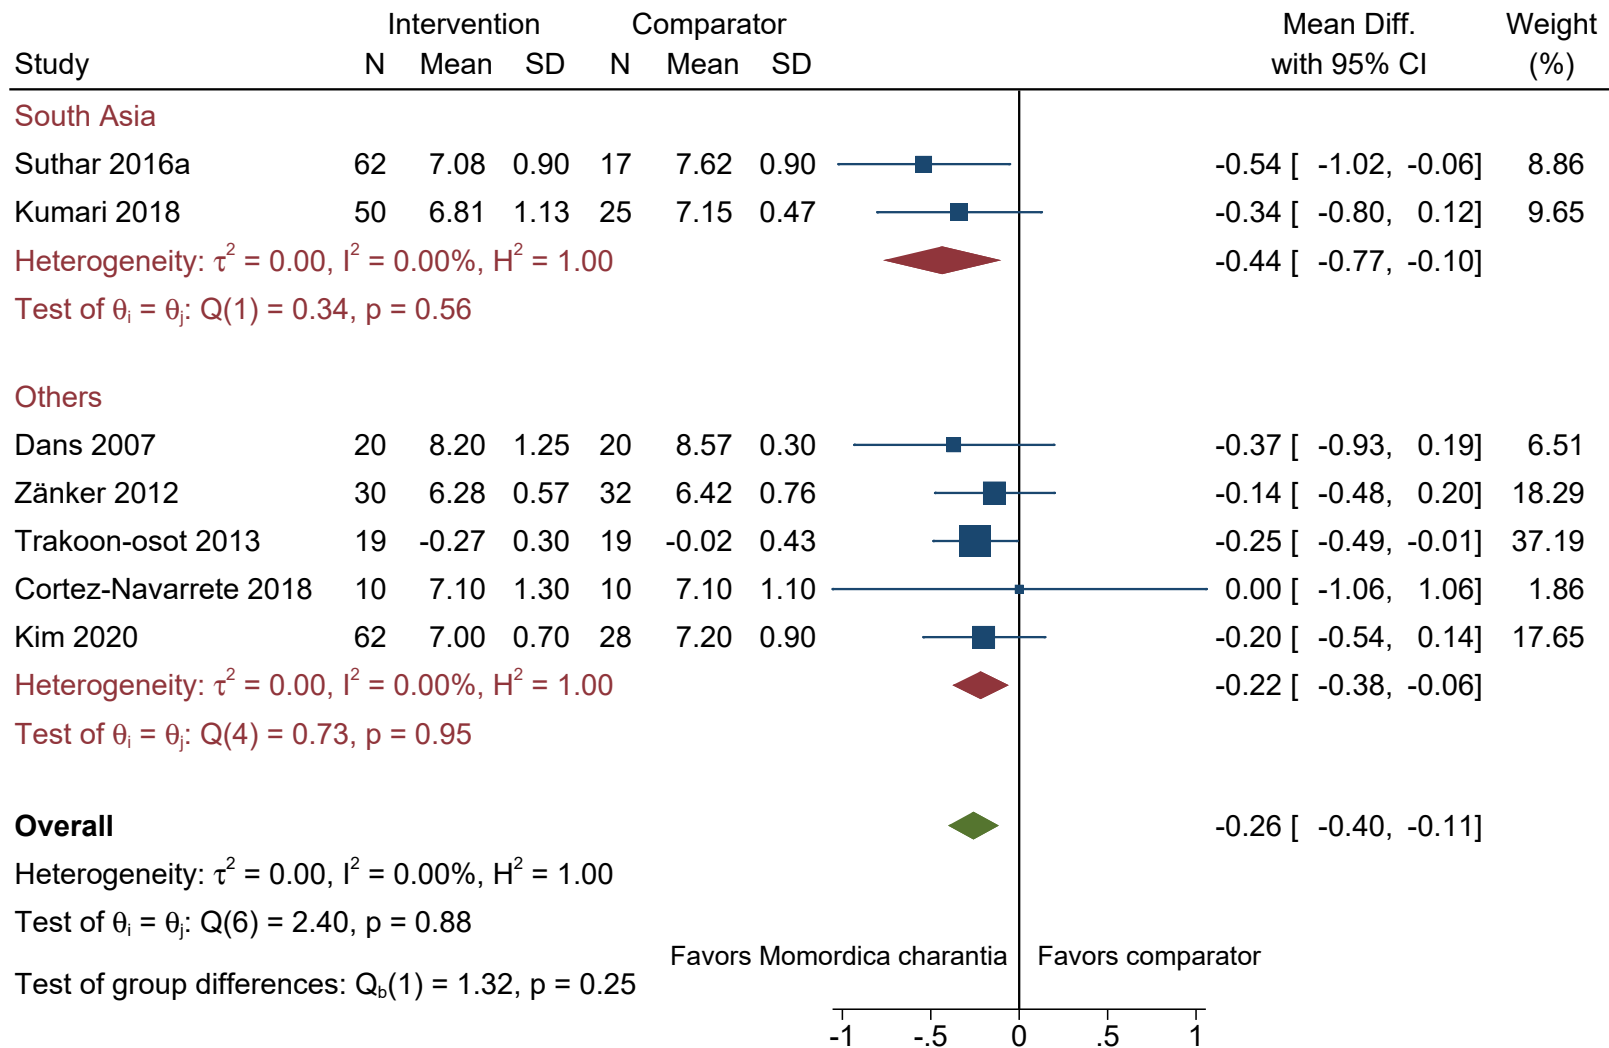

Supplement: Data_Sheet_1.zip [file Data_Sheet_1.zip]

# Portulaca oleracea - FBG

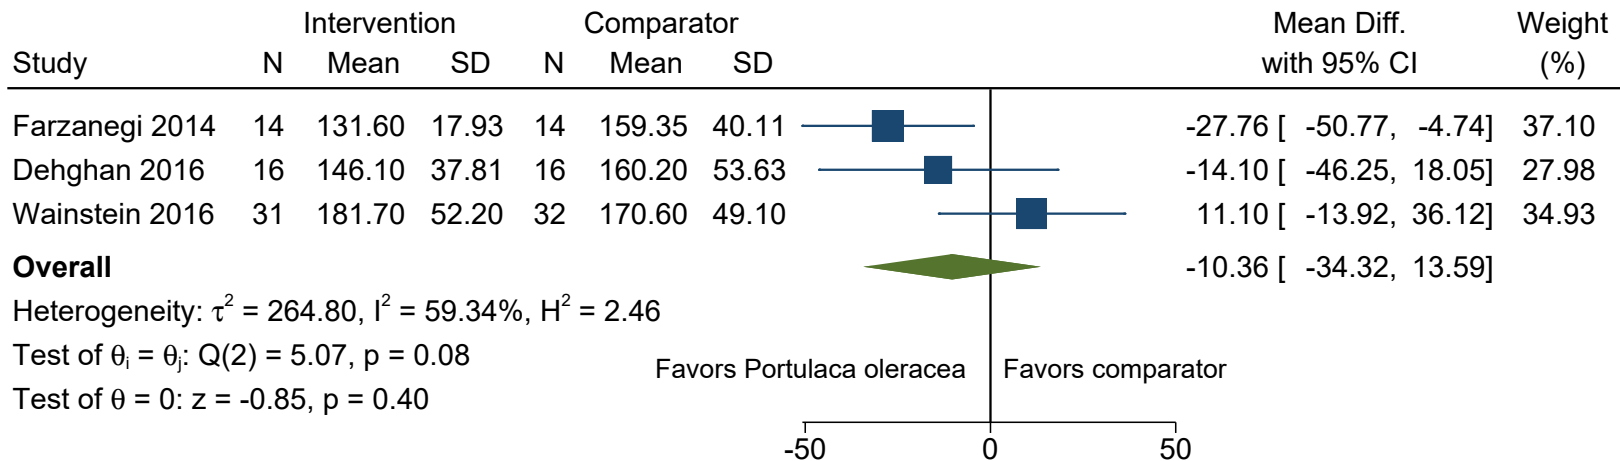

Random-effects REML model

Supplement: Data_Sheet_1.zip [file Data_Sheet_1.zip]

# Urtica dioica - Insulin resistance

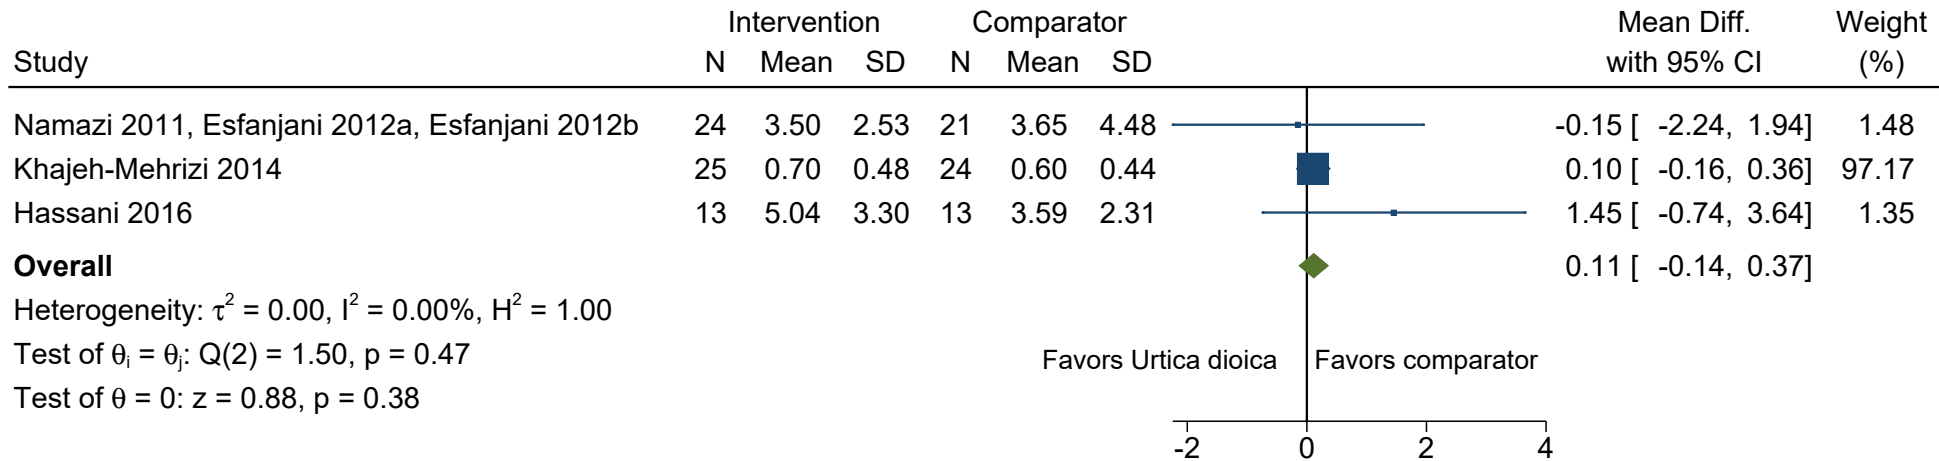

Supplement: Data_Sheet_1.zip [file Data_Sheet_1.zip]
