# Supplementary figures and images for: Effectiveness and Safety of Ayurvedic Medicines in Type 2 Diabetes Mellitus Management: A Systematic Review and Meta-Analysis (part 3 of 4)
Source: Frontiers journal article supplement (doi:10.3389/fphar.2022.821810), 2022-06-08

# Cinnamomum verum - HbA1c

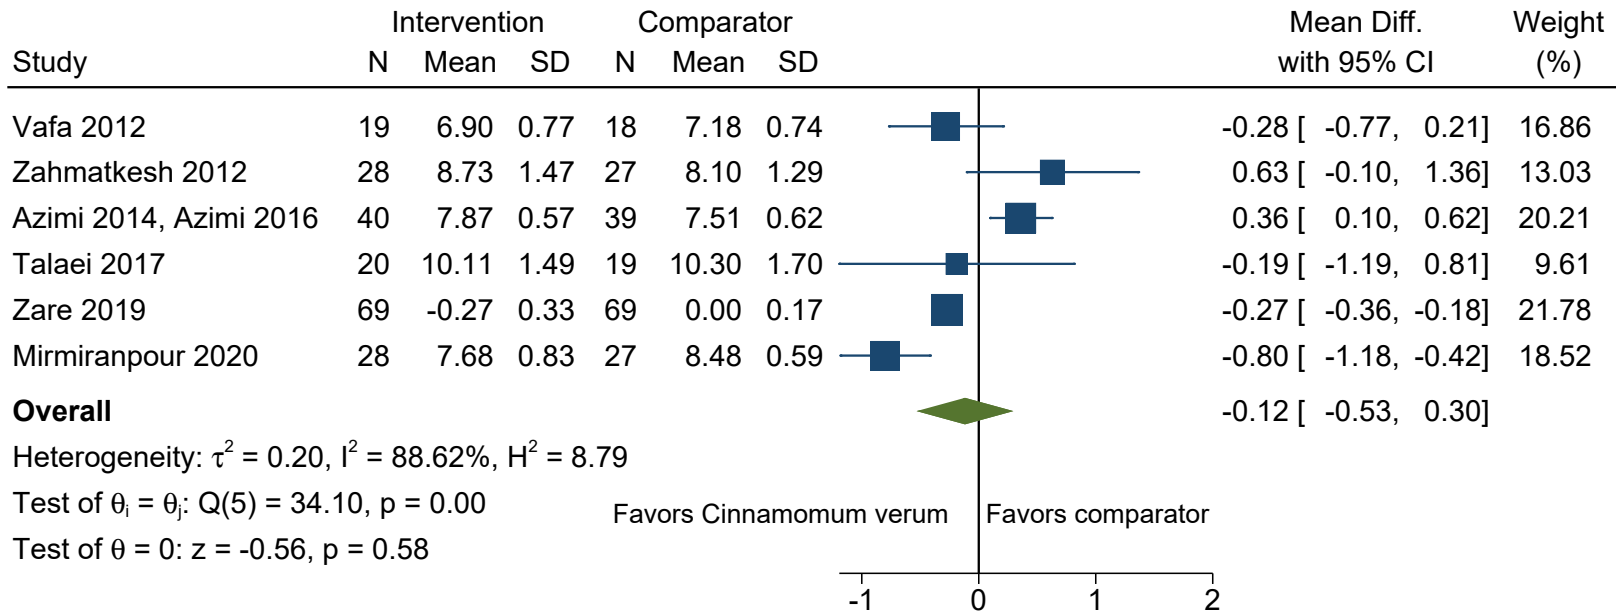

Supplement: Data_Sheet_1.zip [file Data_Sheet_1.zip]

# Aloe vera - TG

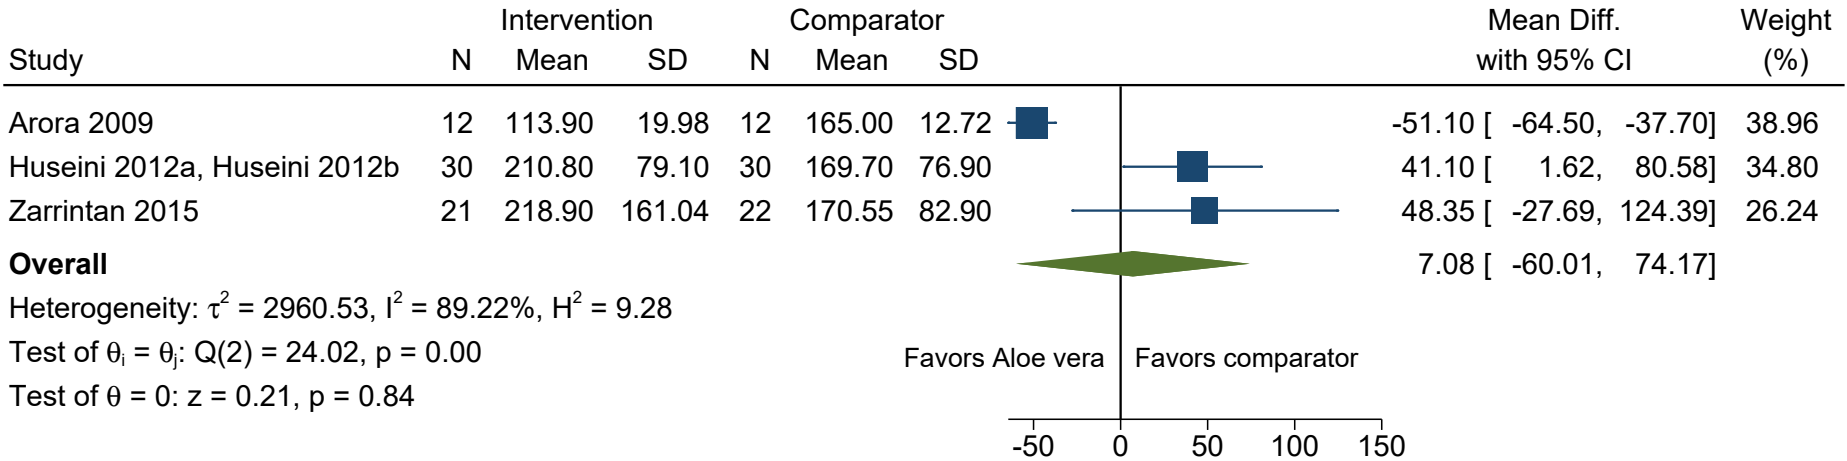

Random-effects REML model

Supplement: Data_Sheet_1.zip [file Data_Sheet_1.zip]

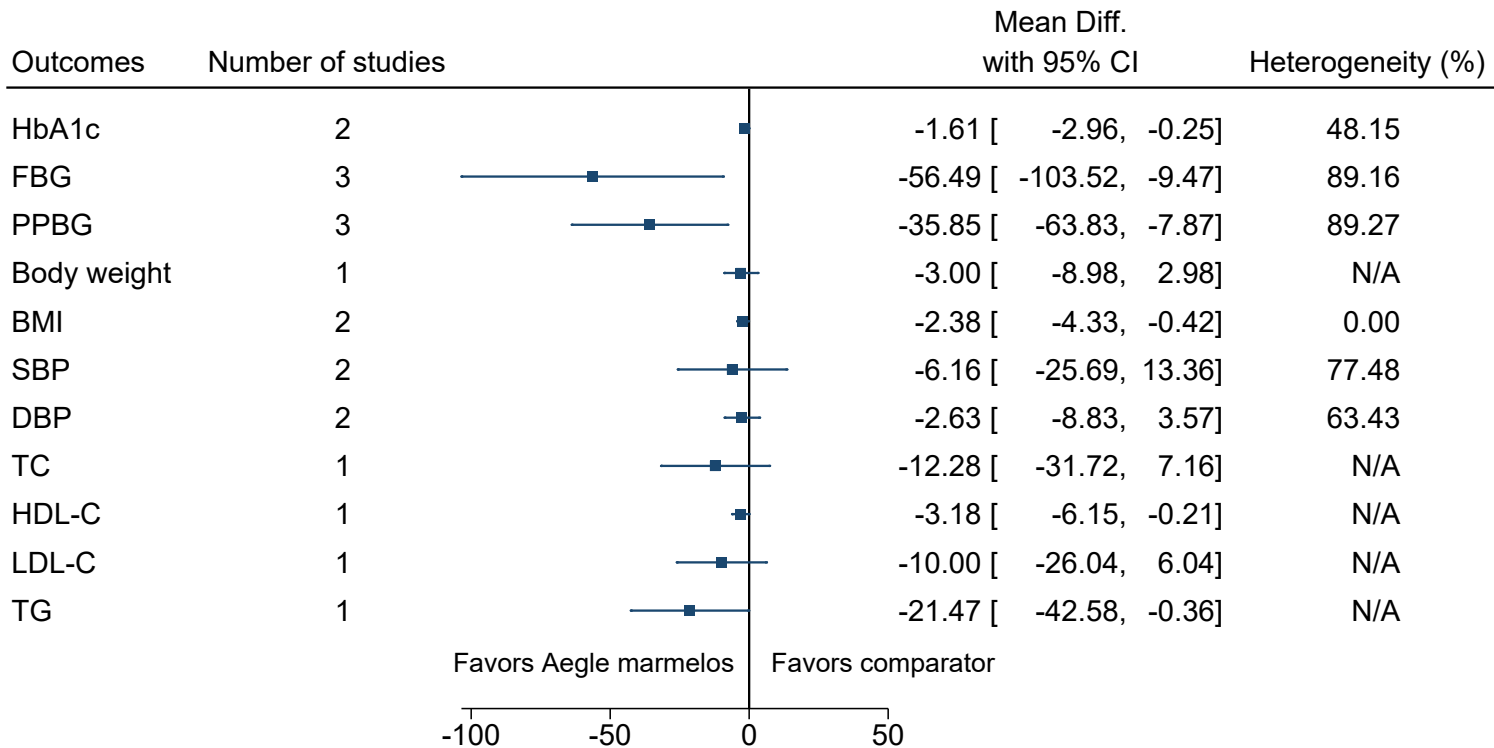

Supplement: Data_Sheet_1.zip [file Data_Sheet_1.zip]

# Aegle marmelos - HbA1c

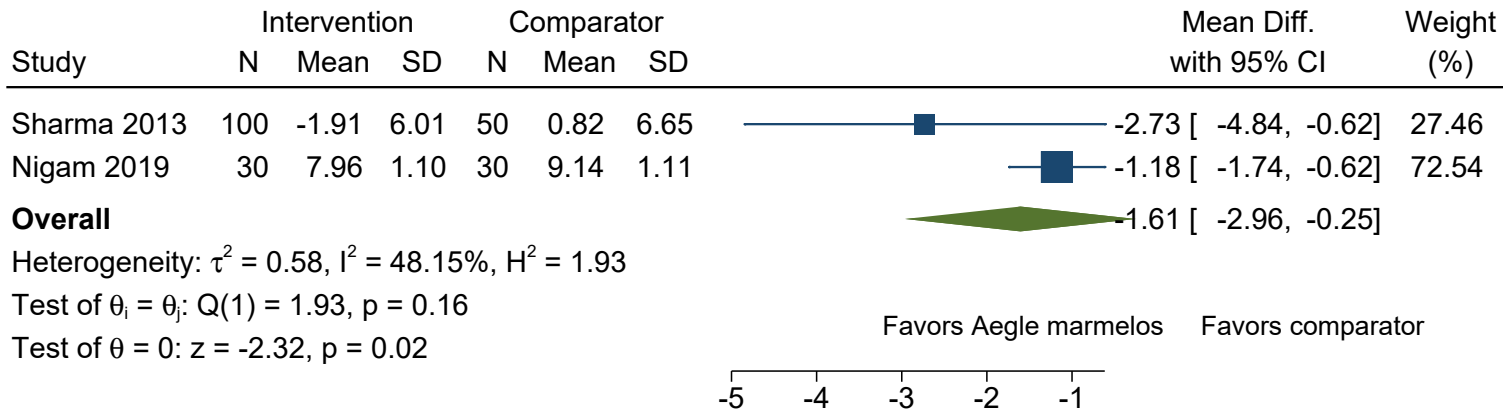

Random-effects REML model

Supplement: Data_Sheet_1.zip [file Data_Sheet_1.zip]

# Nigella sativa - BMI

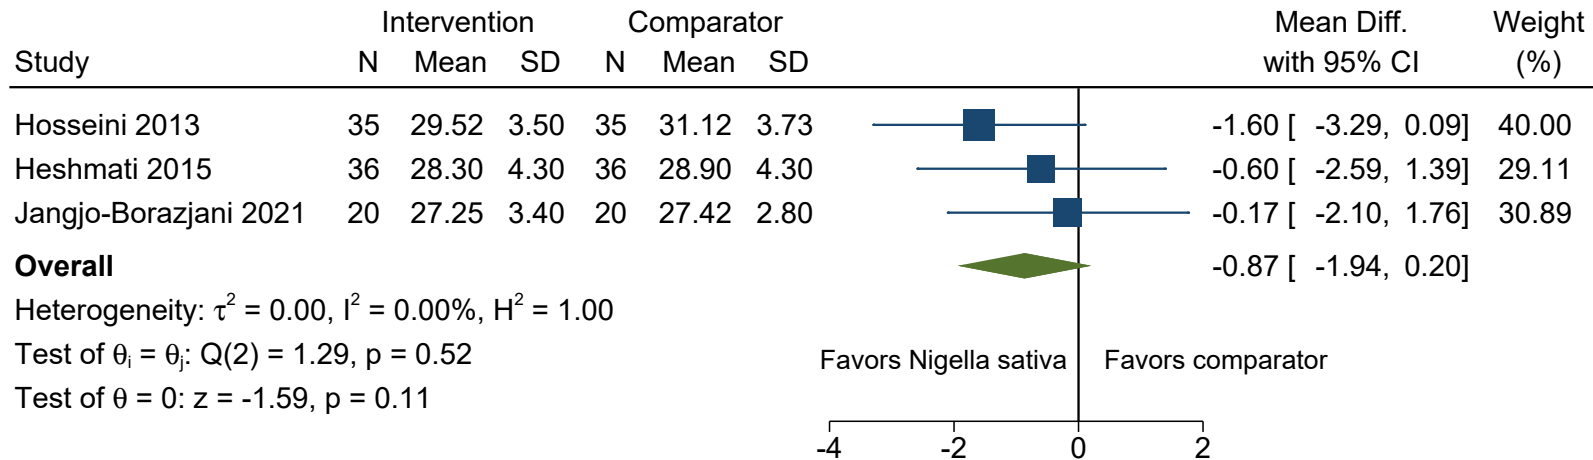

Random-effects REML model

Supplement: Data_Sheet_1.zip [file Data_Sheet_1.zip]

# Portulaca oleracea - TC

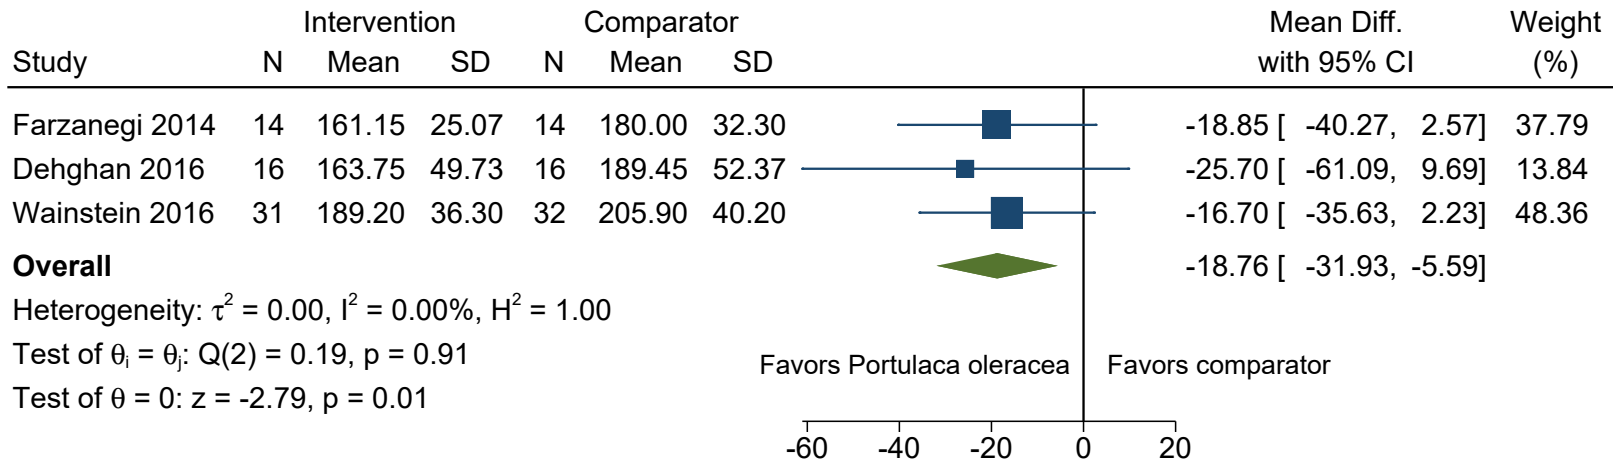

Random-effects REML model

Supplement: Data_Sheet_1.zip [file Data_Sheet_1.zip]

# Cinnamomum verum - DBP

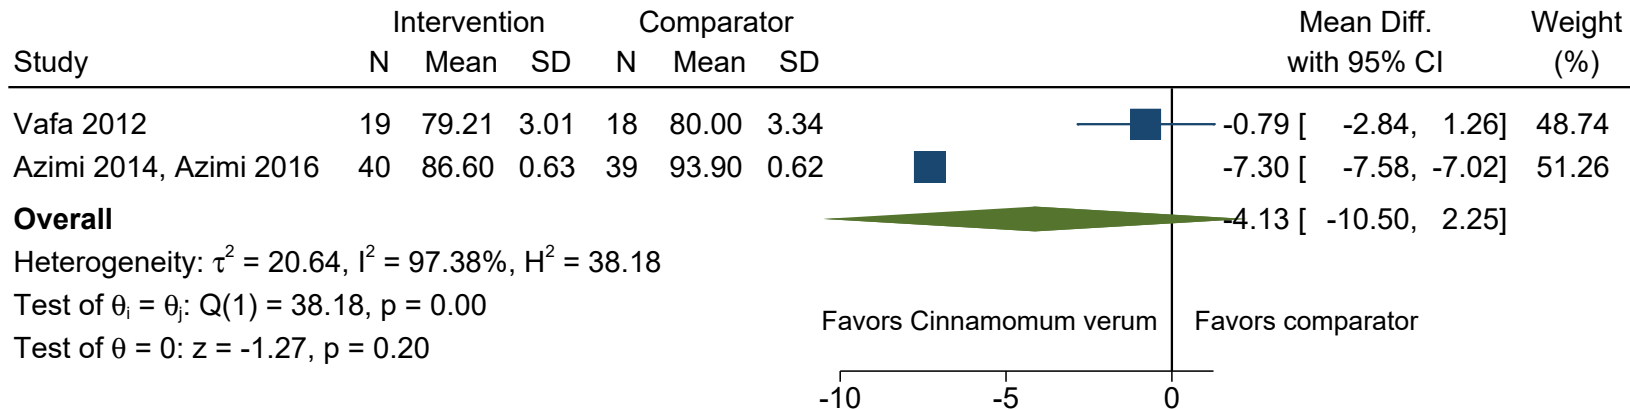

Random-effects REML model

Supplement: Data_Sheet_1.zip [file Data_Sheet_1.zip]

# Curcuma longa - Fasting insulin

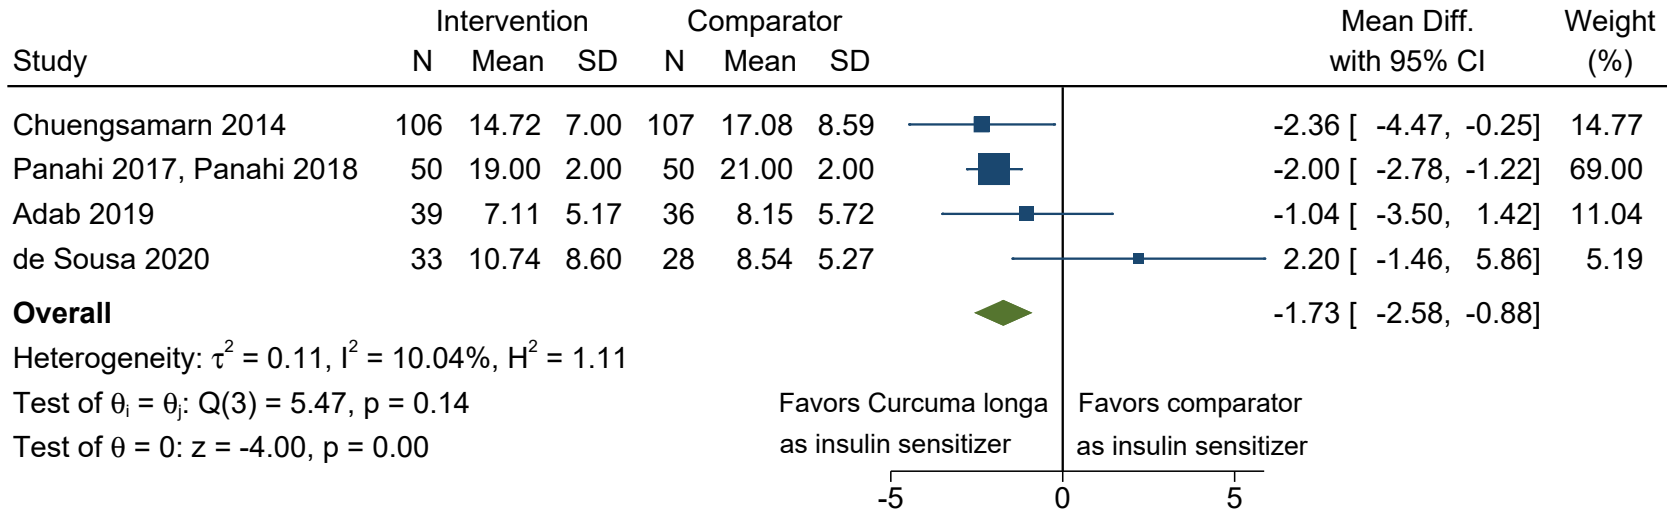

Random-effects REML model

Supplement: Data_Sheet_1.zip [file Data_Sheet_1.zip]

# Urtica dioica - TG

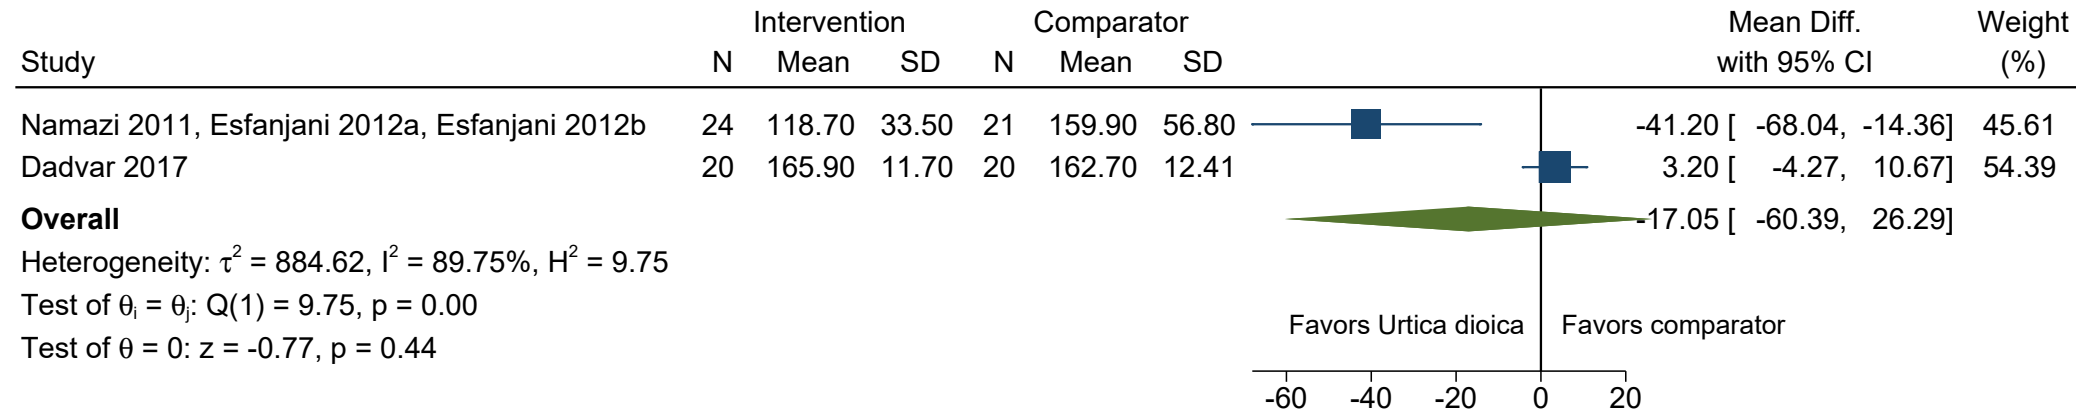

Random-effects REML model

Supplement: Data_Sheet_1.zip [file Data_Sheet_1.zip]

# Elettaria cardamomum - HDL-C

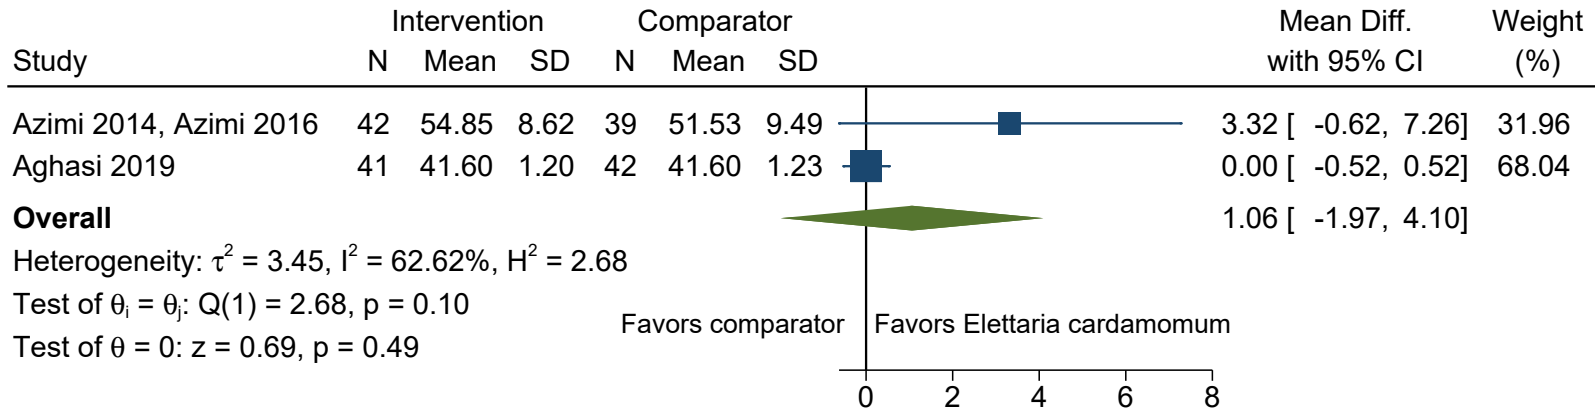

Random-effects REML model

Supplement: Data_Sheet_1.zip [file Data_Sheet_1.zip]

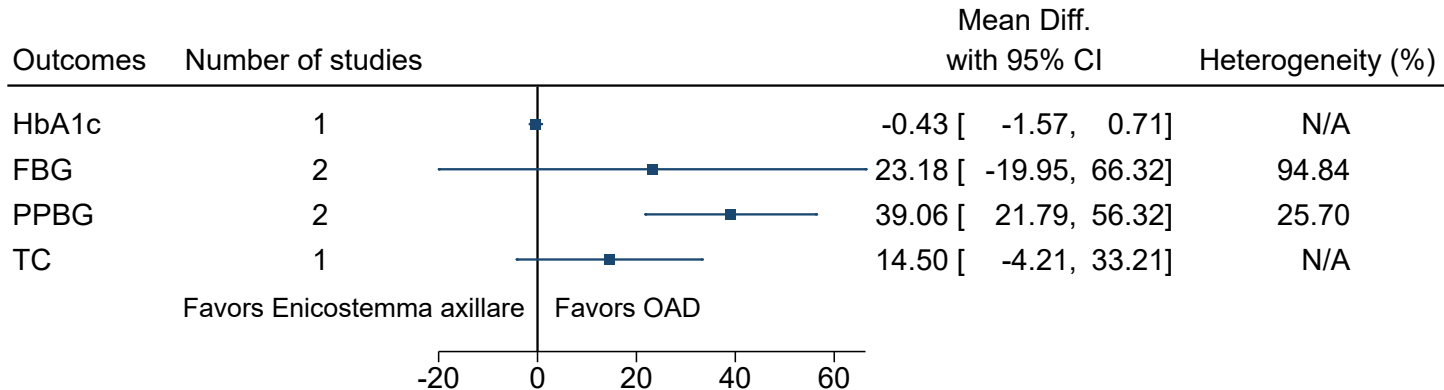

Supplement: Data_Sheet_1.zip [file Data_Sheet_1.zip]

# Cyamopsis tetragonoloba - TC

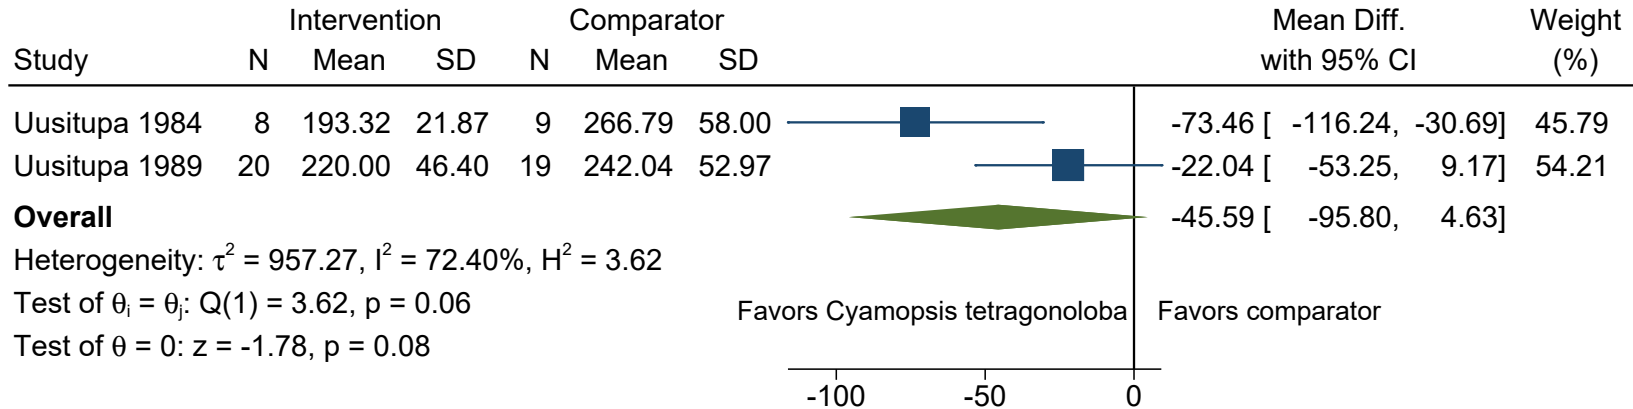

Random-effects REML model

Supplement: Data_Sheet_1.zip [file Data_Sheet_1.zip]

# Cinnamomum aromaticum - HDL-C

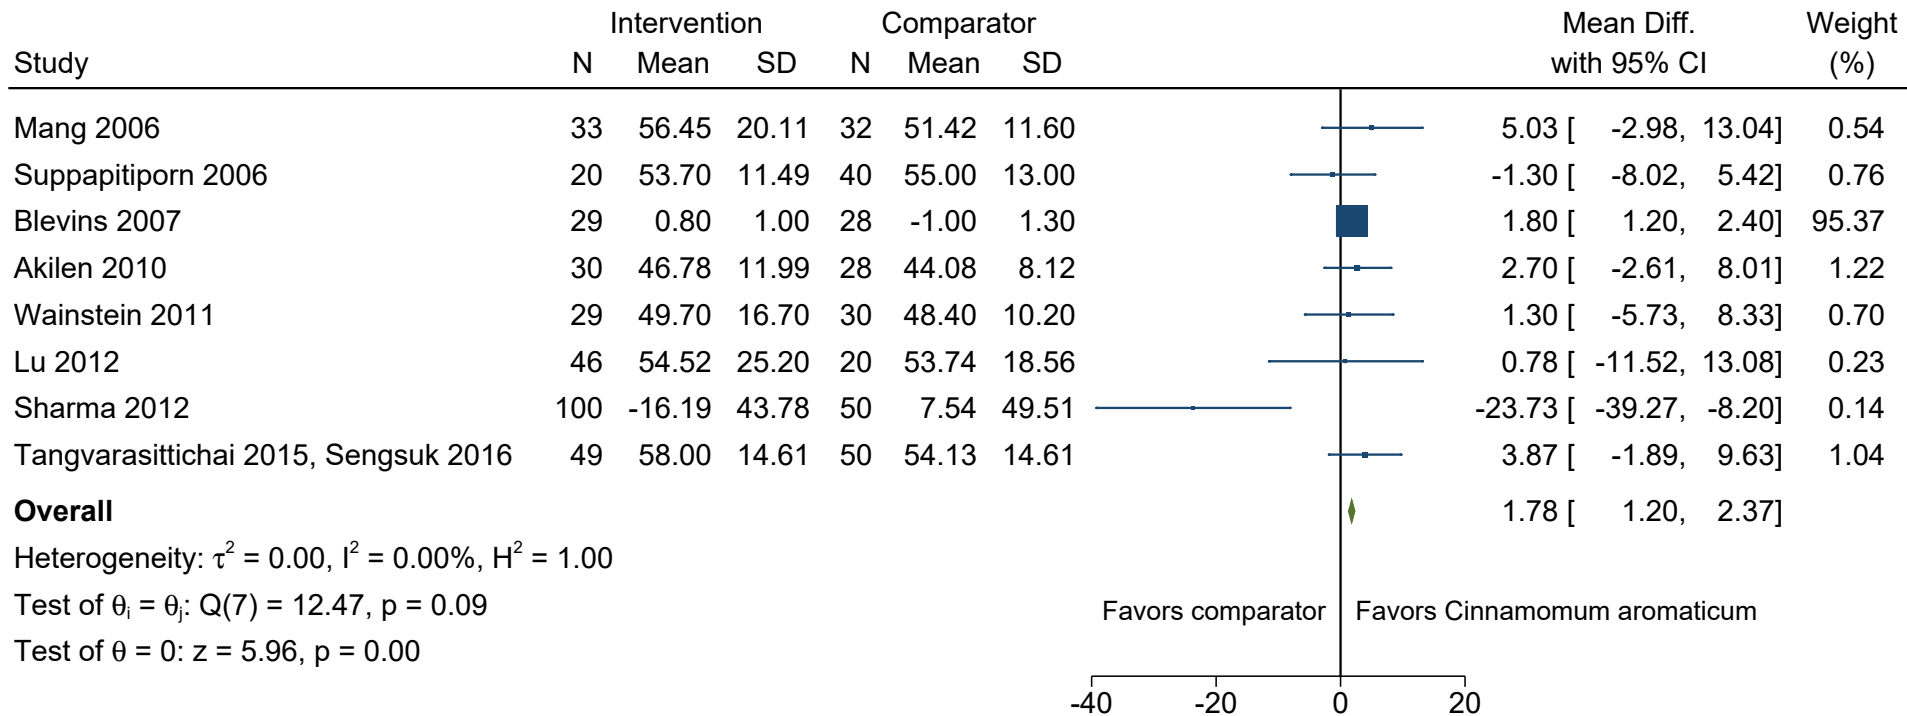

Supplement: Data_Sheet_1.zip [file Data_Sheet_1.zip]

# Allium sativum - TC

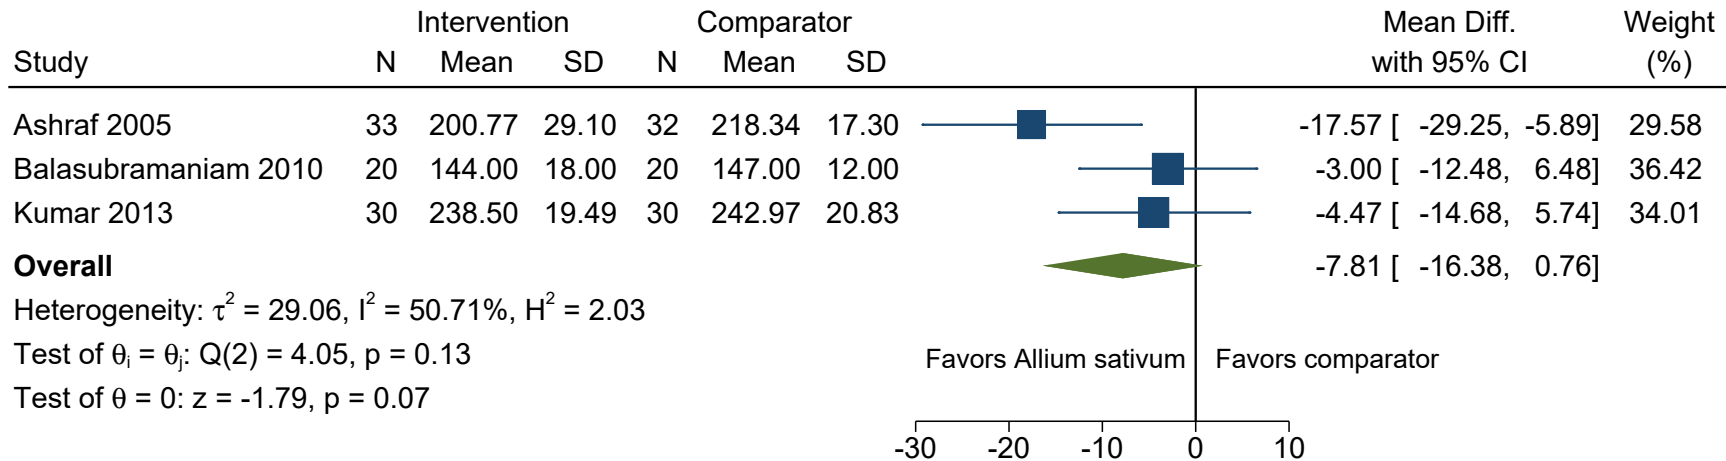

Random-effects REML model

Supplement: Data_Sheet_1.zip [file Data_Sheet_1.zip]

# Momordica charantia - HbA1c

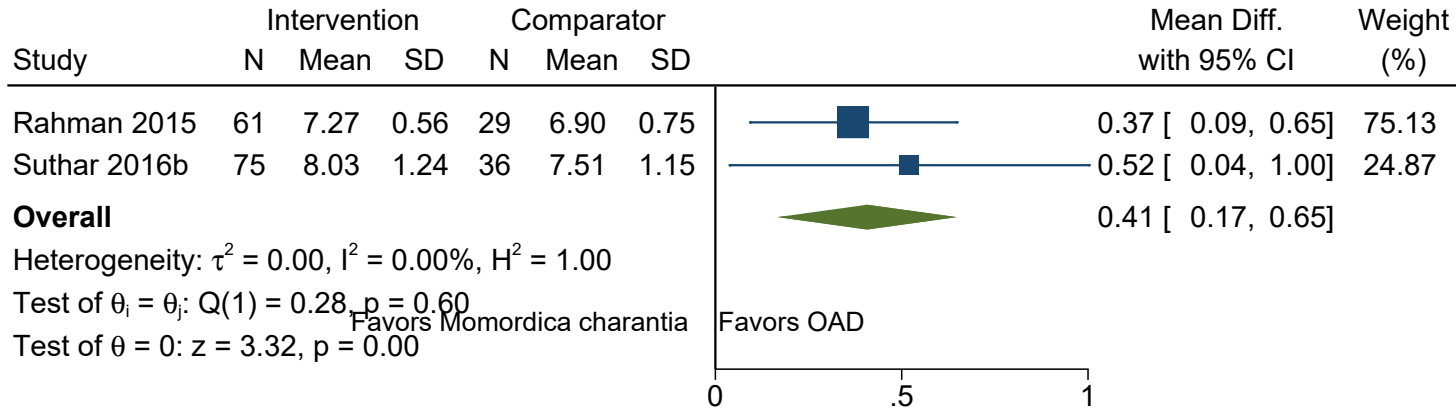

Random-effects REML model

Supplement: Data_Sheet_1.zip [file Data_Sheet_1.zip]

# Cinnamomum verum - PPBG

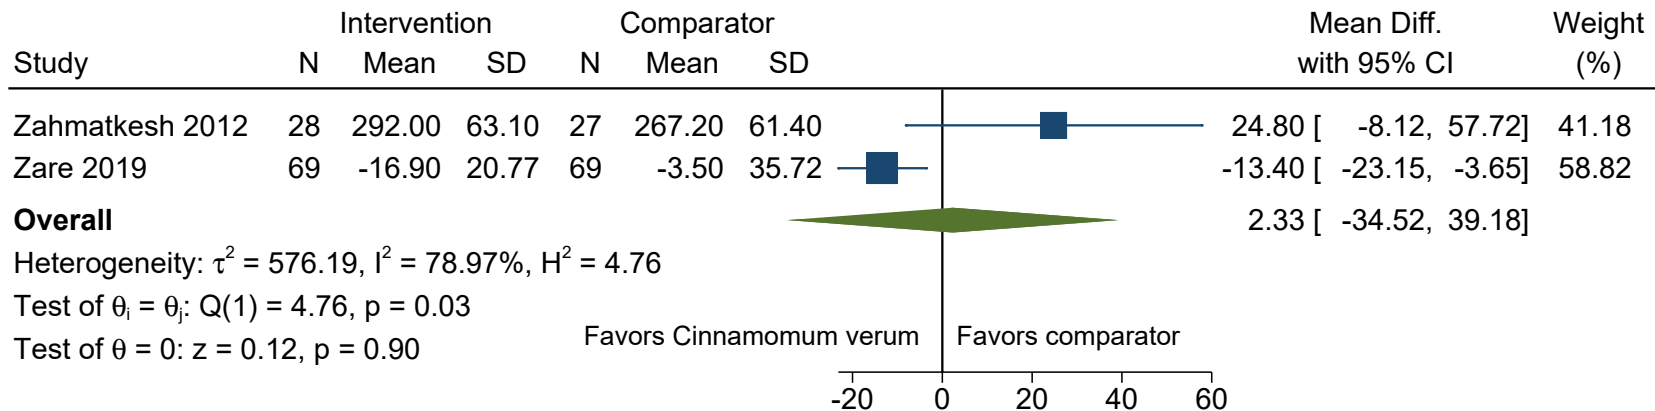

Random-effects REML model

Supplement: Data_Sheet_1.zip [file Data_Sheet_1.zip]

# Punica granatum - Fasting insulin

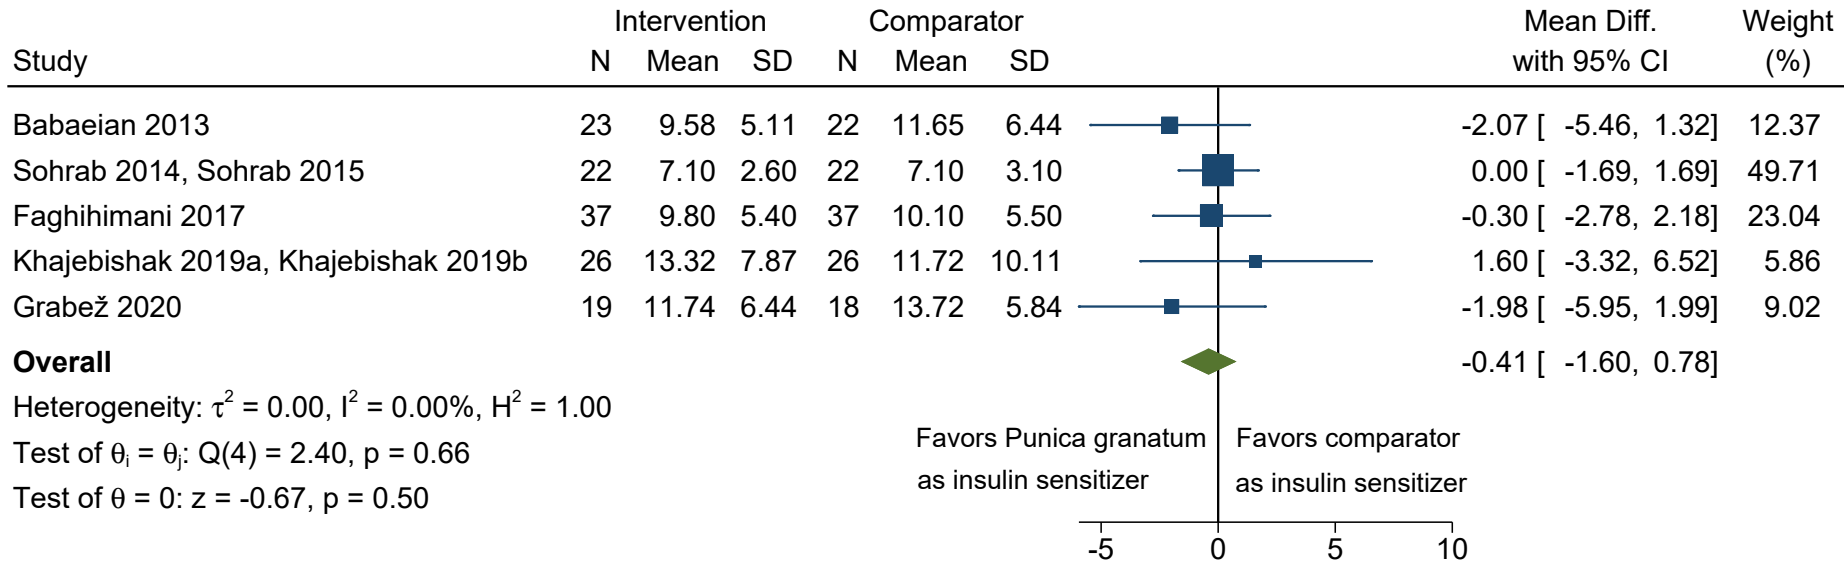

Supplement: Data_Sheet_1.zip [file Data_Sheet_1.zip]

# Punica granatum - FBG

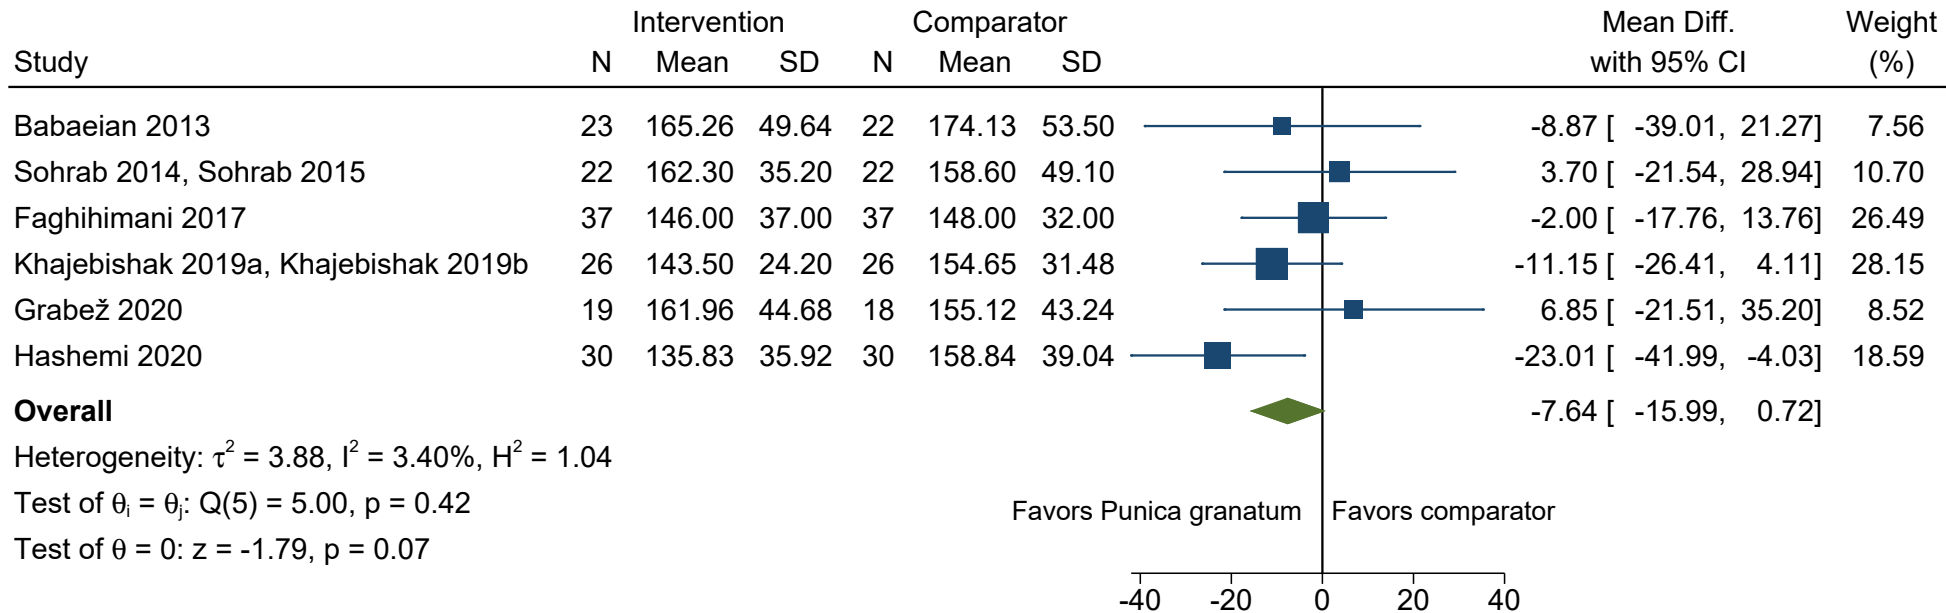

Random-effects REML model

Supplement: Data_Sheet_1.zip [file Data_Sheet_1.zip]

# Momordica charantia - BMI

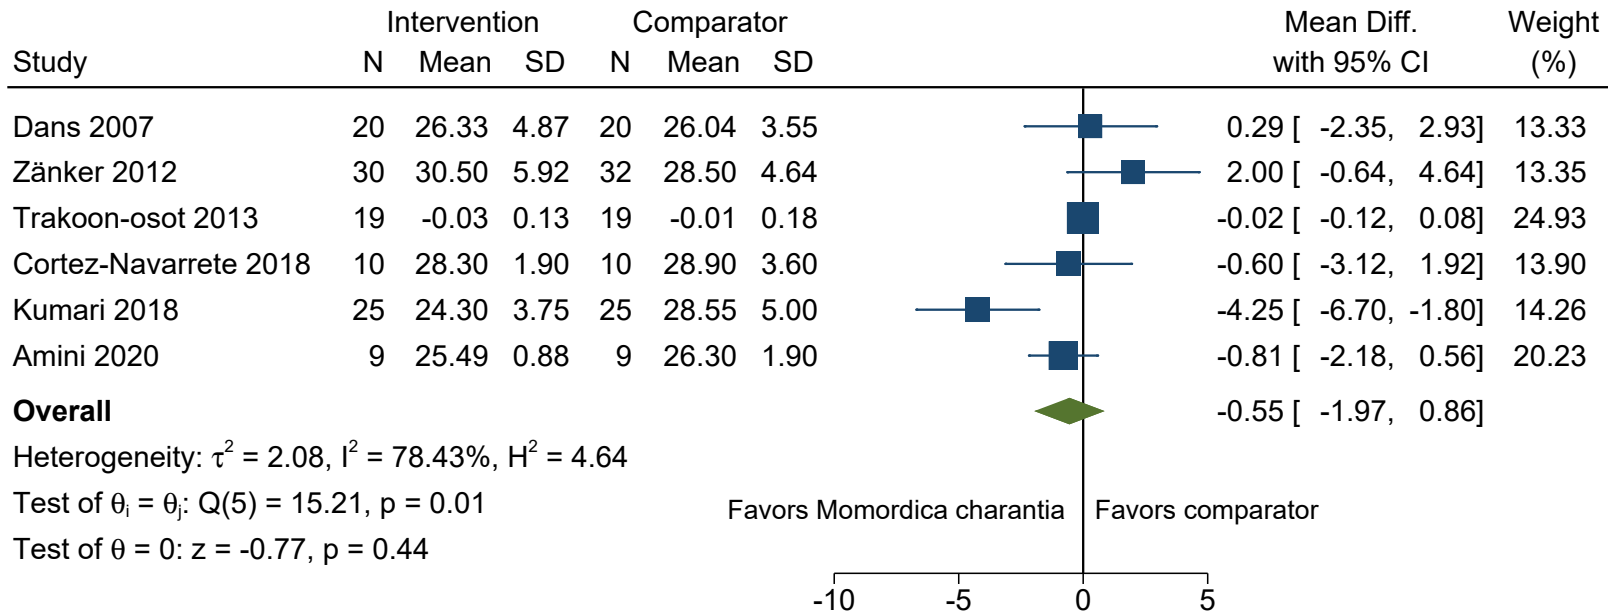

Random-effects REML model

Supplement: Data_Sheet_1.zip [file Data_Sheet_1.zip]

# Trigonella foenum-graecum - LDL-C

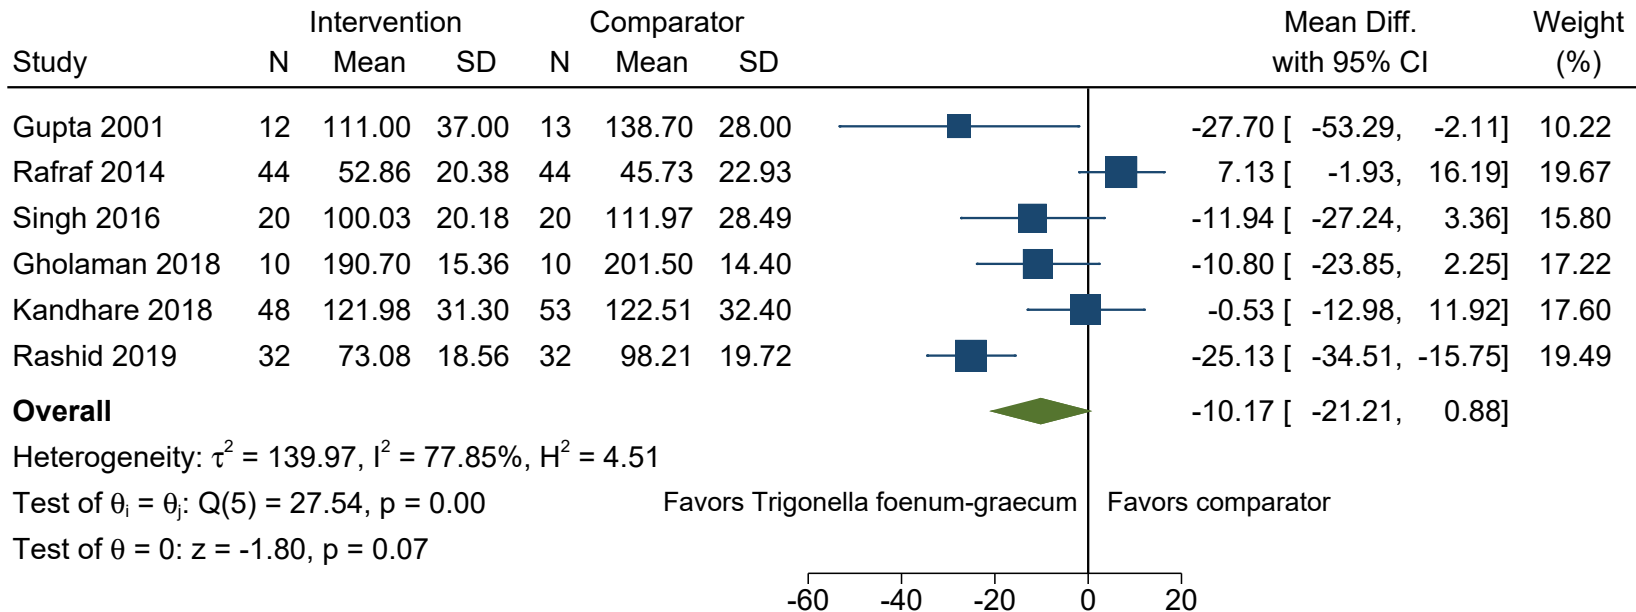

Supplement: Data_Sheet_1.zip [file Data_Sheet_1.zip]

# Trigonella foenum-graecum - LDL-C

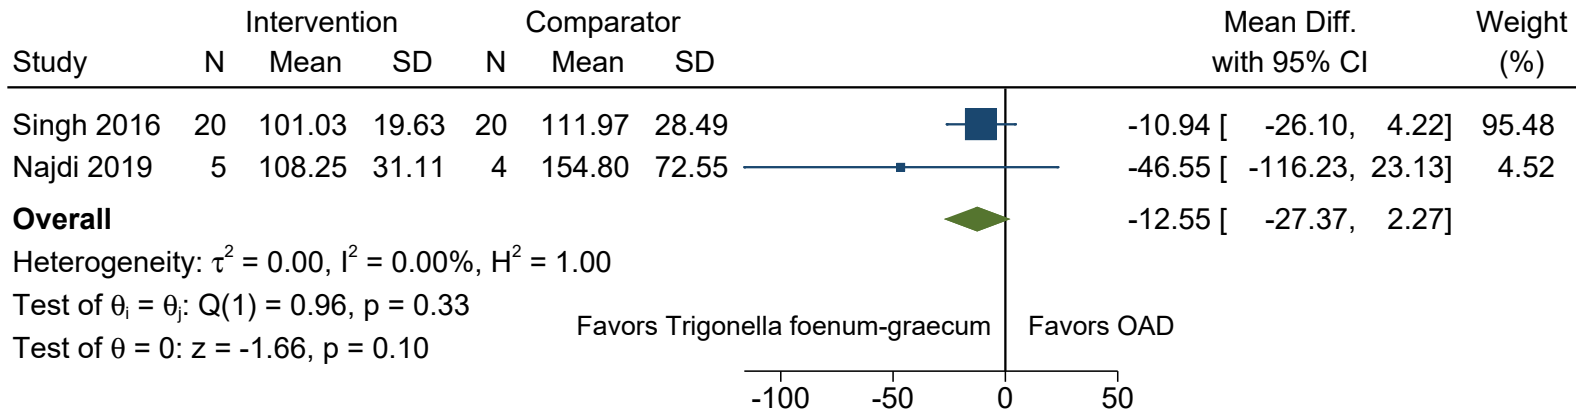

Random-effects REML model

Supplement: Data_Sheet_1.zip [file Data_Sheet_1.zip]

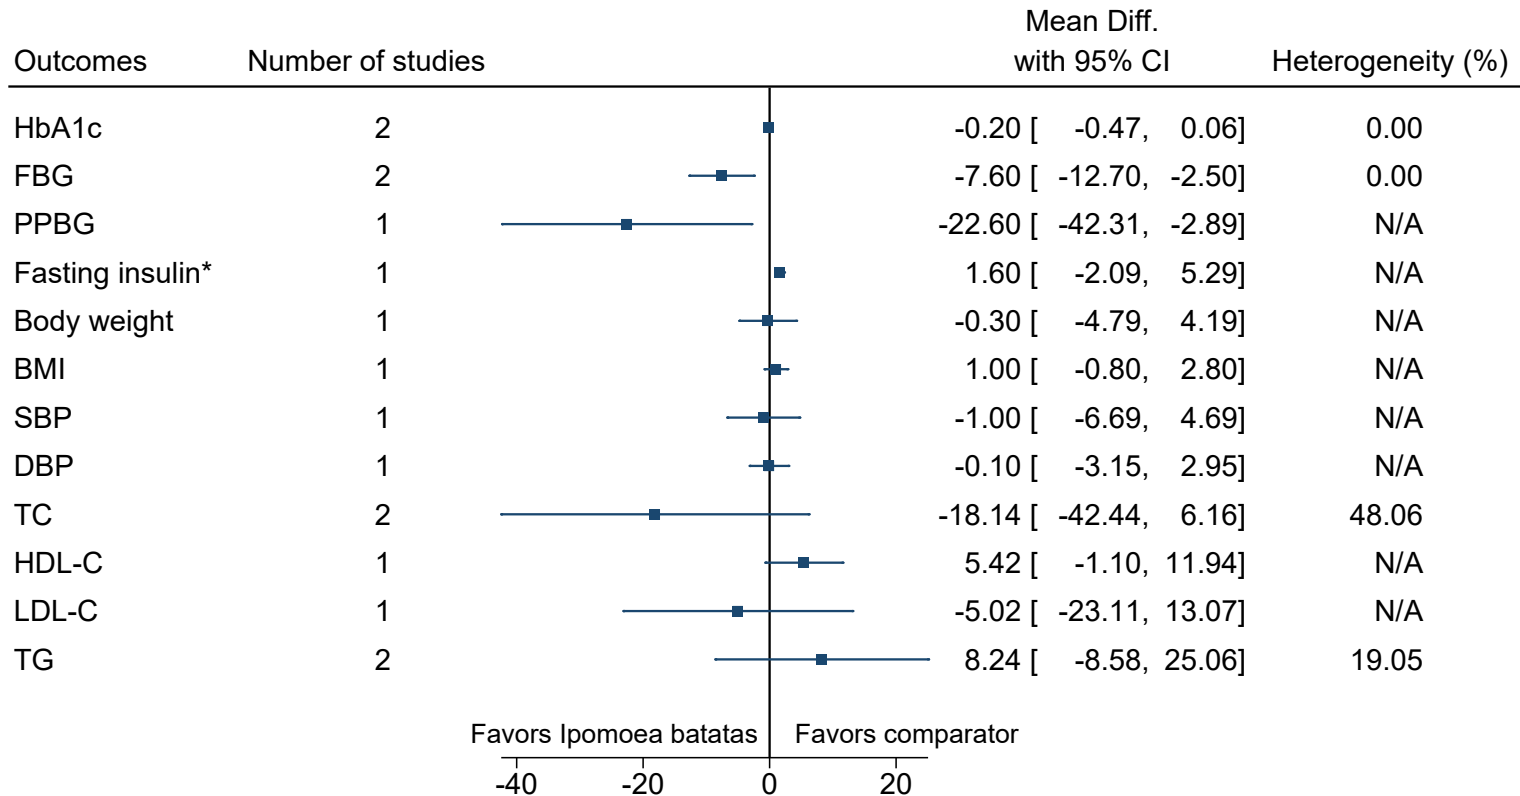

\*Favors intervention/comparator as insulin sensitizer

Supplement: Data_Sheet_1.zip [file Data_Sheet_1.zip]

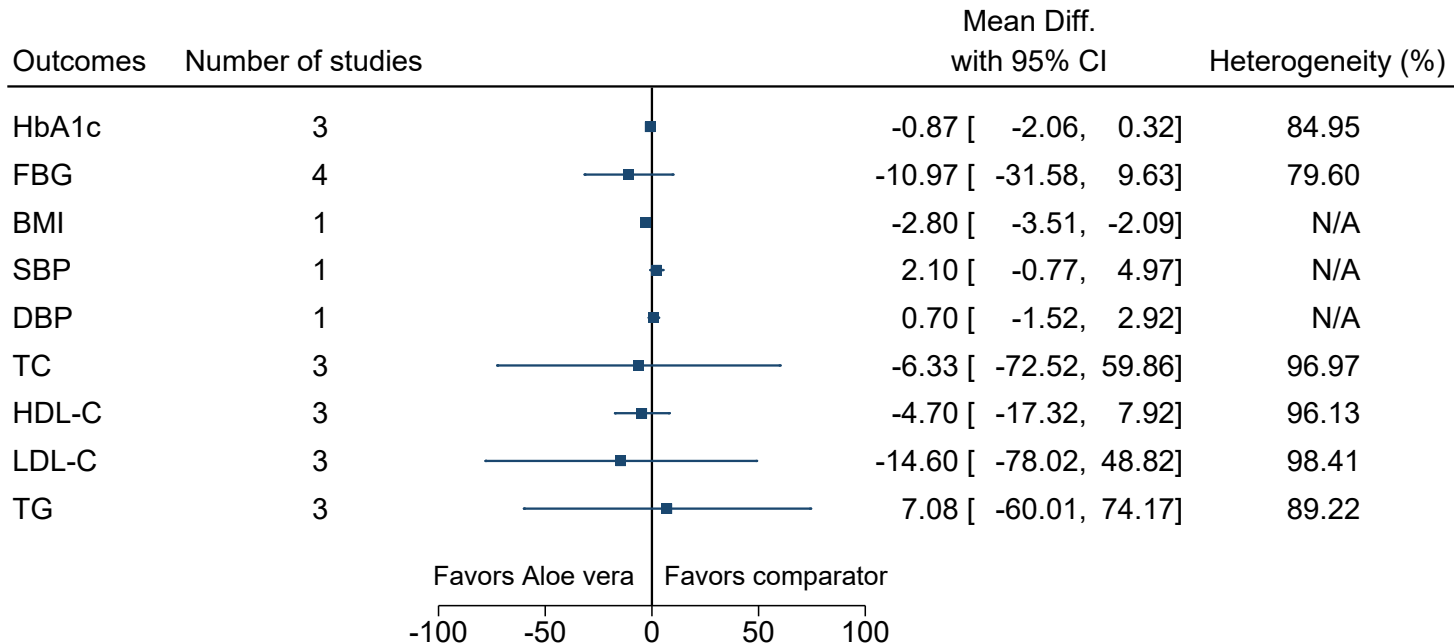

Supplement: Data_Sheet_1.zip [file Data_Sheet_1.zip]

# Cinnamomum aromaticum - SBP

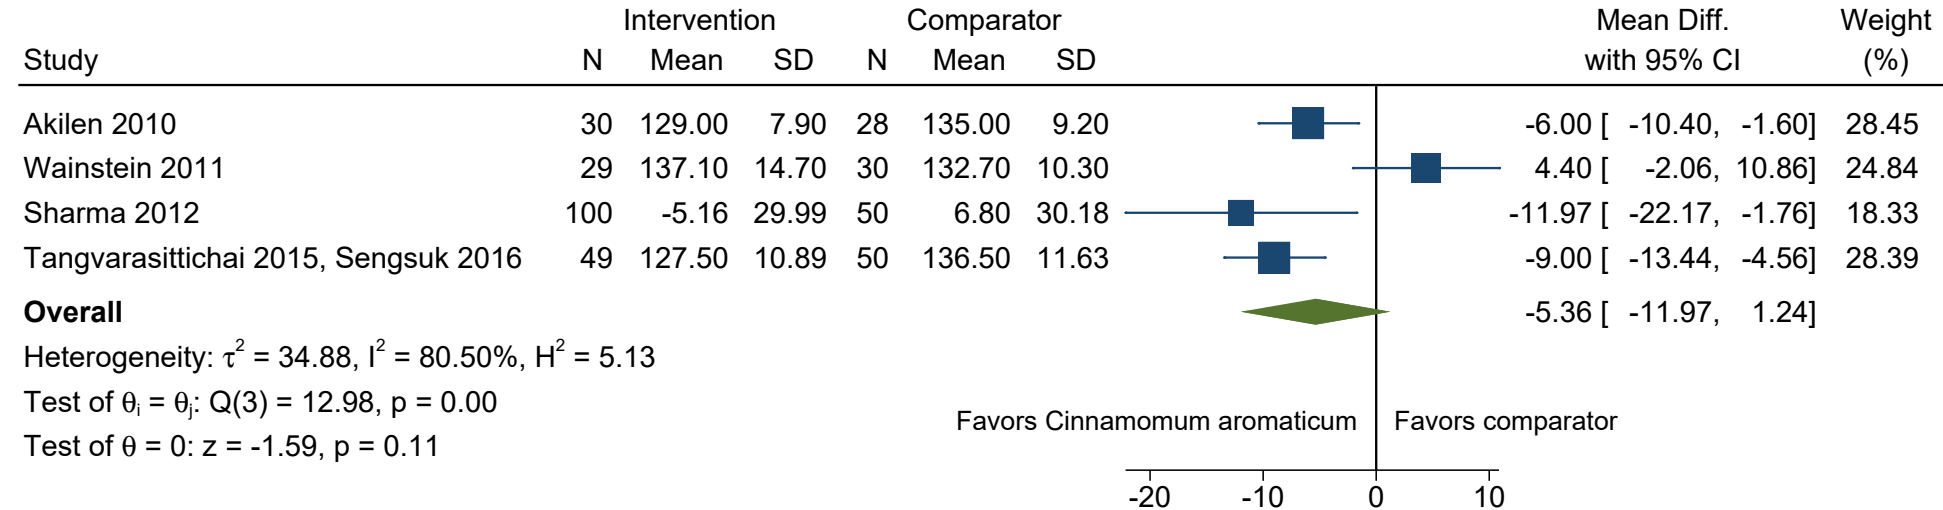

Random-effects REML model

Supplement: Data_Sheet_1.zip [file Data_Sheet_1.zip]

# Juglans regia - SBP

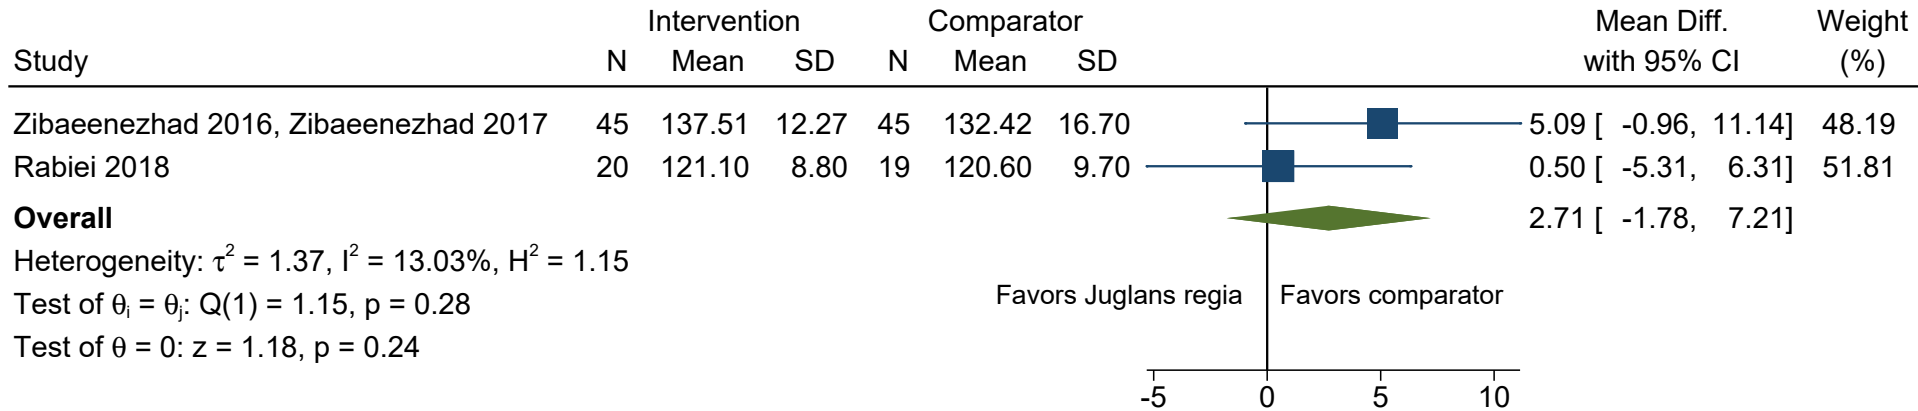

Random-effects REML model

Supplement: Data_Sheet_1.zip [file Data_Sheet_1.zip]

## Crocus sativus - TG

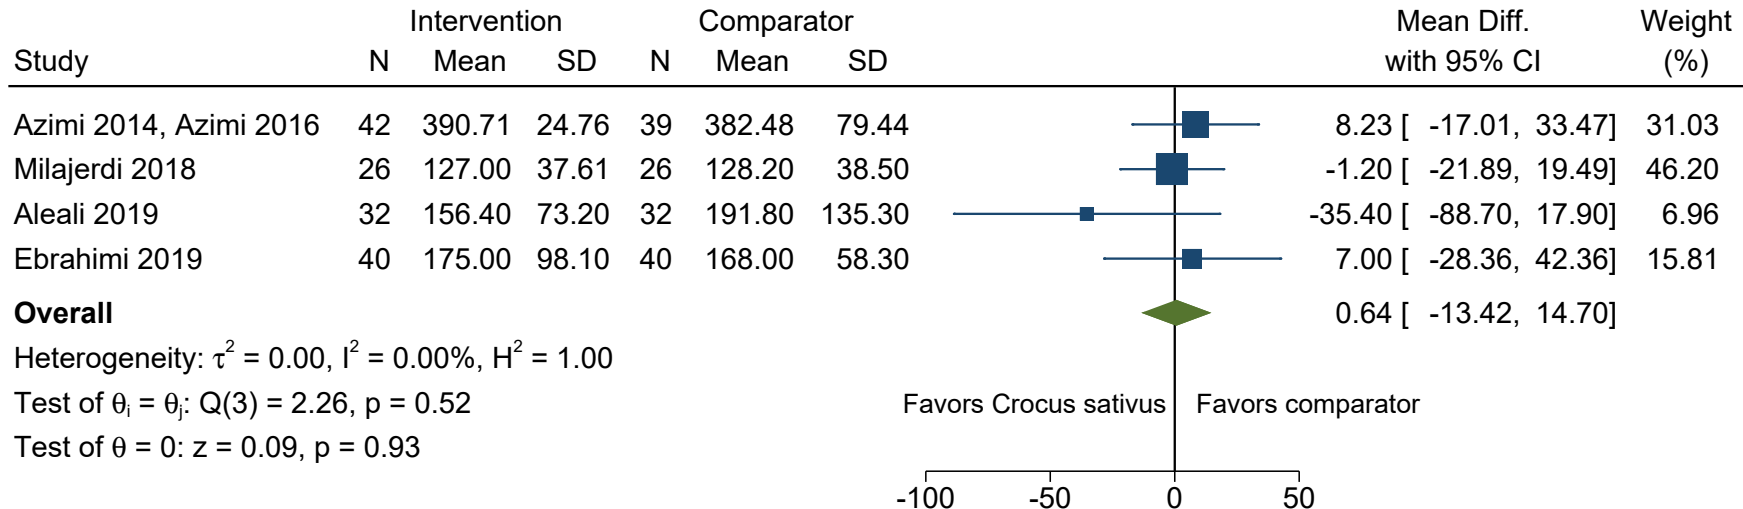

Random-effects REML model

Supplement: Data_Sheet_1.zip [file Data_Sheet_1.zip]

# Azadirachta indica - TC

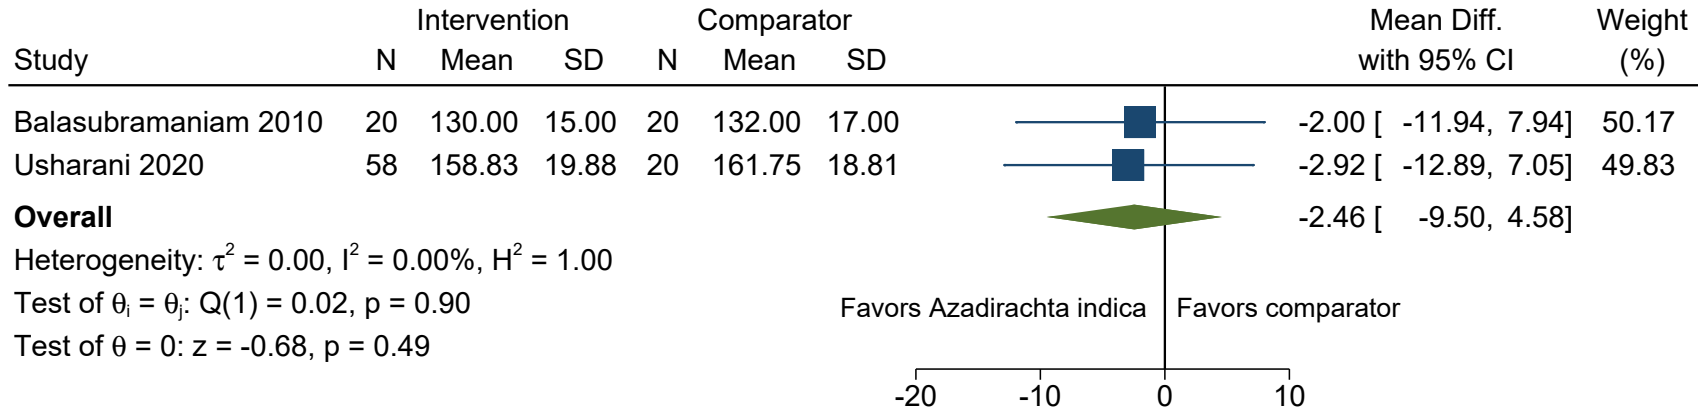

Random-effects REML model

Supplement: Data_Sheet_1.zip [file Data_Sheet_1.zip]

# Nigella sativa - TC

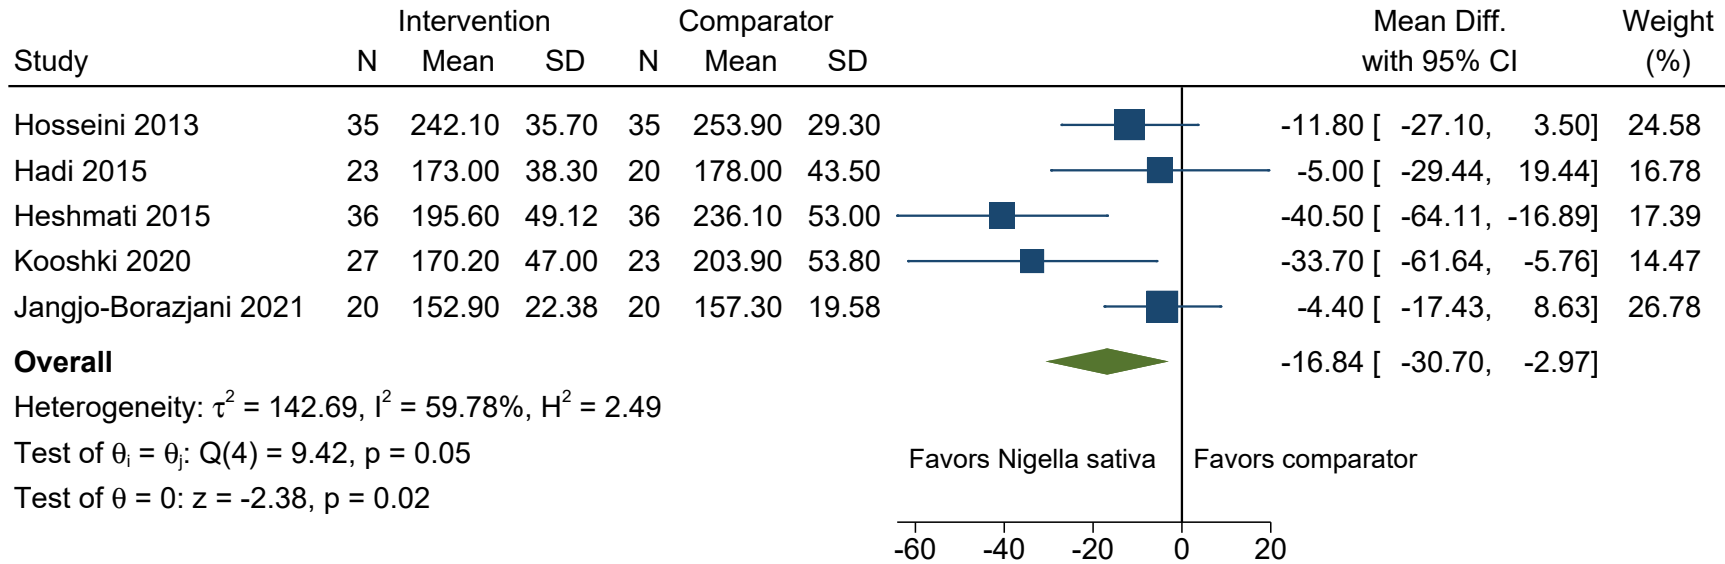

Supplement: Data_Sheet_1.zip [file Data_Sheet_1.zip]

# Zingiber officinale - LDL-C

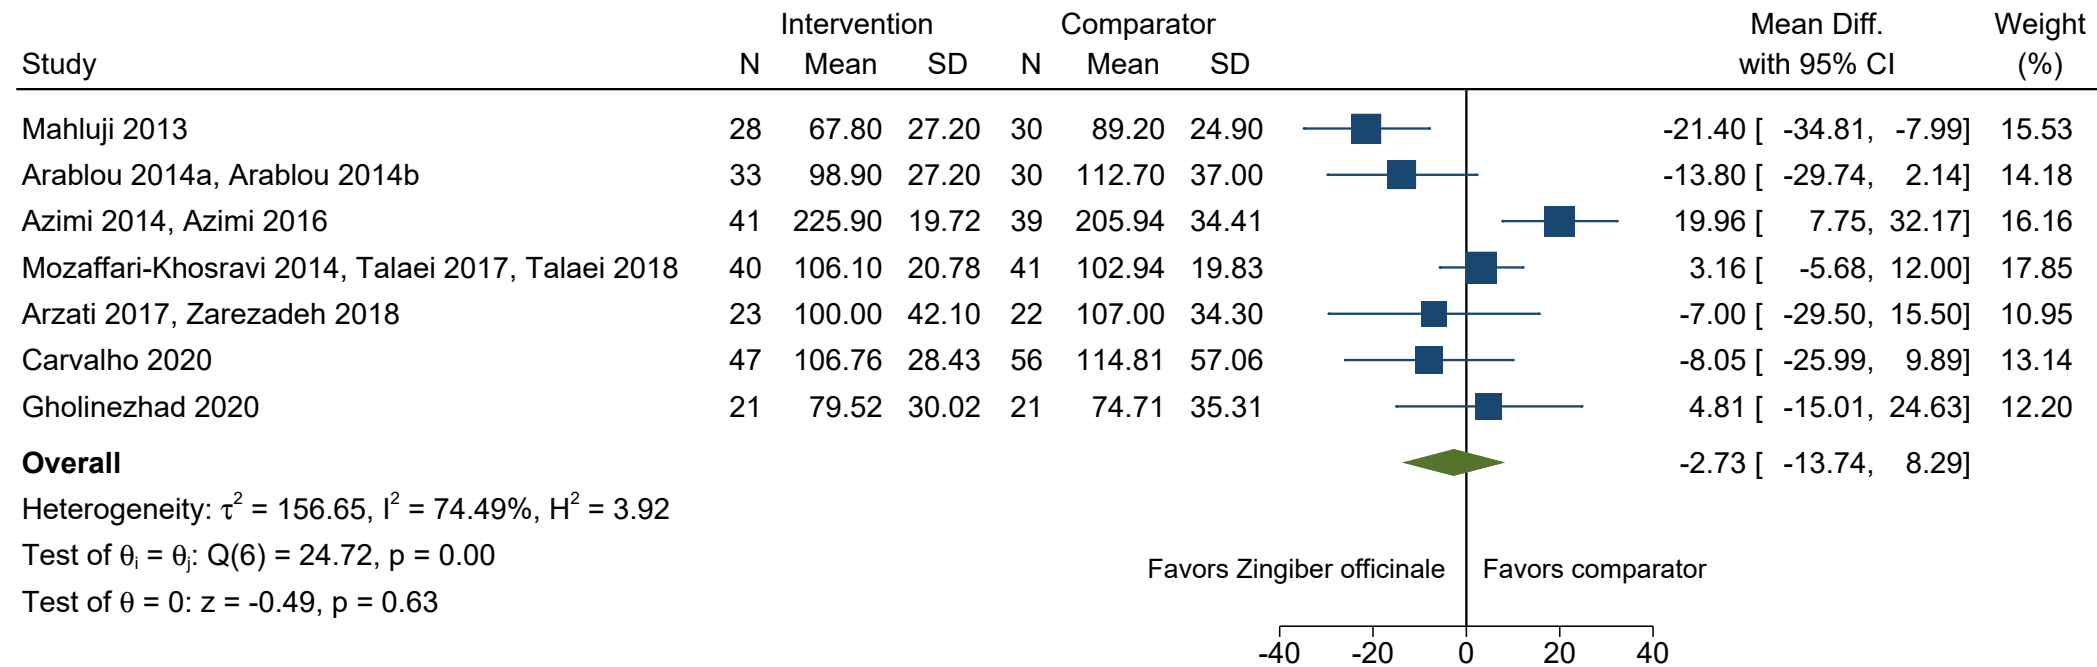

Supplement: Data_Sheet_1.zip [file Data_Sheet_1.zip]

# Syzygium cumini - HDL-C

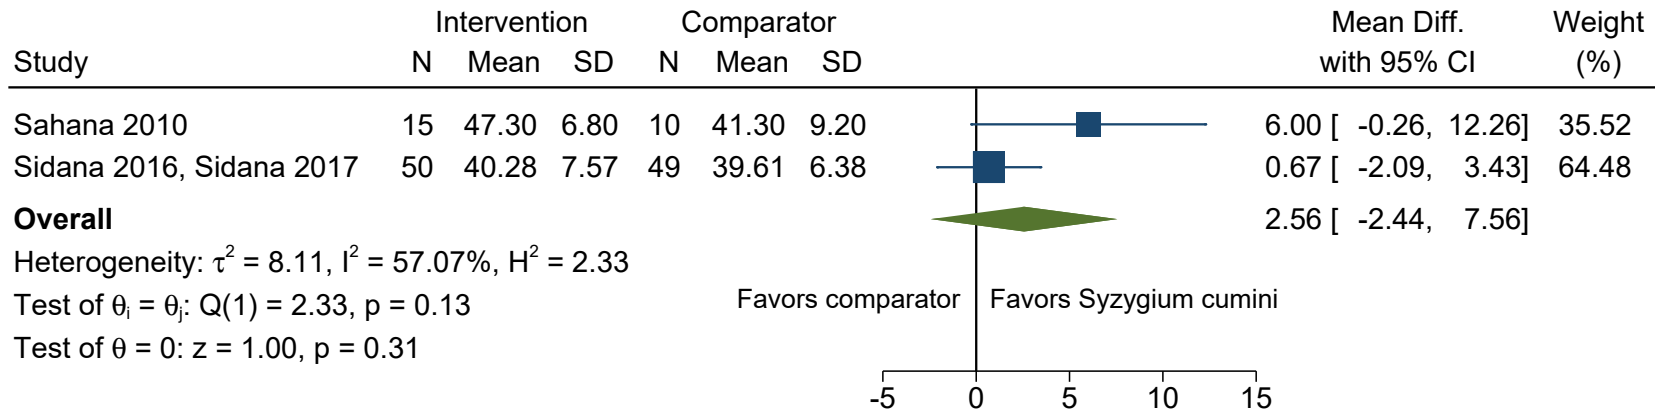

Random-effects REML model

Supplement: Data_Sheet_1.zip [file Data_Sheet_1.zip]

# Momordica charantia - HDL-C

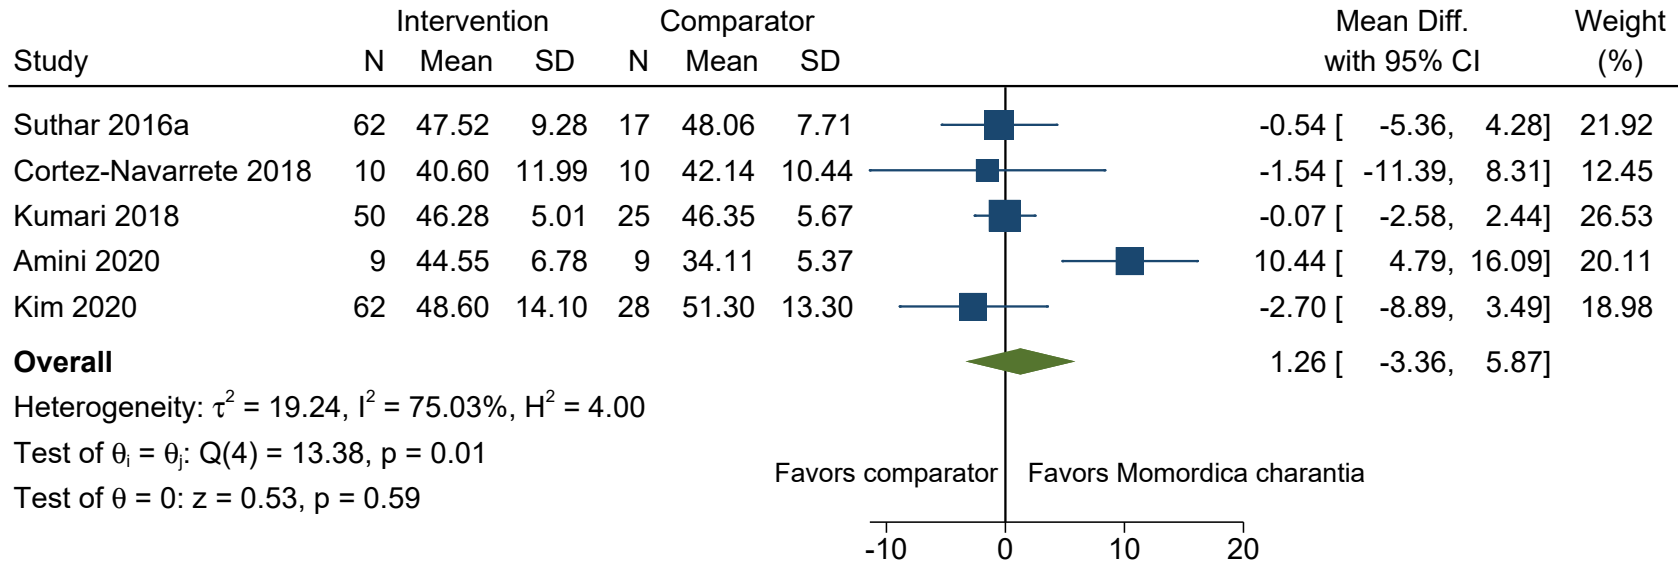

Supplement: Data_Sheet_1.zip [file Data_Sheet_1.zip]

## Boswellia serrata - LDL-C

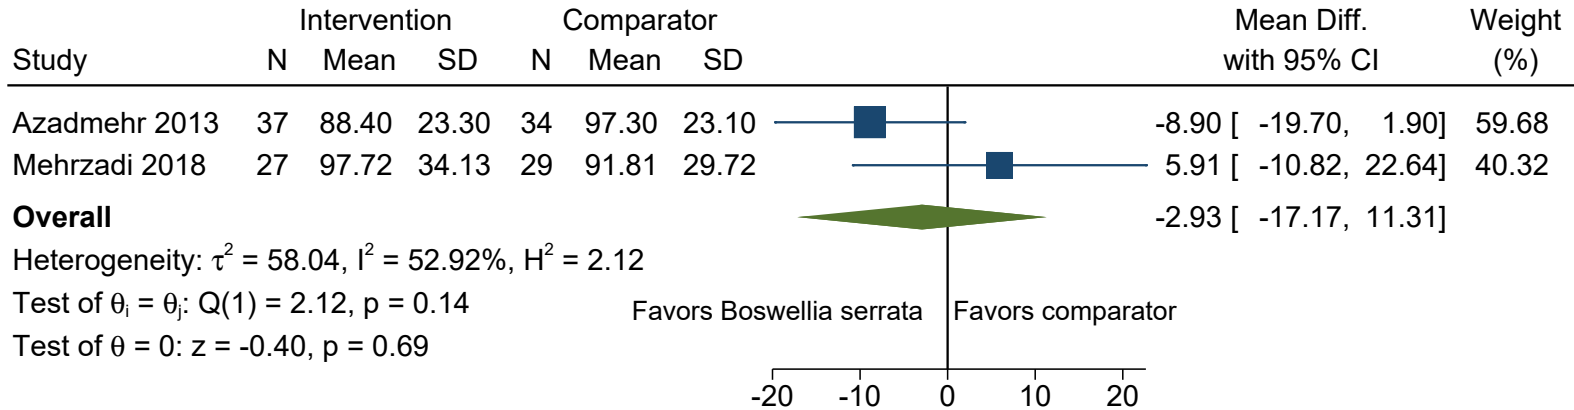

Random-effects REML model

Supplement: Data_Sheet_1.zip [file Data_Sheet_1.zip]

# Crocus sativus - Insulin resistance

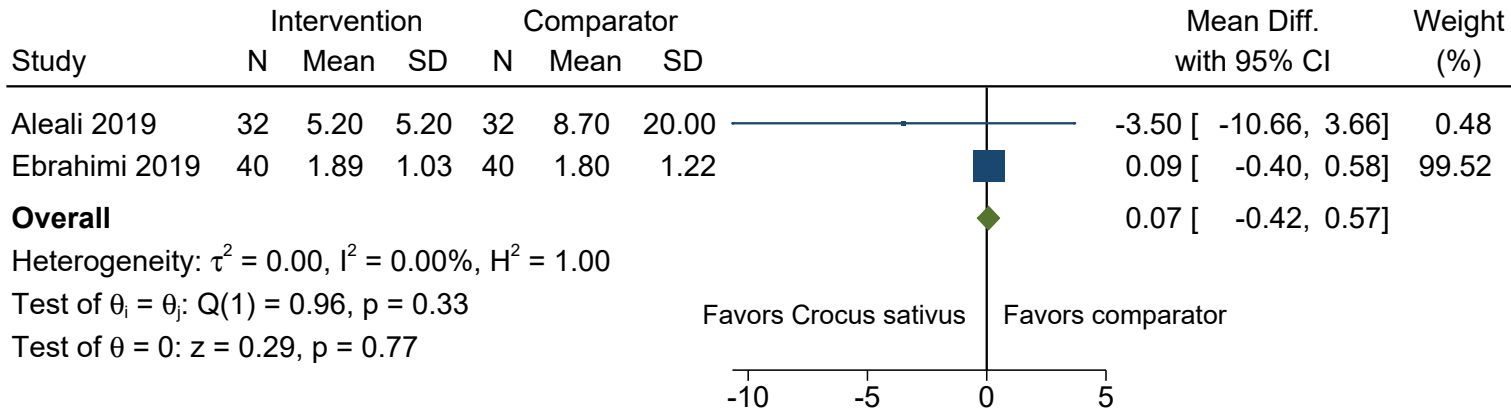

Random-effects REML model

Supplement: Data_Sheet_1.zip [file Data_Sheet_1.zip]

# Juglans regia - FBG

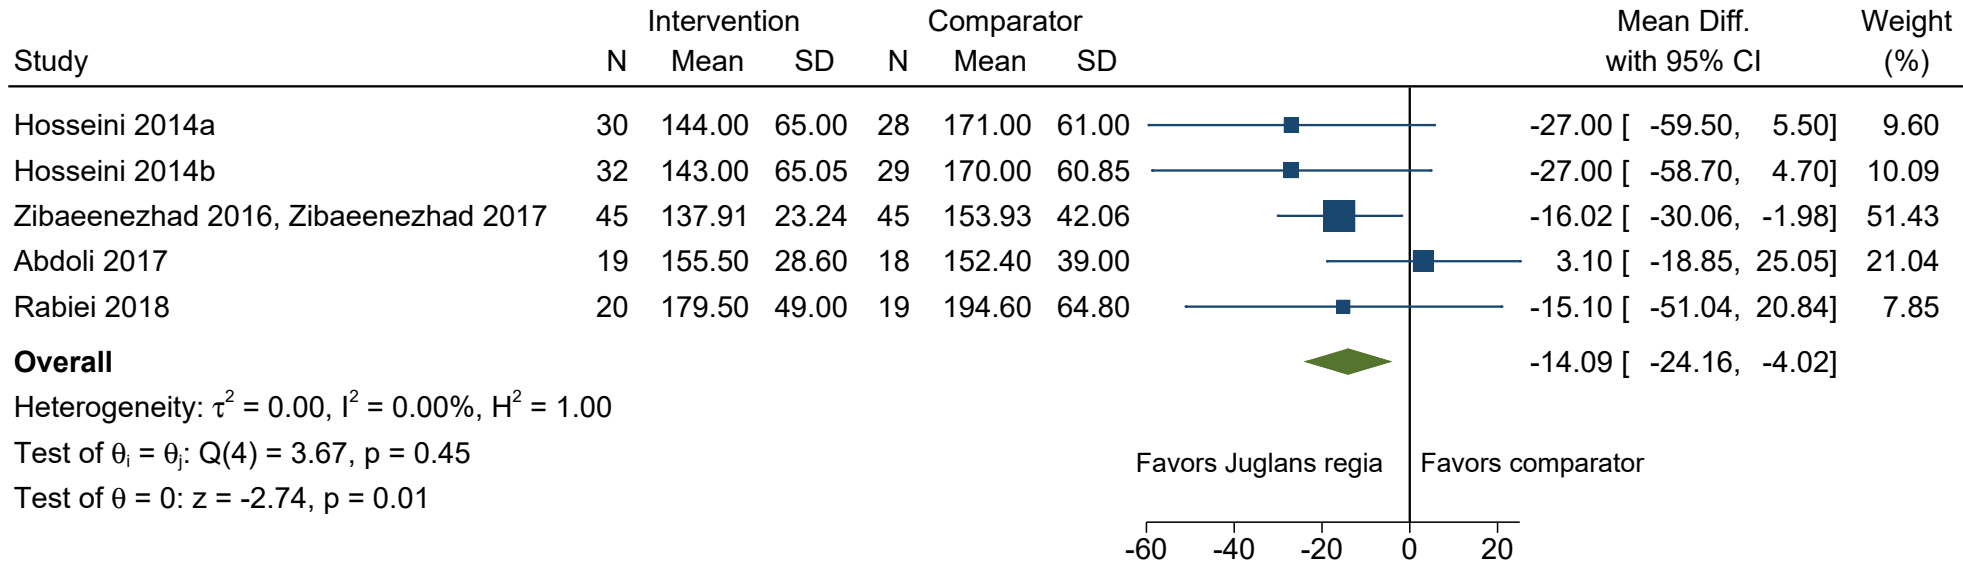

Supplement: Data_Sheet_1.zip [file Data_Sheet_1.zip]

# Momordica charantia - LDL-C

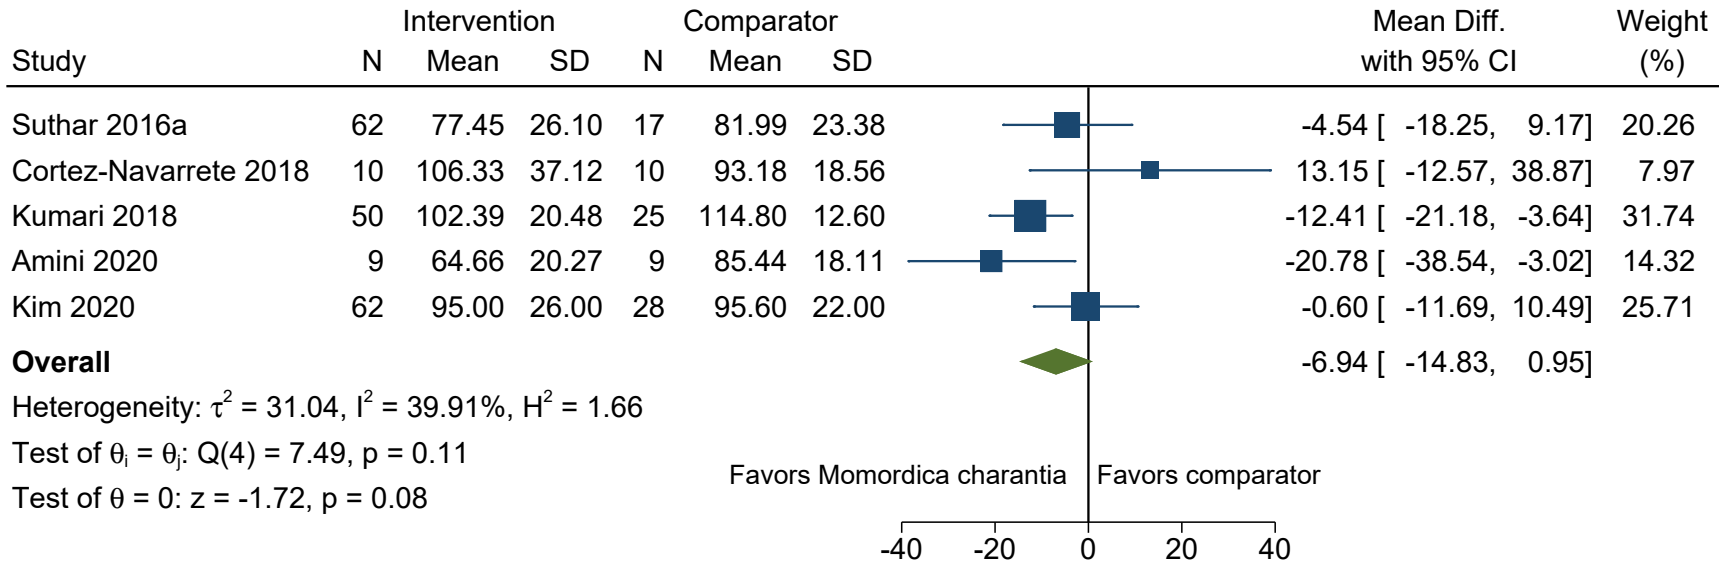

Supplement: Data_Sheet_1.zip [file Data_Sheet_1.zip]

# Elettaria cardamomum - LDL-C

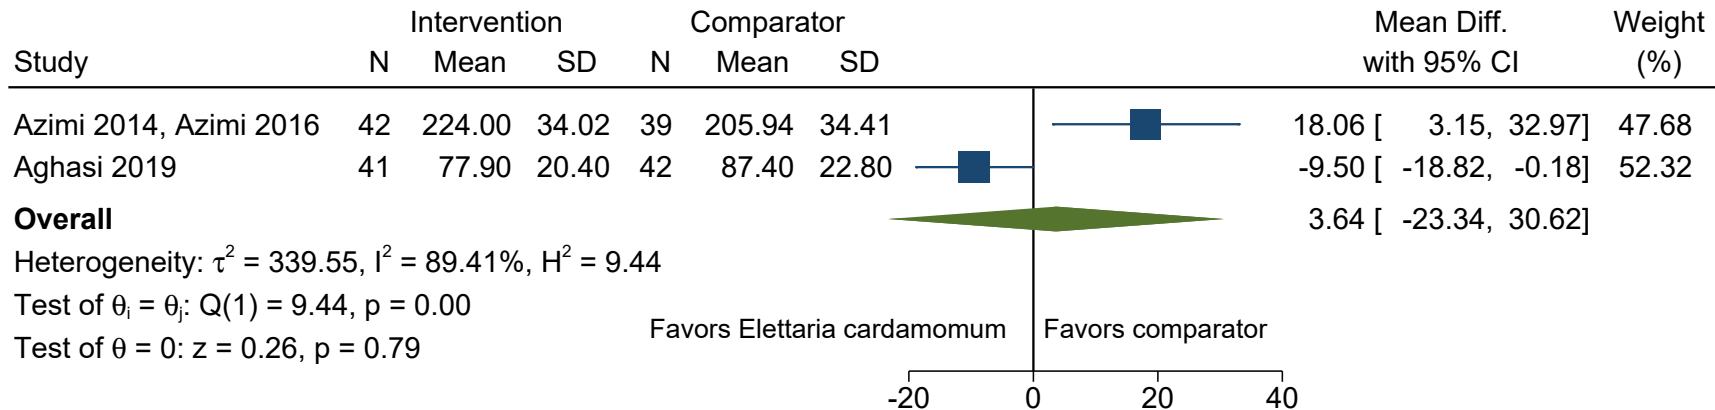

Random-effects REML model

Supplement: Data_Sheet_1.zip [file Data_Sheet_1.zip]

# Trigonella foenum-graecum - Body weight

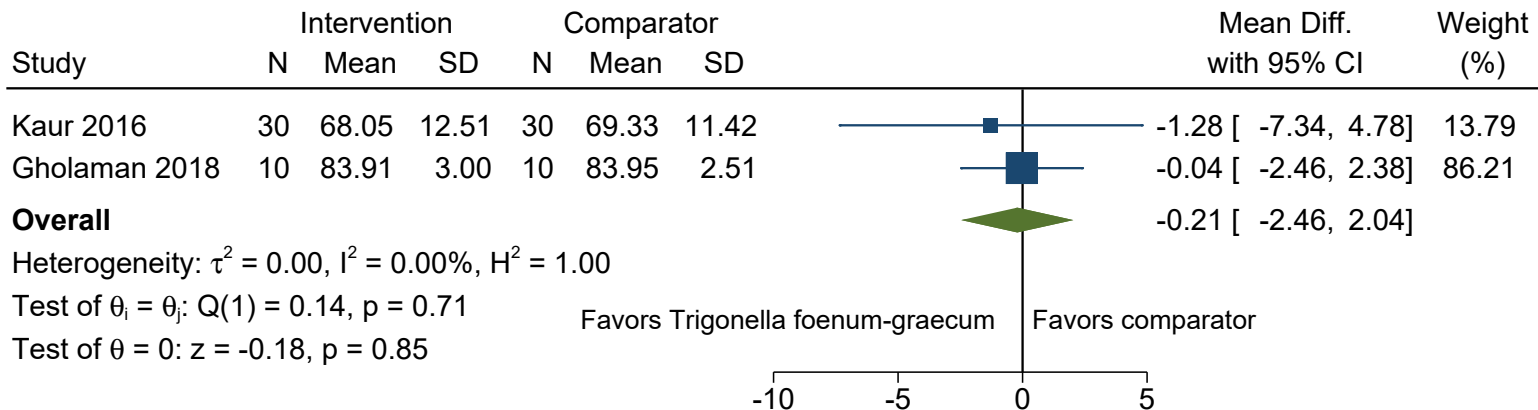

Random-effects REML model

Supplement: Data_Sheet_1.zip [file Data_Sheet_1.zip]

# Trigonella foenum-graecum - FBG - sensitivity analysis

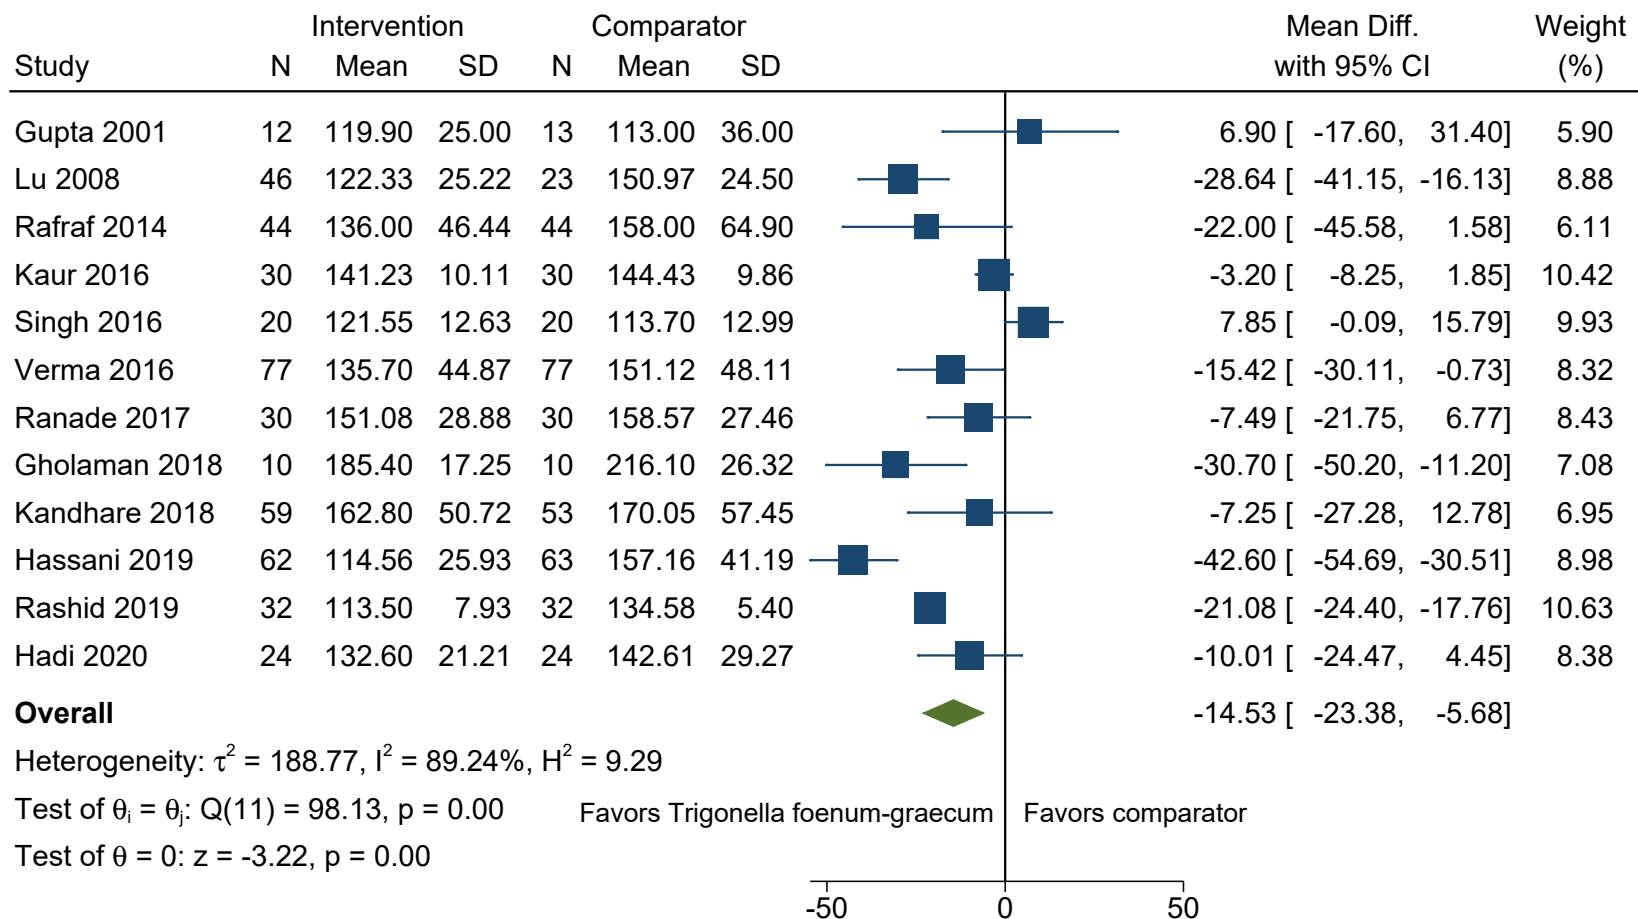

Supplement: Data_Sheet_1.zip [file Data_Sheet_1.zip]

# Juglans regia - HDL-C

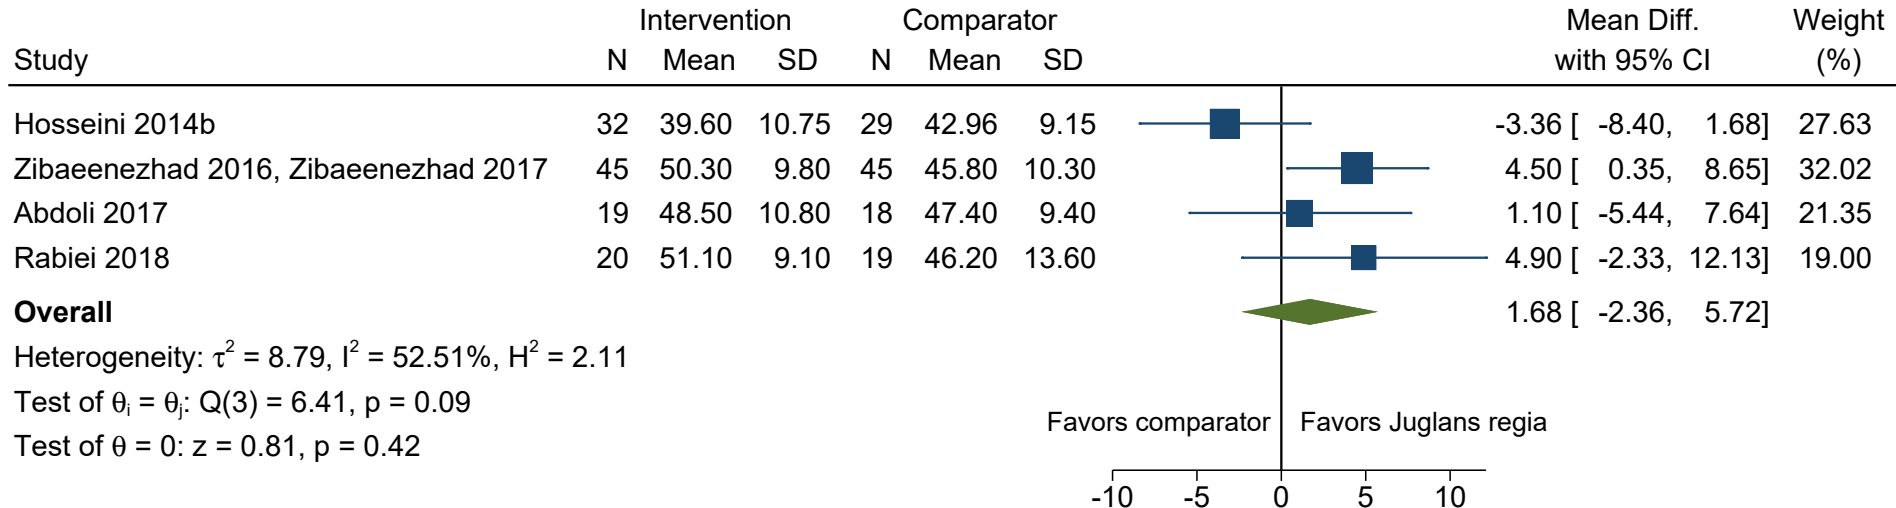

Random-effects REML model

Supplement: Data_Sheet_1.zip [file Data_Sheet_1.zip]

# Curcuma longa - BMI

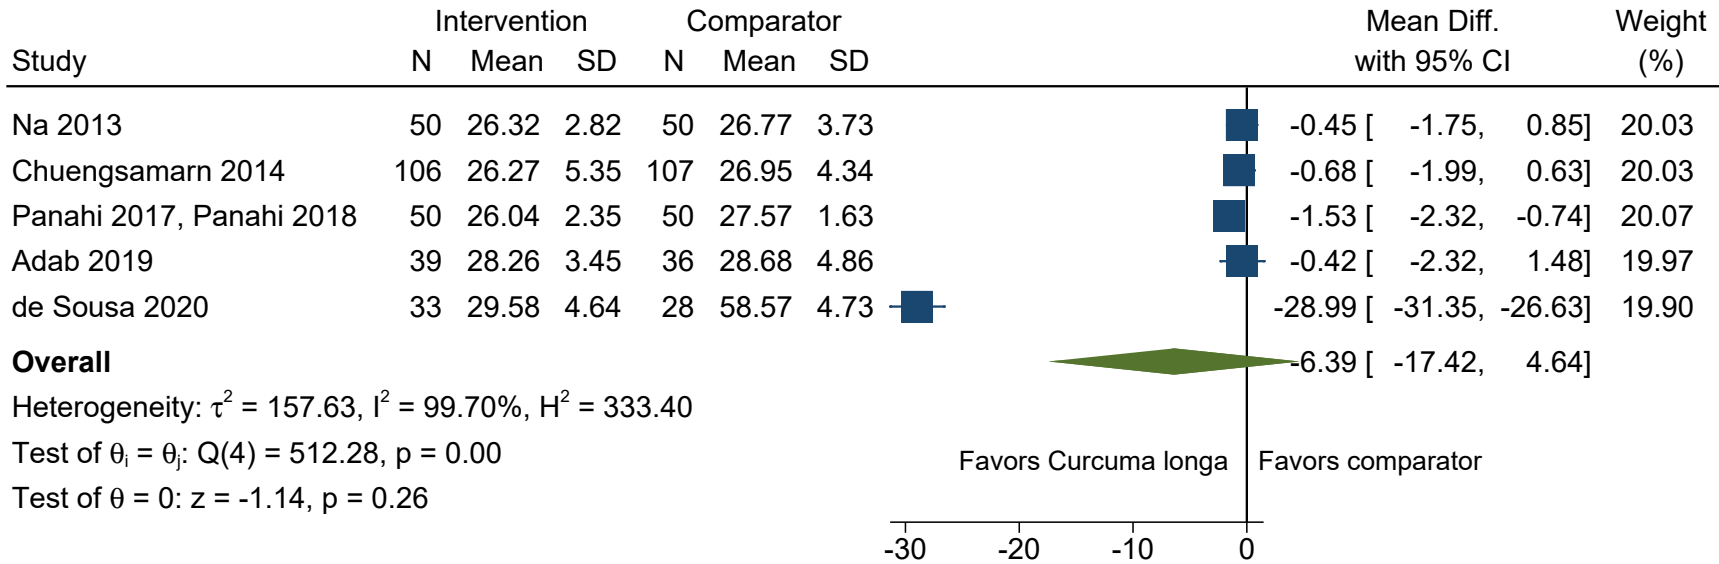

Random-effects REML model

Supplement: Data_Sheet_1.zip [file Data_Sheet_1.zip]

# Urtica dioica - FBG

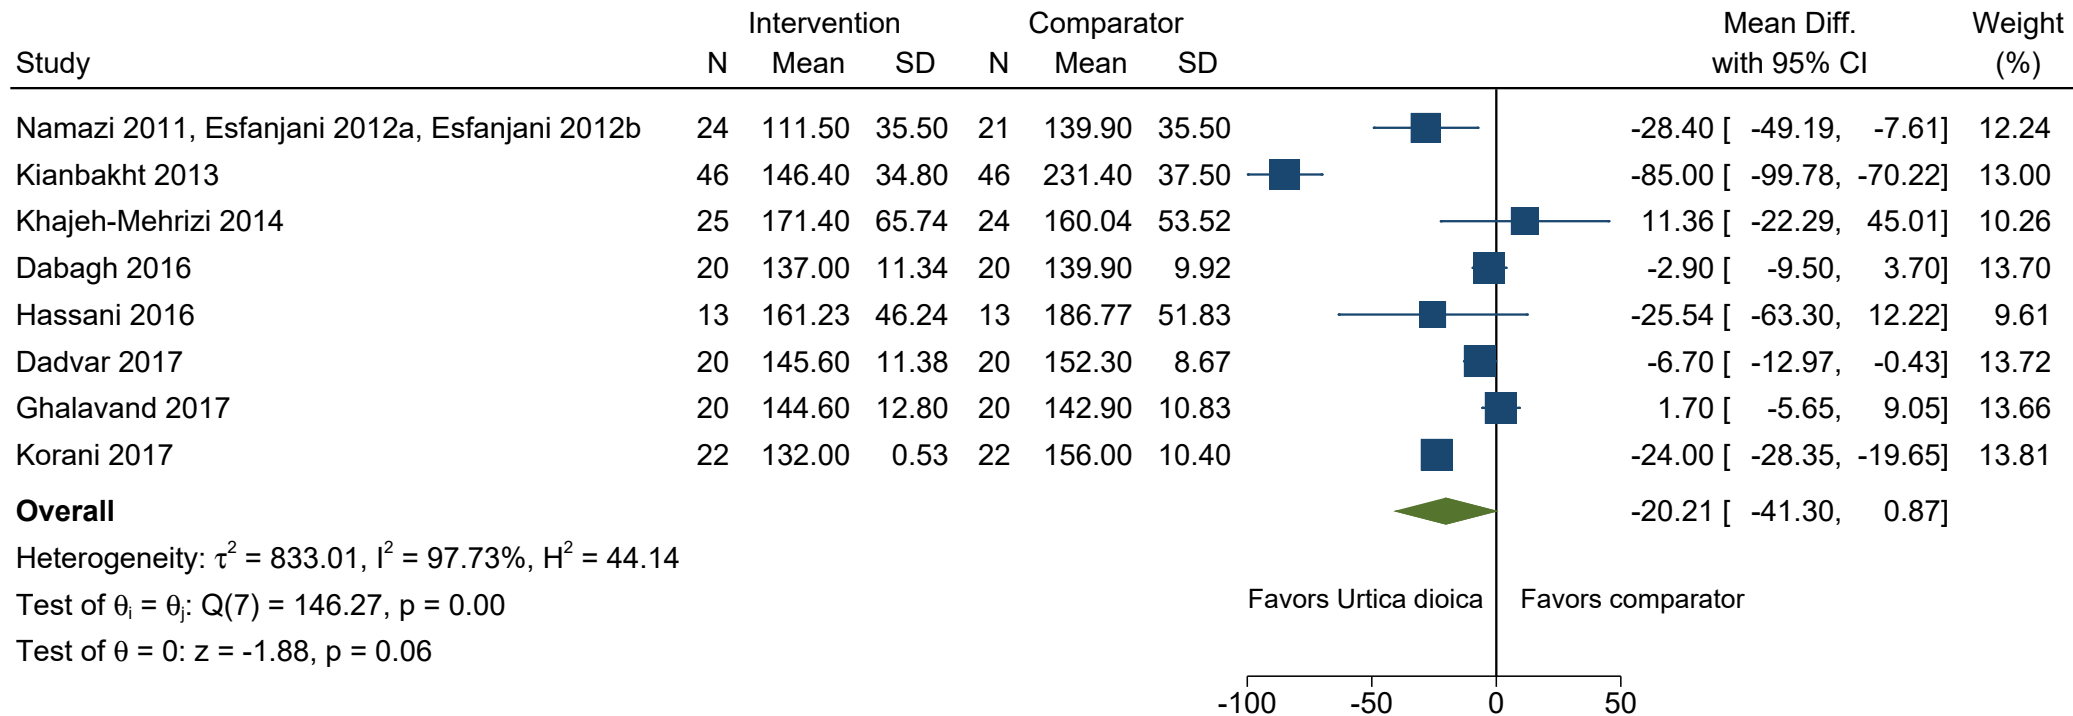

Supplement: Data_Sheet_1.zip [file Data_Sheet_1.zip]

# Urtica dioica - BMI

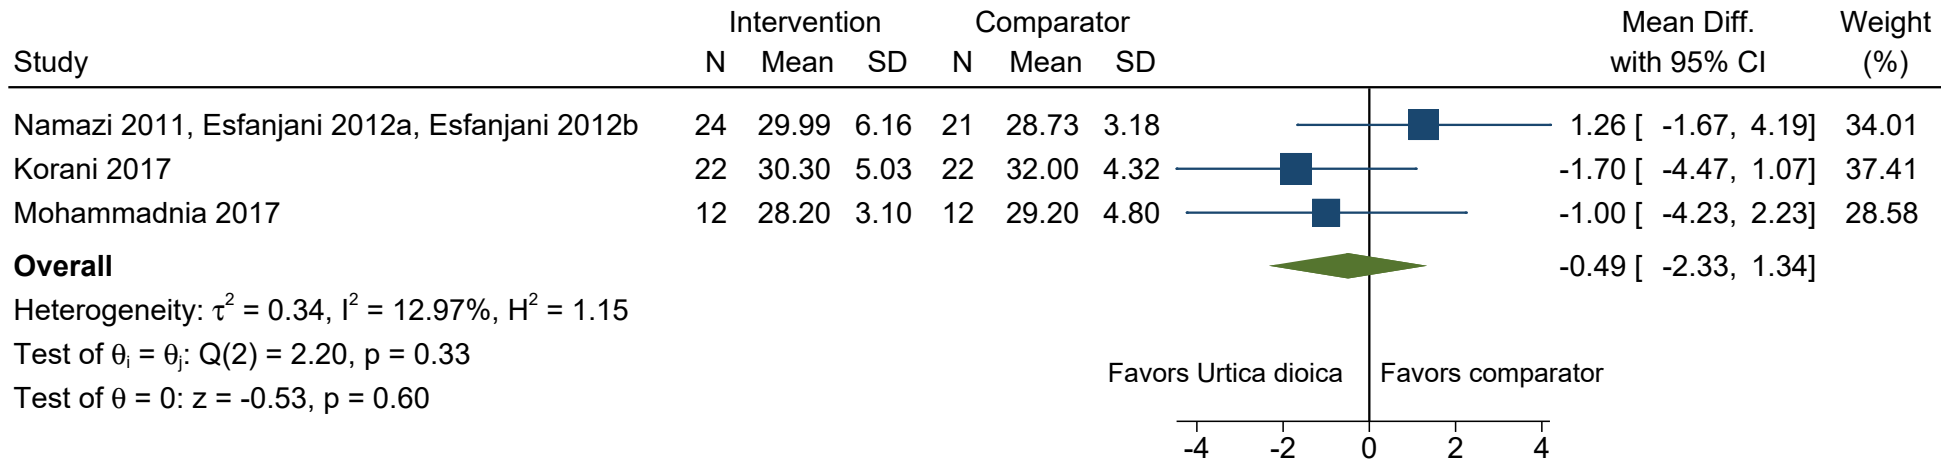

Random-effects REML model

Supplement: Data_Sheet_1.zip [file Data_Sheet_1.zip]

# Trigonella foenum-graecum - PPBG

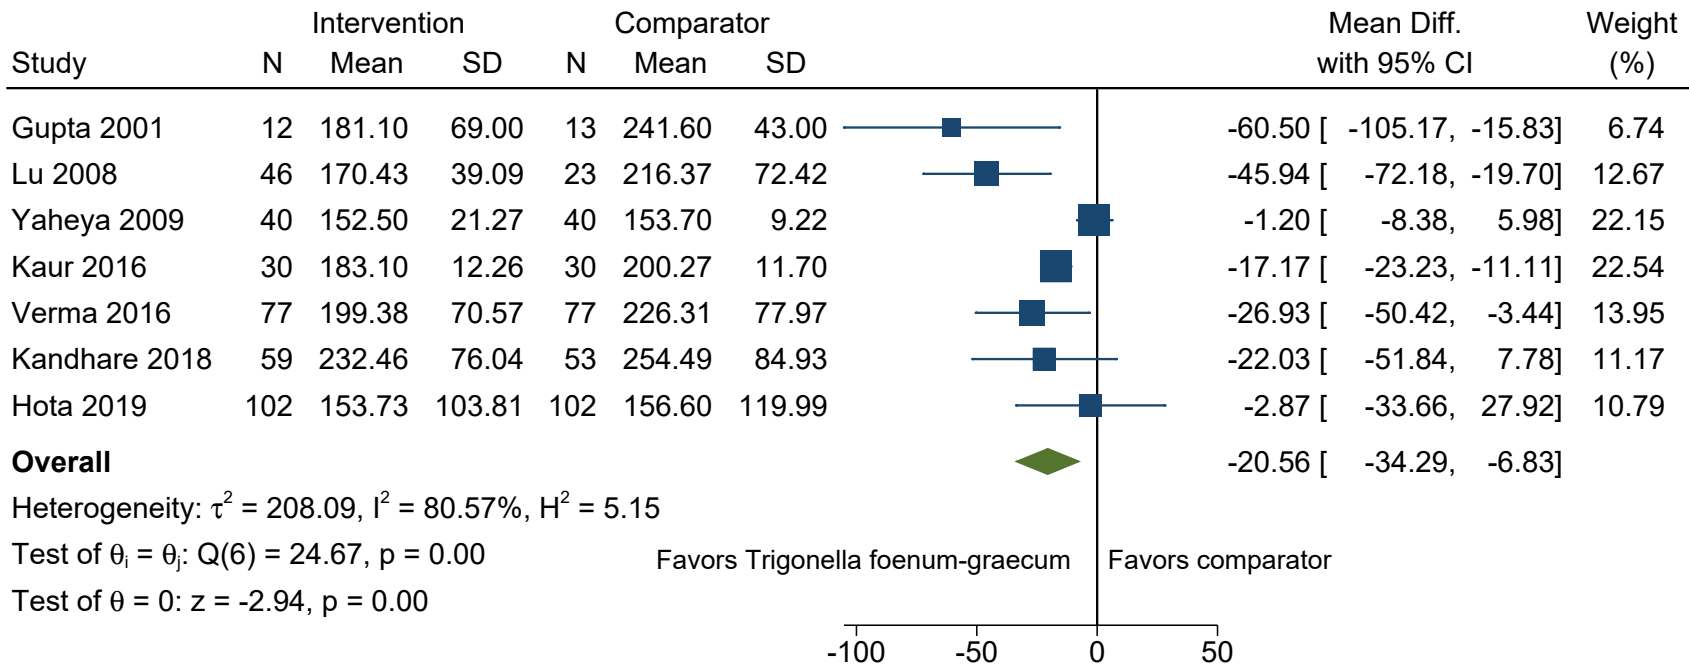

Supplement: Data_Sheet_1.zip [file Data_Sheet_1.zip]

# Cinnamomum aromaticum - BMI

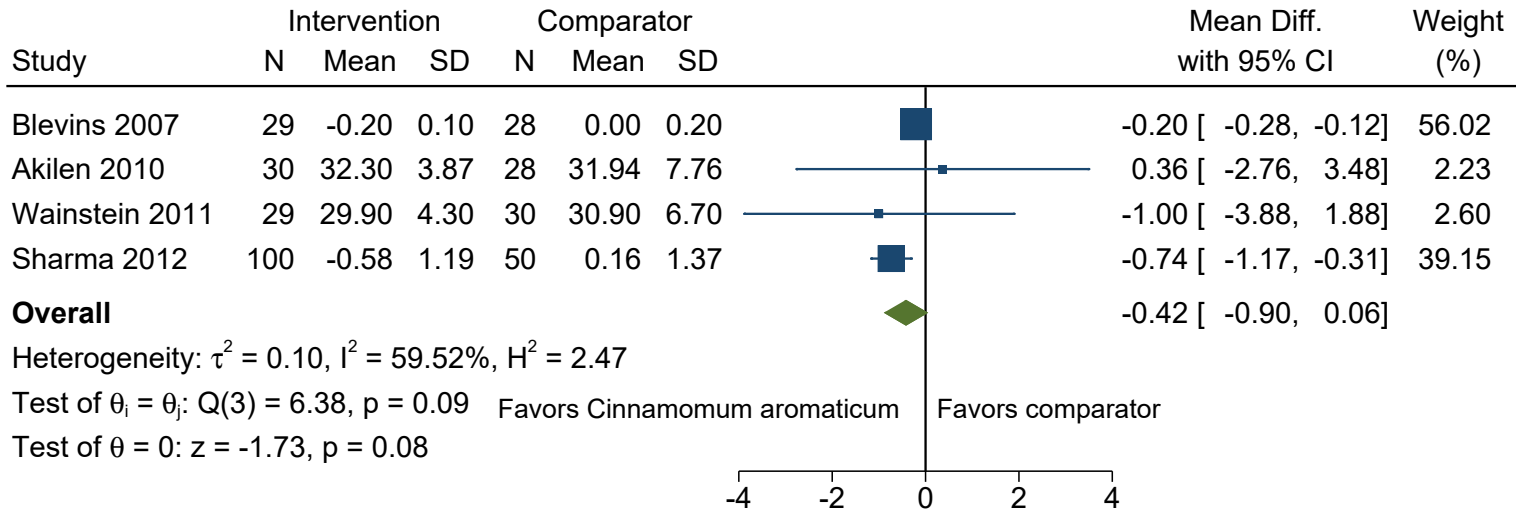

Random-effects REML model

Supplement: Data_Sheet_1.zip [file Data_Sheet_1.zip]

# Camellia sinensis - Body weight

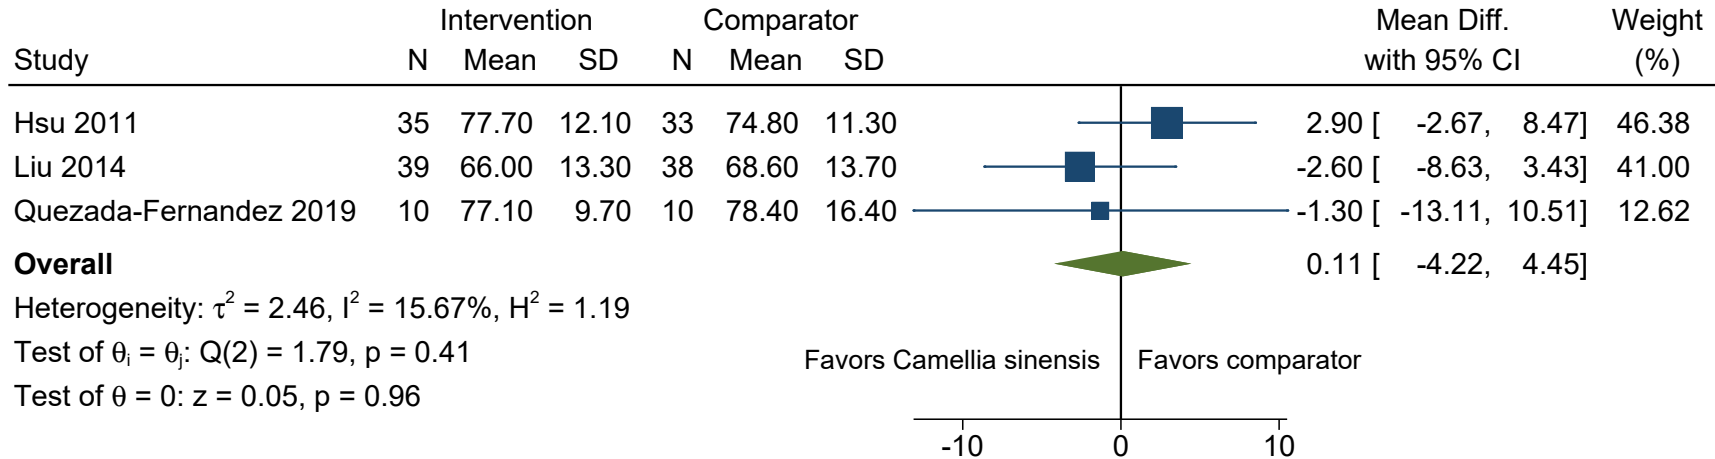

Random-effects REML model

Supplement: Data_Sheet_1.zip [file Data_Sheet_1.zip]

# Curcuma longa - TC

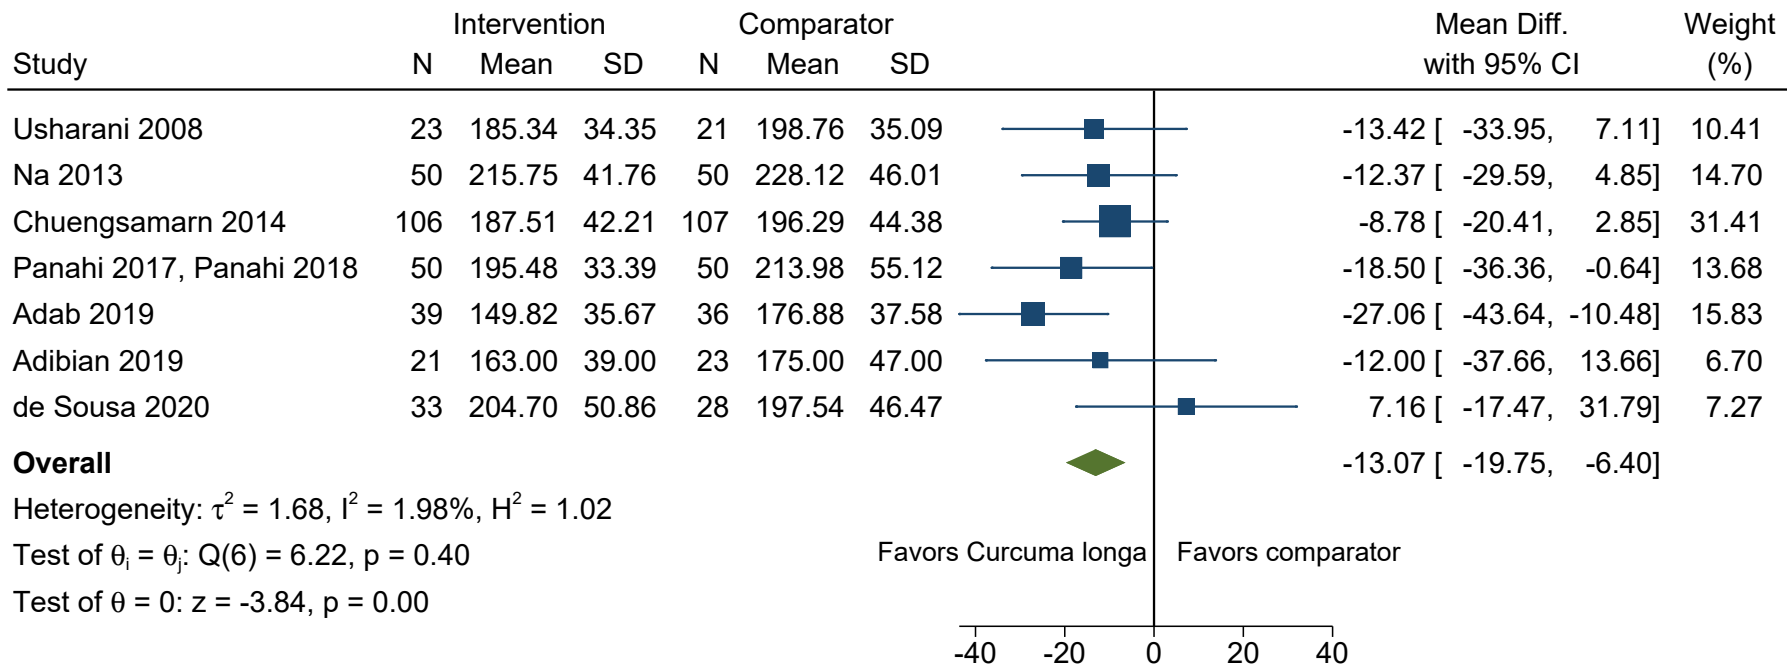

Supplement: Data_Sheet_1.zip [file Data_Sheet_1.zip]

# Zingiber officinale - HbA1c

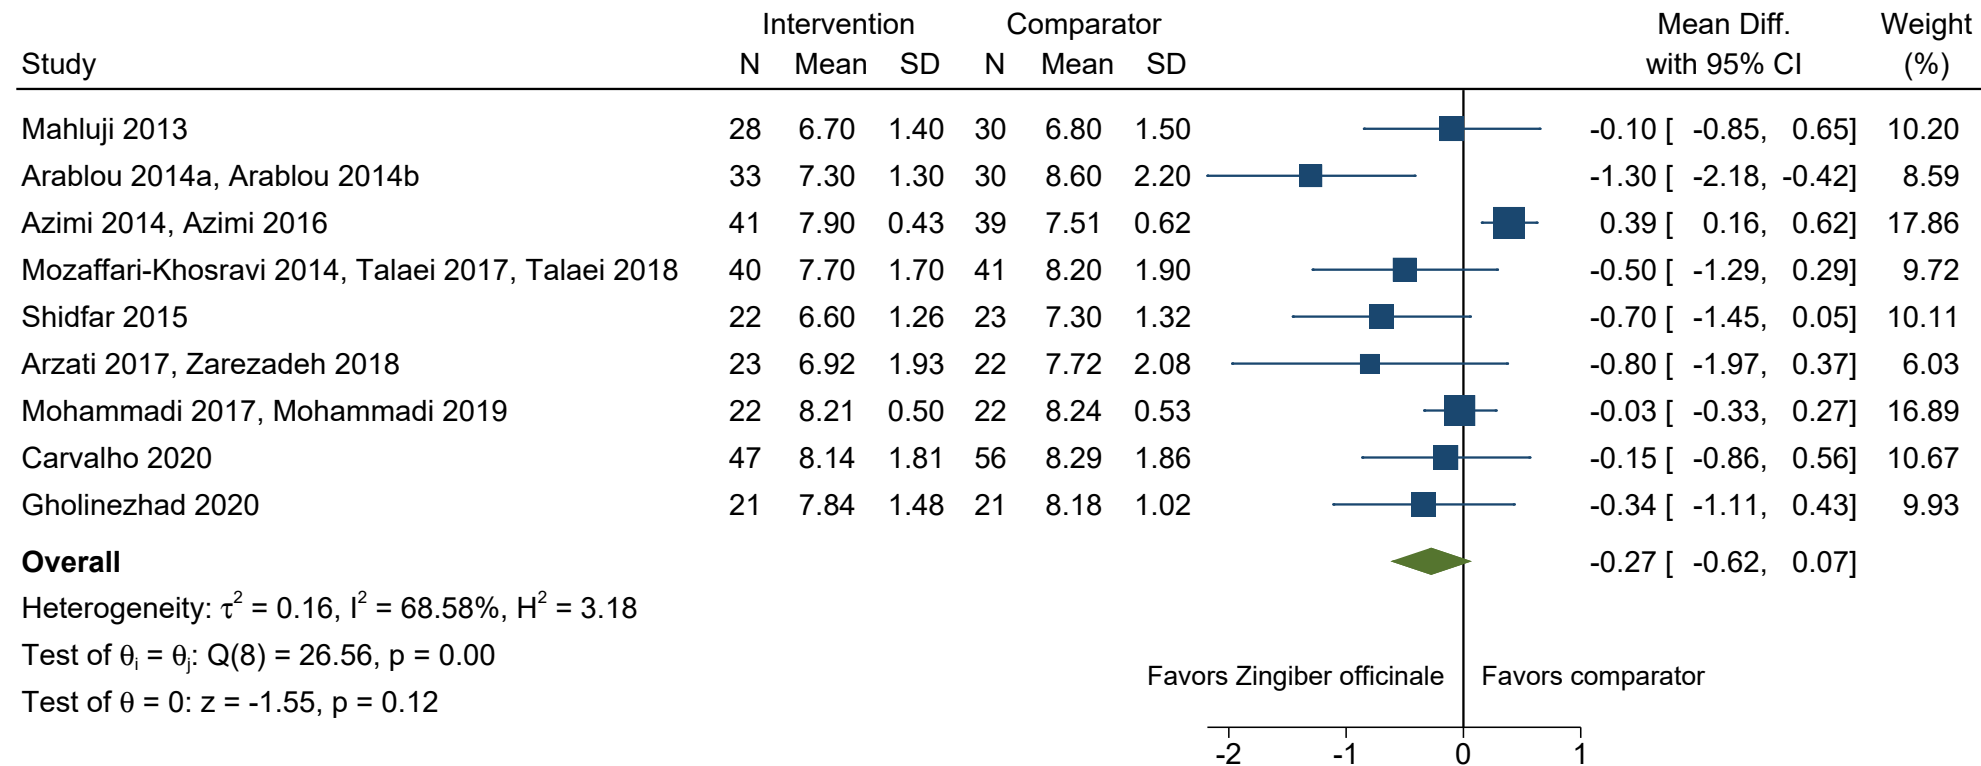

Supplement: Data_Sheet_1.zip [file Data_Sheet_1.zip]

# Urtica dioica - LDL-C

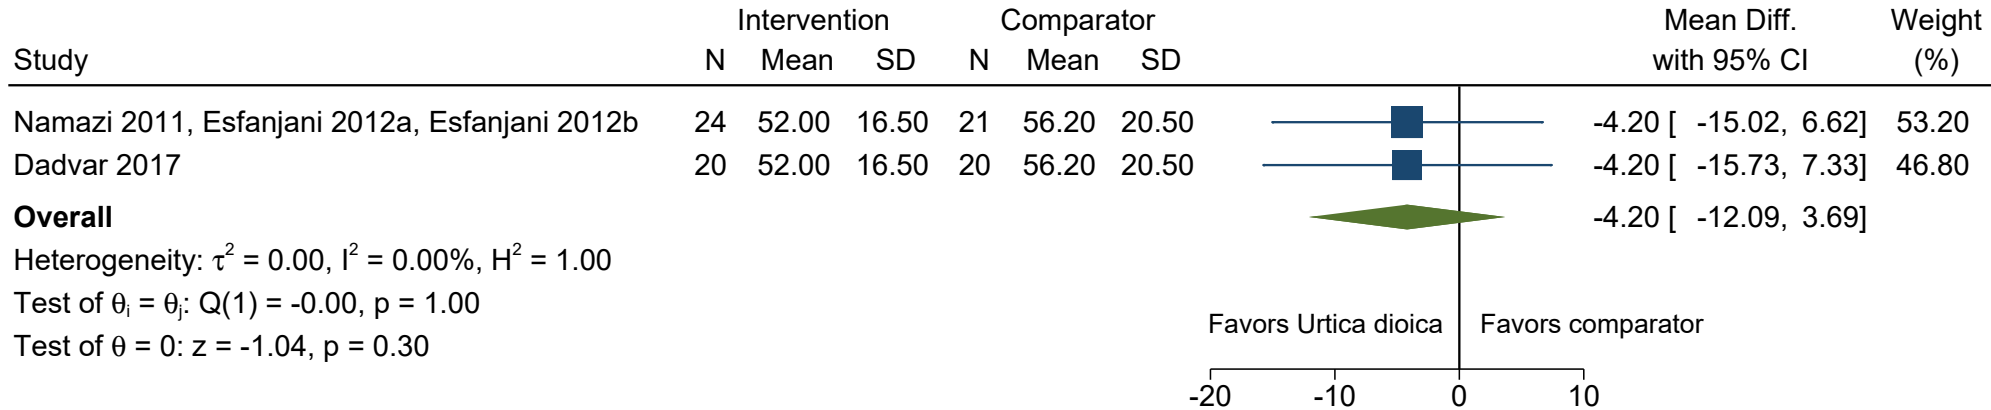

Random-effects REML model

Supplement: Data_Sheet_1.zip [file Data_Sheet_1.zip]

# Portulaca oleracea - LDL-C

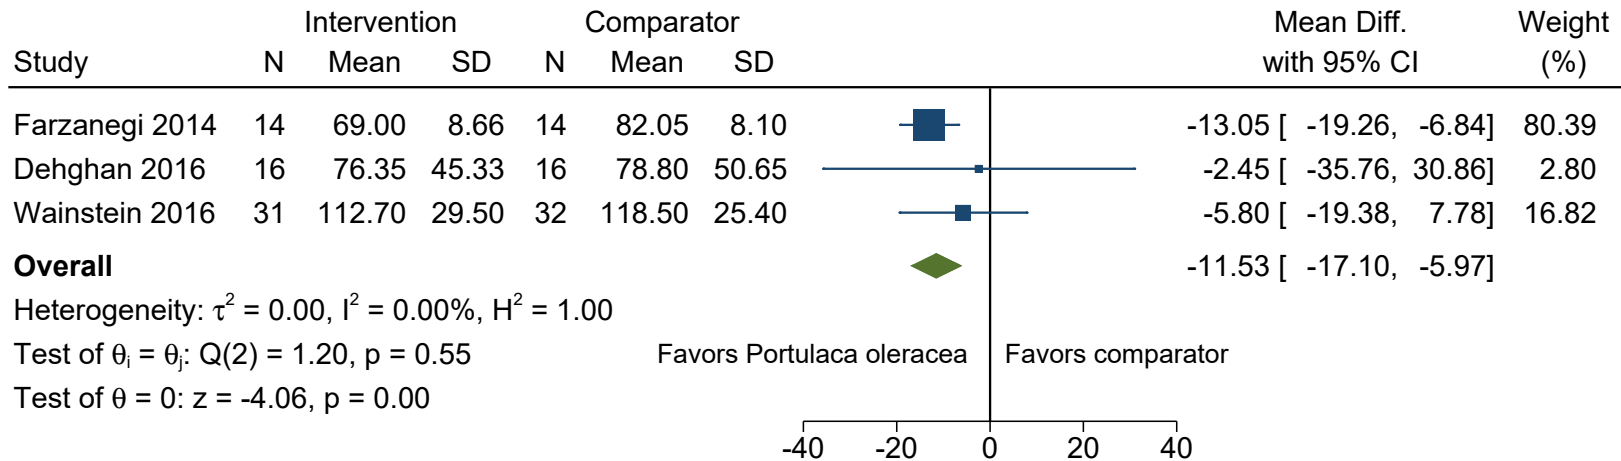

Random-effects REML model

Supplement: Data_Sheet_1.zip [file Data_Sheet_1.zip]

# Allium sativum - HbA1c

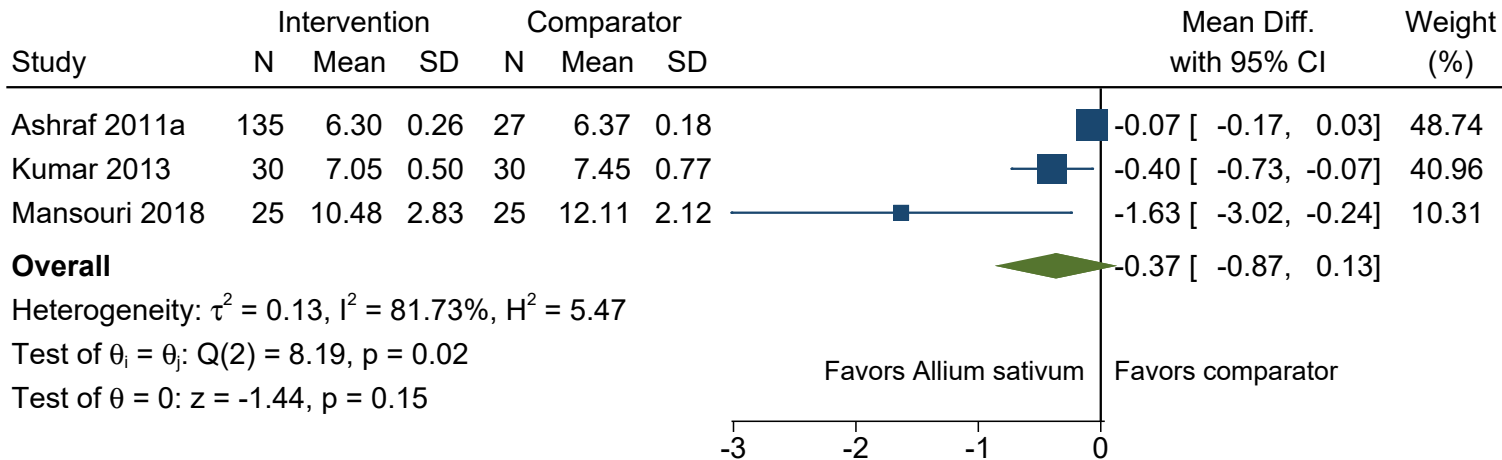

Supplement: Data_Sheet_1.zip [file Data_Sheet_1.zip]

# Shilajit - HbA1c

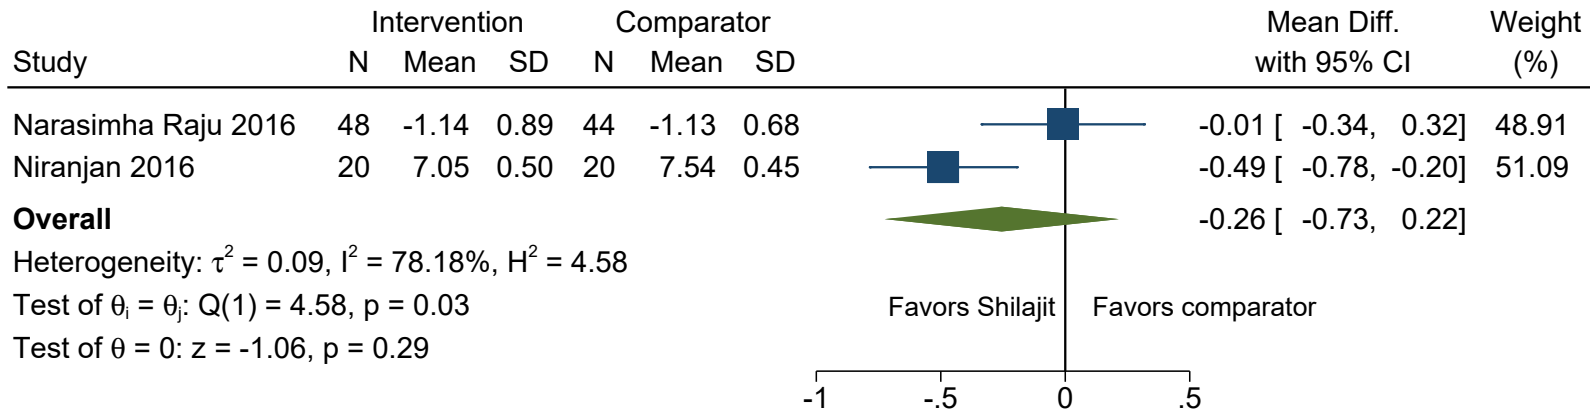

Random-effects REML model

Supplement: Data_Sheet_1.zip [file Data_Sheet_1.zip]

## Portulaca oleracea - TG

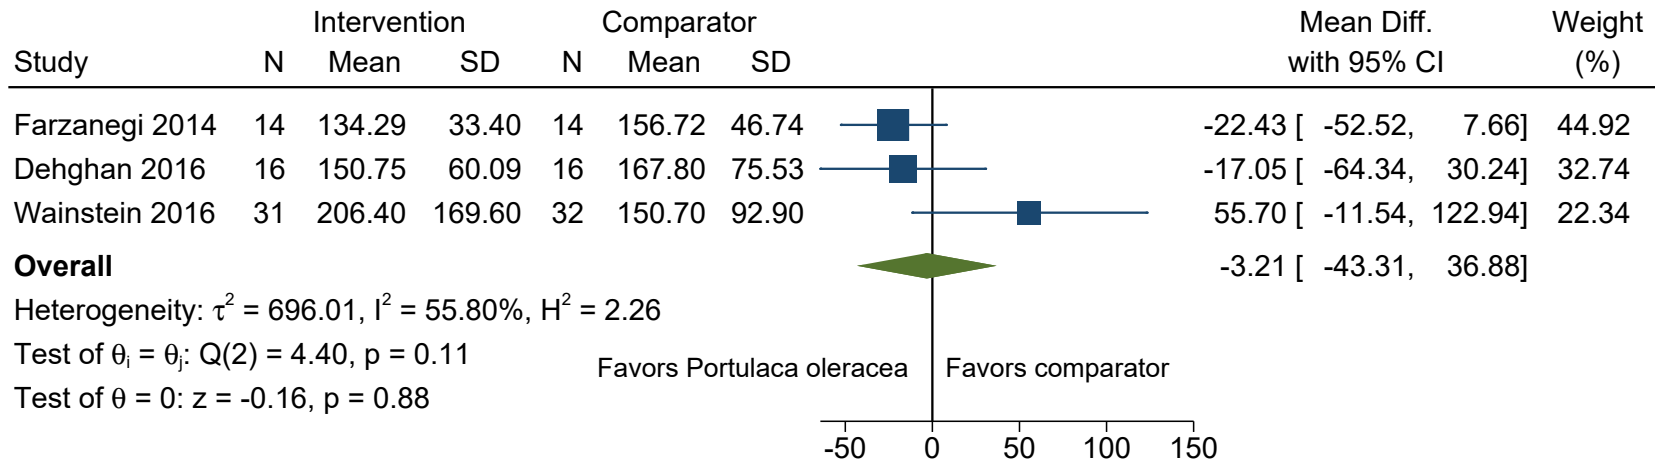

Random-effects REML model

Supplement: Data_Sheet_1.zip [file Data_Sheet_1.zip]

# Momordica charantia - DBP

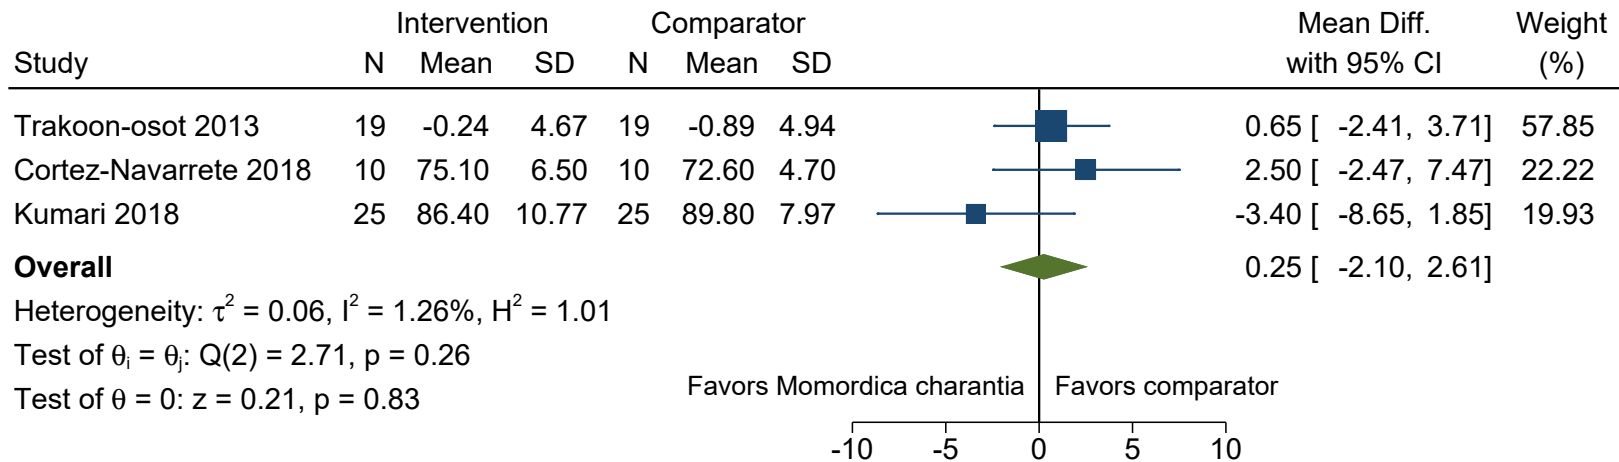

Random-effects REML model

Supplement: Data_Sheet_1.zip [file Data_Sheet_1.zip]

# Punica granatum - LDL-C

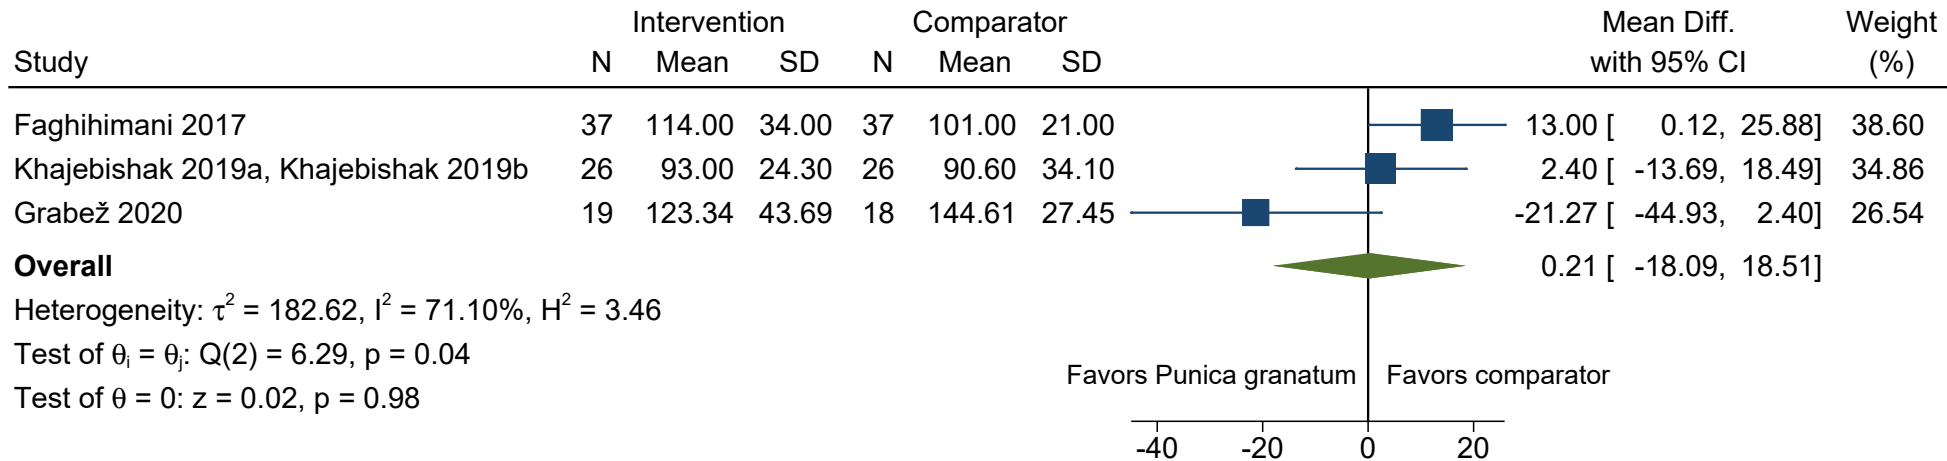

Random-effects REML model

Supplement: Data_Sheet_1.zip [file Data_Sheet_1.zip]

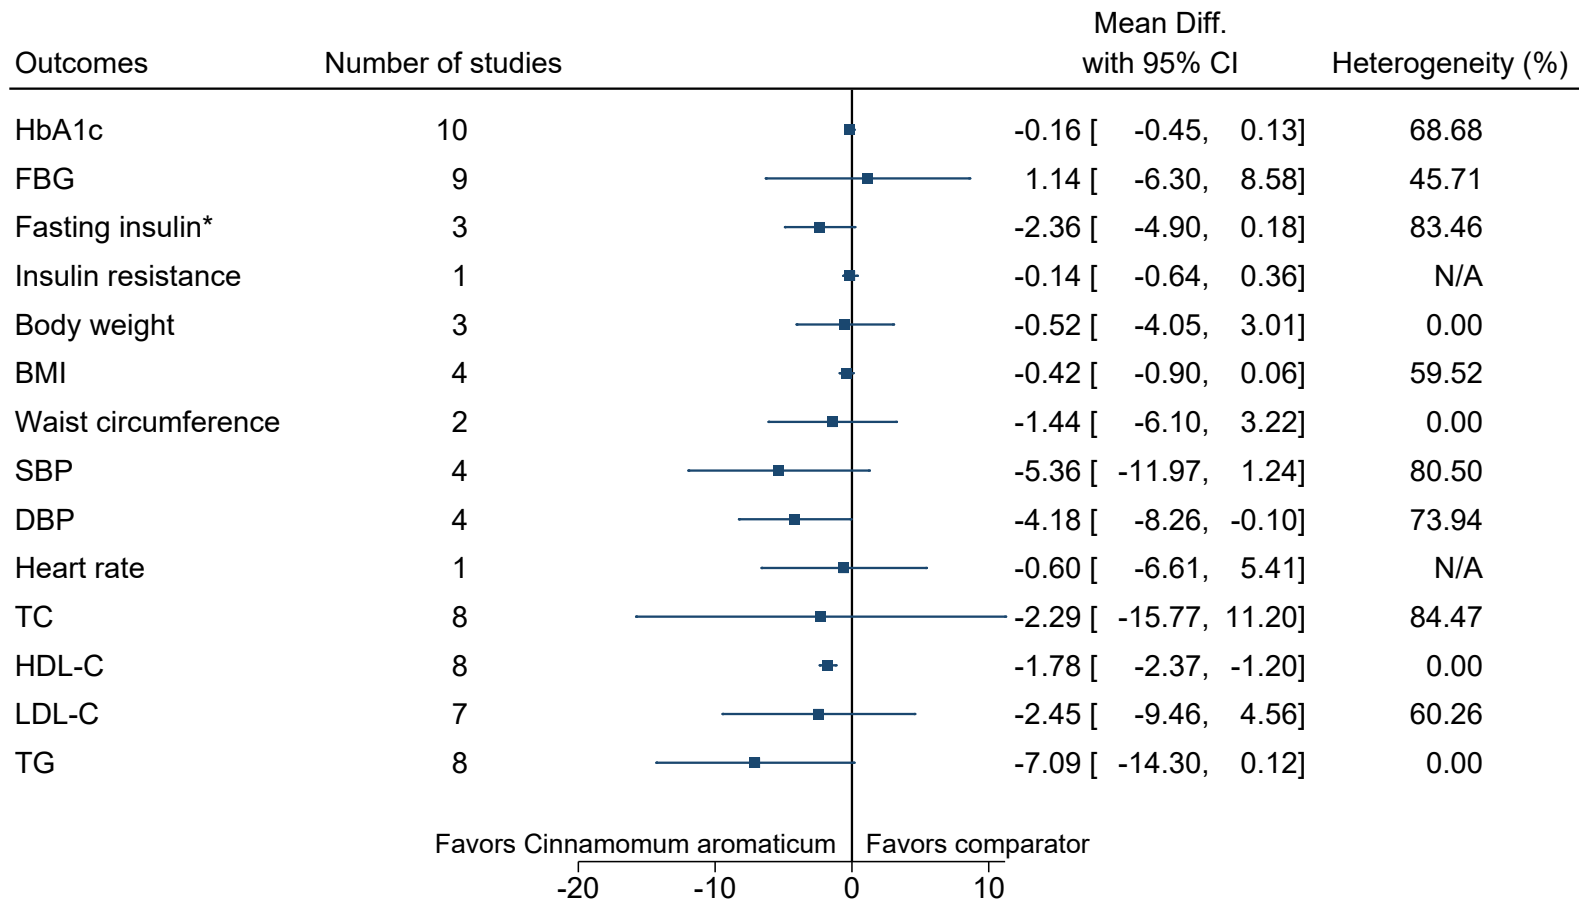

\*Favors intervention/comparator as insulin sensitizer

Supplement: Data_Sheet_1.zip [file Data_Sheet_1.zip]

# Trigonella foenum-graecum - FBG - comparator subgroup analysis

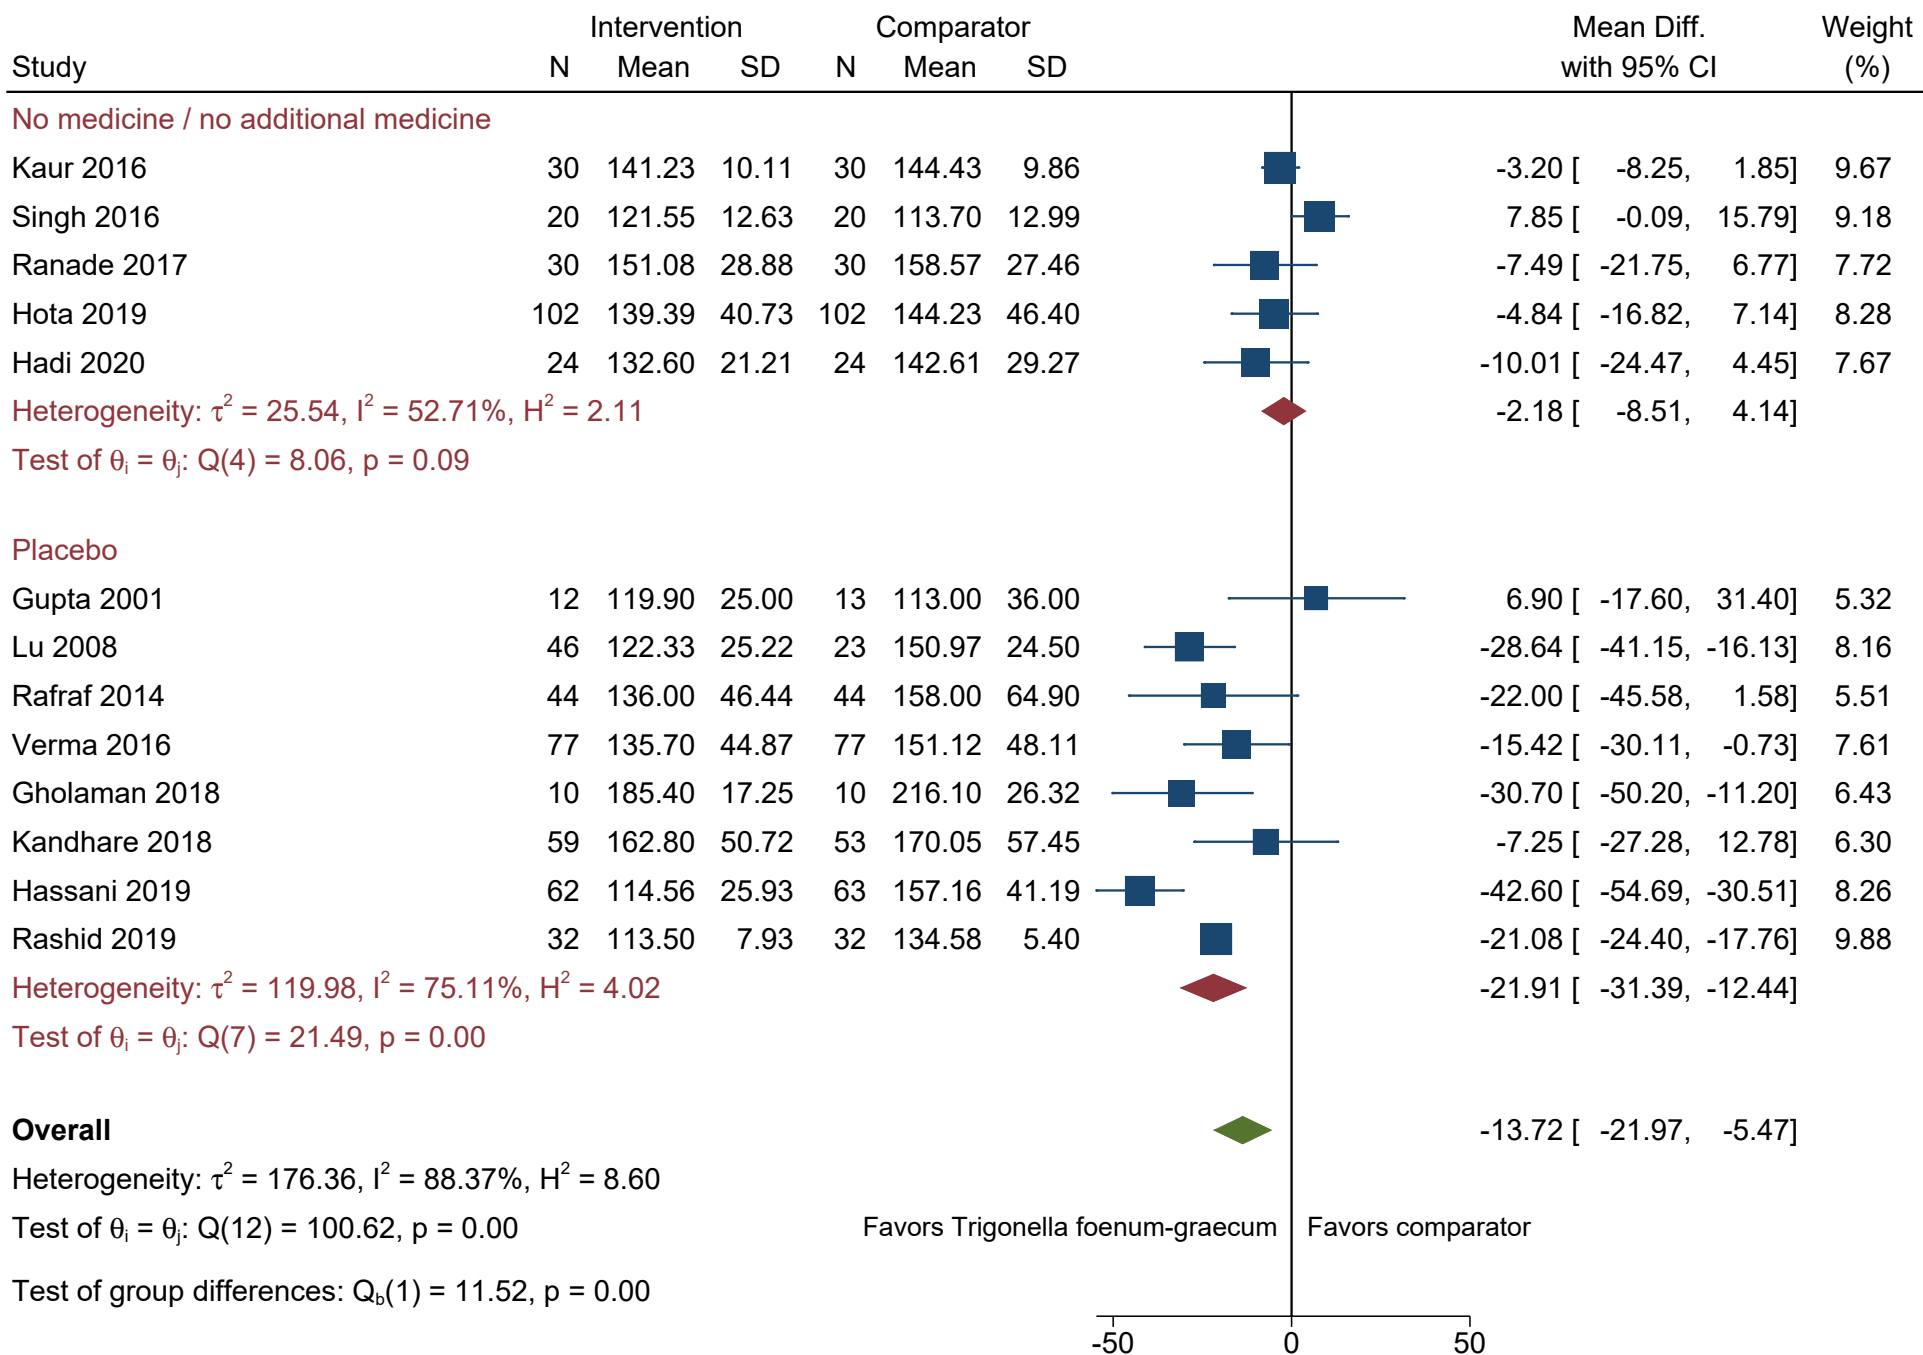

Supplement: Data_Sheet_1.zip [file Data_Sheet_1.zip]

# Trigonella foenum-graecum - HbA1c

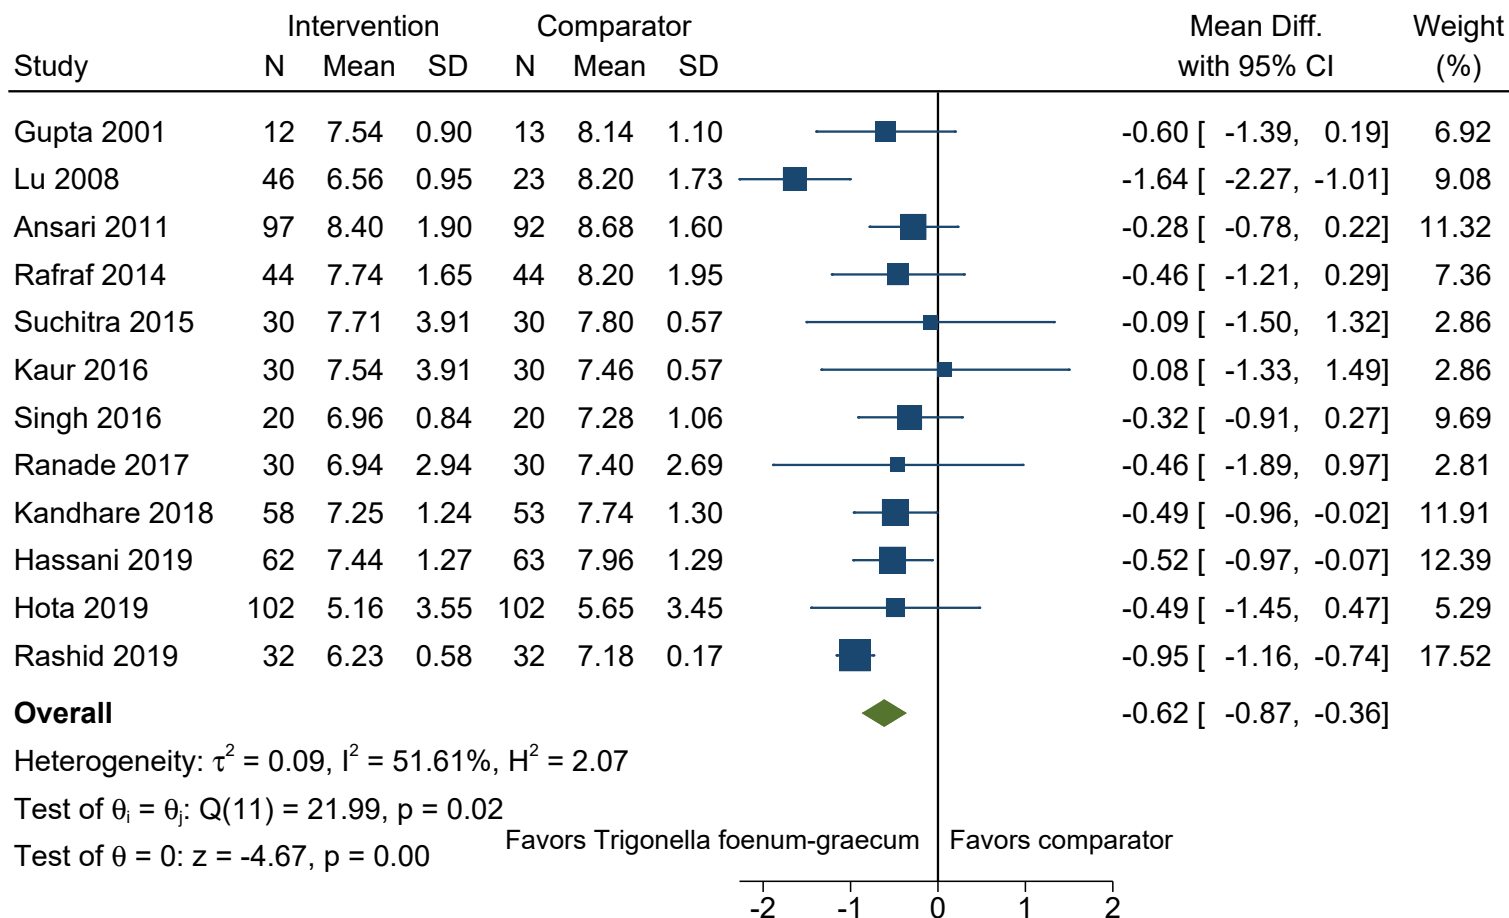

Supplement: Data_Sheet_1.zip [file Data_Sheet_1.zip]

# Cinnamomum aromaticum - LDL-C

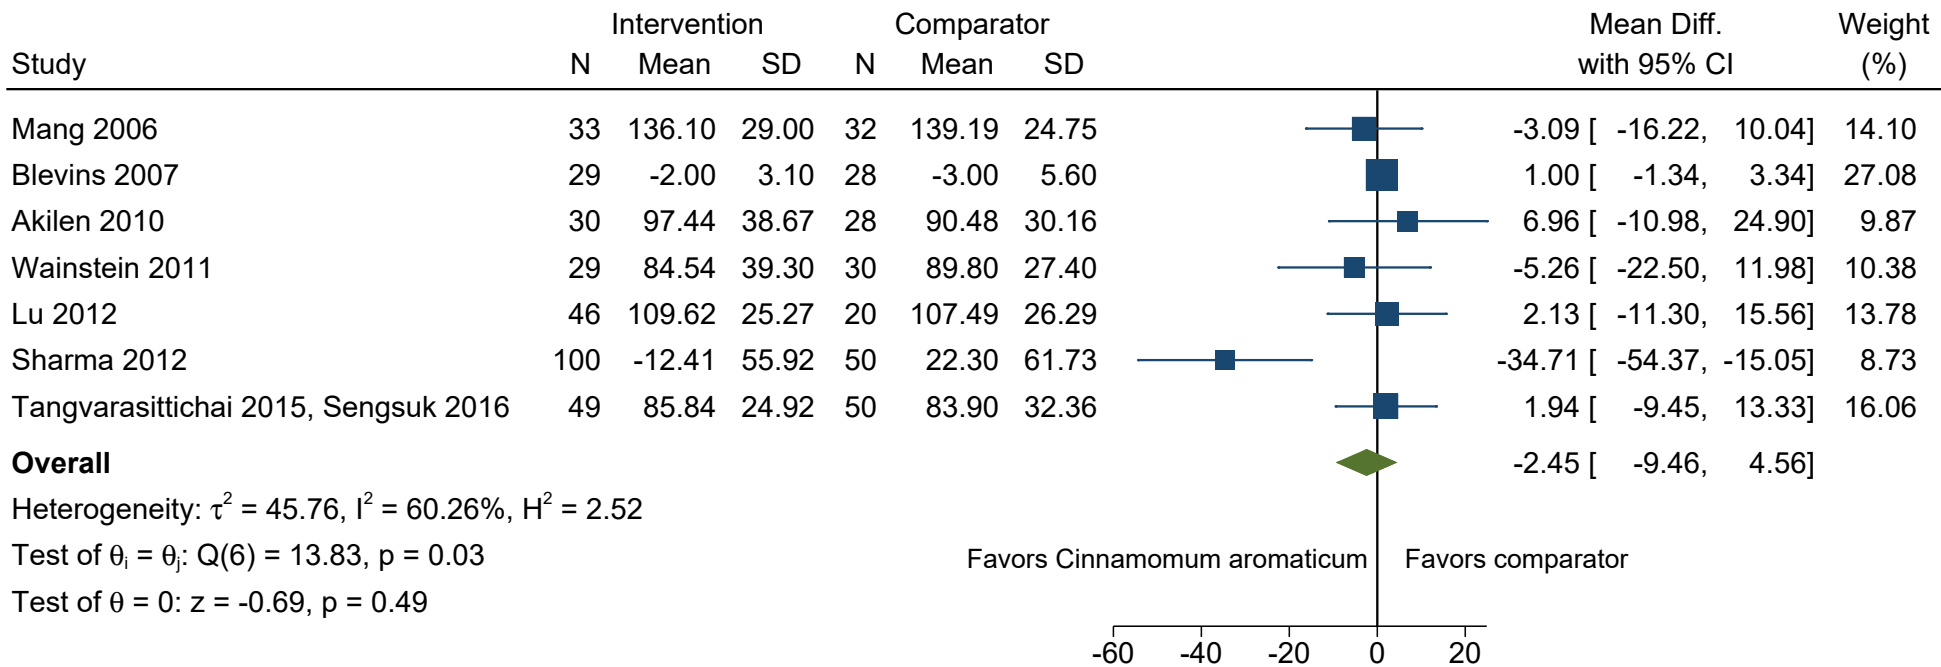

Supplement: Data_Sheet_1.zip [file Data_Sheet_1.zip]

# Tinospora cordifolia - HbA1c

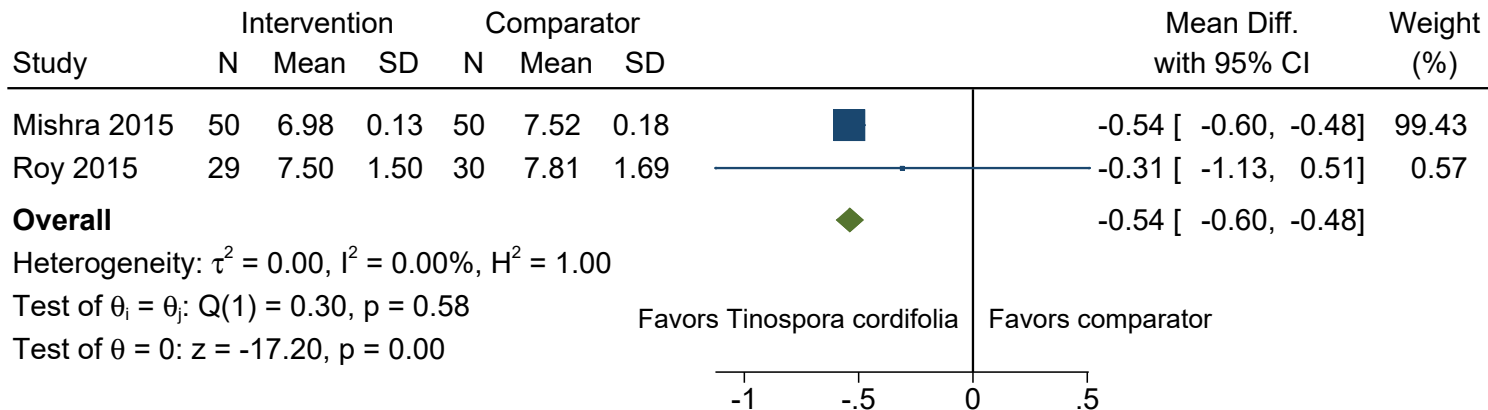

Random-effects REML model

Supplement: Data_Sheet_1.zip [file Data_Sheet_1.zip]

# Punica granatum - Insulin resistance

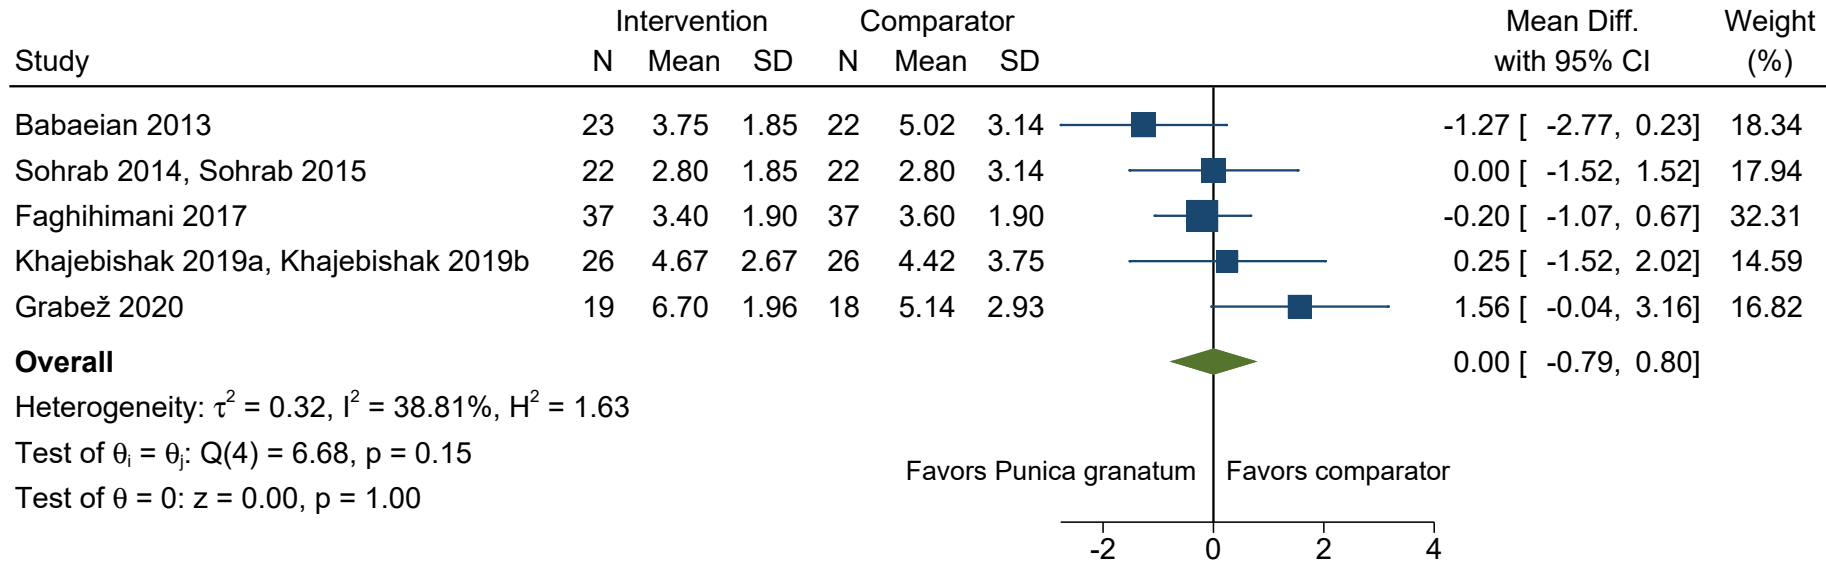

Supplement: Data_Sheet_1.zip [file Data_Sheet_1.zip]

# Cinnamomum aromaticum - Body weight

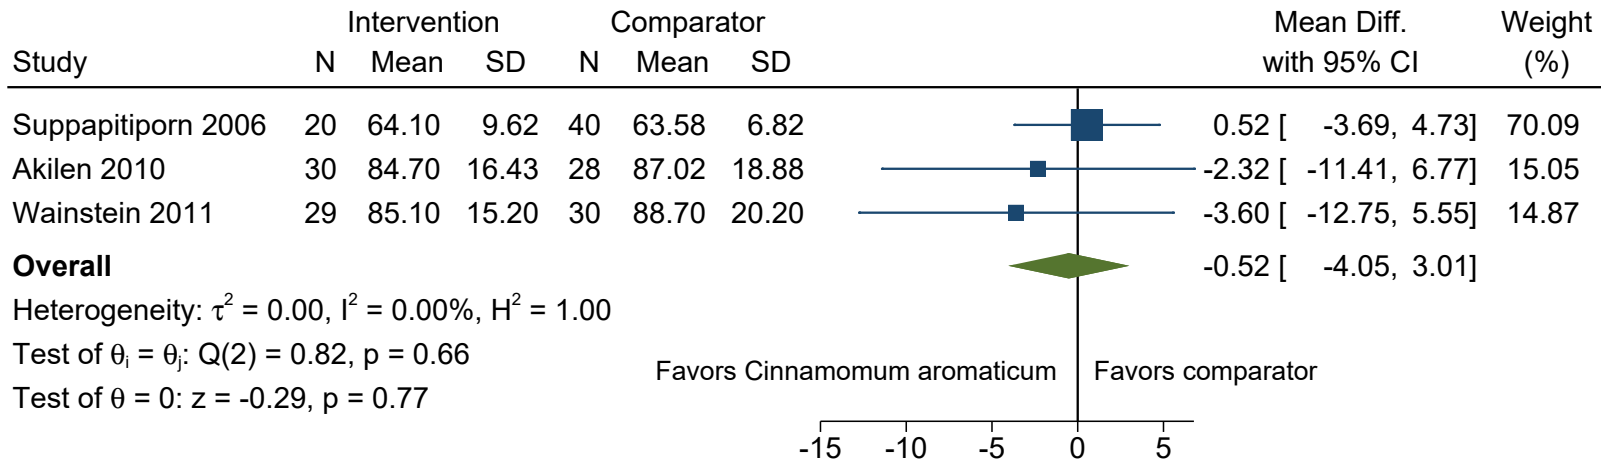

Random-effects REML model

Supplement: Data_Sheet_1.zip [file Data_Sheet_1.zip]

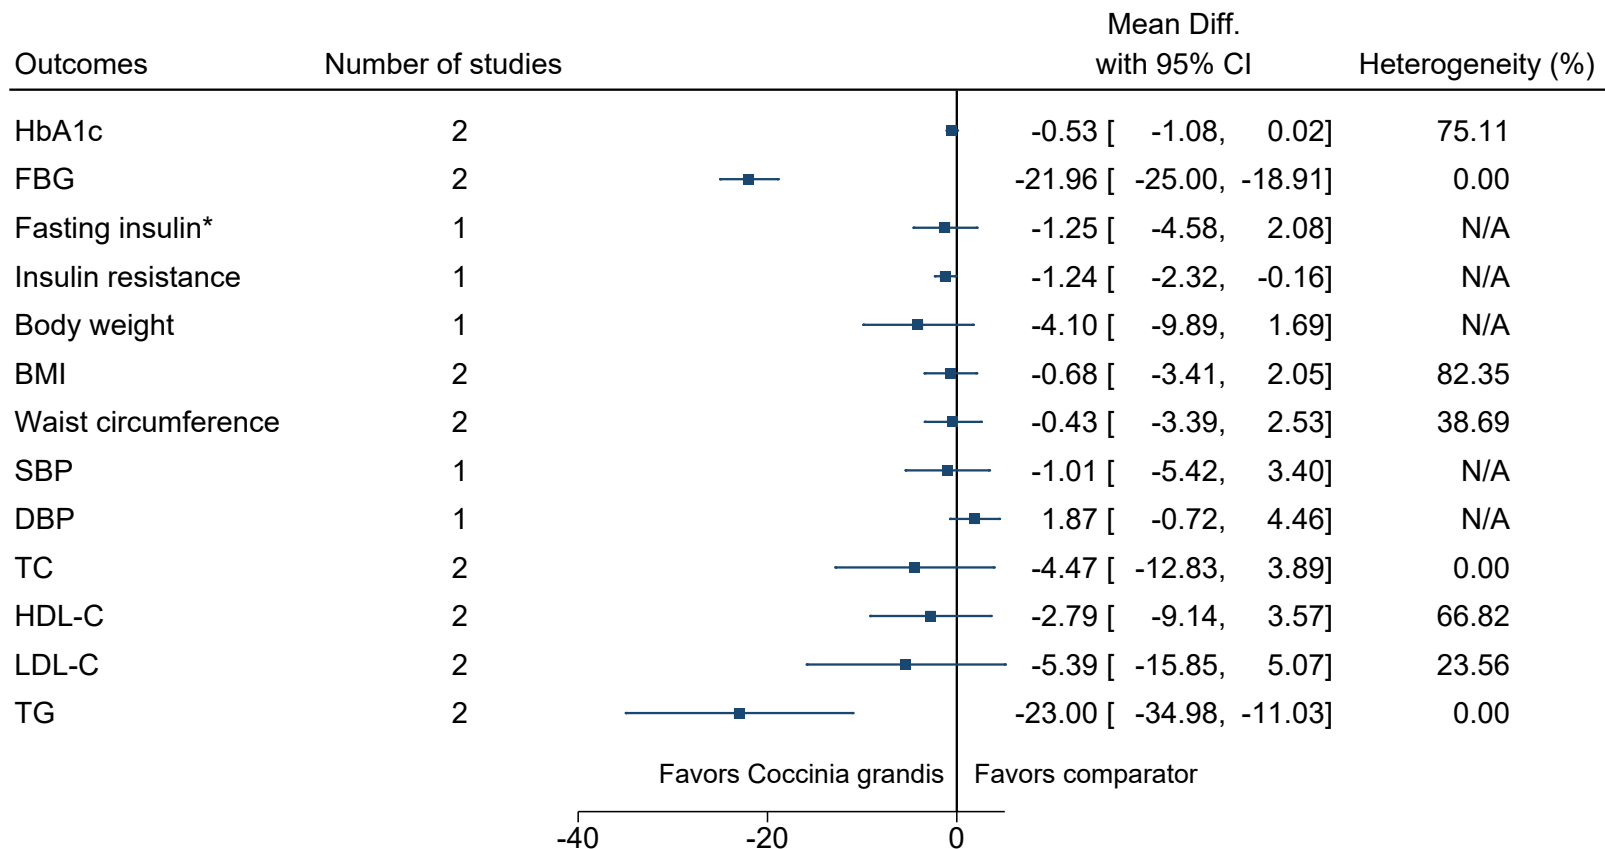

\*Favors intervention/comparator as insulin sensitizer

Supplement: Data_Sheet_1.zip [file Data_Sheet_1.zip]

# Elettaria cardamomum - TC

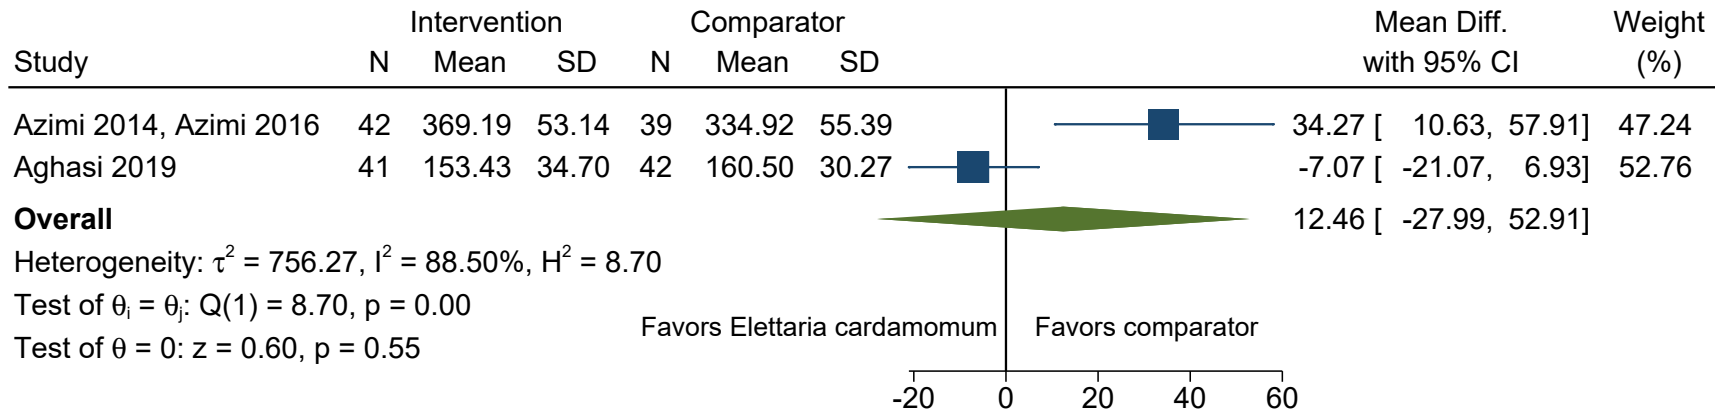

Random-effects REML model

Supplement: Data_Sheet_1.zip [file Data_Sheet_1.zip]

# Camellia sinensis - SBP

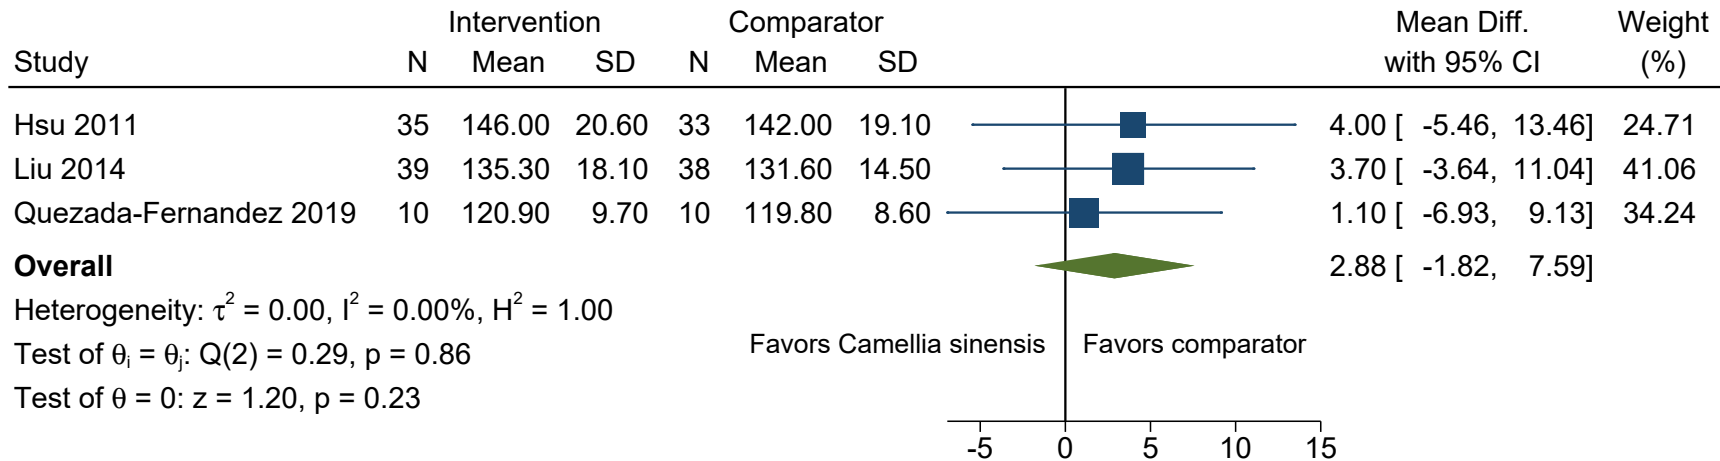

Random-effects REML model

Supplement: Data_Sheet_1.zip [file Data_Sheet_1.zip]

# Cinnamomum verum - FBG

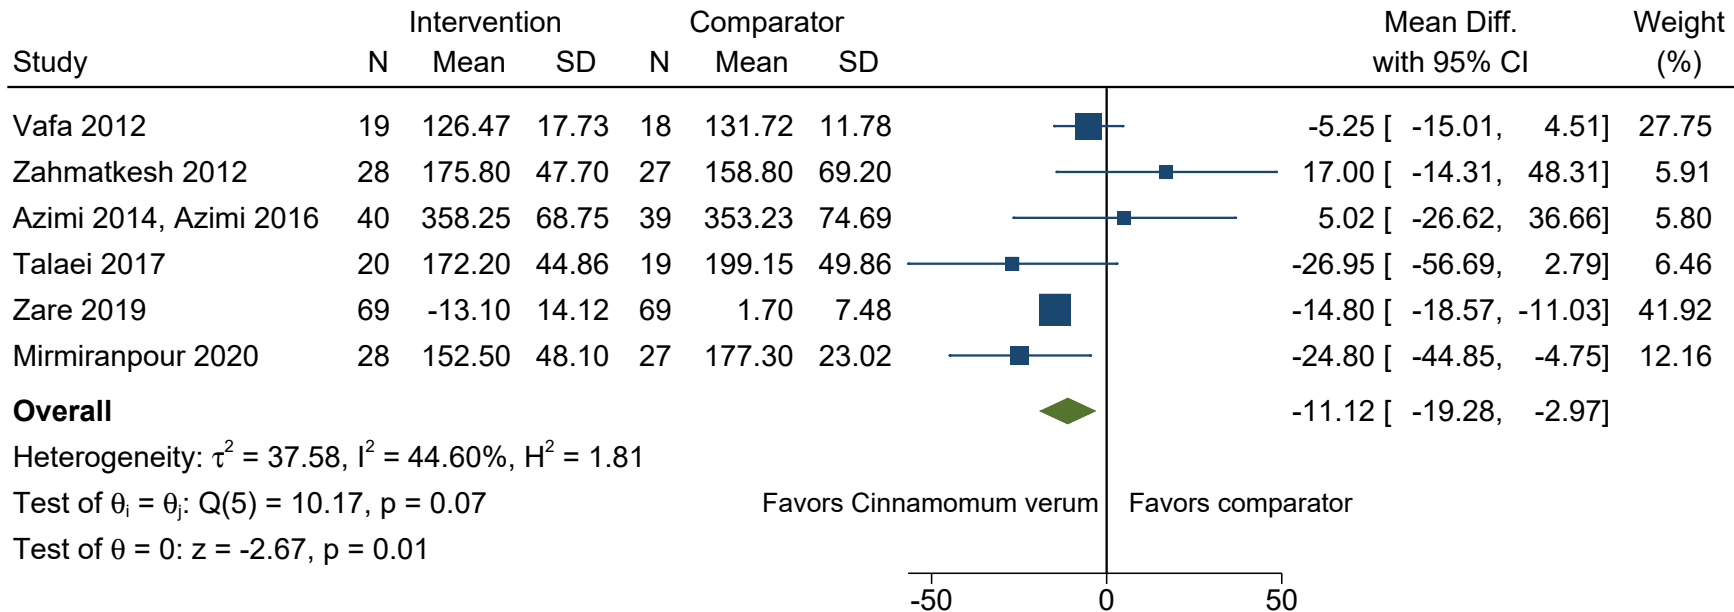

Supplement: Data_Sheet_1.zip [file Data_Sheet_1.zip]

# Tinospora cordifolia - FBG

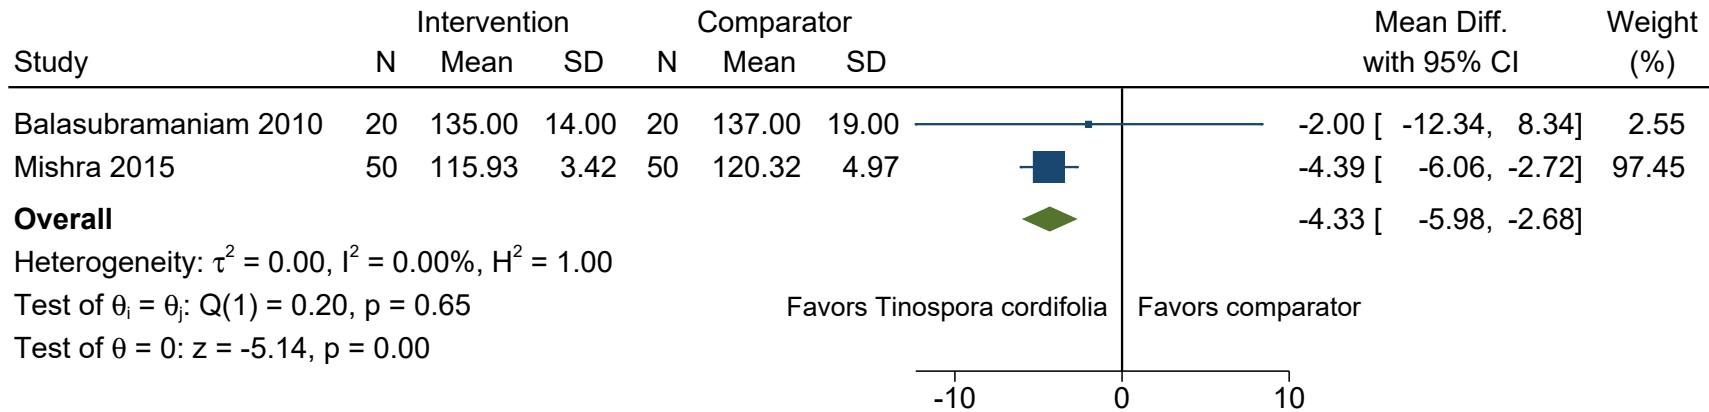

Random-effects REML model

Supplement: Data_Sheet_1.zip [file Data_Sheet_1.zip]

# Trigonella foenum-graecum - TC

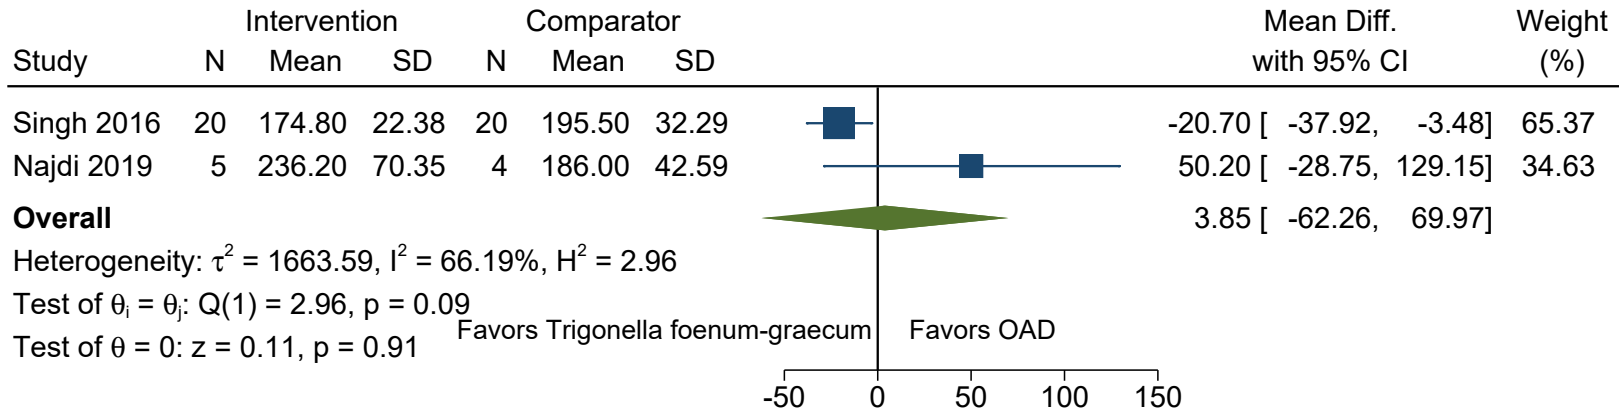

Random-effects REML model

Supplement: Data_Sheet_1.zip [file Data_Sheet_1.zip]

## Crocus sativus - TC

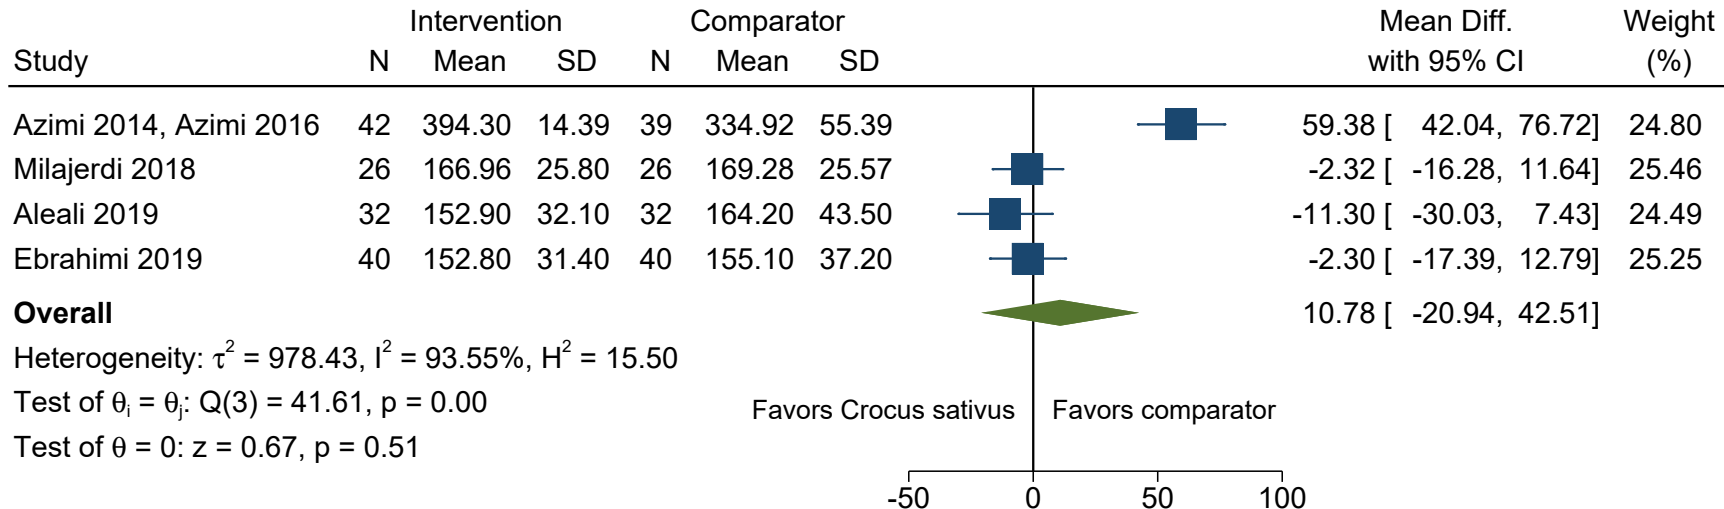

Random-effects REML model

Supplement: Data_Sheet_1.zip [file Data_Sheet_1.zip]

# Ipomoea batatas -TC

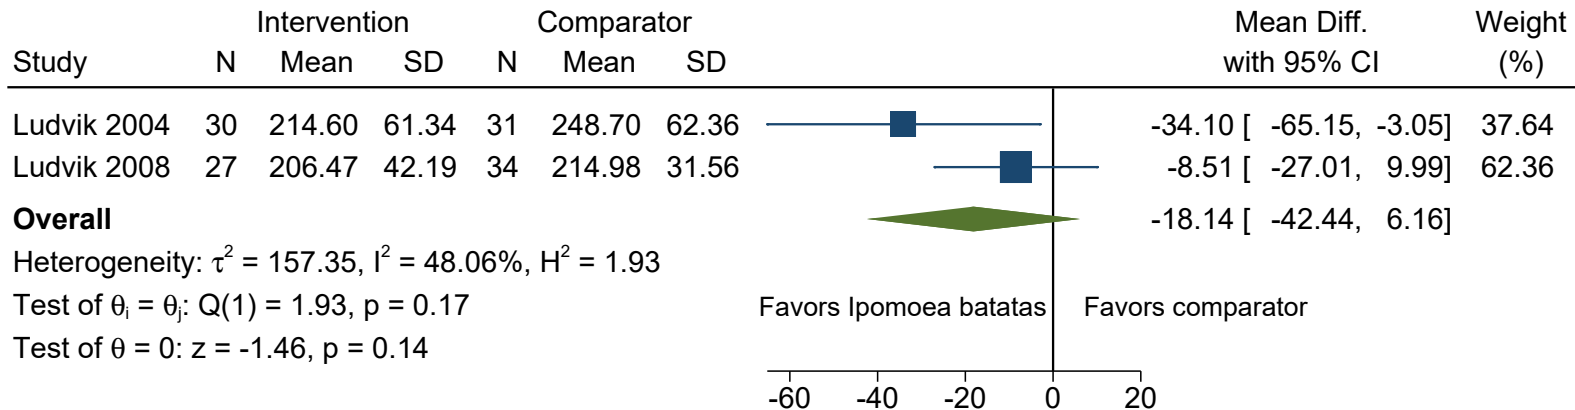

Random-effects REML model

Supplement: Data_Sheet_1.zip [file Data_Sheet_1.zip]

# Juglans regia - Fasting insulin

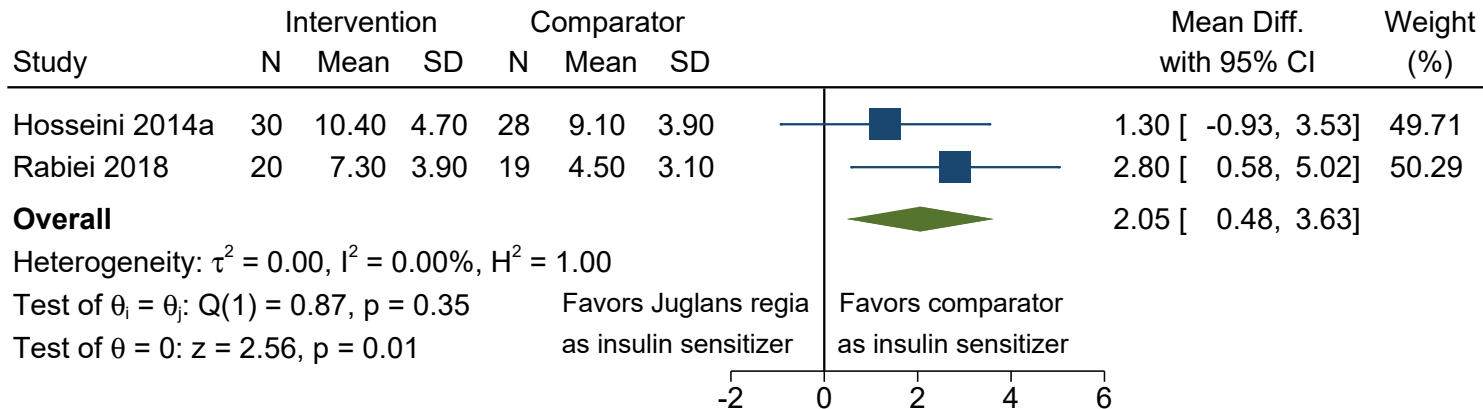

Supplement: Data_Sheet_1.zip [file Data_Sheet_1.zip]

# Punica granatum - TG

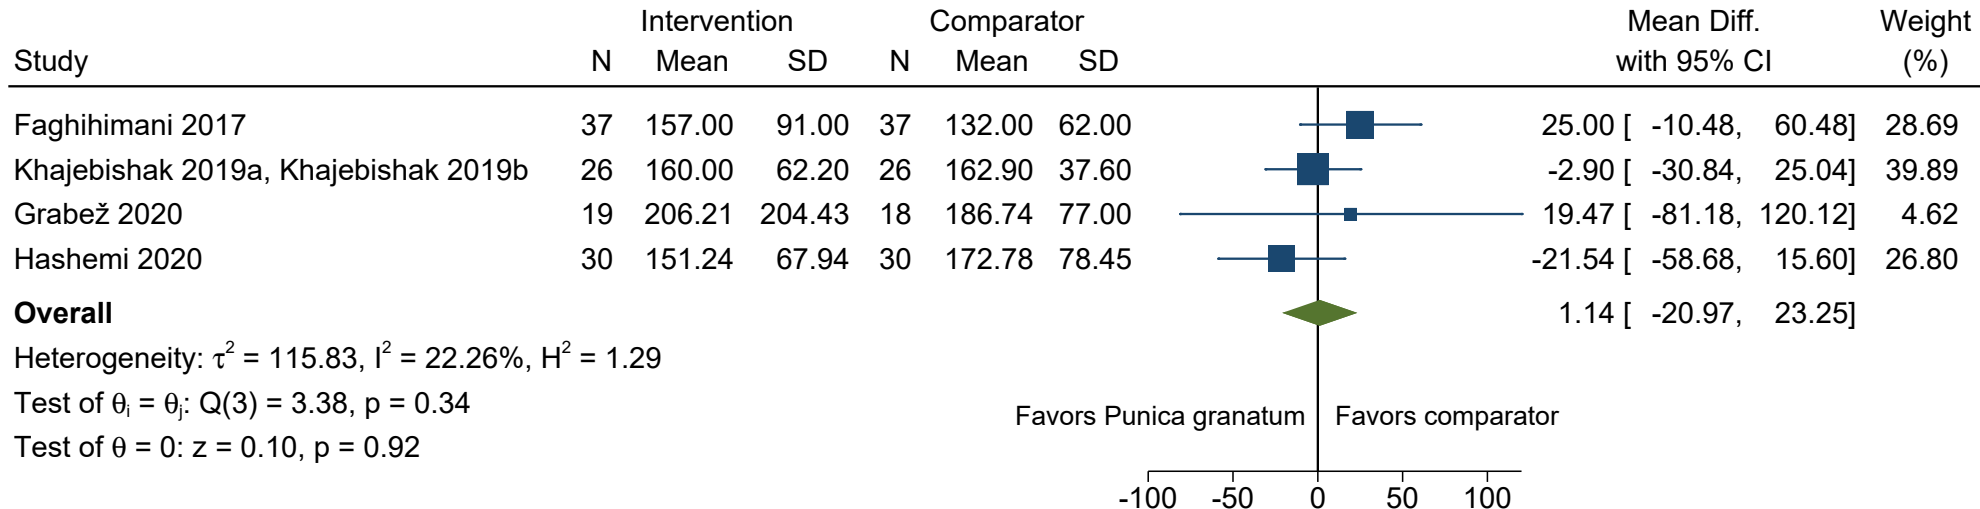

Random-effects REML model

Supplement: Data_Sheet_1.zip [file Data_Sheet_1.zip]

# Aegle marmelos - FBG

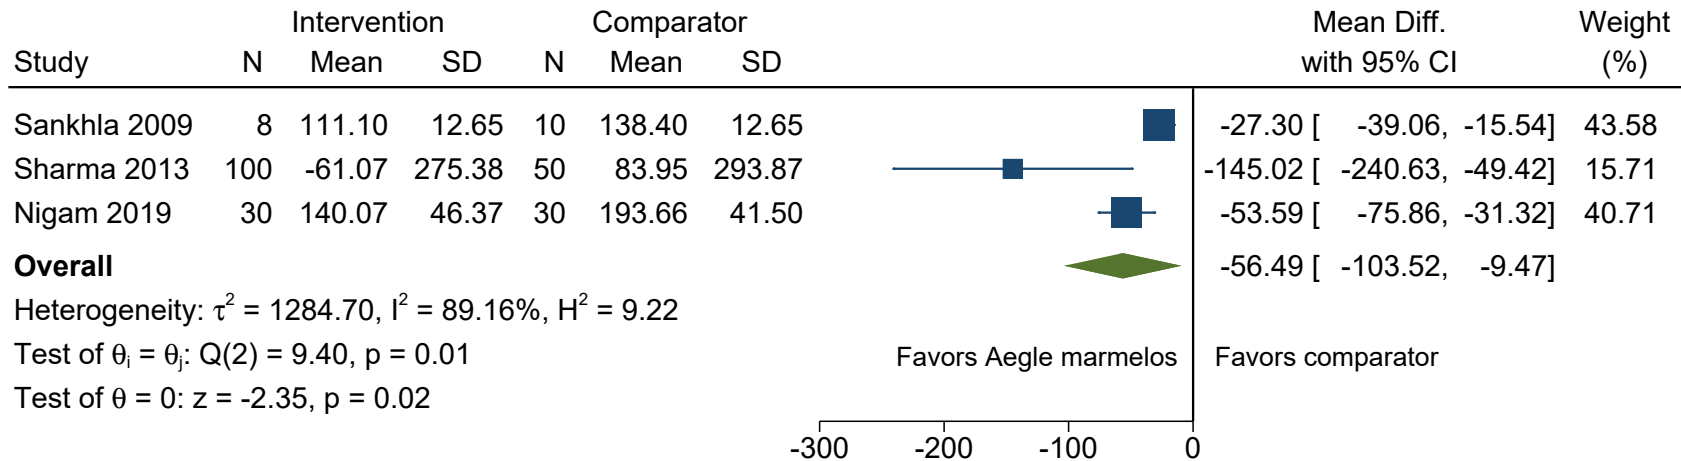

Supplement: Data_Sheet_1.zip [file Data_Sheet_1.zip]

# Curcuma longa - LDL-C

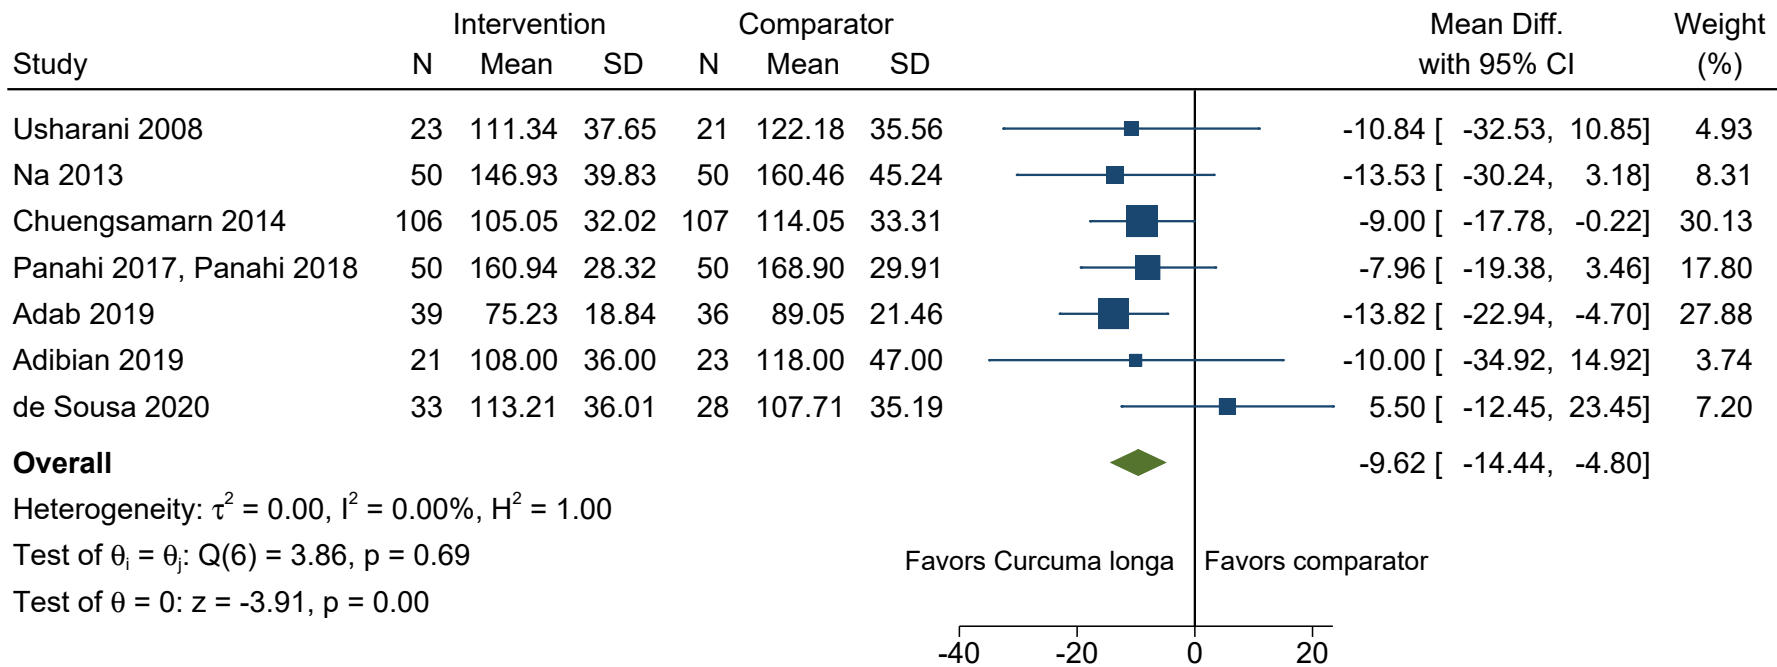

Supplement: Data_Sheet_1.zip [file Data_Sheet_1.zip]

# Anethum graveolens - FBG

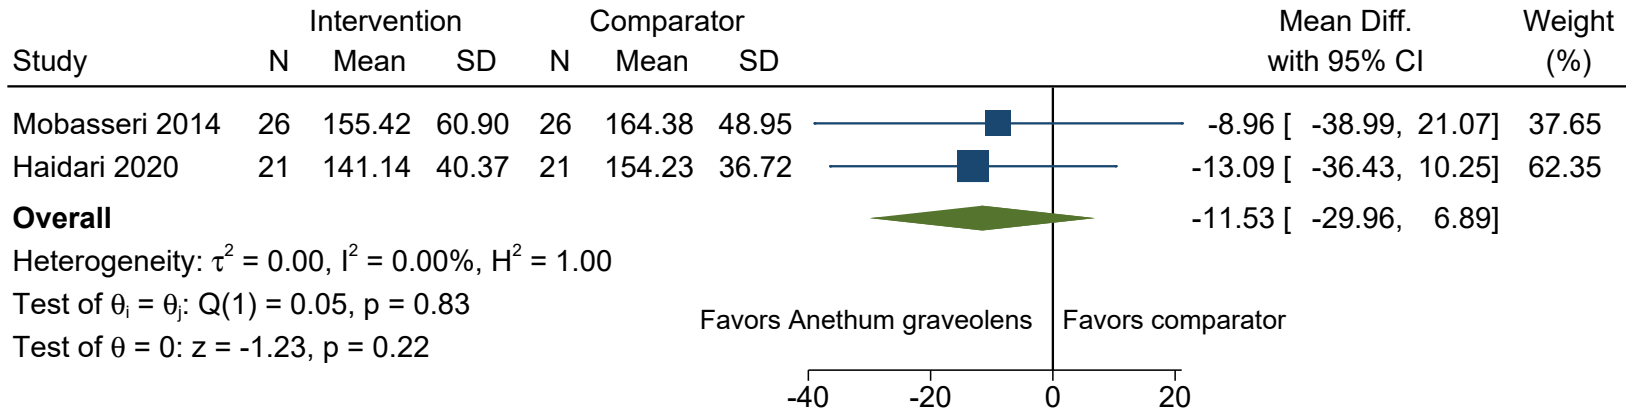

Random-effects REML model

Supplement: Data_Sheet_1.zip [file Data_Sheet_1.zip]

## Camellia sinensis - HRQoL

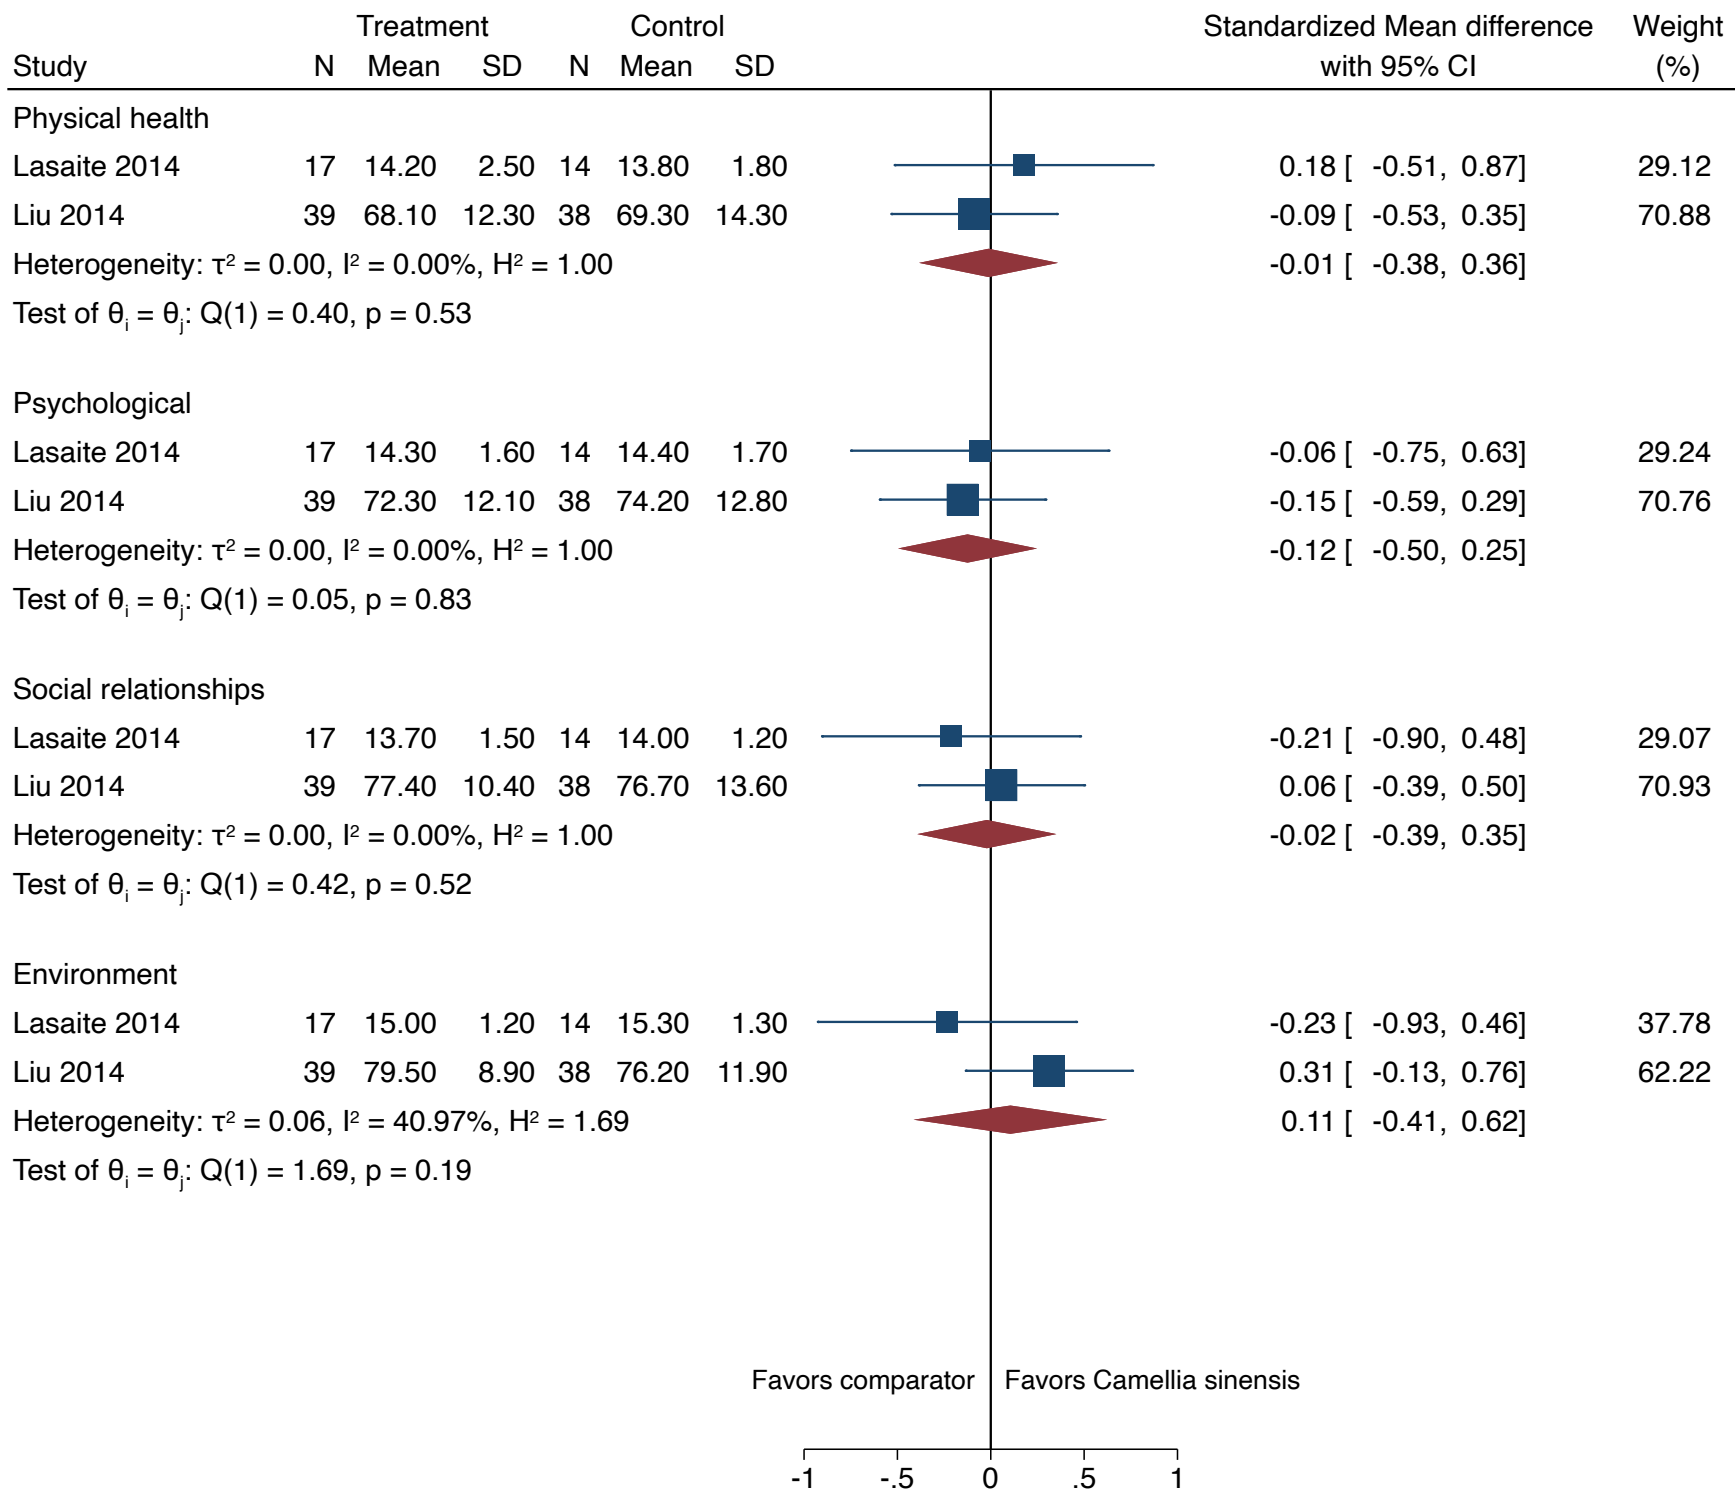

Supplement: Data_Sheet_1.zip [file Data_Sheet_1.zip]

# Gynostemma pentaphyllum - Fasting insulin

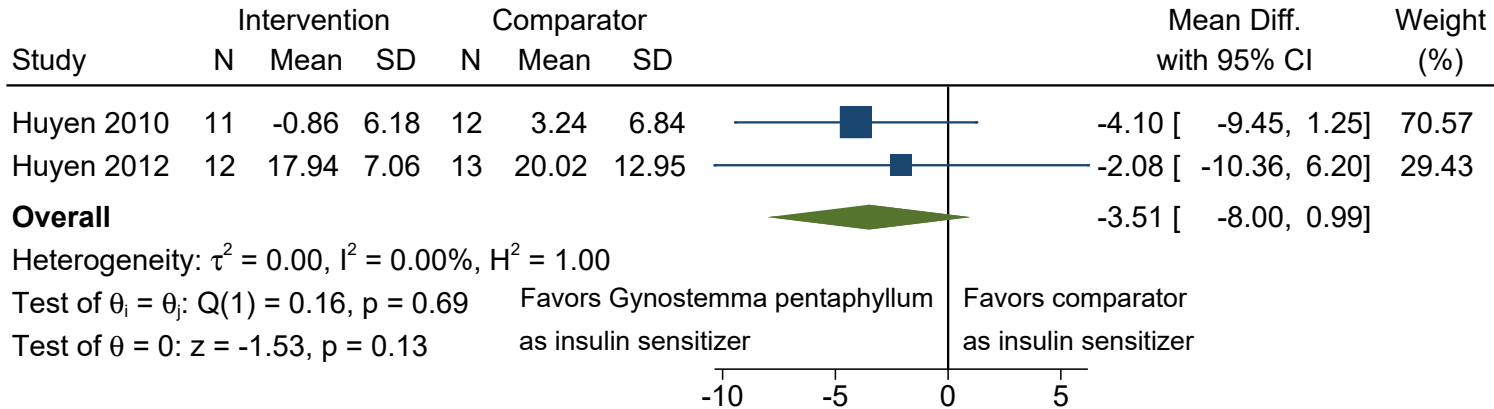

Random-effects REML model

Supplement: Data_Sheet_1.zip [file Data_Sheet_1.zip]

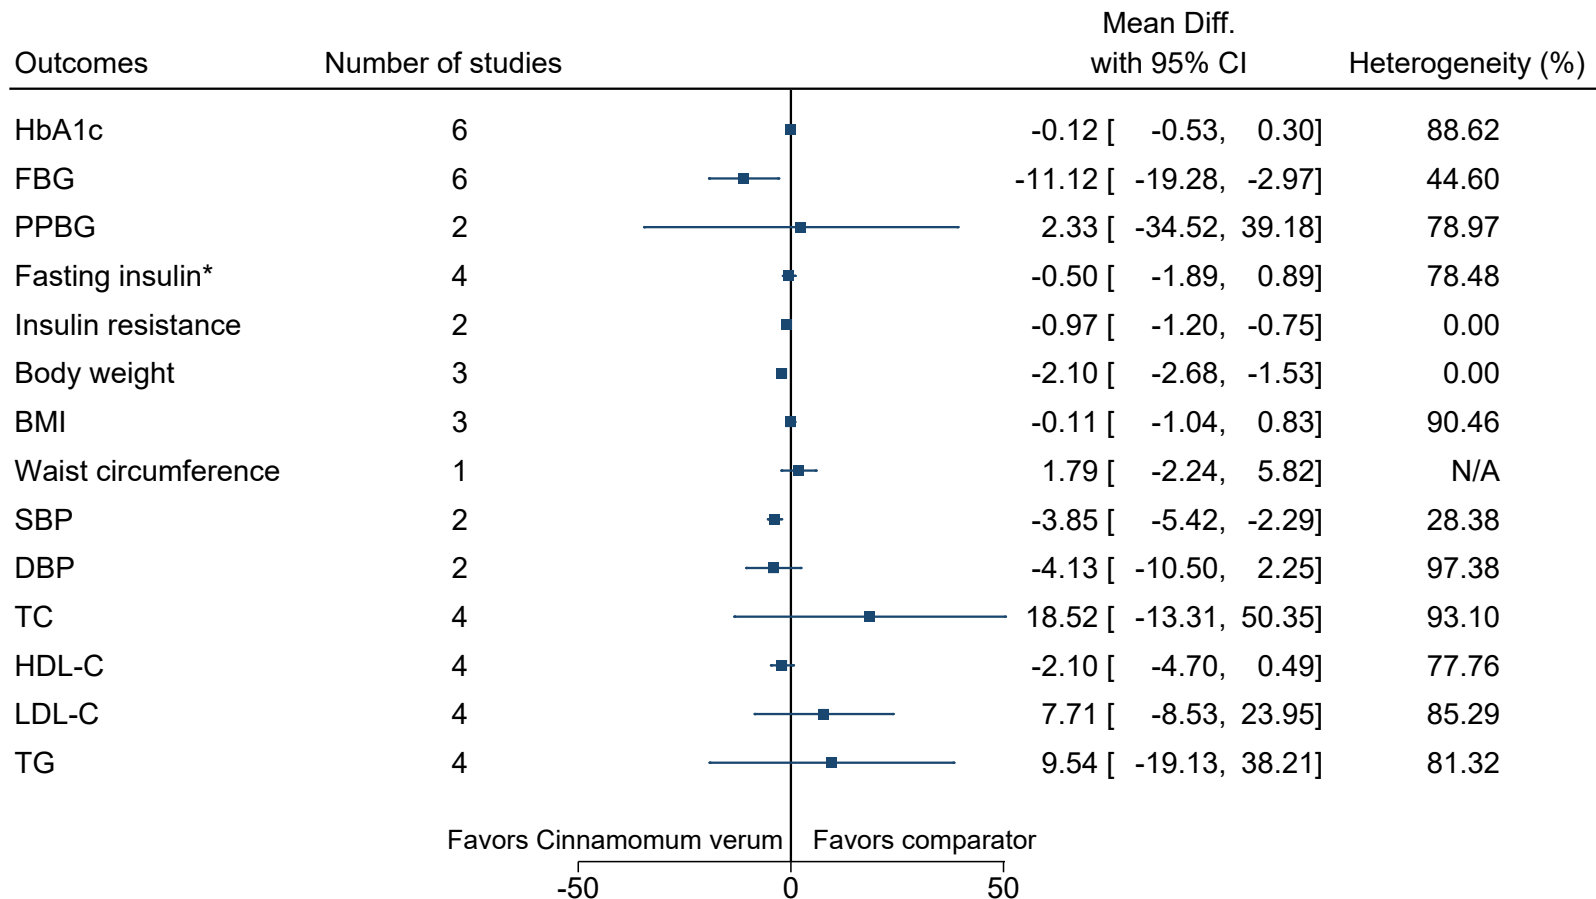

\*Favors intervention/comparator as insulin sensitizer

Supplement: Data_Sheet_1.zip [file Data_Sheet_1.zip]

# Allium sativum - LDL-C

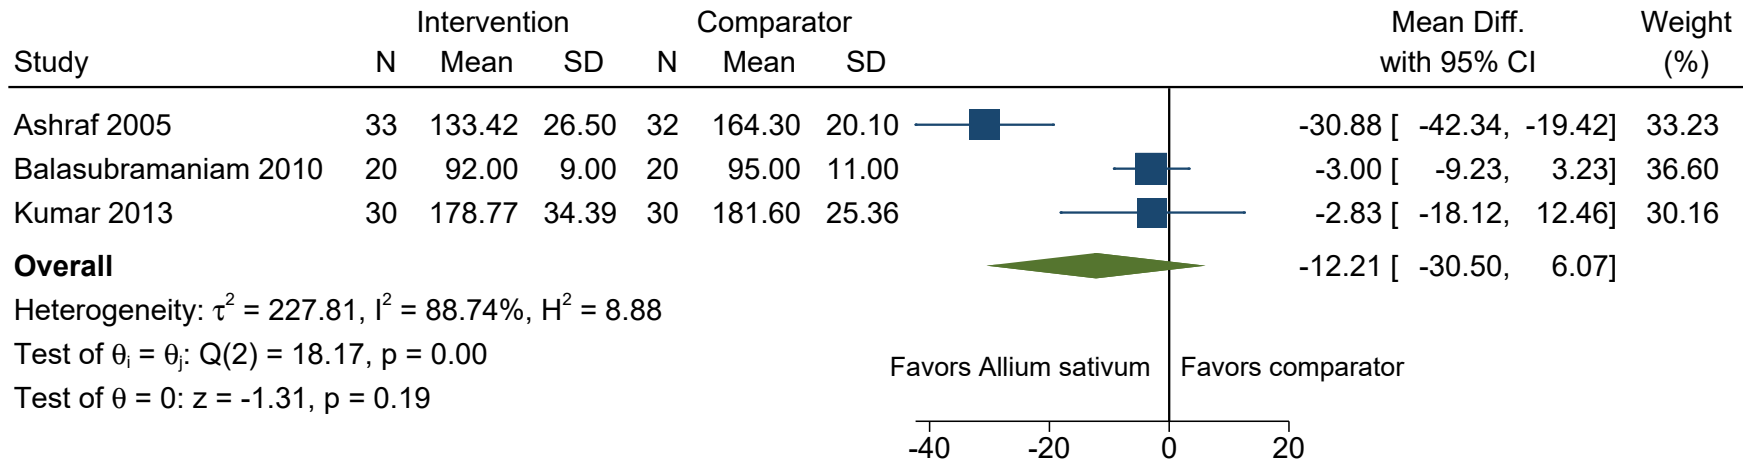

Supplement: Data_Sheet_1.zip [file Data_Sheet_1.zip]

# Cyamopsis tetragonoloba - FBG

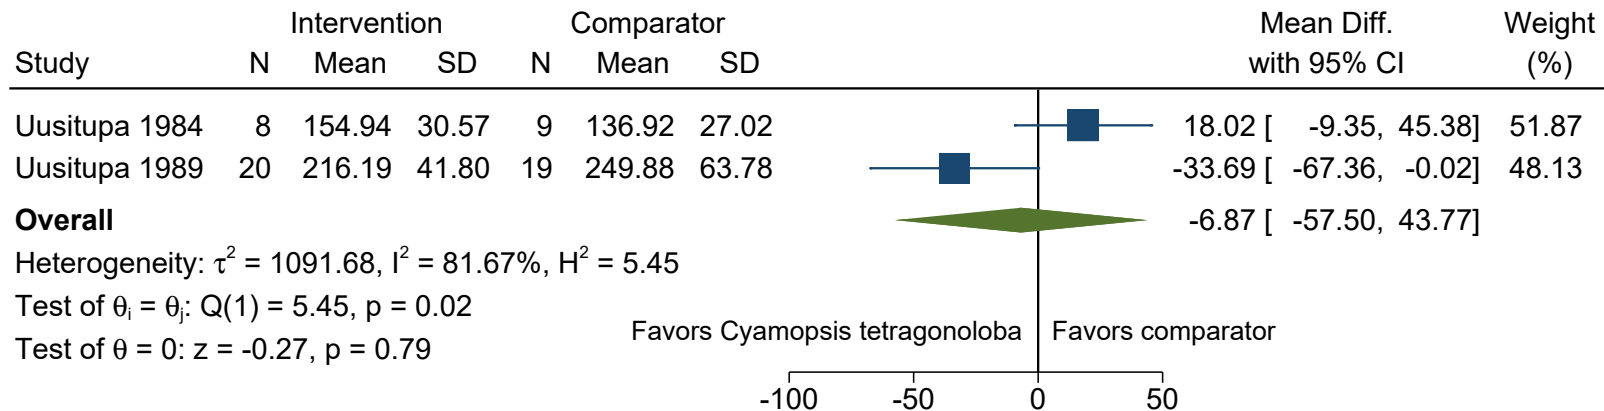

Random-effects REML model

Supplement: Data_Sheet_1.zip [file Data_Sheet_1.zip]

# Curcuma longa - Body weight

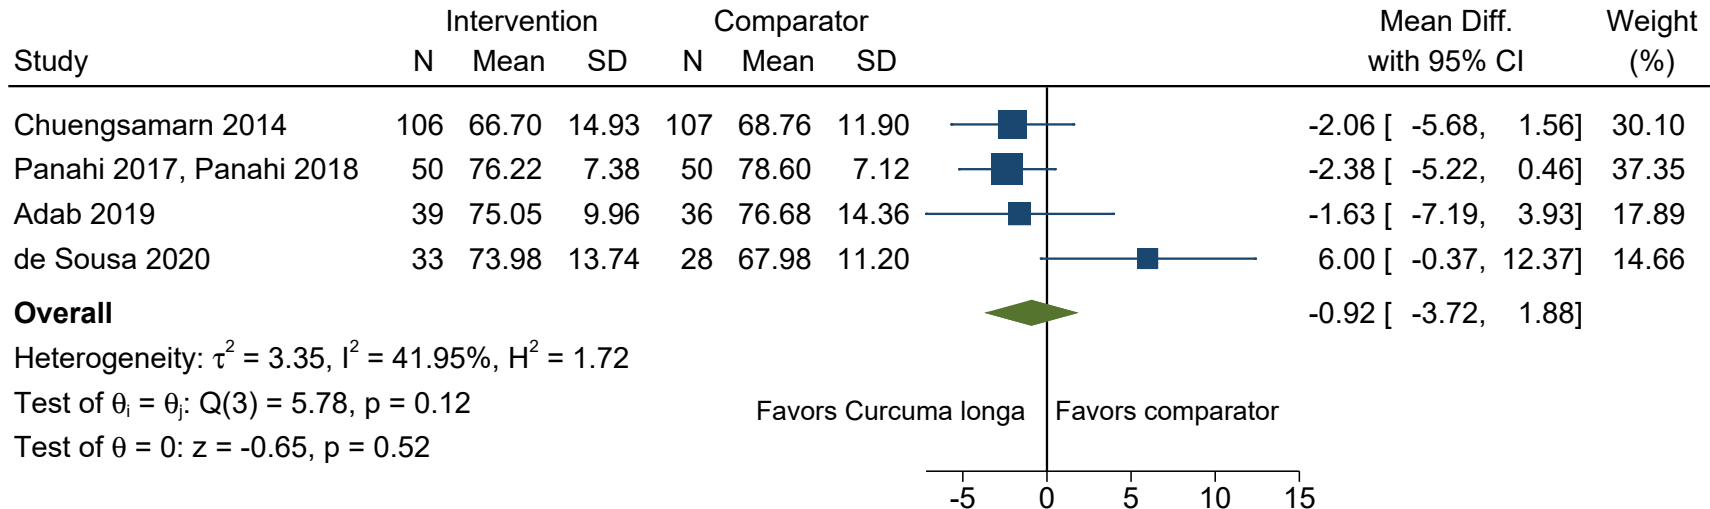

Random-effects REML model

Supplement: Data_Sheet_1.zip [file Data_Sheet_1.zip]

# Urtica dioica - TC

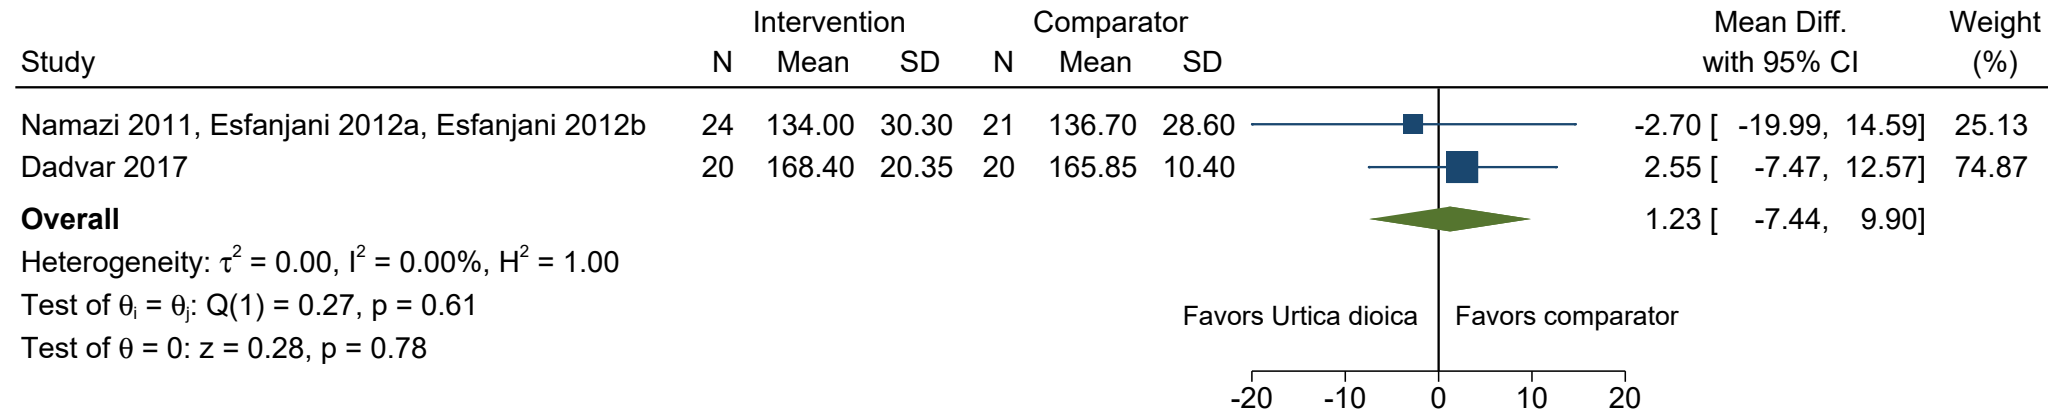

Random-effects REML model

Supplement: Data_Sheet_1.zip [file Data_Sheet_1.zip]

# Allium sativum - HDL-C

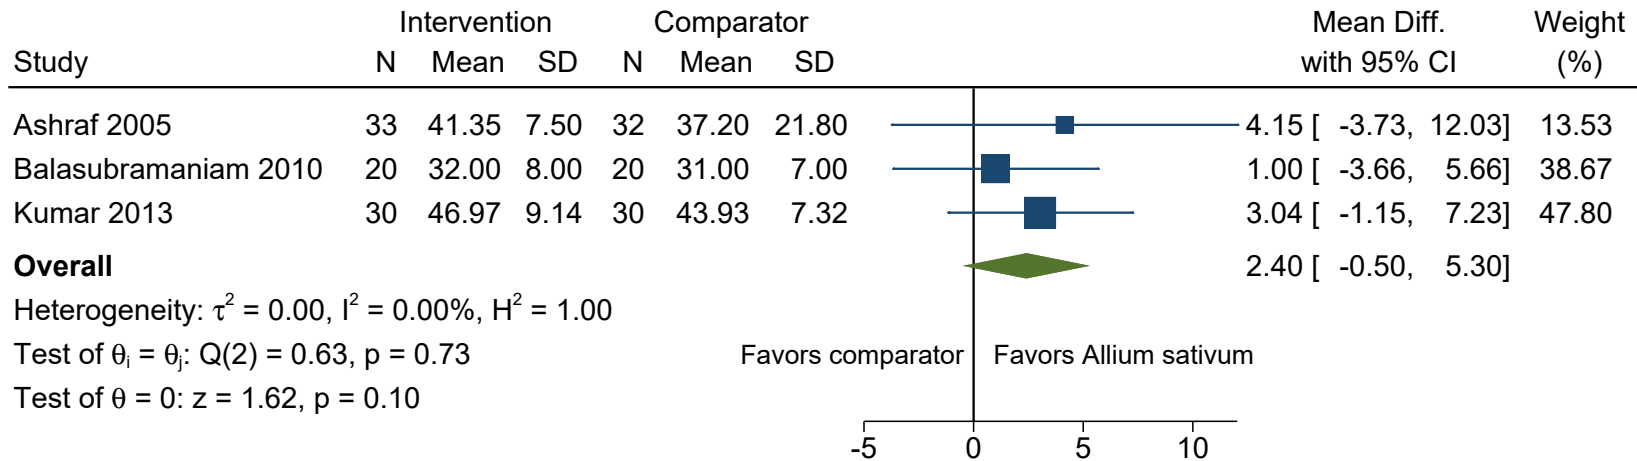

Random-effects REML model

Supplement: Data_Sheet_1.zip [file Data_Sheet_1.zip]

# Juglans regia - Body weight

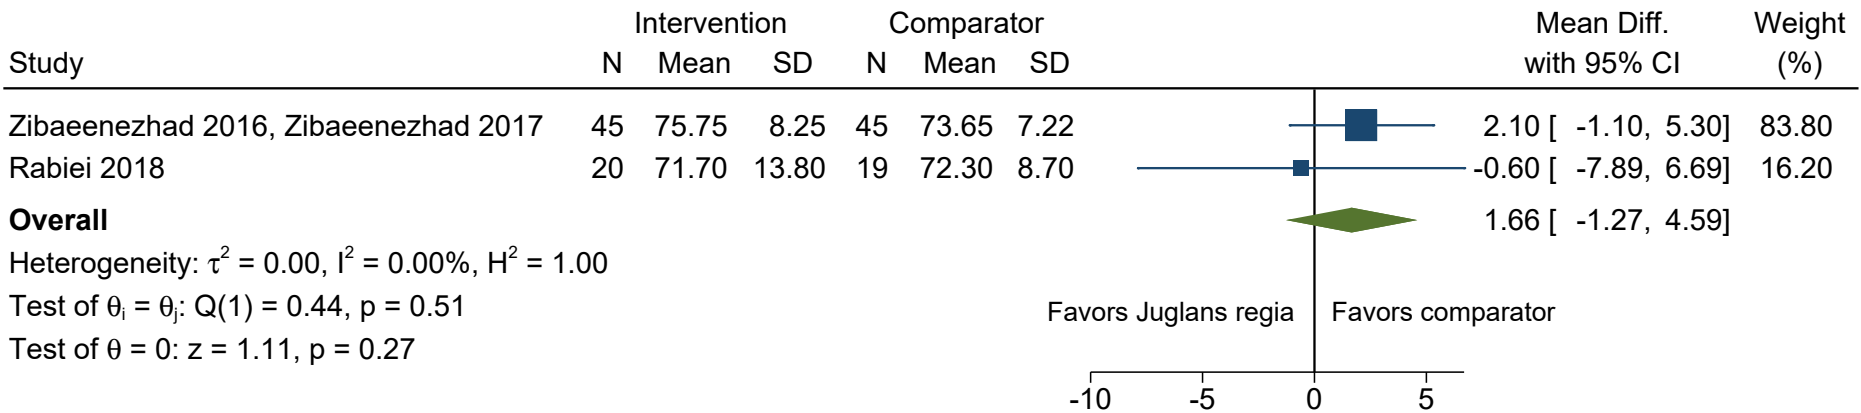

Random-effects REML model

Supplement: Data_Sheet_1.zip [file Data_Sheet_1.zip]

# Camellia sinensis - LDL-C

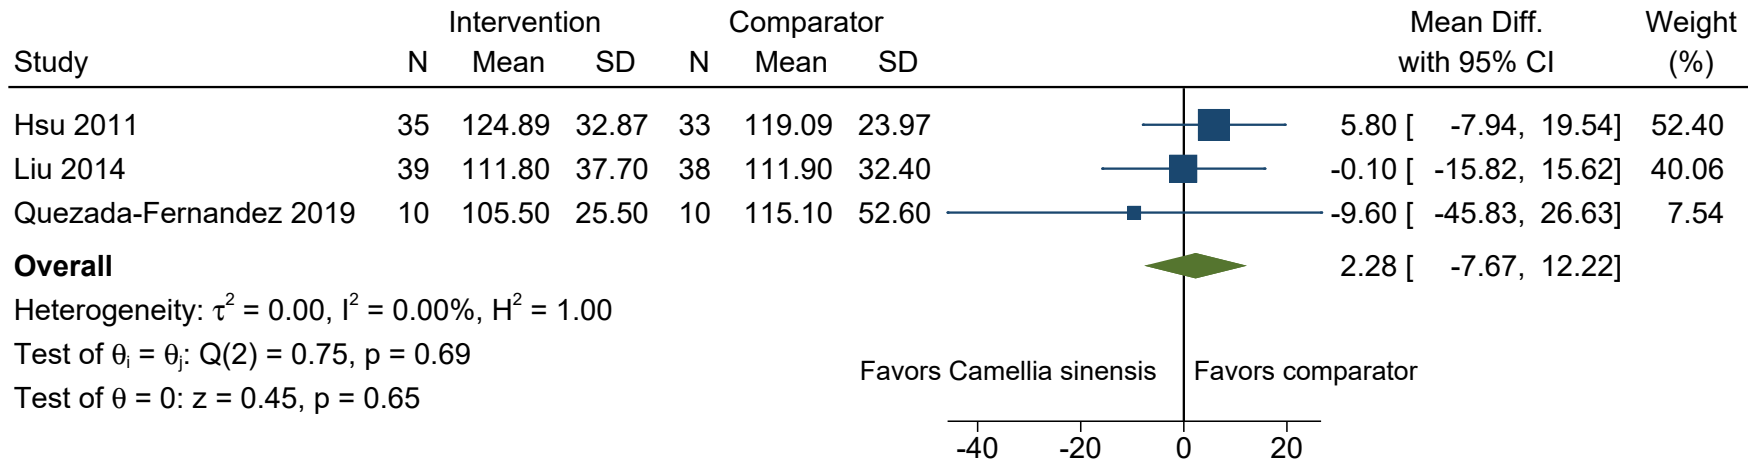

Random-effects REML model

Supplement: Data_Sheet_1.zip [file Data_Sheet_1.zip]

# Camellia sinensis - HbA1c

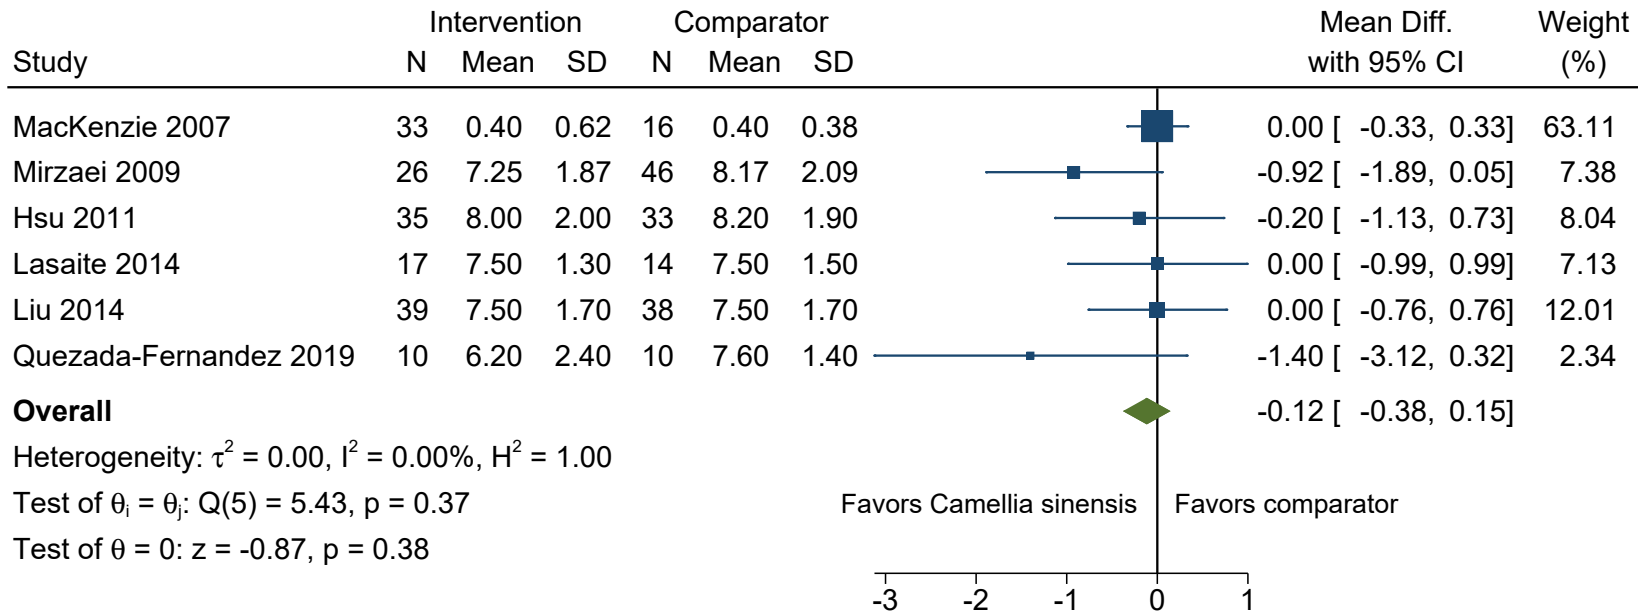

Supplement: Data_Sheet_1.zip [file Data_Sheet_1.zip]

# Camellia sinensis - DBP

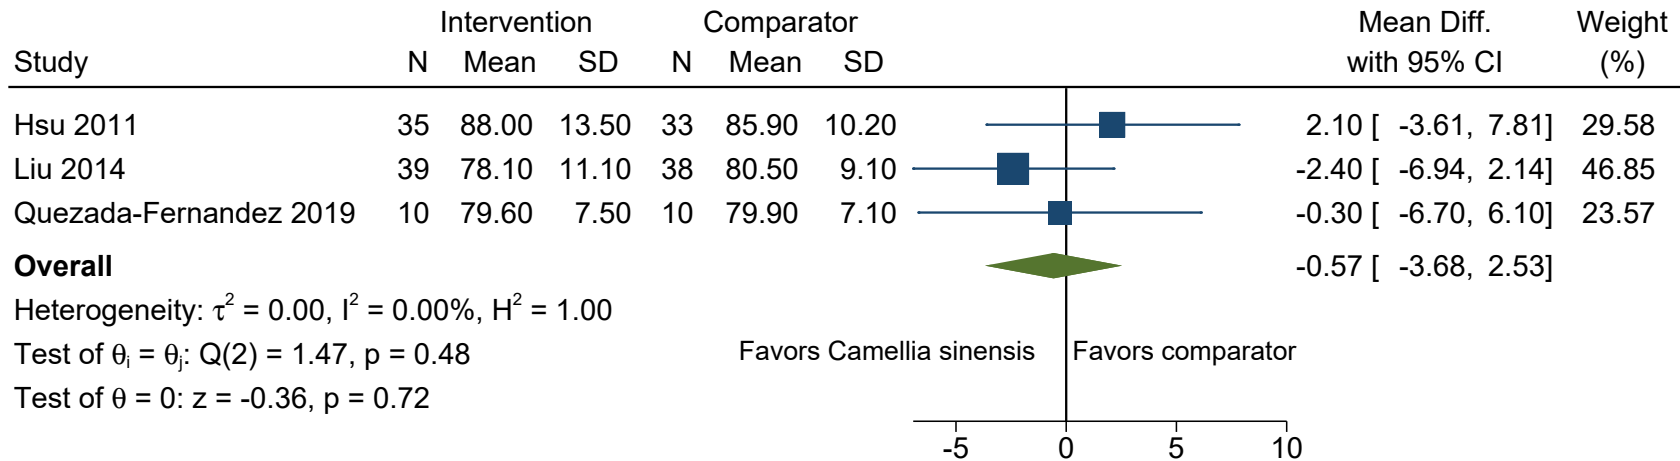

Random-effects REML model

Supplement: Data_Sheet_1.zip [file Data_Sheet_1.zip]

# Trigonella foenum-graecum - TC

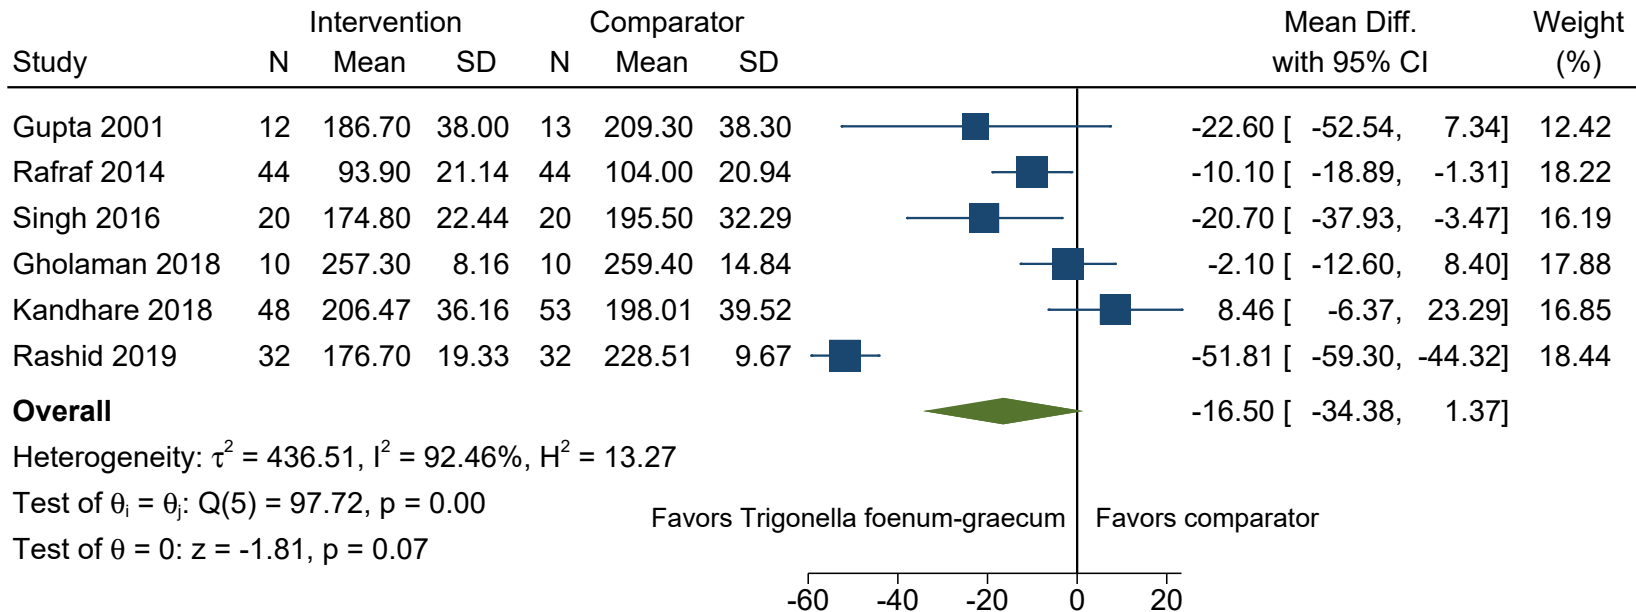

Random-effects REML model

Supplement: Data_Sheet_1.zip [file Data_Sheet_1.zip]

# Trigonella foenum-graecum - FBG

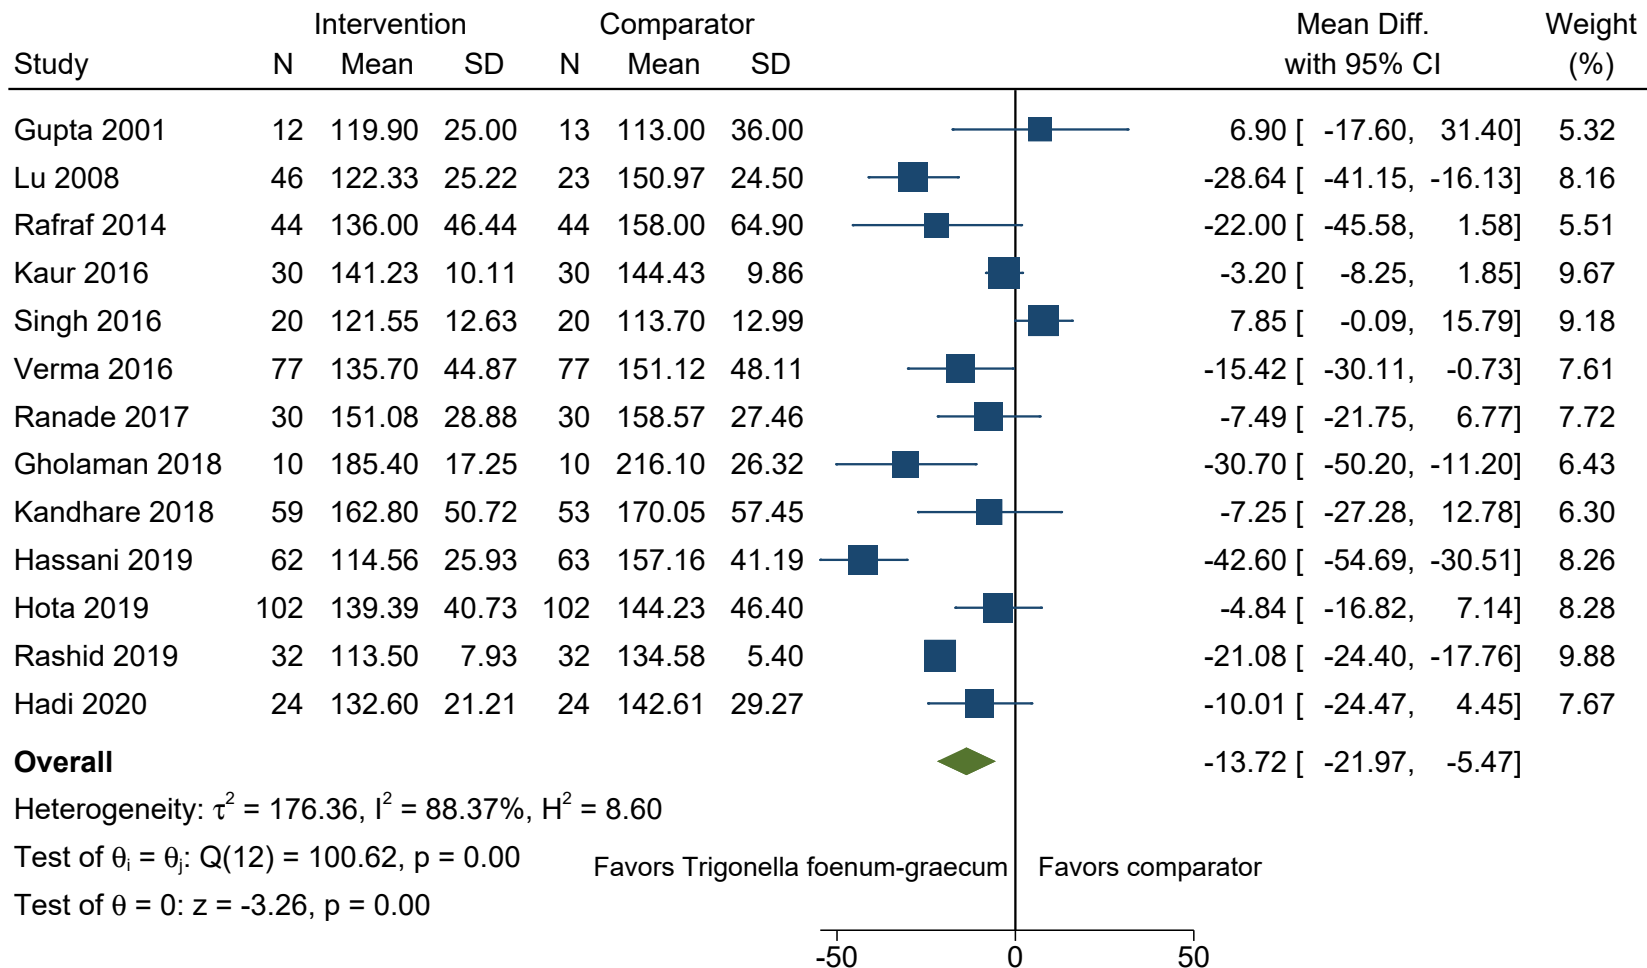

Supplement: Data_Sheet_1.zip [file Data_Sheet_1.zip]

# Cinnamomum aromaticum - HbA1c

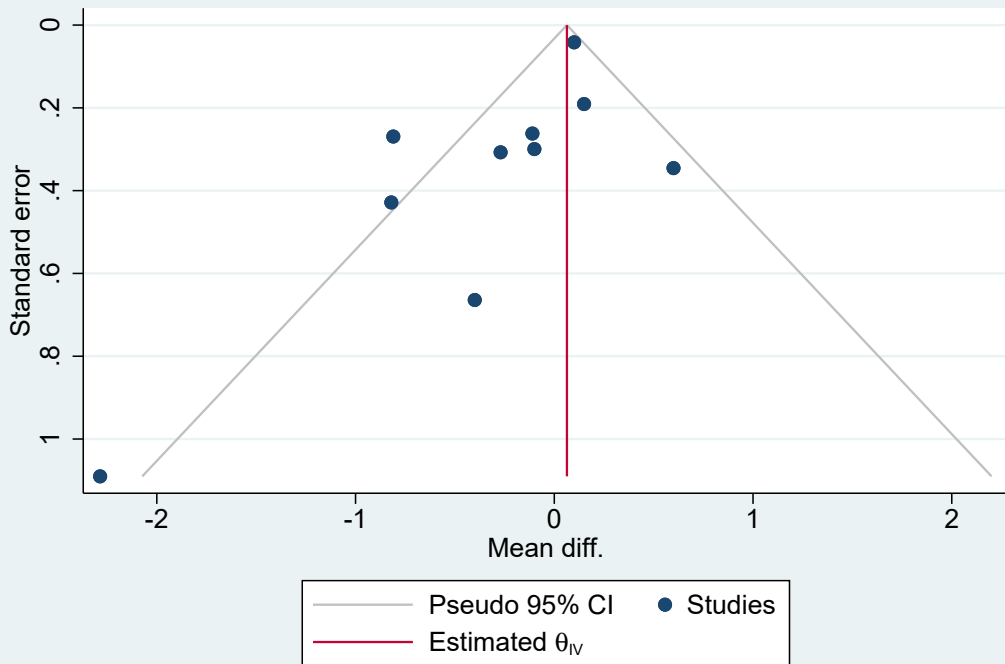

Supplement: Data_Sheet_1.zip [file Data_Sheet_1.zip]

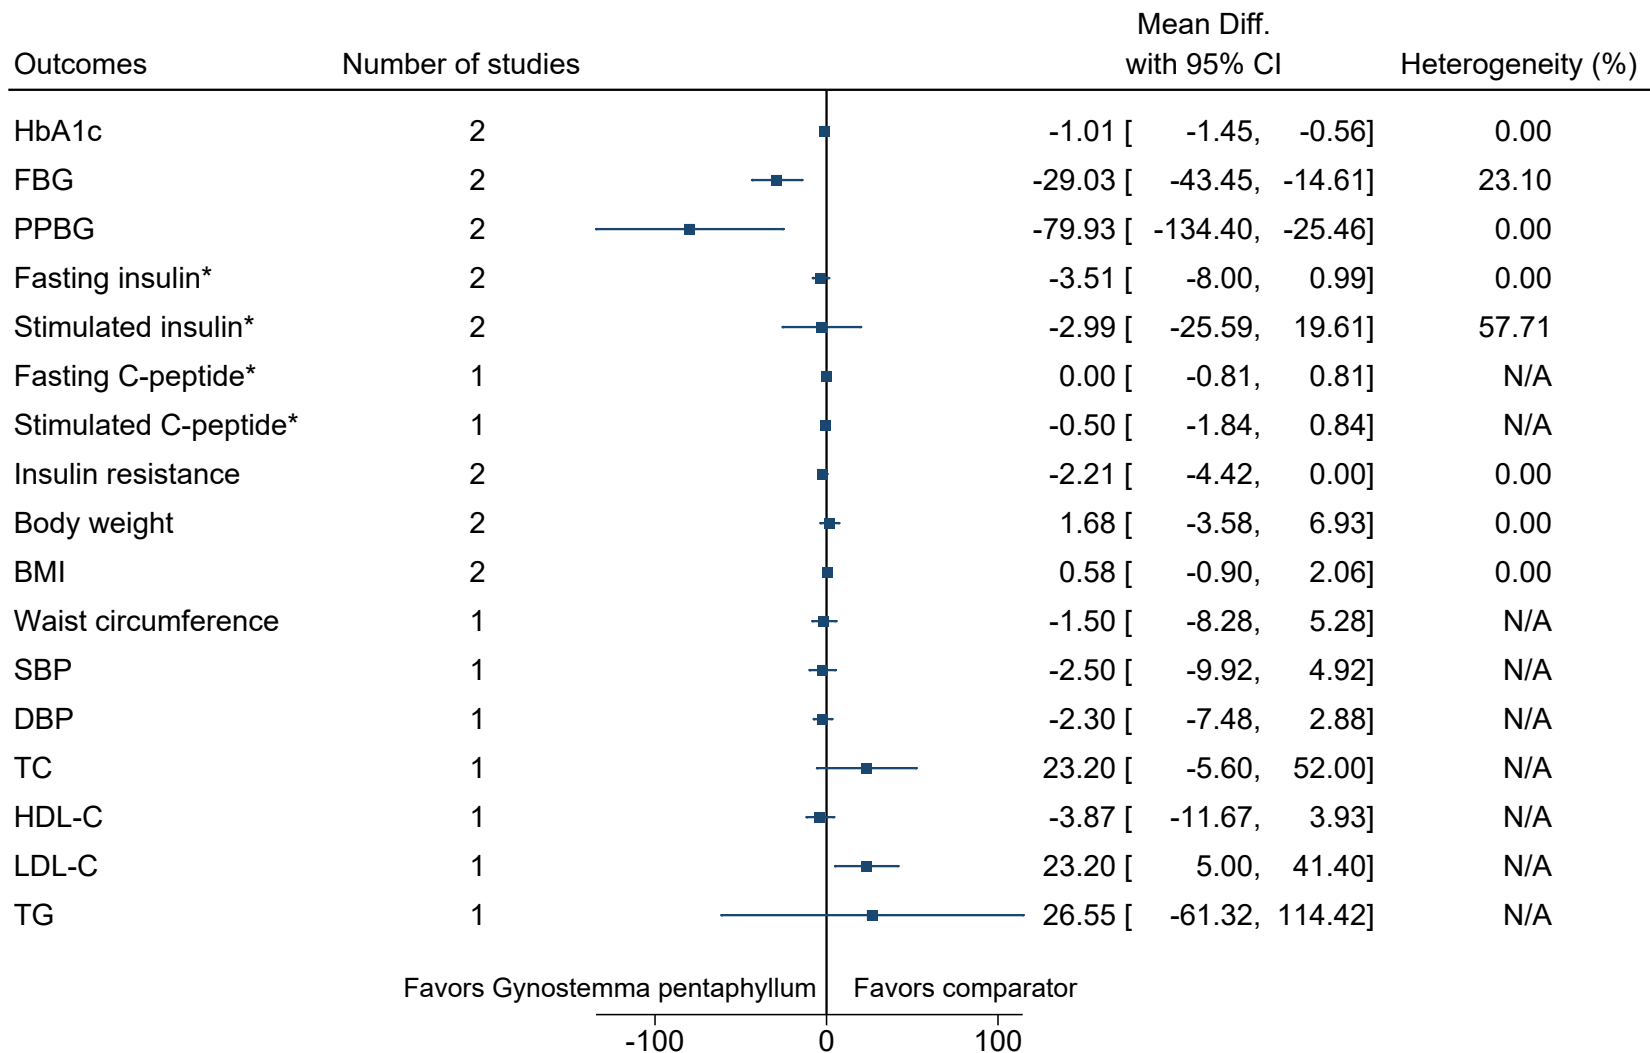

\*Favors intervention/comparator as insulin sensitizer

Supplement: Data_Sheet_1.zip [file Data_Sheet_1.zip]

# Enicostemma axillare - PPBG

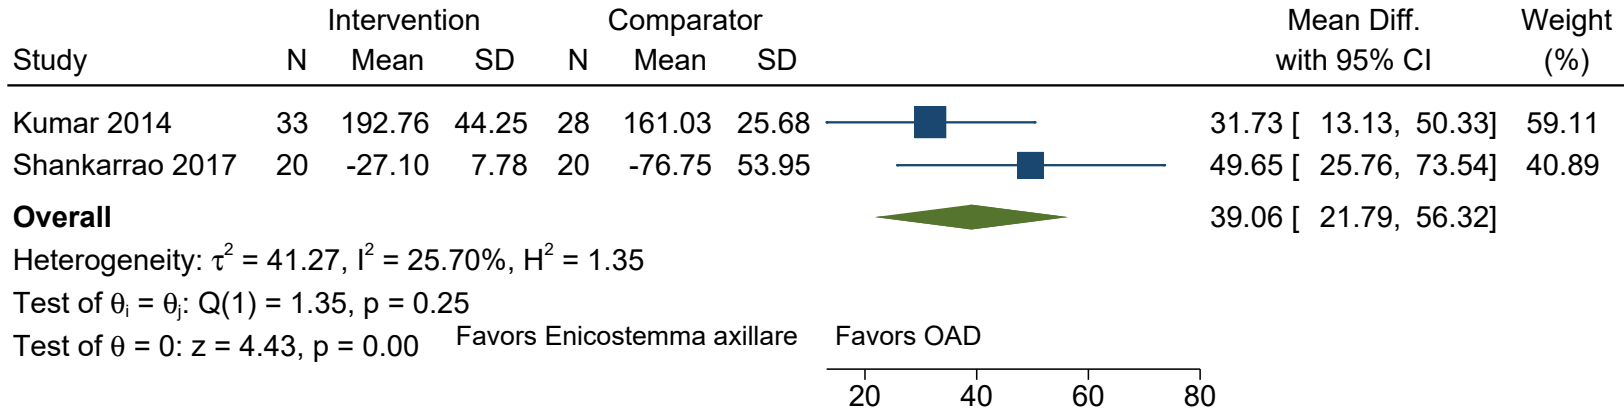

Random-effects REML model

Supplement: Data_Sheet_1.zip [file Data_Sheet_1.zip]

# Juglans regia - BMI

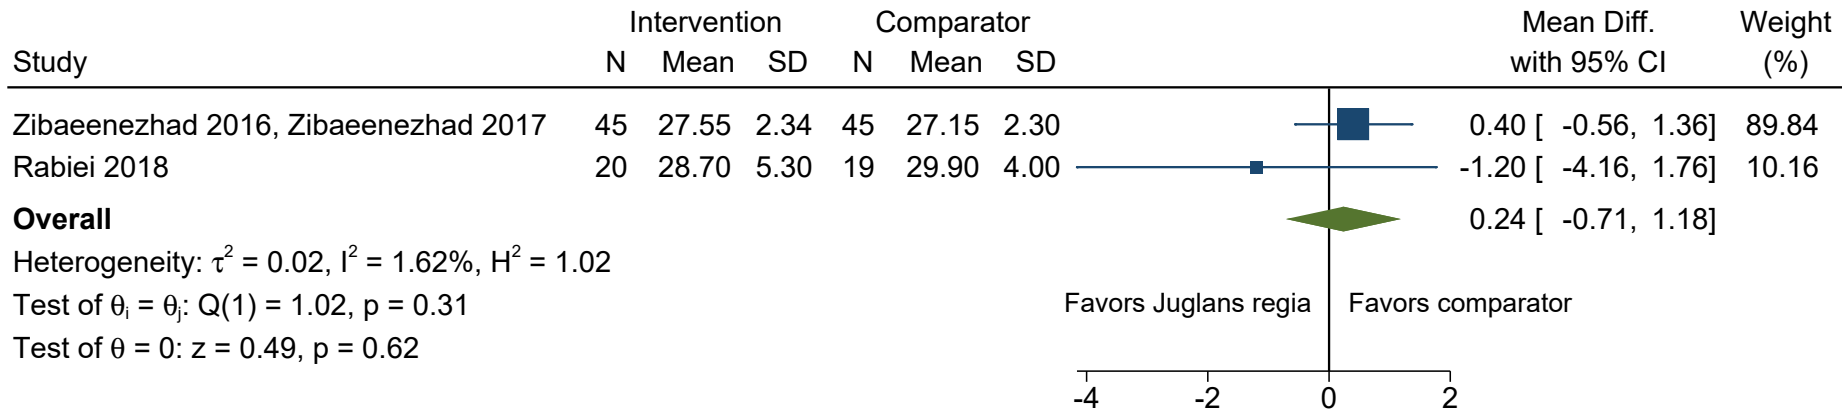

Random-effects REML model

Supplement: Data_Sheet_1.zip [file Data_Sheet_1.zip]

# Zingiber officinale - Fasting insulin

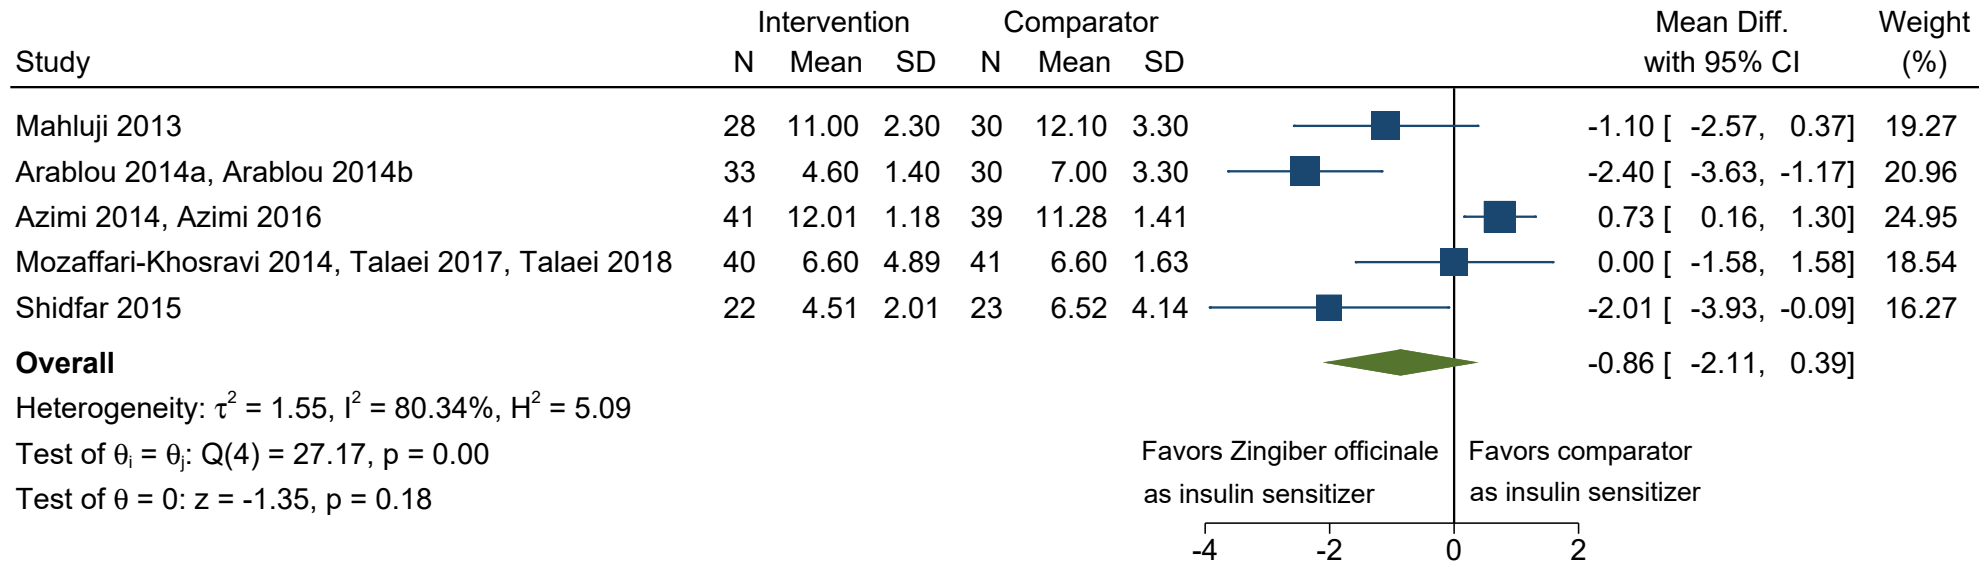

Supplement: Data_Sheet_1.zip [file Data_Sheet_1.zip]

# Zingiber officinale - TG

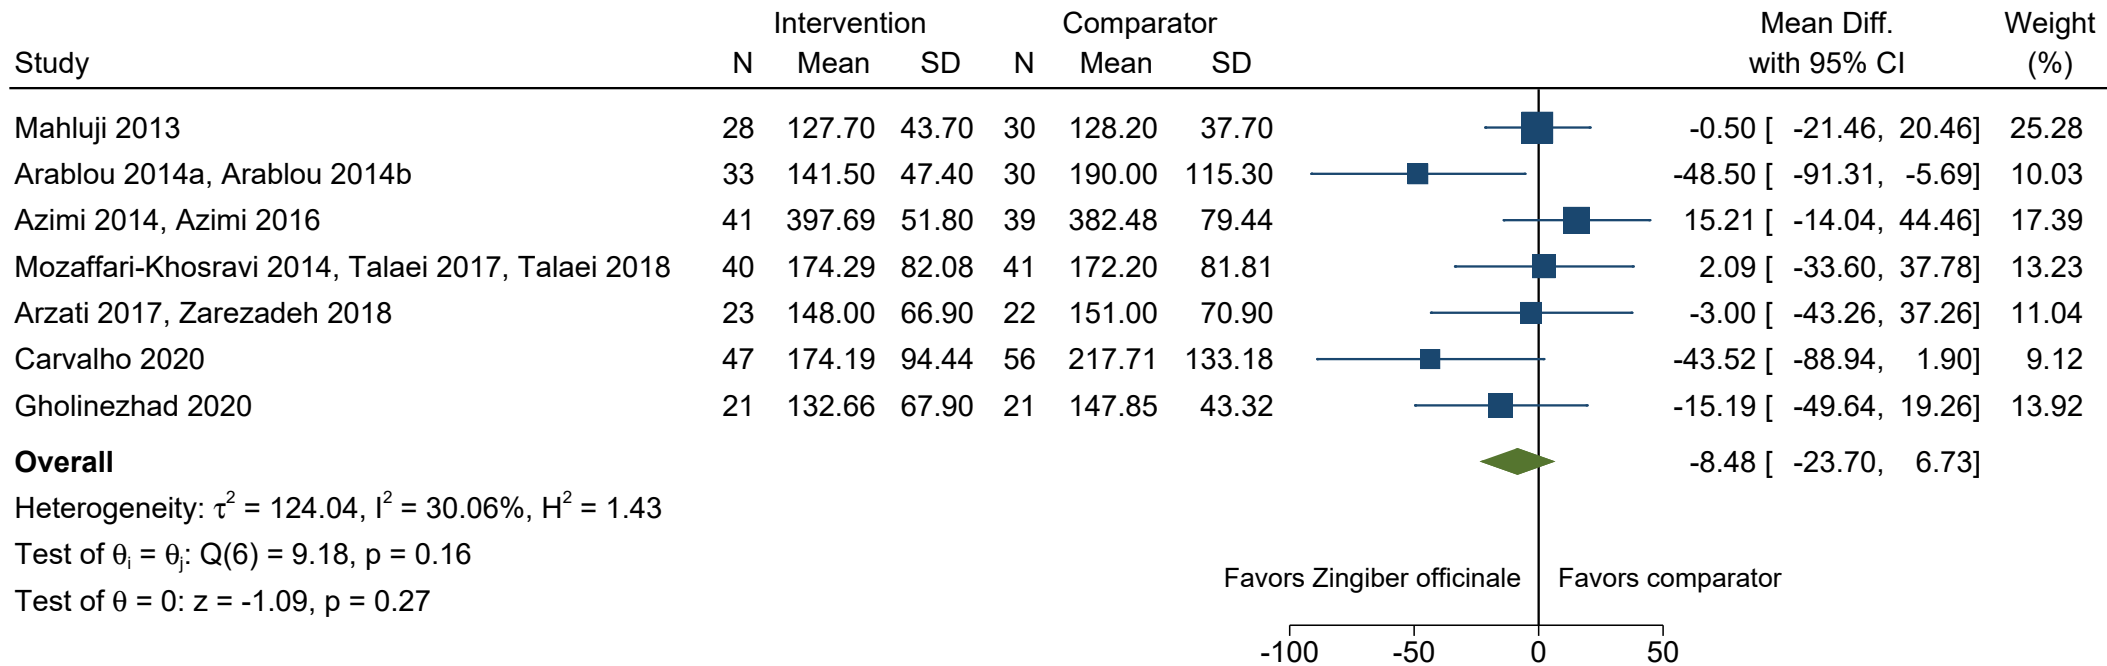

Supplement: Data_Sheet_1.zip [file Data_Sheet_1.zip]

# Sesamum indicum - Fasting insulin

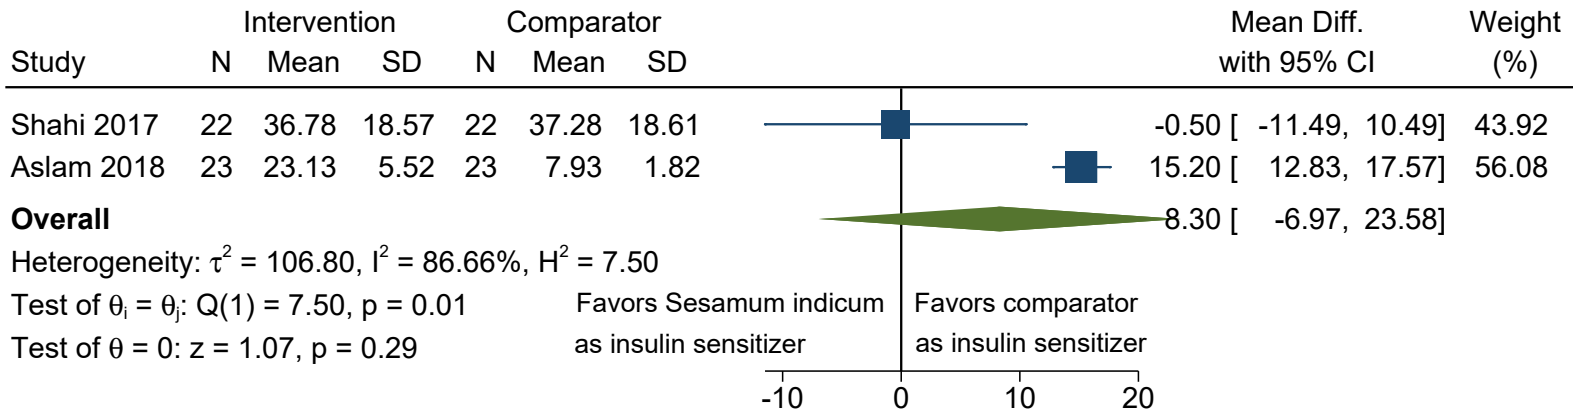

Random-effects REML model

Supplement: Data_Sheet_1.zip [file Data_Sheet_1.zip]

# Punica granatum - HbA1c

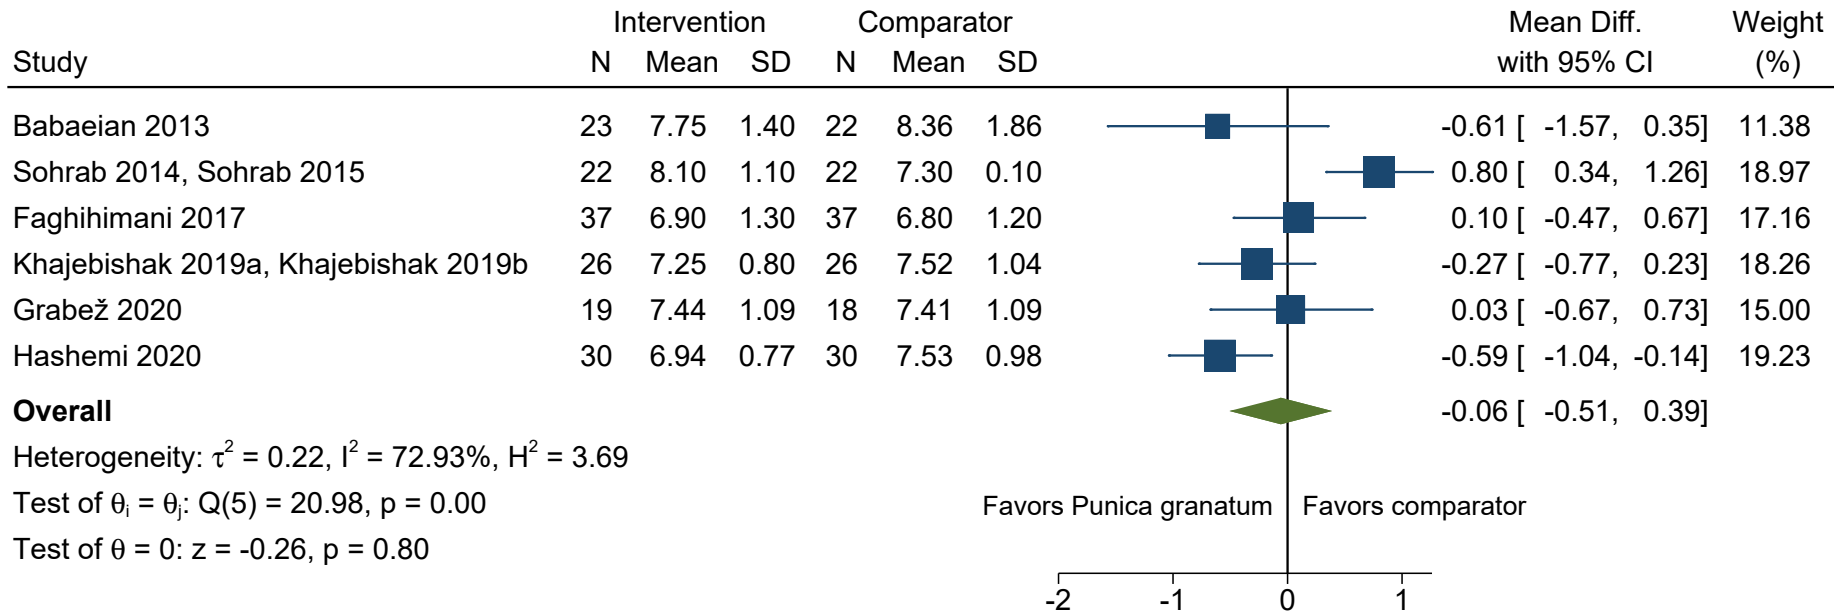

Supplement: Data_Sheet_1.zip [file Data_Sheet_1.zip]

# Juglans regia - TC

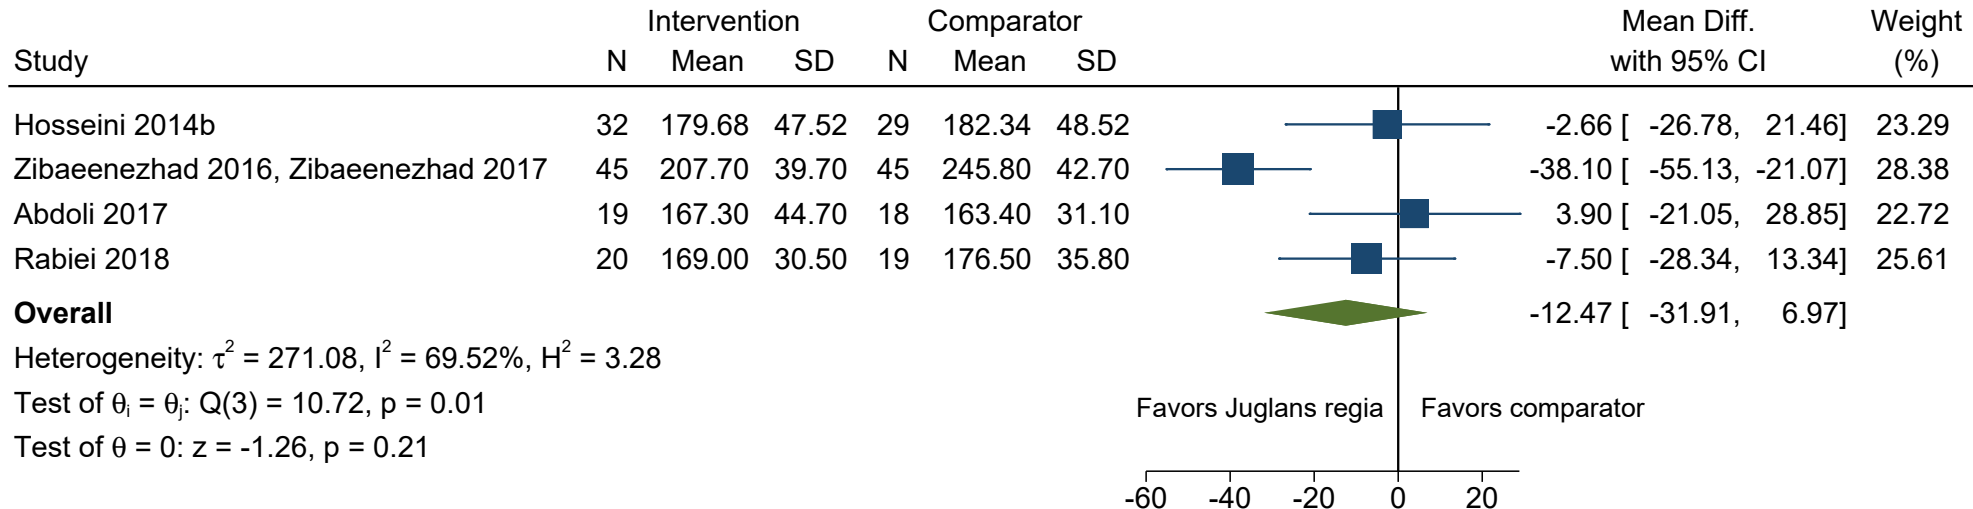

Random-effects REML model

Supplement: Data_Sheet_1.zip [file Data_Sheet_1.zip]

# Zingiber officinale - Insulin resistance

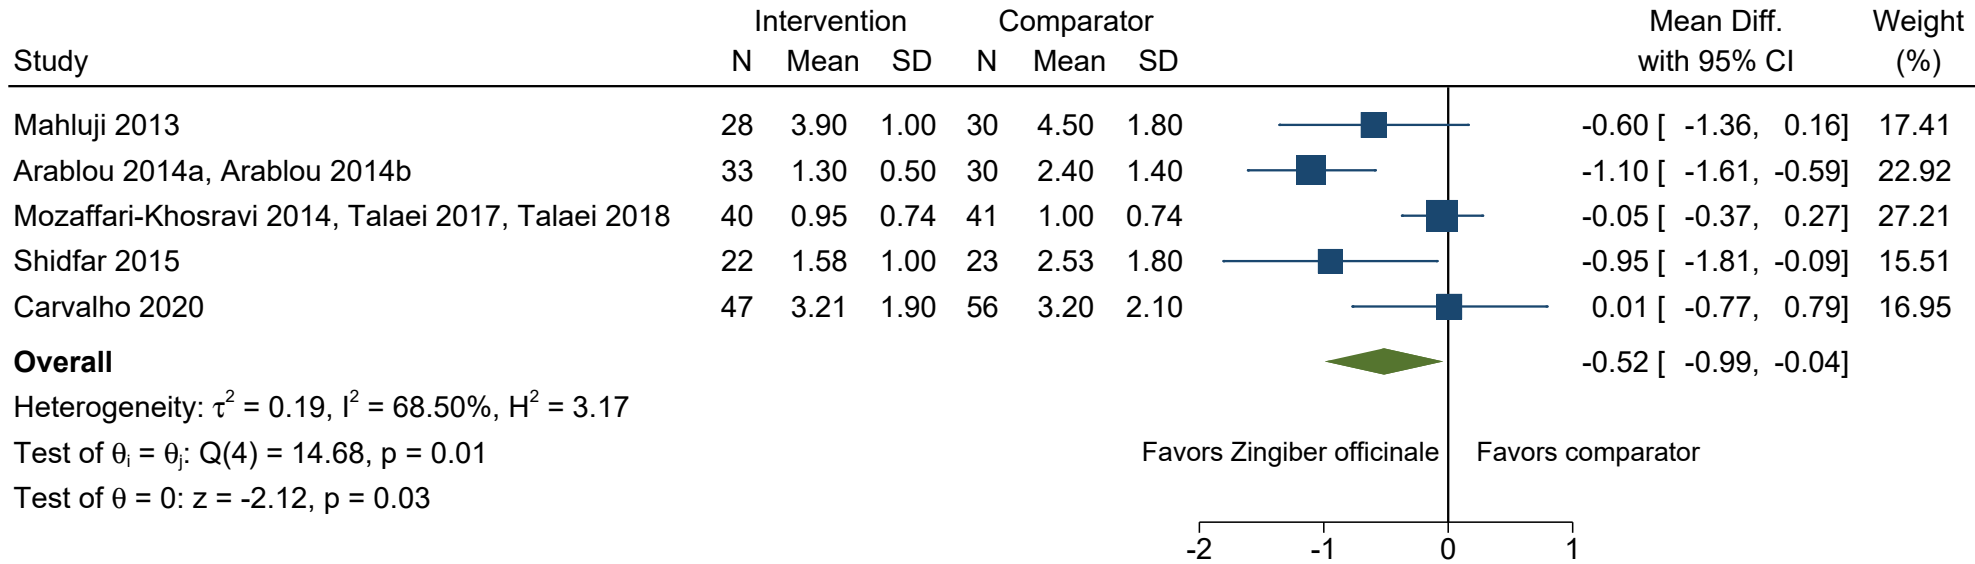

Supplement: Data_Sheet_1.zip [file Data_Sheet_1.zip]

# Momordica charantia - Waist circumference

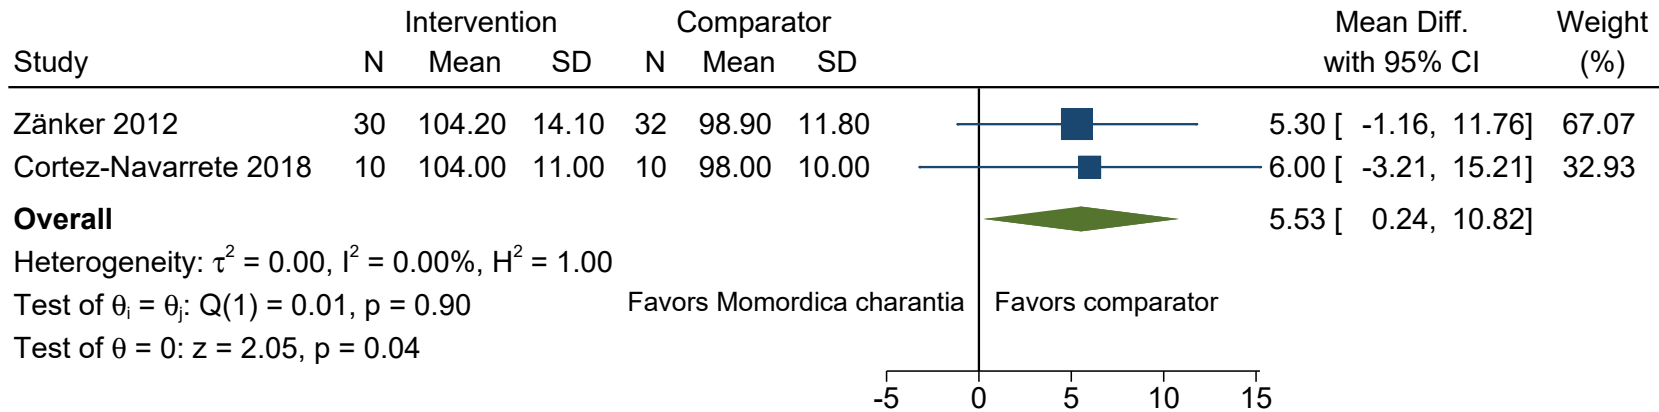

Random-effects REML model

Supplement: Data_Sheet_1.zip [file Data_Sheet_1.zip]

# Urtica dioica - Fasting insulin

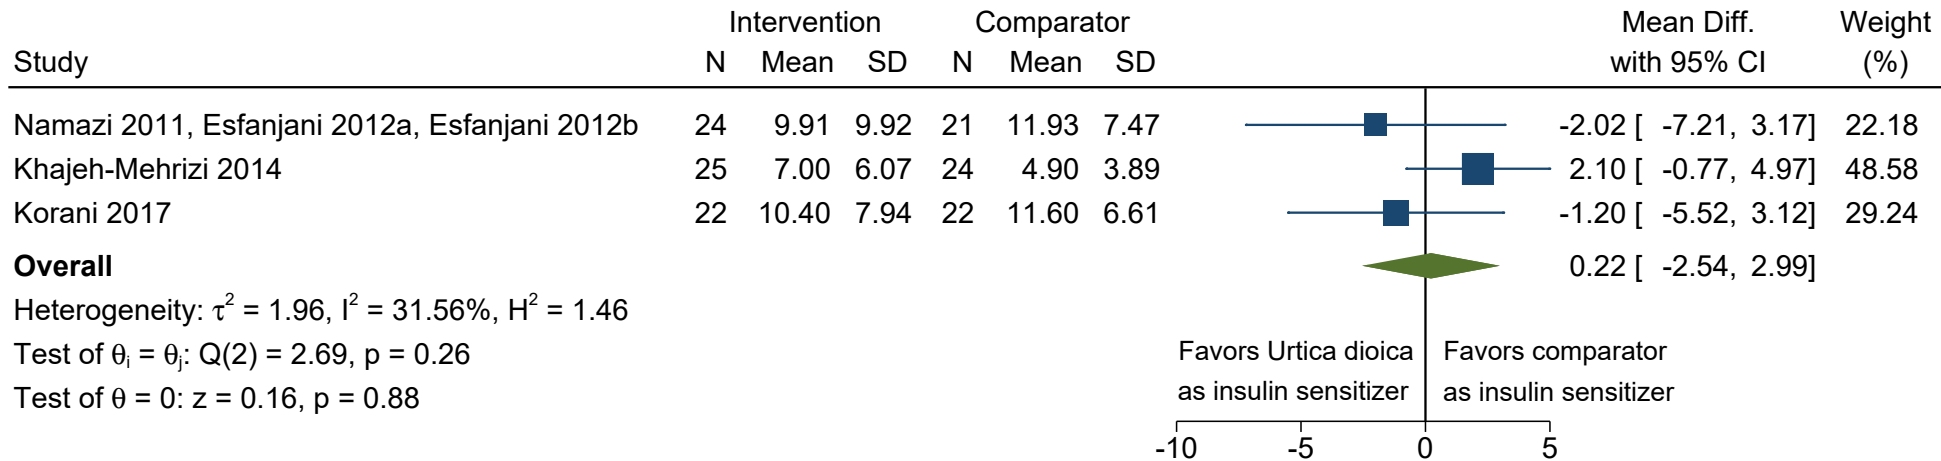

Random-effects REML model

Supplement: Data_Sheet_1.zip [file Data_Sheet_1.zip]
