# Supplementary figures and images for: Effectiveness and Safety of Ayurvedic Medicines in Type 2 Diabetes Mellitus Management: A Systematic Review and Meta-Analysis (part 4 of 4)
Source: Frontiers journal article supplement (doi:10.3389/fphar.2022.821810), 2022-06-08

# Ipomoea batatas - HbA1c

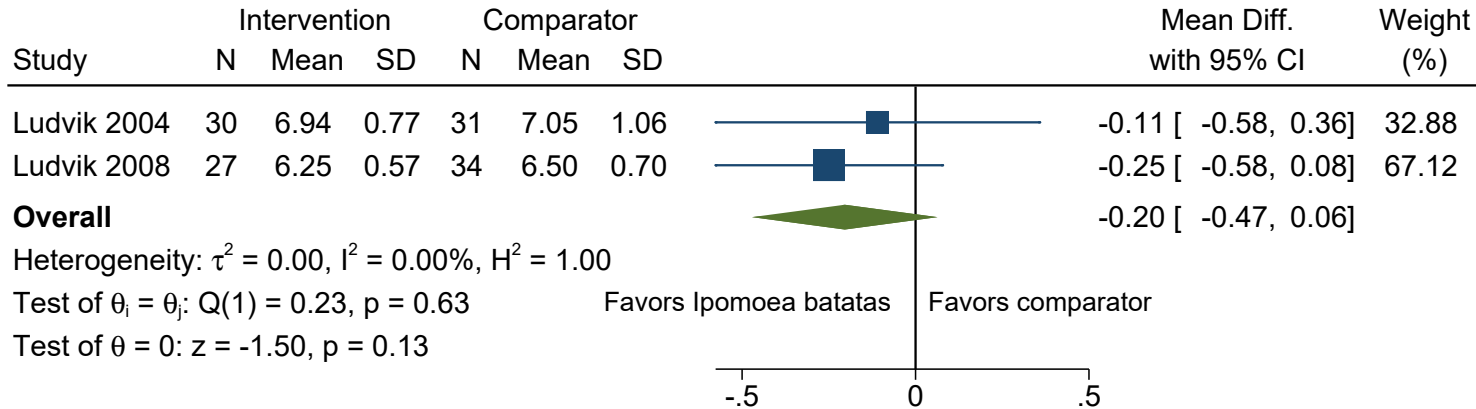

Random-effects REML model

Supplement: Data_Sheet_1.zip [file Data_Sheet_1.zip]

# Shilajit - LDL-C

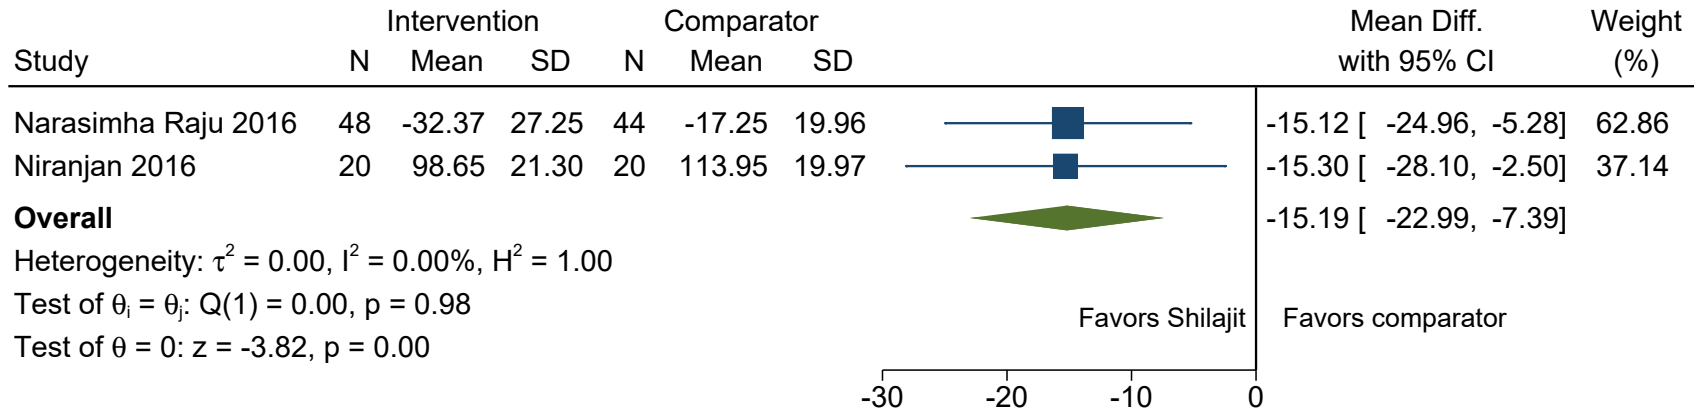

Random-effects REML model

Supplement: Data_Sheet_1.zip [file Data_Sheet_1.zip]

# Curcuma longa - Waist circumference

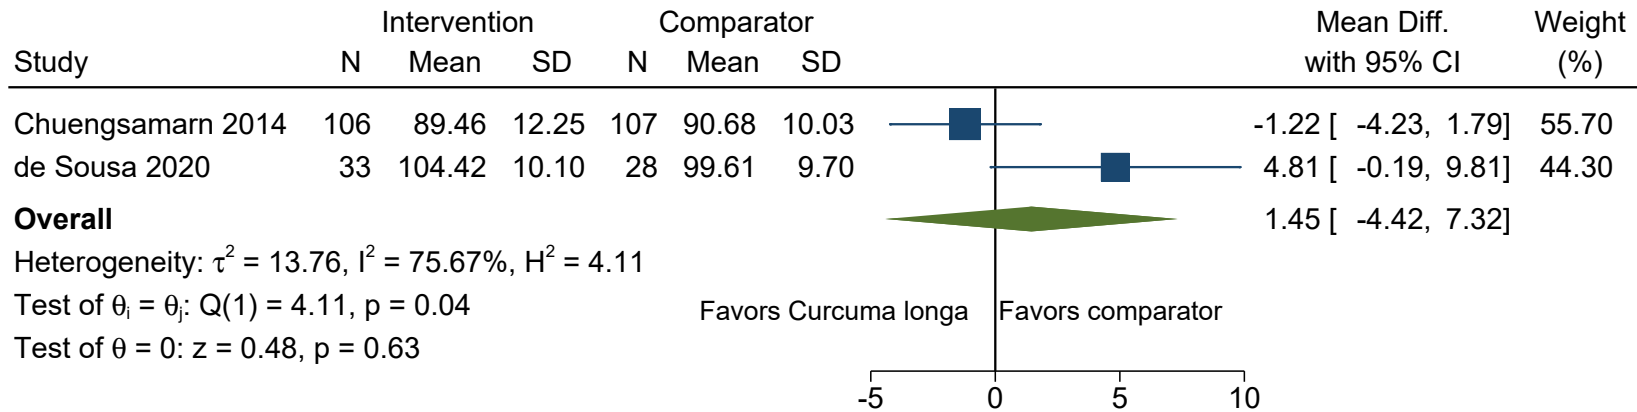

Random-effects REML model

Supplement: Data_Sheet_1.zip [file Data_Sheet_1.zip]

# Trigonella foenum-graecum - HbA1c - sensitivity analysis

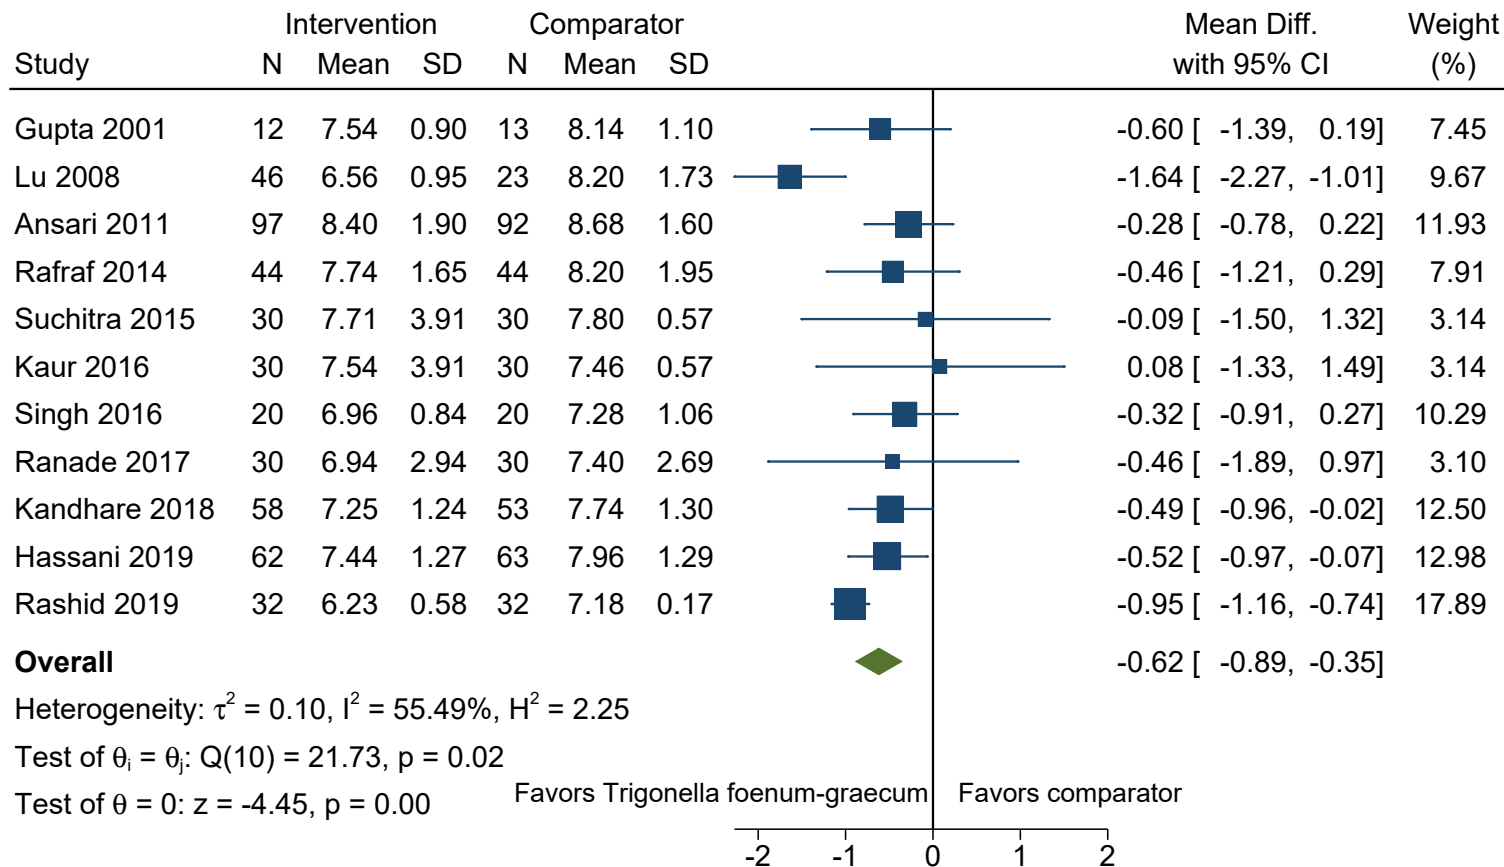

Supplement: Data_Sheet_1.zip [file Data_Sheet_1.zip]

# Cyamopsis tetragonoloba - TG

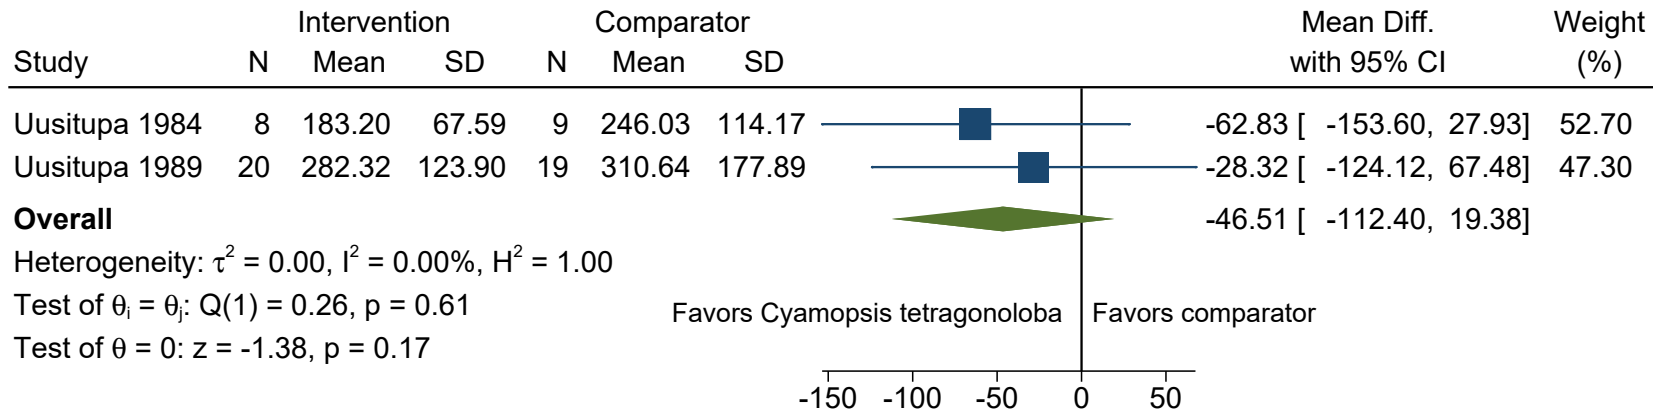

Random-effects REML model

Supplement: Data_Sheet_1.zip [file Data_Sheet_1.zip]

# Juglans regia - LDL-C

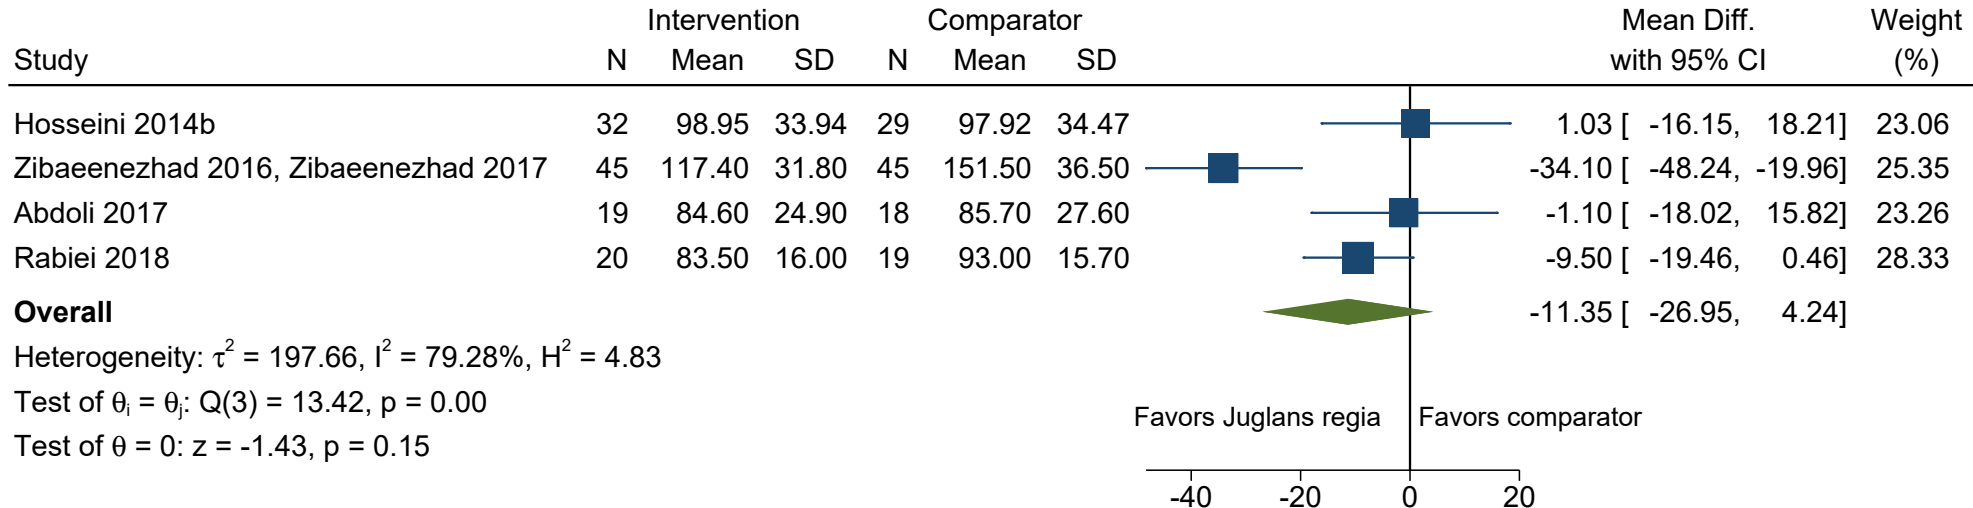

Supplement: Data_Sheet_1.zip [file Data_Sheet_1.zip]

# Trigonella foenum-graecum - FBG

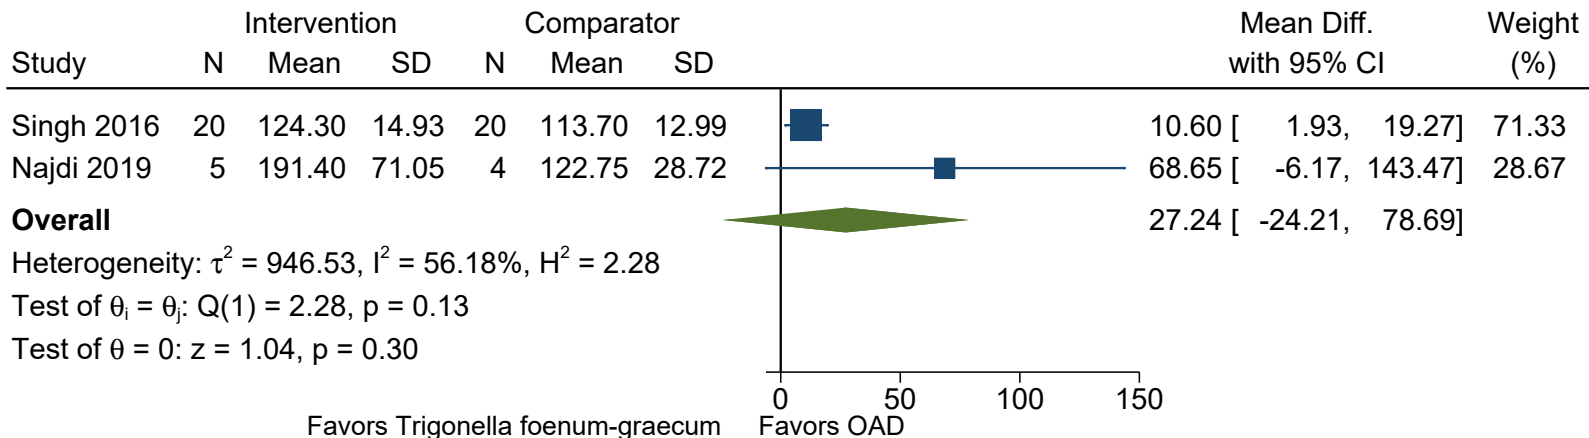

Random-effects REML model

Supplement: Data_Sheet_1.zip [file Data_Sheet_1.zip]

# Trigonella foenum-graecum - Insulin resistance

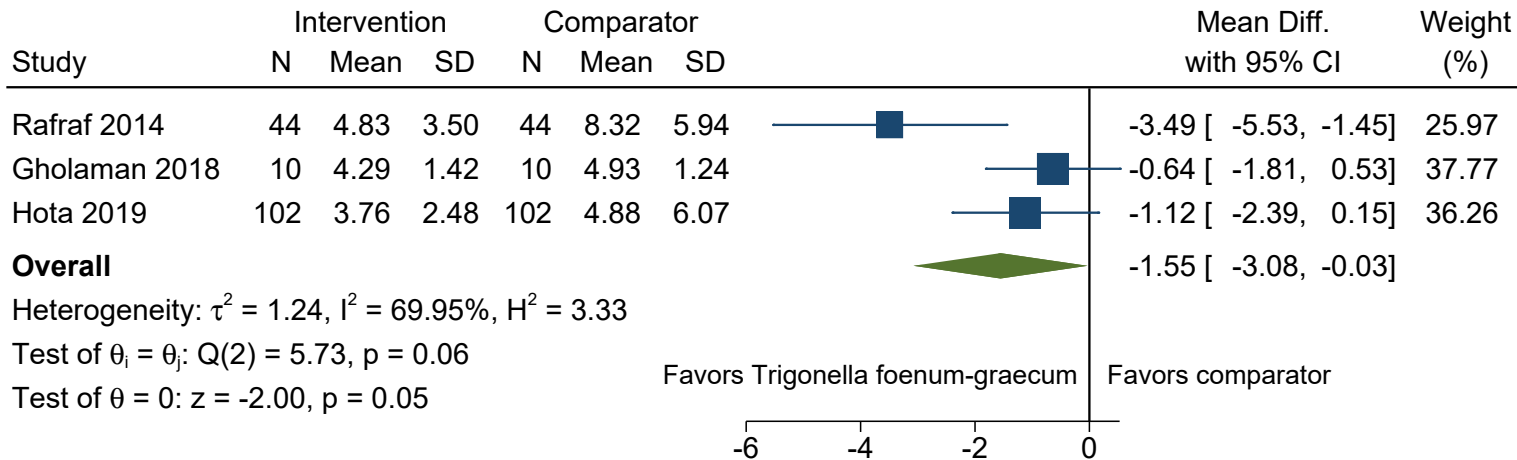

Supplement: Data_Sheet_1.zip [file Data_Sheet_1.zip]
